# Supplementary material
Source: PubMed Central journal article supplement (PMC4024831)
Supplement: NIHMS550325-supplement-1.pdf [file NIHMS550325-supplement-1.pdf]

## Probing Chemical Space with Alkaloid-Inspired Libraries

Michael C McLeod, Gurpreet Singh, James N Plampin III, Digamber Rane,  
Jenna L. Wang, Victor W. Day & Jeffrey Aubé\*

Department of Medicinal Chemistry, Delbert M. Shankel Structural Biology Center, University of  
Kansas, 2034 Becker Drive, Lawrence, Kansas 66045, United States

jaube@ku.edu

### Supplementary Information

#### Table of Contents

##### I. Supplementary results

Supplementary Tables 1-3 and Figures 1-3 S3

**II. Supplementary Methods:** Experimental procedures and characterization data for scaffolds and scaffold intermediates.

A. *Stemona* alkaloid-inspired scaffolds S9  
B. Cylindricine-inspired scaffolds S19  
C. Sparteine-inspired scaffolds S32  
D. Mesembrine-inspired scaffolds S38

**III. Supplementary Methods:** Experimental procedures for library synthesis, characterization data for representative library compounds and tabulated results.

A. *Stemona* alkaloid-inspired scaffolds S54  
B. Cylindricine-inspired scaffolds S74  
C. Sparteine-inspired scaffolds S87  
D. Mesembrine-inspired scaffolds S97

##### IV. Supplementary Note: Cheminformatic analysis.

Principal component analysis S108  
Principal moment of inertia analysis S111

**V. Supplementary Note**

1H & 13C NMR spectra for intermediates, scaffolds and  
representative library compounds

S113

**VI. Supplementary Note**

X-ray crystallography data

S275

**VII. Supplementary References**

S281

**Supplementary Table 1.** Comprehensive list of references associated with bioactivity in the *Stemona*, cylindricine/lepadiformine/fasicularin, *Amaryllidaceae* and Lupin families of alkaloids.

| Alkaloid Family                        | Reviews / original biological activity articles                                                                                                                                                                                                                                                                                                                                                                                                                  |
|----------------------------------------|------------------------------------------------------------------------------------------------------------------------------------------------------------------------------------------------------------------------------------------------------------------------------------------------------------------------------------------------------------------------------------------------------------------------------------------------------------------|
| <i>Stemona alkaloids</i>               | <ul style="list-style-type: none"> <li>• Reviews<sup>1-3</sup></li> <li>• Antitussive<sup>4-8</sup></li> <li>• Insecticidal, antifeedant, larvicidal<sup>9-15</sup></li> <li>• neuromuscular<sup>16</sup></li> <li>• anthelmintic<sup>17</sup></li> <li>• AChE inhibition<sup>14,18-20</sup></li> <li>• Reversal of MDR-cancers<sup>21,22</sup></li> </ul>                                                                                                       |
| cylindricine/lepadiformine/fasicularin | <ul style="list-style-type: none"> <li>• Review<sup>23</sup></li> <li>• cytotoxicity<sup>24-27</sup></li> <li>• cardiovascular actions<sup>28,29</sup></li> </ul>                                                                                                                                                                                                                                                                                                |
| <i>Amaryllidaceae</i> alkaloids        | <ul style="list-style-type: none"> <li>• Review<sup>30</sup></li> <li>• serotonin reuptake inhibition<sup>31</sup></li> <li>• 5-hydroxytryptamine reuptake inhibition<sup>32</sup></li> <li>• PDE4 inhibition<sup>32,33</sup></li> <li>• AChE inhibition<sup>34</sup></li> <li>• antileukemic<sup>35</sup></li> <li>• cytotoxicity<sup>36</sup></li> </ul>                                                                                                       |
| Lupin alkaloids                        | <ul style="list-style-type: none"> <li>• Reviews: cytisine<sup>37,38</sup> sparteine<sup>38</sup></li> <li>• anti-arrhythmic<sup>39</sup></li> <li>• nicotinic ester agonism<sup>40</sup>/antagonism<sup>38,41</sup></li> <li>• acetylcholine agonist: (cytisine – many different studies. For examples of early work on bioactivity with <i>in vivo</i> studies see<sup>42-44</sup>; for later work with radiolabelled cytisine see<sup>45,46</sup>)</li> </ul> |

**Supplementary Table 2.** Average bioavailability properties and fraction  $sp^3$  hybridized carbon atoms of scaffolds, library members and reference set compounds.

|                              | Drugs | NPs  | Commercial | Alk NP | Scaffolds | Sparteine library | Stenine library | Mesembrine library | Cylindricine library | All libraries |
|------------------------------|-------|------|------------|--------|-----------|-------------------|-----------------|--------------------|----------------------|---------------|
| <b>m/w</b>                   | 361   | 629  | 414        | 319    | 243       | 354               | 364             | 311                | 387                  | 355           |
| <b>XlogP</b>                 | 2.7   | 1.5  | 2.4        | 2.0    | 2.3       | 3.7               | 3.5             | 2.7                | 6.1                  | 4.0           |
| <b>HBD</b>                   | 1.5   | 4.9  | 1.5        | 1.3    | 0.7       | 1.2               | 0.6             | 0.4                | 1.0                  | 0.8           |
| <b>HBA</b>                   | 5.4   | 10.8 | 6.8        | 4.4    | 2.5       | 4.8               | 4.5             | 4.3                | 3.8                  | 4.3           |
| <b>% Pass Lipinski (4/4)</b> | 85    | 42   | 95         | 90     | 100       | 83                | 100             | 100                | 13                   | 72            |
| <b>% Pass Lipinski (3/4)</b> | 98    | 53   | 100        | 100    | 100       | 100               | 100             | 100                | 100                  | 100           |
| <b>RotB</b>                  | 6.3   | 9.7  | 5.7        | 2.8    | 1.7       | 5.2               | 3.0             | 2.0                | 6.3                  | 4.1           |
| <b>tPSA</b>                  | 69    | 183  | 98         | 54     | 33        | 48                | 47              | 38                 | 35                   | 42            |
| <b>% Pass Veber</b>          | 88    | 33   | 95         | 95     | 100       | 100               | 100             | 100                | 100                  | 100           |
| <b>Fsp3 C atoms</b>          | 0.41  | 0.64 | 0.23       | 0.65   | 0.77      | 0.73              | 0.75            | 0.57               | 0.58                 | 0.66          |

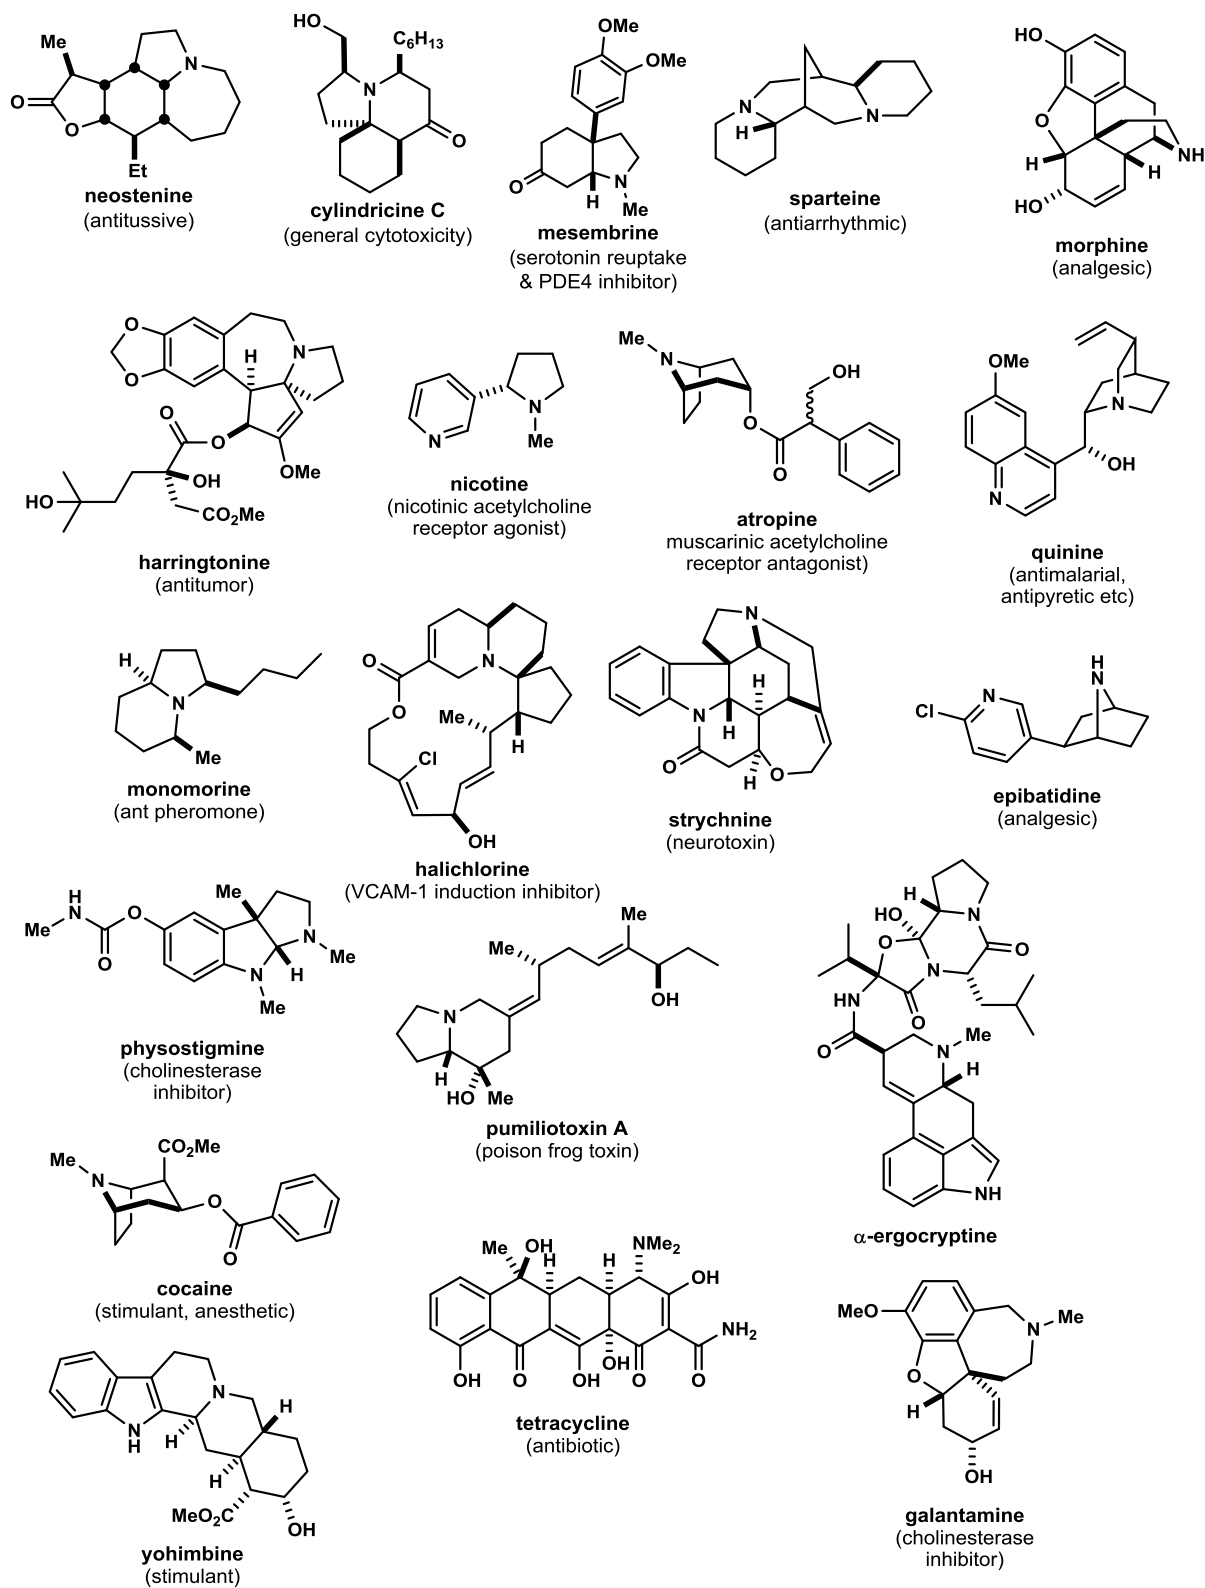

Supplementary Figure 1. Alkaloid natural product reference set for PCA analysis (20 structures).

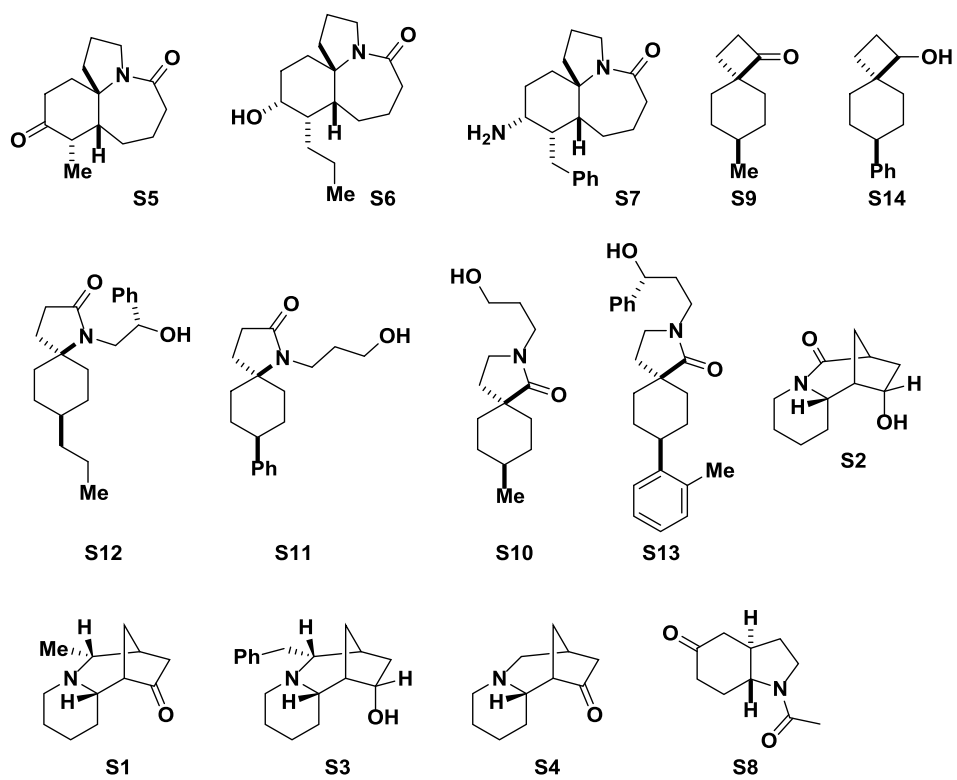

Supplementary Figure 2. Representative scaffolds used in PCA analysis (14 structures).

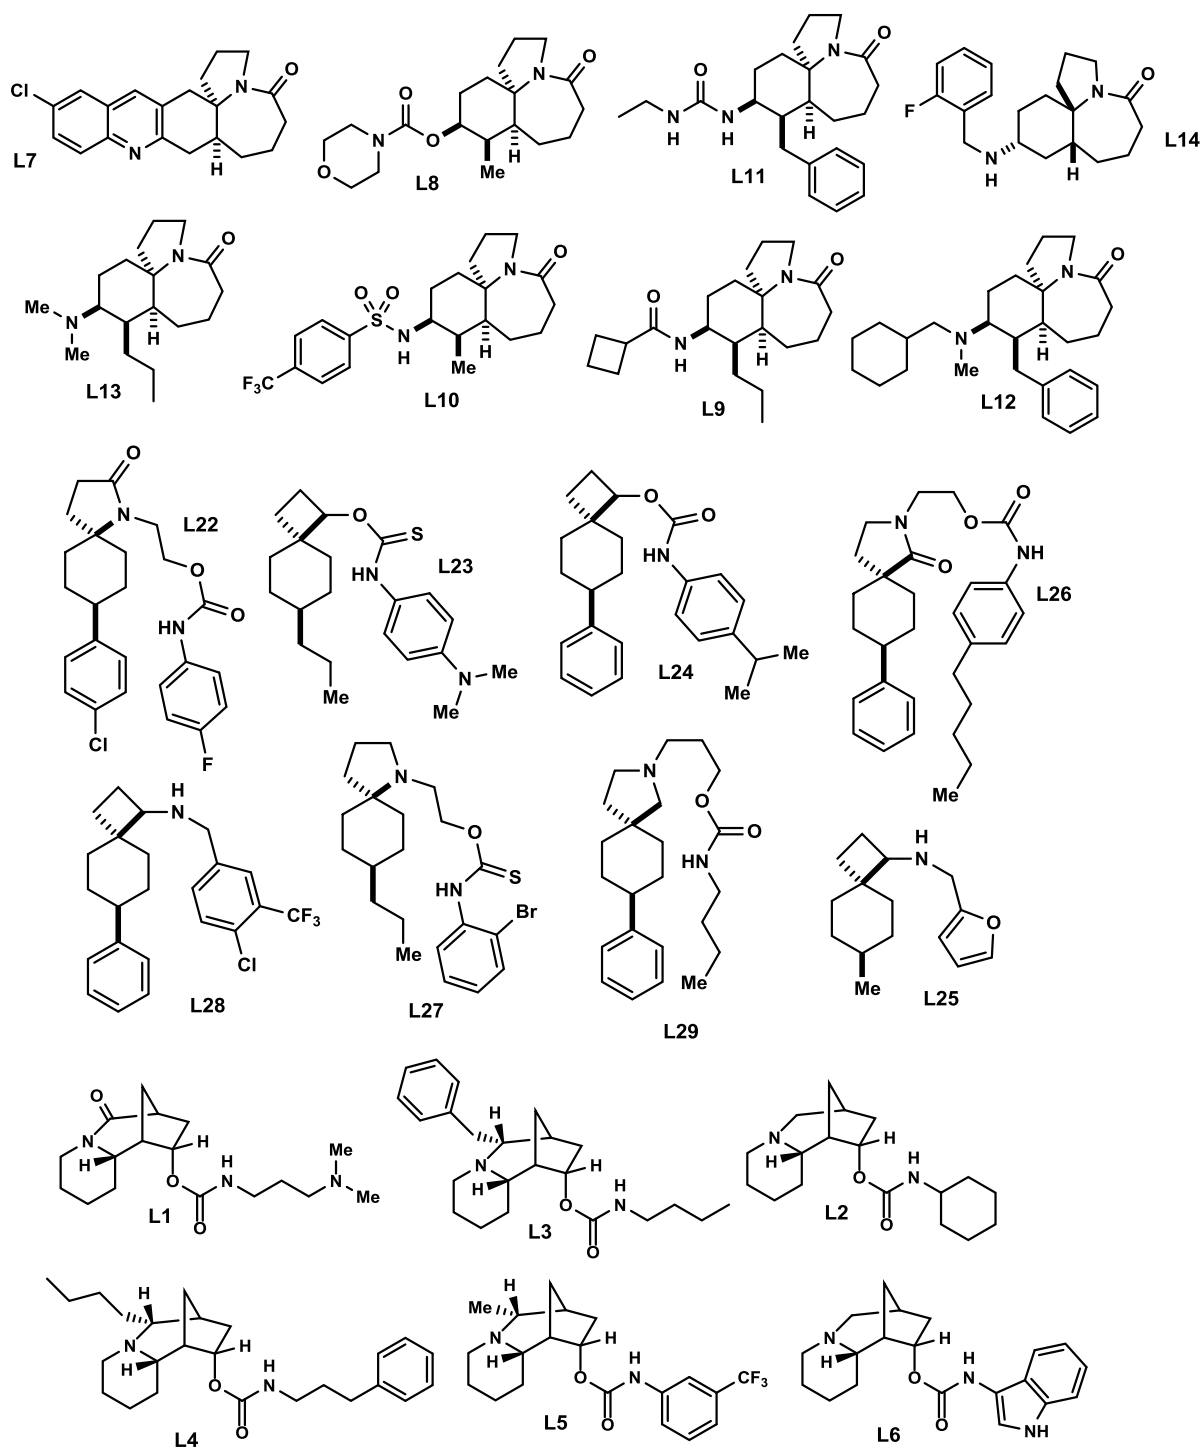

Supplementary Figure 3. Representative library compounds used in PCA analysis (29 structures) (continued on next page).

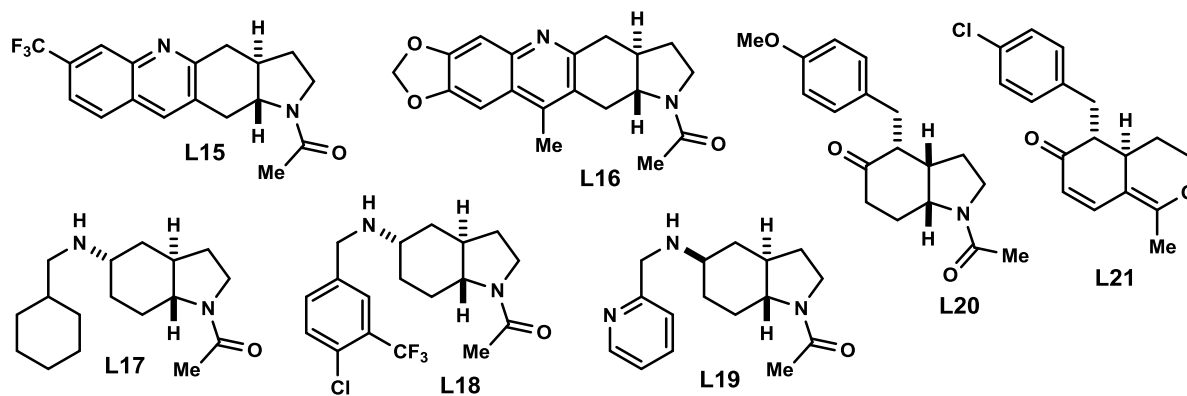

**Supplementary Figure 3 (continued). Representative library compounds used in PCA analysis (29 structures).**

**Supplementary Table 3. Composition of reference set of drugs, commercial library compounds and natural products<sup>47</sup> used in PCA.**

|                                        | Compounds                                                                   |                    |                    |                   |
|----------------------------------------|-----------------------------------------------------------------------------|--------------------|--------------------|-------------------|
| <b>Drugs</b> (40 compounds)            | Lipitor                                                                     | Lexapro            | Topamax            | Coreg             |
|                                        | Nexium                                                                      | Seroquel           | Toprol             | Valtrex           |
|                                        | Prevacid                                                                    | Protonix           | Zetia              | Adderall          |
|                                        | Flonase                                                                     | Ambien             | Fosamax            | Aciphex           |
|                                        | Serevent                                                                    | Actos              | Abilify            | Cymbalta          |
|                                        | Singulair                                                                   | Zoloft             | Levaquin           | Crestor           |
|                                        | Effexor                                                                     | Wellbutrin         | Lamictal           | Diovan            |
|                                        | Plavix                                                                      | Avandia            | Celebrex           | Tricor            |
|                                        | Zocor                                                                       | Risperdal          | Benazepril         | Concerta          |
|                                        | Norvasc                                                                     | Zyprexa            | Zyrtec             | Imitrex           |
|                                        | <b>Commercial screening libraries</b> (20 compounds; pubchem compound CIDs) | <b>ChemBridge:</b> | 5771429            | 5309975           |
| 5771374                                |                                                                             | 5309772            | 5309246            | 5771496           |
| 5771371                                |                                                                             | 5309762            | 5309020            |                   |
| <b>ChemDiv:</b>                        |                                                                             | 2529482            | 2474145            | 2490046           |
| 2474174                                |                                                                             | 1340935            | 2490068            | 2529498           |
| 2471337                                |                                                                             | 2490059            | 1342784            |                   |
| <b>Natural products</b> (60 compounds) | cephamycin C                                                                | mizoribine         | coformycin         | compactin         |
|                                        | spergualin                                                                  | SQ26180            | arglabin           | artemisinin       |
|                                        | forskolin                                                                   | thienamycin        | bestatin           | plaunotol         |
|                                        | daptomycin                                                                  | validamycin        | midecamycin A1     | rapamycin         |
|                                        | echinocandin B                                                              | avermectin B1a     | taxol              | FK506             |
|                                        | calicheamicin g1                                                            | cyclosporin A      | pseudomonic acid A |                   |
|                                        | lipstatin                                                                   | geldanamycin       | trapoxin B         | talaromycin B     |
|                                        | bleomycin                                                                   | actinonin          | vincristine        | spongistatin 1    |
|                                        | brefeldin A                                                                 | discodermolide     | colchicines        | radicicol         |
|                                        | cytochalasin B                                                              | monensin           | trichostatin       | salicylhalamide A |
|                                        | epothilone A                                                                | calyculin A        | fumagillin         | brevetoxin B      |
|                                        | apoptolidin                                                                 | amphotericin B     | staurosporine      | rifamycin B       |
|                                        | lactacystin                                                                 | adriamycin         | erythromycin A     | quinine           |
|                                        | duocarmycin A                                                               | ginkgolide B       | streptomycin       | mycobactin S      |
|                                        | zaragozic acid A                                                            |                    |                    |                   |



## II. Supplementary Methods

### A. Experimental procedures and characterization data for *Stemona* alkaloid-inspired scaffolds.

Supplementary Figure 4. Synthesis of *Stemona* alkaloid-inspired scaffolds

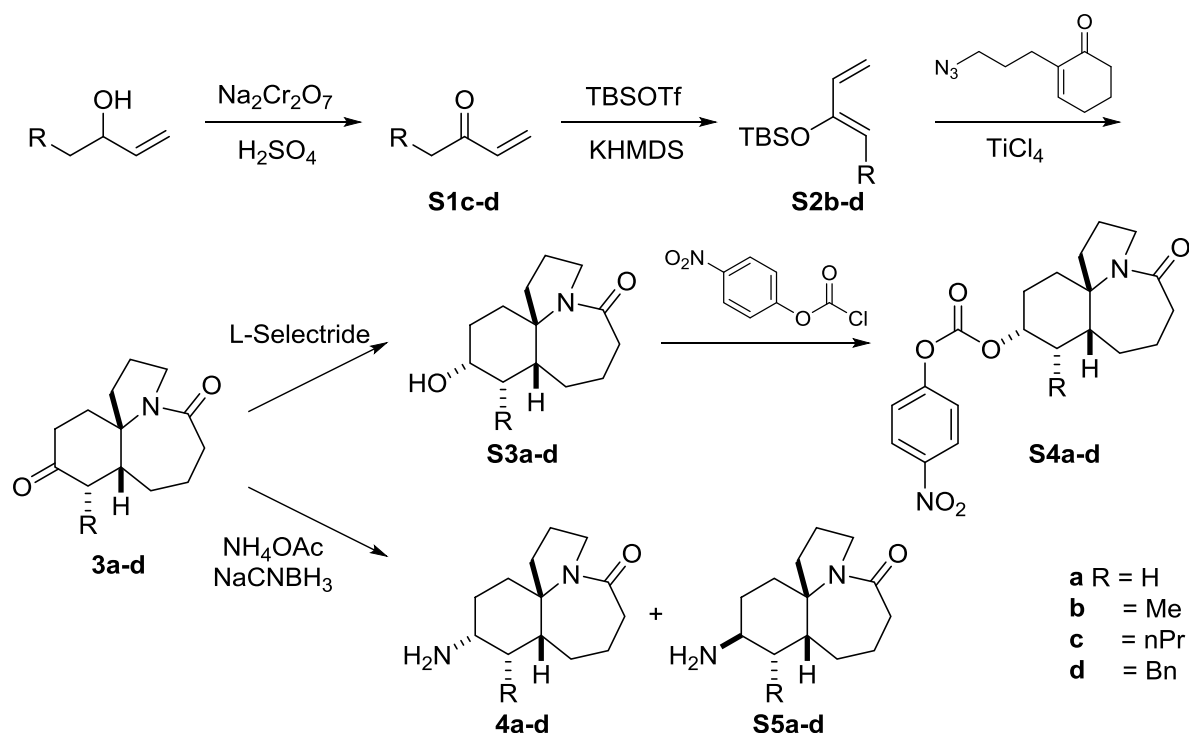

#### General procedure A: Oxidation of vinylic alcohols

##### Butylvinylketone, S1c

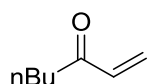

Concentrated  $\text{H}_2\text{SO}_4$  (48.8 mL, 880 mmol) was added dropwise over 10 min to a solution of sodium dichromate (65.6 g, 220 mL) in water (150 mL) at  $0^\circ\text{C}$ . The resulting bright orange solution was stirred at  $0^\circ\text{C}$  for a further 15 min, then added portionwise to a pre-cooled solution of 3-hydroxyhept-1-ene<sup>48</sup> (45.7 g, 400 mmol) in  $\text{Et}_2\text{O}$  (150 mL) at  $0^\circ\text{C}$ . The biphasic mixture was stirred vigorously at  $0^\circ\text{C}$  for 2 – 4 h. The organic layer was removed, and the aqueous extracted with  $\text{Et}_2\text{O}$  (2 x 100 mL). The combined organics were washed with saturated aq  $\text{NaHCO}_3$  (100 mL), water (100 mL) and brine (100 mL), dried ( $\text{Na}_2\text{SO}_4$ ) and concentrated to afford a brown oil. The residue was purified by chromatography (silica gel, 9:1 hexanes : ethyl acetate) to afford the title compound (34.8 g, 78%) as a yellow oil.  $\delta_{\text{H}}$  (400 MHz,  $\text{CDCl}_3$ ) 6.38 (1H, dd,  $J$  17.6, 10.5), 6.24 (1H, dd,  $J$  17.6, 1.3), 5.81 (1H, dd,  $J$  10.5, 1.3), 2.58 (2H, t,  $J$  7.4), 1.60 (2H, quintet  $J$  7.4), 1.34 (2H, sextet,  $J$  7.4), 0.91 (3H, t,  $J$  7.4);  $\delta_{\text{C}}$  (100 MHz,  $\text{CDCl}_3$ ) 201.2 (C), 136.6 (CH), 127.9 ( $\text{CH}_2$ ), 39.3 ( $\text{CH}_2$ ), 26.1 ( $\text{CH}_2$ ), 22.4 ( $\text{CH}_2$ ), 13.9 ( $\text{CH}_3$ ). The data closely matches that previously reported.<sup>49</sup>

### 5-Phenylpent-1-en-3-one, **S1d**

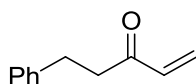

Following general procedure A, reaction of 3-hydroxyl-5-phenylpent-1-ene<sup>50</sup> (83.8 g, 517 mmol) provided the title compound (57.7 g, 70%) as a yellow oil.  $\delta_{\text{H}}$  (400 MHz,  $\text{CDCl}_3$ ) 7.42-7.17 (5H, m), 6.40 (1H, dd,  $J$  17.7, 10.5), 6.26 (1H, dd,  $J$  17.7, 1.1), 5.87 (1H, dd,  $J$  10.5, 1.1), 3.10-2.88 (4H, m);  $\delta_{\text{C}}$  (100 MHz,  $\text{CDCl}_3$ ) 199.8 (C), 141.1 (C), 136.5 (CH), 128.5 (CH), 128.4 (CH), 128.3 ( $\text{CH}_2$ ), 126.2 (CH), 41.2 ( $\text{CH}_2$ ), 29.8 ( $\text{CH}_2$ ). The data closely matches that previously reported.<sup>51</sup>

### (*Z*)-*tert*-Butyl(hepta-1,3-dien-3-yloxy)dimethylsilane, **S2c**

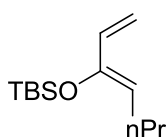

In an analogous method to Carreño *et al.*,<sup>52</sup> KHMDS (235 mL, 0.91 M in THF, 214 mmol) was added dropwise over 30 min to a solution of butylvinylketone **S1c** (20.0 g, 178 mmol) and TBSOTf (49.1 mL, 214 mmol) in dry THF (800 mL) at  $-78\text{ }^\circ\text{C}$  under argon. After the addition was complete, the reaction mixture was stirred at  $-78\text{ }^\circ\text{C}$  for 30 min then at room temperature for 1h, then quenched with sat. aq.  $\text{NaHCO}_3$  (150 mL) and extracted with  $\text{Et}_2\text{O}$  (3 x 300 mL). The combined organics were washed with brine (200 mL), dried ( $\text{Na}_2\text{SO}_4$ ) and concentrated to afford a yellow oil. The residue was purified by chromatography (silica gel, 100% hexanes) to afford the title compound (24.7 g, 61%) as a colourless oil.  $\nu_{\text{max}}$  (film)/ $\text{cm}^{-1}$  2958, 1362, 1254;  $\delta_{\text{H}}$  (500 MHz,  $\text{CDCl}_3$ ) 6.16 (1H, dd,  $J$  17.2, 10.8), 5.31-5.25 (1H, m), 4.95 (1H, ddd,  $J$  10.8, 1.6, 0.6), 4.79 (1H, t,  $J$  7.3), 2.10-2.05 (2H, m), 1.41-1.33 (2H, m), 1.00 (9H, s), 0.91 (3H, t,  $J$  7.4), 0.11 (6H, s);  $\delta_{\text{C}}$  (125 MHz,  $\text{CDCl}_3$ ) 148.3 (C), 135.7 (CH), 116.0 (CH), 111.8 ( $\text{CH}_2$ ), 28.2 ( $\text{CH}_2$ ), 26.0 ( $\text{CH}_3$ ), 22.8 ( $\text{CH}_2$ ), 18.5 (C), 13.9 ( $\text{CH}_3$ ),  $-3.7$  ( $\text{CH}_3$ ).

### (*Z*)-*tert*-Butyldimethyl(5-phenylpenta-1,3-dien-3-yloxy)silane, **S2d**

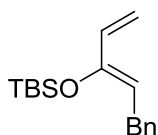

KHMDS (250 mL, 0.91 M in THF, 225 mmol) was added dropwise over 30 min to a solution of enone **S1d** (40.0 g, 250 mmol) and TBSOTf (68.8 mL, 300 mmol) in dry THF (1000 mL) at  $-78\text{ }^\circ\text{C}$  under argon. After the addition was complete, the reaction mixture was stirred at  $-78\text{ }^\circ\text{C}$  for 1.5 h, then quenched with sat. aq.  $\text{NaHCO}_3$  (300 mL), warmed to room temperature and extracted with  $\text{Et}_2\text{O}$  (3 x 500 mL). The combined organics were washed with brine (300 mL), dried ( $\text{Na}_2\text{SO}_4$ ) and concentrated to afford a yellow oil. The residue was purified by chromatography (silica gel, 100% hexanes) to afford the title compound (47.1 g, 76% w.r.t KHMDS) as a colourless oil.  $\nu_{\text{max}}$  (film)/ $\text{cm}^{-1}$  2931, 1359, 1255;  $\delta_{\text{H}}$  (500 MHz,  $\text{CDCl}_3$ ) 7.35-7.21 (5H, m), 6.24 (1H, dd,  $J$  17.1, 10.8), 5.41 (1H, dd,  $J$  17.1, 1.0), 5.08-5.01 (2H,

m), 3.52 (2H, d, *J* 7.3), 1.07 (9H, s), 0.20 (6H, s);  $\delta_c$  (125 MHz, CDCl<sub>3</sub>) 148.9 (C), 141.2 (C), 135.5 (CH), 128.42 (CH), 128.39 (CH), 125.9 (CH), 114.1 (CH), 112.8 (CH<sub>2</sub>), 32.3 (CH<sub>2</sub>), 26.0 (CH<sub>3</sub>), 18.5 (C), -3.5 (CH<sub>3</sub>).

#### General procedure B: Diels-Alder/Schmidt reaction

#### **(8a*S*,9*R*,12a*R*)-9-Methyloctahydrobenzo[*b*]pyrrolo[1,2-*a*]azepine-5,10(1*H*,6*H*)-dione, 3b**

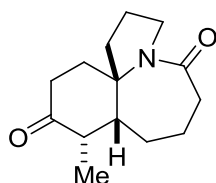

Titanium tetrachloride (1 M in dichloromethane, 100 mmol) was added dropwise to a solution of azide<sup>53</sup> (7.15 g, 40 mmol) and (*Z*)-*tert*-butyldimethyl(penta-1,3-dien-3-yloxy)silane<sup>52</sup> (19.8 g, 100 mmol) in anhydrous dichloromethane (500 mL) at 0 °C under argon. The resulting red/brown solution was stirred at 0 °C for 2 h, then allowed to warm slowly to room temperature overnight. The reaction mixture was quenched with water (100 mL) and stirred at room temperature for 1 h. The organic layer was removed, and the aqueous extracted with dichloromethane (3 x 100 mL). The combined organics were dried (Na<sub>2</sub>SO<sub>4</sub>) and concentrated to afford a brown oil. The residue was purified by chromatography (silica gel, 95:5 ethyl acetate: methanol) to afford the title compound (5.0 g, 53%) as a cream solid foam. A portion of this was recrystallised from hexanes and ethyl acetate to afford colourless needles. Mp 133-135 °C;  $\nu_{\max}$  (film)/cm<sup>-1</sup> 2943, 1708, 1611;  $\delta_H$  (500 MHz, CDCl<sub>3</sub>) 3.87-3.81 (1H, m), 3.29 (1H, ddd, *J* 11.7, 11.7, 7.1), 2.78-2.74 (1H, m), 2.61 (1H, dd, *J* 12.3, 6.4), 2.51 (1H, ddt, *J* 15.0, 6.4, 1.4), 2.37-2.22 (4H, m), 1.97-1.88 (1H, m), 1.88-1.65 (6H, m), 1.39-1.27 (1H, m), 1.08-1.02 (1H, m), 0.88 (3H, d, *J* 6.7);  $\delta_c$  (125 MHz, CDCl<sub>3</sub>) 210.3 (C), 173.8 (C), 66.0 (C), 52.1 (CH), 49.2 (CH<sub>2</sub>), 47.2 (CH), 40.1 (CH<sub>2</sub>), 38.32 (CH<sub>2</sub>), 38.25 (CH<sub>2</sub>), 28.1 (CH<sub>2</sub>), 27.1 (CH<sub>2</sub>), 22.8 (CH<sub>2</sub>), 20.6 (CH<sub>2</sub>), 12.4 (CH<sub>3</sub>); *m/z* (ESI+) found [M+H]<sup>+</sup> 236.1674. C<sub>14</sub>H<sub>22</sub>NO<sub>2</sub><sup>+</sup> requires 236.1645.

#### **(8a*S*,9*R*,12a*R*)-9-Propyloctahydrobenzo[*b*]pyrrolo[1,2-*a*]azepine-5,10(1*H*,6*H*)-dione, 3c**

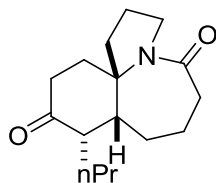

Following general procedure B, reaction with azide (7.0 g, 39.1 mmol) and diene **S2c** (22.1 g, 97.7 mmol) provided the title compound (4.5 g, 44%) as a colourless solid. A portion this was recrystallised from hexanes and ethyl acetate to afford colourless needles. Mp 86.5 – 88.0 °C;  $\nu_{\max}$  (film)/cm<sup>-1</sup> 2954, 1707, 1613;  $\delta_H$  (500 MHz, CDCl<sub>3</sub>) 3.98 (1H, dd, *J* 11.9, 8.4), 3.43 (1H, ddd, *J* 11.9, 11.9, 7.0), 2.76 (1H, dd, *J* 12.2, 6.2), 2.70-2.61 (2H, m), 2.48-2.37 (4H, m), 2.07-1.99 (1H, m), 1.96-1.72 (7H, m), 1.50-1.40 (1H, m), 1.28-1.11 (4H, m), 0.90 (3H, t, *J* 7.2);  $\delta_c$  (125 MHz, CDCl<sub>3</sub>) 210.0 (C), 173.7 (C), 65.9 (C), 52.5 (CH), 50.3 (CH), 49.2 (CH<sub>2</sub>), 40.3 (CH<sub>2</sub>), 38.8 (CH<sub>2</sub>), 38.3 (CH<sub>2</sub>), 29.1 (CH<sub>2</sub>), 28.4

(CH<sub>2</sub>), 27.4 (CH<sub>2</sub>), 22.9 (CH<sub>2</sub>), 20.6 (CH<sub>2</sub>), 20.5 (CH<sub>2</sub>), 14.1 (CH<sub>3</sub>); *m/z* (ESI+) found [M+H]<sup>+</sup> 264.1994. C<sub>16</sub>H<sub>26</sub>NO<sub>2</sub><sup>+</sup> requires 264.1958.

**(8a*S*,9*R*,12a*R*)-9-Benzyloctahydrobenzo[*b*]pyrrolo[1,2-*a*]azepine-5,10(1*H*,6*H*)-dione, 3d**

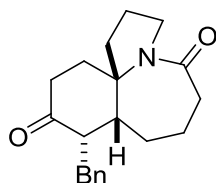

Following general procedure B, reaction with azide (12.3 g, 68.6 mmol) and diene **S2d** (47.1 g, 172 mmol) provided the title compound (11.9 g, 56%) as a colourless solid. A portion this was recrystallised from hexanes and ethyl acetate to afford colourless needles. Mp 117-119 °C;  $\nu_{\max}$  (film)/cm<sup>-1</sup> 2945, 1709, 1611;  $\delta_{\text{H}}$  (500 MHz, CDCl<sub>3</sub>) 7.29-7.26 (2H, m), 7.22-7.18 (1H, m), 7.14-7.11 (2H, m), 3.95-3.90 (1H, m), 3.37-3.31 (1H, m), 3.15 (1H, dd, *J* 14.3, 6.1), 3.06-3.02 (1H, m), 2.72-2.68 (1H, m), 2.63 (1H, dd, *J* 15.0, 6.6), 2.53-2.38 (5H, m), 2.06-2.01 (1H, m), 1.92-1.74 (6H, m), 1.44-1.35 (1H, m), 1.31-1.22 (1H, m);  $\delta_{\text{C}}$  (125 MHz, CDCl<sub>3</sub>) 209.2 (C), 173.6 (C), 139.6 (C), 128.7 (CH), 128.6 (CH), 126.3 (CH), 65.8 (C), 54.6 (CH), 49.3 (CH), 49.2 (CH<sub>2</sub>), 40.2 (CH<sub>2</sub>), 38.6 (CH<sub>2</sub>), 38.3 (CH<sub>2</sub>), 32.1 (CH<sub>2</sub>), 29.1 (CH<sub>2</sub>), 27.3 (CH<sub>2</sub>), 22.7 (CH<sub>2</sub>), 20.5 (CH<sub>2</sub>); *m/z* (ESI+) found [M+H]<sup>+</sup> 312.1982. C<sub>20</sub>H<sub>26</sub>NO<sub>2</sub><sup>+</sup> requires 312.1958.

General procedure D: L-Selectride reduction of ketones

**(8a*S*,10*S*,12a*R*)-10-Hydroxydecahydrobenzo[*b*]pyrrolo[1,2-*a*]azepin-5(1*H*)-one, S3a**

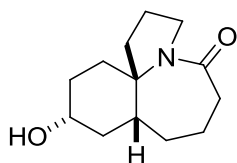

L-Selectride (1M in tetrahydrofuran, 33.9 mL) was added dropwise to a solution of ketone **3a**<sup>54</sup> (3.0 g, 13.6 mmol) in anhydrous tetrahydrofuran (180 mL) at -78 °C under argon. The reaction mixture was stirred at -78 °C for 4 h, then allowed to warm slowly to room temperature overnight. The mixture was then cooled to 0 °C, quenched carefully with 30% aq. H<sub>2</sub>O<sub>2</sub> (15 mL) and 2M NaOH (20 mL), then extracted with dichloromethane (3 x 100 mL). The combined organics were washed with brine (100 mL), dried (Na<sub>2</sub>SO<sub>4</sub>) and concentrated. The crude product was purified by automated column chromatography (40 g silica column, 0% MeOH in CH<sub>2</sub>Cl<sub>2</sub> for 3 min, then 0 to 10% over 10 min, the 10% for 5 min) to afford the title compound (2.73 g, 90%) as a pale yellow oil. A portion was recrystallised from hexanes and ethyl acetate to afford colourless plates. Mp 112.5-114.5 °C;  $\nu_{\max}$  (film)/cm<sup>-1</sup> 3380, 2926, 1592;  $\delta_{\text{H}}$  (500 MHz, CDCl<sub>3</sub>) 4.09-4.06 (1H, m), 3.80-3.75 (1H, m), 3.54-3.47 (1H, m), 2.67-2.58 (2H, m), 2.55-2.45 (1H, m), 2.40-2.36 (1H, m), 2.30 (1H, td, *J* 13.1, 5.3), 1.97 (1H, dt, *J* 9.0, 5.0), 1.94-1.69 (9H, m), 1.49-1.37 (2H, m);  $\delta_{\text{C}}$  (125 MHz, CDCl<sub>3</sub>) 174.5 (C), 66.4 (C), 65.2 (CH),

49.0 (CH<sub>2</sub>), 43.9 (CH), 39.0 (CH<sub>2</sub>), 38.6 (CH<sub>2</sub>), 38.4 (CH<sub>2</sub>), 34.7 (CH<sub>2</sub>), 31.4 (CH<sub>2</sub>), 24.3 (CH<sub>2</sub>), 23.7 (CH<sub>2</sub>), 20.3 (CH<sub>2</sub>); *m/z* (ESI+) found [M+H]<sup>+</sup> 224.1660. C<sub>13</sub>H<sub>22</sub>NO<sub>2</sub><sup>+</sup> requires 224.1645.

**(8a*S*,10*S*,12a*R*)-5-Oxododecahydrobenzo[*b*]pyrrolo[1,2-*a*]azepin-10-yl 4-bromobenzoate, **S6****

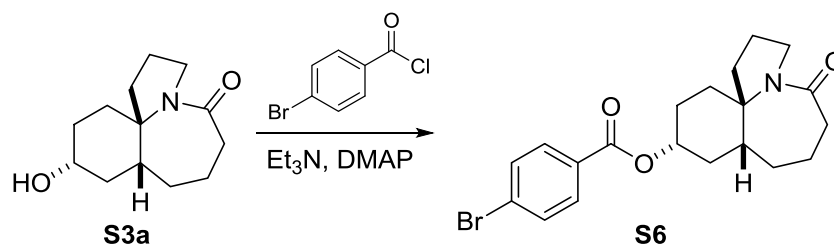

Triethylamine (75  $\mu$ L, 0.54 mmol) was added to a solution of alcohol **S3a** (100 mg, 0.45 mmol), 4-bromobenzoyl chloride (150 mg, 0.67 mmol) and DMAP (66 mg, 0.54 mmol) in anhydrous CH<sub>2</sub>Cl<sub>2</sub> (5 mL) at room temperature under argon. The reaction mixture was stirred for 7.5 h, then water (5 mL) was added. The organic layer was removed and the aqueous extracted with CH<sub>2</sub>Cl<sub>2</sub> (2 x 5 mL). The combined organics were dried (Na<sub>2</sub>SO<sub>4</sub>) and concentrated to afford a yellow oil. The crude product was purified by automated column chromatography (4 g silica column, 0 to 100% EtOAc in hexanes over 15 min) followed by recrystallisation from EtOAc to afford the title compound (130 mg, 71%) as cream plates. Mp 104-107 °C;  $\nu_{\max}$  (film)/cm<sup>-1</sup> 2928, 1711, 1612;  $\delta_{\text{H}}$  (500 MHz, CDCl<sub>3</sub>) 7.90 (2H, d, *J* 8.3), 7.62 (2H, d, *J* 8.3), 5.25 (1H, br s), 3.84-3.78 (1H, m), 3.56-3.47 (1H, m), 2.74-2.66 (1H, m), 2.52-2.35 (3H, m), 2.32-2.23 (1H, m), 2.13 (1H, td, *J* 15.5, 4.4), 2.06-1.94 (3H, m), 1.92-1.70 (6H, m), 1.54-1.44 (2H, m);  $\delta_{\text{C}}$  (125 MHz, CDCl<sub>3</sub>) 174.2 (C), 165.2 (C), 131.9 (CH), 131.0 (CH), 129.5 (C), 128.2 (C), 68.8 (CH), 66.0 (C), 49.2 (CH<sub>2</sub>), 43.5 (CH), 39.0 (CH<sub>2</sub>), 38.6 (CH<sub>2</sub>), 35.7 (CH<sub>2</sub>), 34.4 (CH<sub>2</sub>), 28.5 (CH<sub>2</sub>), 24.7 (CH<sub>2</sub>), 23.7 (CH<sub>2</sub>), 20.3 (CH<sub>2</sub>); *m/z* (ESI+) found [M+H]<sup>+</sup> 406.1023. C<sub>20</sub>H<sub>25</sub>BrNO<sub>3</sub><sup>+</sup> requires 406.1012.

**(8a*S*,9*R*,10*S*,12a*R*)-10-Hydroxy-9-methyldecahydrobenzo[*b*]pyrrolo[1,2-*a*]azepin-5(1*H*)-one, **S3b****

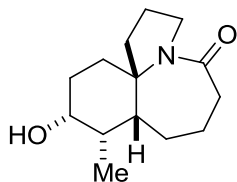

Following general procedure D, reaction with ketone **3b** (2.65 g, 11.3 mmol) and L-Selectride (1.0 M in tetrahydrofuran, 28.2 mL) provided the title compound (2.54 g, 95%) as a pale yellow crystalline solid. Mp 189-191 °C;  $\nu_{\max}$  (film)/cm<sup>-1</sup> 3389, 2932, 1591;  $\delta_{\text{H}}$  (500 MHz, CDCl<sub>3</sub>) 3.85-3.59 (2H, m), 3.41-3.34 (1H, m), 2.62 (1H, ddt, *J* 14.9, 6.9, 1.4), 2.50-2.42 (2H, m), 2.26-2.16 (2H, m), 1.98-1.66 (6H, m), 1.47 (1H, dt, *J* 12.7, 3.1), 1.38-1.24 (2H, m), 1.06 (3H, t, *J* 7.2);  $\delta_{\text{C}}$  (125 MHz, CDCl<sub>3</sub>) 173.9 (C), 68.3 (CH), 67.0 (C), 49.0 (CH), 48.1 (CH<sub>2</sub>), 37.9 (CH<sub>2</sub>), 37.8 (CH<sub>2</sub>), 36.9 (CH), 30.5 (CH<sub>2</sub>), 27.2 (CH<sub>2</sub>), 22.9 (CH<sub>2</sub>), 22.7 (CH<sub>2</sub>), 19.3 (CH<sub>2</sub>), 15.2 (CH<sub>3</sub>); *m/z* (ESI+) found [M+H]<sup>+</sup> 238.1817. C<sub>14</sub>H<sub>24</sub>NO<sub>2</sub><sup>+</sup> requires 238.1802.

**(8a*S*,9*R*,10*S*,12a*R*)-10-Hydroxy-9-propyldecahydrobenzo[*b*]pyrrolo[1,2-*a*]azepin-5(1*H*)-one, S3c**

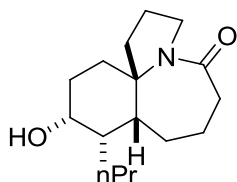

Following general procedure D, reaction with ketone **3c** (1.16 g, 4.4 mmol) and L-Selectride (1.0 M in tetrahydrofuran, 10.9 mL) provided the title compound (1.11 g, 95%) as a pale yellow crystalline solid. Mp 134-135 °C;  $\nu_{\max}$  (film)/ $\text{cm}^{-1}$  3391, 2953, 1593;  $\delta_{\text{H}}$  (500 MHz,  $\text{CDCl}_3$ ) 3.85 – 3.78 (2H, m), 3.43 – 3.36 (1H, m), 2.58 (1H, dd,  $J$  15.0, 6.9), 2.48 – 2.40 (2H, m), 2.28 – 2.18 (3H, m), 1.89 – 1.60 (8H, m), 1.53 – 1.22 (7 H, m), 0.90 (3H, t,  $J$  7.3);  $\delta_{\text{C}}$  (125 MHz,  $\text{CDCl}_3$ ) 174.9 (C), 68.0 (C), 67.8 (CH), 49.1 ( $\text{CH}_2$ ), 48.0 (CH), 43.0 (CH), 39.0 ( $\text{CH}_2$ ), 38.8 ( $\text{CH}_2$ ), 32.0 ( $\text{CH}_2$ ), 31.7 ( $\text{CH}_2$ ), 28.3 ( $\text{CH}_2$ ), 24.4 ( $\text{CH}_2$ ), 23.8 ( $\text{CH}_2$ ), 20.2 ( $\text{CH}_2$ ), 20.1 ( $\text{CH}_2$ ), 14.3 ( $\text{CH}_3$ );  $m/z$  (ESI+) found  $[\text{M}+\text{H}]^+$  266.2134.  $\text{C}_{16}\text{H}_{28}\text{NO}_2^+$  requires 266.2115.

**(8a*S*,9*R*,10*S*,12a*R*)-9-Benzyl-10-hydroxydecahydrobenzo[*b*]pyrrolo[1,2-*a*]azepin-5(1*H*)-one, S3d**

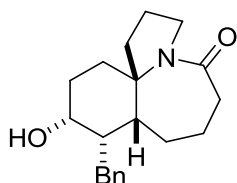

Following general procedure D, reaction with ketone **3d** (2.50 g, 8.0 mmol) and L-Selectride (1.0 M in tetrahydrofuran, 20.1 mL) provided the title compound (2.29 g, 91%) as a colourless solid foam. A portion of this was recrystallised from ethyl acetate and tetrahydrofuran to afford colourless plates. Mp 169-171 °C;  $\nu_{\max}$  (film)/ $\text{cm}^{-1}$  3388, 2926, 1593;  $\delta_{\text{H}}$  (500 MHz,  $\text{CDCl}_3$ ) 7.29-7.26 (2H, m), 7.21-7.17 (3H, m), 3.84-3.74 (2H, m), 3.41-3.34 (1H, m), 2.92 (1H, dd,  $J$  13.4, 8.7), 2.67-2.57 (2H, m), 2.50-2.20 (4H, m), 2.07-1.97 (2H, m), 1.86-1.57 (6H, m), 1.53-1.47 (1H, m), 1.37-1.22 (2H, m);  $\delta_{\text{C}}$  (125 MHz,  $\text{CDCl}_3$ ) 174.9 (C), 140.6 (C), 128.9 (CH), 128.5 (CH), 126.1 (CH), 68.0 (C), 66.5 (CH), 49.1 ( $\text{CH}_2$ ), 48.5 (CH), 45.7 (CH), 38.9 ( $\text{CH}_2$ ), 38.8 ( $\text{CH}_2$ ), 36.5 ( $\text{CH}_2$ ), 32.0 ( $\text{CH}_2$ ), 28.7 ( $\text{CH}_2$ ), 24.3 ( $\text{CH}_2$ ), 23.7 ( $\text{CH}_2$ ), 20.2 ( $\text{CH}_2$ );  $m/z$  (ESI+) found  $[\text{M}+\text{H}]^+$  314.2127.  $\text{C}_{20}\text{H}_{28}\text{NO}_2^+$  requires 314.2115.

General procedure E: Formation of carbonates

**4-Nitrophenyl (8a*S*,10*S*,12a*R*)-5-oxododecahydrobenzo[*b*]pyrrolo[1,2-*a*]azepin-10-yl carbonate, S4a**

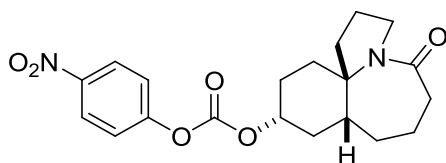

4-Nitrophenylchloroformate (2.88 g, 14.3 mmol) was added in one portion to a solution of alcohol **S3a** (2.13 g, 9.54 mmol) and pyridine (1.54 mL, 19.1 mmol) in anhydrous CH<sub>2</sub>Cl<sub>2</sub> (50 mL) at 0 °C under argon. The resulting suspension was stirred at room temperature for 1.5 h, then diluted with CH<sub>2</sub>Cl<sub>2</sub> (200 mL) and washed quickly with 1M HCl (50 mL) and brine (50 mL), dried (Na<sub>2</sub>SO<sub>4</sub>) and concentrated to afford a colourless solid foam. The crude product was purified by automated column chromatography (40 g silica column, 0 to 100% EtOAc in hexanes over 5 min, then 100% EtOAc for 10 min) to afford the title compound (2.81 g, 76%) as a white amorphous solid. Mp 159-160 °C;  $\nu_{\max}$  (film)/cm<sup>-1</sup> 2946, 1760, 1614;  $\delta_{\text{H}}$  (500 MHz, CDCl<sub>3</sub>) 8.45-8.18 (2H, m), 7.49-7.32 (2H, m), 5.03-4.86 (1H, m), 3.86-3.78 (1H, m), 3.56-3.49 (1H, m), 2.70 (1H, dd, *J* 15.0, 6.7), 2.48 (1H, t, *J* 13.3), 2.44-2.31 (2H, m), 2.27 (1H, td, *J* 14.1, 3.5), 2.14-2.06 (2H, m), 2.06-1.91 (3H, m), 1.89-1.72 (5H, m), 1.54-1.44 (2H, m);  $\delta_{\text{C}}$  (125 MHz, CDCl<sub>3</sub>) 174.3 (C), 155.5 (C), 151.8 (C), 145.4 (C), 125.3 (CH), 121.9 (CH), 74.0 (CH), 65.8 (C), 49.1 (CH<sub>2</sub>), 43.3 (CH), 39.0 (CH<sub>2</sub>), 38.4 (CH<sub>2</sub>), 35.5 (CH<sub>2</sub>), 34.0 (CH<sub>2</sub>), 28.3 (CH<sub>2</sub>), 24.5 (CH<sub>2</sub>), 23.6 (CH<sub>2</sub>), 20.3 (CH<sub>2</sub>); *m/z* (ESI+) found [M+H]<sup>+</sup> 389.1727. C<sub>20</sub>H<sub>25</sub>N<sub>2</sub>O<sub>6</sub><sup>+</sup> requires 389.1702.

**(8a*S*,9*R*,10*S*,12a*R*)-9-Methyl-5-oxododecahydrobenzo[*b*]pyrrolo[1,2-*a*]azepin-10-yl 4-nitrophenyl carbonate, S4b**

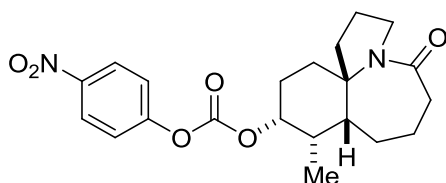

Following general procedure E, reaction of alcohol **S3b** (2.90 g, 12.2 mmol) provided the title compound (2.71 g, 55%) as a cream solid foam.  $\nu_{\max}$  (film)/cm<sup>-1</sup> 2956, 1759, 1612;  $\delta_{\text{H}}$  (500 MHz, CDCl<sub>3</sub>) 8.29-8.26 (2H, m), 7.40-7.37 (2H, m), 4.90 (1H, br s), 3.88-3.83 (1H, m), 3.48-3.41 (1H, m), 2.66 (1H, dd, *J* 15.1, 7.0), 2.48-2.40 (2H, m), 2.24-2.12 (2H, m), 2.08-2.02 (1H, m), 1.99-1.68 (7H, m), 1.55 (1H, ddd, *J* 12.0, 3.7, 3.7), 1.47-1.42 (1H, m), 1.40-1.32 (1H, m), 1.07 (3H, d, *J* 7.1);  $\delta_{\text{C}}$  (125 MHz, CDCl<sub>3</sub>) 174.6 (C), 155.6 (C), 152.3 (C), 145.4 (C), 125.3 (CH), 121.9 (CH), 77.9 (CH), 67.2 (C), 49.5 (CH), 49.1 (CH<sub>2</sub>), 39.0 (CH<sub>2</sub>), 38.8 (CH<sub>2</sub>), 37.2 (CH), 28.5 (CH<sub>2</sub>), 27.7 (CH<sub>2</sub>), 24.0 (CH<sub>2</sub>), 23.5 (CH<sub>2</sub>), 20.2 (CH<sub>2</sub>), 15.9 (CH<sub>3</sub>); *m/z* (ESI+) found [M+H]<sup>+</sup> 403.1884. C<sub>21</sub>H<sub>27</sub>N<sub>2</sub>O<sub>6</sub><sup>+</sup> requires 403.1864.

**4-Nitrophenyl (8a*S*,9*R*,10*S*,12a*R*)-5-oxo-9-propyldodecahydrobenzo[*b*]pyrrolo[1,2-*a*]azepin-10-yl carbonate, S4c**

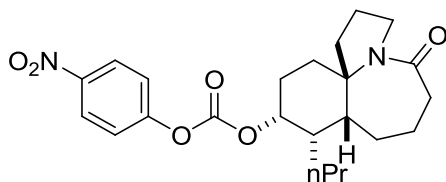

Following general procedure E, reaction of alcohol **S3c** (1.11 g, 4.2 mmol) provided the title compound (1.20 g, 67%) as a colourless solid foam.  $\nu_{\max}$  (film)/ $\text{cm}^{-1}$  2947, 1761, 1614;  $\delta_{\text{H}}$  (500 MHz,  $\text{CDCl}_3$ ) 8.35-8.28 (2H, m), 7.45-7.38 (2H, m), 5.01 (1H, br s), 4.14 (1H, d,  $J$  7.1), 3.91 (1H, dd,  $J$  12.6, 7.2), 3.49 (1H, dd,  $J$  7.8, 2.7), 2.76 (1H, dd,  $J$  15.1, 6.9), 2.49 (2H, dd 16.2, 10.8), 2.22 (1H, dd,  $J$  13.6, 4.7), 2.13-1.80 (10H, m), 1.80-1.67 (3H, m), 1.65 (1H, s), 1.54-1.32 (6H, m), 1.28 (1H, t,  $J$  7.1), 0.99-0.91 (3H, m);  $\delta_{\text{C}}$  (125 MHz,  $\text{CDCl}_3$ ) 174.8 (C), 155.6 (C), 152.2 (C), 125.3 (CH), 121.9 (CH), 76.7 (CH), 67.4 (C), 49.3 ( $\text{CH}_2$ ), 47.3 (CH), 42.2 (CH), 39.0 ( $\text{CH}_2$ ), 38.6 ( $\text{CH}_2$ ), 31.5 ( $\text{CH}_2$ ), 28.6 ( $\text{CH}_2$ ), 27.7 ( $\text{CH}_2$ ), 24.4 ( $\text{CH}_2$ ), 23.5 ( $\text{CH}_2$ ), 20.2 ( $\text{CH}_2$ ), 19.9 ( $\text{CH}_2$ ), 14.2 ( $\text{CH}_3$ );  $m/z$  (ESI+) found  $[\text{M}+\text{H}]^+$  431.2202.  $\text{C}_{23}\text{H}_{31}\text{N}_2\text{O}_6^+$  requires 431.2177.

**(8aS,9R,10S,12aR)-9-Benzyl-5-oxododecahydrobenzo[*b*]pyrrolo[1,2-*a*]azepin-10-yl 4-nitrophenyl carbonate, S4d**

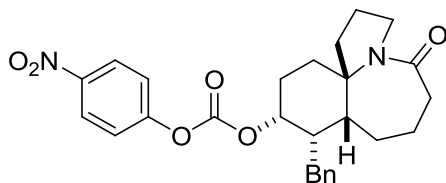

Following general procedure E, reaction of alcohol **S3d** (2.19 g, 7.0 mmol) provided the title compound (2.49 g, 74%) as a colourless amorphous solid. Mp 211-213 °C;  $\nu_{\max}$  (film)/ $\text{cm}^{-1}$  2958, 1760, 1611;  $\delta_{\text{H}}$  (500 MHz,  $\text{CDCl}_3$ ) 8.35-8.32 (2H, m), 7.47-7.43 (2H, m), 7.34-7.31 (2H, m), 7.27-7.22 (1H, m), 7.17-7.13 (2H, m), 4.84 (1H, br s), 3.89-3.84 (1H, m), 3.45-3.39 (1H, m), 2.87 (1H, dd,  $J$  13.6, 8.1), 2.73-2.66 (2H, m), 2.51-2.43 (2H, m), 2.34-2.29 (1H, m), 2.23 (1H, ddd,  $J$  13.6, 13.6, 4.6), 2.13-2.02 (3H, m), 1.92-1.59 (6H, m), 1.48 (1H, dd,  $J$  13.6, 5.1), 1.40-1.31 (1H, m);  $\delta_{\text{C}}$  (125 MHz,  $\text{CDCl}_3$ ) 174.4 (C), 155.6 (C), 152.0 (C), 145.4 (C), 139.1 (C), 128.8 (CH), 128.7 (CH), 126.7 (CH), 125.4 (CH), 121.9 (CH), 76.0 (CH), 67.0 (C), 49.1 ( $\text{CH}_2$ ), 47.6 (CH), 44.9 (CH), 39.0 ( $\text{CH}_2$ ), 38.8 ( $\text{CH}_2$ ), 36.0 ( $\text{CH}_2$ ), 28.3 ( $\text{CH}_2$ ), 28.0 ( $\text{CH}_2$ ), 24.4 ( $\text{CH}_2$ ), 23.4 ( $\text{CH}_2$ ), 20.2 ( $\text{CH}_2$ );  $m/z$  (ESI+) found  $[\text{M}+\text{H}]^+$  479.2169.  $\text{C}_{27}\text{H}_{31}\text{N}_2\text{O}_6^+$  requires 479.2177.

General procedure F: Reductive amination with ammonium acetate









concentrated. The resulting oil was dissolved in anhydrous benzene (100 mL) and to the solution was added lithium tetrafluoroborate (0.10 g, 1.0 mmol). The solution was heated at reflux for 3 h, then cooled to room temperature and concentrated to an oil. The crude product was purified by automated column chromatography (40 g silica column, 0 to 10% EtOAc in hexanes over 30 min) to afford the title compound (2.2 g, 59%) as a colorless oil as a single diastereomer. The  $^1\text{H}$  and  $^{13}\text{C}$  NMR data closely matched that previously reported<sup>57</sup>.

#### (4*S*,7*S*)-7-methylspiro[3.5]nonan-1-one, 6b

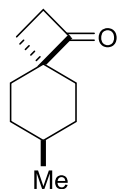

Following general procedure G, reaction with 4-methylcyclohexanone (1.8 mL, 15 mmol) provided the title compound (1.3 g, 62%) as a colorless viscous oil as a single diastereomer.  $^1\text{H}$  NMR (400 MHz,  $\text{CDCl}_3$ )  $\delta$  2.92 – 2.85 (m, 2H), 2.00 – 1.89 (m, 2H), 1.70 (t,  $J = 8.5, 8.5$  Hz, 2H), 1.59 – 1.48 (m, 2H), 1.46 – 1.36 (m, 2H), 1.35 – 1.24 (m, 3H), 0.88 (d,  $J = 5.9$  Hz, 3H).  $^{13}\text{C}$  NMR (100 MHz,  $\text{CDCl}_3$ )  $\delta$  216.3, 65.1, 41.3, 33.5, 32.1, 25.2;  $m/z$  (ESI+) found  $[\text{M}+\text{H}]^+$  153.1354.  $\text{C}_{10}\text{H}_{17}\text{O}^+$  requires 153.1274.

#### (4*S*,7*S*)-7-propylspiro[3.5]nonan-1-one, 6c

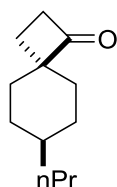

Following general procedure G, reaction with 4-propylcyclohexanone (2.0 mL, 13 mmol) provided the title compound (1.6 g, 74%) as a colorless oil as a single diastereomer.  $^1\text{H}$  NMR (400 MHz,  $\text{CDCl}_3$ )  $\delta$  2.83 – 2.74 (m, 2H), 1.90 – 1.79 (m, 2H), 1.67 – 1.56 (m, 2H), 1.54 – 1.44 (m, 2H), 1.35 – 1.25 (m, 2H), 1.24 – 1.12 (m, 4H), 1.12 – 1.00 (m, 3H), 0.75 (t,  $J = 7.1, 7.1$  Hz, 3H).  $^{13}\text{C}$  NMR (101 MHz,  $\text{CDCl}_3$ )  $\delta$  215.8, 65.0, 40.8, 38.5, 36.2, 32.9, 29.6, 24.7, 20.0, 14.4;  $m/z$  (ESI+) found  $[\text{M}+\text{H}]^+$  181.1581.  $\text{C}_{12}\text{H}_{21}\text{O}^+$  requires 181.1587.

#### (4*S*,7*S*)-7-phenylspiro[3.5]nonan-1-one, 6d

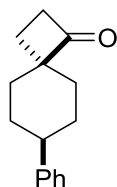

Following general procedure G, reaction with 4-phenylcyclohexanone (3.0 g, 17 mmol) provided the title compound (2.4 g, 70%, 20:1 dr) as a colorless solid.  $^1\text{H}$  NMR (400 MHz,  $\text{CDCl}_3$ )  $\delta$  7.32 – 7.20 (m, 4H), 7.20 – 7.13 (m, 1H), 3.01 – 2.89 (m, 2H), 2.45 (tt,  $J = 12.0, 12.0, 3.6, 3.6$  Hz, 1H), 2.17 – 2.04 (m, 2H), 1.99 – 1.83 (m, 2H), 1.82 – 1.71 (m, 4H), 1.58 (td,  $J = 13.3, 13.3, 3.8$  Hz, 2H).  $^{13}\text{C}$  NMR (126 MHz, DMSO)  $\delta$  214.9, 146.7, 128.3, 126.5, 125.9, 63.2, 42.4, 40.5, 32.7, 30.7, 24.1;  $m/z$  (ESI+) found  $[\text{M}+\text{H}]^+$  215.1430.  $\text{C}_{15}\text{H}_{19}\text{O}^+$  requires 215.1430.

**(4*S*,7*S*)-7-(*p*-tolyl)spiro[3.5]nonan-1-one, 6e**

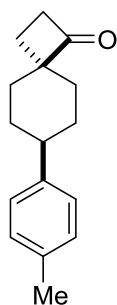

Following general procedure G, reaction with 4-tolylcyclohexanone<sup>58</sup> (1.9 g, 10 mmol) provided the title compound (1.6 g, 72%, 7:1 dr) as a colorless solid.  $^1\text{H}$  NMR (400 MHz,  $\text{CDCl}_3$ )  $\delta$  7.15 – 7.05 (m, 3H), 2.95 (t,  $J = 8.4, 8.4$  Hz, 1H), 2.40 (tt,  $J = 12.0, 12.0, 3.6, 3.6$  Hz, 1H), 2.29 (s, 2H), 2.10 (d,  $J = 13.8$  Hz, 2H), 1.94 – 1.80 (m, 2H), 1.80 – 1.71 (m, 3H), 1.61 – 1.52 (m, 2H).  $^{13}\text{C}$  NMR (100 MHz,  $\text{CDCl}_3$ )  $\delta$  143.9, 135.4, 129.0, 126.8, 64.1, 43.2, 40.8, 33.7, 31.1, 24.7, 20.9;  $m/z$  (ESI+) found  $[\text{M}+\text{H}]^+$  229.1577.  $\text{C}_{16}\text{H}_{21}\text{O}^+$  requires 229.1587.

**(4*s*,7*s*)-7-(*o*-tolyl)spiro[3.5]nonan-1-one, 6f**

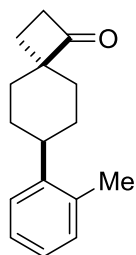

Following general procedure G, reaction with 4-*o*-tolylcyclohexanone<sup>59</sup> (4.0 g, 20.0 mmol) provided the title compound (3.1 g, 72%) as a colorless solid as a single diastereomer.  $^1\text{H}$  NMR (400 MHz,  $\text{CDCl}_3$ )  $\delta$  7.27 (dd,  $J = 7.7, 0.8$  Hz, 1H), 7.16 (td,  $J = 7.5, 1.8$  Hz, 1H), 7.12 – 7.03 (m, 2H), 2.96 (t,  $J = 8.4$  Hz, 2H), 2.65 (tt,  $J = 12.1, 3.3$  Hz, 1H), 2.31 (s, 3H), 2.17 – 2.08 (m, 2H), 1.88 (ddd,  $J = 25.5, 13.3, 3.4$

Hz, 2H), 1.78 (t,  $J = 8.4$  Hz, 2H), 1.69 (dd,  $J = 13.8, 3.3$  Hz, 2H), 1.65 – 1.56 (m, 2H).  $^{13}\text{C}$  NMR (101 MHz,  $\text{CDCl}_3$ )  $\delta$  215.3, 144.7, 134.9, 130.1, 126.2, 125.8, 125.7, 64.2, 40.9, 39.1, 33.9, 30.2, 24.8, 19.4;  $m/z$  (ESI+) found  $[\text{M}+\text{H}]^+$  229.1557.  $\text{C}_{16}\text{H}_{21}\text{O}^+$  requires 229.1587.

**(4*S*,7*S*)-7-(4-methoxyphenyl)spiro[3.5]nonan-1-one, 6g**

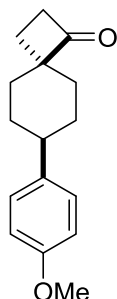

Following general procedure G, reaction with 4-methoxyphenylcyclohexanone<sup>58</sup> (1.0 g, 4.9 mmol) provided the title compound (0.89 g, 78%) as a colorless solid as a single diastereomer.  $^1\text{H}$  NMR (400 MHz,  $\text{CDCl}_3$ )  $\delta$  7.14 (d,  $J = 8.7$  Hz, 2H), 6.82 (d,  $J = 8.7$  Hz, 2H), 3.77 (s, 3H), 2.95 (t,  $J = 8.4, 8.4$  Hz, 2H), 2.39 (tt,  $J = 11.9, 11.9, 3.6, 3.6$  Hz, 1H), 2.09 (d,  $J = 13.7$  Hz, 2H), 1.97 – 1.69 (m, 6H), 1.68 – 1.48 (m, 2H).  $^{13}\text{C}$  NMR (101 MHz,  $\text{CDCl}_3$ )  $\delta$  215.6, 158.0, 139.3, 127.9, 113.9, 64.3, 55.4, 42.9, 41.0, 33.9, 31.4, 24.9;  $m/z$  (ESI+) found  $[\text{M}+\text{H}]^+$  245.1551.  $\text{C}_{16}\text{H}_{21}\text{O}_2^+$  requires 245.1536.

**(4*S*,7*S*)-7-(4-chlorophenyl)spiro[3.5]nonan-1-one, 6h**

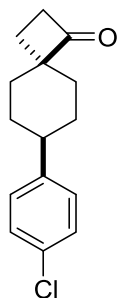

Following general procedure G, reaction with 4-chlorophenylcyclohexanone<sup>60</sup> (1.6 g, 7.7 mmol) provided the title compound (1.2 g, 67%) as a colorless solid.  $^1\text{H}$  NMR (500 MHz, DMSO)  $\delta$  7.40 – 7.27 (m, 2H), 7.27 – 7.13 (m, 2H), 3.08 – 2.86 (m, 2H), 2.50 – 2.44 (m, 1H), 2.06 (d,  $J = 13.8$  Hz, 2H), 1.76 – 1.70 (m, 3H), 1.70 – 1.64 (m, 3H), 1.59 – 1.50 (m, 2H).  $^{13}\text{C}$  NMR (126 MHz, DMSO)  $\delta$  214.9, 145.6, 130.4, 128.4, 128.2, 63.1, 41.7, 40.5, 32.6, 30.5, 24.0;  $m/z$  (ESI+) found  $[\text{M}+\text{H}]^+$  249.1048.  $\text{C}_{15}\text{H}_{18}\text{ClO}^+$  requires 249.1041.

## General procedure H: Azido Schmidt reaction with cyclobutanones **6**

### 1-(2-Hydroxyethyl)-1-azaspiro[4.5]decan-2-one, **8aa**

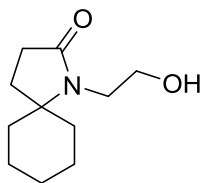

Boron trifluoride etherate (2.3 mL, 27 mmol) was added to a solution of cyclobutanone **6a** (0.75 g, 5.4 mmol) in dichloromethane (40 mL) at  $-78^{\circ}\text{C}$  under argon. The mixture was stirred at  $-78^{\circ}\text{C}$  for 30 min then a solution of azidoalcohol **7a** (1.4 g, 16 mmol) in dichloromethane (10 mL) was added. The solution was stirred at  $-78^{\circ}\text{C}$  for 3 h then allowed to warm to room temperature and stirred for an additional 12 h. The reaction was then concentrated on a rotary evaporator and the resulting oil was dissolved in 15% aqueous potassium hydroxide solution and stirred for 30 min, then extracted with dichloromethane (x 3). The combined organics were washed with water, dried ( $\text{MgSO}_4$ ) and concentrated. The crude product was purified by automated column chromatography (40 g silica column, 0 to 100% EtOAc in hexanes over 30 min) to afford the title compound (0.74 g, 70%) as a colorless viscous oil.  $^1\text{H}$  NMR (400 MHz,  $\text{CDCl}_3$ )  $\delta$  4.17 (t,  $J = 5.3$  Hz, 1H), 3.65 (q,  $J = 5.1$  Hz, 2H), 3.34 – 3.20 (m, 2H), 2.33 (t,  $J = 8.1$  Hz, 2H), 1.89 (t,  $J = 8.1$  Hz, 2H), 1.72 – 1.57 (m, 3H), 1.44 (dd,  $J = 8.9, 3.0$  Hz, 4H), 1.33 (ddt,  $J = 16.3, 8.1, 4.3$  Hz, 2H), 1.03 (qt,  $J = 12.9, 3.7$  Hz, 1H).  $^{13}\text{C}$  NMR (101 MHz,  $\text{CDCl}_3$ )  $\delta$  177.3, 64.6, 63.8, 43.0, 35.1, 29.2, 29.1, 25.0, 22.9.

### (5*R*,8*S*)-1-(2-Hydroxyethyl)-8-propyl-1-azaspiro[4.5]decan-2-one, **8ca**

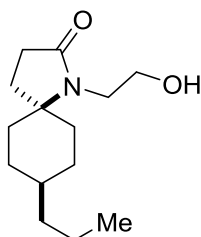

Following general procedure H, reaction with cyclobutanone **6c** (1.2 g, 6.7 mmol) and azidoalcohol **7a** (1.7 g, 20 mmol) provided the title compound (1.1 g, 68%) as a colorless oil.  $^1\text{H}$  NMR (400 MHz,  $\text{CDCl}_3$ )  $\delta$  4.31 (t,  $J = 5.0, 5.0$  Hz, 1H), 3.58 (q,  $J = 5.2, 5.2, 5.1$  Hz, 2H), 3.21 (t,  $J = 5.5, 5.5$  Hz, 2H), 2.25 (t,  $J = 8.1, 8.1$  Hz, 2H), 1.84 (t,  $J = 8.1, 8.1$  Hz, 2H), 1.68 – 1.35 (m, 7H), 1.31 – 1.04 (m, 6H), 0.79 (t,  $J = 7.0, 7.0$  Hz, 3H).  $^{13}\text{C}$  NMR (100 MHz,  $\text{CDCl}_3$ )  $\delta$  176.8, 64.6, 62.9, 42.8, 32.4, 30.6, 29.5, 29.2, 29.0, 26.2, 20.8, 14.2;  $m/z$  (ESI+) found  $[\text{M}+\text{H}]^+$  240.1966.  $\text{C}_{14}\text{H}_{26}\text{NO}_2^+$  requires 240.1955.

**(5S,8S)-1-(2-Hydroxyethyl)-8-phenyl-1-azaspiro[4.5]decan-2-one, 8da**

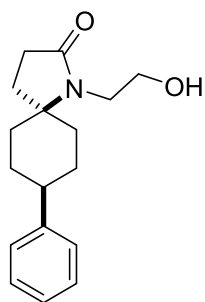

Following general procedure H, reaction with cyclobutanone **6d** (1.5 g, 7.0 mmol) and azidoalcohol **7a** (1.7 g, 21 mmol) provided the title compound (1.7 g, 87%) as a colorless oil.  $^1\text{H}$  NMR (500 MHz, DMSO)  $\delta$  7.43 – 7.31 (m, 4H), 7.20 (td,  $J = 7.3, 0.4$  Hz, 1H), 4.69 (br s, 1H), 3.28 (t,  $J = 6.9$  Hz, 2H), 2.99 – 2.90 (m, 3H), 2.25 – 2.11 (m, 4H), 1.95 – 1.85 (m, 4H), 1.63 (td,  $J = 13.0, 3.6$  Hz, 2H), 1.37 – 1.29 (m, 2H).  $^{13}\text{C}$  NMR (126 MHz, DMSO)  $\delta$  174.1, 143.4, 128.4, 127.2, 125.6, 62.6, 59.1, 41.9, 34.9, 30.7, 29.6, 28.7, 26.3;  $m/z$  (ESI+) found  $[\text{M}+\text{H}]^+$  274.1806.  $\text{C}_{17}\text{H}_{24}\text{NO}_2^+$  requires 274.1798.

**(5S,8S)-1-(2-Hydroxyethyl)-8-(p-tolyl)-1-azaspiro[4.5]decan-2-one, 8ea**

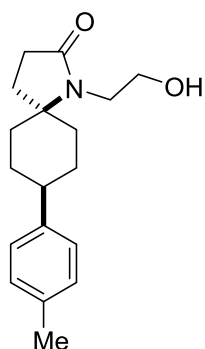

Following general procedure H, reaction with cyclobutanone **6e** (800 mg, 3.5 mmol) and azidoalcohol **7a** (900 mg, 10.5 mmol) provided the title compound (860 mg, 85%) as a colorless oil.  $^1\text{H}$  NMR (500 MHz, DMSO)  $\delta$  7.28 (d,  $J = 8.0$  Hz, 2H), 7.15 (d,  $J = 7.9$  Hz, 2H), 4.68 (br s, 1H), 3.28 (d,  $J = 7.1$  Hz, 2H), 2.91 (t,  $J = 7.2$  Hz, 3H), 2.28 (s, 3H), 2.21 (t,  $J = 7.9$  Hz, 2H), 2.18 – 2.09 (m, 2H), 1.98 – 1.77 (m, 3H), 1.67 – 1.54 (m, 2H), 1.31 (d,  $J = 13.2$  Hz, 2H).  $^{13}\text{C}$  NMR (126 MHz, DMSO)  $\delta$  174.0, 140.1, 134.4, 129.0, 127.1, 62.7, 59.1, 41.8, 34.4, 30.5, 29.5, 28.7, 26.2, 20.5;  $m/z$  (ESI+) found  $[\text{M}+\text{H}]^+$  288.1968.  $\text{C}_{18}\text{H}_{26}\text{NO}_2^+$  requires 288.1955.



**(5*S*,8*S*)-1-(2-Hydroxyethyl)-8-(4-methoxyphenyl)-1-azaspiro[4.5]decan-2-one, 8ga and (5*S*,8*S*)-2-(2-Hydroxyethyl)-8-(4-methoxyphenyl)-2-azaspiro[4.5]decan-1-one, 9ga**

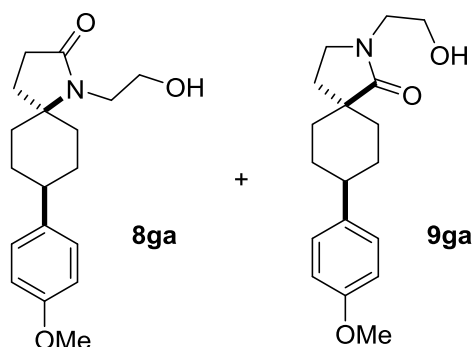

Following general procedure H, reaction with cyclobutanone **6g** (1.0 g, 4.1 mmol) and azidoalcohol **7a** (1.1 g, 12.3 mmol) provided the title compounds **8ga** (930 mg, 75%) and **9ga** (120 mg, 10%) as colorless oils.

**8ga**:  $^1\text{H NMR}$  (500 MHz, DMSO)  $\delta$  7.30 (d,  $J = 8.4$  Hz, 2H), 6.93 – 6.88 (m, 2H), 4.69 (t,  $J = 5.7$  Hz, 1H), 3.74 (s, 3H), 3.30–3.26 (m, 2H), 2.97 – 2.85 (m, 3H), 2.21 (t,  $J = 7.9$  Hz, 2H), 2.16 – 2.05 (m, 2H), 1.97 – 1.81 (m, 4H), 1.62 (td,  $J = 12.9, 12.9, 3.5$  Hz, 2H), 1.30 (d,  $J = 13.2$  Hz, 2H).  $^{13}\text{C NMR}$  (100 MHz, DMSO)  $\delta$  174.0, 157.0, 134.9, 128.1, 113.6, 62.6, 59.0, 54.9, 41.8, 34.0, 30.4, 29.5, 28.7, 26.3;  $m/z$  (ESI+) found  $[\text{M}+\text{H}]^+$  304.1885.  $\text{C}_{18}\text{H}_{26}\text{NO}_3^+$  requires 304.1913.

**9ga**:  $^1\text{H NMR}$  (500 MHz, DMSO)  $\delta$  7.30 (d,  $J = 8.3$  Hz, 2H), 6.92 – 6.86 (m, 2H), 4.69 (s, 1H), 3.78 – 3.66 (m, 3H), 3.31 – 3.25 (m, 3H), 2.99 – 2.85 (m, 3H), 2.21 (t,  $J = 7.9$  Hz, 2H), 2.12 (dd,  $J = 14.1, 2.6$  Hz, 2H), 1.97 – 1.81 (m, 3H), 1.62 (td,  $J = 12.9, 3.5$  Hz, 2H), 1.30 (d,  $J = 13.2$  Hz, 2H).  $^{13}\text{C NMR}$  (126 MHz, DMSO)  $\delta$  174.0, 157.1, 134.9, 128.2, 113.7, 62.7, 59.1, 54.9, 41.8, 34.0, 30.5, 29.5, 28.7, 26.4;  $m/z$  (ESI+) found  $[\text{M}+\text{H}]^+$  304.1910.  $\text{C}_{18}\text{H}_{26}\text{NO}_3^+$  requires 304.1913.

**(5*S*,8*S*)-8-(4-Chlorophenyl)-1-(2-hydroxyethyl)-1-azaspiro[4.5]decan-2-one, 8ha and (5*S*,8*S*)-8-(4-chlorophenyl)-2-(2-hydroxyethyl)-2-azaspiro[4.5]decan-1-one, 9ha**

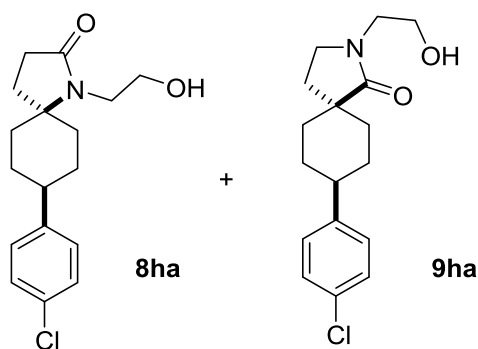

Following general procedure H, reaction with cyclobutanone **6h** (500 mg, 2.0 mmol) and azidoalcohol **7a** (500 mg, 6.0 mmol) provided the title compounds **8ha** (450 mg, 72%) and **9ha** (40 mg, 7%) as colorless oils.

**8ha:**  $^1\text{H}$  NMR (500 MHz, DMSO)  $\delta$  7.49 – 7.31 (m, 4H), 4.67 (t,  $J$  = 5.8 Hz, 1H), 3.31 – 3.24 (m, 2H), 3.00 – 2.85 (m, 3H), 2.22 (t,  $J$  = 7.9 Hz, 2H), 2.13 (d,  $J$  = 11.6 Hz, 2H), 1.98 – 1.82 (m, 4H), 1.68 – 1.51 (m, 2H), 1.32 (d,  $J$  = 13.3 Hz, 2H).  $^{13}\text{C}$  NMR (126 MHz, DMSO)  $\delta$  174.1, 142.3, 130.2, 129.3, 128.2, 62.6, 59.1, 41.9, 34.4, 30.5, 29.5, 28.7, 26.1;  $m/z$  (ESI+) found  $[\text{M}+\text{H}]^+$  308.1402.  $\text{C}_{17}\text{H}_{23}\text{ClNO}_2^+$  requires 308.1409.

**9ha:**  $^1\text{H}$  NMR (500 MHz, DMSO)  $\delta$  7.38 – 7.31 (m, 2H), 7.29 – 7.21 (m, 2H), 4.70 (t,  $J$  = 5.2 Hz, 1H), 3.47 (dd,  $J$  = 10.8, 5.6 Hz, 2H), 3.35 (d,  $J$  = 4.7 Hz, 2H), 3.21 (t,  $J$  = 5.9 Hz, 2H), 2.54 (dd,  $J$  = 7.9, 3.6 Hz, 1H), 2.16 (qd,  $J$  = 12.7, 3.5 Hz, 2H), 1.84 (d,  $J$  = 13.8 Hz, 2H), 1.76 (t,  $J$  = 6.8 Hz, 2H), 1.64 – 1.51 (m, 2H), 1.41 (td,  $J$  = 13.2, 3.8 Hz, 2H);  $^{13}\text{C}$  NMR (126 MHz, DMSO)  $\delta$  177.6, 146.1, 130.2, 128.6, 128.2, 58.6, 44.6, 43.9, 41.7, 41.1, 34.6, 33.7, 28.9;  $m/z$  (ESI+) found  $[\text{M}+\text{H}]^+$  308.1420.  $\text{C}_{17}\text{H}_{23}\text{ClNO}_2^+$  requires 308.1417.

### 1-(3-hydroxypropyl)-1-azaspiro[4.5]decan-2-one, **8ab**

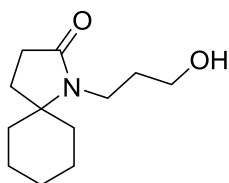

Following general procedure H, reaction with cyclobutanone **6a** (500 mg, 2.0 mmol) and azidoalcohol **7b** (1.8 g, 17.4 mmol) provided the title compound (430 mg, 35%) as a colorless oil.  $^1\text{H}$  NMR (500 MHz, DMSO)  $\delta$  4.70 (t,  $J$  = 5.7 Hz, 1H), 3.43 – 3.33 (m, 3H), 3.10 (t,  $J$  = 7.2 Hz, 2H), 2.18 (t,  $J$  = 8.0 Hz, 2H), 1.81 (t,  $J$  = 8.0 Hz, 2H), 1.68 – 1.60 (m, 2H), 1.56 (dd,  $J$  = 11.7, 5.2 Hz, 2H), 1.51 (dd,  $J$  = 13.0, 3.9 Hz, 2H), 1.42 – 1.26 (m, 4H), 1.15 – 1.01 (m, 1H).  $^{13}\text{C}$  NMR (126 MHz, DMSO)  $\delta$  174.0, 63.0, 59.5, 41.4, 40.7, 34.5, 28.7, 28.4, 24.5, 22.6;  $m/z$  (ESI+) found  $[\text{M}+\text{H}]^+$  212.1650.  $\text{C}_{12}\text{H}_{22}\text{NO}_2^+$  requires 212.1642.

### (5*S*,8*S*)-1-(3-Hydroxypropyl)-8-methyl-1-azaspiro[4.5]decan-2-one, **8bb** and (5*S*,8*S*)-2-(3-hydroxypropyl)-8-methyl-2-azaspiro[4.5]decan-1-one, **9bb**

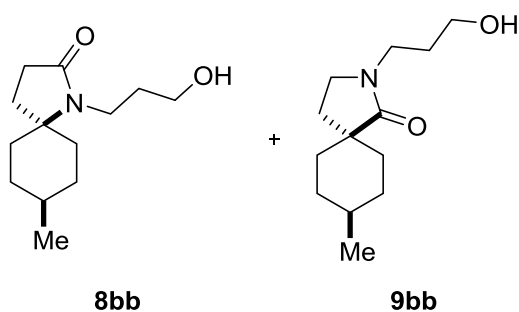

Following general procedure H, reaction with cyclobutanone **6b** (750 mg, 4.9 mmol) and azidoalcohol **7b** (1.5 g, 15 mmol) provided the title compounds **8bb** (440 mg, 40%) and **9bb** (500 mg, 45%) as colorless oils.

**8bb:**  $^1\text{H}$  NMR (400 MHz,  $\text{CDCl}_3$ )  $\delta$  3.61 – 3.42 (m, 2H), 3.38 – 3.25 (m, 2H), 2.33 (t,  $J = 7.9$  Hz, 2H), 1.87 (dd,  $J = 9.9, 6.1$  Hz, 3H), 1.78 (td,  $J = 13.2, 3.9$  Hz, 2H), 1.69 – 1.53 (m, 5H), 1.51 – 1.39 (m, 2H), 1.19 (d,  $J = 12.9$  Hz, 2H), 0.95 (d,  $J = 7.2$  Hz, 3H).  $^{13}\text{C}$  NMR (101 MHz,  $\text{CDCl}_3$ )  $\delta$  176.5, 65.1, 58.2, 35.2, 33.2, 29.21, 29.20, 29.1, 28.3, 25.6, 17.0;  $m/z$  (ESI+) found  $[\text{M}+\text{H}]^+$  226.1778.  $\text{C}_{13}\text{H}_{24}\text{NO}_2^+$  requires 226.1798.

**9bb:**  $^1\text{H}$  NMR (400 MHz,  $\text{CDCl}_3$ )  $\delta$  3.71 (s, 1H), 3.43 (t,  $J = 5.5$  Hz, 2H), 3.40 – 3.29 (m, 2H), 3.21 (t,  $J = 6.9$  Hz, 2H), 1.92 – 1.74 (m, 4H), 1.67 – 1.58 (m, 2H), 1.58 – 1.40 (m, 6H), 1.32 – 1.14 (m, 2H), 0.91 (d,  $J = 6.0$  Hz, 3H).  $^{13}\text{C}$  NMR (101 MHz,  $\text{CDCl}_3$ )  $\delta$  172.3, 58.0, 44.3, 38.5, 33.3, 32.0, 30.0, 29.4, 29.3, 20.3;  $m/z$  (ESI+) found  $[\text{M}+\text{H}]^+$  226.1776.  $\text{C}_{13}\text{H}_{24}\text{NO}_2^+$  requires 226.1798.

**(5S,8S)-1-(3-hydroxypropyl)-8-phenyl-1-azaspiro[4.5]decan-2-one, 8db and (5S,8S)-2-(3-hydroxypropyl)-8-phenyl-2-azaspiro[4.5]decan-1-one, 9db**

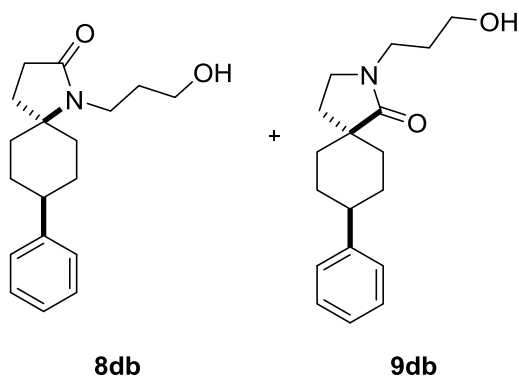

Following general procedure H, reaction with cyclobutanone **6d** (1.5 g, 7.0 mmol) and azidoalcohol **7b** (2.1 g, 21 mmol) provided the title compounds **8db** (840 mg, 42%) and **9db** (800 mg, 40%) as colorless oils.

**8db:**  $^1\text{H}$  NMR (400 MHz,  $\text{CDCl}_3$ )  $\delta$  7.28 (d,  $J = 4.4$  Hz, 4H), 7.19 – 7.12 (m, 1H), 4.25 (s, 1H), 3.42 (t,  $J = 5.7$  Hz, 2H), 3.23 – 3.11 (m, 2H), 3.03 – 2.90 (m, 1H), 2.36 (dd,  $J = 8.4, 7.4$  Hz, 2H), 2.19 (dtd,  $J = 12.0, 4.1, 3.5, 1.7$  Hz, 2H), 1.95 (t,  $J = 7.9$  Hz, 2H), 1.93 – 1.81 (m, 2H), 1.74 (td,  $J = 12.9, 3.7$  Hz, 2H), 1.55 – 1.39 (m, 2H), 1.32 (dt,  $J = 13.4, 3.1$  Hz, 2H).  $^{13}\text{C}$  NMR (101 MHz,  $\text{CDCl}_3$ )  $\delta$  176.4, 143.0, 128.5, 127.2, 125.9, 64.6, 58.1, 35.4, 35.3, 33.0, 31.0, 30.3, 29.2, 26.8.

**9db:**  $^1\text{H}$  NMR (500 MHz, DMSO)  $\delta$  7.31 – 7.26 (m, 2H), 7.25 – 7.19 (m, 2H), 7.19 – 7.13 (m, 1H), 4.45 (br s, 1H), 3.43 – 3.36 (m, 2H), 3.27 (t,  $J = 6.8$  Hz, 2H), 3.20 (t,  $J = 7.1$  Hz, 2H), 2.58 – 2.51 (m, 1H), 2.25 – 2.12 (m, 2H), 1.82 (d,  $J = 13.8$  Hz, 2H), 1.77 (t,  $J = 6.8$  Hz, 2H), 1.63 – 1.53 (m, 3H), 1.42 (td,  $J = 13.3, 3.8$  Hz, 2H).  $^{13}\text{C}$  NMR (126 MHz, DMSO)  $\delta$  177.5, 147.1, 128.3, 126.7, 125.8, 58.4, 43.1, 42.4, 41.3, 39.0, 34.6, 33.9, 30.1, 29.0;  $m/z$  (ESI+) found  $[\text{M}+\text{H}]^+$  288.1936.  $\text{C}_{18}\text{H}_{26}\text{NO}_2^+$  requires 288.1955.

**(5*S*,8*R*)-1-((*S*)-2-Hydroxy-2-phenylethyl)-8-methyl-1-azaspiro[4.5]decan-2-one, 8bc**

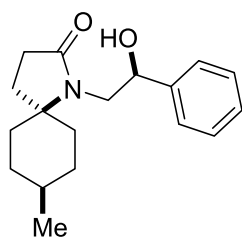

Following general procedure H, reaction with cyclobutanone **6b** (500 mg, 3.3 mmol) and azidoalcohol **7c** (1.6 g, 9.9 mmol) provided the title compound (520 mg, 55%) as a colorless oil. <sup>1</sup>H NMR (500 MHz, DMSO) δ 7.37 – 7.30 (m, 4H), 7.26 – 7.20 (m, 1H), 5.49 (d, *J* = 4.5 Hz, 1H), 4.88 (dt, *J* = 7.3, 4.9 Hz, 1H), 3.26 – 3.10 (m, 2H), 2.22 (t, *J* = 8.1 Hz, 2H), 1.89 – 1.66 (m, 4H), 1.64 – 1.51 (m, 2H), 1.51 – 1.42 (m, 1H), 1.38 (d, *J* = 13.3 Hz, 1H), 1.33 – 1.23 (m, 1H), 1.18 (dd, *J* = 13.0, 2.4 Hz, 1H), 0.93 (d, *J* = 7.2 Hz, 3H), 0.80 (dd, *J* = 12.4, 2.5 Hz, 1H).; <sup>13</sup>C NMR (126 MHz, DMSO) δ 175.1, 143.9, 127.9, 127.0, 126.0, 70.7, 63.4, 48.4, 28.8, 28.6, 28.4, 28.1, 27.9, 27.9, 25.2, 16.9; *m/z* (ESI+) found [M+H]<sup>+</sup> 288.1973. C<sub>18</sub>H<sub>26</sub>NO<sub>2</sub><sup>+</sup> requires 288.1958.

**(5*S*,8*R*)-1-((*S*)-3-Hydroxy-3-phenylpropyl)-8-phenyl-1-azaspiro[4.5]decan-2-one, 8dd and (5*S*,8*R*)-2-((*S*)-3-hydroxy-3-phenylpropyl)-8-phenyl-2-azaspiro[4.5]decan-1-one, 9dd**

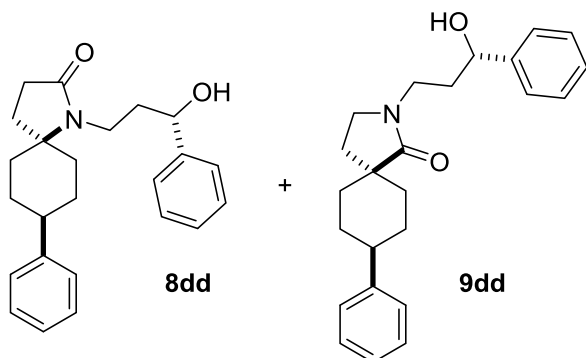

Following general procedure H, reaction with cyclobutanone **6d** (500 mg, 2.3 mmol) and azidoalcohol **7d** (1.2 g, 6.6 mmol) provided the title compounds **8dd** (340 mg, 40%) and **9dd** (340 mg, 40%) as colorless oils.

**8dd:** <sup>1</sup>H NMR (500 MHz, DMSO) δ 7.32 (d, *J* = 4.4 Hz, 4H), 7.29 – 7.22 (m, 4H), 7.22 – 7.17 (m, 2H), 5.26 (d, *J* = 4.3 Hz, 1H), 4.52 – 4.38 (m, 1H), 3.10 – 2.95 (m, 2H), 2.94 – 2.85 (m, 1H), 2.26 – 2.17 (m, 2H), 2.08 (d, *J* = 11.3 Hz, 2H), 1.97 – 1.82 (m, 4H), 1.76 – 1.59 (m, 4H), 1.38 – 1.28 (m, 2H). <sup>13</sup>C NMR (126 MHz, DMSO) δ 173.8, 145.4, 143.7 (u), 128.3, 128.0, 127.2, 126.7, 125.6, 125.6, 70.3, 62.8, 39.2, 36.7, 35.6, 31.3, 30.9, 30.3, 28.8, 26.6, 26.6; *m/z* (ESI+) found [M+H]<sup>+</sup> 364.2286. C<sub>24</sub>H<sub>30</sub>NO<sub>2</sub><sup>+</sup> requires 364.2285.

**9dd:** <sup>1</sup>H NMR (500 MHz, DMSO) δ 7.29 (m, 10H), 5.32 (s, 1H), 4.55 (s, 1H), 3.40, 3.26 (s, 4H), 2.51 (s, 1H), 2.21 (d, *J* = 11.0 Hz, 2H), 1.77 (m, 6H), 1.58 (d, *J* = 7.9 Hz, 2H), 1.41 (d, *J* = 10.8 Hz, 2H). <sup>13</sup>C NMR (126 MHz, DMSO) δ 177.5, 147.1, 145.9, 128.2, 128.0, 126.7, 126.7, 125.7, 125.7, 70.3, 43.1, 42.5, 41.3, 39.2, 36.8, 34.6, 33.9, 29.0; *m/z* (ESI+) found [M+H]<sup>+</sup> 364.2286. C<sub>24</sub>H<sub>30</sub>NO<sub>2</sub><sup>+</sup> requires 364.2271.

**(5*S*,8*R*)-1-((*S*)-3-Hydroxy-3-phenylpropyl)-8-(*o*-tolyl)-1-azaspiro[4.5]decan-2-one, 8fd and (5*S*,8*R*)-2-((*S*)-3-hydroxy-3-phenylpropyl)-8-(*o*-tolyl)-2-azaspiro[4.5]decan-1-one, 9fd**

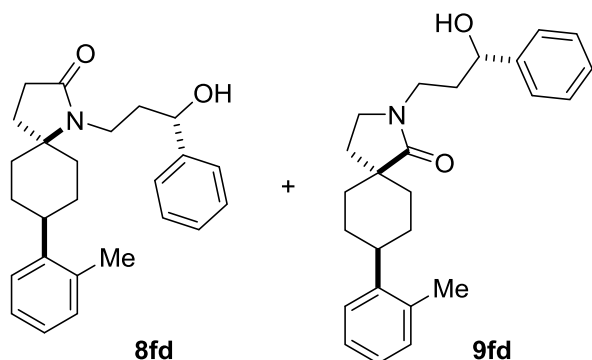

Following general procedure H, reaction with cyclobutanone **6f** (500 g, 2.2 mmol) and azidoalcohol **7b** (1.2 g, 6.6 mmol) provided the title compounds **8fd** (310 mg, 38%) and **9fd** (330 mg, 40%) as colorless oils.

**8fd**:  $^1\text{H}$  NMR (500 MHz, DMSO)  $\delta$  7.35 – 7.27 (m, 4H), 7.26 – 7.19 (m, 2H), 7.18 – 7.12 (m, 2H), 7.11 – 7.07 (m, 1H), 5.36 (d,  $J$  = 4.2 Hz, 1H), 4.64 – 4.48 (m, 1H), 3.44 – 3.36 (m, 1H), 3.34 – 3.26 (m, 1H), 3.03 – 2.88 (m, 1H), 2.28 (s, 3H), 2.26 – 2.20 (m, 2H), 1.96 – 1.70 (m, 10H), 1.62 – 1.45 (m, 2H).  $^{13}\text{C}$  NMR (126 MHz, DMSO)  $\delta$  173.9, 145.6, 144.2, 135.2, 130.3, 128.0, 126.7, 126.0, 125.8, 125.6, 70.4, 61.7, 40.4, 39.3, 38.0, 34.4, 33.9, 33.7, 32.7, 28.9, 27.3, 27.2, 19.2;  $m/z$  (ESI+) found  $[\text{M}+\text{H}]^+$  378.2438.  $\text{C}_{25}\text{H}_{32}\text{NO}_2^+$  requires 378.2428.

**9fd**:  $^1\text{H}$  NMR (500 MHz, DMSO)  $\delta$  7.39 – 7.35 (m, 2H), 7.35 – 7.29 (m, 2H), 7.26 – 7.19 (m, 2H), 7.14 (t,  $J$  = 7.5 Hz, 1H), 7.11 (d,  $J$  = 7.0 Hz, 1H), 7.04 (td,  $J$  = 7.4, 1.2 Hz, 1H), 5.33 (d,  $J$  = 4.4 Hz, 1H), 4.63 – 4.46 (m, 1H), 3.29 (t,  $J$  = 7.4 Hz, 2H), 3.25 (t,  $J$  = 6.8 Hz, 2H), 2.75 – 2.63 (m, 1H), 2.29 (s, 3H), 2.27 – 2.14 (m, 2H), 1.89 – 1.82 (m, 2H), 1.82 – 1.75 (m, 2H), 1.75 – 1.68 (m, 2H), 1.54 – 1.38 (m, 4H);  $^{13}\text{C}$  NMR (126 MHz, DMSO)  $\delta$  177.5, 145.9, 145.3, 134.6, 130.0, 128.0, 126.7, 126.0, 125.7, 125.4, 70.3, 43.1, 41.1, 39.1, 38.7, 36.8, 35.0, 34.6, 34.5, 28.4, 19.0;  $m/z$  (ESI+) found  $[\text{M}+\text{H}]^+$  378.2449.  $\text{C}_{25}\text{H}_{32}\text{NO}_2^+$  requires 378.2428.

General procedure I: Lactam reduction

**2-((5*R*\*,8*S*\*)-8-propyl-1-azaspiro[4.5]decan-1-yl)ethanol, 10ca**

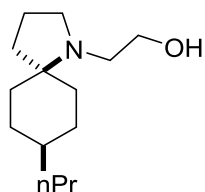

Lithium aluminum hydride (1M solution in diethyl ether, 2.5 mL, 2.5 mmol) was added to a solution of lactam **8ca** (0.14 g, 0.56 mmol) in anhydrous THF (2.0 mL) under argon. The reaction was heated

at reflux for 8 h, then cooled to 0° C and quenched by slow addition of sodium sulfate decahydrate (excess). The reaction was allowed to warm to rt and filtered through Celite® to remove the salts. The filtrate was concentrated, dissolved in ethyl acetate (50 mL), and washed with brine (3x50 mL). The combined organics were dried (Na<sub>2</sub>SO<sub>4</sub>) and concentrated to afford the title compound (0.10 g, 78%) as a colorless solid, which was used without further purification. <sup>1</sup>H NMR (400 MHz, CDCl<sub>3</sub>) δ 3.69 – 3.60 (m, 4H), 3.56 (t, *J* = 5.4 Hz, 2H), 2.86 – 2.76 (m, 1H), 2.65 (t, *J* = 5.4 Hz, 1H), 1.73 (dd, *J* = 4.1, 2.5 Hz, 3H), 1.70 – 1.58 (m, 5H), 1.58 – 1.47 (m, 4H), 1.27 (ddd, *J* = 7.0, 4.4, 2.7 Hz, 3H), 1.09 (s, 1H), 0.96 – 0.82 (m, 2H). <sup>13</sup>C NMR (101 MHz, CDCl<sub>3</sub>) δ 62.4, 62.3, 58.8, 50.0, 49.7, 34.1, 33.0, 31.9, 29.9, 27.6, 27.0, 21.0, 14.3; *m/z* (ESI+) found [M+H]<sup>+</sup> 226.2220. C<sub>14</sub>H<sub>28</sub>NO<sup>+</sup> requires 226.2165.

### 2-((5*R*,8*S*)-8-Phenyl-1-azaspiro[4.5]decan-1-yl)ethanol, 10da

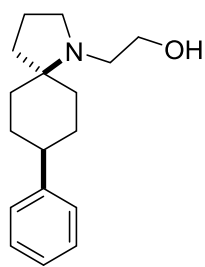

Following general procedure I, reaction with lactam **8da** (2.2 g, 8.1 mmol) provided the title compound (1.4 g, 65%) as an oil. <sup>1</sup>H NMR (500 MHz, DMSO) δ 7.39 – 7.26 (m, 4H), 7.17 (ddt, *J* = 8.5, 6.4, 1.8 Hz, 1H), 4.28 (s, 1H), 3.39 – 3.35 (m, 2H), 2.88 – 2.78 (m, 1H), 2.74 (t, *J* = 7.0 Hz, 2H), 2.35 (t, *J* = 6.8 Hz, 2H), 2.13 – 1.99 (m, 2H), 1.81 – 1.65 (m, 4H), 1.65 – 1.59 (m, 2H), 1.59 – 1.49 (m, 2H), 1.29 – 1.12 (m, 2H). <sup>13</sup>C NMR (126 MHz, DMSO) δ 144.7, 128.2, 127.0, 125.4, 62.9, 60.7, 50.6, 50.5, 37.7, 35.2, 29.4, 28.0, 20.8; *m/z* (ESI+) found [M+H]<sup>+</sup> 260.1989. C<sub>17</sub>H<sub>26</sub>NO<sup>+</sup> requires 260.1976.

### (5*S*,8*S*)-1-(3-Hydroxypropyl)-8-phenyl-1-azaspiro[4.5]decan-2-one, 10db

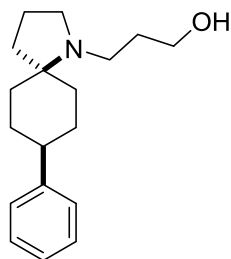

Following general procedure I, reaction with lactam **8db** (1.0 g, 3.5 mmol) provided the title compound (620 mg, 65%) as an oil. <sup>1</sup>H NMR (400 MHz, CDCl<sub>3</sub>) δ 7.27 (dt, *J* = 12.9, 7.5 Hz, 4H), 7.16 – 7.08 (m, 1H), 3.83 – 3.67 (m, 2H), 2.88 – 2.82 (m, 2H), 2.79 (q, *J* = 5.4 Hz, 1H), 2.61 – 2.48 (m, 2H), 2.02 (ddd, *J* = 12.2, 6.5, 2.9 Hz, 2H), 1.79 – 1.56 (m, 10H), 1.22 (ddd, *J* = 17.7, 7.8, 4.1 Hz, 3H); <sup>13</sup>C NMR (101 MHz, CDCl<sub>3</sub>) δ 145.1, 128.3, 127.3, 125.6, 65.2, 64.0, 50.0, 49.3, 38.8, 35.5, 29.8, 28.5, 20.8.

## General procedure J: Cyclobutanone reduction

### Spiro[3.5]nonan-1-ol, S9a

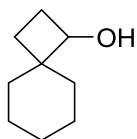

Sodium borohydride (2.5 g, 66 mmol) was added to a solution of cyclobutanone **6a** (3.6 g, 26 mmol) in THF (120 mL), followed by dropwise addition of methanol (12 ml). The solution was stirred at room temperature for 8 h. The reaction was quenched by the slow addition of acetone at 0° C. Water was then added and the solution extracted dichloromethane (x3). The combined organics were washed with brine, dried (Na<sub>2</sub>SO<sub>4</sub>) and concentrated. The crude product was purified by automated column chromatography (40 g silica column, 0 to 30% EtOAc in hexanes over 30 min) to afford the title compound (3.5 g, 95%) as a colorless oil. The NMR data closely matched that previously reported<sup>61</sup>.

### (1*R*,4*R*,7*S*)-7-Propylspiro[3.5]nonan-1-ol, S9c

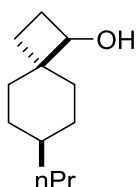

Following general procedure J, reaction with ketone **6c** (1.8 g, 10 mmol) provided the title compound (1.7 g, 94%) as a colorless oil. <sup>1</sup>H NMR (400 MHz, CDCl<sub>3</sub>) δ 3.88 (t, *J* = 7.4 Hz, 1H), 2.24 – 2.09 (m, 1H), 2.01 – 1.92 (m, 1H), 1.70 (dddd, *J* = 11.7, 10.4, 9.0, 7.2 Hz, 1H), 1.62 – 1.46 (m, 3H), 1.45 – 1.38 (m, 1H), 1.32 – 1.09 (m, 9H), 1.09 – 0.95 (m, 1H), 0.82 (t, *J* = 7.2 Hz, 3H). <sup>13</sup>C NMR (101 MHz, CDCl<sub>3</sub>) δ 74.9, 45.2, 38.5, 37.9, 36.1, 30.3, 30.1, 29.3, 27.3, 26.6, 20.2, 14.4 (dn).

### (1*R*,4*S*,7*S*)-7-Phenylspiro[3.5]nonan-1-ol, S9d

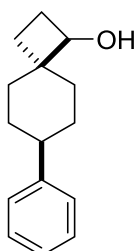

Following general procedure J, reaction with ketone **6d** (5.4 g, 25 mmol) provided the title compound (5.3 g, 97%) as a colorless oil. <sup>1</sup>H NMR (400 MHz, CDCl<sub>3</sub>) δ 7.37 – 7.19 (m, 5H), 4.10 (t, *J* = 7.3 Hz, 1H), 2.53 (qd, *J* = 9.7, 8.5, 3.2 Hz, 1H), 2.40 – 2.24 (m, 2H), 1.88 – 1.77 (m, 5H), 1.75 – 1.63 (m,

1H), 1.62 – 1.50 (m, 2H), 1.49 – 1.30 (m, 2H). <sup>13</sup>C NMR (101 MHz, CDCl<sub>3</sub>) δ 147.5, 128.3, 126.9, 125.9, 75.0, 44.6, 43.7, 39.1, 31.9, 31.9, 30.7, 27.5, 26.9.

### C. Experimental procedures and characterization data for sparteine-inspired scaffolds.

**Supplementary Figure 6.** Synthesis of sparteine-inspired scaffolds

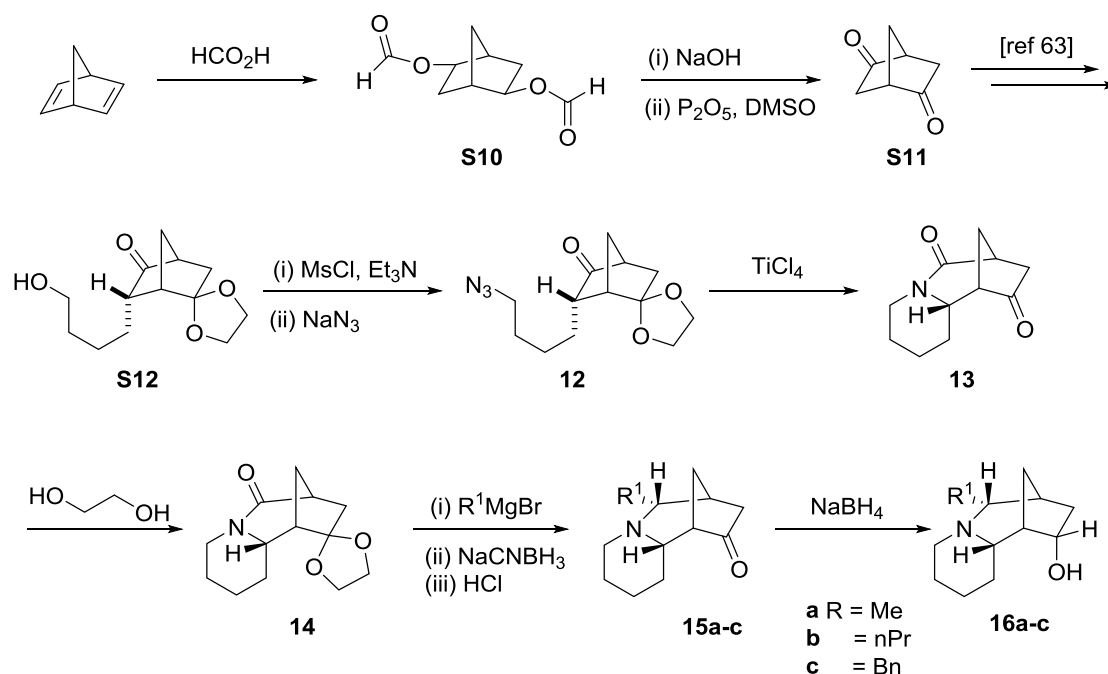

#### Bicyclo[2.2.1]heptane-2,5-dione, S11

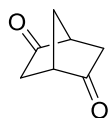

In a 1L round bottom flask, 2, 5-norbornadiene (100 g, 1.08 mol) and 97% formic acid (600 mL) was added under an argon atmosphere. The reaction was refluxed at 120 °C for 24h then the formic acid was distilled off and the diformate **S10** was obtained by vacuum distillation (120-130 °C at 10 mmHg) as a clear liquid. The crude diformate (198.7 g, 1.07 mol) was placed in a 3L round bottom flask and dissolved in THF (1.5 l). The solution was cooled to 0 °C and a solution of NaOH (424 g) in water (600 mL) was added via a dropping funnel over 30 min. The reaction mixture was stirred at room temperature for 10 h then extracted with ethyl acetate. The aqueous layer was saturated with sodium chloride then extracted again with ethyl acetate. The combined organics were dried (MgSO<sub>4</sub>) and concentrated to obtain the crude diol (100 g) as a colorless solid. The diol was vacuum dried for 4h and transferred to a three-neck 4L round bottom flask fitted with a mechanical stirrer. Anhydrous dimethylsulfoxide (225 mL) was added and the mixture was stirred till the solution became



completely clear. The solution was diluted with dichloromethane (800 mL) and phosphorous pentoxide (450 g, 1.58 mol) was added. The reaction mixture was stirred vigorously for 1h at rt then cooled to 0 °C and triethylamine (661 mL, 4.75 mol) was added dropwise over 1 h. After the addition was complete, the reaction was stirred at 0 °C for 1 h, then quenched with 10% aqueous HCl (800 mL) and extracted with dichloromethane (4 x 600 mL). The combined organics were dried (MgSO<sub>4</sub>) and concentrated. The crude product was purified chromatography (silica gel, 70:30 hexanes: ethyl acetate) to obtain the title compound (80 g, 60%) as a colorless oil.  $\delta_{\text{H}}$  (400 MHz, CDCl<sub>3</sub>) 2.98 – 2.77 (m, 2H), 2.36 – 2.14 (m, 2H), 2.11 – 1.80 (m, 4H);  $\delta_{\text{C}}$  (100 MHz, CDCl<sub>3</sub>) 212.3, 48.5, 38.8, 36.2. The spectral data was consistent with that previously reported.<sup>62</sup>

**(1S,4S,6S)-6-(4-azidobutyl)spiro[bicyclo[2.2.1]heptane-2,2'-[1,3]dioxolan]-5-one, 12**

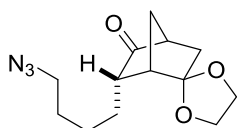

Methanesulfonyl chloride (4.83 mL, 62.4 mmol) was added dropwise to a solution of (1S,4S,6S)-6-(4-hydroxybutyl)spiro[bicyclo[2.2.1]heptane-2,2'-[1,3]dioxolan]-5-one (**S12**)<sup>63</sup> (10 g, 41.6 mmol) in dichloromethane (200 mL) at 0 °C under argon. Triethylamine (8.68 mL, 62.4 mmol) was then added dropwise and the mixture was stirred for 1 h at 0 °C. The reaction was quenched with saturated aqueous NH<sub>4</sub>Cl and extracted with ethyl acetate. The combined organics were dried (Na<sub>2</sub>SO<sub>4</sub>) and concentrated to afford the crude mesylate product. The product was dried over high vacuum for 30 min and the residue was dissolved in DMF (100 mL). Sodium azide (9.42 g, 14.5 mmol) was added to the solution and the mixture was heated at 50 °C for 7 h, then diluted with water and extracted with ethyl acetate. The combined organics were dried (Na<sub>2</sub>SO<sub>4</sub>) and concentrated. The crude product was purified by chromatography (90:10 hexanes/ethyl acetate) to afford the title compound (10.1 g, 92%) as a colorless liquid.  $\delta_{\text{H}}$  (400 MHz, CDCl<sub>3</sub>) 4.15 – 3.57 (m, 2H), 3.27 (t, *J* = 6.8 Hz, 2H), 2.56 (dd, *J* = 38.1, 3.6 Hz, 2H), 2.23 – 1.97 (m, 3H), 1.92 – 1.26 (m, 8H);  $\delta_{\text{C}}$  (100 MHz, CDCl<sub>3</sub>) 217.7, 115.0, 65.4, 63.5, 52.7, 51.2, 49.2, 45.9, 39.1, 36.5, 28.8, 26.7, 25.7. The spectral data was consistent with that previously reported.<sup>63</sup>

**(7S,10S,10aS)-octahydro-7,10-methanopyrido[1,2-*a*]azepine-6,9-dione, 13**

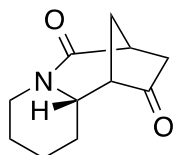

TiCl<sub>4</sub> (20.7 mL, 188.5 mmol) was added dropwise by syringe to a solution of azide **12** (10.0 g, 37.7 mmol) in dichloromethane (350 mL) at 0 °C under argon. The resulting yellow precipitate was allowed to warm to room temperature and stirred for 24 h. The reaction was quenched with water and extracted with dichloromethane. The combined organics were dried (Na<sub>2</sub>SO<sub>4</sub>) and concentrated to afford an oil. The crude product was purified by chromatography (silica gel, 100% EtOAc) to afford

the title compound (4.5 g, 62%) as a colorless solid.  $\delta_{\text{H}}$  (400 MHz,  $\text{CDCl}_3$ ) 4.53 (ddt,  $J = 13.4, 4.1, 2.0$  Hz, 1H), 3.30 (ddd,  $J = 11.8, 4.2, 2.6$  Hz, 1H), 3.05 (dt,  $J = 5.4, 1.9$  Hz, 1H), 2.47 (dt,  $J = 5.7, 3.4$  Hz, 1H), 2.41 – 2.24 (m, 3H), 2.18 – 2.02 (m, 2H), 1.85 – 1.51 (m, 3H), 1.40 – 1.10 (m, 3H);  $\delta_{\text{C}}$  (100 MHz,  $\text{CDCl}_3$ ) 214.7, 171.7, 59.2, 50.5, 43.7, 41.8, 41.0, 30.6, 30.6, 25.0, 24.2. The spectral data was consistent with that previously reported.<sup>63</sup>

**(7S,10S,10aS)-hexahydro-1H-spiro[7,10-methanopyrido[1,2- $\alpha$ ]azepine-9,2'-[1,3]dioxolan]-6(2H)-one, **14****

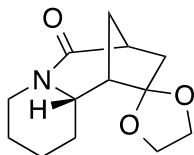

Chlorotrimethylsilane (13.1 mL, 103 mmol) was added dropwise to a solution of lactam **13** (5.0 g, 25.9 mmol) in dry ethylene glycol (80 mL) at room temperature under argon. The reaction mixture was stirred for 6 h at room temperature then water (50 mL) was added and the mixture extracted with diethyl ether (3 x 50 mL). The combined organics were dried ( $\text{Na}_2\text{SO}_4$ ) and concentrated. The crude product was purified by chromatography (silica gel, 70:30 ethyl acetate/hexanes) to afford the title compound (4.29 g, 70%) as a colorless solid. Mp 90-91 °C;  $\nu_{\text{max}}$  (film)/ $\text{cm}^{-1}$  2940, 1638;  $\delta_{\text{H}}$  (400 MHz,  $\text{CDCl}_3$ ) 4.52 (1H, ddt,  $J$  13.3, 4.2, 2.0), 4.04–3.69 (4H, m), 3.19 (1H, dt,  $J$  12.3, 2.9), 2.69 (1H, ddd,  $J$  7.3, 4.5, 1.6), 2.36 (1H, td,  $J$  13.0, 3.2), 2.27–1.98 (5H, m), 1.87–1.73 (2H, m), 1.70–1.58 (1H, m), 1.58–1.46 (1H, m), 1.42–1.16 (2H, m);  $\delta_{\text{C}}$  (100 MHz,  $\text{CDCl}_3$ ) 174.3, 117.1, 65.2, 63.3, 61.2, 46.0, 42.2, 42.0, 41.2, 32.5, 29.8, 25.3, 25.0;  $m/z$  (ESI+) found  $[\text{M}+\text{H}]^+$  238.143.  $\text{C}_{13}\text{H}_{20}\text{NO}_3^+$  requires 238.1438.

**(7S,9S,10S,10aS)-9-hydroxyoctahydro-7,10-methanopyrido[1,2- $\alpha$ ]azepin-6(2H)-one, **S13****

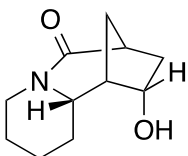

Sodium borohydride (196 mg, 5.18 mmol) was added to a solution of lactam **13** (500 mg, 2.58 mmol) in methanol (25 mL) at 0 °C. The reaction mixture was stirred at room temperature for 4 h, then quenched with 10% aqueous NaOH and extracted with ethyl acetate. The combined organics were dried ( $\text{MgSO}_4$ ) and concentrated. The crude product was purified by chromatography (silica gel, 100% ethyl acetate) to afford the title compound (444 mg, 88%) as a colorless solid as a single diastereomer. Mp 110-111 °C;  $\nu_{\text{max}}$  (film)/ $\text{cm}^{-1}$  1623, 2931, 3355  $\text{cm}^{-1}$ ;  $\delta_{\text{H}}$  (400 MHz,  $\text{CDCl}_3$ ) 4.60 – 4.38 (m, 2H), 3.32 (d,  $J = 12.4$  Hz, 1H), 3.12 (s, 1H), 2.67 – 2.51 (m, 1H), 2.48 – 2.19 (m, 4H), 1.80 (dd,  $J = 12.8, 1.6$  Hz, 1H), 1.75 – 1.53 (m, 5H), 1.43 – 1.10 (m, 2H);  $\delta_{\text{C}}$  (100 MHz,  $\text{CDCl}_3$ ) 175.1, 75.3, 62.7, 43.1, 42.2, 42.1, 38.3, 31.8, 30.6, 25.5, 25.2;  $m/z$  (ESI+) found  $[\text{M}+\text{H}]^+$  196.1330.  $\text{C}_{11}\text{H}_{18}\text{NO}_2^+$  requires 196.1332.

**(7S,9S,10S,10aS)-6-oxodecahydro-7,10-methanopyrido[1,2-*a*]azepin-9-yl 4-bromobenzoate, S14**

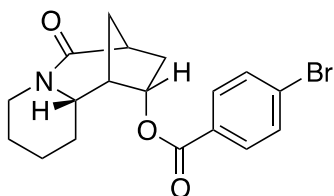

To a solution of alcohol **S13** (50 mg, 0.25 mmol) in dichloromethane (3 mL) was added triethylamine (0.071 mL, 0.51 mmol) and *N,N*-dimethylaminopyridine (2 mg). *p*-Bromobenzoyl chloride (84 mg, 0.38 mmol) was then added and the reaction mixture stirred at room temperature for 8 h. The solvent was evaporated and the crude reaction mixture was purified by chromatography (silica gel, 60:40 ethyl acetate/hexanes) to obtain the title compound (89 mg, 92%) as a colorless solid. Mp 130–132 °C;  $\nu_{\max}$  (film)/ $\text{cm}^{-1}$  1647, 1716, 2938;  $\delta_{\text{H}}$  (400 MHz,  $\text{CDCl}_3$ ) 7.93 – 7.76 (m, 2H), 7.67 – 7.50 (m, 2H), 5.50 – 5.37 (m, 1H), 4.66 – 4.52 (m, 1H), 3.36 (ddd,  $J = 12.3, 7.5, 4.7$  Hz, 1H), 2.83 – 2.70 (m, 2H), 2.56 (m, 1H), 2.41 (td,  $J = 13.0, 3.1$  Hz, 1H), 2.00 – 1.80 (m, 4H), 1.81 – 1.53 (m, 3H), 1.45 – 1.13 (m, 2H);  $\delta_{\text{C}}$  (100 MHz,  $\text{CDCl}_3$ ) 174.2, 165.9, 132.0, 131.2, 128.9, 128.5, 77.1, 62.2, 42.2, 41.6, 41.5, 35.2, 31.8, 30.5, 25.6, 25.3;  $m/z$  (ESI+) found  $[\text{M}+\text{H}]^+$  378.0695.  $\text{C}_{18}\text{H}_{21}\text{BrNO}_3^+$  requires 378.0699.

General procedure K: Grignard addition to lactam; reduction of aminal

**(6R,7S,10S,10aS)-6-methyloctahydro-7,10-methanopyrido[1,2-*a*]azepin-9(6H)-one, 15a**

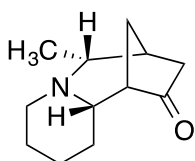

$\text{MeMgCl}$  (2.8 mL, 8.4 mmol, 3M in THF) was added dropwise to a stirring solution of lactam **13** (500 mg, 2.1 mmol) in dry THF (20 mL). The mixture was heated at 60 °C for 3 h, then cooled to 0 °C and  $\text{NaBH}_3\text{CN}$  (792 mg, 12.6 mmol) added followed by glacial acetic acid (1.0 mL). The reaction mixture was stirred for 1 h at room temperature then quenched with 10% aqueous  $\text{NaOH}$  (10 mL) and extracted with ethyl acetate (3 x 50mL). The combined organics were dried ( $\text{MgSO}_4$ ) and concentrated. The residue was dissolved in conc.  $\text{HCl}$  (2 mL) and acetone (20 mL) and refluxed for 2 h. The reaction mixture was cooled to 0 °C and basified to  $\text{pH} > 10$  by addition of 10 % aqueous  $\text{NaOH}$  and extracted with ethyl acetate. The combined organics were dried ( $\text{MgSO}_4$ ) and concentrated. The crude product was purified by chromatography (silica gel, 1:4:0.5 ethyl acetate/hexanes/ $\text{NH}_4\text{OH}$ ) to afford the title compound (354 mg, 87%) as a colorless oil as a single diastereomer.  $\nu_{\max}$  (film)/ $\text{cm}^{-1}$ ;  $\delta_{\text{H}}$  (400 MHz,  $\text{CDCl}_3$ ) 3.05 (m, 1H), 2.43 (m, 1H), 2.33 – 2.22 (m, 2H), 2.14 (m, 1H), 2.06 – 1.91 (m, 3H), 1.86 – 1.77 (m, 1H), 1.75 – 1.61 (m, 3H), 1.61 – 1.10 (m, 5H), 1.06 (d,  $J = 6.3$  Hz, 3H);  $\delta_{\text{C}}$  (100 MHz,  $\text{CDCl}_3$ ) 218.6, 67.5, 61.1, 52.2, 51.2, 40.5, 39.8, 37.3, 30.3, 25.9, 24.6, 19.0;  $m/z$  (ESI+) found  $[\text{M}+\text{H}]^+$  194.1530.  $\text{C}_{12}\text{H}_{20}\text{NO}^+$  requires 194.1539.

**(6*R*,7*S*,10*S*,10*aS*)-6-butyl-8-oxo-6,7,8,9-tetrahydro-5*H*-pyrido[1,2-*a*]azepin-9(6*H*)-one, 15b**

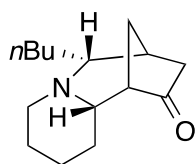

Following general procedure K, reaction of lactam **13** (500 mg, 2.1 mmol) and *n*-butylmagnesium chloride (2M in THF, 4.2 ml, 8.4 mmol) provided the title compound (400 mg, 88%) as a colorless oil.  $\nu_{\max}$  (film)/ $\text{cm}^{-1}$  2933, 1741;  $\delta_{\text{H}}$  (400 MHz,  $\text{CDCl}_3$ ) 3.08 (d,  $J = 11.2$  Hz, 1H), 2.42 (s, 1H), 2.27 – 2.03 (m, 3H), 2.01 – 1.84 (m, 3H), 1.71 (dd,  $J = 11.0, 3.6$  Hz, 1H), 1.67 – 1.55 (m, 3H), 1.55 – 1.02 (m, 10H), 0.83 (dd,  $J = 10.0, 4.0$  Hz, 3H);  $\delta_{\text{C}}$  (100 MHz,  $\text{CDCl}_3$ ) 218.1, 67.5, 66.4, 52.1, 51.1, 39.8, 36.8, 36.6, 31.3, 30.4, 29.6, 25.8, 24.5, 23.1, 14.1;  $m/z$  (ESI+) found  $[\text{M}+\text{H}]^+$  236.2004.  $\text{C}_{15}\text{H}_{26}\text{NO}^+$  requires 236.2009.

**(6*R*,7*S*,10*S*,10*aS*)-6-benzyl-8-oxo-6,7,8,9-tetrahydro-5*H*-pyrido[1,2-*a*]azepin-9(6*H*)-one, 15c**

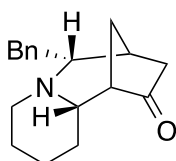

Following general procedure K, reaction of lactam **13** (500 mg, 2.1 mmol) and benzylmagnesium chloride (2M in THF, 4.2 ml, 8.4 mmol) provided the title compound (429 mg, 87%) as a colorless liquid.  $\nu_{\max}$  (film)/ $\text{cm}^{-1}$  1740, 2935  $\text{cm}^{-1}$ ;  $\delta_{\text{H}}$  (400 MHz,  $\text{CDCl}_3$ ) 7.30 (dd,  $J = 10.1, 4.5$  Hz, 2H), 7.21 (dd,  $J = 8.4, 6.3$  Hz, 1H), 7.17 – 7.08 (m, 2H), 3.34 (d,  $J = 11.2$  Hz, 1H), 3.20 (dd,  $J = 13.6, 4.1$  Hz, 1H), 2.58 (ddd,  $J = 9.9, 4.1, 1.4$  Hz, 1H), 2.41-2.36 (m, 2H), 2.27 – 2.14 (m, 2H), 2.07 – 1.78 (m, 4H), 1.78 – 1.38 (m, 6H), 1.35 – 1.14 (m, 1H);  $\delta_{\text{C}}$  (100 MHz,  $\text{CDCl}_3$ ) 217.7, 139.8, 129.4, 128.5, 126.1, 67.7, 67.5, 52.1, 51.3, 39.5, 37.6, 36.6, 35.2, 30.4, 25.9, 24.5;  $m/z$  (ESI+) found  $[\text{M}+\text{H}]^+$  270.1855.  $\text{C}_{18}\text{H}_{24}\text{NO}^+$  requires 270.1852.

**4-Nitrophenyl carbonate, 39**

**((7*S*,9*S*,10*S*,10*aS*)-6-oxodecahydro-7,10-methanopyrido[1,2-*a*]azepin-9-yl)**

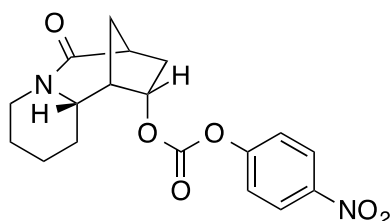

4-nitrophenyl chloroformate (1.86 g, 9.2 mmol) was added to a solution of alcohol **S13** (1.5 g, 7.68 mmol) and pyridine (0.92 mL, 11.5 mmol) in anhydrous THF (40 mL) at room temperature under argon. The reaction mixture was stirred at room temperature for 2 h. The solvent was evaporated and the crude residue was purified by chromatography (silica gel, 7:3 EtOAc/hexane) to afford the

title compound (2.62 g, 95%) as a colorless solid.  $\nu_{\max}$  (film)/ $\text{cm}^{-1}$  1740, 2935  $\text{cm}^{-1}$ ;  $\delta_{\text{H}}$  (400 MHz,  $\text{CDCl}_3$ ) 8.32 – 8.24 (m, 2H), 7.42 – 7.30 (m, 2H), 5.26 (dt,  $J = 10.9, 5.6$  Hz, 1H), 4.67 – 4.49 (m, 1H), 3.47 – 3.34 (m, 1H), 2.81 – 2.70 (m, 2H), 2.57 (ddd,  $J = 14.4, 10.6, 7.8$  Hz, 1H), 2.44 (td,  $J = 13.1, 3.1$  Hz, 1H), 2.10 – 1.62 (m, 7H), 1.51 – 1.20 (m, 2H);  $\delta_{\text{C}}$  (100 MHz,  $\text{CDCl}_3$ ) 173.8, 155.5, 152.3, 145.6, 125.5, 122.0, 81.2, 62.2, 42.3, 41.6, 41.4, 35.1, 31.6, 30.3, 25.6, 25.2.  $m/z$  (ESI+) found  $[\text{M}+\text{H}]^+$  361.1392.  $\text{C}_{18}\text{H}_{21}\text{N}_2\text{O}_6^+$  requires 361.1394.

**(7S,9S,10S,10aS)-decahydro-7,10-methanopyrido[1,2-*a*]azepin-9-ol, 41**

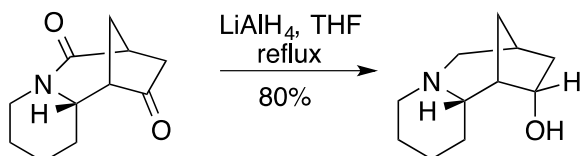

Lithium aluminum hydride (784 mg, 20.71 mmol) was added to a solution of lactam **13** (2.0 g, 10.3 mmol) in methanol (quantity) at 0 °C. The reaction mixture was refluxed for 4 h, then cooled, quenched with 10% aqueous NaOH and extracted with ethyl acetate. The combined organics were dried ( $\text{Na}_2\text{SO}_4$ ) and concentrated to afford the crude amino alcohol, which was purified by flash column chromatography (silica gel, 1:5:0.5 EtOAc/hexane/aq. $\text{NH}_3$ ) to obtain the title product (1.5g, 80%) as a colorless oil.  $\nu_{\max}$  (film)/ $\text{cm}^{-1}$  3394, 2932;  $\delta_{\text{H}}$  (400 MHz,  $\text{CDCl}_3$ ) 4.20 (s, 1H), 4.15 – 4.05 (m, 1H), 2.64 – 2.46 (m, 2H), 2.09 – 1.94 (m, 2H), 1.94 – 1.78 (m, 3H), 1.78 – 1.63 (m, 2H), 1.49 (t,  $J = 15.2$  Hz, 1H), 1.45 – 1.12 (m, 6H), 1.02 – 0.85 (m, 1H);  $\delta_{\text{C}}$  (100 MHz,  $\text{CDCl}_3$ ) 74.5, 68.0, 62.6, 55.5, 42.3, 41.8, 38.8, 34.7, 30.6, 25.4, 24.3.

**General procedure L: Reduction of ketones 15a-c**

**(6R,7S,9S,10S,10aS)-6-methyldecahydro-7,10-methanopyrido[1,2-*a*]azepin-9-ol, 16a**

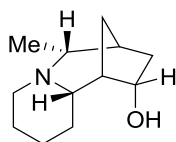

Sodium borohydride (978 mg, 25.85 mmol) was added to a solution of amine **15a** (2.0 g, 10.3 mmol) in methanol (40 mL) at 0 °C. The reaction mixture was stirred at room temperature for 4 h, then quenched with 10% aqueous NaOH and extracted with ethyl acetate. The combined organics were dried ( $\text{Na}_2\text{SO}_4$ ) and concentrated to afford the crude amino-alcohols. Purification by chromatography (silica gel, 1:4:0.5 EtOAc/Hexane/aq. $\text{NH}_3$ ) provided the title compound (1.59 g, 79%) as a colorless oil.  $\nu_{\max}$  (film)/ $\text{cm}^{-1}$  3392, 2932;  $\delta_{\text{H}}$  (400 MHz,  $\text{CDCl}_3$ ) 4.28 (m, 2H), 3.14 (m, 1H), 2.19 (qd,  $J = 6.3, 1.5$  Hz, 1H), 2.13 – 1.93 (m, 3H), 1.92 – 1.85 (m, 1H), 1.84 – 1.75 (m, 1H), 1.73 – 1.30 (m, 9H), 1.03 (d,  $J = 6.3$  Hz, 3H);  $\delta_{\text{C}}$  (100 MHz,  $\text{CDCl}_3$ ) 74.4, 68.6, 63.3, 51.9, 43.2, 42.5, 39.9, 37.8, 31.7, 26.2, 25.1, 18.6.

**(6*R*,7*S*,9*S*,10*S*,10*aS*)-6-butyldecahydro-7,10-methanopyrido[1,2-*a*]azepin-9-ol, 16b**

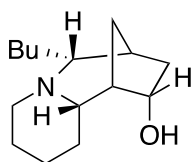

Following general procedure L, reaction of ketone **15b** (2.0 g, 8.42 mmol) provided the title compound (1.6 g, 80%) as a colorless oil.  $\nu_{\text{max}}$  (film)/ $\text{cm}^{-1}$  3393, 2944;  $\delta_{\text{H}}$  (400 MHz,  $\text{CDCl}_3$ ) 4.64 – 3.97 (m, 2H), 3.23 (d,  $J = 11.3$  Hz, 1H), 2.22 – 1.79 (m, 6H), 1.79 – 0.97 (m, 15H), 0.88 (t,  $J = 7.1$  Hz, 3H);  $\delta_{\text{C}}$  (100 MHz,  $\text{CDCl}_3$ ) 74.4, 69.1, 68.7, 52.0, 43.3, 39.7, 38.7, 38.1, 32.0, 31.2, 29.9, 26.3, 25.1, 23.2, 14.2.

**(6*R*,7*S*,9*S*,10*S*,10*aS*)-6-benzyldecahydro-7,10-methanopyrido[1,2-*a*]azepin-9-ol, 16c**

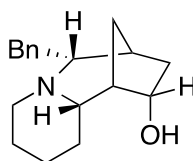

Following general procedure L, reaction of ketone **15c** (1.8 g, 6.68 mmol) provided the title compound (1.57 g, 87%) as a colorless oil.  $\nu_{\text{max}}$  (film)/ $\text{cm}^{-1}$  3394, 2930;  $\delta_{\text{H}}$  (400 MHz,  $\text{CDCl}_3$ ) 7.34 – 7.25 (m, 2H), 7.25 – 7.18 (m, 1H), 7.18 – 7.12 (m, 2H), 4.60 – 4.19 (m, 2H), 3.47 (m, 1H), 3.21 (dd,  $J = 13.2, 3.5$  Hz, 1H), 2.57 – 2.32 (m, 2H), 2.28 – 1.90 (m, 4H), 1.89 – 1.61 (m, 5H), 1.61 – 1.38 (m, 4H), 1.37 – 1.11 (m, 1H);  $\delta_{\text{C}}$  (100 MHz,  $\text{CDCl}_3$ ) 140.3, 129.4, 128.4, 125.9, 74.2, 70.0, 69.2, 52.2, 43.3, 39.4, 37.7, 37.3, 37.2, 31.9, 26.2, 25.0.

## D. Experimental procedures and characterization data for mesembrine-inspired scaffolds.

Supplementary Figure 7. Synthesis of *Stemona* alkaloid-inspired scaffolds

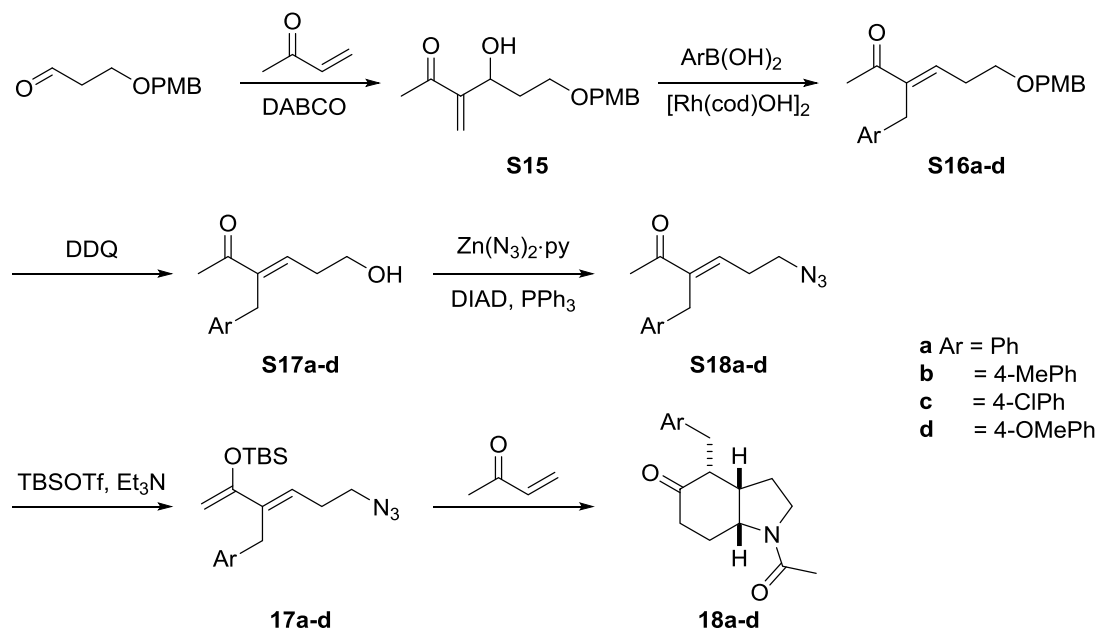

### 4-Hydroxy-6-((4-methoxybenzyl)oxy)-3-methylenehexan-2-one, **S15**

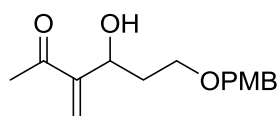

DABCO (4.63 g, 38.3 mmol) was added to a solution of 3-(4-methoxybenzyloxy)propan-1-ol<sup>64</sup> in 2-octanol (40 ml) at room temperature, followed by methyl vinyl ketone (12.7 ml, 153 mmol). The reaction mixture was stirred at room temperature for 16 h, then the reaction mixture was directly loaded onto a silica gel column and eluted with 60:40 hexanes:ethyl acetate to afford the title compound (21.5 g, 64%) as a viscous oil.  $\nu_{\text{max}}$  (film)/ $\text{cm}^{-1}$  3463, 2862, 1736, 1671, 1612, 1512, 1243;  $\delta_{\text{H}}$  (400 MHz,  $\text{CDCl}_3$ ) 7.29 – 7.21 (m, 2H), 6.92 – 6.83 (m, 2H), 6.14 (s, 2H), 4.70 (dt,  $J = 7.8, 3.9$  Hz, 1H), 4.51 – 4.38 (m, 2H), 3.81 (s, 3H), 3.75 – 3.57 (m, 3H), 2.34 (s, 3H), 2.03 – 1.92 (m, 1H), 1.84 – 1.71 (m, 1H);  $\delta_{\text{C}}$  (100 MHz,  $\text{CDCl}_3$ ) 200.0, 159.5, 150.3, 130.0, 129.5, 125.9, 114.0, 73.2, 70.1, 68.8, 55.4, 36.0, 26.5;  $m/z$  (ESI+) found  $[\text{M}+\text{H}]^+$  265.1458.  $\text{C}_{15}\text{H}_{21}\text{O}_4^+$ : requires 265.1440.

## General procedure M: Synthesis of enones *via* Rh(I) catalyzed 1,4-addition

### (*E*)-3-Benzyl-6-((4-methoxybenzyl)oxy)hex-3-en-2-one, S16a

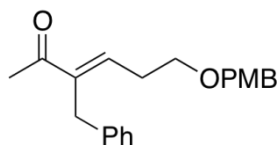

This enone was synthesized using a modified procedure previously reported by Gendrineau and co-workers.<sup>65</sup> Phenyl boronic acid (0.97 g, 8 mmol) was added to a solution of hydroxyketone **S15** (1.05 g, 4.0 mmol) in methanol (5 ml) in a sealed tube. [Rh(cod)OH]<sub>2</sub> (18.2 mg, 0.04 mmol) was then added and the mixture heated at 100 °C for 2 h. The reaction mixture was then cooled transferred to a round bottom flask and the solvent evaporated under reduced to pressure to obtain the crude product. The crude product was purified by chromatography (silica gel, 80:20 hexane/ethyl acetate) to afford the title compound (1.10 g, 86%, *E:Z* >95: 5) as a colorless viscous oil.  $\nu_{\max}$  (film)/cm<sup>-1</sup> 2928, 2833, 1660, 1611, 1510, 1243;  $\delta_{\text{H}}$  (400 MHz, CDCl<sub>3</sub>) 7.28 – 7.18 (m, 4H), 7.16 – 7.10 (m, 3H), 6.91 – 6.86 (m, 2H), 6.82 (t, *J* = 7.0 Hz, 1H), 4.44 (s, 2H), 3.81 (s, 3H), 3.68 (s, 2H), 3.54 (t, *J* = 6.4 Hz, 2H), 2.61 (q, *J* = 6.5 Hz, 2H), 2.32 (s, 3H);  $\delta_{\text{C}}$  (100 MHz, CDCl<sub>3</sub>) 199.2, 159.4, 142.2, 141.8, 139.9, 130.3, 129.5, 128.5, 128.4, 126.0, 114.0, 72.8, 68.3, 55.4, 31.3, 30.2, 26.0; *m/z* (ESI+) found [M+H]<sup>+</sup> 325.1795. C<sub>21</sub>H<sub>25</sub>O<sub>3</sub><sup>+</sup>: requires 325.1804.

### (*E*)-6-((4-methoxybenzyl)oxy)-3-(4-methylphenyl)hex-3-en-2-one, S16b

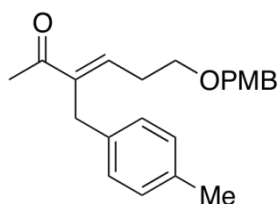

Following general procedure M, reaction of hydroxyketone **S15** (6.0 g, 22.7 mmol) with 4-methylphenyl boronic acid (6.22 g, 45.5 mmol) provided the title compound (6.5 g, 85%, *E:Z* >95:05) as a colorless viscous oil.  $\nu_{\max}$  (film)/cm<sup>-1</sup> 2925, 2830, 1657, 1610, 1513, 1240;  $\delta_{\text{H}}$  (400 MHz, CDCl<sub>3</sub>) 7.27 – 7.23 (m, 2H), 7.02 (s, 4H), 6.91 – 6.86 (m, 2H), 6.79 (t, *J* = 7.0 Hz, 1H), 4.45 (s, 2H), 3.81 (s, 3H), 3.64 (s, 2H), 3.55 (t, *J* = 6.4 Hz, 2H), 2.61 (q, *J* = 6.5 Hz, 2H), 2.29 (d, *J* = 10.5 Hz, 6H);  $\delta_{\text{C}}$  (100 MHz, CDCl<sub>3</sub>) 199.1, 159.3, 142.2, 141.3, 136.6, 135.3, 130.2, 129.3, 129.0, 128.2, 113.8, 72.7, 68.2, 55.3, 30.6, 30.0, 25.9, 21.1; *m/z* (ESI+) found [M+H]<sup>+</sup> 339.1982. C<sub>22</sub>H<sub>27</sub>O<sub>3</sub><sup>+</sup>: requires 339.1960.



**(E)-3-(4-chlorobenzyl)-6-((4-methoxybenzyl)oxy)hex-3-en-2-one, S16c**

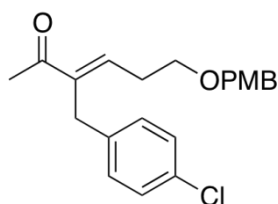

Following general procedure M, reaction of hydroxyketone **S15** (1.0 g, 3.78 mmol) with 4-chlorophenyl boronic acid (1.2 g, 7.57 mmol) provided the title compound (0.97 g, 67%, *E:Z* = >95:05) as a colorless viscous oil.  $\nu_{\max}$  (film)/ $\text{cm}^{-1}$  2858, 2857, 1655, 1612, 1511, 1490, 1245;  $\delta_{\text{H}}$  (400 MHz,  $\text{CDCl}_3$ ) 7.29 – 7.20 (m, 2H), 7.19 – 7.13 (m, 2H), 7.09 – 7.03 (m, 2H), 6.91 – 6.86 (m, 2H), 6.81 (t,  $J$  = 7.0 Hz, 1H), 4.45 (s, 2H), 3.81 (s, 3H), 3.62 (s, 2H), 3.55 (t,  $J$  = 6.3 Hz, 2H), 2.58 (q,  $J$  = 6.5 Hz, 2H), 2.31 (s, 3H);  $\delta_{\text{C}}$  (100 MHz,  $\text{CDCl}_3$ ) 199.0, 159.4, 142.2, 141.8, 138.4, 131.7, 130.2, 129.8, 129.5, 128.5, 114.0, 72.9, 68.2, 55.4, 30.7, 30.2, 25.9;  $m/z$  (ESI+) found  $[\text{M}+\text{H}]^+$  359.1430.  $\text{C}_{21}\text{H}_{24}\text{ClO}_3^+$ : requires 359.1414.

**(E)-3-(4-methoxybenzyl)-6-((4-methoxybenzyl)oxy)hex-3-en-2-one, S16d**

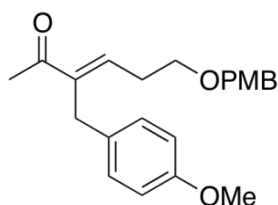

Following general procedure M, reaction of 4 hydroxyketone **S15** (2.0 g, 7.57 mmol) with 4-methoxyphenyl boronic acid (2.3 g, 15.2 mmol) provided the title compound (1.7 g, 63%, *E:Z* >95:05) as a colorless viscous oil.  $\nu_{\max}$  (film)/ $\text{cm}^{-1}$  2933, 2836, 1665, 1611, 1509, 1245;  $\delta_{\text{H}}$  (400 MHz,  $\text{CDCl}_3$ ) 7.28 – 7.22 (m, 2H), 7.08 – 7.03 (m, 2H), 6.89 (dt,  $J$  = 9.5, 2.9 Hz, 2H), 6.82 – 6.72 (m, 3H), 4.45 (s, 2H), 3.81 (s, 3H), 3.75 (s, 3H), 3.61 (s, 2H), 3.55 (t,  $J$  = 6.4 Hz, 2H), 2.61 (q,  $J$  = 6.6 Hz, 2H), 2.30 (s, 3H);  $\delta_{\text{C}}$  (100 MHz,  $\text{CDCl}_3$ ) 199.2, 159.4, 157.9, 142.5, 141.3, 131.9, 130.3, 129.4, 129.3, 113.9, 113.9, 72.8, 68.3, 55.4, 55.3, 30.4, 30.1, 26.0;  $m/z$  (ESI+) found  $[\text{M}+\text{H}]^+$  355.1935.  $\text{C}_{22}\text{H}_{27}\text{O}_4^+$ : requires 355.1909.

General procedure N: Synthesis of hydroxy enones **S17**

**(E)-3-benzyl-6-hydroxyhex-3-en-2-one, S17a**

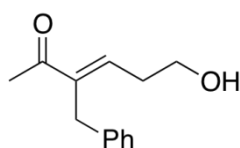

DDQ (19.81 g, 87.29 mmol) was added to a solution of enone **S16a** (23.6 g, 72.74 mmol) in dichloromethane (720 ml) and water (37 ml) at room temperature. The initial green reaction mixture was stirred at room temperature for 16 h. A color change to red-orange was observed within 30 min.

The reaction mixture was then carefully quenched with saturated aqueous NaHCO<sub>3</sub> and filtered through a celite plug with dichloromethane washings (250 ml). The combined organics were washed with water (2 x 150 ml), dried (MgSO<sub>4</sub>) and concentrated. The crude product was purified by chromatography (silica gel, 80:20 hexane:ethyl acetate) to afford the title compound (12.3 g, 83%) as a viscous oil.  $\nu_{\max}$  (film)/cm<sup>-1</sup> 3416, 2924, 1716, 1660, 1494, 1453;  $\delta_{\text{H}}$  (400 MHz, CDCl<sub>3</sub>) 7.27 – 7.20 (m, 2H), 7.15 (dd,  $J$  = 7.6, 6.1 Hz, 3H), 6.85 (t,  $J$  = 7.1 Hz, 1H), 3.82 – 3.64 (m, 4H), 2.59 (q,  $J$  = 6.4 Hz, 2H), 2.34 (s, 3H);  $\delta_{\text{C}}$  (100 MHz, CDCl<sub>3</sub>) 199.2, 142.7, 141.1, 139.8, 128.5, 128.3, 126.0, 61.4, 32.8, 31.3, 25.9;  $m/z$  (ESI+) found [M+H]<sup>+</sup> 205.1230. C<sub>13</sub>H<sub>17</sub>O<sub>2</sub><sup>+</sup>: requires 205.1229.

#### (*E*)-6-hydroxy-3-(4-methylbenzyl)hex-3-en-2-one, **S17b**

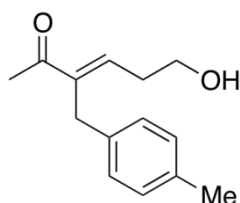

Following general procedure N, reaction of enone **S16b** (5.9 g, 17.54 mmol) provided the title compound (3.5 g, 91%) as a viscous oil.  $\nu_{\max}$  (film)/cm<sup>-1</sup> 3425, 2924, 1718, 1662, 1513;  $\delta_{\text{H}}$  (400 MHz, CDCl<sub>3</sub>) 7.10 – 6.97 (m, 4H), 6.83 (t,  $J$  = 7.1 Hz, 1H), 3.76 (q,  $J$  = 6.1 Hz, 2H), 3.66 (s, 2H), 2.58 (q,  $J$  = 6.5 Hz, 2H), 2.36 – 2.23 (m, 6H);  $\delta_{\text{C}}$  (100 MHz, CDCl<sub>3</sub>) 199.3, 142.8, 141.0, 136.7, 135.5, 129.2, 128.2, 61.4, 32.7, 30.8, 25.9, 21.1;  $m/z$  (ESI+) found [M+H]<sup>+</sup> 219.1370. C<sub>14</sub>H<sub>19</sub>O<sub>2</sub><sup>+</sup>: requires 219.1385.

#### (*E*)-6-hydroxy-3-(4-chlorobenzyl)hex-3-en-2-one, **S17c**

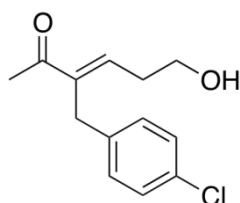

Following general procedure N, reaction of enone **S16c** (6.95 g, 19.4 mmol) provided the title compound (4.0 g, 86%) as a viscous oil.  $\nu_{\max}$  (film)/cm<sup>-1</sup> 3432, 2938, 1719, 1664, 1490;  $\delta_{\text{H}}$  (400 MHz, CDCl<sub>3</sub>) 7.23 – 7.14 (m, 2H), 7.07 (d,  $J$  = 8.3 Hz, 2H), 6.85 (t,  $J$  = 7.1 Hz, 1H), 3.77 (q,  $J$  = 5.7 Hz, 2H), 3.65 (s, 2H), 2.56 (q,  $J$  = 6.5 Hz, 2H), 2.33 (s, 3H), 1.79 (s, 1H);  $\delta_{\text{C}}$  (100 MHz, CDCl<sub>3</sub>) 199.1, 142.3, 141.6, 138.3, 131.7, 129.7, 128.5, 61.3, 32.7, 30.7, 25.9;  $m/z$  (ESI+) found [M+H]<sup>+</sup> 239.0825. C<sub>13</sub>H<sub>16</sub>ClO<sub>2</sub><sup>+</sup>: requires 239.0839.

**(E)-6-hydroxy-3-(4-methoxybenzyl)hex-3-en-2-one, S17d**

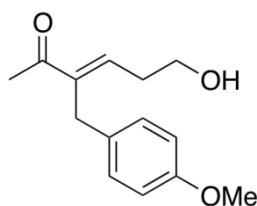

Following general procedure N, reaction of enone **S16d** (5.0 g, 14.3 mmol) provided the title compound (2.87 g, 86%) as a viscous oil.  $\nu_{\max}$  (film)/ $\text{cm}^{-1}$  3421, 2935, 2836, 1660, 1509;  $\delta_{\text{H}}$  (400 MHz,  $\text{CDCl}_3$ ) 7.09 – 7.03 (m, 2H), 6.85 – 6.74 (m, 3H), 3.79 – 3.74 (m, 5H), 3.63 (s, 2H), 2.59 (q,  $J = 6.5$  Hz, 2H), 2.32 (s, 3H);  $\delta_{\text{C}}$  (100 MHz,  $\text{CDCl}_3$ ) 199.3, 157.9, 143.0, 140.8, 131.8, 129.3, 113.9, 61.5, 55.3, 32.8, 30.4, 26.0;  $m/z$  (ESI+) found  $[\text{M}+\text{H}]^+$  235.1330.  $\text{C}_{14}\text{H}_{19}\text{O}_3^+$ : requires 235.1334.

General procedure O: Synthesis of azido enones

**(E)-6-azido-3-benzylhex-3-en-2-one, S18a**

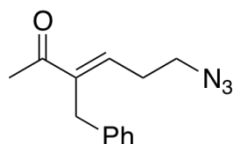

In a flame dried round bottom flask flushed with argon,  $\text{Zn}(\text{N}_3)_2 \cdot \text{Pyr}$  (36.0 g, 118 mmol) and triphenyl phosphine (30.7 g, 118 mmol) were weighed. A solution of alcohol **S17a** (12.0 g, 58.8 mmol) in anhydrous toluene (150 ml) was added. The flask was to  $-78$  °C, then diisopropyl azodicarboxylate (22.6 ml, 118 mmol) was added to dropwise and the reaction mixture warmed to room temperature and stirred for 16 h. On completion the reaction mixture was filtered through a celite plug and the toluene removed under reduced pressure. The crude reaction mixture was diluted with ethyl acetate (150 ml) and washed with water (2 x 100 ml) and brine (100 ml), dried ( $\text{MgSO}_4$ ) and concentrated. The crude product was purified by chromatography (silica gel, 90:10 hexane:ethyl acetate) to afford the title compound (8.35 g, 62%) as pale yellow viscous oil.  $\nu_{\max}$  (film)/ $\text{cm}^{-1}$  3028, 2925, 2100, 1709, 1664, 1494;  $\delta_{\text{H}}$  (400 MHz,  $\text{CDCl}_3$ ) 7.29 – 7.22 (m, 2H), 7.19 – 7.10 (m, 3H), 6.74 (t,  $J = 7.1$  Hz, 1H), 3.71 (s, 2H), 3.39 (t,  $J = 6.7$  Hz, 2H), 2.59 (q,  $J = 6.8$  Hz, 2H), 2.35 (s, 3H);  $\delta_{\text{C}}$  (100 MHz,  $\text{CDCl}_3$ ) 198.8, 143.0, 139.6, 139.4, 128.5, 128.2, 126.1, 50.1, 31.2, 29.0, 25.9;  $m/z$  (ESI+) found  $[\text{2M}+\text{H}]^+$  459.2500.  $\text{C}_{26}\text{H}_{31}\text{N}_6\text{O}_2^+$ : requires 459.2508.

**(E)-6-azido-3-(4-methylbenzyl)hex-3-en-2-one, S18b**

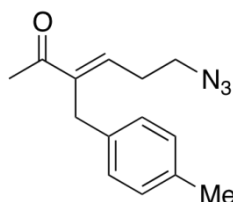

Following general procedure O, reaction of alcohol **S17b** (3.4 g, 15.6 mmol) provided the title compound (2.65 g, 70%) as a viscous oil.  $\nu_{\max}$  (film)/ $\text{cm}^{-1}$  2928, 2092, 1695, 1671, 1513;  $\delta_{\text{H}}$  (400 MHz,  $\text{CDCl}_3$ ) 7.04 (q,  $J = 8.1$  Hz, 4H), 6.71 (t,  $J = 7.1$  Hz, 1H), 3.67 (s, 2H), 3.39 (t,  $J = 6.8$  Hz, 2H), 2.59 (q,  $J = 6.8$  Hz, 2H), 2.39 – 2.24 (m, 6H);  $\delta_{\text{C}}$  ( $^{13}\text{C}$  NMR (100 MHz,  $\text{CDCl}_3$ )  $\delta$  198.9, 143.3, 139.4, 136.4, 135.7, 129.3, 128.2, 50.3, 30.9, 29.2, 26.0, 21.1;  $m/z$  (ESI+) found  $[2\text{M}+\text{H}]^+$  487.2831.  $\text{C}_{28}\text{H}_{35}\text{N}_6\text{O}_2^+$ : requires 487.2821.

**(E)-6-azido-3-(4-chlorobenzyl)hex-3-en-2-one, S18c**

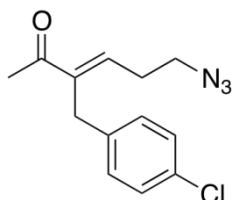

Following general procedure O, reaction of alcohol **S17c** (4.0 g, 16.75 mmol) provided the title compound (2.69 g, 61%) as a viscous oil.  $\nu_{\max}$  (film)/ $\text{cm}^{-1}$  2929, 2102, 1701, 1665, 1490;  $\delta_{\text{H}}$  (400 MHz,  $\text{CDCl}_3$ ) 7.24 – 7.19 (m, 2H), 7.09 – 7.03 (m, 2H), 6.74 (t,  $J = 7.1$  Hz, 1H), 3.66 (s, 2H), 3.42 (t,  $J = 6.7$  Hz, 2H), 2.58 (q,  $J = 6.8$  Hz, 2H), 2.34 (s, 3H);  $\delta_{\text{C}}$  (100 MHz,  $\text{CDCl}_3$ ) 198.7, 142.8, 140.1, 138.0, 132.0, 129.7, 128.7, 50.2, 30.7, 29.2, 25.9;  $m/z$  (ESI+) found  $[\text{M}+\text{H}]^+$  264.0910.  $\text{C}_{13}\text{H}_{15}\text{ClN}_3\text{O}^+$ : requires 264.0904.

**(E)-6-azido-3-(4-methoxybenzyl)hex-3-en-2-one, S18d**

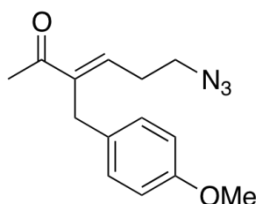

Following general procedure O, reaction of alcohol **S17d** (2.87 g, 12.24 mmol) provided the title compound (1.95 g, 65%) as a viscous oil.  $\nu_{\max}$  (film)/ $\text{cm}^{-1}$  2932, 2836, 2100, 1709, 1664, 1609, 1509;  $\delta_{\text{H}}$  (400 MHz,  $\text{CDCl}_3$ ) 7.07 – 7.02 (m, 2H), 6.82 – 6.76 (m, 2H), 6.70 (t,  $J = 7.1$  Hz, 1H), 3.76 (s, 3H), 3.64 (s, 2H), 3.39 (t,  $J = 6.8$  Hz, 2H), 2.59 (q,  $J = 6.8$  Hz, 2H), 2.33 (s, 3H);  $\delta_{\text{C}}$  (100 MHz,  $\text{CDCl}_3$ ) 199.0, 158.0, 143.5, 139.3, 131.5, 129.3, 114.0, 55.4, 50.3, 30.5, 29.1, 26.0;  $m/z$  (ESI+) found  $[\text{M}+\text{H}]^+$  260.1385.  $\text{C}_{14}\text{H}_{18}\text{N}_3\text{O}_2^+$ : requires 260.1399.

General procedure P: Diels Alder/ Schmidt reaction with silyloxy dienes derived from  $\alpha$ -benzyl enones

**(3a*S*,4*R*,7a*R*)-1-acetyl-4-benzyl-4,5,6,7-tetrahydro-5*H*-indolizino[1,2-*b*]pyridin-2(1*H*)-one, **18a****

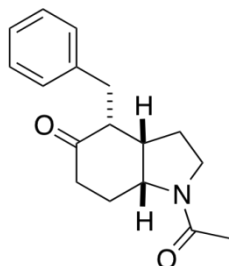

Triethylamine (1.83 ml, 13.1 mmol) was added to a solution of enone **S18a** (1.50 g, 6.55 mmol) in anhydrous diethyl ether (15 ml) at 0 °C under argon. TBSOTf (2.26 ml, 9.82 mmol) was then added dropwise to afford a white turbid solution. The reaction mixture was stirred for 30 min at 0 °C, then quenched with saturated aqueous NaHCO<sub>3</sub> (50 ml). The mixture was extracted with diethyl ether (50 ml), dried (MgSO<sub>4</sub>) and concentrated to afford the corresponding silyloxydiene **17a** (2.31 g) which was used without any purification.

The crude silyloxydiene was transferred to a flame-dried argon-flushed flask and dissolved in anhydrous dichloromethane (15 ml). Methyl vinyl ketone (0.37 ml, 4.51 mmol) was added and the reaction mixture cooled to -78 °C. Boron trifluoride diethyl etherate (0.86 ml, 6.76 mmol) was then added and the reaction mixture stirred at -78 °C for 4 h then warmed to room temperature. A further aliquot of boron trifluoride diethyl etherate (1.14 ml, 9.02 mmol) was then added and the reaction mixture stirred at room temperature for an additional 16 h. The reaction mixture was diluted with dichloromethane (100 ml) and quenched with saturated aqueous NaHCO<sub>3</sub> (100 ml). The organic layer was washed with saturated aqueous NH<sub>4</sub>Cl (50 ml), water (50 ml) and brine (100 ml), dried (MgSO<sub>4</sub>) and concentrated. The crude product was purified by automated column chromatography (4 g silica column, 0 to 100% EtOAc in hexanes, then 90:10 dichloromethane:methanol) to afford the title compound (672 mg, 55%, *endo:exo* = 4:1) as yellow viscous oil.  $\nu_{\max}$  (film)/cm<sup>-1</sup> 2935, 1710, 1635, 1420;  $\delta_{\text{H}}$  (400 MHz, CDCl<sub>3</sub>, major diastereomer) 7.31 – 7.14 (m, 5H), 3.63 – 3.51 (m, 2H), 3.43 (td, *J* = 10.7, 6.1 Hz, 1H), 3.29 – 3.13 (m, 2H), 2.67 (m, 2H), 2.55 – 2.38 (m, 2H), 2.02 (s, 3H), 1.96 – 1.74 (m, 2H), 1.59 – 1.36 (m, 2H);  $\delta_{\text{C}}$  (100 MHz, CDCl<sub>3</sub>, major diastereomer) 209.7, 171.0, 140.3, 129.2, 128.5, 126.3, 62.3, 55.4, 50.6, 49.4, 39.5, 33.6, 29.3, 29.1, 23.2; *m/z* (ESI+) found [M+H]<sup>+</sup> 272.1545. C<sub>17</sub>H<sub>22</sub>NO<sub>2</sub><sup>+</sup>: requires 272.1651.

**(3a*S*,4*R*,7a*R*)-1-acetyl-4-(4-methylbenzyl)octahydro-5*H*-indol-5-one, 18b**

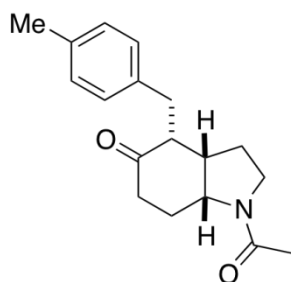

Following general procedure P, reaction of enone **S18b** (4.20 g, 17.3 mmol) provided the title compound (1.68 g, 53%, *endo:exo* = 4:1) as a yellow viscous oil.  $\nu_{\max}$  (film)/ $\text{cm}^{-1}$  2937, 1711, 1630, 1414;  $\delta_{\text{H}}$  (400 MHz,  $\text{CDCl}_3$ , major diastereomer) 7.12 – 7.02 (m, 4H), 3.58 – 3.45 (m, 1H), 3.40 – 3.27 (m, 1H), 3.20 (dt,  $J$  = 14.3, 5.0 Hz, 1H), 3.12 – 2.96 (m, 1H), 2.73 – 2.52 (m, 2H), 2.51 – 2.19 (m, 6H), 2.14 – 1.92 (m, 5H), 1.91 – 1.64 (m, 2H);  $\delta_{\text{C}}$  (100 MHz,  $\text{CDCl}_3$ , major diastereomer) 211.5, 169.3, 136.2, 129.3, 128.9, 128.5, 54.9, 50.5, 46.5, 42.5, 37.7, 32.2, 27.0, 25.8, 22.3, 21.0;  $m/z$  (ESI+) found  $[\text{M}+\text{H}]^+$  286.1825.  $\text{C}_{18}\text{H}_{24}\text{NO}_2^+$ : requires 286.1807.

**(3a*S*,4*R*,7a*R*)-1-acetyl-4-(4-chlorobenzyl)octahydro-5*H*-indol-5-one, 18c**

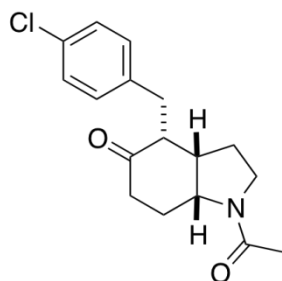

Following general procedure P, reaction of enone **S18c** (5.60 g, 21.2 mmol) provided the title compound (2.72 g, 64%, *endo:exo* = 3:1) as a yellow viscous oil.  $\nu_{\max}$  (film)/ $\text{cm}^{-1}$  2947, 1711, 1631, 1492, 1414;  $\delta_{\text{H}}$  (400 MHz,  $\text{CDCl}_3$ , major diastereomer) 7.24 (d,  $J$  = 7.7 Hz, 2H), 7.11 (d,  $J$  = 7.7 Hz, 2H), 3.53–3.50 (m, 1H), 3.35 (m, 2H), 3.25 – 3.16 (m, 2H), 3.09 (dd,  $J$  = 13.4, 6.0 Hz, 1H), 3.01 (dt,  $J$  = 8.6, 6.0 Hz, 1H), 2.74 – 2.53 (m, 2H), 2.51 – 2.20 (m, 2H), 2.12 – 1.96 (m, 3H), 1.96 – 1.57 (m, 2H);  $\delta_{\text{C}}$  (100 MHz,  $\text{CDCl}_3$ , major diastereomer) 211.1, 169.4, 137.9, 130.5, 130.2, 128.8, 54.9, 50.5, 46.5, 43.0, 37.8, 32.3, 27.2, 25.9, 22.4;  $m/z$  (ESI+) found  $[\text{M}+\text{H}]^+$  306.1277.  $\text{C}_{17}\text{H}_{21}\text{ClNO}_2^+$ : requires 306.1216.

**(3a*S*,4*R*,7a*R*)-1-acetyl-4-(4-methoxybenzyl)octahydro-5*H*-indol-5-one, 18d**

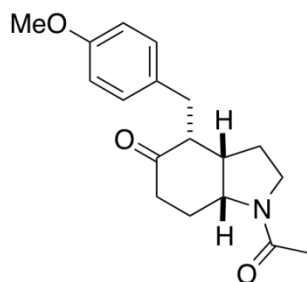

Following general procedure P, reaction of enone **S18d** (3.20 g, 12.3 mmol) provided the title compound (1.50 g, 60%, *endo:exo* = 4:1) as a yellow viscous oil.  $\nu_{\max}$  (film)/ $\text{cm}^{-1}$  2944, 1710, 1629, 1511, 1244;  $\delta_{\text{H}}$  (400 MHz,  $\text{CDCl}_3$ , major diastereomer) 7.08 (d,  $J$  = 8.5 Hz, 2H), 6.81 (d,  $J$  = 8.5 Hz, 2H), 3.76 (s, 3H), 3.60 – 3.44 (m, 2H), 3.41 – 3.25 (m, 1H), 3.17 (dt,  $J$  = 14.4, 4.8 Hz, 1H), 3.10 – 2.93 (m, 1H), 2.73 – 2.51 (m, 2H), 2.51 – 2.17 (m, 4H), 2.15 – 1.92 (m, 3H), 1.90 – 1.53 (m, 2H);  $\delta_{\text{C}}$  (100 MHz,  $\text{CDCl}_3$ , major diastereomer) 211.6, 169.3, 158.2, 130.1, 129.7, 114.1, 114.0, 55.3, 54.9, 50.7, 46.5, 42.7, 37.8, 31.8, 27.2, 25.9;  $m/z$  (ESI+) found  $[\text{M}+\text{H}]^+$  302.1768.  $\text{C}_{18}\text{H}_{24}\text{NO}_3^+$ : requires 302.1756.

General procedure Q. Synthesis of silyloxydiene

**(*E*)-((3-benzyl-6-((4-methoxybenzyl)oxy)hexa-1,3-dien-2-yl)oxy)(*tert*-butyl)dimethylsilane, 22a**

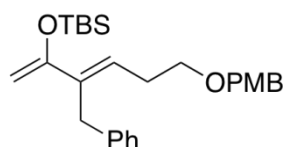

Triethylamine (0.43 ml, 3.08 mmol) was added to a solution of enone **S16a** (500 mg, 1.54 mmol) in anhydrous diethyl ether (5 ml) at 0 °C under argon. TBSOTf (0.53 ml, 2.31 mmol) was then added dropwise. The reaction mixture was stirred for 20 min at 0 °C then diluted with ether, washed with saturated aqueous  $\text{NaHCO}_3$ , dried ( $\text{MgSO}_4$ ) and concentrated. The crude product was purified by chromatography (basic alumina, 96:4 hexanes:ethyl acetate) to afford the title compound (603 mg, 89%) as a colorless viscous oil.  $\nu_{\max}$  (film)/ $\text{cm}^{-1}$  2930, 2856, 1600, 1512, 1246;  $\delta_{\text{H}}$  (400 MHz,  $\text{CDCl}_3$ ) 7.28 – 7.19 (m, 4H), 7.19 – 7.11 (m, 3H), 6.89 – 6.83 (m, 2H), 6.29 (t,  $J$  = 7.3 Hz, 1H), 4.42 (s, 2H), 4.39 – 4.22 (m, 2H), 3.80 (s, 3H), 3.61 (s, 2H), 3.50 (t,  $J$  = 6.8 Hz, 2H), 2.47 (q,  $J$  = 7.0 Hz, 2H), 0.96 (s, 9H), 0.17 – 0.09 (ms, 6H);  $\delta_{\text{C}}$  (100 MHz,  $\text{CDCl}_3$ ) 159.2, 156.4, 140.1, 135.4, 130.7, 129.4, 128.4, 128.0, 127.1, 125.9, 113.9, 93.1, 72.8, 69.6, 55.4, 33.5, 29.4, 26.1, 18.5, -4.5;  $m/z$  (ESI+) found  $[\text{M}+\text{H}]^+$  439.2650.  $\text{C}_{27}\text{H}_{39}\text{O}_3\text{Si}^+$ : requires 439.2668.

**(*E*-tert-butyl((6-((4-methoxybenzyl)oxy)-3-(4-methylbenzyl)hexa-1,3-dien-2-yl)oxy)dimethylsilane, 22b**

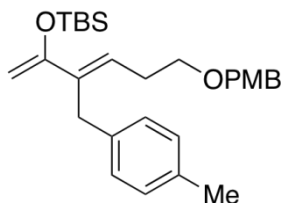

Following general procedure Q, reaction of enone **S16b** (0.79 g, 2.02 mmol) provided the title compound (800 mg, 86%) as a colorless viscous oil.  $\nu_{\max}$  (film)/ $\text{cm}^{-1}$  2929, 2856, 1612, 1512, 1246;  $\delta_{\text{H}}$  (400 MHz,  $\text{CDCl}_3$ ) 7.15 – 7.08 (m, 2H), 6.95 – 6.88 (m, 4H), 6.74 (dd,  $J = 6.7, 2.1$  Hz, 2H), 6.15 (t,  $J = 7.3$  Hz, 1H), 4.29 (s, 2H), 4.25 – 4.08 (m, 2H), 3.67 (s, 3H), 3.44 (s, 2H), 3.37 (t,  $J = 6.8$  Hz, 2H), 2.34 (q,  $J = 7.0$  Hz, 2H), 2.16 (s, 3H), 0.83 (s, 9H), 0.02 – 0.03 (s, 6H);  $\delta_{\text{C}}$  (100 MHz,  $\text{CDCl}_3$ ) 159.2, 156.4, 137.0, 135.5, 135.3, 130.7, 129.4, 129.1, 127.8, 127.0, 113.9, 93.0, 72.8, 69.6, 55.4, 33.0, 29.3, 26.1, 21.1, 18.5, -4.5;  $m/z$  (ESI+) found  $[\text{M}+\text{H}]^+$  453.2842.  $\text{C}_{28}\text{H}_{41}\text{SiO}_3^+$ : requires 453.2825.

**(*E*-tert-butyl((3-(4-chlorobenzyl)-6-((4-methoxybenzyl)oxy)hexa-1,3-dien-2-yl)oxy)dimethylsilane, 22c**

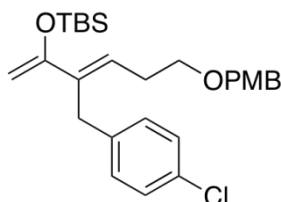

Following general procedure Q, reaction of enone **S16c** (321 mg, 0.89 mmol) provided the title compound (380 mg, 90%) as a colorless viscous oil.  $\nu_{\max}$  (film)/ $\text{cm}^{-1}$  2930, 2856, 1612, 1595, 1512, 1247;  $\delta_{\text{H}}$  (400 MHz,  $\text{CDCl}_3$ ) 7.29 – 7.22 (m, 2H), 7.21 – 7.15 (m, 2H), 7.13 – 7.06 (m, 2H), 6.87 (dd,  $J = 6.6, 2.0$  Hz, 2H), 6.29 (t,  $J = 7.3$  Hz, 1H), 4.42 (s, 2H), 4.32 – 4.21 (m, 2H), 3.81 (s, 3H), 3.56 (s, 2H), 3.54 – 3.44 (m, 2H), 2.45 (q,  $J = 6.9$  Hz, 2H), 0.96 (s, 9H), 0.18 (s, 6H);  $\delta_{\text{C}}$  (100 MHz,  $\text{CDCl}_3$ ) 159.3, 156.2, 138.6, 135.1, 129.5, 129.4, 128.5, 127.6, 113.9, 93.0, 72.9, 69.5, 65.8, 55.4, 32.8, 29.4, 26.0, 17.2, 14.3, -4.5; HRMS calcd. for  $\text{C}_{27}\text{H}_{38}\text{ClO}_3\text{Si}^+$ : 473.2279 Found: 473.2277.

**(*E*-tert-butyl((3-(4-methoxybenzyl)-6-((4-methoxybenzyl)oxy)hexa-1,3-dien-2-yl)oxy)dimethylsilane, 22d**

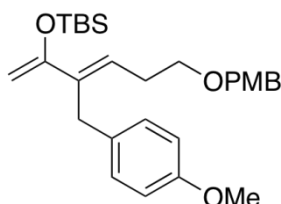



Following general procedure Q, reaction of enone **S16d** (356 mg, 1.0 mmol) provided the title compound (450 mg, 96%) as a colorless viscous oil.  $\nu_{\max}$  (film)/ $\text{cm}^{-1}$  2931, 2856, 1611, 1510, 1243;  $\delta_{\text{H}}$  (400 MHz,  $\text{CDCl}_3$ ) 7.28 – 7.22 (t,  $J = 2.4$  Hz, 2H), 7.11 – 7.05 (d,  $J = 8.7$  Hz, 2H), 6.90 – 6.84 (m, 2H), 6.79 – 6.75 (m, 2H), 6.30 – 6.23 (t,  $J = 7.3$  Hz, 1H), 4.45 – 4.41 (s, 2H), 4.38 – 4.22 (m, 2H), 3.83 – 3.74 (d,  $J = 15.9$  Hz, 6H), 3.58 – 3.44 (m, 4H), 2.52 – 2.43 (q,  $J = 7.0$  Hz, 2H), 1.01 – 0.93 (s, 9H), 0.15 – 0.11 (m, 6H);  $\delta_{\text{C}}$  (100 MHz,  $\text{CDCl}_3$ ) 159.2, 157.8, 156.4, 135.8, 132.1, 130.7, 129.4, 128.9, 126.9, 113.9, 113.8, 93.0, 72.8, 66.0, 55.4, 55.4, 32.6, 29.3, 26.1, 18.4, -5.6;  $m/z$  (ESI+) found  $[\text{M}+\text{H}]^+$  469.2754.  $\text{C}_{28}\text{H}_{41}\text{SiO}_4^+$ : requires 469.2774.

#### General procedure R: Diels Alder reaction of cyclobutenone with silyloxydienes

##### **(1R,5S,6S)-4-benzyl-3-((*tert*-butyldimethylsilyl)oxy)-5-(2-((4-methoxybenzyl)oxy)ethyl)bicyclo[4.2.0]oct-3-en-7-one, 23a**

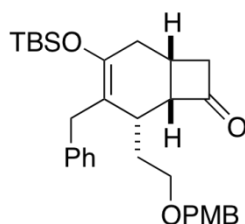

Diisopropylamine (0.53 ml, 2.97 mol) was added dropwise to a solution of 3-bromocyclobutan-1-one<sup>66</sup> (400 mg, 2.70 mmol) in anhydrous acetonitrile (1 ml) at 0 °C under argon. The solution was stirred at 0 °C for 1 h when  $^1\text{H}$  NMR analysis of an aliquot showed complete consumption of bromobutanone and formation of cyclobut-2-en-1-one. To this flask was added a solution of silyloxydiene **22a** (400 mg, 0.92 mmol) in acetonitrile (1 ml) followed by  $\text{ZnCl}_2$  (1.35 ml, 1.0 M solution in  $\text{Et}_2\text{O}$ ). The reaction mixture was then heated at 45 °C for 24 h, then another equivalent of cyclobut-2-en-1-one (0.92 mmol) (prepared separately as described above) was added. The reaction mixture was heated at 45 °C for an additional 24h, then cooled to room temperature and diluted with diethyl ether. The organic layer was washed with saturated aqueous  $\text{NaHCO}_3$  (50 ml) and water (2 x 50 ml), dried ( $\text{MgSO}_4$ ) and concentrated. The crude product was purified by chromatography (basic alumina, 95:5 hexane:ethyl acetate) to afford the title compound (350 mg, 75%) as a colorless viscous oil.  $\nu_{\max}$  (film)/ $\text{cm}^{-1}$  2925, 2860, 1710, 1651, 1613, 1507, 1246;  $\delta_{\text{H}}$  (400 MHz,  $\text{CDCl}_3$ ) 7.25 – 7.20 (m, 2H), 7.19 – 7.08 (m, 5H), 6.88 – 6.82 (m, 2H), 4.31 – 4.22 (m, 2H), 3.92 – 3.84 (d,  $J = 15.4$  Hz, 1H), 3.83 – 3.77 (s, 3H), 3.53 – 3.39 (m, 3H), 3.23 – 3.08 (m, 2H), 2.82 – 2.71 (m, 1H), 2.66 – 2.51 (m, 3H), 2.34 – 2.23 (m, 1H), 1.91 – 1.83 (m, 2H), 0.90 – 0.87 (s, 9H), 0.14 (s, 3H), 0.09 (s, 3H);  $\delta_{\text{C}}$  (100 MHz,  $\text{CDCl}_3$ ) 212.2, 159.2, 145.5, 141.2, 130.7, 129.4, 128.4, 128.3, 125.6, 116.8, 113.8, 72.1, 67.9, 60.6, 55.4, 51.8, 33.7, 33.5, 32.7, 29.1, 25.9, 23.4, 18.2, -3.4, -3.3.  $m/z$  (ESI+) found  $[\text{M}+\text{H}]^+$  507.2925.  $\text{C}_{31}\text{H}_{43}\text{O}_4\text{Si}^+$ : requires 507.2931.

**(1*R*,5*S*,6*S*)-3-((*tert*-butyldimethylsilyl)oxy)-5-(2-((4-methoxybenzyl)oxy)ethyl)-4-(4-methylbenzyl)bicyclo[4.2.0]oct-3-en-7-one, 23b**

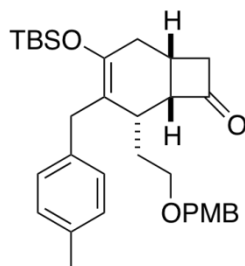

Following general procedure R, reaction of silyloxydiene **22b** (300 mg, 0.66 mmol) provided the title compound (252 mg, 72%) as a colorless viscous oil.  $\nu_{\max}$  (film)/ $\text{cm}^{-1}$  2930, 2857, 1713, 1650, 1612, 1511, 1246;  $\delta_{\text{H}}$  (400 MHz,  $\text{CDCl}_3$ ) 7.18 – 7.13 (m, 2H), 7.05 – 6.96 (q,  $J = 8.0$  Hz, 4H), 6.87 – 6.81 (m, 2H), 4.35 – 4.19 (m, 2H), 3.83 – 3.75 (s, 4H), 3.51 – 3.38 (m, 3H), 3.17 – 3.05 (ddd,  $J = 17.9, 8.8, 3.9$  Hz, 2H), 2.81 – 2.68 (m, 1H), 2.66 – 2.49 (m, 3H), 2.34 – 2.26 (s, 4H), 1.94 – 1.80 (q,  $J = 7.5, 6.9$  Hz, 2H), 0.88 (s, 9H), 0.14 (s, 3H), 0.09 (s, 3H);  $\delta_{\text{C}}$  (100 MHz,  $\text{CDCl}_3$ ) 212.3, 159.2, 145.3, 138.0, 135.0, 130.8, 129.4, 129.0, 128.3, 117.1, 113.8, 72.1, 68.0, 60.7, 55.4, 51.8, 33.7, 33.5, 32.3, 29.1, 25.9, 23.4, 21.2, 18.2, -3.3, -3.4;  $m/z$  (ESI+) found  $[\text{M}+\text{H}]^+$  521.3093.  $\text{C}_{32}\text{H}_{45}\text{O}_4\text{Si}^+$ : requires 521.3087.

**(1*R*,5*S*,6*S*)-3-((*tert*-butyldimethylsilyl)oxy)-4-(4-chlorobenzyl)-5-(2-((4-methoxybenzyl)oxy)ethyl)bicyclo[4.2.0]oct-3-en-7-one, 23c**

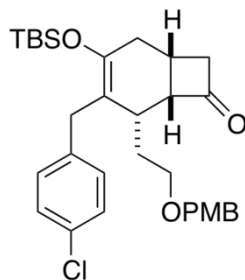

Following general procedure R, reaction of silyloxydiene **22c** (205mg, 1.39 mmol) provided the title compound (265 mg, 68%) as a colorless viscous oil.  $\nu_{\max}$  (film)/ $\text{cm}^{-1}$  2930, 2856, 1773, 1650, 1612, 1512, 1246;  $\delta_{\text{H}}$  (400 MHz,  $\text{CDCl}_3$ ) 7.23 – 7.12 (m, 4H), 7.02 (d,  $J = 8.4$  Hz, 2H), 6.89 – 6.82 (m, 2H), 4.38 – 4.23 (m, 2H), 3.80 (s, 4H), 3.53 – 3.39 (m, 3H), 3.21 – 3.06 (m, 2H), 2.82 – 2.70 (m, 1H), 2.66 – 2.48 (m, 3H), 2.27 (dd,  $J = 15.5, 3.3$  Hz, 1H), 1.92 – 1.73 (m, 2H), 0.87 (s, 9H), 0.21 – 0.06 (m, 6H);  $\delta_{\text{C}}$  (125 MHz,  $\text{CDCl}_3$ ) 212.3, 159.2, 145.8, 139.7, 131.3, 130.6, 129.7, 129.4, 128.4, 116.3, 113.8, 72.3, 67.8, 60.6, 55.4, 51.8, 33.6, 33.5, 32.0, 29.1, 25.8, 23.3, 18.2, -3.3, -3.2;  $m/z$  (ESI+) found  $[\text{M}+\text{H}]^+$  541.2556.  $\text{C}_{31}\text{H}_{42}\text{ClO}_4\text{Si}^+$ : requires 541.2541.

**(1*R*,5*S*,6*S*)-3-((*tert*-butyldimethylsilyloxy)-4-(4-methoxybenzyl)-5-(2-((4-methoxybenzyl)oxy)ethyl)bicyclo[4.2.0]oct-3-en-7-one, **23d****

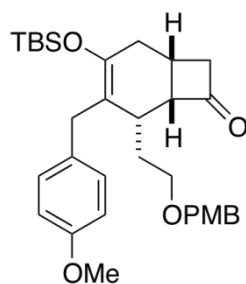

Following general procedure R, reaction of silyloxydiene **22d** (164mg, 1.11 mmol) provided the title compound (164mg, 55%) as a colorless viscous oil.  $\nu_{\max}$  (film)/ $\text{cm}^{-1}$  2931, 2856, 1773, 1650, 1611, 1508;  $\delta_{\text{H}}$  (400 MHz,  $\text{CDCl}_3$ ) 7.19 – 7.14 (m, 2H), 7.01 (d,  $J = 8.6$  Hz, 2H), 6.87 – 6.82 (m, 2H), 6.80 – 6.74 (m, 2H), 4.36 – 4.21 (m, 2H), 3.78 (d,  $J = 14.1$  Hz, 7H), 3.57 – 3.37 (m, 4H), 3.18 – 3.04 (m, 2H), 2.74 (dt,  $J = 15.3, 5.8$  Hz, 1H), 2.66 – 2.47 (m, 3H), 2.26 (dd,  $J = 15.5, 3.6$  Hz, 1H), 1.86 (q,  $J = 6.5$  Hz, 2H), 0.89 (s, 9H), 0.18 – 0.04 (m, 6H);  $\delta_{\text{C}}$  (125 MHz,  $\text{CDCl}_3$ ) 212.4, 159.2, 157.7, 145.2, 133.1, 130.7, 129.4, 129.3, 117.2, 113.8, 113.7, 72.2, 68.0, 60.6, 55.4, 55.3, 51.8, 33.7, 33.5, 31.8, 29.1, 25.9, 23.4, 18.2, -3.3, -3.4;  $m/z$  (ESI+) found  $[\text{M}+\text{H}]^+$  537.3040.  $\text{C}_{32}\text{H}_{46}\text{O}_5\text{Si}^+$ : requires 537.3036.

General procedure S: synthesis of tetrahydroisochromenones

**(4*aS*,5*S*)-5-benzyl-1-methyl-3,4,4*a*,5-tetrahydro-6*H*-isochromen-6-one, **24a****

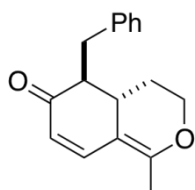

Trifluoromethane sulfonic acid (17.7  $\mu\text{l}$ , 0.2 mmol) was added to a solution of silyl enol ether **23a** (51.0 mg, 0.2 mmol) in dichloromethane (1 ml) at room temperature. The reaction mixture was stirred at room temperature for 2 h then loaded directly onto a silica gel column and eluted with 80:20 hexanes:ethyl acetate to afford the title compound (34.0 mg, 67%) as an colorless oil.  $\nu_{\max}$  (film)/ $\text{cm}^{-1}$  2926, 1658, 1612, 1495, 1278;  $\delta_{\text{H}}$  (400 MHz,  $\text{CDCl}_3$ ) 7.25 – 7.21 (m, 6H), 5.79 (d,  $J = 9.8$  Hz, 1H), 4.27 (ddd,  $J = 10.9, 3.9, 2.3$  Hz, 1H), 3.98 – 3.65 (m, 1H), 3.32 – 3.06 (m, 2H), 2.53 (dt,  $J = 12.3, 6.8$  Hz, 1H), 2.46 – 2.38 (m, 1H), 2.19 (ddt,  $J = 13.6, 4.7, 2.0$  Hz, 1H), 1.97 (d,  $J = 1.5$  Hz, 3H), 1.67 (tdd,  $J = 12.9, 11.2, 3.9$  Hz, 1H);  $\delta_{\text{C}}$  (100 MHz,  $\text{CDCl}_3$ ) 199.0, 157.7, 143.9, 140.4, 129.5, 128.4, 126.0, 121.6, 108.3, 66.4, 52.4, 34.9, 31.6, 29.2, 17.0;  $m/z$  (ESI+) found  $[\text{M}+\text{H}]^+$  255.1365.  $\text{C}_{17}\text{H}_{19}\text{O}_2^+$ : requires 255.1385.

**(4a*S*,5*S*)-1-methyl-5-(4-methylbenzyl)-3,4,4a,5-tetrahydro-6*H*-isochromen-6-one, 24b**

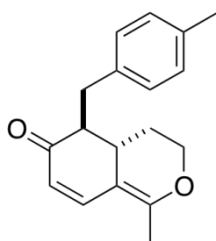

Following general procedure S, reaction of silyl enol ether **23b** (53.6 mg, 0.2 mmol) provided the title compound (35.0 mg, 65%) as a colorless viscous oil.  $\nu_{\max}$  (film)/ $\text{cm}^{-1}$  2927, 1656, 1610, 1510, 1243;  $\delta_{\text{H}}$  (500 MHz,  $\text{CDCl}_3$ ) 7.24 (d,  $J = 9.8$  Hz, 1H), 7.13 – 7.08 (m, 2H), 7.07 – 7.01 (m, 2H), 5.79 (d,  $J = 9.8$  Hz, 1H), 4.27 (ddd,  $J = 10.9, 3.9, 2.3$  Hz, 1H), 3.87 – 3.73 (m, 1H), 3.22 (dd,  $J = 14.6, 3.8$  Hz, 1H), 3.06 (dd,  $J = 14.6, 5.4$  Hz, 1H), 2.58 – 2.48 (m, 1H), 2.38 (ddd,  $J = 13.7, 5.3, 3.9$  Hz, 1H), 2.29 (s, 3H), 2.20 (ddt,  $J = 13.5, 4.6, 1.9$  Hz, 1H), 1.97 (d,  $J = 1.5$  Hz, 3H), 1.73 – 1.61 (m, 1H);  $\delta_{\text{C}}$  (125 MHz,  $\text{CDCl}_3$ ) 199.0, 157.5, 143.7, 137.0, 135.3, 129.3, 128.92, 121.5, 108.2, 66.3, 52.21, 34.6, 30.9, 29.1, 21.0, 16.9;  $m/z$  (ESI+) found  $[\text{M}+\text{H}]^+$  269.1551.  $\text{C}_{18}\text{H}_{21}\text{O}_2^+$ : requires 269.1542.

**(4a*S*,5*S*)-1-methyl-5-(4-chlorobenzyl)-3,4,4a,5-tetrahydro-6*H*-isochromen-6-one, 24c**

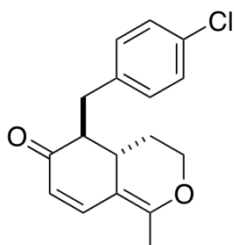

Following general procedure S, reaction of silyl enol ether **23c** (57.6 mg, 0.2 mmol) provided the title compound (32.0 mg, 55%) as a colorless viscous oil.  $\nu_{\max}$  (film)/ $\text{cm}^{-1}$  2927, 1661, 1608, 1491, 1279;  $\delta_{\text{H}}$  (400 MHz,  $\text{CDCl}_3$ ) 7.30 – 7.23 (m, 1H), 7.22 – 7.13 (m, 4H), 5.78 (d,  $J = 9.8$  Hz, 1H), 4.28 (ddd,  $J = 11.0, 3.9, 2.3$  Hz, 1H), 3.90 – 3.69 (m, 1H), 3.28 – 3.17 (m, 1H), 3.10 – 3.00 (m, 1H), 2.50 (dt,  $J = 12.2, 6.6$  Hz, 1H), 2.43 – 2.32 (m, 1H), 2.16 (ddt,  $J = 13.4, 4.6, 1.9$  Hz, 1H), 1.98 (d,  $J = 1.5$  Hz, 3H), 1.69 (tdd,  $J = 12.9, 11.2, 3.9$  Hz, 1H);  $\delta_{\text{C}}$  (100 MHz,  $\text{CDCl}_3$ ) 198.8, 158.0, 144.0, 138.8, 131.8, 130.9, 128.5, 121.5, 108.1, 66.3, 52.3, 34.7, 30.9, 29.2, 17.0; HRMS calcd. for  $\text{C}_{17}\text{H}_{18}\text{ClO}_2^+$ : 289.0995 Found: 289.1005.  $m/z$  (ESI+) found  $[\text{M}+\text{H}]^+$  289.1005.  $\text{C}_{17}\text{H}_{18}\text{ClO}_2^+$ : requires 289.0995.

**(4a*S*,5*S*)-1-methyl-5-(4-methoxybenzyl)-3,4,4a,5-tetrahydro-6*H*-isochromen-6-one, 24d**

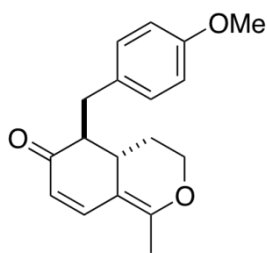

Following general procedure S, reaction of silyl enol ether **23d** (43.0 mg, 0.15 mmol) provided the title compound (23.5 mg, 55%) as a colorless viscous oil.  $\nu_{\text{max}}$  (film)/ $\text{cm}^{-1}$  2926, 1659, 1610, 1510, 1247;  $\delta_{\text{H}}$  (400 MHz,  $\text{CDCl}_3$ ) 7.28 – 7.21 (m, 1H), 7.13 (d,  $J = 8.7$  Hz, 2H), 6.82 – 6.75 (m, 2H), 5.78 (d,  $J = 9.8$  Hz, 1H), 4.27 (ddd,  $J = 10.9, 3.9, 2.3$  Hz, 1H), 3.88 – 3.70 (m, 4H), 3.24 (dd,  $J = 14.6, 3.7$  Hz, 1H), 3.00 (dd,  $J = 14.6, 5.4$  Hz, 1H), 2.60 – 2.47 (m, 1H), 2.36 (ddd,  $J = 13.6, 5.4, 3.7$  Hz, 1H), 2.20 (ddd,  $J = 11.5, 5.3, 2.6$  Hz, 1H), 2.03 – 1.93 (m, 3H), 1.68 (tdd,  $J = 13.0, 11.3, 3.9$  Hz, 1H);  $\delta_{\text{C}}$  (100 MHz,  $\text{CDCl}_3$ ) 199.2, 157.9, 157.7, 143.9, 132.1, 130.5, 121.7, 113.7, 108.3, 66.4, 55.3, 52.4, 34.5, 30.5, 29.2, 17.0;  $m/z$  (ESI+) found  $[\text{M}+\text{H}]^+$  285.1475.  $\text{C}_{18}\text{H}_{21}\text{O}_3^+$ : requires 285.1491.

### III. Supplementary Methods: Experimental procedures for library synthesis, tabulated results and characterization data for representative library compounds.

#### A. *Stemona* alkaloid-inspired libraries.

##### General procedures for library preparation and tabulated results.

##### Quinolines 25:

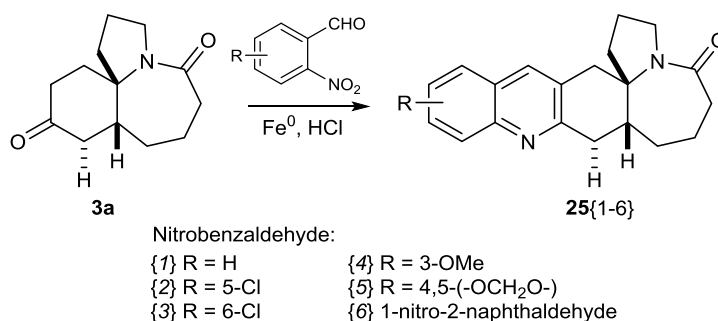

Fe<sup>0</sup> powder (90 mg, 1.6 mmol) was added to a solution of the appropriate nitrobenzaldehyde (0.41 mmol) in ethanol (2 mL) in a microwave vial, followed by 0.1 M HCl (210  $\mu$ L). The vial was sealed, then heated in an oil bath at 85 °C until complete by TLC (~2 h). The mixture was cooled to rt, then a solution of ketone scaffold **3a** (70 mg, 0.32 mmol) in EtOH (1 mL) added, followed by powdered KOH (22 mg, 0.38 mmol). The mixture was heated at 85 °C until complete by TLC (~3 h), then cooled to rt, passed through a celite plug and eluted with dichloromethane, and concentrated under reduced pressure. The residues were subjected to mass-directed preparative HPLC purification to afford pure quinolines **25**.

| Compound       | Calculated mass | Found mass | Recovered weight (mg) | Yield (%) | Purity (%) |
|----------------|-----------------|------------|-----------------------|-----------|------------|
| <b>25</b> {1}c | 307.1805        | 307.1816   | 21.3                  | 21.7      | 94.6       |
| <b>25</b> {2}  | 341.1415        | 341.1433   | 21                    | 26.8      | 98.9       |
| <b>25</b> {3}  | 341.1415        | 341.1430   | 14.8                  | 13.6      | 100        |
| <b>25</b> {4}  | 337.1911        | 337.1928   | 28.9                  | 26.9      | 100        |
| <b>25</b> {5}  | 351.1703        | 351.1725   | 15.2                  | 13.6      | 90         |
| <b>25</b> {6}  | 357.1962        | 357.1997   | 30.2                  | 26.5      | 100        |

## Amines 26 (from scaffold 3a)

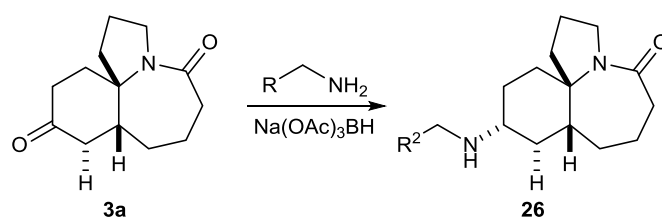

Amine:

- |                                 |                                |
|---------------------------------|--------------------------------|
| {1} R = phenyl                  | {14} R = 4-methoxyphenyl       |
| {2} R = 2-trifluoromethylphenyl | {15} R = 4-fluorophenyl        |
| {3} R = 2-methylphenyl          | {16} R = 4-methylphenyl        |
| {4} R = 2-methoxyphenyl         | {17} R = 3,4-dichlorophenyl    |
| {5} R = 2-fluorophenyl          | {18} R = 3,4-dimethoxyphenyl   |
| {6} R = 2-chlorophenyl          | {19} R = 2,4-difluorophenyl    |
| {7} R = 3-iodophenyl            | {20} R = 4-chloro-3-trifluoro- |
| {8} R = 3-methylphenyl          | methylphenyl                   |
| {9} R = 3-chlorophenyl          | {21} R = furfuryl              |
| {10} R = 3-fluorophenyl         | {22} R = 5-methylfurfuryl      |
| {11} R = 3-methoxyphenyl        | {23} R = thiophen-2-ylmethyl   |
| {12} R = 4-bromophenyl          | {24} R = pyridin-3-ylmethyl    |
| {13} R = 4-chlorophenyl         | {25} R = pyridin-4-ylethyl     |

Each reaction tube of a 24-position Bohdan Miniblock XT was flushed with argon, then a solution of the ketone scaffold **3a** (80 mg, 0.36 mmol) in anhydrous THF (2 mL) was added. The appropriate amine (0.54 mmol) was added, followed by acetic acid (21  $\mu$ L, 0.36 mmol). The reactions were shaken at 500 rpm at rt for 1 h, then sodium triacetoxyborohydride (150 mg, 0.72 mmol) added. The reactions were shaken for a further 13 h, then quenched by addition of 2M NaOH (0.5 mL) and shaken for an additional 10 min. Dichloromethane (2 mL) was added to each tube and the reactions passed through Isolute hydrophobic phase separator tubes, which allowed the halogenated solvent layer to pass through. The aqueous layers were extracted with dichloromethane (2 x 2 mL). The combined organics were evaporated in a Genevac EZ-2 Plus parallel evaporator and subjected to mass-directed preparative HPLC purification to afford pure amines **26**.

| Compound       | Calculated mass | Found mass | Recovered weight (mg) | Yield (%) | Purity (%) |
|----------------|-----------------|------------|-----------------------|-----------|------------|
| <b>26</b> {1}  | 313.2275        | 313.2288   | 21.8                  | 19.4      | 95.0       |
| <b>26</b> {2}  | 381.2148        | 381.2162   | 27.3                  | 19.9      | 98.2       |
| <b>26</b> {3}  | 327.2431        | 327.2442   | 30.5                  | 26.0      | 100.0      |
| <b>26</b> {4}  | 343.2380        | 343.2400   | 36.3                  | 29.5      | 100.0      |
| <b>26</b> {5}  | 331.2180        | 331.2196   | 36.8                  | 31.0      | 100.0      |
| <b>26</b> {6}  | 347.1885        | 347.1923   | 14.4                  | 11.6      | 100.0      |
| <b>26</b> {7}  | 439.1241        | 439.1272   | 38.8                  | 24.6      | 100.0      |
| <b>26</b> {8}  | 327.2431        | 327.2431   | 33.5                  | 28.5      | 100.0      |
| <b>26</b> {9}  | 347.1885        | 347.1910   | 19.8                  | 15.9      | 97.2       |
| <b>26</b> {10} | 331.2180        | 331.2192   | 33.3                  | 28.0      | 90.8       |
| <b>26</b> {11} | 343.2380        | 343.2400   | 33.7                  | 27.4      | 100.0      |
| <b>26</b> {12} | 391.1380        | 391.1413   | 31.6                  | 22.5      | 100.0      |
| <b>26</b> {13} | 347.1885        | 347.1912   | 31.0                  | 24.9      | 100.0      |
| <b>26</b> {14} | 343.2380        | 343.2402   | 18.5                  | 15.0      | 100.0      |
| <b>26</b> {15} | 331.2180        | 331.2206   | 38.3                  | 32.2      | 100.0      |
| <b>26</b> {16} | 327.2431        | 327.2442   | 29.1                  | 24.8      | 100.0      |
| <b>26</b> {17} | 381.1495        | 381.1513   | 25.1                  | 18.3      | 96.9       |
| <b>26</b> {18} | 373.2486        | 373.2499   | 42.4                  | 31.6      | 100.0      |
| <b>26</b> {19} | 349.2086        | 349.2113   | 39.0                  | 31.1      | 100.0      |
| <b>26</b> {20} | 415.1759        | 415.1785   | 39.0                  | 26.2      | 100.0      |

|        |          |          |      |      |       |
|--------|----------|----------|------|------|-------|
| 26{21} | 303.2067 | 303.2074 | 26.9 | 24.7 | 100.0 |
| 26{22} | 317.2224 | 317.2253 | 35.3 | 31.0 | 100.0 |
| 26{23} | 319.1839 | 319.1860 | 22.8 | 19.9 | 100.0 |
| 26{24} | 314.2227 | 314.2231 | 31.2 | 27.7 | 100.0 |
| 26{25} | 328.2384 | 328.2416 | 26.9 | 22.8 | 100.0 |

### Carbamates 27:

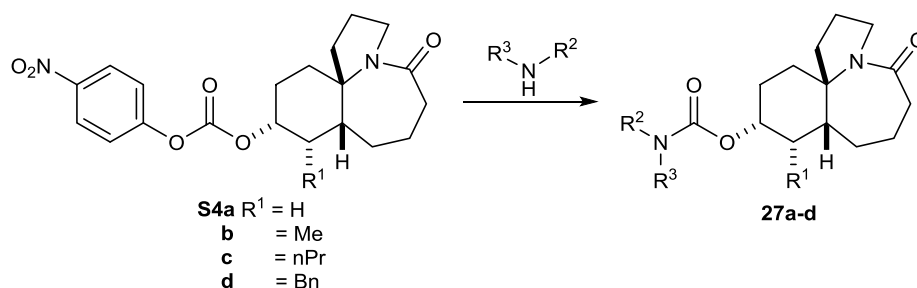

Amine:

- |                                                                  |                                                                           |
|------------------------------------------------------------------|---------------------------------------------------------------------------|
| {1} R <sup>2</sup> = benzyl, R <sup>3</sup> = H                  | {13} R <sup>2</sup> = thiophen-2-ylmethyl, R <sup>3</sup> = H             |
| {2} R <sup>2</sup> = 2-chlorobenzyl, R <sup>3</sup> = H          | {14} R <sup>2</sup> = pyridin-3-ylmethyl, R <sup>3</sup> = H              |
| {3} R <sup>2</sup> = 3-trifluoromethylbenzyl, R <sup>3</sup> = H | {15} R <sup>2</sup> = phenethyl, R <sup>3</sup> = H                       |
| {4} R <sup>2</sup> = 3-chlorobenzyl, R <sup>3</sup> = H          | {16} R <sup>2</sup> = 2-(1 <i>H</i> -indol-3-yl)ethyl, R <sup>3</sup> = H |
| {5} R <sup>2</sup> = 4-methylbenzyl, R <sup>3</sup> = H          | {17} R <sup>2</sup> = n-butyl, R <sup>3</sup> = H                         |
| {6} R <sup>2</sup> = 4-chlorobenzyl, R <sup>3</sup> = H          | {18} R <sup>2</sup> = 3-pentyl, R <sup>3</sup> = H                        |
| {7} R <sup>2</sup> = 4-methoxybenzyl, R <sup>3</sup> = H         | {19} R <sup>2</sup> = R <sup>3</sup> = ethyl                              |
| {8} R <sup>2</sup> = 4-trifluoromethylbenzyl, R <sup>3</sup> = H | {20} R <sup>2</sup> = R <sup>3</sup> = morpholinyl                        |
| {9} R <sup>2</sup> = 3,4-dichlorobenzyl, R <sup>3</sup> = H      | {21} R <sup>2</sup> = R <sup>3</sup> = 4-phenylpiperazinyl                |
| {10} R <sup>2</sup> = 3,4-dimethoxybenzyl, R <sup>3</sup> = H    | {22} R <sup>2</sup> = R <sup>3</sup> = pyrrolidinyl                       |
| {11} R <sup>2</sup> = furfuryl, R <sup>3</sup> = H               | {23} R <sup>2</sup> = cyclohexyl, R <sup>3</sup> = H                      |
| {12} R <sup>2</sup> = 5-methylfurfuryl, R <sup>3</sup> = H       | {24} R <sup>2</sup> = cyclobutyl, R <sup>3</sup> = H                      |

Each reaction tube of a 24-position Bohdan Miniblock XT was flushed with argon, then a solution of the carbonate scaffold **S4a-d** (80 mg) in anhydrous dichloromethane (1.5 mL) was added, followed by the appropriate amine (1.5 equiv). The reactions were shaken at 500 rpm at rt for 48 h, then water (2 mL) added. The reactions were passed through Isolute<sup>®</sup> hydrophobic phase separator tubes, which allowed the halogenated solvent layer to pass through. The aqueous layers were extracted with dichloromethane (2 x 2 mL). The combined organics were evaporated in a Genevac EZ-2 Plus parallel evaporator and subjected to mass-directed preparative HPLC purification to afford pure carbamates **27**.

| Compound        | Calculated Mass | Found mass | Recovered weight (mg) | Yield (%) | Purity (%) |
|-----------------|-----------------|------------|-----------------------|-----------|------------|
| <b>27a</b> {1}  | 357.2173        | 357.2189   | 35.9                  | 48.0      | 100.0      |
| <b>27a</b> {2}  | 391.1783        | 391.1788   | 52.0                  | 63.5      | 100.0      |
| <b>27a</b> {3}  | 425.2047        | 425.2080   | 54.0                  | 60.6      | 98.1       |
| <b>27a</b> {4}  | 391.1783        | 391.1790   | 55.0                  | 67.1      | 98.7       |
| <b>27a</b> {5}  | 371.2329        | 371.2357   | 48.1                  | 61.9      | 100.0      |
| <b>27a</b> {6}  | 391.1783        | 391.1814   | 49.2                  | 60.0      | 100.0      |
| <b>27a</b> {7}  | 387.2279        | 387.2265   | 40.1                  | 49.4      | 100.0      |
| <b>27a</b> {8}  | 425.2047        | 425.2043   | 49.6                  | 55.7      | 100.0      |
| <b>27a</b> {9}  | 425.1393        | 425.1452   | 48.8                  | 54.8      | 100.0      |
| <b>27a</b> {10} | 417.2384        | 417.2370   | 45.0                  | 51.5      | 100.0      |
| <b>27a</b> {11} | 347.1966        | 347.1975   | 45.0                  | 61.9      | 100.0      |
| <b>27a</b> {12} | 361.2122        | 361.2134   | 28.9                  | 38.2      | 98.4       |
| <b>27a</b> {13} | 363.1737        | 363.1761   | 33.7                  | 44.3      | 100.0      |



|                 |          |          |      |      |       |
|-----------------|----------|----------|------|------|-------|
| <b>27a</b> {14} | 358.2125 | 358.2135 | 35.9 | 47.9 | 100.0 |
| <b>27a</b> {15} | 371.2329 | 371.2330 | 56.8 | 73.1 | 100.0 |
| <b>27a</b> {16} | 410.2438 | 410.2466 | 51.0 | 59.3 | 98.8  |
| <b>27a</b> {17} | 323.2329 | 323.2342 | 34.2 | 50.5 | 97.5  |
| <b>27a</b> {18} | 337.2486 | 337.2507 | 38.3 | 54.2 | 100.0 |
| <b>27a</b> {19} | 323.2329 | 323.2369 | 33.3 | 49.2 | 90.2  |
| <b>27a</b> {20} | 337.2122 | 337.2154 | 35.7 | 50.6 | 92.9  |
| <b>27a</b> {21} | 412.2595 | 412.2629 | 35.6 | 41.2 | 100.0 |
| <b>27a</b> {22} | 321.2173 | 321.2209 | 36.1 | 53.7 | 95.9  |
| <b>27a</b> {23} | 349.2486 | 349.2506 | 30.9 | 42.3 | 99.0  |
| <b>27a</b> {24} | 321.2173 | 321.2176 | 31.0 | 46.1 | 100.0 |
| <b>27b</b> {1}  | 371.2329 | 371.2336 | 47.5 | 61.1 | 100.0 |
| <b>27b</b> {2}  | 405.1940 | 405.1938 | 49.5 | 58.3 | 100.0 |
| <b>27b</b> {3}  | 439.2203 | 439.2181 | 45.0 | 48.9 | 100.0 |
| <b>27b</b> {4}  | 405.1940 | 405.1926 | 42.3 | 49.8 | 100.0 |
| <b>27b</b> {5}  | 385.2486 | 385.2510 | 36.8 | 45.6 | 100.0 |
| <b>27b</b> {6}  | 405.1940 | 405.1922 | 29.6 | 34.9 | 100.0 |
| <b>27b</b> {7}  | 401.2435 | 401.2449 | 26.3 | 31.3 | 98.9  |
| <b>27b</b> {8}  | 439.2203 | 439.2206 | 23.6 | 25.6 | 100.0 |
| <b>27b</b> {9}  | 439.1550 | 439.1497 | 38.5 | 41.8 | 100.0 |
| <b>27b</b> {10} | 431.2541 | 431.2542 | 24.9 | 27.6 | 100.0 |
| <b>27b</b> {11} | 361.2122 | 361.2135 | 23.0 | 30.4 | 100.0 |
| <b>27b</b> {12} | 375.2279 | 375.2288 | 35.1 | 44.7 | 100.0 |
| <b>27b</b> {13} | 377.1894 | 377.1879 | 19.1 | 24.2 | 98.9  |
| <b>27b</b> {14} | 372.2282 | 372.2301 | 18.2 | 23.3 | 97.9  |
| <b>27b</b> {15} | 385.2486 | 385.2502 | 32.7 | 40.5 | 100.0 |
| <b>27b</b> {16} | 424.2595 | 424.2609 | 33.4 | 37.6 | 100.0 |
| <b>27b</b> {17} | 337.2486 | 337.2522 | 21.9 | 31.0 | 100.0 |
| <b>27b</b> {18} | 351.2642 | 351.2660 | 26.3 | 35.8 | 95.1  |
| <b>27b</b> {19} | 337.2486 | 337.2507 | 30.4 | 43.1 | 92.6  |
| <b>27b</b> {20} | 351.2279 | 351.2295 | 27.7 | 37.7 | 100.0 |
| <b>27b</b> {21} | 426.2751 | 426.2762 | 31.0 | 34.7 | 98.9  |
| <b>27b</b> {22} | 335.2329 | 335.2358 | 11.7 | 16.7 | 92.3  |
| <b>27b</b> {23} | 363.2642 | 363.2659 | 29.0 | 38.1 | 93.9  |
| <b>27b</b> {24} | 335.2329 | 335.2349 | 26.7 | 38.0 | 93.3  |
| <b>27c</b> {1}  | 399.2642 | 399.2655 | 32.4 | 42.8 | 100.0 |
| <b>27c</b> {2}  | 433.2253 | 433.2271 | 36.0 | 43.8 | 100.0 |
| <b>27c</b> {3}  | 467.2516 | 467.2537 | 34.8 | 39.3 | 100.0 |
| <b>27c</b> {4}  | 433.2253 | 433.2284 | 65.6 | 79.9 | 100.0 |
| <b>27c</b> {5}  | 413.2799 | 413.2822 | 50.9 | 65.0 | 100.0 |
| <b>27c</b> {6}  | 433.2253 | 433.2261 | 29.3 | 35.7 | 100.0 |
| <b>27c</b> {7}  | 429.2748 | 429.2772 | 32.7 | 40.2 | 100.0 |
| <b>27c</b> {8}  | 467.2516 | 467.2519 | 67.6 | 76.3 | 99.0  |
| <b>27c</b> {9}  | 467.1863 | 467.1869 | 35.7 | 40.3 | 100.0 |
| <b>27c</b> {10} | 459.2854 | 459.2870 | 67.8 | 77.9 | 97.0  |
| <b>27c</b> {11} | 389.2435 | 389.2434 | 25.7 | 34.8 | 100.0 |
| <b>27c</b> {12} | 403.2592 | 403.2605 | 57.0 | 74.6 | 96.9  |
| <b>27c</b> {13} | 405.2207 | 405.2212 | 54.9 | 71.5 | 100.0 |
| <b>27c</b> {14} | 400.2595 | 400.2621 | 27.3 | 36.0 | 100.0 |
| <b>27c</b> {15} | 413.2799 | 413.2838 | 31.4 | 40.1 | 100.0 |
| <b>27c</b> {16} | 452.2908 | 452.2921 | 56.0 | 65.3 | 100.0 |
| <b>27c</b> {17} | 365.2799 | 365.2807 | 26.4 | 38.1 | 100.0 |
| <b>27c</b> {18} | 379.2955 | 379.2984 | 29.7 | 41.3 | 100.0 |
| <b>27c</b> {19} | 365.2799 | 365.2804 | 53.3 | 77.0 | 89.8  |
| <b>27c</b> {20} | 379.2592 | 379.2579 | 30.9 | 43.0 | 100.0 |
| <b>27c</b> {21} | 454.3064 | 454.3093 | 40.7 | 47.3 | 100.0 |
| <b>27c</b> {22} | 363.2642 | 363.2656 | 22.5 | 32.7 | 100.0 |
| <b>27c</b> {23} | 391.2955 | 391.2966 | 29.9 | 40.3 | 100.0 |
| <b>27c</b> {24} | 363.2642 | 363.2649 | 48.7 | 70.8 | 91.6  |
| <b>27d</b> {1}  | 447.2642 | 447.2655 | 44.0 | 58.0 | 100.0 |
| <b>27d</b> {2}  | 481.2253 | 481.2273 | 54.9 | 67.2 | 100.0 |

|                 |          |          |      |      |       |
|-----------------|----------|----------|------|------|-------|
| <b>27d</b> {3}  | 515.2516 | 515.2521 | 53.7 | 61.4 | 99.0  |
| <b>27d</b> {4}  | 481.2253 | 481.2276 | 57.6 | 70.6 | 98.7  |
| <b>27d</b> {5}  | 461.2799 | 461.2777 | 52.5 | 67.1 | 100.0 |
| <b>27d</b> {6}  | 481.2253 | 481.2258 | 43.9 | 53.8 | 100.0 |
| <b>27d</b> {7}  | 477.2748 | 477.2761 | 43.8 | 54.1 | 100.0 |
| <b>27d</b> {8}  | 515.2516 | 515.2517 | 62.0 | 70.9 | 96.9  |
| <b>27d</b> {9}  | 515.1863 | 515.1882 | 61.6 | 70.5 | 98.6  |
| <b>27d</b> {10} | 507.2854 | 507.2867 | 42.5 | 49.4 | 100.0 |
| <b>27d</b> {11} | 437.2435 | 437.2456 | 42.5 | 57.3 | 100.0 |
| <b>27d</b> {12} | 451.2592 | 451.2602 | 49.6 | 64.8 | 100.0 |
| <b>27d</b> {13} | 453.2207 | 453.2205 | 45.3 | 58.9 | 100.0 |
| <b>27d</b> {14} | 448.2595 | 448.2596 | 43.0 | 56.6 | 100.0 |
| <b>27d</b> {15} | 461.2799 | 461.2807 | 51.4 | 65.7 | 100.0 |
| <b>27d</b> {16} | 500.2908 | 500.2932 | 58.1 | 68.5 | 100.0 |
| <b>27d</b> {17} | 413.2799 | 413.2802 | 38.6 | 55.1 | 100.0 |
| <b>27d</b> {18} | 427.2955 | 427.2931 | 50.8 | 70.1 | 100.0 |
| <b>27d</b> {19} | 413.2799 | 413.2779 | 12.7 | 18.1 | 96.7  |
| <b>27d</b> {20} | 427.2592 | 427.2596 | 7.9  | 10.9 | 86.1  |
| <b>27d</b> {21} | 502.3064 | 502.3063 | 52.8 | 62.0 | 100.0 |
| <b>27d</b> {22} | 411.2642 | 411.2644 | 36.1 | 51.8 | 98.6  |
| <b>27d</b> {23} | 439.2955 | 439.2951 | 49.4 | 66.3 | 100.0 |
| <b>27d</b> {24} | 411.2642 | 411.2674 | 57.3 | 82.2 | 97.3  |

### General procedure for the preparation of amides **28**

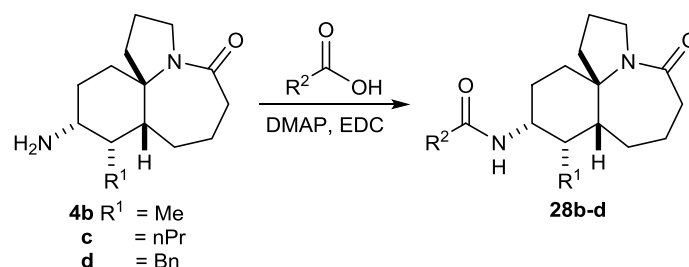

Carboxylic acid:

- |                                                         |                                                    |
|---------------------------------------------------------|----------------------------------------------------|
| {1} R <sup>2</sup> = phenyl                             | {13} R <sup>2</sup> = n-butyl                      |
| {2} R <sup>2</sup> = 4-chlorophenyl                     | {14} R <sup>2</sup> = n-hexyl                      |
| {3} R <sup>2</sup> = 4-methoxyphenyl                    | {15} R <sup>2</sup> = buten-4-yl                   |
| {4} R <sup>2</sup> = 4-methylphenyl                     | {16} R <sup>2</sup> = cyclobutyl                   |
| {5} R <sup>2</sup> = 4-trifluoromethylphenyl            | {17} R <sup>2</sup> = cyclohexyl                   |
| {6} R <sup>2</sup> = 4-dimethylaminophenyl              | {18} R <sup>2</sup> = (tetrahydrofuran-3-yl)methyl |
| {7} R <sup>2</sup> = 3-chlorophenyl                     | {19} R <sup>2</sup> = cinnamoyl                    |
| {8} R <sup>2</sup> = 3-dimethylaminophenyl              | {20} R <sup>2</sup> = propyn-1-yl                  |
| {9} R <sup>2</sup> = 3-methylphenyl                     | {21} R <sup>2</sup> = 3-phenylpropyn-1-yl          |
| {10} R <sup>2</sup> = 3-trifluoromethylphenyl           | {22} R <sup>2</sup> = (thiophen-3-yl)methyl        |
| {11} R <sup>2</sup> = 3,4-dichlorophenyl                | {23} R <sup>2</sup> = nicotinyl                    |
| {12} R <sup>2</sup> = 4-chloro-3-trifluoro-methylphenyl | {24} R <sup>2</sup> = diphenylmethyl               |

Each reaction tube of a 24-position Bohdan Miniblock XT was flushed with argon, then a solution of the amine scaffold **4b-d** (60 mg) in anhydrous dichloromethane (1.5 mL) was added, followed by the appropriate acid (1.2 equiv), EDC (1.2 equiv) and DMAP (1.2 equiv). The reactions were shaken at 500 rpm at rt for 18 h, then water (2 mL) added. The reactions were passed through Isolute hydrophobic phase separator tubes, which allowed the halogenated solvent layer to pass through. The aqueous layers were extracted with dichloromethane (2 x 2 mL). The combined organics were

evaporated in a Genevac EZ-2 Plus parallel evaporator and subjected to mass-directed preparative HPLC purification to afford pure amides **28**.

| Compound        | Calculated Mass | Found mass | Recovered weight (mg) | Yield (%) | Purity (%) |
|-----------------|-----------------|------------|-----------------------|-----------|------------|
| <b>28b</b> {1}  | 341.2224        | 341.2244   | 60.3                  | 70.9      | 93.6       |
| <b>28b</b> {2}  | 375.1834        | 375.1847   | 13.7                  | 14.6      | 97.4       |
| <b>28b</b> {3}  | 371.2329        | 371.2342   | 122.3                 | 132.1     | 100.0      |
| <b>28b</b> {5}  | 409.2098        | 409.2084   | 52.8                  | 51.7      | 100.0      |
| <b>28b</b> {7}  | 375.1834        | 375.1864   | 5.6                   | 6.0       | 75.4       |
| <b>28b</b> {8}  | 384.2646        | 384.2683   | 50.6                  | 52.8      | 95.3       |
| <b>28b</b> {9}  | 355.2380        | 355.2399   | 46.7                  | 52.7      | 98.0       |
| <b>28b</b> {10} | 409.2098        | 409.2082   | 50.7                  | 49.7      | 98.9       |
| <b>28b</b> {11} | 409.1444        | N/A        | 0.0                   | 0.0       | N/A        |
| <b>28b</b> {12} | 443.1708        | 443.1706   | 59.1                  | 53.5      | 98.6       |
| <b>28b</b> {13} | 321.2537        | 321.2545   | 47.7                  | 59.6      | 100.0      |
| <b>28b</b> {14} | 363.3006        | 363.3026   | 41.6                  | 45.9      | 100.0      |
| <b>28b</b> {15} | 319.2380        | 319.2414   | 36.9                  | 46.4      | 100.0      |
| <b>28b</b> {16} | 319.2380        | 319.2412   | 22.3                  | 28.0      | 100.0      |
| <b>28b</b> {17} | 347.2693        | 347.2701   | 33.1                  | 38.2      | 100.0      |
| <b>28b</b> {18} | 335.2329        | 335.2358   | 25.2                  | 30.2      | 97.7       |
| <b>28b</b> {19} | 367.2380        | 367.2369   | 41.4                  | 45.2      | 100.0      |
| <b>28b</b> {20} | 303.2067        | 303.2083   | 17.1                  | 22.6      | 100.0      |
| <b>28b</b> {21} | 365.2224        | 365.2231   | 25.4                  | 27.9      | 100.0      |
| <b>28b</b> {22} | 361.1944        | 361.1955   | 46.4                  | 51.5      | 100.0      |
| <b>28b</b> {23} | 342.2176        | 342.2206   | 67.2                  | 78.8      | 80.4       |
| <b>28b</b> {24} | 431.2693        | 431.2725   | 25.3                  | 23.5      | 100.0      |
| <b>28c</b> {1}  | 369.2537        | 369.2551   | 4.6                   | 5.4       | 89.9       |
| <b>28c</b> {2}  | 403.2147        | 403.2168   | 29.3                  | 31.7      | 100.0      |
| <b>28c</b> {3}  | 399.2642        | 399.2638   | 23.0                  | 25.1      | 100.0      |
| <b>28c</b> {4}  | 383.2693        | 383.2684   | 18.3                  | 20.8      | 100.0      |
| <b>28c</b> {5}  | 437.2411        | 437.2430   | 13.5                  | 13.5      | 96.7       |
| <b>28c</b> {6}  | 412.2959        | 412.2959   | 9.9                   | 10.5      | 100.0      |
| <b>28c</b> {7}  | 403.2147        | 403.2162   | 31.8                  | 34.4      | 100.0      |
| <b>28c</b> {8}  | 412.2959        | 412.2958   | 28.1                  | 29.7      | 98.5       |
| <b>28c</b> {9}  | 383.2693        | 383.2683   | 15.1                  | 17.2      | 100.0      |
| <b>28c</b> {10} | 437.2411        | 437.2407   | 32.2                  | 32.1      | 100.0      |
| <b>28c</b> {11} | 437.1757        | 437.1804   | 23.5                  | 23.4      | 100.0      |
| <b>28c</b> {12} | 471.2021        | 471.2030   | 37.5                  | 34.7      | 94.5       |
| <b>28c</b> {13} | 349.2850        | 349.2879   | 35.9                  | 44.8      | 98.0       |
| <b>28c</b> {14} | 391.3319        | 391.3318   | 40.1                  | 44.7      | 96.8       |
| <b>28c</b> {15} | 347.2693        | 347.2717   | 31.1                  | 39.1      | 94.3       |
| <b>28c</b> {16} | 347.2693        | 347.2722   | 10.9                  | 13.7      | 100.0      |
| <b>28c</b> {17} | 375.3006        | 375.3038   | 23.5                  | 27.3      | 100.0      |
| <b>28c</b> {18} | 363.2642        | 363.2666   | 30.8                  | 37.0      | 100.0      |
| <b>28c</b> {19} | 395.2693        | 395.2696   | 37.7                  | 41.6      | 100.0      |
| <b>28c</b> {20} | 331.2380        | 331.2421   | 9.6                   | 12.6      | 96.2       |
| <b>28c</b> {21} | 393.2537        | 393.2510   | 7.8                   | 8.6       | 95.9       |
| <b>28c</b> {22} | 389.2257        | 389.2268   | 13.7                  | 15.3      | 71.2       |
| <b>28c</b> {23} | 370.2489        | 370.2507   | 20.9                  | 24.6      | 100.0      |
| <b>28c</b> {24} | 459.3006        | 459.3026   | 55.6                  | 52.7      | 100.0      |
| <b>28d</b> {1}  | 417.2537        | 417.2537   | 36.2                  | 41.4      | 98.8       |
| <b>28d</b> {2}  | 451.2147        | 451.2148   | 32.5                  | 34.4      | 98.3       |
| <b>28d</b> {3}  | 447.2642        | 447.2645   | 39.1                  | 41.7      | 97.6       |
| <b>28d</b> {4}  | 431.2693        | 431.2708   | 48.9                  | 54.1      | 100.0      |
| <b>28d</b> {5}  | 485.2411        | 485.2403   | 44.7                  | 44.0      | 95.4       |
| <b>28d</b> {6}  | 460.2959        | 460.2948   | 73.5                  | 76.2      | 96.6       |
| <b>28d</b> {7}  | 451.2147        | 451.2142   | 45.8                  | 48.4      | 99.0       |
| <b>28d</b> {8}  | 460.2959        | 460.2949   | 63.5                  | 65.8      | 95.3       |

|                 |          |          |      |      |       |
|-----------------|----------|----------|------|------|-------|
| <b>28d</b> {9}  | 431.2693 | 431.2669 | 44.9 | 49.7 | 97.1  |
| <b>28d</b> {10} | 485.2411 | 485.2445 | 57.3 | 56.3 | 98.8  |
| <b>28d</b> {11} | 485.1757 | 485.1770 | 34.3 | 33.7 | 98.3  |
| <b>28d</b> {12} | 519.2021 | 519.2014 | 55.0 | 50.5 | 96.6  |
| <b>28d</b> {13} | 397.2850 | 397.2853 | 54.6 | 65.6 | 98.3  |
| <b>28d</b> {14} | 439.3319 | 439.3316 | 55.9 | 60.7 | 97.7  |
| <b>28d</b> {15} | 395.2693 | 395.2673 | 54.0 | 65.2 | 93.4  |
| <b>28d</b> {16} | 395.2693 | 395.2696 | 34.0 | 41.1 | 98.0  |
| <b>28d</b> {17} | 423.3006 | 423.3005 | 21.3 | 24.0 | 91.6  |
| <b>28d</b> {18} | 411.2642 | 411.2638 | 45.9 | 53.3 | 100.0 |
| <b>28d</b> {19} | 443.2693 | 443.2688 | 77.0 | 82.9 | 93.2  |
| <b>28d</b> {20} | 379.2380 | 379.2379 | 26.4 | 33.2 | 100.0 |
| <b>28d</b> {21} | 441.2537 | 441.2520 | 33.5 | 36.2 | 100.0 |
| <b>28d</b> {22} | 437.2257 | 437.2256 | 42.8 | 46.7 | 100.0 |
| <b>28d</b> {23} | 418.2489 | 418.2500 | 40.4 | 46.1 | 100.0 |
| <b>28d</b> {24} | 507.3006 | 507.2996 | 74.6 | 70.2 | 100.0 |

### General procedure for the preparation of sulfonamides **29**

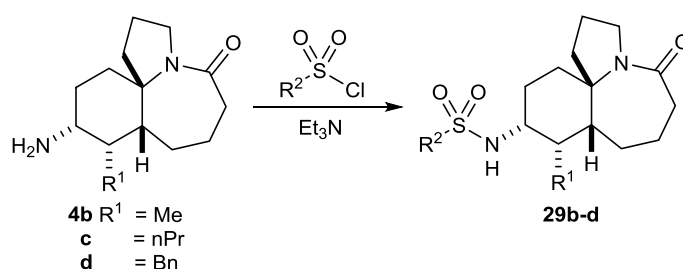

Sulfonyl chloride:

|                                               |                                                     |
|-----------------------------------------------|-----------------------------------------------------|
| {1} R <sup>2</sup> = phenyl                   | {13} R <sup>2</sup> = 4-acetamidophenyl             |
| {2} R <sup>2</sup> = 2-nitrophenyl            | {14} R <sup>2</sup> = 4-n-butylphenyl               |
| {3} R <sup>2</sup> = 2-methylphenyl           | {15} R <sup>2</sup> = 4-biphenyl                    |
| {4} R <sup>2</sup> = 3-nitrophenyl            | {16} R <sup>2</sup> = 4-bromophenyl                 |
| {5} R <sup>2</sup> = 3-methylphenyl           | {17} R <sup>2</sup> = 2,4-dinitrophenyl             |
| {6} R <sup>2</sup> = 4-methylphenyl           | {18} R <sup>2</sup> = 3,5-dichlorophenyl            |
| {7} R <sup>2</sup> = 4-fluorophenyl           | {19} R <sup>2</sup> = mesityl                       |
| {8} R <sup>2</sup> = 4-chlorophenyl           | {20} R <sup>2</sup> = naphth-2-yl                   |
| {9} R <sup>2</sup> = 4-cyanophenyl            | {21} R <sup>2</sup> = thiophen-2-yl                 |
| {10} R <sup>2</sup> = 4-methoxyphenyl         | {22} R <sup>2</sup> = <i>N</i> -methylimidazol-4-yl |
| {11} R <sup>2</sup> = 4-nitrophenyl           | {23} R <sup>2</sup> = benzyl                        |
| {12} R <sup>2</sup> = 4-trifluoromethylphenyl | {24} R <sup>2</sup> = cyclohexyl                    |

Each reaction tube of a 24-position Bohdan Miniblock XT was flushed with argon, then a solution of the amine scaffold **4b-d** (70 mg) in anhydrous dichloromethane (2 mL) was added, followed by the appropriate sulfonyl chloride (1.5 equiv) and Et<sub>3</sub>N (1.5 equiv). The reactions were shaken at 500 rpm at rt for 18 h, then water (2 mL) added. The reactions were passed through Isolute hydrophobic phase separator tubes, which allowed the halogenated solvent layer to pass through. The aqueous layers were extracted with dichloromethane (2 x 2 mL). The combined organics were evaporated in a Genevac EZ-2 Plus parallel evaporator and subjected to mass-directed preparative HPLC purification to afford pure sulfonamides **29**.

| Compound       | Calculated Mass | Found mass | Recovered weight (mg) | Yield (%) | Purity (%) |
|----------------|-----------------|------------|-----------------------|-----------|------------|
| <b>29b</b> {1} | 377.1894        | 377.1899   | 48.5                  | 43.0      | 100.0      |
| <b>29b</b> {2} | 422.1744        | 422.1725   | 69.6                  | 55.1      | 100.0      |
| <b>29b</b> {3} | 391.2050        | 391.2053   | 77.2                  | 65.9      | 100.0      |

|                |          |          |      |      |       |
|----------------|----------|----------|------|------|-------|
| <b>29b{4}</b>  | 422.1744 | 422.1753 | 38.2 | 30.2 | 100.0 |
| <b>29b{5}</b>  | 391.2050 | 391.2075 | 60.1 | 51.3 | 97.5  |
| <b>29b{6}</b>  | 391.2050 | 391.2055 | 0.8  | 0.7  | 81.3  |
| <b>29b{7}</b>  | 395.1799 | 395.1820 | 66.8 | 56.5 | 100.0 |
| <b>29b{8}</b>  | 411.1504 | 411.1505 | 59.5 | 48.4 | 100.0 |
| <b>29b{9}</b>  | 402.1846 | 402.1849 | 60.7 | 50.4 | 98.6  |
| <b>29b{10}</b> | 407.1999 | N/A      | 0.0  | 0.0  | N/A   |
| <b>29b{11}</b> | 422.1744 | 422.1731 | 70.3 | 55.6 | 96.5  |
| <b>29b{12}</b> | 445.1767 | 445.1782 | 67.9 | 51.0 | 98.5  |
| <b>29b{13}</b> | 434.2108 | 434.2116 | 3.9  | 3.0  | 96.3  |
| <b>29b{14}</b> | 433.2520 | 433.2509 | 66.4 | 51.2 | 100.0 |
| <b>29b{15}</b> | 453.2207 | 453.2216 | 58.5 | 43.1 | 100.0 |
| <b>29b{16}</b> | 455.0999 | 455.1032 | 81.9 | 60.1 | 98.6  |
| <b>29b{17}</b> | 467.1595 | 467.1598 | 23.6 | 16.9 | 100.0 |
| <b>29b{18}</b> | 445.1114 | 445.1129 | 67.2 | 50.4 | 100.0 |
| <b>29b{19}</b> | 419.2363 | 419.2376 | 36.7 | 29.3 | 100.0 |
| <b>29b{20}</b> | 427.2050 | 427.2044 | 79.5 | 62.2 | 100.0 |
| <b>29b{21}</b> | 383.1458 | 383.1481 | 60.6 | 52.9 | 95.7  |
| <b>29b{22}</b> | 381.1955 | 381.1958 | 15.0 | 13.2 | 96.7  |
| <b>29b{23}</b> | 391.2050 | 391.2068 | 47.2 | 40.3 | 100.0 |
| <b>29b{24}</b> | 383.2363 | 383.2385 | 1.0  | 0.9  | 22.1  |
| <b>29c{1}</b>  | 405.2207 | 405.2200 | 42.9 | 40.8 | 100.0 |
| <b>29c{2}</b>  | 450.2057 | 450.2058 | 29.2 | 25.0 | 100.0 |
| <b>29c{3}</b>  | 419.2363 | 419.2366 | 53.4 | 49.1 | 100.0 |
| <b>29c{4}</b>  | 450.2057 | 450.2047 | 45.8 | 39.2 | 100.0 |
| <b>29c{5}</b>  | 419.2363 | 419.2371 | 51.5 | 47.4 | 100.0 |
| <b>29c{6}</b>  | 419.2363 | 419.2378 | 24.5 | 22.5 | 96.8  |
| <b>29c{7}</b>  | 423.2112 | 423.2110 | 46.9 | 42.7 | 100.0 |
| <b>29c{8}</b>  | 439.1817 | 439.1808 | 44.0 | 38.6 | 100.0 |
| <b>29c{9}</b>  | 430.2159 | 430.2155 | 42.9 | 38.4 | 98.2  |
| <b>29c{10}</b> | 435.2312 | 435.2318 | 53.1 | 47.0 | 98.7  |
| <b>29c{11}</b> | 450.2057 | 450.2061 | 31.4 | 26.9 | 100.0 |
| <b>29c{12}</b> | 473.2080 | 473.2077 | 26.9 | 21.9 | 96.2  |
| <b>29c{13}</b> | 462.2421 | 462.2435 | 60.8 | 50.7 | 100.0 |
| <b>29c{14}</b> | 461.2833 | 461.2835 | 58.3 | 48.7 | 98.4  |
| <b>29c{15}</b> | 481.2520 | 481.2521 | 52.2 | 41.8 | 100.0 |
| <b>29c{16}</b> | 483.1312 | 483.1317 | 60.9 | 48.6 | 98.9  |
| <b>29c{17}</b> | 495.1908 | 495.1903 | 51.9 | 40.4 | 96.7  |
| <b>29c{18}</b> | 473.1427 | 473.1418 | 65.9 | 53.7 | 100.0 |
| <b>29c{19}</b> | 447.2676 | 447.2681 | 10.3 | 8.9  | 100.0 |
| <b>29c{20}</b> | 455.2363 | 455.2365 | 48.5 | 41.1 | 100.0 |
| <b>29c{21}</b> | 411.1771 | 411.1767 | 59.1 | 55.4 | 96.7  |
| <b>29c{22}</b> | 409.2268 | 409.2289 | 9.7  | 9.1  | 91.1  |
| <b>29c{23}</b> | 419.2363 | 419.2382 | 38.5 | 35.4 | 100.0 |
| <b>29c{24}</b> | 411.2676 | 411.2697 | 0.0  | 0.0  | 15.3  |
| <b>29d{1}</b>  | 453.2207 | 453.2194 | 52.4 | 55.2 | 100.0 |
| <b>29d{3}</b>  | 467.2363 | 467.2354 | 35.2 | 36.0 | 100.0 |
| <b>29d{4}</b>  | 498.2057 | 498.2050 | 64.6 | 61.9 | 100.0 |
| <b>29d{5}</b>  | 467.2363 | 467.2362 | 56.8 | 58.0 | 97.9  |
| <b>29d{6}</b>  | 467.2363 | 467.2352 | 64.1 | 65.5 | 100.0 |
| <b>29d{7}</b>  | 471.2112 | 471.2092 | 59.3 | 60.1 | 100.0 |
| <b>29d{8}</b>  | 487.1817 | 487.1806 | 78.1 | 76.5 | 100.0 |
| <b>29d{9}</b>  | 478.2159 | 478.2154 | 54.8 | 54.7 | 98.6  |
| <b>29d{10}</b> | 483.2312 | 483.2308 | 61.0 | 60.2 | 98.7  |
| <b>29d{11}</b> | 498.2057 | 498.2062 | 51.5 | 49.3 | 100.0 |
| <b>29d{12}</b> | 521.2080 | 521.2081 | 70.7 | 64.7 | 100.0 |
| <b>29d{13}</b> | 510.2421 | 510.2429 | 24.6 | 23.0 | 98.5  |
| <b>29d{14}</b> | 509.2833 | 509.2836 | 63.0 | 59.0 | 100.0 |
| <b>29d{15}</b> | 529.2520 | 509.2836 | 62.3 | 56.2 | 100.0 |
| <b>29d{16}</b> | 531.1312 | 531.1308 | 83.9 | 75.4 | 100.0 |
| <b>29d{17}</b> | 543.1908 | 543.1914 | 35.7 | 31.4 | 97.1  |

|                 |          |          |      |      |       |
|-----------------|----------|----------|------|------|-------|
| <b>29d</b> {18} | 521.1427 | 521.1418 | 78.0 | 71.4 | 100.0 |
| <b>29d</b> {19} | 495.2676 | 495.2667 | 38.9 | 37.5 | 100.0 |
| <b>29d</b> {20} | 503.2363 | 503.2385 | 14.0 | 13.3 | 96.1  |
| <b>29d</b> {21} | 459.1771 | 459.1761 | 45.9 | 47.7 | 97.7  |
| <b>29d</b> {22} | 457.2268 | 457.2260 | 56.5 | 59.0 | 100.0 |
| <b>29d</b> {23} | 467.2363 | 467.2374 | 48.1 | 49.1 | 99.0  |
| <b>29d</b> {24} | 459.2676 | 459.2682 | 0.6  | 0.6  | 8.3   |

### Ureas 30:

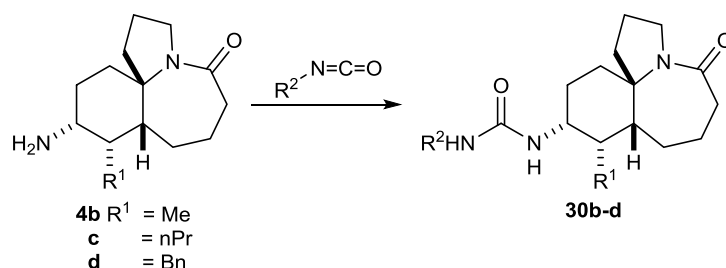

Sulfonyl chloride:

- |                                              |                                                                          |
|----------------------------------------------|--------------------------------------------------------------------------|
| {1} R <sup>2</sup> = phenyl                  | {12} R <sup>2</sup> = 4-trifluoromethylphenyl                            |
| {2} R <sup>2</sup> = 2-methylphenyl          | {13} R <sup>2</sup> = 4-cyanophenyl                                      |
| {3} R <sup>2</sup> = 2-chlorophenyl          | {14} R <sup>2</sup> = 4-fluorophenyl                                     |
| {4} R <sup>2</sup> = 2-methoxyphenyl         | {15} R <sup>2</sup> = 4-isopropylphenyl                                  |
| {5} R <sup>2</sup> = 2-trifluoromethylphenyl | {16} R <sup>2</sup> = 3,4-(methylene-dioxy)phenyl                        |
| {6} R <sup>2</sup> = 3-methoxyphenyl         | {17} R <sup>2</sup> = 3,5-dichlorophenyl                                 |
| {7} R <sup>2</sup> = 3-trifluoromethylphenyl | {18} R <sup>2</sup> = benzyl                                             |
| {8} R <sup>2</sup> = 3-cyanophenyl           | {19} R <sup>2</sup> = furfuryl                                           |
| {9} R <sup>2</sup> = 4-methylphenyl          | {20} R <sup>2</sup> = (CH <sub>2</sub> ) <sub>3</sub> CO <sub>2</sub> Et |
| {10} R <sup>2</sup> = 4-chlorophenyl         | {21} R <sup>2</sup> = ethyl                                              |
| {11} R <sup>2</sup> = 4-methoxyphenyl        | {22} R <sup>2</sup> = n-butyl                                            |

Each reaction tube of a 24-position Bohdan Miniblock XT was flushed with argon, then a solution of the amine scaffold **4b-d** (60 mg) in anhydrous toluene (2 mL) was added, followed by the appropriate isocyanate (1.5 equiv). The reactions were shaken at 500 rpm at rt for 18 h, then evaporated in a Genevac EZ-2 Plus parallel evaporator and subjected to mass-directed preparative HPLC purification to afford pure ureas **30**.

| Compound        | Cal. Mass | Found mass | Recovered weight (mg) | Yield (%) | Purity (%) |
|-----------------|-----------|------------|-----------------------|-----------|------------|
| <b>30b</b> {1}  | 356.2333  | 356.2344   | 89.9                  | 84.4      | 100.0      |
| <b>30b</b> {2}  | 370.2489  | 370.2501   | 59.9                  | 54.1      | 92.6       |
| <b>30b</b> {3}  | 390.1943  | 390.1954   | 8.6                   | 7.4       | 66.5       |
| <b>30b</b> {4}  | 386.2438  | 386.2447   | 31.4                  | 27.2      | 76.1       |
| <b>30b</b> {5}  | 424.2207  | 424.2213   | 30.0                  | 23.6      | 63.8       |
| <b>30b</b> {6}  | 386.2438  | 386.2448   | 77.5                  | 67.1      | 98.8       |
| <b>30b</b> {7}  | 424.2207  | 424.2223   | 68.8                  | 54.2      | 94.2       |
| <b>30b</b> {8}  | 381.2285  | 381.2299   | 26.6                  | 23.3      | 97.9       |
| <b>30b</b> {9}  | 370.2489  | 370.2492   | 91.6                  | 82.7      | 81.3       |
| <b>30b</b> {10} | 390.1943  | 390.1949   | 51.3                  | 43.9      | 79.2       |
| <b>30b</b> {11} | 386.2438  | 386.2451   | 60.0                  | 51.9      | 86.3       |
| <b>30b</b> {12} | 424.2207  | 424.2223   | 82.2                  | 64.7      | 99.0       |
| <b>30b</b> {13} | 381.2285  | 381.2291   | 25.0                  | 21.9      | 99.0       |
| <b>30b</b> {14} | 374.2239  | 374.2271   | 70.8                  | 63.2      | 100.0      |
| <b>30b</b> {15} | 398.2802  | 398.2814   | 106.0                 | 88.9      | 99.0       |
| <b>30b</b> {16} | 400.2231  | 400.2246   | 83.3                  | 69.6      | 100.0      |

|                 |          |          |       |      |       |
|-----------------|----------|----------|-------|------|-------|
| <b>30b</b> {17} | 424.1553 | 424.1563 | 16.4  | 12.9 | 86.1  |
| <b>30b</b> {18} | 370.2489 | 370.2498 | 16.3  | 14.7 | 92.9  |
| <b>30b</b> {19} | 360.2282 | 360.2297 | 75.9  | 70.4 | 79.2  |
| <b>30b</b> {20} | 394.2701 | 394.2721 | 103.0 | 87.3 | 98.7  |
| <b>30b</b> {21} | 308.2333 | 308.2346 | 27.8  | 30.2 | 97.0  |
| <b>30b</b> {22} | 336.2646 | 336.2660 | 45.5  | 45.2 | 97.5  |
| <b>30c</b> {1}  | 384.2646 | 384.2647 | 24.8  | 24.9 | 92.5  |
| <b>30c</b> {2}  | 398.2802 | 398.2794 | 25.6  | 24.8 | 100.0 |
| <b>30c</b> {3}  | 418.2256 | 418.2276 | 16.0  | 14.7 | 100.0 |
| <b>30c</b> {4}  | 414.2751 | 414.2776 | 29.7  | 27.6 | 100.0 |
| <b>30c</b> {5}  | 452.2520 | 452.2524 | 10.1  | 8.6  | 76.2  |
| <b>30c</b> {6}  | 414.2751 | 414.2784 | 7.1   | 6.6  | 83.8  |
| <b>30c</b> {7}  | 452.2520 | 452.2522 | 31.2  | 26.6 | 95.3  |
| <b>30c</b> {8}  | 409.2598 | 409.2625 | 20.3  | 19.1 | 88.9  |
| <b>30c</b> {9}  | 398.2802 | 398.2783 | 22.1  | 21.4 | 67.0  |
| <b>30c</b> {10} | 418.2256 | 418.2296 | 29.1  | 26.8 | 100.0 |
| <b>30c</b> {11} | 414.2751 | 414.2773 | 29.8  | 27.7 | 86.5  |
| <b>30c</b> {12} | 452.2520 | 452.2521 | 32.7  | 27.9 | 100.0 |
| <b>30c</b> {13} | 409.2598 | 409.2621 | 21.6  | 20.3 | 93.6  |
| <b>30c</b> {14} | 402.2552 | 402.2558 | 30.9  | 29.6 | 72.3  |
| <b>30c</b> {15} | 426.3115 | 426.3122 | 14.0  | 12.7 | 99.0  |
| <b>30c</b> {16} | 428.2544 | 428.2579 | 7.1   | 6.4  | 0.9   |
| <b>30c</b> {17} | 452.1866 | 452.1900 | 22.0  | 18.8 | 96.8  |
| <b>30c</b> {18} | 398.2802 | 398.2800 | 23.0  | 22.3 | 14.0  |
| <b>30c</b> {19} | 388.2595 | 388.2631 | 26.8  | 26.6 | 100.0 |
| <b>30c</b> {20} | 422.3014 | 422.3027 | 18.0  | 16.4 | 94.0  |
| <b>30c</b> {21} | 336.2646 | 336.2686 | 14.7  | 16.9 | 87.2  |
| <b>30c</b> {22} | 364.2959 | 364.2971 | 32.8  | 34.7 | 100.0 |
| <b>30d</b> {1}  | 432.2646 | 432.2662 | 23.7  | 26.2 | 98.5  |
| <b>30d</b> {2}  | 446.2802 | 446.2825 | 57.8  | 61.8 | 87.2  |
| <b>30d</b> {3}  | 466.2256 | 466.2288 | 23.0  | 23.5 | 96.8  |
| <b>30d</b> {4}  | 462.2751 | 462.2765 | 60.5  | 62.5 | 79.1  |
| <b>30d</b> {5}  | 500.2520 | 500.2492 | 28.6  | 27.3 | 94.3  |
| <b>30d</b> {6}  | 462.2751 | 462.2749 | 50.4  | 52.0 | 95.3  |
| <b>30d</b> {7}  | 500.2520 | 500.2531 | 47.0  | 44.8 | 96.7  |
| <b>30d</b> {8}  | 457.2598 | 457.2616 | 34.4  | 35.9 | 100.0 |
| <b>30d</b> {9}  | 446.2802 | 446.2808 | 19.4  | 20.7 | 95.3  |
| <b>30d</b> {10} | 466.2256 | 466.2277 | 27.6  | 28.3 | 100.0 |
| <b>30d</b> {11} | 462.2751 | 462.2757 | 38.0  | 39.2 | 100.0 |
| <b>30d</b> {12} | 500.2520 | 500.2528 | 54.6  | 52.1 | 98.1  |
| <b>30d</b> {13} | 457.2598 | 457.2627 | 59.8  | 62.4 | 86.5  |
| <b>30d</b> {14} | 450.2552 | 450.2566 | 46.9  | 49.7 | 98.4  |
| <b>30d</b> {15} | 474.3115 | 474.3122 | 40.2  | 40.4 | 100.0 |
| <b>30d</b> {16} | 476.2544 | 476.2544 | 40.8  | 40.9 | 90.5  |
| <b>30d</b> {17} | 500.1866 | -        | 0.0   | 0.0  | -     |
| <b>30d</b> {18} | 446.2802 | 446.2841 | 37.8  | 40.4 | 73.9  |
| <b>30d</b> {19} | 436.2595 | 436.2616 | 51.2  | 56.0 | 100.0 |
| <b>30d</b> {20} | 470.3014 | 470.3048 | 62.1  | 63.0 | 97.3  |
| <b>30d</b> {21} | 384.2646 | 384.2675 | 54.0  | 67.1 | 100.0 |
| <b>30d</b> {22} | 412.2959 | 412.2988 | 51.4  | 59.5 | 98.7  |

### Amines **26** and **S7b-d** from scaffolds **4b-d** and **S5b-d**:

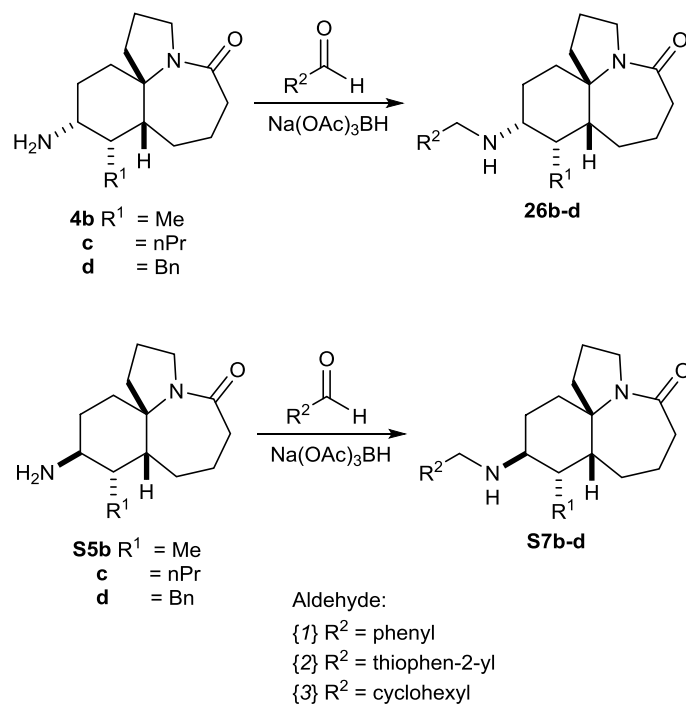

The appropriate aldehyde (1.2 equiv) was added to a solution of amine scaffold **4b-d** or **S5b-d** (200 mg) in anhydrous dichloromethane (6 mL) at rt under argon. Acetic acid (1 equiv) was then added, and the mixture stirred at rt for 1 h. Sodium triacetoxyborohydride (2 equiv) was added, and the mixture stirred at rt for 18 h, then quenched with 2M NaOH (3 mL) and extracted with dichloromethane (3 x 5 mL). The combined organics were dried (Na<sub>2</sub>SO<sub>4</sub>) and concentrated under reduced pressure. The crude product was purified by Combiflash<sup>®</sup> automated column chromatography (12 g silica column, 0% MeOH in CH<sub>2</sub>Cl<sub>2</sub> for 3 min, then 0 to 5% over 10 min) to afford pure amines **26** or **S7b-d**.

| Compound       | Calculated mass | Found mass | Recovered weight (mg) | Yield (%) | Purity (%) |
|----------------|-----------------|------------|-----------------------|-----------|------------|
| <b>26b</b> {1} | 327.2431        | 327.2487   | 430                   | 80.0      | 95.4       |
| <b>26b</b> {2} | 333.1995        | 333.2039   | 360                   | 66.0      | 100.0      |
| <b>26b</b> {3} | 333.2901        | 333.2922   | 325                   | 59.0      | 93.2       |
| <b>26c</b> {1} | 355.2744        | 355.2302   | 198                   | 73.0      | 98.9       |
| <b>26c</b> {2} | 361.2308        | 361.2319   | 213                   | 78.0      | 91.6       |
| <b>26c</b> {3} | 361.3214        | 361.3221   | 213                   | 78.0      | 92.1       |
| <b>26d</b> {1} | 403.2744        | 403.2726   | 145                   | 56.0      | 98.3       |
| <b>26d</b> {2} | 409.2308        | 409.2328   | 230                   | 88.0      | 0.0        |
| <b>26d</b> {3} | 409.3214        | 409.3232   | 170                   | 65.0      | 94.7       |
| <b>S7b</b> {1} | 327.2431        | 327.2454   | 88.8                  | 32.0      | 79.7       |
| <b>S7b</b> {2} | 333.1995        | 333.2016   | 47.9                  | 17.0      | 81.0       |
| <b>S7b</b> {3} | 333.2901        | 333.2908   | 77.5                  | 27.4      | 85.2       |
| <b>S7c</b> {1} | 355.2744        | 355.2742   | 130                   | 48.0      | 96.4       |
| <b>S7c</b> {2} | 361.2308        | 361.2318   | 143                   | 52.0      | 97.7       |
| <b>S7c</b> {3} | 361.3214        | 361.3214   | 170                   | 62.0      | 91.8       |
| <b>S7d</b> {1} | 403.2744        | 403.2743   | 147                   | 57.0      | 95.2       |
| <b>S7d</b> {2} | 409.2308        | 409.2300   | 152                   | 58.0      | 94.8       |
| <b>S7d</b> {3} | 409.3214        | 409.3233   | 90                    | 34.0      | 96.6       |



## General procedure for the preparation of amines **32**

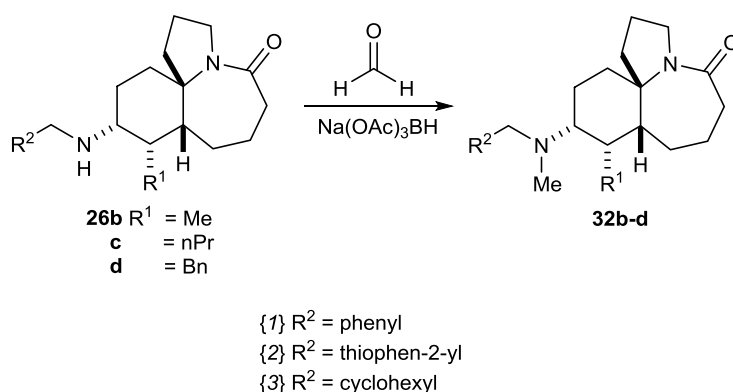

A solution of amine **26b-d** (150 mg) in dichloromethane (3 mL) was placed in a 2 dram screw cap vial. Formaldehyde (37% aq solution, 3 equiv) was added, followed by acetic acid (1 equiv) and sodium triacetoxyborohydride (3 equiv). The reaction mixture was stirred at rt for 18 h, then quenched with 2M NaOH and passed through Isolute hydrophobic phase separator tubes, which allowed the halogenated solvent layer to pass through. The aqueous layers were extracted with dichloromethane (2 x 2 mL). The combined organics were evaporated in a Genevac EZ-2 Plus parallel evaporator and subjected to mass-directed preparative HPLC purification to afford pure amines **32**.

| Compound       | Calculated mass | Found mass | Recovered weight (mg) | Yield (%) | Purity (%) |
|----------------|-----------------|------------|-----------------------|-----------|------------|
| <b>32b</b> {1} | 341.2588        | 341.2610   | 97.4                  | 136.3     | 93.9       |
| <b>32b</b> {2} | 347.2152        | 347.2141   | 41.5                  | 57.1      | 100.0      |
| <b>32b</b> {3} | 347.3057        | 347.3072   | 74.9                  | 103.0     | 94.0       |
| <b>32c</b> {1} | 369.2901        | 369.2906   | 76.2                  | 98.5      | 92.9       |
| <b>32c</b> {2} | 375.2465        | 375.2458   | 79.9                  | 101.7     | 93.7       |
| <b>32c</b> {3} | 375.3370        | 375.3416   | 80.6                  | 102.5     | 90.5       |
| <b>32d</b> {1} | 417.2901        | 417.2896   | 97.5                  | 73.2      | 95.6       |
| <b>32d</b> {2} | 423.2465        | 423.2450   | 86.8                  | 46.7      | 93.2       |
| <b>32d</b> {3} | 423.3370        | 423.3343   | 181.8                 | 97.8      | 90.1       |

## Amines **31b-d** and **S8b-d**:

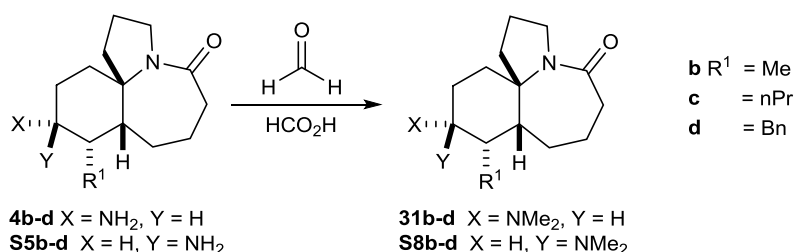

Amine scaffold **4b-d** or **S5b-d** (150 mg) was dissolved in formic acid (900  $\mu$ L) and formaldehyde (37% aq solution, 1.4 mL). The reaction mixture was heated at 95  $^{\circ}$ C for 18 h, then cooled to rt and concentrated under reduced pressure. The residue was made basic with 2M NaOH (2 mL) then extracted with dichloromethane (5 x 3 mL). The combined organics were dried (Na<sub>2</sub>SO<sub>4</sub>) and concentrated under reduced pressure. The residue was subjected to mass-directed preparative HPLC purification to afford pure amines **31** or **S8b-d**.

| Compound   | Calculated mass | Found mass | Recovered weight (mg) | Yield (%) | Purity (%) |
|------------|-----------------|------------|-----------------------|-----------|------------|
| <b>31b</b> | 265.2275        | 265.2284   | 32                    | 28.8      | 100.0      |
| <b>31c</b> | 293.2588        | 293.2600   | 55.1                  | 33.1      | 100.0      |
| <b>31d</b> | 341.2588        | 341.2588   | 49.2                  | 30.1      | 98.3       |
| <b>S8b</b> | 265.2275        | 265.2301   | 65.3                  | 39.2      | 97.7       |
| <b>S8c</b> | 293.2588        | 293.2592   | 187.6                 | 112.6     | 95.5       |
| <b>S8d</b> | 341.2588        | 341.2607   | 60.4                  | 37.0      | 100.0      |

### Characterization data for representative library compounds

#### Quinoline **25**{3}

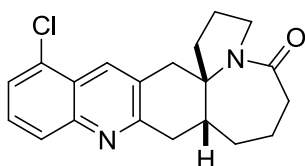

$\delta_{\text{H}}$  (500 MHz,  $\text{CDCl}_3$ ) 8.26 (1H, s), 7.92-7.87 (1H, m), 7.58-7.53 (2H, m), 4.04-3.99 (1H, m), 3.58-3.43 (3H, m), 3.10-3.03 (2H, m), 2.75-2.69 (1H, m), 2.62-2.53 (1H, m), 2.13-1.96 (3H, m), 1.92-1.80 (4H, m), 1.72-1.59 (2H, m);  $\delta_{\text{C}}$  (125 MHz,  $\text{CDCl}_3$ ) 173.5, 157.2, 147.7, 133.0, 130.6, 128.9, 128.8, 127.6, 126.1, 125.0, 63.8, 49.3, 43.3, 41.00, 40.97, 38.3, 34.3, 33.3, 23.1, 20.3;  $m/z$  (ESI+) found  $[\text{M}+\text{H}]^+$  341.1430.  $\text{C}_{20}\text{H}_{22}\text{ClN}_2\text{O}^+$  requires 341.1415.

#### Quinoline **25**{1}

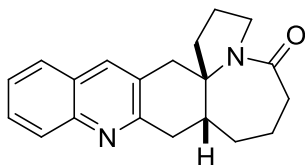

$\delta_{\text{H}}$  (500 MHz,  $\text{CDCl}_3$ ) 7.98 (1H, d,  $J$  8.5), 7.86 (1H, s), 7.74 (1H, d,  $J$  8.1), 7.68-7.64 (1H, m), 7.50-7.46 (1H, m), 4.04-3.99 (1H, m), 3.54-3.43 (3H, m), 3.08 (1H, dd,  $J$  17.8, 2.0), 2.99 (1H, d,  $J$  16.5), 2.75-2.69 (1H, m), 2.61-2.55 (1H, m), 2.12-1.60 (9H, m);  $\delta_{\text{C}}$  (125 MHz,  $\text{CDCl}_3$ ) 173.6, 156.2, 147.1, 136.2, 129.3, 128.3, 127.6, 127.0, 126.9, 126.1, 63.9, 49.3, 43.4, 41.1, 40.6, 38.3, 34.2, 33.3, 23.1, 20.3;  $m/z$  (ESI+) found  $[\text{M}+\text{H}]^+$  307.1816.  $\text{C}_{20}\text{H}_{23}\text{N}_2\text{O}^+$  requires 307.1805.

Amine **26**{3}

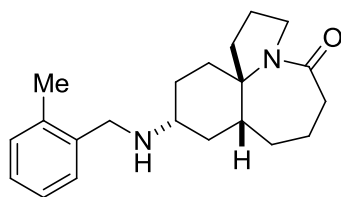

$\delta_{\text{H}}$  (500 MHz,  $\text{CDCl}_3$ ) 7.28-7.25 (1H, m), 7.19-7.16 (3H, m), 3.75-3.67 (3H, m), 3.52-3.45 (1H, m), 2.95-2.91 (1H, m), 2.62-2.45 (3H, m), 2.40-2.35 (1H, m), 2.36 (3H, s), 2.23 (1H, ddd,  $J$  13.3, 13.3, 4.9), 1.92-1.63 (10H, m), 1.53-1.44 (1H, m), 1.36 (1H, ddd,  $J$  13.3, 4.2, 2.5);  $\delta_{\text{C}}$  (125 MHz,  $\text{CDCl}_3$ ) 173.8, 138.6, 136.4, 130.3, 128.6, 127.1, 126.0, 66.6, 51.8, 50.2, 48.7, 43.0, 39.7, 37.2, 35.2, 32.4, 28.4, 25.8, 22.3, 20.4, 19.0;  $m/z$  (ESI+) found  $[\text{M}+\text{H}]^+$  327.2442.  $\text{C}_{21}\text{H}_{30}\text{N}_2\text{O}^+$  requires 327.2431.

Amine **26**{24}

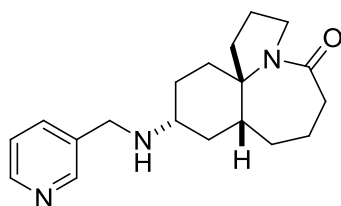

$\delta_{\text{H}}$  (500 MHz,  $\text{CDCl}_3$ ) 8.54 (1H, d,  $J$  1.7), 8.48 (1H, dd,  $J$  4.8, 1.7), 7.64-7.62 (1H, m), 7.24 (1H, ddd,  $J$  7.8, 4.8, 0.7), 3.78-3.66 (3H, m), 3.49-3.43 (1H, m), 2.90-2.85 (1H, m), 2.58-2.44 (3H, m), 2.36-2.31 (1H, m), 2.19 (1H, ddd,  $J$  13.4, 13.4, 4.7), 1.86-1.58 (10H, m), 1.52-1.42 (1H, m), 1.34 (1H, ddd,  $J$  13.4, 4.2, 2.2);  $\delta_{\text{C}}$  (125 MHz,  $\text{CDCl}_3$ ) 173.7, 149.6, 148.5, 136.0, 135.7, 123.4, 66.4, 51.2, 49.3, 48.7, 43.0, 39.7, 37.1, 34.8, 32.2, 28.5, 25.6, 22.2, 20.4;  $m/z$  (ESI+) found  $[\text{M}+\text{H}]^+$  314.2231.  $\text{C}_{19}\text{H}_{28}\text{N}_3\text{O}^+$  requires 314.2227.

Carbamate **27a**{3}

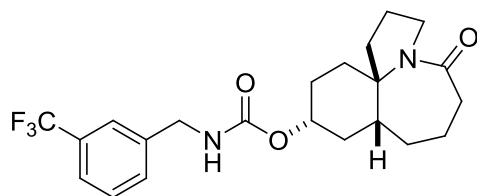

$\delta_{\text{H}}$  (500 MHz,  $\text{CDCl}_3$ ) At ambient temperature, a 4:1 mixture of rotamers was observed. Major rotamer: 7.52-7.40 (4H, m), 5.52 (1H, s), 4.90 (1H, br s), 4.41 (1H, d,  $J$  6.2), 4.38 (1H, d,  $J$  6.2), 3.74-3.68 (1H, m), 3.47-3.40 (1H, m), 2.59-2.53 (1H, m), 2.44-2.23 (3H, m), 2.14-2.08 (1H, m), 1.97-1.92 (1H, m), 1.89-1.53 (9H, m), 1.45-1.33 (2H, m). Minor rotamer (characteristic signals): 5.52 (1H, s), 4.44 (1H, d,  $J$  6.2), 4.35 (1H, d,  $J$  6.2);  $\delta_{\text{C}}$  (125 MHz,  $\text{CDCl}_3$ ) Major rotamer: 174.1, 155.9, 139.8, 130.75, 130.77 (q,  $J$  32.0), 129.0, 124.1 (d,  $J$  3.5), 124.0 (d,  $J$  3.5), 123.9 (q,  $J$  270), 68.4, 66.0, 48.9, 44.3, 43.4, 38.8, 38.4, 35.6, 34.0, 28.5, 24.6, 23.5, 20.1;  $m/z$  (ESI+) found  $[\text{M}+\text{H}]^+$  425.2080.  $\text{C}_{22}\text{H}_{28}\text{F}_3\text{N}_2\text{O}_3^+$  requires 425.2047.

Carbamate **27b**{1}

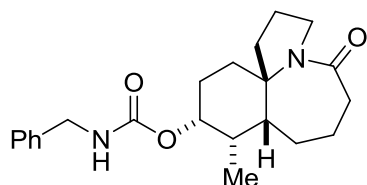

$\delta_{\text{H}}$  (500 MHz,  $\text{CDCl}_3$ ) At ambient temperature, a 7:3 mixture of rotamers was observed. Major rotamer: 7.33-7.19 (5H, m), 5.50 (1H, br s), 4.85 (1H, br s), 4.45-4.23 (2H, m), 3.83-3.71 (1H, m), 3.43-3.29 (1H, m), 2.62-2.53 (1H, m), 2.46-2.32 (2H, m), 2.11-2.00 (2H, m), 1.95-1.12 (11H, m), 0.96 (3H, d,  $J$  6.9). Minor rotamer (characteristic signals): 5.39 (1H, br s), 4.79 (1H, br s), 0.87 (3H, d,  $J$  5.7);  $\delta_{\text{C}}$  (125 MHz,  $\text{CDCl}_3$ ) Major rotamer: 174.6, 156.4, 138.6, 128.7, 127.7, 127.5, 71.7, 67.6, 49.8, 49.1, 45.1, 38.9, 38.8, 37.1, 29.0, 27.8, 24.2, 23.6, 20.2, 15.9;  $m/z$  (ESI+) found  $[\text{M}+\text{H}]^+$  371.2336.  $\text{C}_{22}\text{H}_{31}\text{N}_2\text{O}_3^+$  requires 371.2329.

Carbamate **27c**{4}

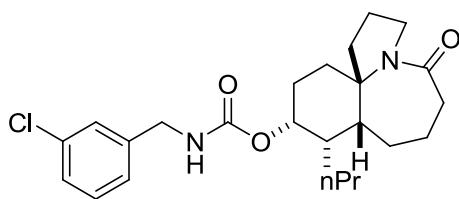

$\delta_{\text{H}}$  (500 MHz,  $\text{CDCl}_3$ ) At ambient temperature, a 7:3 mixture of rotamers was observed. Major rotamer: 7.28-7.09 (4H, m), 5.36 (1H, br s), 4.95 (1H, br s), 4.40-4.25 (2H, m), 3.85-3.74 (1H, m), 3.44-3.30 (1H, m), 2.63-2.58 (1H, m), 2.48-2.37 (2H, m), 2.14-1.50 (11H, m), 1.45-1.11 (6H, m), 0.91-0.80 (3H, m). Minor rotamer (characteristic signals): 5.63 (1H, br s), 4.88 (1H, br s);  $\delta_{\text{C}}$  (125 MHz,  $\text{CDCl}_3$ ) Major rotamer: 174.5, 156.3, 140.8, 134.5, 129.9, 127.58, 127.55, 125.6, 70.7, 67.5, 49.1, 47.7, 44.4, 42.2, 38.9, 38.8, 31.7, 29.0, 27.9, 24.6, 23.7, 20.2, 19.9, 14.2;  $m/z$  (ESI+) found  $[\text{M}+\text{H}]^+$  433.2284.  $\text{C}_{24}\text{H}_{34}\text{ClN}_2\text{O}_3^+$  requires 433.2252.

Carbamate **27d**{19}

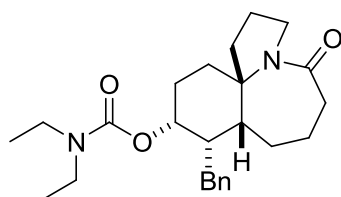

$\delta_{\text{H}}$  (500 MHz,  $\text{CDCl}_3$ ) 7.30-7.26 (2H, m), 7.22-7.18 (1H, m), 7.11-7.08 (2H, m), 4.85 (1H, br s), 3.86-3.79 (1H, m), 3.42-3.27 (5H, m), 2.78 (1H, dd,  $J$  13.6, 7.6), 2.68-2.57 (2H, m), 2.47-2.38 (2H, m), 2.24-2.06 (4H, m), 1.97-1.91 (1H, m), 1.88-1.48 (6H, m), 1.42-1.30 (2H, m), 1.25-1.14 (6H, m);  $\delta_{\text{C}}$  (125 MHz,  $\text{CDCl}_3$ ) 174.3, 155.4, 139.7, 128.8, 128.6, 126.3, 70.2, 67.5, 49.1, 47.4, 45.0, 42.0, 41.4, 39.0, 38.9,

36.3, 28.8, 28.0, 24.6, 23.6, 20.2, 14.4, 13.7;  $m/z$  (ESI+) found  $[M+H]^+$  413.2779.  $C_{25}H_{37}N_2O_3^+$  requires 413.2799.

Amide **28b**{3}

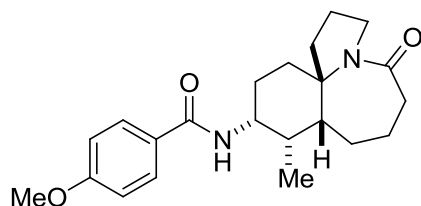

$\delta_H$  (500 MHz,  $CDCl_3$ ) 7.69-7.66 (2H, m), 6.93-6.89 (2H, m), 6.25 (1H, d,  $J$  8.5), 4.30-4.25 (1H, m), 3.82 (3H, s), 3.83-3.78 (1H, m), 3.46-3.39 (1H, m), 2.71-2.65 (1H, m), 2.44 (1H, dd,  $J$  18.0, 18.0), 2.31-2.25 (2H, m), 2.21-2.15 (1H, m), 2.06-1.49 (9H, m), 1.45-1.35 (2H, m), 1.00 (3H, d,  $J$  7.1);  $\delta_C$  (125 MHz,  $CDCl_3$ ) 174.0, 166.7, 162.2, 128.5, 127.1, 113.9, 67.7, 55.5, 50.7, 49.2, 46.8, 39.1, 38.9, 36.7, 29.0, 28.9, 24.4, 23.8, 20.1, 16.5;  $m/z$  (ESI+) found  $[M+H]^+$  371.2342.  $C_{22}H_{31}N_2O_3^+$  requires 371.2329.

Amide **28c**{8}

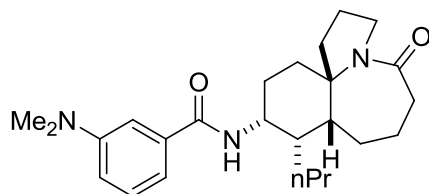

$\delta_H$  (500 MHz,  $CDCl_3$ ) 7.26 (1H, t,  $J$  8.2), 7.17 (1H, dd,  $J$  2.4, 1.7), 6.86 (1H, br d,  $J$  8.2), 6.82 (1H, dd,  $J$  8.2, 2.4), 6.31 (1H, d,  $J$  8.5), 4.35-4.30 (1H, m), 3.85-3.79 (1H, m), 3.47-3.41 (1H, m), 2.97 (6H, s), 2.72-2.65 (1H, m), 2.61-2.57 (1H, m), 2.45-2.37 (1H, m), 2.18-1.86 (7H, m), 1.82-1.58 (4H, m), 1.48-1.24 (6H, m), 0.86 (3H, t,  $J$  7.1);  $\delta_C$  (125 MHz,  $CDCl_3$ ) 173.9, 167.8, 150.8, 135.8, 129.3, 115.1, 113.2, 111.3, 67.7, 49.3, 48.6, 45.6, 41.6, 41.0, 40.4, 39.1, 39.0, 32.4, 29.14, 29.08, 24.8, 23.9, 20.09, 20.05, 14.2;  $m/z$  (ESI+) found  $[M+H]^+$  412.2958.  $C_{25}H_{38}N_3O_2^+$  requires 412.2959.

Amide **28c**{13}

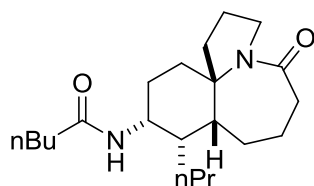

$\delta_H$  (500 MHz,  $CDCl_3$ ) 6.03 (1H, d,  $J$  8.9), 4.04-3.98 (1H, m), 3.68-3.62 (1H, m), 3.30-3.23 (1H, m), 2.50-2.29 (3H, m), 2.04 (2H, td,  $J$  7.9, 1.9), 1.94 (1H, ddd,  $J$  13.7, 13.7, 4.5), 1.85-1.70 (4H, m), 1.66-1.38 (8H, m), 1.29-1.02 (8H, m), 0.77 (3H, t,  $J$  7.4), 0.72 (3H, t,  $J$  7.5);  $\delta_C$  (125 MHz,  $CDCl_3$ ) 174.0, 172.6,

67.6, 49.0, 48.3, 44.6, 41.6, 38.77, 38.76, 36.6, 32.2, 29.2, 28.2, 27.9, 24.8, 23.7, 22.3, 20.0, 19.9, 14.1, 13.8;  $m/z$  (ESI+) found  $[M+H]^+$  349.2879.  $C_{21}H_{36}N_2O_2^+$  requires 349.2850.

Amide **28d**{11}

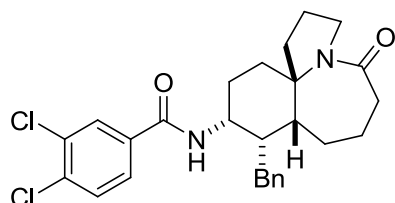

$\delta_H$  (500 MHz,  $CDCl_3$ ) 7.88 (1H, br s), 7.59-7.55 (2H, m), 7.73-7.26 (2H, m), 7.23-7.19 (1H, m), 7.12-7.09 (2H, m), 6.39 (1H, d,  $J$  8.5), 4.40-4.35 (1H, m), 3.81 (1H, dd,  $J$  10.5, 10.5), 3.40-3.33 (1H, m), 2.84 (1H, dd,  $J$  13.9, 6.6), 2.72-2.66 (1H, m), 2.63-2.54 (2H, m), 2.46-2.38 (2H, m), 2.34-2.29 (1H, m), 2.10-1.89 (3H, m), 1.80-1.61 (4H, m), 1.56-1.47 (3H, m), 1.38-1.28 (1H, m);  $\delta_C$  (125 MHz,  $CDCl_3$ ) 173.7, 164.9, 139.0, 136.2, 134.6, 133.4, 130.8, 129.3, 128.7, 128.6, 126.5, 125.7, 67.4, 49.3, 47.6, 46.4, 44.3, 39.1, 38.9, 36.4, 29.2, 29.1, 24.7, 23.6, 19.9;  $m/z$  (ESI+) found  $[M+H]^+$  485.1770.  $C_{27}H_{31}Cl_2N_2O_2^+$  requires 485.1757.

Sulfonamide **29b**{2}

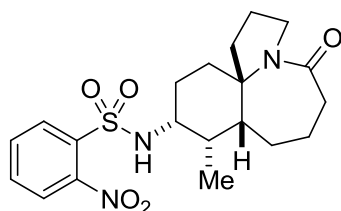

Mp 227-229 °C;  $\nu_{max}$  (film)/ $cm^{-1}$  2942, 1591, 1539;  $\delta_H$  (500 MHz,  $CDCl_3$ ) 8.12-8.08 (1H, m), 7.91-7.86 (1H, m), 7.78-7.73 (2H, m), 5.55 (1H, d,  $J$  7.0), 3.85-3.79 (1H, m), 3.50-3.41 (2H, m), 2.71 (1H, dd,  $J$  15.3, 6.7), 2.49-2.40 (2H, m), 2.21-2.01 (3H, m), 1.98-1.90 (1H, m), 1.86-1.32 (9H, m), 0.84 (3H, d,  $J$  7.1);  $\delta_C$  (125 MHz,  $CDCl_3$ ) 174.2 (C), 147.9 (C), 133.9 (C), 133.7 (CH), 132.9 (CH), 130.8 (CH), 125.6 (CH), 67.2 (C), 53.2 (CH), 50.3 (CH), 49.2 (CH<sub>2</sub>), 39.1 (CH<sub>2</sub>), 39.0 (CH<sub>2</sub>), 36.8 (CH), 30.0 (CH<sub>2</sub>), 28.6 (CH<sub>2</sub>), 23.9 (CH<sub>2</sub>), 23.6 (CH<sub>2</sub>), 20.0 (CH<sub>2</sub>), 16.3 (CH<sub>3</sub>);  $m/z$  (ESI+) found  $[M+H]^+$  422.1765.  $C_{20}H_{28}N_3O_5S^+$  requires 422.1744.

Sulfonamide **29c**{8}

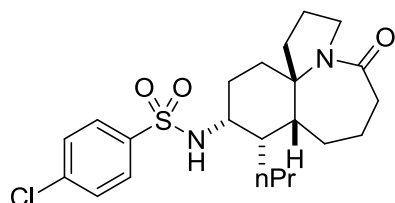

Mp 207-208 °C;  $\delta_{\text{H}}$  (500 MHz,  $\text{CDCl}_3$ ) 7.87-7.83 (2H, m), 7.52-7.49 (2H, m), 5.29 (1H, d,  $J$  7.1), 3.81-3.76 (1H, m), 3.44-3.37 (1H, m), 3.27-3.23 (1H, m), 2.59 (1H, dd,  $J$  15.2, 6.7), 2.41-2.31 (2H, m), 2.07-2.00 (1H, m), 1.92-1.87 (1H, m), 1.84-1.79 (1H, m), 1.76-1.56 (7H, m), 1.53-1.48 (1H, m), 1.38-0.94 (6H, m), 0.78 (3H, t,  $J$  7.1);  $\delta_{\text{C}}$  (125 MHz,  $\text{CDCl}_3$ ) 172.5 (C), 137.4 (C), 136.5 (C), 127.5 (CH), 126.8 (CH), 65.2 (C), 48.7 (CH), 47.2 ( $\text{CH}_2$ ), 46.3 (CH), 40.2 (CH), 37.1 ( $\text{CH}_2$ ), 36.8 ( $\text{CH}_2$ ), 30.3 ( $\text{CH}_2$ ), 27.3 ( $\text{CH}_2$ ), 26.5 ( $\text{CH}_2$ ), 22.4 ( $\text{CH}_2$ ), 21.6 ( $\text{CH}_2$ ), 18.1 ( $\text{CH}_2$ ), 18.0 ( $\text{CH}_2$ ), 12.1 ( $\text{CH}_3$ );  $m/z$  (ESI+) found  $[\text{M}+\text{H}]^+$  439.1808.  $\text{C}_{22}\text{H}_{32}\text{ClN}_2\text{O}_3\text{S}^+$  requires 439.1817.

#### Sulfonamide **29d**{19}

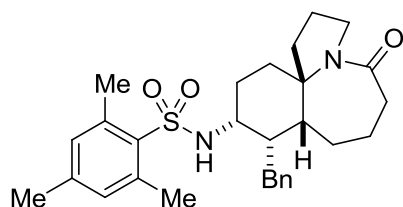

$\delta_{\text{H}}$  (500 MHz,  $\text{CDCl}_3$ ) 7.26-7.21 (2H, m), 7.20-7.16 (1H, m), 6.98-6.95 (4H, m), 4.92 (1H, d,  $J$  7.9), 3.77-3.72 (1H, m), 3.43-3.38 (1H, m), 3.36-3.29 (1H, m), 2.67 (6H, s), 2.67-2.62 (1H, m), 2.58-2.52 (1H, m), 2.44-2.35 (3H, m), 2.29 (3H, s), 2.23-2.18 (1H, m), 2.14-2.09 (1H, m), 2.01 (1H, ddd,  $J$  13.5, 13.5, 5.1), 1.89-1.55 (6H, m), 1.46-1.33 (3H, m), 1.26-1.18 (1H, m);  $\delta_{\text{C}}$  (125 MHz,  $\text{CDCl}_3$ ) 174.0, 142.5, 139.1, 139.0, 134.1, 132.1, 128.6, 128.5, 126.3, 67.2, 51.1, 49.1, 46.9, 44.2, 38.90, 38.85, 35.9, 29.3, 28.6, 24.3, 23.4, 23.2, 21.0, 19.9;  $m/z$  (ESI+) found  $[\text{M}+\text{H}]^+$  495.2667.  $\text{C}_{29}\text{H}_{38}\text{N}_2\text{O}_3\text{S}^+$  requires 495.2676.

#### Sulfonamide **29d**{22}

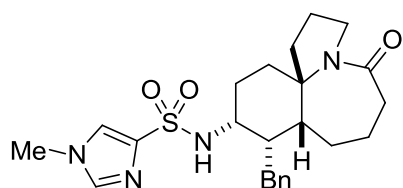

$\delta_{\text{H}}$  (500 MHz,  $\text{CDCl}_3$ ) 7.49 (1H, d,  $J$  1.2), 7.46 (1H, d,  $J$  1.2), 7.26-7.22 (2H, m), 7.18-7.14 (1H, m), 7.11-7.08 (2H, m), 5.57 (1H, d,  $J$  7.5), 3.74-3.70 (1H, m), 3.70 (3H, s), 3.52-3.47 (1H, m), 3.30-3.23 (1H, m), 2.78 (1H, dd,  $J$  14.4, 10.2), 2.68 (1H, dd,  $J$  14.4, 5.1), 2.57-2.52 (1H, m), 2.42-2.35 (2H, m), 2.23-2.18 (1H, m), 2.14-2.06 (2H, m), 1.85-1.51 (6H, m), 1.42-1.35 (1H, m), 1.32-1.27 (2H, m), 1.21-1.10 (1H, m);  $\delta_{\text{C}}$  (125 MHz,  $\text{CDCl}_3$ ) 174.3, 140.2, 139.6, 139.1, 128.7, 128.5, 126.1, 124.4, 67.3, 51.6, 49.0, 46.3, 44.1, 38.8, 38.6, 35.9, 34.0, 29.2, 27.9, 24.5, 23.4, 19.9;  $m/z$  (ESI+) found  $[\text{M}+\text{H}]^+$  457.2260.  $\text{C}_{24}\text{H}_{33}\text{N}_4\text{O}_3\text{S}^+$  requires 457.2268.

Urea **30d**{21}

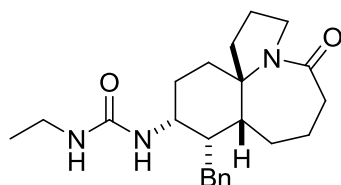

$\delta_{\text{H}}$  (500 MHz,  $\text{CDCl}_3$ ) 7.28-7.25 (2H, m), 7.20-7.17 (1H, m), 7.14-7.12 (2H, m), 5.43 (1H, d,  $J$  8.5), 5.34 (1H, t,  $J$  5.0), 4.03-4.01 (1H, m), 3.79-3.75 (1H, m), 3.37-3.31 (1H, m), 3.20 (2H, qd,  $J$  7.2, 5.0), 2.85 (1H, dd,  $J$  14.0, 6.1), 2.62-2.51 (3H, m), 2.37 (1H, dd,  $J$  13.8, 13.8), 2.27-2.22 (1H, m), 2.15-2.09 (1H, m), 2.02 (1H, ddd,  $J$  13.4, 13.4, 4.1), 1.94-1.86 (1H, m), 1.80-1.63 (5H, m), 1.53-1.47 (1H, m), 1.40-1.37 (2H, m), 1.27-1.19 (1H, m), 1.09 (3H, t,  $J$  7.2);  $\delta_{\text{C}}$  (125 MHz,  $\text{CDCl}_3$ ) 174.2, 158.5, 139.9, 128.7, 128.5, 126.1, 68.0, 49.2, 47.1, 46.2, 44.6, 38.9, 38.8, 36.3, 35.0, 30.2, 28.3, 24.9, 23.6, 20.0, 15.6;  $m/z$  (ESI+) found  $[\text{M}+\text{H}]^+$  384.2675.  $\text{C}_{23}\text{H}_{34}\text{N}_3\text{O}_2^+$  requires 384.2646.

Amine **26d**{1}

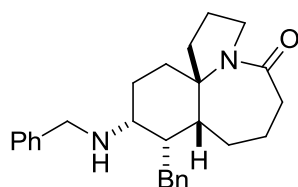

$\nu_{\text{max}}$  (film)/ $\text{cm}^{-1}$  2931, 2868, 1608;  $\delta_{\text{H}}$  (500 MHz,  $\text{CDCl}_3$ ) 7.40-7.36 (4H, m), 7.32-7.27 (3H, m), 7.23-7.19 (1H, m), 7.12-7.10 (2H, m), 3.86-3.79 (2H, m), 3.50 (1H, d,  $J$  13.1), 3.40 (1H, ddd,  $J$  12.3, 9.7, 7.7), 2.74 (1H, dd,  $J$  13.5, 8.2), 2.69-2.62 (3H, m), 2.56-2.34 (3H, m), 2.26-2.20 (2H, m), 2.01-1.96 (1H, m), 1.92-1.82 (2H, m), 1.75-1.52 (4H, m), 1.49-1.45 (1H, m), 1.36-1.24 (2H, m);  $\delta_{\text{C}}$  (125 MHz,  $\text{CDCl}_3$ ) 174.7 (C), 141.0 (C), 140.3 (C), 128.7 (CH), 128.5 (CH), 128.4 (CH), 128.2 (CH), 127.0 (CH), 126.2 (CH), 68.3 (C), 54.0 (CH), 53.1 (CH)<sub>2</sub>, 49.1 (CH)<sub>2</sub>, 48.5 (CH), 45.8 (CH), 39.1 (CH)<sub>2</sub>, 39.0 (CH)<sub>2</sub>, 36.7 (CH)<sub>2</sub>, 29.2 (CH)<sub>2</sub>, 27.0 (CH)<sub>2</sub>, 24.7 (CH)<sub>2</sub>, 23.5 (CH)<sub>2</sub>, 20.2 (CH)<sub>2</sub>;  $m/z$  (ESI+) found  $[\text{M}+\text{H}]^+$  403.2726.  $\text{C}_{27}\text{H}_{35}\text{N}_2\text{O}^+$  requires 403.2744.

Amine **32b**{2}

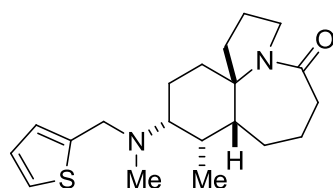

$\delta_{\text{H}}$  (500 MHz,  $\text{CDCl}_3$ ) 7.18 (1H, dd,  $J$  5.1, 1.2), 6.91 (1H, dd,  $J$  5.1, 3.4), 6.86 (1H, dd,  $J$  3.4, 1.2), 3.84-3.78 (2H, m), 3.74 (1H, d,  $J$  14.3), 3.45-3.38 (1H, m), 2.64-2.59 (2H, m), 2.52-2.38 (2H, m), 2.23 (3H, s), 2.19-2.14 (2H, m), 2.08-1.96 (3H, m), 1.92-1.85 (1H, m), 1.76-1.64 (4H, m), 1.50-1.31 (3H, m), 1.19 (3H, d,  $J$  7.3);  $\delta_{\text{C}}$  (125 MHz,  $\text{CDCl}_3$ ) 174.7, 144.6, 126.2, 124.9, 124.4, 67.9, 59.8, 57.3, 51.4, 49.0, 41.0,



39.8, 39.7, 38.9, 27.9, 27.2, 25.3, 23.6, 20.3, 18.3;  $m/z$  (ESI+) found  $[M+H]^+$  347.2141.  $C_{20}H_{31}N_2O^+$  requires 347.2152.

**Amine 31b**

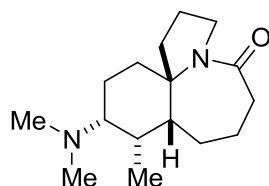

$\delta_H$  (500 MHz,  $CDCl_3$ ) 3.80-3.74 (1H, m), 3.44-3.38 (1H, m), 2.59-2.54 (1H, m), 2.48-2.40 (2H, m), 2.24 (6H, s), 2.24-2.14 (2H, m), 2.04-1.94 (4H, m), 1.85-1.79 (1H, m), 1.74-1.58 (4H, m), 1.50-1.44 (1H, m), 1.38-1.30 (2H, m), 1.12 (3H, d,  $J$  7.4);  $\delta_C$  (125 MHz,  $CDCl_3$ ) 174.6, 67.9, 62.6, 50.9, 48.9, 45.7, 40.2, 39.6, 38.5, 27.4, 26.9, 25.7, 23.3, 20.4, 18.6;  $m/z$  (ESI+) found  $[M+H]^+$  265.2284.  $C_{16}H_{29}N_2O^+$  requires 265.2274.

## B. Cylindricine-inspired libraries

### General procedures for library preparation and tabulated results.

#### Amines 33

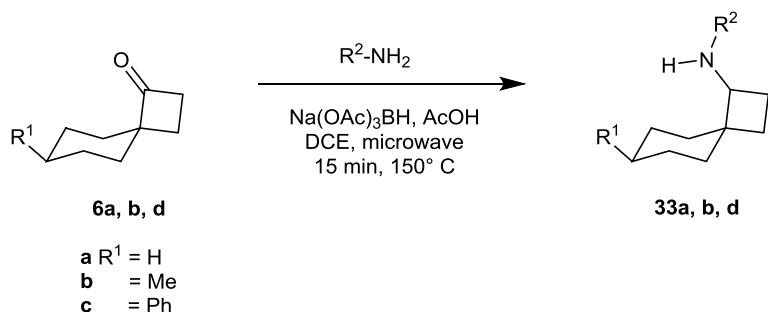

Amines:

- |                                                         |                                                 |
|---------------------------------------------------------|-------------------------------------------------|
| {1} R <sup>2</sup> = 4-Methylbenzyl                     | {17} R <sup>2</sup> = 2-Phenethyl               |
| {2} R <sup>2</sup> = 3,4-Dichlorobenzyl                 | {18} R <sup>2</sup> = 3-Fluorobenzyl            |
| {3} R <sup>2</sup> = 2-Methoxybenzyl                    | {19} R <sup>2</sup> = 4-Chlorobenzyl            |
| {4} R <sup>2</sup> = 2-Chlorobenzyl                     | {20} R <sup>2</sup> = 3-Methoxybenzyl           |
| {5} R <sup>2</sup> = 3-Chlorobenzyl                     | {21} R <sup>2</sup> = 3-(Trifluoromethyl)benzyl |
| {6} R <sup>2</sup> = 3-Fluorobenzyl                     | {22} R <sup>2</sup> = 4-Bromobenzyl             |
| {7} R <sup>2</sup> = 3-(Trifluoromethyl)-4-Chlorobenzyl | {23} R <sup>2</sup> = Furfuryl                  |
| {8} R <sup>2</sup> = 3,4-Dimethoxybenzyl                | {24} R <sup>2</sup> = Benzyl                    |
| {9} R <sup>2</sup> = 2-(Trifluoromethyl)benzyl          | {25} R <sup>2</sup> = 4-Methoxybenzyl           |
| {10} R <sup>2</sup> = 5-Methylfurfuryl                  | {26} R <sup>2</sup> = 2-Methylthiophene         |
| {11} R <sup>2</sup> = (S)-(alpha)-Methylbenzyl          | {27} R <sup>2</sup> = 4-Chlorobenzyl            |
| {12} R <sup>2</sup> = 4-(Trifluoromethyl)benzyl         | {28} R <sup>2</sup> = 2-Methylbenzyl            |
| {13} R <sup>2</sup> = 3-Methylbenzyl                    | {29} R <sup>2</sup> = 2, 4-Difluorobenzyl       |
| {14} R <sup>2</sup> = 4-Fluorobenzyl                    | {30} R <sup>2</sup> = 3-Iodobenzyl              |
| {15} R <sup>2</sup> = 4-Ethylpyridine                   | {31} R <sup>2</sup> = 3,5-Dichlorobenzyl        |
| {16} R <sup>2</sup> = 3-Methylpyridine                  | {32} R <sup>2</sup> = Phenyl                    |

A solution of spiro[3.5]nonan-1-one **6** (90 mg) in DCE (1.5 mL) was added to an oven dried 5 mL microwave reaction vessel. To the solution was added acetic acid (2 equiv.), sodium triacetoxyborohydride (2.25 equiv.), and the appropriate amine (2.25 mmol). The reaction was conducted utilizing a Biotage® Initiator microwave synthesizer equipped with Robot Eight® platform. Reactions were irradiated at 150° for 15 min. Upon completion, the reaction was cooled to room temperature and quenched with saturated aqueous sodium bicarbonate. The reactions were passed through Isolute hydrophobic phase separator tubes, which allowed the halogenated solvent layer to pass through. The aqueous layers were extracted with dichloromethane (2 x 2 mL). The combined organics were evaporated in a Genevac EZ-2 Plus parallel evaporator and subjected to mass-directed preparative HPLC purification to afford pure amines **33**.

| Compound       | Cal. Mass | Found mass | Recovered weight (mg) | Yield (%) | Purity (%) |
|----------------|-----------|------------|-----------------------|-----------|------------|
| <b>33a</b> {1} | 244.206   | 244.2074   | 37.9                  | 43        | 94.3       |
| <b>33a</b> {2} | 298.1124  | 298.1131   | 32                    | 30        | 93.9       |
| <b>33a</b> {3} | 260.2009  | 260.202    | 20                    | 21        | 93         |
| <b>33a</b> {4} | 264.1514  | 264.1527   | 41.5                  | 44        | 94.9       |
| <b>33a</b> {6} | 248.1809  | 248.1818   | 18.2                  | 20        | 93         |

|                 |          |          |      |     |      |
|-----------------|----------|----------|------|-----|------|
| <b>33a</b> {8}  | 290.2115 | 290.2115 | 47.1 | 45  | 96.2 |
| <b>33a</b> {9}  | 298.1777 | 298.1796 | 31.5 | 29  | 91.9 |
| <b>33a</b> {10} | 234.1853 | 234.1857 | 32.4 | 38  | 99.5 |
| <b>33a</b> {11} | 244.206  | 244.2063 | 21.8 | 25  | 97.5 |
| <b>33a</b> {12} | 298.1777 | 298.1789 | 25.1 | 23  | 88.3 |
| <b>33a</b> {13} | 244.206  | 244.2072 | 29.6 | 34  | 86.9 |
| <b>33a</b> {14} | 248.1809 | 248.181  | 45.7 | 51  | 41.2 |
| <b>33a</b> {16} | 231.1856 | 231.1859 | 18.9 | 23  | 78.1 |
| <b>33a</b> {19} | 264.1514 | 264.152  | 8.1  | 8   | 88.9 |
| <b>33a</b> {20} | 260.2009 | 260.2012 | 34.8 | 37  | 89.3 |
| <b>33a</b> {21} | 298.1777 | 298.1797 | 62.3 | 58  | 94.8 |
| <b>33a</b> {26} | 236.1468 | 236.1475 | 21.9 | 26  | 75.9 |
| <b>33a</b> {28} | 244.206  | 244.2074 | 10.9 | 12  | 88.2 |
| <b>33a</b> {29} | 332.1388 | 332.14   | 22.4 | 19  | 93.8 |
| <b>33b</b> {2}  | 312.128  | 312.1284 | 51.8 | 42  | 81.7 |
| <b>33b</b> {3}  | 274.2165 | 274.2168 | 43.2 | 40  | 82.8 |
| <b>33b</b> {4}  | 278.167  | 278.1673 | 37.2 | 34  | 82.3 |
| <b>33b</b> {5}  | 278.167  | 278.1679 | 47.3 | 43  | 94.2 |
| <b>33b</b> {8}  | 304.2271 | 304.2279 | 57.3 | 48  | 88.4 |
| <b>33b</b> {9}  | 312.1933 | 312.1941 | 37.4 | 30  | 87.3 |
| <b>33b</b> {10} | 248.2009 | 248.2006 | 4.5  | 5   | 55.9 |
| <b>33b</b> {11} | 258.2216 | 258.2222 | 33   | 33  | 95   |
| <b>33b</b> {12} | 312.1933 | 312.1942 | 76.7 | 62  | 94.8 |
| <b>33b</b> {13} | 258.2216 | 258.2224 | 55.8 | 55  | 93.7 |
| <b>33b</b> {14} | 262.1965 | 262.1974 | 48.9 | 47  | 87.8 |
| <b>33b</b> {16} | 245.2012 | 245.2023 | 70.5 | 73  | 90.3 |
| <b>33b</b> {23} | 234.1852 | 234.1842 | 0.8  | 1   | 56.7 |
| <b>33b</b> {24} | 244.206  | 244.2066 | 20.9 | 22  | 89.5 |
| <b>33b</b> {25} | 274.2165 | 274.2177 | 73.1 | 68  | 94.7 |
| <b>33d</b> {1}  | 320.2373 | 320.2393 | 22.3 | 35  | 77.5 |
| <b>33d</b> {3}  | 336.2322 | 336.2347 | 32.2 | 48  | 90   |
| <b>33d</b> {4}  | 340.1827 | 340.1813 | 44.9 | 66  | 72.7 |
| <b>33d</b> {5}  | 340.1827 | 340.1835 | 50.3 | 74  | 53   |
| <b>33d</b> {6}  | 324.2122 | 324.2149 | 26.2 | 40  | 93.8 |
| <b>33d</b> {7}  | 408.1701 | 408.1729 | 61.3 | 75  | 94.6 |
| <b>33d</b> {8}  | 366.2428 | 366.2454 | 49.3 | 67  | 98.4 |
| <b>33d</b> {9}  | 374.209  | 366.2454 | 93.1 | 124 | 55.1 |
| <b>33d</b> {10} | 310.2166 | 310.208  | 49.9 | 80  | 96.5 |
| <b>33d</b> {12} | 374.209  | 374.2096 | 53.6 | 72  | 36.6 |
| <b>33d</b> {13} | 320.2373 | 320.2396 | 28.6 | 45  | 81.8 |
| <b>33d</b> {16} | 307.2169 | 307.2085 | 11.7 | 19  | 61.9 |
| <b>33d</b> {19} | 340.1827 | 340.1841 | 15.6 | 23  | 87.4 |
| <b>33d</b> {20} | 336.2322 | 336.2346 | 25.8 | 38  | 87.8 |
| <b>33d</b> {22} | 384.1322 | 384.1329 | 28.4 | 37  | 79.8 |
| <b>33d</b> {23} | 296.2009 | 296.2029 | 19.5 | 33  | 89.8 |
| <b>33d</b> {26} | 312.1781 | 312.1801 | 20.4 | 33  | 95.4 |
| <b>33d</b> {28} | 320.2373 | 320.2397 | 32   | 50  | 91.4 |
| <b>33d</b> {31} | 374.1437 | 374.1448 | 31.3 | 42  | 94.6 |

## Carbamates 34

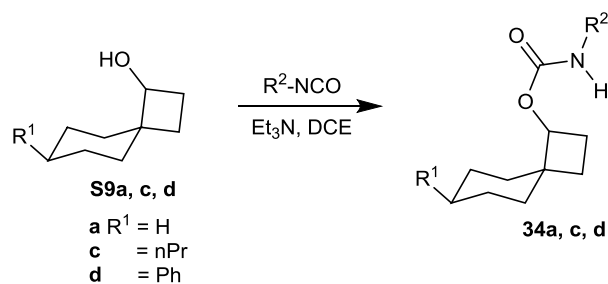

Isocyanate:

- |                                                 |                                                 |
|-------------------------------------------------|-------------------------------------------------|
| {1} R <sup>2</sup> = 4-Chlorophenyl             | {16} R <sup>2</sup> = 3,4-methylenedioxy phenyl |
| {2} R <sup>2</sup> = 4-Bromophenyl              | {17} R <sup>2</sup> = 4-Cyanophenyl             |
| {3} R <sup>2</sup> = 4-Fluorophenyl             | {18} R <sup>2</sup> = 3-(Trifluoromethyl)phenyl |
| {4} R <sup>2</sup> = 2-Chlorophenyl             | {19} R <sup>2</sup> = nButyl                    |
| {5} R <sup>2</sup> = 2-Methoxyphenyl            | {20} R <sup>2</sup> = 4-Pentylphenyl            |
| {6} R <sup>2</sup> = 4-Methylphenyl             | {21} R <sup>2</sup> = Ethyl butyrate            |
| {7} R <sup>2</sup> = 2-Fluorophenyl             | {22} R <sup>2</sup> = 3-Fluorophenyl            |
| {8} R <sup>2</sup> = 4-(Trifluoromethyl)phenyl  | {23} R <sup>2</sup> = 4-Ethylphenethyl          |
| {9} R <sup>2</sup> = 2-Methylphenyl             | {24} R <sup>2</sup> = 3-Phenylpropyl            |
| {10} R <sup>2</sup> = 3-Chlorophenyl            | {25} R <sup>2</sup> = 2,6-dimethoxyphenyl       |
| {11} R <sup>2</sup> = Phenyl                    | {26} R <sup>2</sup> = Furfuryl                  |
| {12} R <sup>2</sup> = 2-(Trifluoromethyl)phenyl | {27} R <sup>2</sup> = Benzyl                    |
| {13} R <sup>2</sup> = 3,5-dimethylphenyl        | {28} R <sup>2</sup> = 2,4-dichlorophenyl        |
| {14} R <sup>2</sup> = <sup>t</sup> Butyl        | {29} R <sup>2</sup> = 3,5-difluorophenyl        |
| {15} R <sup>2</sup> = 4-Chlorobenzyl            | {30} R <sup>2</sup> = 4-Isopropylphenyl         |

Each reaction tube of a 24-position Bohdan Miniblock XT was flushed with argon, then a solution of the alcohol scaffold **59** (75 mg) in anhydrous tetrahydrofuran (1.2 mL) was added, followed by the appropriate isocyanate (2 equiv) and Et<sub>3</sub>N (2.5 equiv). The reactions were shaken at 500 rpm at rt for 18 h, then water (2 mL) and dichloromethane (3 mL) added. The reactions were passed through Isolute hydrophobic phase separator tubes, which allowed the halogenated solvent layer to pass through. The aqueous layers were extracted with dichloromethane (2 x 2 mL). The combined organics were evaporated in a Genevac EZ-2 Plus parallel evaporator and subjected to mass-directed preparative HPLC purification to afford pure carbamates **34**.

| Compound        | Cal. Mass | Found mass | Recovered weight (mg) | Yield (%) | Purity (%) |
|-----------------|-----------|------------|-----------------------|-----------|------------|
| <b>34a</b> {1}  | 292.1110  | 292.1093   | 65                    | 74        | 92.8       |
| <b>34a</b> {2}  | 336.0604  | 336.0582   | 57.4                  | 57        | 93.9       |
| <b>34a</b> {3}  | 276.1405  | 276.1372   | 62.8                  | 76        | 100        |
| <b>34a</b> {5}  | 290.1751  | 290.1757   | 41.2                  | 47        | 100        |
| <b>34a</b> {6}  | 274.1802  | 274.1814   | 71.9                  | 87        | 99         |
| <b>34a</b> {8}  | 326.1373  | 326.1333   | 90.6                  | 93        | 100        |
| <b>34a</b> {9}  | 274.1802  | 274.1811   | 68.4                  | 83        | 98.8       |
| <b>34a</b> {10} | 292.1110  | 292.1064   | 75                    | 86        | 100        |
| <b>34a</b> {11} | 258.1499  | 258.1472   | 57                    | 74        | 100        |
| <b>34a</b> {14} | 328.2282  | 328.2237   | 107                   | 109       | 68.6       |
| <b>34a</b> {15} | 276.1405  | 276.1357   | 76.8                  | 93        | 100        |
| <b>34a</b> {16} | 302.1398  | 304.1562   | 90                    | 100       | 95.8       |
| <b>34a</b> {18} | 326.1373  | 326.1316   | 72.3                  | 74        | 98.7       |
| <b>34a</b> {23} | 316.2271  | 316.2306   | 19.4                  | 20        | 85         |
| <b>34a</b> {37} | 288.1958  | 288.1984   | 78.4                  | 91        | 100        |
| <b>34c</b> {3}  | 318.1875  | 318.1852   | 47.2                  | 49        | 100        |
| <b>34c</b> {5}  | 330.2074  | 330.2013   | 42.2                  | 43        | 100        |

|                |          |          |       |     |      |
|----------------|----------|----------|-------|-----|------|
| <b>34c{6}</b>  | 314.2125 | 314.2066 | 32.3  | 34  | 100  |
| <b>34c{7}</b>  | 318.1875 | 318.1829 | 8.7   | 9   | 100  |
| <b>34c{9}</b>  | 314.2125 | 314.2058 | 35.3  | 37  | 100  |
| <b>34c{10}</b> | 334.1579 | 334.1513 | 44    | 44  | 100  |
| <b>34c{13}</b> | 328.2282 | 328.2257 | 18.7  | 19  | 100  |
| <b>34c{16}</b> | 344.1867 | 344.1818 | 25.7  | 25  | 100  |
| <b>34c{18}</b> | 368.1843 | 368.1804 | 68.4  | 62  | 100  |
| <b>34c{25}</b> | 360.2180 | 360.2131 | 10.5  | 10  | 100  |
| <b>34c{26}</b> | 320.1689 | 320.1690 | 23.9  | 25  | 100  |
| <b>34c{30}</b> | 342.2438 | 342.1933 | 9     | 9   | 100  |
| <b>34d{1}</b>  | 306.1266 | 306.1212 | 57.1  | 62  | 95.1 |
| <b>34d{2}</b>  | 412.0917 | 431.1362 | 119   | 96  | 95.5 |
| <b>34d{3}</b>  | 352.1718 | 352.1686 | 82    | 78  | 100  |
| <b>34d{4}</b>  | 359.1765 | 359.1739 | 69.3  | 64  | 100  |
| <b>34d{5}</b>  | 368.1423 | 368.1425 | 31.3  | 28  | 91.5 |
| <b>34d{7}</b>  | 352.1718 | 352.1712 | 35.3  | 33  | 100  |
| <b>34d{8}</b>  | 402.1686 | 402.1642 | 90.2  | 75  | 100  |
| <b>34d{9}</b>  | 350.2115 | 350.2129 | 70.7  | 67  | 100  |
| <b>34d{10}</b> | 368.1423 | 368.1389 | 83.5  | 76  | 100  |
| <b>34d{12}</b> | 402.1686 | 402.1624 | 83.3  | 69  | 100  |
| <b>34d{15}</b> | 384.1725 | 384.1755 | 99.1  | 86  | 100  |
| <b>34d{16}</b> | 380.1857 | 380.1871 | 62    | 113 | 96.4 |
| <b>34d{17}</b> | 359.1765 | 378.2201 | 89.4  | 83  | 100  |
| <b>34d{18}</b> | 402.1686 | 402.1681 | 91.4  | 76  | 100  |
| <b>34d{19}</b> | 316.2271 | 316.2291 | 29.9  | 32  | 100  |
| <b>34d{20}</b> | 406.2741 | 406.2773 | 111.3 | 91  | 84.3 |
| <b>34d{21}</b> | 374.2326 | 374.2346 | 60.8  | 54  | 98   |
| <b>34d{22}</b> | 352.1718 | 352.1731 | 77.3  | 73  | 100  |
| <b>34d{23}</b> | 392.2584 | 392.2593 | 19.1  | 16  | 93.8 |
| <b>34d{25}</b> | 394.2024 | 394.1989 | 42.6  | 36  | 99   |
| <b>34d{26}</b> | 338.1761 | 338.1732 | 69.3  | 68  | 100  |
| <b>34d{27}</b> | 348.1969 | 348.1926 | 51.4  | 49  | 100  |
| <b>34d{28}</b> | 402.1033 | 402.0957 | 57.6  | 48  | 95.3 |
| <b>34d{29}</b> | 370.1624 | 370.1594 | 76.7  | 69  | 100  |
| <b>34d{30}</b> | 376.2282 | 376.2230 | 44.7  | 40  | 100  |
| <b>34d{35}</b> | 402.1033 | 402.0996 | 88    | 73  | 100  |

## Thiocarbamates

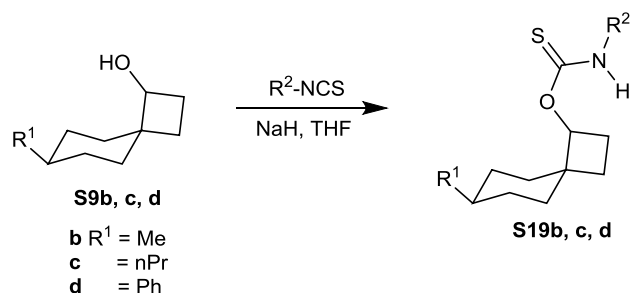

Isothiocyanates:

- |                                             |                                                 |
|---------------------------------------------|-------------------------------------------------|
| {1} R <sup>2</sup> = Phenyl                 | {16} R <sup>2</sup> = 4-Chlorophenethyl         |
| {2} R <sup>2</sup> = 3-Iodophenyl           | {17} R <sup>2</sup> = 3-Methoxybenzyl           |
| {3} R <sup>2</sup> = 3-Fluorobenzyl         | {18} R <sup>2</sup> = Cyclohexanemethyl         |
| {4} R <sup>2</sup> = 4-Chlorobenzyl         | {19} R <sup>2</sup> = 2-(Trifluoromethyl)phenyl |
| {5} R <sup>2</sup> = 2-Fluorobenzyl         | {20} R <sup>2</sup> = 3-(Trifluoromethyl)phenyl |
| {6} R <sup>2</sup> = 4-Chlorophenyl         | {21} R <sup>2</sup> = <i>t</i> -Butyl           |
| {7} R <sup>2</sup> = Adamantyl              | {22} R <sup>2</sup> = Methyl                    |
| {8} R <sup>2</sup> = 3-Chlorophenyl         | {23} R <sup>2</sup> = 2-Methoxyphenyl           |
| {9} R <sup>2</sup> = 4-Iodophenyl           | {24} R <sup>2</sup> = 3-Chlorobenzyl            |
| {10} R <sup>2</sup> = 2-Iodophenyl          | {25} R <sup>2</sup> = 3-Bromophenyl             |
| {11} R <sup>2</sup> = 4-Bromophenyl         | {26} R <sup>2</sup> = 2-Chlorophenyl            |
| {12} R <sup>2</sup> = 3-Methylbenzyl        | {27} R <sup>2</sup> = 2-Bromophenyl             |
| {13} R <sup>2</sup> = 2-Methylbenzyl        | {28} R <sup>2</sup> = Furfuryl                  |
| {14} R <sup>2</sup> = 4-Dimethylaminophenyl | {29} R <sup>2</sup> = 2-Fluorobenzyl            |
| {15} R <sup>2</sup> = 4-Methoxybenzyl       |                                                 |

Each reaction tube of a 24-position Bohdan Miniblock XT was flushed with argon, then a solution of the alcohol scaffold **S9** (75 mg) in anhydrous tetrahydrofuran (1.2 mL) was added, followed by sodium hydride (60% in oil, 2 equiv.) and the reactions shaken at 500 rpm for 1 h at room temperature. The appropriate isothiocyanate (2.5 equiv) was then added and the reactions shaken at 500 rpm at room temperature for 18 h, then water (2 mL) and dichloromethane (3 mL) added. The reactions were passed through Isolute hydrophobic phase separator tubes, which allowed the halogenated solvent layer to pass through. The aqueous layers were extracted with dichloromethane (2 x 2 mL). The combined organics were evaporated in a Genevac EZ-2 Plus parallel evaporator and subjected to mass-directed preparative HPLC purification to afford pure thiocarbamates.

| Compound         | Cal. Mass | Found mass | Recovered weight (mg) | Yield (%) | Purity (%) |
|------------------|-----------|------------|-----------------------|-----------|------------|
| <b>S19b</b> {1}  | 316.1740  | 316.1748   | 18.8                  | 20        | 100        |
| <b>S19b</b> {2}  | 442.0706  | 442.0708   | 72.9                  | 55        | 92.9       |
| <b>S19b</b> {3}  | 348.1802  | 348.1783   | 78.4                  | 75        | 100        |
| <b>S19b</b> {4}  | 364.1507  | 364.1507   | 33                    | 35        | 99.1       |
| <b>S19b</b> {6}  | 350.1363  | 350.1416   | 53.3                  | 51        | 98.1       |
| <b>S19b</b> {9}  | 442.0706  | 442.0711   | 92.4                  | 70        | 98.2       |
| <b>S19b</b> {11} | 396.0991  | 396.0827   | 110.9                 | 93        | 98.5       |
| <b>S19b</b> {14} | 361.2308  | 361.2310   | 86.8                  | 80        | 94.4       |
| <b>S19b</b> {16} | 378.1663  | 378.1662   | 34.3                  | 30        | 96.8       |
| <b>S19b</b> {17} | 360.2002  | 360.2003   | 60.8                  | 56        | 99.4       |
| <b>S19b</b> {19} | 384.1614  | 384.1615   | 67                    | 58        | 100        |
| <b>S19b</b> {20} | 384.1614  | 384.1617   | 67.6                  | 59        | 100        |
| <b>S19b</b> {23} | 346.1846  | 346.1850   | 74.6                  | 72        | 99.4       |

|                  |          |          |       |    |      |
|------------------|----------|----------|-------|----|------|
| <b>S19b</b> {24} | 350.1350 | 350.1349 | 84.3  | 80 | 97.8 |
| <b>S19b</b> {26} | 350.1350 | 350.1348 | 73.9  | 70 | 97.4 |
| <b>S19b</b> {27} | 396.0991 | 396.0817 | 87.4  | 74 | 95.7 |
| <b>S19b</b> {28} | 320.1653 | 320.1690 | 23.9  | 25 | 100  |
| <b>S19c</b> {1}  | 350.1583 | 350.1521 | 61.1  | 58 | 100  |
| <b>S19c</b> {4}  | 398.1350 | 398.1356 | 76.4  | 64 | 96.6 |
| <b>S19c</b> {6}  | 384.1194 | 384.1162 | 101.8 | 88 | 100  |
| <b>S19c</b> {8}  | 384.1194 | 384.1139 | 97.5  | 85 | 100  |
| <b>S19c</b> {9}  | 476.0550 | 476.0533 | 114.5 | 80 | 100  |
| <b>S19c</b> {10} | 476.0550 | 476.0496 | 77.8  | 54 | 91   |
| <b>S19c</b> {11} | 428.0688 | 428.0660 | 113.5 | 88 | 100  |
| <b>S19c</b> {12} | 378.1896 | 378.1870 | 61.1  | 54 | 100  |
| <b>S19c</b> {13} | 378.1896 | 378.1869 | 68.3  | 60 | 100  |
| <b>S19c</b> {14} | 393.2005 | 393.1968 | 92.5  | 78 | 98.8 |
| <b>S19c</b> {15} | 394.1845 | 394.1822 | 74.4  | 73 | 100  |
| <b>S19c</b> {17} | 394.1845 | 394.1785 | 78    | 66 | 100  |
| <b>S19c</b> {18} | 370.2209 | 370.2187 | 69    | 72 | 100  |
| <b>S19c</b> {19} | 418.1457 | 418.1417 | 70.7  | 56 | 100  |
| <b>S19c</b> {20} | 418.1457 | 418.1411 | 91.9  | 73 | 89.3 |
| <b>S19c</b> {23} | 380.1689 | 380.1637 | 71.5  | 63 | 100  |
| <b>S19c</b> {24} | 398.1350 | 398.1300 | 89.3  | 75 | 97.1 |
| <b>S19c</b> {25} | 428.0688 | 428.0662 | 55.4  | 43 | 98.7 |
| <b>S19d</b> {3}  | 382.1646 | 382.1640 | 106.5 | 93 | 100  |
| <b>S19d</b> {4}  | 398.1350 | 398.1338 | 114.2 | 96 | 100  |
| <b>S19d</b> {5}  | 382.1646 | 382.1639 | 94.1  | 95 | 85   |
| <b>S19d</b> {14} | 350.1583 | 350.1530 | 77.2  | 73 | 100  |

## Carbamates 35 & 36

A.)

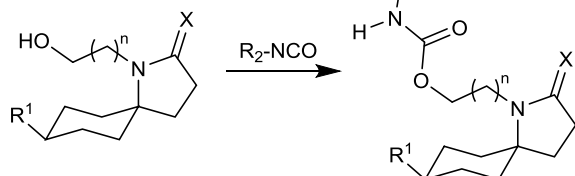

- 8aa** R<sup>1</sup>=H, n=1, X=O  
**8da** R<sup>1</sup>=Ph, n=1, X=O  
**8ea** R<sup>1</sup>=4-MePh, n=1, X=O  
**8fa** R<sup>1</sup>=2-MePh, n=1, X=O  
**8ha** R<sup>1</sup>=4-ClPh, n=1, X=O  
**8ab** R<sup>1</sup>=H, n=2, X=O  
**10ca** R<sup>1</sup>=nPr, n=1, X=H<sub>2</sub>  
**10da** R<sup>1</sup>=Ph, n=1, X=H<sub>2</sub>

**35**

B.)

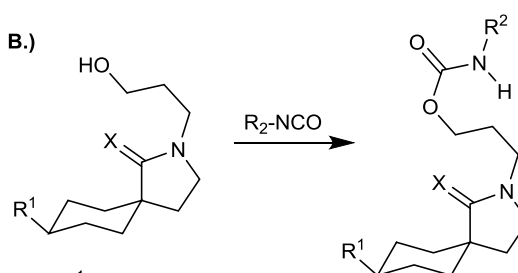

- 9ab** R<sup>1</sup>=H, X=O  
**9bb** R<sup>1</sup>=Me, X=O  
**9db** R<sup>1</sup>=Ph, X=O  
**11db** R<sup>1</sup>=Ph, X=H<sub>2</sub>

**36**

Isocyanates:

- |                                                  |                                                  |
|--------------------------------------------------|--------------------------------------------------|
| {2} R <sup>2</sup> = 4-Bromophenyl               | {19} R <sup>2</sup> = nButyl                     |
| {3} R <sup>2</sup> = 4-Fluorophenyl              | {20} R <sup>2</sup> = 4-Pentylphenyl             |
| {5} R <sup>2</sup> = 2-Methoxyphenyl             | {21} R <sup>2</sup> = Ethyl 4-isocyanatobutyrate |
| {6} R <sup>2</sup> = 4-Methylphenyl              | {22} R <sup>2</sup> = 3-Fluorophenyl             |
| {9} R <sup>2</sup> = 2-Methylphenyl              | {23} R <sup>2</sup> = 4-Ethylphenethyl           |
| {10} R <sup>2</sup> = 3-Chlorophenyl             | {25} R <sup>2</sup> = 2,6-dimethoxyphenyl        |
| {11} R <sup>2</sup> = Phenyl                     | {27} R <sup>2</sup> = Benzyl                     |
| {12} R <sup>2</sup> = 2-(CF <sub>3</sub> )phenyl | {31} R <sup>2</sup> = 3-Cyanophenyl              |
| {14} R <sup>2</sup> = tButyl                     | {32} R <sup>2</sup> = 3,4-Dimethylphenyl         |
| {15} R <sup>2</sup> = 4-Chlorobenzyl             | {33} R <sup>2</sup> = Ethyl                      |
| {16} R <sup>2</sup> = 3,4-Methylenedioxy phenyl  | {34} R <sup>2</sup> = 4-Methoxyphenyl            |
| {18} R <sup>2</sup> = 3-(CF <sub>3</sub> )phenyl | {35} R <sup>2</sup> = 3,5-dichlorophenyl         |

Each reaction tube of a 24-position Bohdan Miniblock XT was flushed with argon, then a solution of the alcohol scaffold **8**, **9**, **10** or **11** (75 mg) in anhydrous tetrahydrofuran (1.2 mL) was added, followed by the appropriate isocyanate (2.5 equiv) and Et<sub>3</sub>N (2.5 equiv). The reactions were shaken at 500 rpm at rt for 12 h, then water (2 mL) and dichloromethane (3 mL) added. The reactions were passed through Isolute hydrophobic phase separator tubes, which allowed the halogenated solvent layer to pass through. The aqueous layers were extracted with dichloromethane (2 x 2 mL). The combined organics were evaporated in a Genevac EZ-2 Plus parallel evaporator and subjected to mass-directed preparative HPLC purification to afford pure carbamates **35** or **36**.

### Results for carbamates **35**:

| R <sup>1</sup> | n | X              | R <sup>2</sup> -N=C=O | Cal. Mass | Found mass | Recovered weight (mg) | Yield (%) | Purity (%) |
|----------------|---|----------------|-----------------------|-----------|------------|-----------------------|-----------|------------|
| H              | 1 | O              | {3}                   | 335.1766  | 335.1775   | 62.8                  | 62        | 78.4       |
| H              | 1 | O              | {27}                  | 331.2016  | 331.2020   | 54.2                  | 55        | 96.3       |
| Ph             | 1 | O              | {2}                   | 471.1278  | 471.1280   | 10.6                  | 7         | 97.5       |
| Ph             | 1 | O              | {3}                   | 411.2079  | 411.2079   | 40.8                  | 33        | 100        |
| Ph             | 1 | O              | {11}                  | 393.2173  | 393.2184   | 48.1                  | 41        | 100        |
| Ph             | 1 | O              | {12}                  | 461.2047  | 461.2048   | 72.4                  | 52        | 100        |
| Ph             | 1 | O              | {15}                  | 441.1940  | 441.1954   | 62.6                  | 47        | 100        |
| Ph             | 1 | O              | {20}                  | 463.2955  | 463.2962   | 72.6                  | 52        | 98.5       |
| Ph             | 1 | O              | {27}                  | 407.2329  | 407.2334   | 36                    | 29        | 100        |
| Ph             | 1 | O              | {31}                  | 418.2125  | 418.2122   | 44.3                  | 35        | 100        |
| 4-Me-Ph        | 1 | O              | {2}                   | 485.1435  | 485.1433   | 40.8                  | 28        | 100        |
| 4-Me-Ph        | 1 | O              | {3}                   | 425.2235  | 425.2271   | 44.3                  | 35        | 100        |
| 4-Me-Ph        | 1 | O              | {31}                  | 432.2282  | 432.2281   | 36                    | 28        | 100        |
| 2-Me-Ph        | 1 | O              | {2}                   | 485.1435  | 485.1438   | 48.1                  | 33        | 100        |
| 2-Me-Ph        | 1 | O              | {3}                   | 425.2235  | 425.2245   | 42.9                  | 34        | 100        |
| 2-Me-Ph        | 1 | O              | {31}                  | 432.2282  | 432.2301   | 46.9                  | 36        | 100        |
| 4-Cl-Ph        | 1 | O              | {2}                   | 427.1783  | 427.1767   | 92.6                  | 72        | 100        |
| 4-Cl-Ph        | 1 | O              | {3}                   | 445.1689  | 445.1688   | 19.2                  | 14        | 100        |
| 4-Cl-Ph        | 1 | O              | {11}                  | 475.2203  | 475.2203   | 12.6                  | 9         | 100        |
| 4-Cl-Ph        | 1 | O              | {27}                  | 308.1412  | 308.1400   | 32.9                  | 36        | 100        |
| 4-Cl-Ph        | 1 | O              | {31}                  | 452.1736  | 452.1724   | 13.4                  | 10        | 100        |
| 4-Cl-Ph        | 1 | O              | {33}                  | 379.1783  | 379.1771   | 31.8                  | 28        | 100        |
| H              | 2 | O              | {3}                   | 349.1922  | 349.1911   | 51                    | 49        | 88.3       |
| H              | 2 | O              | {27}                  | 345.2173  | 345.2166   | 32.5                  | 31        | 100        |
| nPr            | 1 | H <sub>2</sub> | {2}                   | 423.1641  | 423.1665   | 54.8                  | 43        | 94.4       |
| nPr            | 1 | H <sub>2</sub> | {3}                   | 363.2442  | 363.2459   | 49.2                  | 45        | 100        |
| nPr            | 1 | H <sub>2</sub> | {5}                   | 375.2642  | 375.2664   | 17.1                  | 15        | 100        |
| nPr            | 1 | H <sub>2</sub> | {9}                   | 359.2693  | 359.2737   | 44.4                  | 41        | 100        |
| nPr            | 1 | H <sub>2</sub> | {10}                  | 379.2147  | 379.2171   | 63.8                  | 56        | 100        |
| nPr            | 1 | H <sub>2</sub> | {11}                  | 345.2536  | 345.2582   | 50.2                  | 48        | 100        |
| nPr            | 1 | H <sub>2</sub> | {27}                  | 359.2693  | 359.2723   | 48.7                  | 45        | 97.5       |
| nPr            | 1 | H <sub>2</sub> | {36}                  | 375.2642  | 375.2639   | 35.7                  | 32        | 100        |
| Ph             | 1 | H <sub>2</sub> | {2}                   | 457.1485  | 457.1491   | 32.7                  | 24        | 100        |
| Ph             | 1 | H <sub>2</sub> | {3}                   | 397.2286  | 397.2327   | 32.7                  | 27        | 100        |
| Ph             | 1 | H <sub>2</sub> | {5}                   | 409.2485  | 409.2548   | 29.1                  | 24        | 100        |
| Ph             | 1 | H <sub>2</sub> | {9}                   | 393.2536  | 393.2570   | 23.6                  | 20        | 100        |
| Ph             | 1 | H <sub>2</sub> | {10}                  | 413.1990  | 413.2032   | 28.4                  | 23        | 100        |
| Ph             | 1 | H <sub>2</sub> | {11}                  | 379.2380  | 379.2429   | 22.5                  | 20        | 100        |
| Ph             | 1 | H <sub>2</sub> | {22}                  | 397.2286  | 397.2330   | 19.4                  | 16        | 100        |
| Ph             | 1 | H <sub>2</sub> | {25}                  | 439.2591  | 439.2663   | 19.5                  | 15        | 100        |
| Ph             | 1 | H <sub>2</sub> | {35}                  | 447.1600  | 447.1634   | 22.7                  | 17        | 98.9       |
| Ph             | 1 | H <sub>2</sub> | {36}                  | 409.2485  | 409.2499   | 39.9                  | 32        | 100        |



## Results for carbamates 36:

| R <sup>1</sup> | n | X              | R <sup>2</sup> -N=C=O | Cal. Mass | Found mass | Recovered weight (mg) | Yield (%) | Purity (%) |
|----------------|---|----------------|-----------------------|-----------|------------|-----------------------|-----------|------------|
| H              | 2 | O              | {2}                   | 409.1122  | 409.0811   | 64.6                  | 53        | 97.2       |
| H              | 2 | O              | {3}                   | 349.1922  | 349.1912   | 73.2                  | 70        | 16.1       |
| H              | 2 | O              | {19}                  | 311.2329  | 311.2306   | 35.8                  | 38        | 74.5       |
| H              | 2 | O              | {31}                  | 356.1969  | 356.1710   | 68.2                  | 64        | 99.4       |
| Me             | 2 | O              | {5}                   | 375.2279  | 375.2251   | 62.9                  | 56        | 99.4       |
| Me             | 2 | O              | {15}                  | 393.1940  | 393.1906   | 76.8                  | 65        | 100        |
| Me             | 2 | O              | {16}                  | 389.2071  | 389.2039   | 68.8                  | 59        | 100        |
| Me             | 2 | O              | {18}                  | 413.2047  | 413.2022   | 53.1                  | 43        | 100        |
| Me             | 2 | O              | {21}                  | 383.2541  | 383.2523   | 67.6                  | 59        | 70.3       |
| Me             | 2 | O              | {22}                  | 363.2079  | 363.2050   | 74.3                  | 68        | 97         |
| Me             | 2 | O              | {23}                  | 401.2799  | 401.2781   | 61.3                  | 51        | 96.3       |
| Ph             | 2 | O              | {8}                   | 475.2203  | 475.2180   | 68.1                  | 48        | 100        |
| Ph             | 2 | O              | {19}                  | 387.2642  | 387.2617   | 24.3                  | 21        | 100        |
| Ph             | 2 | O              | {21}                  | 445.2697  | 445.2678   | 57.5                  | 43        | 100        |
| Ph             | 2 | O              | {23}                  | 463.2955  | 463.2936   | 23.2                  | 17        | 100        |
| Ph             | 2 | H <sub>2</sub> | {3}                   | 411.2443  | 411.2440   | 115.4                 | 94        | 100        |
| Ph             | 2 | H <sub>2</sub> | {19}                  | 373.2850  | 373.2849   | 101.7                 | 91        | 99.1       |

## Thiocarbamates 37

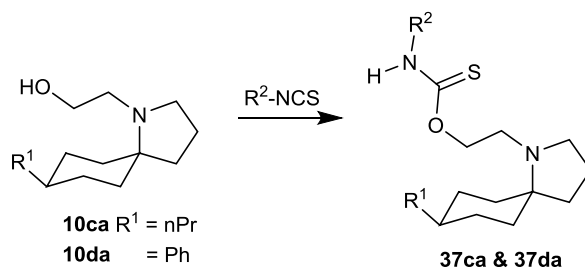

Isothiocyanate:

- {1} R<sup>2</sup>= Phenyl
- {6} R<sup>2</sup>= 4-Chlorophenyl
- {8} R<sup>2</sup>= 3-Chlorophenyl
- {11} R<sup>2</sup>= 4-Bromophenyl
- {12} R<sup>2</sup>= 3-Methylbenzyl
- {14} R<sup>2</sup>= 4-Dimethylaminophenyl
- {19} R<sup>2</sup>= 2-(Trifluoromethyl)phenyl
- {23} R<sup>2</sup>= 2-Methoxyphenyl
- {26} R<sup>2</sup>= 2-Chlorophenyl
- {27} R<sup>2</sup>= 2-Bromophenyl

Each reaction tube of a 24-position Bohdan Miniblock XT was flushed with argon, then a solution of the alcohol scaffold **8**, or **10** (75 mg) in anhydrous tetrahydrofuran (1.2 mL) was added, followed by sodium hydride (60% in oil, 2 equiv.) and the reactions shaken at 500 rpm for 1 h at room temperature. The appropriate isothiocyanate (2 equiv) was then added and the reactions were shaken at 500 rpm at room temperature for 12 h, then water (2 mL) and dichloromethane (3 mL) added. The reactions were passed through Isolute hydrophobic phase separator tubes, which allowed the halogenated solvent layer to pass through. The aqueous layers were extracted with dichloromethane (2 x 2 mL). The combined organics were evaporated in a Genevac EZ-2 Plus parallel evaporator and subjected to mass-directed preparative HPLC purification to afford pure carbamates **37**.

| Compound | Cal. Mass | Found mass | Recovered weight (mg) | Yield (%) | Purity (%) |
|----------|-----------|------------|-----------------------|-----------|------------|
| 37ca{1}  | 361.2308  | 361.2334   | 61.8                  | 57        | 100        |
| 37ca{8}  | 395.1918  | 395.1958   | 55.5                  | 47        | 91.3       |
| 37ca{12} | 389.2621  | 389.2677   | 30.7                  | 26        | 100        |
| 37ca{23} | 391.2413  | 391.2449   | 44.8                  | 38        | 100        |
| 37ca{26} | 395.1918  | 395.1939   | 54.3                  | 46        | 95.5       |
| 37ca{27} | 439.1413  | 439.1447   | 40.7                  | 31        | 98.5       |
| 37da{1}  | 395.2151  | 395.2214   | 18.1                  | 15        | 100        |
| 37da{6}  | 429.1762  | 429.1815   | 42.7                  | 33        | 12.7       |
| 37da{8}  | 429.1762  | 429.1774   | 25.5                  | 20        | 100        |
| 37da{11} | 473.1256  | 473.1281   | 43                    | 30        | 100        |
| 37da{12} | 423.2464  | 423.2523   | 23.3                  | 18        | 100        |
| 37da{14} | 438.2573  | 438.2610   | 22.1                  | 17        | 65.1       |
| 37da{19} | 463.2025  | 463.2084   | 21.3                  | 15        | 100        |
| 37da{23} | 425.2257  | 425.2251   | 19.9                  | 16        | 100        |
| 37da{26} | 429.1762  | 429.1796   | 20.7                  | 16        | 100        |
| 37da{27} | 473.1256  | 473.1265   | 22.7                  | 16        | 100        |

### Characterization data for representative library compounds

#### Carbamate 34a{6}

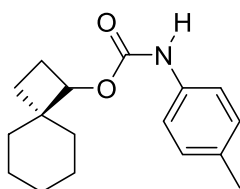

$^1\text{H}$  NMR (500 MHz, DMSO)  $\delta$  9.48 (s, 1H), 7.34 (d,  $J$  = 7.8 Hz, 2H), 7.06 (d,  $J$  = 8.2 Hz, 2H), 4.67 (t,  $J$  = 7.9 Hz, 1H), 2.28 – 2.14 (m, 4H), 2.06 – 1.84 (m, 1H), 1.71 – 1.60 (m, 2H), 1.60 – 1.51 (m, 2H), 1.51 – 1.42 (m, 3H), 1.40 (d,  $J$  = 12.8 Hz, 1H), 1.37 – 1.29 (m, 2H), 1.26 – 1.08 (m, 2H);  $^{13}\text{C}$  NMR (126 MHz, DMSO)  $\delta$  153.2, 136.7, 131.1, 129.1, 118.1, 74.5, 45.4, 40.4, 37.4, 29.7, 25.7, 24.7, 23.8, 22.5, 21.7, 20.3;  $m/z$  (ESI+) found  $[\text{M}+\text{H}]^+$  274.1814.  $\text{C}_{17}\text{H}_{24}\text{NO}_2^+$  requires 274.1798.

#### Carbamate 34d{17}

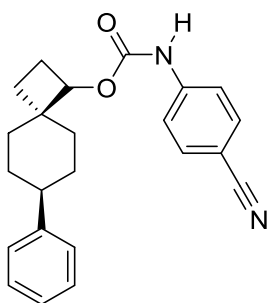

$^1\text{H}$  NMR (500 MHz, DMSO)  $\delta$  10.14 (s, 1H), 7.96 (s, 1H), 7.78 (d,  $J$  = 8.2 Hz, 1H), 7.53 (t,  $J$  = 7.9 Hz, 1H), 7.50 – 7.45 (m, 1H), 7.16 – 6.98 (m, 5H), 5.01 (t,  $J$  = 7.7 Hz, 1H), 2.48 – 2.38 (m, 1H), 2.35 – 2.20 (m,

2H), 2.12 – 1.98 (m, 1H), 1.87 – 1.77 (m, 1H), 1.77 – 1.62 (m, 2H), 1.60 – 1.48 (m, 3H), 1.48 – 1.32 (m, 3H). <sup>13</sup>C NMR (126 MHz, DMSO) δ 153.0, 147.2, 140.1, 130.3, 128.0, 126.5, 126.0, 125.7, 118.7, 111.6, 74.5, 44.3, 42.4, 37.6, 31.8, 31.3, 29.7, 26.7, 23.8; *m/z* (ESI+) found [M+H]<sup>+</sup> 378.2201. C<sub>23</sub>H<sub>25</sub>N<sub>2</sub>O<sub>2</sub><sup>+</sup> requires 361.1907.

Carbamate **36db**{21}

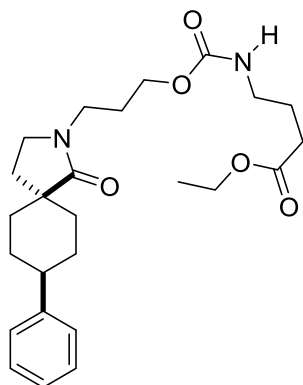

<sup>1</sup>H NMR (500 MHz, DMSO) δ 7.30 – 7.25 (m, 2H), 7.25 – 7.19 (m, 2H), 7.19 – 7.12 (m, 2H), 4.03 (q, *J* = 7.1 Hz, 2H), 3.90 (t, *J* = 6.5 Hz, 2H), 3.27 (t, *J* = 6.8 Hz, 2H), 3.22 (t, *J* = 7.0 Hz, 2H), 2.98 (dd, *J* = 12.8, 6.6 Hz, 2H), 2.54-2.51 (m, 1H), 2.27 (t, *J* = 7.4 Hz, 2H), 2.18 (qd, *J* = 12.6, 3.4 Hz, 2H), 1.83 (d, *J* = 13.7 Hz, 2H), 1.77 (dd, *J* = 12.4, 5.6 Hz, 2H), 1.72 (dd, *J* = 13.6, 6.8 Hz, 2H), 1.67 – 1.60 (m, 2H), 1.60 – 1.53 (m, 2H), 1.41 (td, *J* = 13.2, 3.8 Hz, 2H), 1.16 (dd, *J* = 9.5, 4.8 Hz, 3H); <sup>13</sup>C NMR (126 MHz, DMSO) δ 177.5, 172.6, 156.2, 147.2, 128.3, 126.7, 125.8, 61.5, 59.8, 42.9, 42.4, 41.3, 38.7, 34.5, 33.9, 30.8, 29.0, 26.7, 24.8, 14.1; *m/z* (ESI+) found [M+H]<sup>+</sup> 445.2678. C<sub>25</sub>H<sub>37</sub>N<sub>2</sub>O<sub>5</sub><sup>+</sup> requires 445.2694.

Carbamate **36db**{18}

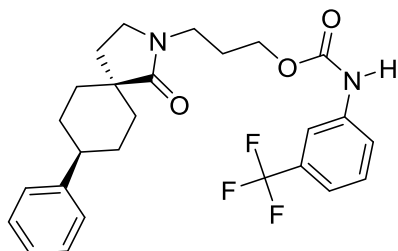

<sup>1</sup>H NMR (500 MHz, DMSO) δ 9.05 (s, 1H), 7.74 – 7.69 (m, 1H), 7.65 (t, *J* = 7.7 Hz, 1H), 7.53 (d, *J* = 7.9 Hz, 1H), 7.44 (t, *J* = 7.6 Hz, 1H), 7.31 – 7.25 (m, 2H), 7.25 – 7.20 (m, 2H), 7.19 – 7.12 (m, 1H), 4.02 (t, *J* = 6.5 Hz, 2H), 3.31 – 3.20 (m, 4H), 2.54-2.51 (m, 1H), 2.29 – 2.13 (m, 2H), 1.90 – 1.81 (m, 2H), 1.81 – 1.73 (m, 4H), 1.64 – 1.52 (m, 2H), 1.48 – 1.34 (m, 2H); <sup>13</sup>C NMR (126 MHz, DMSO) δ 177.6, 154.8, 147.2, 135.6, 133.1, 130.0, 128.3, 126.8, 126.6, 126.3 (q, *J* = 5 Hz), 125.8, 125.1 (q, *J* = 29 Hz), 123.6 (q, *J* = 272 Hz), 62.3, 42.9, 42.4, 41.3, 38.5, 34.6, 33.9, 29.0, 26.4; *m/z* (ESI+) found [M+H]<sup>+</sup> 475.2180. C<sub>26</sub>H<sub>30</sub>F<sub>3</sub>N<sub>2</sub>O<sub>3</sub><sup>+</sup> requires 475.2200.

Carbamate **36bb**{16}

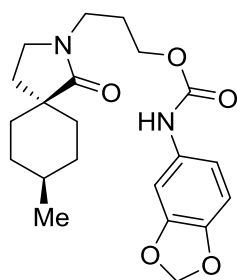

$^1\text{H}$  NMR (500 MHz, DMSO)  $\delta$  9.51 (s, 1H), 7.12 (s, 1H), 6.85 (d,  $J$  = 8.3 Hz, 1H), 6.81 (d,  $J$  = 8.4 Hz, 1H), 5.95 (s, 2H), 4.00 (t,  $J$  = 6.5 Hz, 2H), 3.30 – 3.18 (m, 4H), 1.83 – 1.73 (m, 4H), 1.73 – 1.66 (m, 2H), 1.56 – 1.48 (m, 3H), 1.48 – 1.39 (m, 2H), 1.25 – 1.14 (m, 2H), 0.90 (d,  $J$  = 5.7 Hz, 3H).;  $^{13}\text{C}$  NMR (126 MHz, DMSO)  $\delta$  177.8, 153.6, 147.2, 142.3, 133.6, 110.9, 108.1, 100.9, 100.5, 61.9, 43.0, 42.4, 38.7, 32.6, 31.1, 29.5, 29.0, 26.5, 20.3;  $m/z$  (ESI+) found  $[\text{M}+\text{H}]^+$  389.2039.  $\text{C}_{21}\text{H}_{29}\text{N}_2\text{O}_5^+$  requires 389.2068.

#### Carbamate **36db**{12}

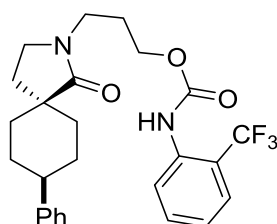

$^1\text{H}$  NMR (500 MHz, DMSO)  $\delta$  9.07 (s, 1H), 7.75 – 7.70 (m, 1H), 7.67 (t,  $J$  = 7.7 Hz, 1H), 7.53 (d,  $J$  = 7.9 Hz, 1H), 7.44 (t,  $J$  = 7.7 Hz, 1H), 7.27 (ddd,  $J$  = 15.1, 8.0, 4.1 Hz, 4H), 7.20 – 7.14 (m, 1H), 4.02 (t,  $J$  = 6.5 Hz, 2H), 3.28 (dd,  $J$  = 12.0, 6.7 Hz, 4H), 2.53-2.48 (m, 1H), 1.96 (t,  $J$  = 6.9 Hz, 2H), 1.80 (p,  $J$  = 6.7 Hz, 2H), 1.73 (d,  $J$  = 10.9 Hz, 2H), 1.69 – 1.57 (m, 2H), 1.52 (dt,  $J$  = 27.3, 8.8 Hz, 4H);  $^{13}\text{C}$  NMR (126 MHz, DMSO)  $\delta$  177.9, 154.8, 147.0, 135.6, 133.1, 130.0, 128.3, 126.7, 126.6, 126.3 (q,  $J$  = 5 Hz), 125.9, 125.1 (q,  $J$  = 29 Hz), 123.6 (q,  $J$  = 272 Hz), 62.4, 44.0, 43.2, 42.9, 38.8, 32.3, 29.6, 28.6, 26.5;  $m/z$  (ESI+) found  $[\text{M}+\text{H}]^+$  475.2180.  $\text{C}_{26}\text{H}_{30}\text{F}_3\text{N}_2\text{O}_3^+$  requires 475.2203.

#### Carbamate **36bb**{15}

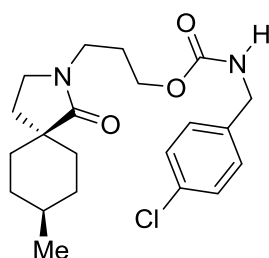

$^1\text{H}$  NMR (500 MHz, DMSO)  $\delta$  7.71 (t,  $J$  = 6.1 Hz, 1H), 7.44 – 7.33 (m, 2H), 7.27 (d,  $J$  = 8.4 Hz, 2H), 4.16 (d,  $J$  = 6.2 Hz, 2H), 3.91 (t,  $J$  = 6.5 Hz, 2H), 3.23 (d,  $J$  = 7.3 Hz, 2H), 3.20 (d,  $J$  = 7.3 Hz, 2H), 1.85 – 1.62 (m, 6H), 1.59 – 1.49 (m, 3H), 1.49 – 1.37 (m, 2H), 1.27 – 1.09 (m, 2H), 0.90 (d,  $J$  = 5.8 Hz, 3H);  $^{13}\text{C}$



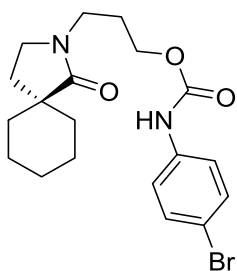

$^1\text{H}$  NMR (500 MHz, DMSO)  $\delta$  9.80 (s, 1H), 7.49 – 7.35 (m, 4H), 4.02 (t,  $J$  = 6.5 Hz, 2H), 3.26 (q,  $J$  = 6.8 Hz, 4H), 1.84 (dd,  $J$  = 12.2, 5.3 Hz, 2H), 1.79 (dd,  $J$  = 13.6, 6.8 Hz, 2H), 1.66 – 1.52 (m, 3H), 1.48 – 1.38 (m, 2H), 1.36 – 1.23 (m, 4H), 1.23 – 1.10 (m, 1H);  $^{13}\text{C}$  NMR (126 MHz, DMSO)  $\delta$  177.9, 153.4, 138.6, 131.5, 120.0, 113.8, 62.1, 44.2, 43.1, 38.8, 32.1, 29.0, 26.3, 25.2, 21.8;  $m/z$  (ESI+) found  $[\text{M}+\text{H}]^+$  409.0811.  $\text{C}_{19}\text{H}_{26}\text{BrN}_2\text{O}_3^+$  requires 409.1118.

Carbamate **36ab**{31}

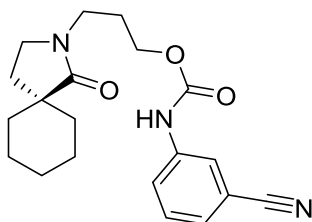

$^1\text{H}$  NMR (500 MHz, DMSO)  $\delta$  10.05 (s, 1H), 7.88 (s, 1H), 7.76 – 7.67 (m, 1H), 7.49 (t,  $J$  = 7.9, 7.9 Hz, 1H), 7.44 (dt,  $J$  = 7.6, 1.3, 1.3 Hz, 1H), 4.05 (t,  $J$  = 6.5, 6.5 Hz, 2H), 3.32 – 3.21 (m, 4H), 1.91 – 1.74 (m, 4H), 1.67 – 1.52 (m, 3H), 1.49 – 1.36 (m, 2H), 1.37 – 1.23 (m, 4H), 1.23 – 1.09 (m, 1H);  $^{13}\text{C}$  NMR (126 MHz, DMSO)  $\delta$  177.9, 153.4, 140.1, 130.2, 125.8, 122.7, 120.5, 118.7, 111.5, 62.4, 44.2, 43.0, 38.7, 32.1, 29.0, 26.2, 25.2, 21.8;  $m/z$  (ESI+) found  $[\text{M}+\text{H}]^+$  356.1710.  $\text{C}_{20}\text{H}_{26}\text{N}_3\text{O}_3^+$  requires 356.1965.

## C. Sparteine-inspired libraries

### General procedures for library preparation and tabulated results.

#### Carbamates **40**

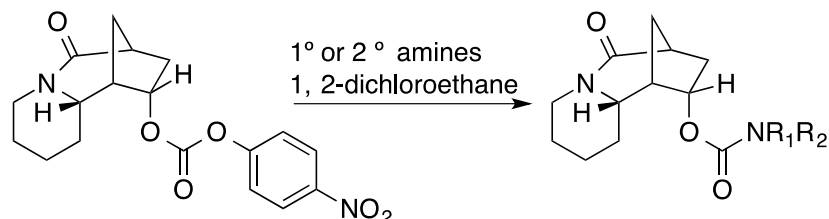

Amine:

- |                          |                                              |
|--------------------------|----------------------------------------------|
| {1} 4-fluorobenzyl       | {13} 2-hydroxyethyl                          |
| {2} 4-methoxybenzyl      | {14} 3- <i>N,N</i> -dimethylaminopropyl      |
| {3} morpholine           | {15} pyridin-3-yl-methyl                     |
| {4} <i>n</i> -butyl      | {16} 2-(1 <i>H</i> -indol-3-yl)ethan-1-amine |
| {5} cyclohexyl           | {17} piperidine                              |
| {6} benzyl               | {18} 4-phenyl piperidine                     |
| {7} 4-bromobenzyl        | {19} 1-methyl-piperazine                     |
| {8} 4-methylbenzyl       | {20} 1-phenyl-piperazine                     |
| {9} 3, 5-dimethoxybenzyl | {21} 1-(phenylsulfonyl)piperazine            |
| {10} methyl              | {22} phenyl(piperazine-1-yl)methanone        |
| {11} <i>n</i> -propyl    | {23} 1-(piperazin-1-yl)ethan-1-one           |
| {12} isopropyl           | {24} piperazin-1-yl(thiophen-3-yl)methanone  |

To each reaction tube of a 24-position Bohdan MiniBlock XT was added a solution of carbonate **39** (70 mg, 0.19 mmol) in 1, 2-dichloroethane (2 mL), followed by the appropriate amine (1.26 mmol). The reactions were shaken at 450 rpm for 4 h at 50 °C, then 20% aqueous HCl (3 mL) was added to each tube. The reactions were shaken for 15 additional minutes then passed through hydrophobic phase separator tubes, which allowed the halogenated solvent layer to pass through. The aqueous layers were extracted with dichloromethane (2 x 2 mL). The combined organics were evaporated in a Genevac EZ-2 Plus parallel evaporator and subjected to mass-directed preparative HPLC purification to afford pure carbamates **40**.

| Compound      | Cal. mass | Found mass | Recovered weight (mg) | Yield (%) | Purity (%) |
|---------------|-----------|------------|-----------------------|-----------|------------|
| <b>40{1}</b>  | 347.1766  | 347.1798   | 48.5                  | 73.7      | 100.0      |
| <b>40{2}</b>  | 359.1966  | 359.2099   | 54.2                  | 79.6      | 100.0      |
| <b>40{3}</b>  | 309.1809  | 309.2050   | 51.2                  | 87.4      | 100.0      |
| <b>40{4}</b>  | 295.2016  | 295.2288   | 44.8                  | 80.1      | 100.0      |
| <b>40{5}</b>  | 321.2173  | 321.2421   | 43.0                  | 70.7      | 100.0      |
| <b>40{6}</b>  | 329.1860  | 329.1831   | 48.7                  | 78.1      | 100.0      |
| <b>40{7}</b>  | 407.0965  | 407.0986   | 27.9                  | 36.2      | 99.4       |
| <b>40{8}</b>  | 343.2016  | 343.1972   | 31.0                  | 47.7      | 98.8       |
| <b>40{9}</b>  | 389.2071  | 389.2049   | 48.2                  | 65.3      | 96.1       |
| <b>40{10}</b> | 253.1547  | 253.1495   | 28.1                  | 58.7      | 100.0      |
| <b>40{11}</b> | 281.1860  | 281.1848   | 45.6                  | 85.7      | 99.5       |
| <b>40{12}</b> | 281.1860  | 281.1858   | 40.0                  | 75.1      | 93.0       |
| <b>40{13}</b> | 283.1653  | 283.1595   | 29.1                  | 54.3      | 99.4       |
| <b>40{14}</b> | 324.2282  | 324.2248   | 50.5                  | 82.2      | 99.2       |
| <b>40{15}</b> | 330.1812  | 330.1796   | 49.3                  | 78.8      | 100.0      |
| <b>40{16}</b> | 382.2125  | 382.2110   | 20.1                  | 27.8      | 98.4       |
| <b>40{17}</b> | 307.2016  | 307.1973   | 35.0                  | 60.2      | 99.0       |

|               |          |          |      |      |       |
|---------------|----------|----------|------|------|-------|
| <b>40{18}</b> | 383.2329 | 383.2296 | 39.5 | 54.4 | 98.4  |
| <b>40{19}</b> | 322.2125 | 322.2086 | 38.1 | 62.4 | 100.0 |
| <b>40{20}</b> | 384.2282 | 384.2287 | 36.1 | 49.6 | 95.5  |
| <b>40{21}</b> | 448.1901 | 448.1935 | 69.4 | 81.7 | 96.3  |
| <b>40{22}</b> | 412.2231 | 412.2260 | 77.3 | 98.9 | 91.5  |
| <b>40{23}</b> | 350.2075 | 350.2017 | 35.7 | 53.8 | 98.5  |
| <b>40{24}</b> | 418.1795 | 418.1779 | 36.3 | 45.8 | 84.5  |

## Carbamates 42

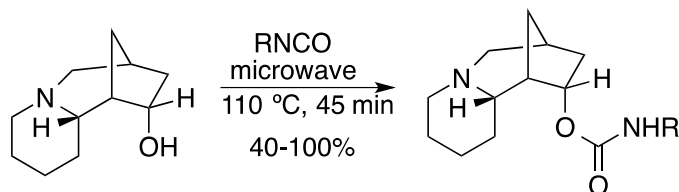

Isocyanate:

- |                               |                                           |
|-------------------------------|-------------------------------------------|
| {1} 3,5-dimethylphenyl        | {13} 2-methoxy phenyl                     |
| {2} 3,4-dimethylphenyl        | {14} 3-methyl phenyl                      |
| {3} 4-methoxybenzyl           | {15} 4-bromo phenyl                       |
| {4} 2-thiophen                | {16} 3-bromo phenyl                       |
| {5} 4-fluorophenyl            | {17} 4-cyanophenyl                        |
| {6} 2-indolyl                 | {18} 4-( <i>N,N</i> -dimethylamino)phenyl |
| {7} 3-phenylpropyl            | {19} benzyl                               |
| {8} 3-cyanophenyl             | {20} 2-(4'-ethylphenyl)ethyl              |
| {9} ethyl-4-butanoate         | {21} cyclohexyl                           |
| {10} 4-methylphenyl           | {22} <i>n</i> -butyl                      |
| {11} 4-trifluoromethyl phenyl | {23} <i>tert</i> -butyl                   |
| {12} 2-trifluoromethyl phenyl | {24} 4- <i>n</i> -pentylphenyl            |

To each pyrex glass vial placed on a 24 position block was added a solution of alcohol **41** (40 mg, 0.22 mmol) in acetonitrile (1 mL), followed by the appropriate isocyanate (0.66 mmol). The vials were irradiated in a microwave at 110 °C for 1 h and then the contents of each vial were transferred to a phase separator fitted on a 24 position Mini Block. Dichloromethane (3 mL) and saturated aqueous sodium bicarbonate solution (3 mL) were added to each tube. The reactions were shaken for 15 minutes, then passed through hydrophobic phase separator tubes, which allowed the halogenated solvent layer to pass through. The aqueous layers were extracted with dichloromethane (2 x 2 mL). The combined organics were evaporated in a Genevac EZ-2 Plus parallel evaporator and subjected to mass-directed preparative HPLC purification to afford pure carbamates **42**.

| Compound      | Cal. Mass | Found mass | Recovered | Yield(%) | Purity(%) |
|---------------|-----------|------------|-----------|----------|-----------|
| <b>42{1}</b>  | 329.2224  | 329.2217   | 28.7      | 39.7     | 87.5      |
| <b>42{2}</b>  | 329.2224  | 329.2185   | 59.1      | 81.8     | 99.0      |
| <b>42{3}</b>  | 345.2173  | 345.2169   | 57.9      | 76.5     | 91.2      |
| <b>42{4}</b>  | 307.1475  | 307.1428   | 58.4      | 86.7     | 97.3      |
| <b>42{5}</b>  | 319.1817  | 319.1777   | 10.6      | 15.1     | 99.9      |
| <b>42{6}</b>  | 340.2020  | 340.1991   | 62.0      | 83.1     | 41.7      |
| <b>42{7}</b>  | 343.2380  | 343.2325   | 59.8      | 79.4     | 98.1      |
| <b>42{8}</b>  | 326.1863  | 326.1801   | 70.1      | 97.9     | 100.0     |
| <b>42{9}</b>  | 339.2279  | 339.2277   | 39.7      | 53.4     | 95.5      |
| <b>42{10}</b> | 315.2067  | 315.2030   | 53.1      | 76.8     | 95.8      |
| <b>42{11}</b> | 369.1785  | 369.1769   | 74.2      | 91.6     | 90.4      |



|               |          |          |      |      |       |
|---------------|----------|----------|------|------|-------|
| <b>42{12}</b> | 369.1785 | 369.1769 | 29.0 | 35.8 | 90.1  |
| <b>42{13}</b> | 331.2016 | 331.1999 | 57.8 | 69.5 | 99.6  |
| <b>42{14}</b> | 315.2067 | 315.2012 | 50.2 | 72.6 | 98.5  |
| <b>42{15}</b> | 379.1016 | 379.0995 | 57.2 | 68.8 | 99.2  |
| <b>42{16}</b> | 379.1016 | 379.1003 | 29.0 | 34.9 | 99.4  |
| <b>42{17}</b> | 326.1863 | 326.1805 | 70.9 | 99.1 | 98.2  |
| <b>42{18}</b> | 344.2333 | 344.2319 | 47.0 | 62.2 | 29.8  |
| <b>42{19}</b> | 315.2067 | 315.2043 | 58.6 | 84.8 | 97.4  |
| <b>42{20}</b> | 357.2537 | 357.2539 | 49.2 | 62.8 | 91.9  |
| <b>42{21}</b> | 307.2380 | 307.2286 | 40.7 | 60.4 | 92.4  |
| <b>42{22}</b> | 281.2224 | 281.2201 | 54.8 | 88.9 | 100.0 |
| <b>42{23}</b> | 281.2224 |          |      | 0.0  |       |
| <b>42{24}</b> | 371.2693 | 371.2697 | 13.5 | 16.6 | 82.7  |
| <b>42{25}</b> | 319.1817 | 319.1796 | 55.0 | 78.6 | 96.8  |

### Carbamates 43a

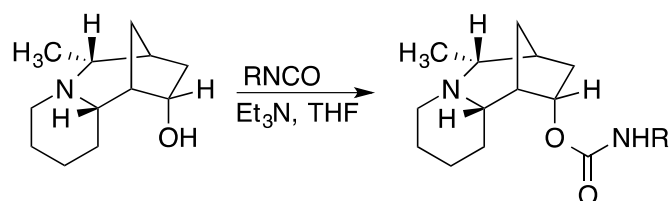

Isocyanate:

|                              |                                  |
|------------------------------|----------------------------------|
| {1} ethyl-4-butanoate        | {13} 3-chlorophenyl              |
| {2} 4-chloro benzyl          | {14} 4-chloro phenyl             |
| {3} 3-phenyl propyl          | {15} 2-trifluoromethyl phenyl    |
| {4} 2-(4'-ethylphenyl)-ethyl | {16} 3,4-(methylenedioxy) phenyl |
| {5} 4-methyl phenyl          | {17} 3-trifluoromethyl phenyl    |
| {6} 4-cyano phenyl           | {18} 4-trifluoromethyl phenyl    |
| {7} 3,5-dimethyl phenyl      | {19} tert-butyl                  |
| {8} 2-methoxy phenyl         | {20} benzyl                      |
| {9} 3-fluoro phenyl          | {21} 4-bromo phenyl              |
| {10} 4-fluoro phenyl         | {22} 3-cyano phenyl              |
| {11} 4-n-pentyl phenyl       | {23} 4-methoxy benzyl            |
| {12} 2-chloro phenyl         | {24} 2-indolyl                   |

To each reaction tube of a 24-position Bohdan MiniBlock XT was added a solution of alcohol **16a** (37 mg, 0.19 mmol) in THF (2 mL), followed by the appropriate isocyanate (0.57 mmol). The reactions were shaken at 450 rpm for 7 h at 50 °C. Saturated aqueous NaHCO<sub>3</sub> (2 mL) and dichloromethane (4 mL) were added to each tube and the reactions shaken for 15 min then passed through Isolute hydrophobic phase separator tubes, which allowed the organic solvent layer to pass through. The aqueous layers were extracted with dichloromethane (2 x 2 mL). The combined organics were evaporated in a Genevac EZ-2 Plus parallel evaporator and subjected to mass-directed preparative HPLC purification to afford pure carbamates **43a**.

| Compound      | Cal. Mass | Found mass | Recovered | Yield(%) | Purity(%) |
|---------------|-----------|------------|-----------|----------|-----------|
| <b>43a{1}</b> | 353.2435  | 353.2427   | 32.0      | 47.8     | 96.6      |
| <b>43a{2}</b> | 363.1834  | 363.1796   | 38.6      | 56.1     | 99.6      |
| <b>43a{3}</b> | 357.2537  | 357.2525   | 41.7      | 61.6     | 97.6      |
| <b>43a{4}</b> | 371.2693  | 371.2697   | 39.3      | 55.9     | 95.1      |
| <b>43a{5}</b> | 329.2224  | 329.2212   | 30.9      | 49.6     | 98.4      |

|                |          |          |      |      |      |
|----------------|----------|----------|------|------|------|
| <b>43a{6}</b>  | 340.2020 | 340.1962 | 40.0 | 62.1 | 99.8 |
| <b>43a{7}</b>  | 343.2380 | 343.2353 | 29.0 | 44.6 | 85.5 |
| <b>43a{8}</b>  | 345.2173 | 345.2177 | 39.2 | 59.9 | 98.4 |
| <b>43a{9}</b>  | 333.1973 | 333.1945 | 36.9 | 58.5 | 99.7 |
| <b>43a{10}</b> | 333.1973 | 333.1987 | 36.0 | 57.0 | 99.3 |
| <b>43a{11}</b> | 385.2850 | 385.2857 | 28.9 | 39.6 | 57.3 |
| <b>43a{12}</b> | 349.1678 | 349.1665 | 30.4 | 46.0 | 57.5 |
| <b>43a{13}</b> | 349.1678 | 349.1696 | 29.9 | 45.2 | 99.8 |
| <b>43a{14}</b> | 349.1678 | 349.1679 | 11.5 | 17.4 | 87.1 |
| <b>43a{15}</b> | 383.1941 | 383.1960 | 37.0 | 51.0 | 91.6 |
| <b>43a{16}</b> | 359.1966 | 359.1944 | 41.7 | 61.3 | 97.1 |
| <b>43a{17}</b> | 383.1941 | 383.1945 | 41.2 | 56.7 | 98.6 |
| <b>43a{19}</b> | 383.1941 | 383.1940 | 42.9 | 59.1 | 98.7 |
| <b>43a{20}</b> | 295.2380 | 295.2371 | 1.0  | 1.8  | 0.0  |
| <b>43a{21}</b> | 329.2224 | 329.2180 | 24.5 | 39.3 | 98.6 |
| <b>43a{22}</b> | 393.1172 | 393.1173 | 25.0 | 33.6 | 90.2 |
| <b>43a{23}</b> | 340.2020 | 340.2041 | 28.0 | 43.4 | 99.8 |
| <b>43a{24}</b> | 359.2329 | 359.2320 | 3.0  | 4.4  | 82.0 |
| <b>43a{25}</b> | 354.2176 | 354.2171 | 10.0 | 14.9 | 62.0 |

### Carbamates 43b

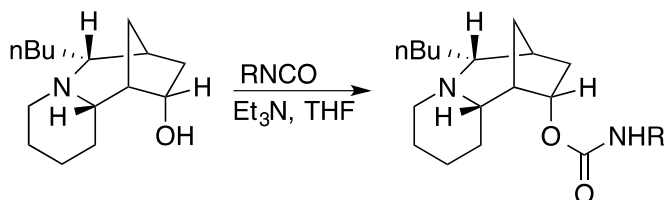

Isocyanate:

|                              |                                  |
|------------------------------|----------------------------------|
| {1} <i>n</i> -butyl          | {13} 4-fluoro phenyl             |
| {2} ethyl-4-butanoate        | {14} 3-bromo phenyl              |
| {3} phenyl                   | {15} 2-chloro phenyl             |
| {4} 4-chloro benzyl          | {16} 3-chlorophenyl              |
| {5} 3-phenyl propyl          | {17} 4-chloro phenyl             |
| {6} 2-(4'-ethylphenyl) ethyl | {18} 2-trifluoromethyl phenyl    |
| {7} 2-methyl phenyl          | {19} 3,4-(methylenedioxy) phenyl |
| {8} 4-methyl phenyl          | {20} 3-trifluoromethyl phenyl    |
| {9} 4-cyano phenyl           | {21} 4-trifluoromethyl phenyl    |
| {10} 3,5-dimethyl phenyl     | {22} benzyl                      |
| {11} 2-methoxy phenyl        | {23} 4-bromo phenyl              |
| {12} {13} 3-fluoro phenyl    | {24} 3-cyanophenyl               |

Following the procedure as described for the synthesis of carbamates **43a**, reaction of alcohol **16b** (45 mg, 0.19 mmol) with the corresponding isocyanate (0.57 mmol) in a 24 well Bohdan MiniBlock XT provided a library of carbamates **43b**.

| Compound      | Calc. mass | Found mass | Recovered | Yield(%) | Purity(%) |
|---------------|------------|------------|-----------|----------|-----------|
| <b>43b{1}</b> | 337.2850   | 337.2855   | 13.6      | 21.3     | 67.5      |
| <b>43b{2}</b> | 395.2905   | 395.2900   | 22.8      | 30.4     | 67.2      |
| <b>43b{3}</b> | 357.2537   | 357.2531   | 18.0      | 26.6     | 95.1      |
| <b>43b{4}</b> | 405.2304   | 405.2306   | 14.8      | 19.3     | 93.0      |
| <b>43b{5}</b> | 399.3006   | 399.2991   | 35.8      | 47.3     | 93.3      |
| <b>43b{6}</b> | 413.3163   | 413.3166   | 16.0      | 20.4     | 91.0      |
| <b>43b{7}</b> | 371.2693   | 371.2677   | 36.8      | 52.3     | 95.2      |

|                |          |          |      |      |       |
|----------------|----------|----------|------|------|-------|
| <b>43b{8}</b>  | 371.2693 | 371.2698 | 29.4 | 41.8 | 92.8  |
| <b>43b{9}</b>  | 382.2489 | 382.2456 | 36.0 | 49.7 | 98.4  |
| <b>43b{10}</b> | 385.2850 | 385.2813 | 34.2 | 46.8 | 97.9  |
| <b>43b{11}</b> | 387.2642 | 387.2618 | 31.4 | 42.8 | 96.3  |
| <b>43b{12}</b> | 375.2443 | 375.2466 | 35.6 | 50.1 | 94.0  |
| <b>43b{13}</b> | 375.2443 | 375.2449 | 33.8 | 47.5 | 94.2  |
| <b>43b{14}</b> | 435.1642 | 435.1610 | 44.3 | 53.7 | 66.7  |
| <b>43b{15}</b> | 391.2147 | 391.2154 | 31.4 | 42.4 | 84.7  |
| <b>43b{16}</b> | 391.2147 | 391.2128 | 35.8 | 48.3 | 92.6  |
| <b>43b{17}</b> | 391.2147 | 391.2126 | 6.0  | 8.1  | 95.4  |
| <b>43b{18}</b> | 425.2411 | 425.2404 | 25.6 | 31.8 | 87.4  |
| <b>43b{19}</b> | 401.2435 | 401.2365 | 43.7 | 57.5 | 99.3  |
| <b>43b{20}</b> | 425.2411 | 425.2383 | 31.0 | 38.5 | 92.7  |
| <b>43b{21}</b> | 425.2411 | 425.2416 | 30.0 | 37.2 | 91.3  |
| <b>43b{22}</b> | 371.2693 | 371.2669 | 28.2 | 40.1 | 100.0 |
| <b>43b{23}</b> | 435.1642 | 435.1621 | 28.6 | 34.7 | 93.3  |
| <b>43b{24}</b> | 382.2489 | 382.2455 | 37.1 | 51.2 | 98.3  |

### Carbamates 43c

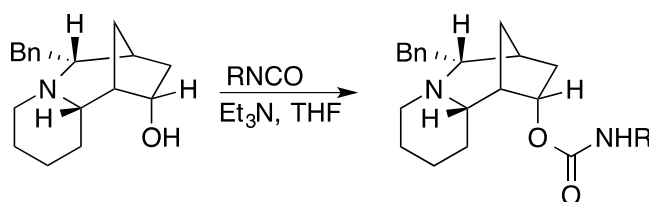

Isocyanate:

- |                               |                                  |
|-------------------------------|----------------------------------|
| {1} <i>n</i> -butyl           | {13} 3-fluoro phenyl             |
| {2} <i>tert</i> -butyl        | {14} 4-fluoro phenyl             |
| {3} ethyl-4-butanoate         | {15} 3-bromo phenyl              |
| {4} 2-methyl phenyl           | {16} 2-chloro phenyl             |
| {5} 4-methyl phenyl           | {17} 3-chlorophenyl              |
| {6} 4-cyano phenyl            | {18} 4-chloro phenyl             |
| {7} 3-cyano phenyl            | {19} 4-bromo phenyl              |
| {8} phenyl                    | {20} 3,4-(methylenedioxy) phenyl |
| {9} benzyl                    | {21} 3-trifluoromethyl phenyl    |
| {10} 3-phenyl propyl          | {22} 4-trifluoromethyl phenyl    |
| {11} 2-(4'-ethylphenyl) ethyl | {23} 3,5-dimethyl phenyl         |
| {12} 2-methoxy phenyl         | {24} 2-indolyl                   |

Following the procedure as described for the synthesis of carbamates **43a**, reaction of alcohol **16c** (51 mg, 0.19 mmol) with the appropriate isocyanate (0.57 mmol) in a 24 well Bohdan MiniBlock XT provided a library of carbamates **43c**.

| Compound       | Cal. Mass | Found mass | Recovered | Yield(%) | Purity(%) |
|----------------|-----------|------------|-----------|----------|-----------|
| <b>43c{1}</b>  | 371.2693  | 371.2707   | 3.7       | 5.3      | 16.0      |
| <b>43c{2}</b>  | 371.2693  | 371.2663   | 0.6       | 0.9      | 48.0      |
| <b>43c{3}</b>  | 429.2748  | 429.2738   | 28.0      | 34.4     | 98.4      |
| <b>43c{4}</b>  | 405.2537  | 405.2476   | 45.5      | 59.2     | 99.6      |
| <b>43c{5}</b>  | 405.2537  | 405.2544   | 48.4      | 63.0     | 97.2      |
| <b>43c{6}</b>  | 416.2333  | 416.2268   | 23.4      | 29.7     | 99.9      |
| <b>43c{7}</b>  | 416.2333  | 416.2168   | 41.7      | 52.9     | 100.0     |
| <b>43c{8}</b>  | 391.2380  | 391.2295   | 38.7      | 52.2     | 99.8      |
| <b>43c{9}</b>  | 405.2537  | 405.2414   | 35.3      | 46.0     | 76.2      |
| <b>43c{10}</b> | 433.2850  | 433.2820   | 32.0      | 39.0     | 97.1      |
| <b>43c{11}</b> | 447.3006  | 447.3018   | 19.7      | 23.2     | 97.3      |

|                |          |          |      |      |       |
|----------------|----------|----------|------|------|-------|
| <b>43c{12}</b> | 421.2486 | 421.2505 | 34.6 | 43.3 | 98.8  |
| <b>43c{13}</b> | 409.2286 | 409.2243 | 38.7 | 49.9 | 99.9  |
| <b>43c{14}</b> | 409.2286 | 409.2215 | 40.2 | 51.8 | 99.9  |
| <b>43c{15}</b> | 469.1485 | 469.1494 | 43.4 | 48.8 | 84.4  |
| <b>43c{16}</b> | 425.1991 | 425.1863 | 36.5 | 45.3 | 98.6  |
| <b>43c{17}</b> | 425.1991 | 425.1902 | 42.9 | 53.2 | 98.3  |
| <b>43c{18}</b> | 425.1991 | 425.1937 | 11.9 | 14.8 | 86.2  |
| <b>43c{19}</b> | 469.1485 | 469.1480 | 25.7 | 28.9 | 99.9  |
| <b>43c{20}</b> | 435.2279 | 435.2251 | 40.0 | 48.5 | 100.0 |
| <b>43c{21}</b> | 459.2254 | 459.2178 | 36.4 | 41.8 | 100.0 |
| <b>43c{22}</b> | 459.2254 | 459.2260 | 32.7 | 37.6 | 100.0 |
| <b>43c{23}</b> | 419.2693 | 419.2686 | 31.5 | 39.6 | 100.0 |
| <b>43c{24}</b> | 430.2489 | 430.2450 | 6.0  | 7.4  | 44.0  |

### Characterization data for representative library compounds

#### Carbamate **40{1}**

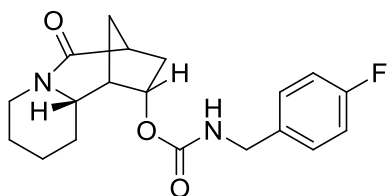

$\nu_{\max}$  (film)/ $\text{cm}^{-1}$  1634, 1709, 2943  $\text{cm}^{-1}$ ;  $\delta_{\text{H}}$  (400 MHz,  $\text{CDCl}_3$ ) 7.38 – 7.11 (m, 2H), 7.10 – 6.88 (m, 2H), 5.35 – 5.00 (m, 2H), 4.62 – 4.44 (m, 1H), 4.36 – 4.27 (m, 2H), 3.40 – 3.25 (m, 1H), 2.75 – 2.60 (m, 2H), 2.52 – 2.25 (m, 2H), 2.00 – 1.50 (m, 7H), 1.45 – 1.03 (m, 2H);  $\delta_{\text{C}}$  (100 MHz,  $\text{CDCl}_3$ ) 174.3, 163.4, 160.9, 156.1, 134.3, 129.3, 129.2, 115.6, 115.4, 62.2, 44.3, 42.0, 41.4, 35.0, 30.2, 25.5, 25.2;  $m/z$  (ESI+) found  $[\text{M}+\text{H}]^+$  347.1762.  $\text{C}_{19}\text{H}_{24}\text{FN}_2\text{O}_3^+$  requires 347.1765.

#### Carbamate **40{2}**

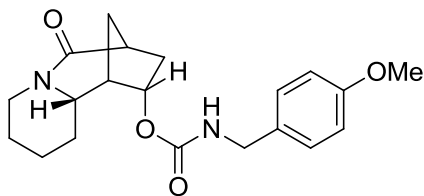

$\nu_{\max}$  (film)/ $\text{cm}^{-1}$  1634, 1710, 2941  $\text{cm}^{-1}$ ;  $\delta_{\text{H}}$  (400 MHz,  $\text{CDCl}_3$ ) 7.37 – 7.04 (m, 2H), 6.95 – 6.65 (m, 2H), 5.33 – 4.93 (m, 2H), 4.62 – 4.44 (m, 1H), 4.39 – 4.18 (m, 2H), 3.76 (s, 3H), 3.40 – 3.25 (m, 1H), 2.77 – 2.52 (m, 2H), 2.52 – 2.22 (m, 2H), 2.02 – 1.47 (m, 7H), 1.44 – 1.04 (m, 2H);  $\delta_{\text{C}}$  (100 MHz,  $\text{CDCl}_3$ ) 174.3, 159.0, 156.0, 130.6, 128.9, 114.0, 76.7, 62.1, 55.3, 44.5, 42.0, 41.4, 41.3, 35.0, 31.4, 30.1, 25.5, 25.1;  $m/z$  (ESI+) found  $[\text{M}+\text{H}]^+$  359.4450.  $\text{C}_{20}\text{H}_{27}\text{N}_2\text{O}_4^+$  requires 359.4455.

Carbamate **40**{3}

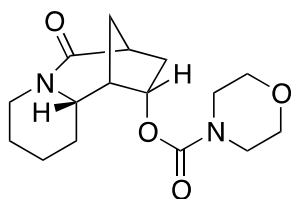

$\nu_{\max}$  (film)/ $\text{cm}^{-1}$  1636, 1697, 2943  $\text{cm}^{-1}$ ;  $\delta_{\text{H}}$  (400 MHz,  $\text{CDCl}_3$ ) 5.17 (dt,  $J = 11.1, 5.8$  Hz, 1H), 4.74 – 4.35 (m, 1H), 4.00 – 3.10 (m, 9H), 2.74 – 2.59 (m, 2H), 2.50 – 2.28 (m, 2H), 1.89 – 1.53 (m, 7H), 1.39 – 1.15 (m, 2H);  $\delta_{\text{C}}$  (100 MHz,  $\text{CDCl}_3$ ) 174.2, 154.8, 76.7, 66.5, 62.0, 44.3, 43.9, 41.9, 41.4, 41.2, 35.0, 30.2, 25.4, 25.3;  $m/z$  (ESI+) found  $[\text{M}+\text{H}]^+$  309.1805.  $\text{C}_{16}\text{H}_{25}\text{N}_2\text{O}_4^+$  requires 309.1809.

Carbamate **40**{4}

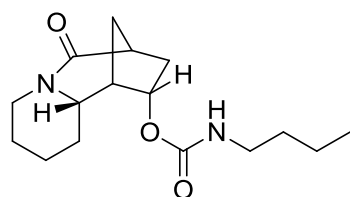

$\nu_{\max}$  (film)/ $\text{cm}^{-1}$  1635, 1711, 2938  $\text{cm}^{-1}$ ;  $\delta_{\text{H}}$  (400 MHz,  $\text{CDCl}_3$ ) 5.24 – 4.76 (m, 2H), 4.54 – 4.44 (m, 1H), 3.35 – 3.20 (m, 1H), 3.11 – 2.98 (m, 2H), 2.46 – 2.20 (m, 4H), 1.95 – 1.50 (m, 7H), 1.47 – 1.06 (m, 6H), 0.83 (t,  $J = 7.3$  Hz, 3H);  $\delta_{\text{C}}$  (100 MHz,  $\text{CDCl}_3$ ) 174.3, 156.0, 76.3, 62.1, 41.9, 41.3, 41.2, 40.6, 34.9, 31.9, 31.4, 29.9, 25.4, 25.1, 19.7, 13.6;  $m/z$  (ESI+) found  $[\text{M}+\text{H}]^+$  295.2018.  $\text{C}_{16}\text{H}_{27}\text{N}_2\text{O}_3^+$  requires 295.2016.

Carbamate **40**{5}

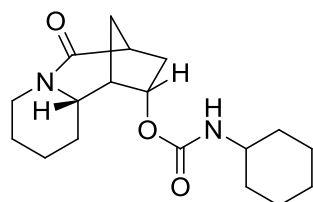

$\nu_{\max}$  (film)/ $\text{cm}^{-1}$  1635, 1710, 2936  $\text{cm}^{-1}$ ;  $\delta_{\text{H}}$  (400 MHz,  $\text{CDCl}_3$ ) 5.37 – 4.95 (m, 1H), 4.80 – 4.36 (m, 2H), 3.60 – 3.20 (m, 2H), 2.75 – 2.25 (m, 4H), 2.20 – 1.45 (m, 12H), 1.45 – 1.00 (m, 7H).  $\delta_{\text{C}}$  (100 MHz,  $\text{CDCl}_3$ ) 174.3, 155.2, 76.3, 62.1, 49.8, 42.0, 41.4, 41.3, 34.9, 33.5, 33.2, 31.4, 30.0, 25.5, 25.4, 25.2, 24.8, 24.7;  $m/z$  (ESI+) found  $[\text{M}+\text{H}]^+$  321.2170.  $\text{C}_{18}\text{H}_{29}\text{N}_2\text{O}_3^+$  requires 321.2173.

Carbamate **40**{15}

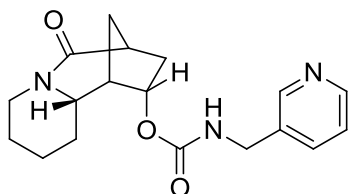

$\nu_{\max}$  (film)/ $\text{cm}^{-1}$  1635, 1712, 2940, 3261  $\text{cm}^{-1}$ ;  $\delta_{\text{H}}$  (400 MHz,  $\text{CDCl}_3$ ) 8.60 – 8.25 (m, 2H), 7.61 (d,  $J = 7.8$  Hz, 1H), 7.38 – 7.07 (m, 1H), 6.11 (t,  $J = 5.8$  Hz, 1H), 5.14 (dt,  $J = 10.8, 5.5$  Hz, 1H), 4.57 – 4.25 (m, 3H), 3.35 – 3.15 (m, 1H), 2.36 – 2.29 (m, 4H), 1.93 – 1.36 (m, 7H), 1.30 – 0.90 (m, 2H);  $\delta_{\text{C}}$  (100 MHz,  $\text{CDCl}_3$ ) 174.3, 156.2, 148.9, 148.6, 135.4, 134.4, 123.5, 76.7, 62.1, 42.4, 42.0, 41.4, 41.2, 35.1, 31.4, 30.0, 25.4, 25.1;  $m/z$  (ESI+) found  $[\text{M}+\text{H}]^+$  330.1810.  $\text{C}_{18}\text{H}_{24}\text{N}_3\text{O}_3^+$  requires 330.1812.

Carbamate **42**{7}

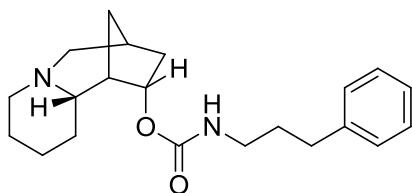

$\nu_{\max}$  (film)/ $\text{cm}^{-1}$  1695, 2934  $\text{cm}^{-1}$ ;  $\delta_{\text{H}}$  (400 MHz,  $\text{CDCl}_3$ ) 7.40 – 7.03 (m, 5H), 5.25 – 4.75 (m, 2H), 3.43 – 2.90 (m, 3H), 2.90 – 2.70 (m, 2H), 2.70 – 2.30 (m, 4H), 2.25 – 1.25 (m, 13H), 1.30 – 1.10 (m, 1H);  $\delta_{\text{C}}$  (100 MHz,  $\text{CDCl}_3$ ) 156.8, 141.5, 128.4, 128.3, 125.9, 67.9, 63.2, 56.6, 42.4, 40.8, 40.4, 37.5, 34.1, 33.9, 33.0, 31.6, 30.6, 25.5, 25.3;  $m/z$  (ESI+) found  $[\text{M}+\text{H}]^+$  343.2375.  $\text{C}_{21}\text{H}_{31}\text{N}_2\text{O}_2^+$  requires 343.2380.

Carbamate **40**{9}

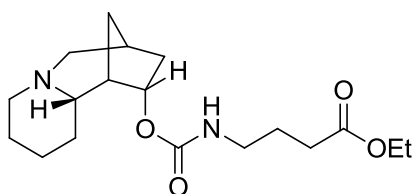

$\nu_{\max}$  (film)/ $\text{cm}^{-1}$  1715, 2934  $\text{cm}^{-1}$ ;  $\delta_{\text{H}}$  (400 MHz,  $\text{CDCl}_3$ ) 5.21 – 4.90 (m, 1H), 4.09 (q,  $J = 7.1$  Hz, 2H), 3.50 – 2.80 (m, 4H), 2.80 – 2.60 (m, 2H), 2.31 (t,  $J = 7.4$  Hz, 2H), 2.22 – 1.44 (m, 13H), 1.44 – 1.29 (m, 2H), 1.21 (t,  $J = 8$  Hz, 3H), 1.21 – 0.99 (m, 1H);  $\delta_{\text{C}}$  (100 MHz,  $\text{CDCl}_3$ ) 173.2, 156.8, 76.7, 67.8, 63.1, 60.4, 56.6, 42.3, 40.9, 40.2, 37.4, 34.0, 33.9, 31.4, 30.6, 25.5, 25.2, 14.1;  $m/z$  (ESI+) found  $[\text{M}+\text{H}]^+$  339.2270.  $\text{C}_{18}\text{H}_{31}\text{N}_2\text{O}_4^+$  requires 339.2278.

Carbamate **43a**{2}

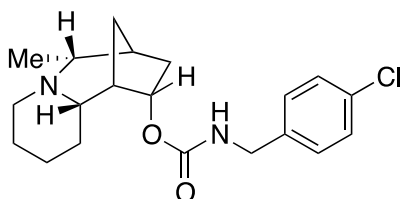

$\nu_{\max}$  (film)/ $\text{cm}^{-1}$  1704, 2935  $\text{cm}^{-1}$ ;  $\delta_{\text{H}}$  (400 MHz,  $\text{CDCl}_3$ ) 7.28 (dd,  $J = 4.7, 3.6$  Hz, 2H), 7.23 (d,  $J = 8.3$  Hz, 2H), 5.35 (br s, 1H), 5.10 (dt,  $J = 10.8, 5.4$  Hz, 1H), 4.38 (dd,  $J = 15.2, 6.4$  Hz, 1H), 4.28 (dd,  $J = 15.2, 5.9$  Hz, 1H), 3.30 – 3.10 (m, 1H), 2.15 – 1.92 (m, 4H), 1.89 – 1.42 (m, 9H), 1.37 (d,  $J = 12.4$  Hz, 1H), 1.27 – 1.08 (m, 1H), 1.03 (d,  $J = 8.0$  Hz, 3H);  $\delta_{\text{C}}$  (100 MHz,  $\text{CDCl}_3$ ) 156.8, 137.3, 133.0, 128.8, 128.6, 68.3, 63.7, 52.7, 44.3, 43.1, 41.0, 40.9, 37.7, 31.2, 29.9, 25.9, 25.7, 18.3;  $m/z$  (ESI+) found  $[\text{M}+\text{H}]^+$  368.1830.  $\text{C}_{20}\text{H}_{28}\text{ClN}_2\text{O}_2^+$  requires 363.1834.

Carbamate **43a**{3}

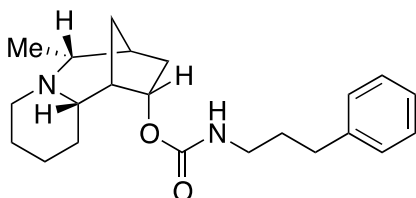

$\nu_{\max}$  (film)/ $\text{cm}^{-1}$  1697, 2931  $\text{cm}^{-1}$ ;  $\delta_{\text{H}}$  (400 MHz,  $\text{CDCl}_3$ ) 7.42 – 7.24 (m, 2H), 7.19 (dd,  $J = 10.2, 4.5$  Hz, 3H), 5.10 (dt,  $J = 10.8, 5.4$  Hz, 1H), 4.96 (br s, 1H), 3.34 – 3.08 (m, 3H), 2.79 – 2.49 (m, 4H), 2.14 – 1.98 (m, 4H), 1.93 – 1.33 (m, 10H), 1.25 – 1.05 (m, 1H); 1.05 (d,  $J = 8.0$  Hz, 3H);  $\delta_{\text{C}}$  (100 MHz,  $\text{CDCl}_3$ ) 156.8, 141.5, 128.4, 128.3, 125.9, 68.4, 63.7, 52.8, 43.1, 41.0, 40.9, 40.4, 37.7, 33.0, 31.6, 31.2, 29.9, 26.0, 25.8, 18.3;  $m/z$  (ESI+) found  $[\text{M}+\text{H}]^+$  357.2531.  $\text{C}_{22}\text{H}_{33}\text{N}_2\text{O}_2^+$  requires 357.2537.

Carbamate **43b**{11}

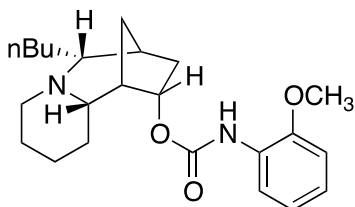

$\nu_{\max}$  (film)/ $\text{cm}^{-1}$  1602, 1723, 2935  $\text{cm}^{-1}$ ;  $\delta_{\text{H}}$  (400 MHz,  $\text{CDCl}_3$ ) 8.12 (dd,  $J = 7.6, 2.1$  Hz, 1H), 7.39 (br s, 1H), 7.05 – 6.89 (m, 2H), 6.87 – 6.76 (m, 1H), 5.18 (dt,  $J = 10.9, 5.6$  Hz, 1H), 3.83 (s, 3H), 3.40 – 3.25 (m, 1H), 2.21 (m, 1H), 2.13 – 1.95 (m, 3H), 1.96 – 1.00 (m, 17H), 0.89 (t,  $J = 7.1$  Hz, 3H);  $\delta_{\text{C}}$  (100 MHz,  $\text{CDCl}_3$ ) 153.7, 147.6, 127.9, 122.4, 121.0, 118.1, 109.9, 77.5, 69.4, 68.9, 55.5, 52.9, 43.1, 37.3, 37.1, 31.4, 30.7, 29.8, 29.6, 26.1, 25.8, 23.0, 14.0;  $m/z$  (ESI+) found  $[\text{M}+\text{H}]^+$  287.2635.  $\text{C}_{23}\text{H}_{35}\text{N}_2\text{O}_3^+$  requires 387.2642.

Carbamate **43b**{9}

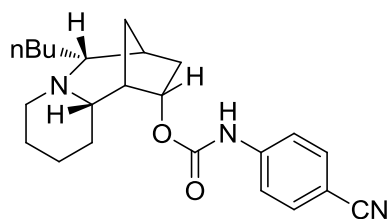

$\nu_{\max}$  (film)/ $\text{cm}^{-1}$  1596, 1727, 2222, 2931  $\text{cm}^{-1}$ ;  $\delta_{\text{H}}$  (400 MHz,  $\text{CDCl}_3$ ) 7.65 – 7.37 (m, 5H), 5.15 (dt,  $J$  = 11.0, 5.5 Hz, 1H), 3.28 (d,  $J$  = 11.2 Hz, 1H), 2.20 – 2.15 (m, 1H), 2.11 – 1.95 (m, 3H), 1.89 (d,  $J$  = 6.7 Hz, 1H), 1.85 – 1.34 (m, 11H), 1.34 – 1.05 (m, 6H), 0.86 (t,  $J$  = 7.1 Hz, 3H);  $\delta_{\text{C}}$  (100 MHz,  $\text{CDCl}_3$ ) 153.26, 142.6, 133.2, 119.0, 118.2, 105.7, 78.1, 69.2, 68.6, 52.7, 43.0, 40.9, 37.1, 31.5, 30.7, 30.1, 29.5, 26.0, 25.7, 23.0, 14.0.  $m/z$  (ESI+) found  $[\text{M}+\text{H}]^+$  382.2486.  $\text{C}_{23}\text{H}_{32}\text{N}_3\text{O}_2^+$  requires 382.2489.

Carbamate **43c**{4}

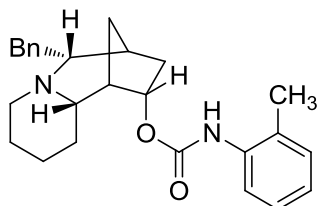

$\nu_{\max}$  (film)/ $\text{cm}^{-1}$  1720, 2935  $\text{cm}^{-1}$ ;  $\delta_{\text{H}}$  (400 MHz,  $\text{CDCl}_3$ ) 7.77 (s, 1H), 7.29 (dd,  $J$  = 8.1, 6.6 Hz, 2H), 7.25 – 7.10 (m, 5H), 7.04 (t,  $J$  = 7.3 Hz, 1H), 6.63 (s, 1H), 5.17 (dt,  $J$  = 10.9, 5.6 Hz, 1H), 3.60 – 3.40 (d,  $J$  = 10.3 Hz, 1H), 3.20 (dd,  $J$  = 13.3, 2.7 Hz, 1H), 2.50 – 1.20 (m, 19H);  $\delta_{\text{C}}$  (100 MHz,  $\text{CDCl}_3$ ) 153.8, 140.2, 136.0, 130.4, 129.5, 128.3, 126.7, 125.9, 124.2, 70.6, 68.7, 52.9, 43.1, 41.0, 37.2, 37.1, 35.8, 31.4, 29.7, 26.1, 25.7, 17.9;  $m/z$  (ESI+) found  $[\text{M}+\text{H}]^+$  405.2528.  $\text{C}_{26}\text{H}_{33}\text{N}_2\text{O}_2^+$  requires 405.2537.

Carbamate **43c**{5}

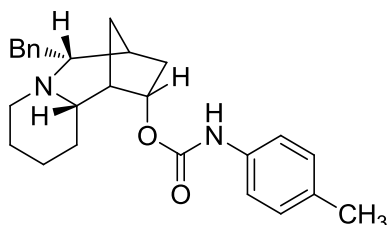

$\nu_{\max}$  (film)/ $\text{cm}^{-1}$  1718, 2935  $\text{cm}^{-1}$ ;  $\delta_{\text{H}}$  (400 MHz,  $\text{CDCl}_3$ ) 7.38 – 7.25 (m, 4H), 7.25–7.21 (m, 1H), 7.18 – 7.06 (m, 4H), 6.85 (s, 1H), 5.19 (dt,  $J$  = 10.9, 5.5 Hz, 1H), 3.57 (d,  $J$  = 11.1 Hz, 1H), 3.21 (dd,  $J$  = 13.3, 2.9 Hz, 1H), 2.63 (s, 3H), 2.40 – 2.35 (m, 1H), 2.25 – 1.60 (m, 12H), 1.60 – 1.40 (m, 1H), 1.37 (dd,  $J$  = 11.6, 2.3 Hz, 1H), 1.31 – 1.12 (m, 1H);  $\delta_{\text{C}}$  (100 MHz,  $\text{CDCl}_3$ ) 153.8, 140.21, 135.59, 132.79, 129.5, 128.3, 125.9, 120.0, 118.6, 70.6, 68.9, 53.0, 43.2, 41.0, 37.3, 37.2, 35.8, 31.5, 29.9, 26.1, 25.8, 20.7;  $m/z$  (ESI+) found  $[\text{M}+\text{H}]^+$  405.2544.  $\text{C}_{26}\text{H}_{33}\text{N}_2\text{O}_2^+$  requires 405.2537.



### Carbamate **43c**{8}

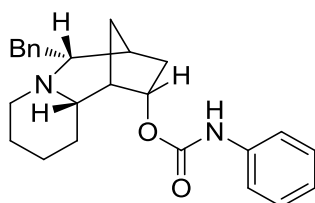

$\nu_{\max}$  (film)/ $\text{cm}^{-1}$  1600, 1702, 2933  $\text{cm}^{-1}$ ;  $\delta_{\text{H}}$  (400 MHz,  $\text{CDCl}_3$ ) 7.45 (dd,  $J = 8.6, 1.0$  Hz, 2H), 7.39 – 7.26 (m, 4H), 7.22 (dd,  $J = 8.4, 6.3$  Hz, 1H), 7.18 – 7.12 (m, 2H), 7.12 – 7.04 (m, 1H), 6.88 (s, 1H), 5.32 – 5.08 (m, 1H), 3.59 – 3.56 (m, 1H), 3.22 (dd,  $J = 13.3, 3.0$  Hz, 1H), 2.41 (dd,  $J = 13.2, 10.1$  Hz, 1H), 2.36 – 2.24 (m, 1H), 2.25 – 2.06 (m, 3H), 2.06 – 1.56 (m, 8H), 1.52 – 1.45 (m, 1H), 1.37 (dd,  $J = 11.6, 2.4$  Hz, 1H), 1.24 (m, 1H);  $\delta_{\text{C}}$  (100 MHz,  $\text{CDCl}_3$ ) 153.6, 140.1, 138.1, 129.5, 129.0, 128.3, 125.9, 123.2, 118.5, 70.6, 68.9, 53.0, 43.2, 41.0, 37.3, 37.2, 35.8, 31.6, 29.9, 26.1, 25.7;  $m/z$  (ESI+) found  $[\text{M}+\text{H}]^+$  391.2387.  $\text{C}_{25}\text{H}_{31}\text{N}_2\text{O}_2^+$  requires 391.2380.

### D. Mesembrine-inspired libraries.

#### General procedures for library preparation and tabulated results.

#### Amines **44**:

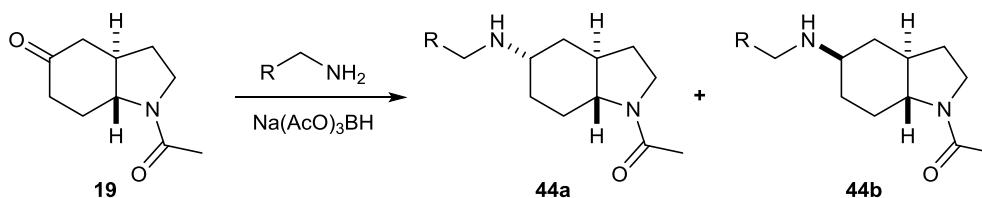

Amine:

- |                                  |                                           |
|----------------------------------|-------------------------------------------|
| {1} R = phenyl                   | {13} R = 4-methylphenyl                   |
| {2} R = 2-chlorophenyl           | {14} R = 2-methoxyphenyl                  |
| {3} R = 3-chlorophenyl           | {15} R = 3-methoxyphenyl                  |
| {4} R = 4-chlorophenyl           | {16} R = 3,4-dimethoxyphenyl              |
| {5} R = 2-fluorophenyl           | {17} R = 4-hydroxyphenyl                  |
| {6} R = 3-fluorophenyl           | {18} R = 4-chloro-3-trifluoromethylphenyl |
| {7} R = 4-fluorophenyl           | {19} R = 2-thienyl                        |
| {8} R = 4-bromophenyl            | {20} R = 2-furyl                          |
| {9} R = 3,4-dichlorophenyl       | {21} R = 3-methylfuryl                    |
| {10} R = 2-trifluoromethylphenyl | {22} R = 2-pyridyl                        |
| {11} R = 2-methylphenyl          | {23} R = 2-(2-pyridyl)methyl              |
| {12} R = 3-methylphenyl          | {24} R = cyclohexyl                       |

A solution of ketone scaffold **19** (50 mg, 0.27 mmol) in anhydrous THF (2 mL) was added to a 4-dram vial flushed with argon. The appropriate amine (0.54 mmol) was added, followed by acetic acid (21  $\mu\text{L}$ , 0.36 mmol). The reaction was stirred at room temperature for 1 h, then sodium triacetoxyborohydride (150 mg, 0.72 mmol) added. The reactions were shaken for a further 13 h, then quenched by addition of 2M NaOH (0.5 mL) and shaken for an additional 10 min. Dichloromethane (2 mL) was added to each tube and the reactions passed through Isolute hydrophobic phase separator tubes, which allowed the halogenated solvent layer to pass through. The aqueous layers were extracted with dichloromethane (2 x 2 mL). The combined organics were

evaporated in a Genevac EZ-2 Plus parallel evaporator and subjected to mass-directed preparative HPLC purification to afford pure amines **44a** and **44b**.

| Product         | Calculated mass | Found mass | Recovered weight<br>(mg) | Yield (%) | Purity (%) |
|-----------------|-----------------|------------|--------------------------|-----------|------------|
| <b>44a</b> {1}  | 273.1967        | 273.1966   | 15.5                     | 20        | 100        |
| <b>44a</b> {2}  | 307.1577        | 307.1600   | 30.0                     | 35        | 100        |
| <b>44a</b> {3}  | 307.1577        | 307.1602   | 30.5                     | 35        | 100        |
| <b>44a</b> {4}  | 307.1577        | 307.1589   | 2.0                      | 02        | 99         |
| <b>44a</b> {5}  | 291.1873        | 277.1695   | 5.6                      | 07        | 83         |
| <b>44a</b> {6}  | 291.1873        | 291.1875   | 7.6                      | 10        | 100        |
| <b>44a</b> {7}  | 291.1873        | 291.1879   | 5.2                      | 07        | 100        |
| <b>44a</b> {8}  | 351.1072        | 351.1096   | 26.1                     | 27        | 100        |
| <b>44a</b> {9}  | 341.1187        | 341.1198   | 33.2                     | 35        | 100        |
| <b>44a</b> {10} | 341.1841        | 341.1850   | 30.9                     | 33        | 100        |
| <b>44a</b> {11} | 287.2123        | 287.2129   | 24.1                     | 35        | 100        |
| <b>44a</b> {12} | 287.2123        | 287.2156   | 26.1                     | 33        | 100        |
| <b>44a</b> {13} | 287.2123        | 287.2120   | 3.1                      | 04        | 100        |
| <b>44a</b> {14} | 303.2073        | 303.2083   | 13.4                     | 16        | 98         |
| <b>44a</b> {15} | 303.2073        | 303.2075   | 25.3                     | 32        | 100        |
| <b>44a</b> {16} | 333.2178        | 333.2188   | 28.6                     | 31        | 100        |
| <b>44a</b> {17} | 289.1916        | 289.1940   | 2.7                      | 04        | 100        |
| <b>44a</b> {18} | 375.1451        | 375.1464   | 31.1                     | 30        | 98         |
| <b>44a</b> {19} | 279.1531        | 279.1556   | 22.3                     | 29        | 100        |
| <b>44a</b> {20} | 263.1760        | 263.1783   | 16.8                     | 23        | 100        |
| <b>44a</b> {21} | 277.1916        | 277.1955   | 23.7                     | 31        | 100        |
| <b>44a</b> {22} | 274.1919        | 274.1931   | 20.8                     | 28        | 100        |
| <b>44a</b> {23} | 288.2076        | 288.2100   | 18.1                     | 23        | 86         |
| <b>44a</b> {24} | 265.2280        | 265.2302   | 9.9                      | 13        | 94         |
| <b>44b</b> {1}  | 273.1967        | 273.1983   | 7.0                      | 09        | 100        |
| <b>44b</b> {2}  | 307.1577        | 307.1599   | 12.8                     | 15        | 100        |
| <b>44b</b> {3}  | 307.1577        | 307.1586   | 14.3                     | 17        | 100        |
| <b>44b</b> {5}  | 291.1873        | 277.1680   | 2.7                      | 03        | 97         |
| <b>44b</b> {8}  | 351.1072        | 351.1075   | 14.5                     | 15        | 100        |
| <b>44b</b> {11} | 287.2123        | 287.2148   | 10.4                     | 13        | 100        |
| <b>44b</b> {12} | 287.2123        | 287.2134   | 10.2                     | 13        | 100        |
| <b>44b</b> {15} | 303.2073        | 303.2091   | 9.6                      | 12        | 100        |
| <b>44b</b> {18} | 375.1451        | 375.1466   | 19.6                     | 19        | 100        |
| <b>44b</b> {19} | 279.1531        | 279.1551   | 10.2                     | 13        | 100        |
| <b>44b</b> {20} | 263.1760        | 263.1783   | 10.2                     | 10        | 86         |
| <b>44b</b> {21} | 277.1916        | 277.1950   | 10.1                     | 13        | 100        |
| <b>44b</b> {22} | 274.1919        | 274.1939   | 8.7                      | 12        | 84         |

## Quinolines 45 from 2-nitrobenzaldehydes

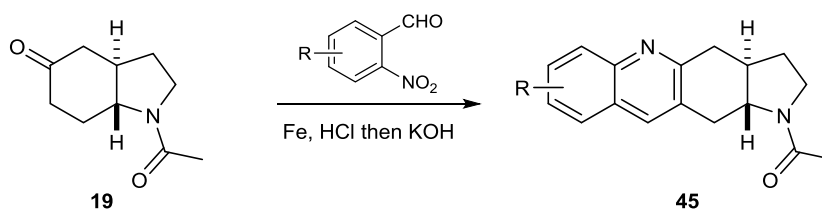

Nitrobenzaldehyde:

- |                           |                              |
|---------------------------|------------------------------|
| {1} R = H                 | {5} R = 5-OH                 |
| {2} R = 5-Cl              | {6} R = 6-Cl                 |
| {3} R = 3-OMe             | {7} 1-nitro-2-naphthaldehyde |
| {4} R = 4-CF <sub>3</sub> |                              |

Fe<sup>0</sup> powder (90 mg, 1.6 mmol) was added to a solution of the appropriate 2-nitrobenzaldehyde (0.41 mmol) in ethanol (2 mL) in a microwave vial, followed by 0.1 M HCl (210  $\mu$ L). The vial was sealed, then heated in an oil bath at 85  $^{\circ}$ C until complete by TLC ( $\sim$ 2 h). The mixture was cooled to room temperature, then a solution of ketone scaffold **19** (50 mg, 0.27 mmol) in EtOH (1 mL) added, followed by powdered KOH (22 mg, 0.38 mmol). The mixture was heated at 85  $^{\circ}$ C until complete by TLC ( $\sim$ 3 h), then cooled to room temperature, passed through a celite plug, eluting with dichloromethane, and concentrated under reduced pressure. The residues were subjected to mass-directed preparative HPLC purification to afford pure quinolines **45**.

| Product       | Calculated mass | Found mass | Recovered weight<br>(mg) | Yield (%) | Purity (%) |
|---------------|-----------------|------------|--------------------------|-----------|------------|
| <b>45</b> {1} | 267.1497        | 267.1496   | 27.1                     | 51        | 93         |
| <b>45</b> {2} | 301.1108        | 301.1130   | 30.0                     | 46        | 100        |
| <b>45</b> {3} | 297.1603        | 297.1613   | 36.5                     | 60        | 92         |
| <b>45</b> {4} | 335.1371        | 335.1383   | 39.0                     | 58        | 100        |
| <b>45</b> {5} | 283.1447        | 283.1438   | 41.0                     | 73        | 100        |
| <b>45</b> {6} | 301.1108        | 301.1117   | 39.4                     | 66        | 100        |
| <b>45</b> {7} | 317.1654        | 317.1667   | 9.7                      | 15        | 88         |

## Quinolines 45 from 2-aminoacetophenones and 2-aminobenzophenones

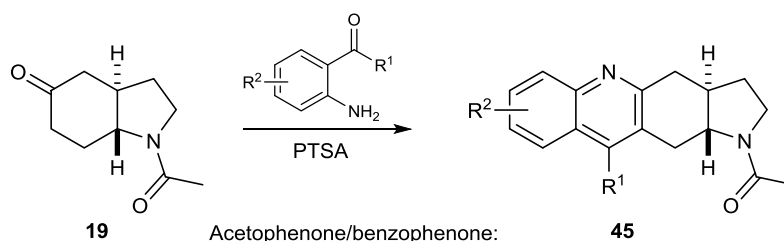

Acetophenone/benzophenone:

- |                                                                    |
|--------------------------------------------------------------------|
| {8} R <sup>1</sup> = Me, R <sub>2</sub> = H                        |
| {9} R <sup>1</sup> = Me, R <sub>2</sub> = 4,5-OMe                  |
| {10} R <sup>1</sup> = Me, R <sub>2</sub> = 4,5-OCH <sub>2</sub> O- |
| {11} R <sup>1</sup> = Ph, R <sub>2</sub> = 5-Cl                    |
| {12} R <sup>1</sup> = Ph, R <sub>2</sub> = 5-NO <sub>2</sub>       |

Ketone scaffold **19** (50 mg, 0.27 mmol) was placed in a 2-dram vial containing a magnetic stir bar. The appropriate 2-amino benzophenone or 2-amino acetophenone (0.30 mmol) was then added, followed by *p*-toluenesulphonic acid (0.27 mmol). The vial was sealed shut and heated at 100  $^{\circ}$ C in

an oil bath for 12 h, then cooled to room temperature, diluted with dichloromethane (2 ml) and quenched with 0.1M NaOH (5 ml). The reactions were passed through Isolute hydrophobic phase separator tubes, which allowed the halogenated solvent layer to pass through. The combined organics were evaporated in a Genevac EZ-2 Plus parallel evaporator and subjected to mass-directed preparative HPLC purification to afford pure quinolines **45**.

| Product        | Calculated mass | Found mass | Recovered weight (mg) | Yield (%) | Purity (%) |
|----------------|-----------------|------------|-----------------------|-----------|------------|
| <b>45</b> {8}  | 281.1654        | 281.1662   | 28.7                  | 45        | 100        |
| <b>45</b> {9}  | 341.1865        | 341.1891   | 13.0                  | 10        | 100        |
| <b>45</b> {10} | 325.1552        | 325.1565   | 42.8                  | 60        | 86         |
| <b>45</b> {11} | 377.1421        | 377.1414   | 49.6                  | 60        | 100        |
| <b>45</b> {12} | 388.1661        | 388.1677   | 35.2                  | 41        | 100        |

### Characterization data for representative library compounds

#### Quinoline **45**{2}

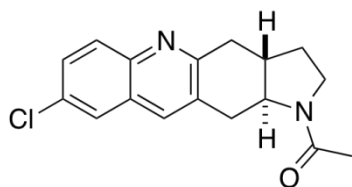

$\delta_{\text{H}}$  (400 MHz,  $\text{CDCl}_3$ ) At ambient temperature, a 5:1 mixture of rotamers was observed. Major rotamer: 7.96 – 7.80 (m, 2H), 7.72 (d,  $J = 2.3$  Hz, 1H), 7.56 (dd,  $J = 9.0, 2.3$  Hz, 1H), 4.25 (dd,  $J = 16.2, 4.7$  Hz, 1H), 3.77 – 3.38 (m, 4H), 3.04 – 2.77 (m, 2H), 2.32 – 2.16 (m, 2H), 2.12 (s, 3H), 1.83 – 1.71 (m, 1H). Minor rotamer (characteristic signals): 4.02 (dd,  $J = 11.9, 8.1$  Hz, 1H), 3.08 – 2.97 (m, 1H), 2.13 (s, 3H);  $\delta_{\text{C}}$  (125 MHz,  $\text{CDCl}_3$ ) Major rotamer: 170.9, 157.9, 145.2, 136.1, 131.8, 130.4, 130.1, 127.7, 125.9, 60.3, 49.1, 42.9, 38.3, 35.6, 30.3, 23.4;  $m/z$  (ESI+) found  $[\text{M}+\text{H}]^+$  301.1130.  $\text{C}_{17}\text{H}_{18}\text{ClN}_2\text{O}^+$ : requires 301.1108.

#### Quinoline **45**{8}

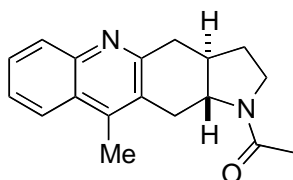

$\delta_{\text{H}}$  (400 MHz,  $\text{CDCl}_3$ ) At ambient temperature, a 5:1 mixture of rotamers was observed. Major rotamer: 7.98 (dd,  $J = 18.3, 8.3$  Hz, 2H), 7.74 – 7.57 (m, 1H), 7.49 (m, 1H), 4.29 (dd,  $J = 16.3, 5.0$  Hz, 1H), 3.83 – 3.33 (m, 4H), 3.01 (dd,  $J = 16.8, 12.7$  Hz, 1H), 2.68 – 2.60 (m, 4H), 2.35 – 2.09 (m, 5H), 1.75 (dd,  $J = 11.6, 8.6$  Hz, 1H). Minor rotamer (characteristic signals): 4.18 – 4.05 (m, 1H), 2.89 (d,  $J = 16.4$  Hz, 1H), 2.17 (s, 3H);  $\delta_{\text{C}}$  (125 MHz,  $\text{CDCl}_3$ ) Major rotamer: 171.0, 156.9, 146.2, 143.4, 129.1, 128.7, 127.4, 126.8, 125.8, 123.6, 61.0, 49.3, 42.3, 38.9, 33.7, 30.3, 23.5, 14.3;  $m/z$  (ESI+) found  $[\text{M}+\text{H}]^+$  281.1662.  $\text{C}_{18}\text{H}_{21}\text{N}_2\text{O}^+$ : requires 281.1654.

Quinoline **45**{11}

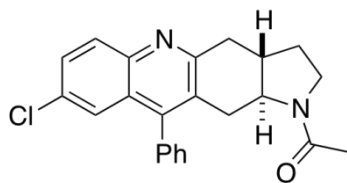

$\delta_{\text{H}}$  (500 MHz,  $\text{CDCl}_3$ ) At ambient temperature, a 5:1 mixture of rotamers was observed. Major rotamer: 7.97 – 7.92 (m, 1H), 7.58 – 7.51 (m, 2H), 7.49 – 7.44 (m, 2H), 7.29 – 7.24 (m, 2H), 7.16 – 7.09 (m, 1H), 3.89 – 3.77 (dd,  $J = 16.8, 4.8$  Hz, 1H), 3.74 – 3.63 (m, 1H), 3.62 – 3.41 (m, 2H), 3.14 – 2.99 (m, 1H), 2.50 – 2.39 (dd,  $J = 16.8, 11.4$  Hz, 1H), 2.29 – 2.12 (m, 2H), 2.07 – 1.94 (s, 3H), 1.80 – 1.67 (m, 2H). Minor rotamer (characteristic signals): 4.04 (dd,  $J = 11.8, 8.0$  Hz, 1H), 3.28 – 3.20 (m, 1H), 2.70 – 2.62 (m, 1H), 1.85 (s, 3H), 1.67 – 1.58 (m, 1H);  $\delta_{\text{C}}$  (125 MHz,  $\text{CDCl}_3$ ) Major rotamer: 170.7, 157.8, 148.0, 144.9, 136.0, 131.7, 130.2, 129.8, 129.3, 129.0, 128.8, 128.5, 128.0, 127.4, 124.9, 60.8, 49.2, 42.5, 39.0, 34.4, 30.3, 23.4;  $m/z$  (ESI+) found  $[\text{M}+\text{H}]^+$  377.1414.  $\text{C}_{23}\text{H}_{22}\text{ClN}_2\text{O}^+$ : requires 377.1421.

Quinoline **45**{12}

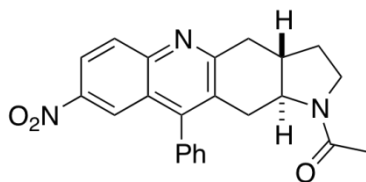

$\delta_{\text{H}}$  (500 MHz,  $\text{CDCl}_3$ ) At ambient temperature, a 3.5:1 mixture of rotamers was observed. Major rotamer: 8.38 (dd,  $J = 9.2, 2.5$  Hz, 1H), 8.29 (d,  $J = 2.5$  Hz, 1H), 8.11 (d,  $J = 9.2$  Hz, 1H), 7.59 (tt,  $J = 7.4, 3.4$  Hz, 1H), 7.54 – 7.49 (m, 2H), 7.31 – 7.27 (m, 1H), 7.19 – 7.14 (m, 1H), 3.89 (dd,  $J = 16.9, 4.7$  Hz, 1H), 3.75 – 3.67 (m, 1H), 3.58 (dt,  $J = 17.2, 4.8$  Hz, 2H), 3.48 (td,  $J = 11.1, 4.7$  Hz, 1H), 3.11 (dd,  $J = 17.3, 12.8$  Hz, 1H), 2.49 (dd,  $J = 16.9, 11.4$  Hz, 1H), 2.30 – 2.17 (m, 2H), 2.03 (s, 3H), 1.82 – 1.70 (m, 1H). Minor rotamer (characteristic signals): 3.35 – 3.25 (m, 1H), 2.72 (dd,  $J = 16.1, 11.4$  Hz, 1H), 2.43 – 2.30 (m, 1H);  $\delta_{\text{C}}$  (125 MHz,  $\text{CDCl}_3$ ) Major rotamer: 170.8, 161.8, 150.7, 148.5, 145.3, 135.0, 130.4, 129.5, 129.4, 129.2, 129.1, 129.0, 128.8, 125.8, 123.3, 122.4, 60.6, 49.2, 42.3, 39.3, 34.5, 30.3, 23.4;  $m/z$  (ESI+) found  $[\text{M}+\text{H}]^+$  388.1677.  $\text{C}_{23}\text{H}_{22}\text{N}_3\text{O}_3^+$ : requires 388.1661.

Quinoline **45**{10}

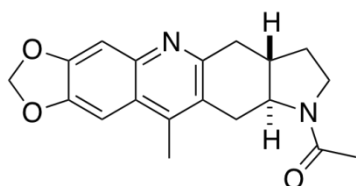

$\delta_{\text{H}}$  (500 MHz,  $\text{CDCl}_3$ ) At ambient temperature, a 2:1 mixture of rotamers was observed. Major rotamer: 7.54 – 7.35 (m, 2H), 6.28 – 6.25 (m, 1H), 6.09 (s, 1H), 4.40 (dd,  $J = 16.0, 5.0$  Hz, 1H), 3.99 –

3.88 (m, 1H), 3.80 (td,  $J = 10.7, 10.2, 6.1$  Hz, 1H), 3.68 (tq,  $J = 11.5, 6.4, 5.6$  Hz, 1H), 3.57 – 3.46 (m, 1H), 3.21 – 3.06 (m, 1H), 2.84 – 2.73 (m, 1H), 2.73 – 2.61 (m, 4H), 2.49 – 2.38 (m, 1H), 2.37 – 2.25 (m, 3H), 1.99 – 1.85 (m, 1H). Minor rotamer (characteristic signals): 4.30 – 4.26 (m, 1H), 3.64 – 3.59 (m, 1H), 3.02 – 2.97 (m, 1H);  $\delta_c$  (125 MHz,  $CDCl_3$ ) Major rotamer: 170.9, 154.4, 149.9, 147.6, 125.7, 123.5, 109.1, 105.4, 101.6, 99.3, 96.8, 61.0, 49.3, 42.4, 38.5, 33.4, 30.3, 23.5, 14.7;  $m/z$  (ESI+) found  $[M+H]^+$  325.1565.  $C_{19}H_{21}N_2O_3^+$ : requires 325.1552.

#### Amine **44a**{3}

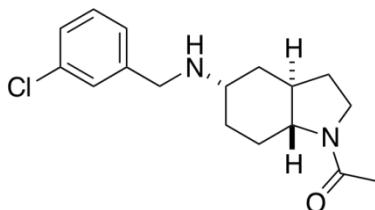

$\delta_H$  (500 MHz,  $CDCl_3$ ) At ambient temperature, a 2.6:1 mixture of rotamers was observed. Major rotamer: 7.32 (s, 1H), 7.27 – 7.17 (m, 3H), 3.86 – 3.76 (m, 2H), 3.52 (dd,  $J = 9.7, 8.4$  Hz, 1H), 3.42 (td,  $J = 10.5, 6.4$  Hz, 1H), 3.05 – 2.90 (m, 2H), 2.70 – 2.54 (m, 1H), 2.26 – 2.13 (m, 1H), 2.12 – 1.97 (m, 4H), 1.94 – 1.80 (m, 2H), 1.67 – 1.36 (m, 2H), 1.36 – 1.04 (m, 2H). Minor rotamer (characteristic signals): 3.79 – 3.65 (m, 1H), 3.16 (td,  $J = 11.7, 6.3$  Hz, 1H), 2.27 (dq,  $J = 11.8, 3.3$  Hz, 1H);  $\delta_c$  (125 MHz,  $CDCl_3$ ) Major rotamer: 170.8, 142.8, 134.3, 129.8, 128.2, 127.2, 126.2, 64.0, 56.3, 50.8, 49.1, 44.9, 36.3, 32.2, 29.7, 29.4, 23.4;  $m/z$  (ESI+) found  $[M+H]^+$  307.1586.  $C_{17}H_{24}ClN_2O^+$ : requires 307.1577.

#### Amine **44b**{3}

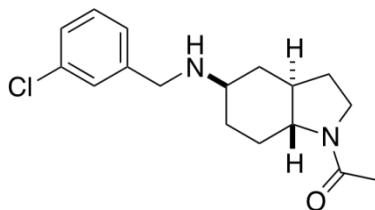

$\delta_H$  (500 MHz,  $CDCl_3$ ) At ambient temperature, a 3:1 mixture of rotamers was observed. Major rotamer: 7.32 (s, 1H), 7.25 – 7.16 (m, 3H), 3.78 – 3.66 (m, 2H), 3.53 – 3.34 (m, 2H), 3.01 – 2.85 (m, 2H), 2.82 – 2.71 (m, 1H), 2.12 – 1.70 (m, 7H), 1.61 – 1.29 (m, 4H). Minor rotamer (characteristic signals): 3.83 (dd,  $J = 11.8, 8.1$  Hz, 1H), 3.30 (td,  $J = 11.6, 6.3$  Hz, 1H), 2.07 (s, 3H);  $\delta_c$  (125 MHz,  $CDCl_3$ ) Major rotamer: 170.8, 143.2, 134.3, 129.7, 128.1, 127.1, 126.2, 64.4, 51.8, 51.3, 48.6, 39.7, 34.2, 30.0, 29.6, 26.3, 23.5;  $m/z$  (ESI+) found  $[M+H]^+$  307.1602.  $C_{17}H_{24}ClN_2O^+$ : requires 307.1577.

Amine **44b**{11}

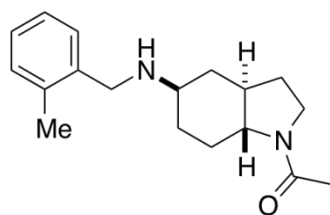

$\delta_{\text{H}}$  (500 MHz,  $\text{CDCl}_3$ ) At ambient temperature, a 2.5:1 mixture of rotamer was observed. Major rotamer: 7.27 (d,  $J = 1.9$  Hz, 1H), 7.20 – 7.12 (m, 3H), 3.79 (s, 2H), 3.58 – 3.38 (m, 2H), 3.05 – 2.89 (m, 2H), 2.73 – 2.60 (m, 1H), 2.40 – 2.31 (m, 3H), 2.16 – 1.98 (m, 3H), 1.93 – 1.83 (m, 1H), 1.68 – 1.07 (m, 7H). Minor rotamer (characteristic signals): 3.91 – 3.82 (m, 1H), 3.31 (td,  $J = 11.6, 6.3$  Hz, 1H), 2.42 (ddd,  $J = 11.2, 7.4, 4.0$  Hz, 1H), 2.07 (s, 3H);  $\delta_{\text{C}}$  (125 MHz,  $\text{CDCl}_3$ ) 170.8, 138.6, 136.3, 130.4, 128.4, 127.1, 126.1, 64.2, 57.0, 49.3, 49.1, 45.0, 36.4, 32.4, 29.7, 29.5, 23.5, 19.1;  $m/z$  (ESI+) found  $[\text{M}+\text{H}]^+$  287.2148.  $\text{C}_{18}\text{H}_{27}\text{N}_2\text{O}^+$ : requires 287.2123.

Amine **44b**{9}

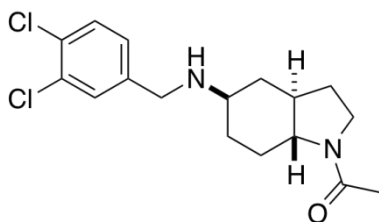

$\delta_{\text{H}}$  (500 MHz,  $\text{CDCl}_3$ ) At ambient temperature, a 2.7:1 mixture of rotamer was observed. Major rotamer: 7.45 (d,  $J = 1.7$  Hz, 1H), 7.42 – 7.34 (m, 1H), 7.17 (dd,  $J = 8.2, 1.8$  Hz, 1H), 3.79 – 3.63 (m, 2H), 3.57 – 3.36 (m, 2H), 3.07 – 2.87 (m, 2H), 2.87 – 2.71 (m, 1H), 2.15 – 1.68 (m, 7H), 1.63 – 1.20 (m, 4H). Minor rotamer (characteristic signals): 3.82 (dd,  $J = 11.8, 8.2$  Hz, 1H), 3.32 – 3.26 (m, 1H), 2.06 (s, 3H);  $\delta_{\text{C}}$  (125 MHz,  $\text{CDCl}_3$ ) Major rotamer: 170.8, 141.5, 132.4, 130.4, 130.0, 127.5, 127.4, 64.4, 51.9, 50.7, 48.6, 39.8, 34.2, 30.0, 29.6, 26.4, 23.5;  $m/z$  (ESI+) found  $[\text{M}+\text{H}]^+$  341.1198.  $\text{C}_{17}\text{H}_{23}\text{Cl}_2\text{N}_2\text{O}^+$ : requires 341.1187.

Amine **44a**{6}

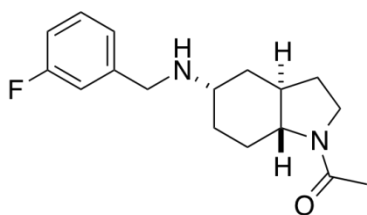

$\delta_{\text{H}}$  (500 MHz,  $\text{CDCl}_3$ ) At ambient temperature, a 2.3:1 mixture of rotamer was observed. Major rotamer: 7.30 – 7.23 (m, 1H), 7.12 – 7.03 (m, 2H), 6.92 (td,  $J = 8.4, 2.4$  Hz, 1H), 3.81 – 3.70 (m, 2H), 3.52 – 3.36 (m, 2H), 3.04 – 2.88 (m, 2H), 2.82 – 2.73 (m, 1H), 2.14 – 1.71 (m, 7H), 1.62 – 1.28 (m, 4H). Minor rotamer (characteristic signals): 3.87 – 3.78 (m, 1H), 3.32 – 3.23 (m, 1H), 2.06 (s, 3H);  $\delta_{\text{C}}$  (125 MHz,  $\text{CDCl}_3$ ) Major rotamer: 170.8, 163.1 (d,  $^1J_{\text{CF}} = 245$  Hz), 143.7, 129.9 (d,  $^3J_{\text{CF}} = 9$  Hz), 123.6 (d,  $^4J_{\text{CF}} =$

3 Hz), 114.9 (d,  $^2J_{\text{cf}} = 21$  Hz), 113.8 (d,  $^2J_{\text{cf}} = 21$  Hz), 64.5, 51.8, 51.2, 48.6, 39.8, 34.2, 30.0, 29.6, 26.3, 23.5;  $m/z$  (ESI+) found  $[M+H]^+$  291.1879.  $\text{C}_{17}\text{H}_{24}\text{FN}_2\text{O}^+$ : requires 291.1873.

Amine **44b**{8}

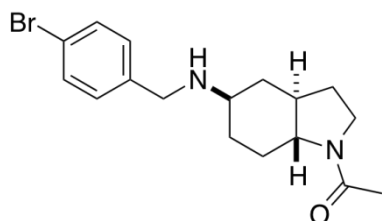

$\delta_{\text{H}}$  (500 MHz,  $\text{CDCl}_3$ ) At ambient temperature, a 2.5:1 mixture of rotamer was observed. Major rotamer: 7.48 – 7.40 (m, 2H), 7.19 (m, 2H), 3.84 – 3.73 (m, 2H), 3.59 – 3.49 (m, 1H), 3.42 (td,  $J = 10.4$ , 6.4 Hz, 1H), 3.04 – 2.92 (m, 2H), 2.69 – 2.53 (m, 1H), 2.26 – 2.13 (m, 1H), 2.13 – 1.97 (m, 4H), 1.95 – 1.81 (m, 1H), 1.66 – 1.04 (m, 5H). Minor rotamer (characteristic signals): 3.89 – 3.79 (m, 1H), 3.28 (td,  $J = 11.7$ , 6.3 Hz, 1H), 2.46 – 2.36 (m, 1H), 2.05 (s, 3H);  $\delta_{\text{C}}$  (125 MHz,  $\text{CDCl}_3$ ) Major rotamer: 170.8, 139.8, 131.6, 129.8, 120.8, 64.1, 56.3, 50.8, 49.1, 45.0, 36.3, 32.3, 29.7, 29.5, 23.5;  $m/z$  (ESI+) found  $[M+H]^+$  351.1075.  $\text{C}_{17}\text{H}_{24}\text{BrN}_2\text{O}^+$ : requires 351.1072.

Amine **44a**{8}

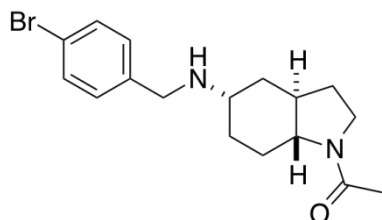

$\delta_{\text{H}}$  (500 MHz,  $\text{CDCl}_3$ ) At ambient temperature, a 2.5:1 mixture of rotamer was observed. Major rotamer: 7.45 – 7.39 (m, 2H), 7.18 (m, 2H), 3.75 – 3.66 (m, 2H), 3.50 – 3.44 (m, 1H), 3.43 – 3.35 (m, 1H), 3.01 – 2.86 (m, 2H), 2.80 – 2.72 (m, 1H), 2.11 – 1.98 (m, 4H), 1.98 – 1.67 (m, 3H), 1.60 – 1.27 (m, 4H). Minor rotamer (characteristic signals): 3.86 – 3.75 (m, 1H), 3.35 – 3.27 (m, 1H), 2.25 – 2.13 (m, 2H), 2.05 (s, 3H);  $\delta_{\text{C}}$  (125 MHz,  $\text{CDCl}_3$ ) Major rotamer: 170.8, 140.1, 131.5, 129.8, 120.6, 64.5, 51.8, 51.1, 48.6, 39.8, 34.2, 30.0, 29.6, 26.3, 23.5;  $m/z$  (ESI+) found  $[M+H]^+$  351.1096.  $\text{C}_{17}\text{H}_{24}\text{BrN}_2\text{O}^+$ : requires 351.1072.

Amine **44b**{15}

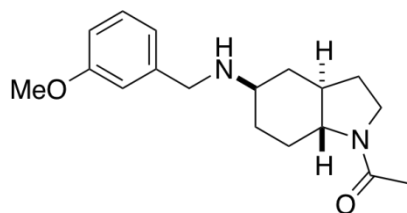



$\delta_{\text{H}}$  (500 MHz,  $\text{CDCl}_3$ ) At ambient temperature, a 2.5:1 mixture of rotamer was observed. Major rotamer: 7.26 – 7.19 (m, 1H), 6.92 – 6.85 (m, 2H), 6.82 – 6.76 (m, 1H), 3.86 – 3.73 (m, 5H), 3.56 – 3.48 (m, 1H), 3.41 (td,  $J = 10.5, 6.4$  Hz, 1H), 3.03 – 2.91 (m, 2H), 2.70 – 2.57 (m, 1H), 2.28 – 2.14 (m, 1H), 2.12 – 1.96 (m, 4H), 1.91 – 1.80 (m, 1H), 1.74 – 1.36 (m, 3H), 1.35 – 1.04 (m, 2H). Minor rotamer (characteristic signals): 3.29 (td,  $J = 11.7, 6.3$  Hz, 1H), 2.46 – 2.37 (m, 1H), 2.06 (s, 2H);  $\delta_{\text{C}}$  (125 MHz,  $\text{CDCl}_3$ ) Major rotamer: 170.8, 159.9, 142.3, 129.6, 120.4, 113.7, 112.5, 64.1, 56.3, 55.3, 51.4, 49.1, 45.0, 36.3, 32.3, 29.7, 29.5, 23.5;  $m/z$  (ESI+) found  $[\text{M}+\text{H}]^+$  303.2091.  $\text{C}_{18}\text{H}_{27}\text{N}_2\text{O}_2^+$ : requires 303.2073.

Amine **44a**{15}

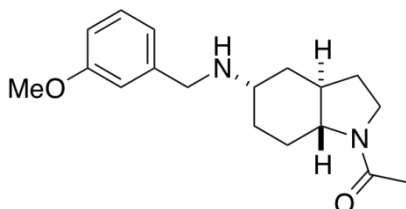

$\delta_{\text{H}}$  (500 MHz,  $\text{CDCl}_3$ ) At ambient temperature, a 2.5:1 mixture of rotamer was observed. Major rotamer: 7.25 – 7.20 (m, 1H), 6.91 – 6.85 (m, 2H), 6.80 – 6.74 (m, 1H), 3.79 (s, 3H), 3.73 (s, 2H), 3.50 – 3.33 (m, 2H), 3.04 – 2.85 (m, 2H), 2.80 – 2.70 (m, 1H), 2.14 – 1.71 (m, 6H), 1.59 – 1.25 (m, 5H). Minor rotamer (characteristic signals): 3.27 (td,  $J = 11.6, 6.3$  Hz, 1H), 2.05 (s, 3H);  $\delta_{\text{C}}$  (125 MHz,  $\text{CDCl}_3$ ) Major rotamer: 170.8, 159.8, 142.7, 129.4, 120.4, 113.8, 112.1, 64.5, 55.3, 51.7, 51.6, 48.6, 39.8, 34.2, 30.0, 29.6, 26.4, 23.5;  $m/z$  (ESI+) found  $[\text{M}+\text{H}]^+$  303.2075.  $\text{C}_{18}\text{H}_{27}\text{N}_2\text{O}_2^+$ : requires 303.2073.

Amine **44a**{14}

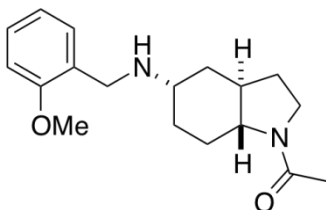

$\delta_{\text{H}}$  (500 MHz,  $\text{CDCl}_3$ ) At ambient temperature, a 2.3:1 mixture of rotamer was observed. Major rotamer: 7.25 – 7.19 (m, 1H), 6.94 – 6.81 (m, 3H), 3.89 – 3.79 (s, 3H), 3.75 (s, 2H), 3.52 – 3.33 (m, 2H), 2.98 – 2.86 (m, 2H), 2.80 – 2.70 (m, 1H), 2.14 – 1.94 (m, 5H), 1.93 – 1.70 (m, 2H), 1.59 – 1.27 (m, 4H). Minor rotamer (characteristic signals): 3.27 (td,  $J = 11.6, 6.2$  Hz, 1H), 2.20 (ddd,  $J = 15.0, 10.0, 3.2$  Hz, 2H), 2.05 (s, 3H);  $\delta_{\text{C}}$  (125 MHz,  $\text{CDCl}_3$ ) Major rotamer: 170.7, 157.7, 129.9, 128.2, 120.5, 110.4, 64.5, 55.4, 51.2, 48.7, 47.1, 39.9, 34.2, 30.1, 29.6, 26.6, 23.6;  $m/z$  (ESI+) found  $[\text{M}+\text{H}]^+$  303.2083.  $\text{C}_{18}\text{H}_{27}\text{N}_2\text{O}_2^+$ : requires 303.2073.

Amine **44a**{16}

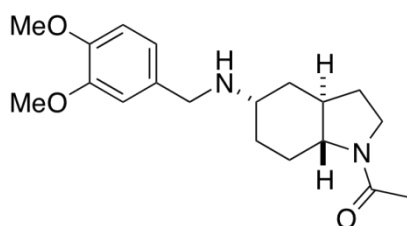

$\delta_{\text{H}}$  (500 MHz, CDCl<sub>3</sub>) At ambient temperature, a 2.6:1 mixture of rotamer was observed. Major rotamer: 6.88 – 6.77 (m, 3H), 3.86 (m, 6H), 3.72 – 3.63 (m, 2H), 3.51 – 3.32 (m, 2H), 3.02 – 2.86 (m, 2H), 2.82 – 2.70 (m, 1H), 2.11 – 1.69 (m, 7H), 1.58 – 1.26 (m, 4H). Minor rotamer (characteristic signals): 3.26 (td,  $J = 11.7, 6.3$  Hz, 1H), 2.25 – 2.13 (m, 2H), 2.04 (s, 3H);  $\delta_{\text{C}}$  (125 MHz, CDCl<sub>3</sub>) Major rotamer: 170.8, 149.0, 148.0, 133.6, 120.1, 111.4, 111.1, 64.5, 56.1, 56.0, 51.7, 51.6, 48.6, 39.8, 34.3, 30.0, 29.5, 26.4, 23.5;  $m/z$  (ESI+) found  $[M+H]^+$  333.2188. C<sub>19</sub>H<sub>29</sub>N<sub>2</sub>O<sub>3</sub><sup>+</sup>: requires 333.2178.

Amine **44a**{11}

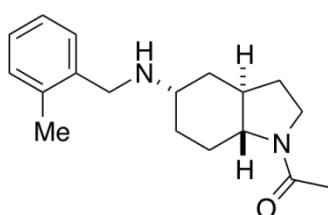

$\delta_{\text{H}}$  (500 MHz, CDCl<sub>3</sub>) At ambient temperature, a 2.3:1 mixture of rotamer was observed. Major rotamer: 7.31 – 7.26 (m, 1H), 7.19 – 7.11 (m, 3H), 3.77 – 3.66 (m, 2H), 3.53 – 3.32 (m, 2H), 3.09 – 2.99 (m, 1H), 2.97 – 2.87 (m, 1H), 2.82 – 2.73 (m, 1H), 2.36 (s, 3H), 2.16 – 1.72 (m, 7H), 1.64 – 1.31 (m, 4H). Minor rotamer (characteristic signals): 3.82 (dd,  $J = 11.9, 8.2$  Hz, 1H), 3.27 (td,  $J = 11.7, 6.3$  Hz, 1H), 2.07 (s, 3H);  $\delta_{\text{C}}$  (125 MHz, CDCl<sub>3</sub>) Major rotamer: 170.8, 138.9, 136.6, 130.4, 128.7, 127.1, 126.0, 64.6, 52.6, 50.0, 48.7, 39.9, 34.6, 30.0, 29.7, 26.5, 23.6, 19.1;  $m/z$  (ESI+) found  $[M+H]^+$  287.2129. C<sub>18</sub>H<sub>27</sub>N<sub>2</sub>O<sup>+</sup>: requires 287.2123.

Amine **44b**{19}

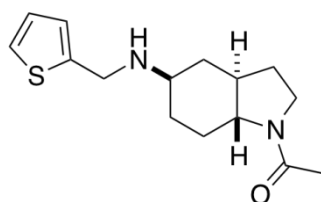

$\delta_{\text{H}}$  (500 MHz, CDCl<sub>3</sub>) At ambient temperature, a 2.5:1 mixture of rotamer was observed. Major rotamer: 7.23 – 7.17 (m, 1H), 6.98 – 6.87 (m, 2H), 4.02 (s, 2H), 3.59 – 3.35 (m, 2H), 3.06 – 2.89 (m, 2H), 2.76 – 2.56 (m, 1H), 2.27 – 1.94 (m, 4H), 1.93 – 1.80 (m, 1H), 1.68 – 1.00 (m, 6H). Minor rotamer (characteristic signals): 3.84 (dd,  $J = 11.8, 8.2$  Hz, 1H), 3.29 (td,  $J = 11.7, 6.3$  Hz, 1H), 2.45 – 2.37 (m, 1H), 2.05 (s, 3H);  $\delta_{\text{C}}$  (125 MHz, CDCl<sub>3</sub>) Major rotamer: 170.8, 144.5, 126.8, 124.8, 124.4, 64.1, 55.9, 49.1, 45.9, 45.0, 36.2, 32.2, 29.7, 29.5, 23.5;  $m/z$  (ESI+) found  $[M+H]^+$  279.1556. C<sub>15</sub>H<sub>23</sub>N<sub>2</sub>OS<sup>+</sup>: requires 279.1531.

Amine **44b**{21}

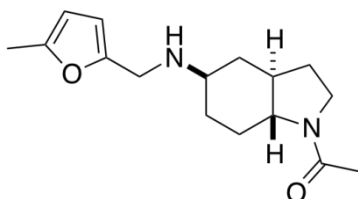

$\delta_{\text{H}}$  (500 MHz,  $\text{CDCl}_3$ ) At ambient temperature, a 2.6:1 mixture of rotamer was observed. Major rotamer: 6.02 (s, 1H), 5.86 (s, 1H), 3.74 (s, 2H), 3.57 – 3.48 (m, 1H), 3.41 (td,  $J = 10.5, 6.4$  Hz, 1H), 3.03 – 2.89 (m, 2H), 2.71 – 2.49 (m, 1H), 2.26 (s, 3H), 2.11 – 1.95 (m, 4H), 1.94 – 1.77 (m, 2H), 1.77 – 1.04 (m, 6H). Minor rotamer (characteristic signals): 3.84 (dd,  $J = 11.9, 8.2$  Hz, 1H), 3.29 (td,  $J = 11.7, 6.3$  Hz, 1H), 2.45 – 2.36 (m, 1H), 2.05 (s, 3H);  $\delta_{\text{C}}$  (125 MHz,  $\text{CDCl}_3$ ) Major rotamer: 170.8, 152.1, 151.6, 107.7, 106.0, 64.1, 55.9, 49.1, 44.9, 43.9, 36.0, 32.0, 29.7, 29.4, 23.5, 13.7;  $m/z$  (ESI+) found  $[\text{M}+\text{H}]^+$  277.1955.  $\text{C}_{16}\text{H}_{25}\text{N}_2\text{O}_2^+$ : requires 277.1916.

Amine **44a**{23}

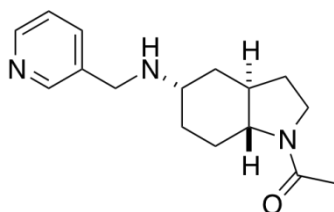

$\delta_{\text{H}}$  (500 MHz,  $\text{CDCl}_3$ ) At ambient temperature, a 3:1 mixture of rotamer was observed. Major rotamer: 8.53 (s, 1H), 8.50 – 8.39 (m, 1H), 7.74 – 7.57 (m, 1H), 7.26 – 7.17 (m, 1H), 3.81 – 3.69 (m, 2H), 3.53 – 3.32 (m, 2H), 3.04 – 2.83 (m, 2H), 2.80 – 2.68 (m, 1H), 2.12 – 1.67 (m, 7H), 1.59 – 1.28 (m, 4H). Minor rotamer (characteristic signals): 3.25 (td,  $J = 11.6, 6.3$  Hz, 1H), 2.03 (s, 3H);  $\delta_{\text{C}}$  (125 MHz,  $\text{CDCl}_3$ ) Major rotamer: 170.8, 149.6, 148.4, 136.3, 135.8, 123.4, 64.4, 51.9, 49.1, 48.6, 39.7, 34.1, 29.9, 29.5, 26.3, 23.5;  $m/z$  (ESI+) found  $[\text{M}+\text{H}]^+$  274.1931.  $\text{C}_{16}\text{H}_{24}\text{N}_3\text{O}^+$ : requires 274.1919.

#### IV. Supplementary Note: Cheminformatic analysis

##### Principal Component Analysis

The plots shown in **Fig 6a-c** were generated from principal component analysis (PCA) of a total of 183 compounds:

- Tan's established reference set consisting of 40 small molecule drugs, 20 drug-like compounds from commercial vendors (ChemBridge and Chem Div) and 60 diverse natural products (**Suppl. Table 3**),<sup>47</sup>
- 20 alkaloid natural products (**Suppl. Fig. 1**),
- 14 representative scaffolds (**Suppl. Fig. 2**),
- 29 representative library members (**Suppl. Fig. 3**).

The 20 structural and physiochemical properties (**Supplementary Table 4**) introduced by Tan<sup>47</sup> were determined by SYBYL<sup>67</sup>, free online cheminformatic tools (VCC Lab<sup>6869</sup>), ChemDraw and manual inspection. For a discussion on the relevance of the 20 selected parameters, see Tan's earlier paper.<sup>47</sup> This property data for all the compounds was assembled in a Microsoft Excel spreadsheet (*Supplementary Dataset 1 PCA.xls*). The mean average value for each parameter was calculated for each compound series (**Supplementary Table 5**). This hypothetical average structure for each series was also included in the PCA analysis.

**Supplementary Table 4. Parameters employed in PCA.**

| Parameter | Description                                      | Method of Determination                                   |
|-----------|--------------------------------------------------|-----------------------------------------------------------|
| MW        | molecular weight                                 | SYBYL                                                     |
| N         | number of nitrogen atoms                         | SYBYL                                                     |
| O         | number of oxygen atoms                           | SYBYL                                                     |
| XLogP     | calc n-octanol/water partition coefficient       | <a href="http://www.vcclab.org">http://www.vcclab.org</a> |
| HBD       | number of hydrogen bond donors                   | SYBYL                                                     |
| HBA       | number of hydrogen bond acceptors                | SYBYL                                                     |
| RotB      | number of rotatable bonds                        | SYBYL                                                     |
| tPSA      | topological polar surface area                   | SYBYL                                                     |
| nStereo   | number of stereocenters                          | SYBYL                                                     |
| R         | number of R stereocentres                        | ChemDraw Show Stereochemistry                             |
| S         | number of S stereocentres                        | ChemDraw Show Stereochemistry                             |
| nStMW     | $R - S$                                          | Microsoft Excel                                           |
| RSdelta   | $nStereo / MW$ (stereochemical density)          | Microsoft Excel                                           |
| Rings     | number of rings                                  | Manual inspection                                         |
| RngAr     | number of aromatic rings                         | Manual inspection                                         |
| RngSys    | number of ring systems                           | Manual inspection                                         |
| RngLg     | number of atoms in largest ring outline          | Manual inspection                                         |
| RRSys     | $Rings / RngSys$ (ring complexity)               | Microsoft Excel                                           |
| ALOGPs    | calc n-octanol/water partition coefficient (alt) | <a href="http://www.vcclab.org">http://www.vcclab.org</a> |
| ALOGpS    | calc aqueous solubility                          | <a href="http://www.vcclab.org">http://www.vcclab.org</a> |

**Supplementary Table 5. Average parameters by compound series.**

|                | Drugs | NPs  | Commercial | Alkaloid NPs | Scaffolds | Libraries |
|----------------|-------|------|------------|--------------|-----------|-----------|
| <b>m/w</b>     | 361   | 629  | 414        | 319          | 243       | 355       |
| <b>N</b>       | 2.2   | 2.6  | 4.5        | 1.7          | 0.9       | 1.9       |
| <b>O</b>       | 2.9   | 9.7  | 3.3        | 2.8          | 1.6       | 1.8       |
| <b>XlogP</b>   | 2.7   | 1.5  | 2.4        | 2.0          | 2.3       | 4.0       |
| <b>HBD</b>     | 1.5   | 4.9  | 1.5        | 1.3          | 0.7       | 0.8       |
| <b>HBA</b>     | 5.4   | 10.8 | 6.8        | 4.4          | 2.5       | 4.3       |
| <b>RotB</b>    | 6.3   | 9.7  | 5.7        | 2.8          | 1.7       | 4.1       |
| <b>tPSA</b>    | 69    | 183  | 98         | 54           | 33        | 42        |
| <b>ALOGPs</b>  | 2.8   | 2.1  | 3.0        | 2.3          | 2.4       | 4.0       |
| <b>ALOGpS</b>  | -3.9  | -3.8 | -3.9       | -2.7         | -2.5      | -4.5      |
| <b>nStereo</b> | 1.4   | 9.1  | 0.5        | 4.0          | 3.1       | 3.3       |
| <b>R</b>       | 0.6   | 4.1  | 0.3        | 1.7          | 1.6       | 1.6       |
| <b>S</b>       | 0.8   | 5.0  | 0.3        | 2.3          | 1.6       | 1.6       |
| <b>nStMW*</b>  | 3.7   | 13.9 | 1.1        | 12.7         | 13.5      | 9.4       |
| <b>RSdelta</b> | -0.2  | -0.9 | 0.0        | -0.6         | 0.0       | 0.0       |
| <b>Rings</b>   | 2.9   | 3.8  | 3.7        | 3.9          | 3.0       | 3.8       |
| <b>RngAr</b>   | 2.1   | 1.0  | 2.9        | 0.9          | 0.5       | 1.1       |
| <b>RngSys</b>  | 2.1   | 2.0  | 3.1        | 1.4          | 1.5       | 2.0       |
| <b>RngLg</b>   | 8.4   | 15.8 | 7.9        | 13.4         | 10.9      | 11.9      |
| <b>RRSys</b>   | 1.4   | 2.3  | 1.2        | 3.2          | 2.2       | 2.1       |

\*nStMW x 1000

Principal component analysis was then carried out using the procedure outlined by Tan.<sup>47</sup> This resulted in the construction of 3 plots of PC1 v PC2, PC1 v PC3 and PC2 v PC3 (**Supplementary Fig. 1a-c**). Summary information from R (the open source statistical computing package<sup>70</sup> used for the PCA analysis) is shown below in **Supplementary Table 6**.

**Supplementary Table 6. Standard deviation and proportion of variance for each component in PCA plot (R Summary).**

|                               | PC1   | PC2   | PC3   | PC4   | PC5   | PC6   | PC7   | PC8   | PC9   | PC10  |
|-------------------------------|-------|-------|-------|-------|-------|-------|-------|-------|-------|-------|
| <b>Standard deviation</b>     | 2.871 | 1.856 | 1.747 | 1.384 | 1.094 | 0.844 | 0.575 | 0.568 | 0.468 | 0.374 |
| <b>Proportion of Variance</b> | 0.412 | 0.172 | 0.153 | 0.096 | 0.060 | 0.036 | 0.017 | 0.016 | 0.011 | 0.007 |
| <b>Cumulative Proportion</b>  | 0.412 | 0.584 | 0.737 | 0.833 | 0.893 | 0.928 | 0.945 | 0.961 | 0.972 | 0.979 |

This data shows that of the 20-dimensional dataset, >90% of the variance is accounted for within the first 6 principal components (PC1 – PC6). In order to simplify the interpretation of this data, the first 3 principal components (accounting for ~74% of the variation) were used to generate the PCA plots shown in **Fig. 6a-c**.

The R program was used to plot the weightings of the original 20 parameters for each of the three 2-dimensional PCA plots (**Supplementary Fig. 8**). The parameters that have the greatest influence on PC1 are MW, O, HBA and tPSA, which move compounds to the right for plots PC1 v PC2 and PC1 v PC3. The descriptors with the largest loading on PC2 are N, RingAr and RingSys, which shift compounds up in plots PC1 v PC2 and PC2 v PC3, as well as nStMW, which shifts compounds down in these plots. Finally, PC3 is affected to the greatest degree by XLogP, Rings and ALOGPs, shifting compounds in a negative direction along the PC3 axis in plots PC1 v PC3 and PC2 v PC3, in addition to ALOGpS, which shifts compounds in a positive direction in these plots.

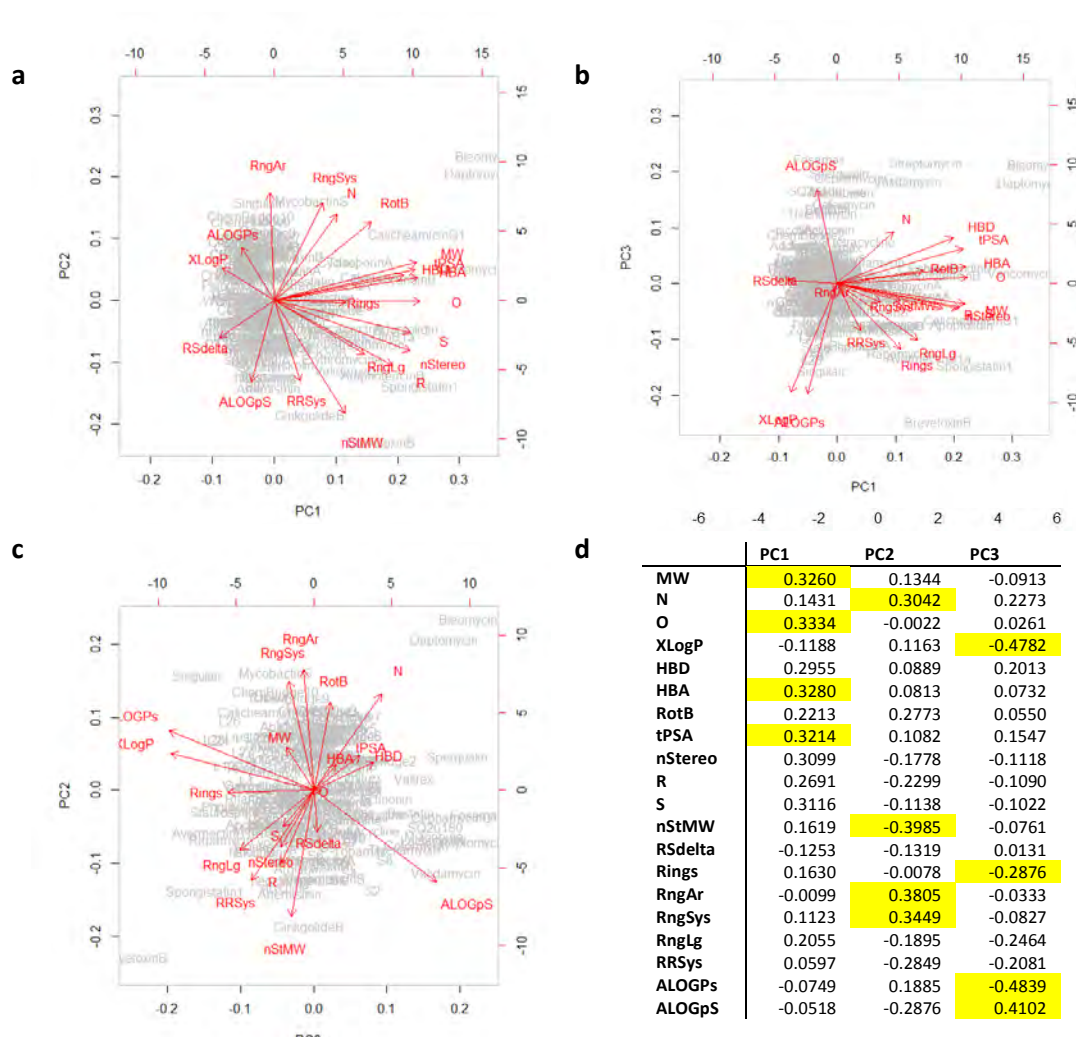

**Supplementary Figure 8. Biplots and component loadings for PCA of alkaloid-inspired scaffolds and libraries, and reference sets.** The biplots for (a) PC1 v PC2. (b) PC1 v PC3. (c) PC2 v PC3. (d) Component loadings of each of the 20 structural and physiochemical descriptors for the first 3 principal components (PC1 – PC3). The four descriptors with the highest weightings are highlighted for each principal component.

### Principal Moment of Inertia Analysis

Principal moment of inertia analysis was carried out by calculation of the lowest energy conformation of each representative scaffold and library compound, and each compound from the above reference set. The conformation calculation was performed using the MOE molecular modelling software package<sup>7172</sup> in a similar manner to that reported by Tan<sup>73</sup>, with the only difference being the selection of parameters employed for conformation generation:

- maxConfs: 1000

- RMSD:  $\leq 0.15$
- Failure limit: 100
- Energy cutoff: 7 kcal/mol
- Iteration limit: 1000
- MM iteration limit: 500

Once the lowest energy conformer was calculated, the three principal moments of inertia ( $I_{xx}$ ,  $I_{yy}$ ,  $I_{zz}$ ) and normalized principal moments of inertia,  $npr1$  ( $I_{xx}/I_{zz}$ ) and  $npr2$  ( $I_{yy}/I_{zz}$ ) were determined using MOE. These PMI ratios were calculated for our representative scaffolds and library members, in addition to the reference sets<sup>47</sup> of alkaloids, drugs, commercial drug-like library compounds and natural products. The ratios were plotted on a triangular graph where the vertices (0,1), (0.5,0.5) and (1,1) represent a perfect rod, disc and sphere, respectively (**Fig. 6d**).<sup>74</sup>



V. Supplementary Note: <sup>1</sup>H and <sup>13</sup>C NMR spectra for intermediates, scaffolds and representative library compounds

Stemona alkaloid-inspired series

S1c

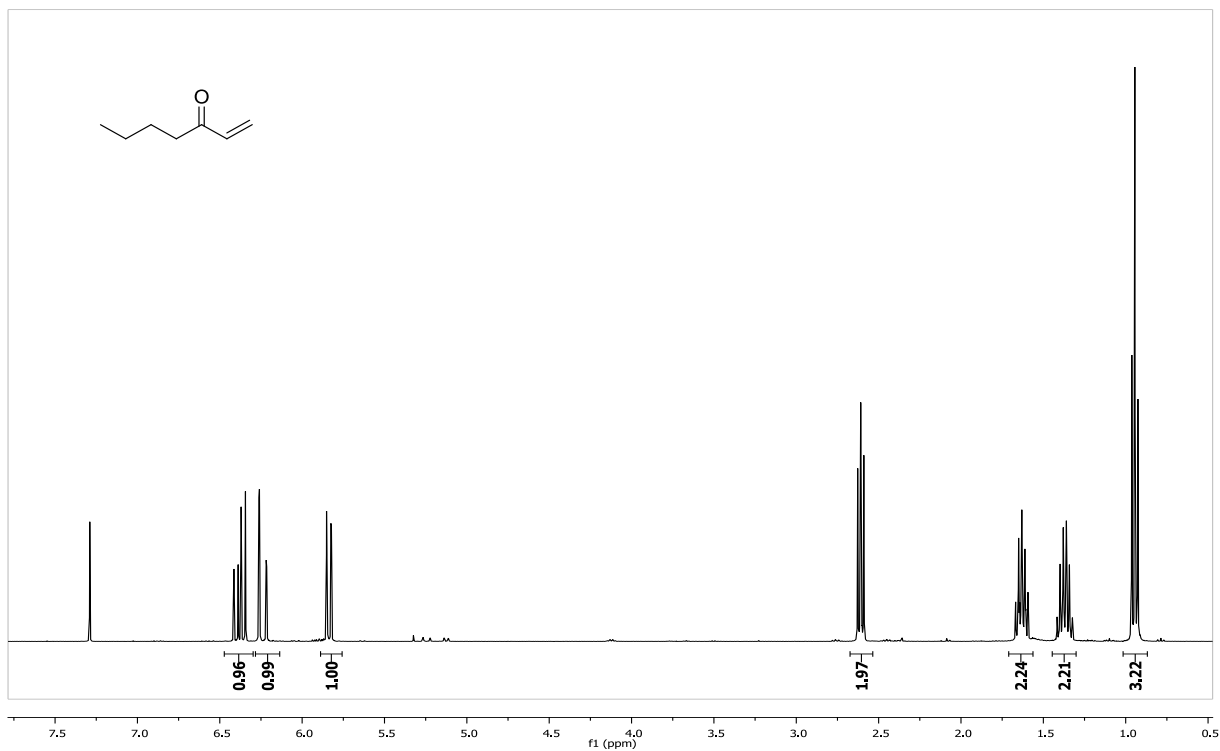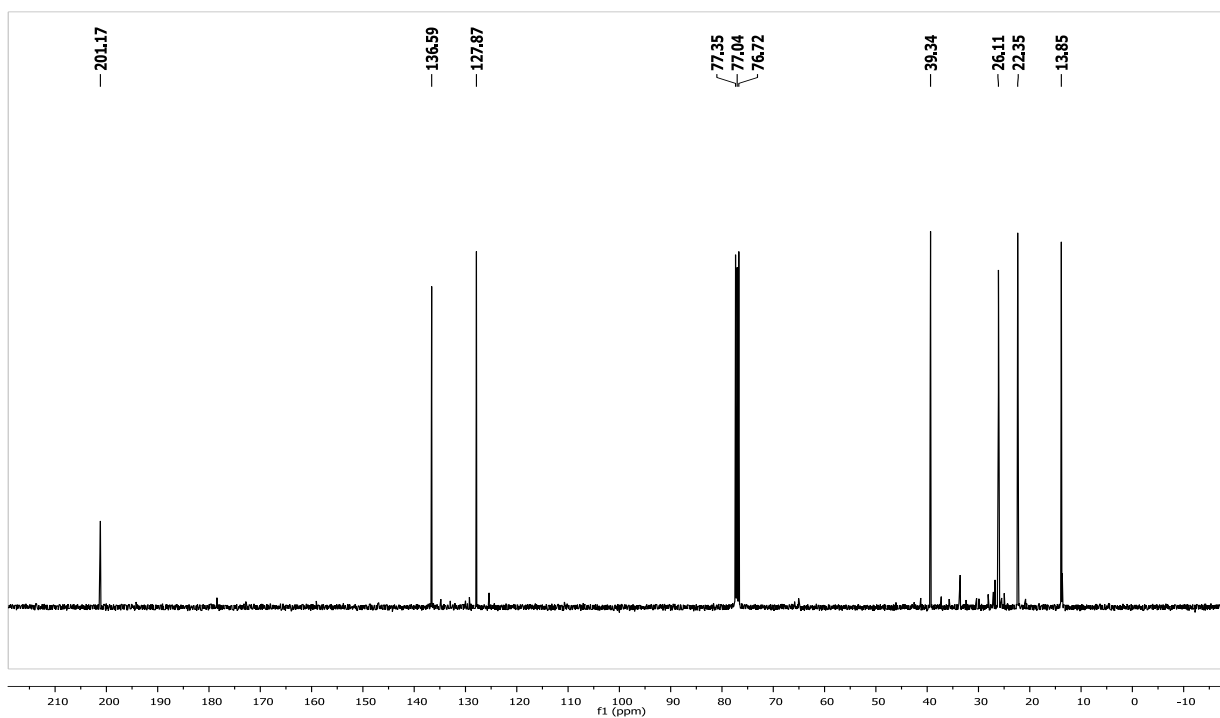

S1d

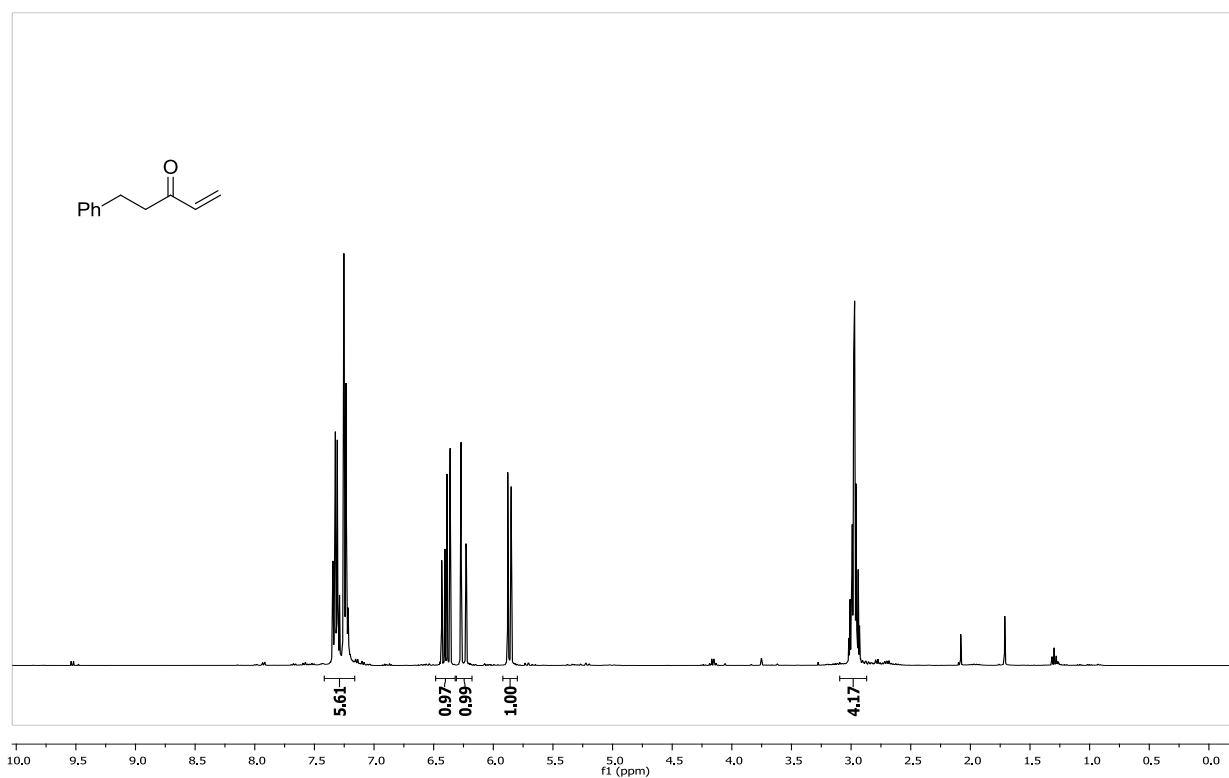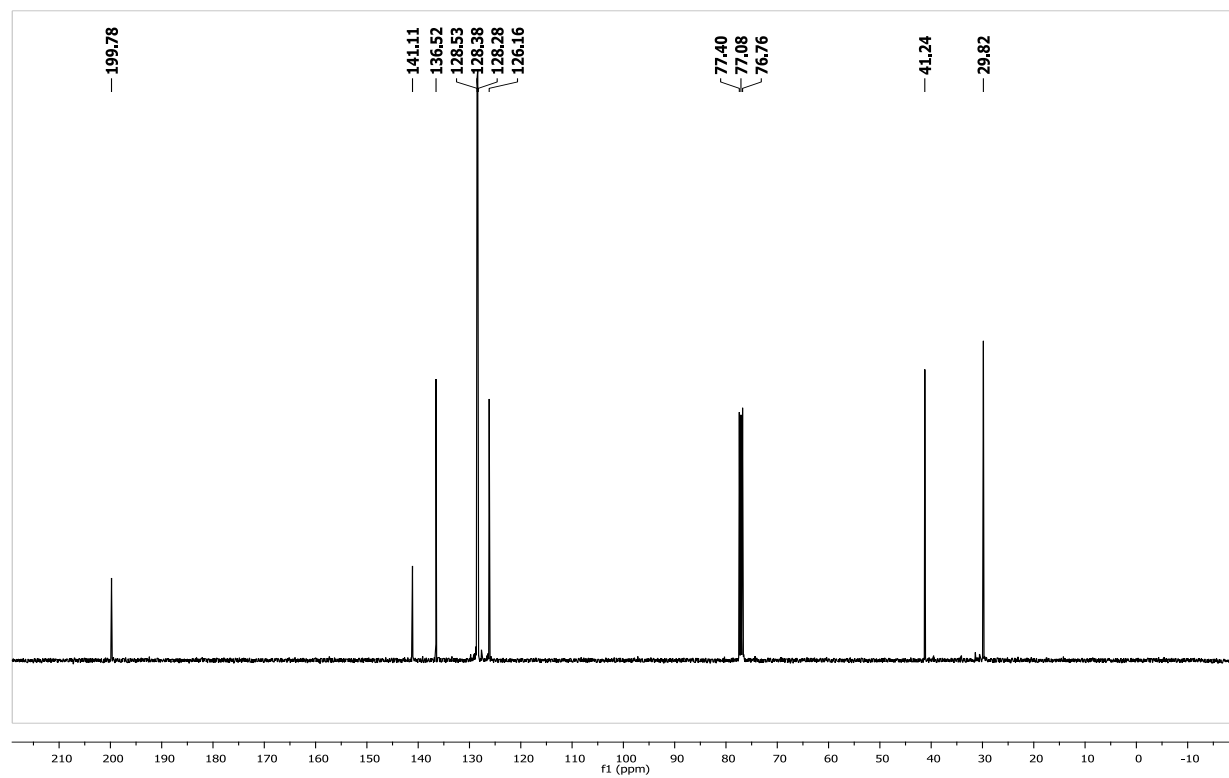

S2c

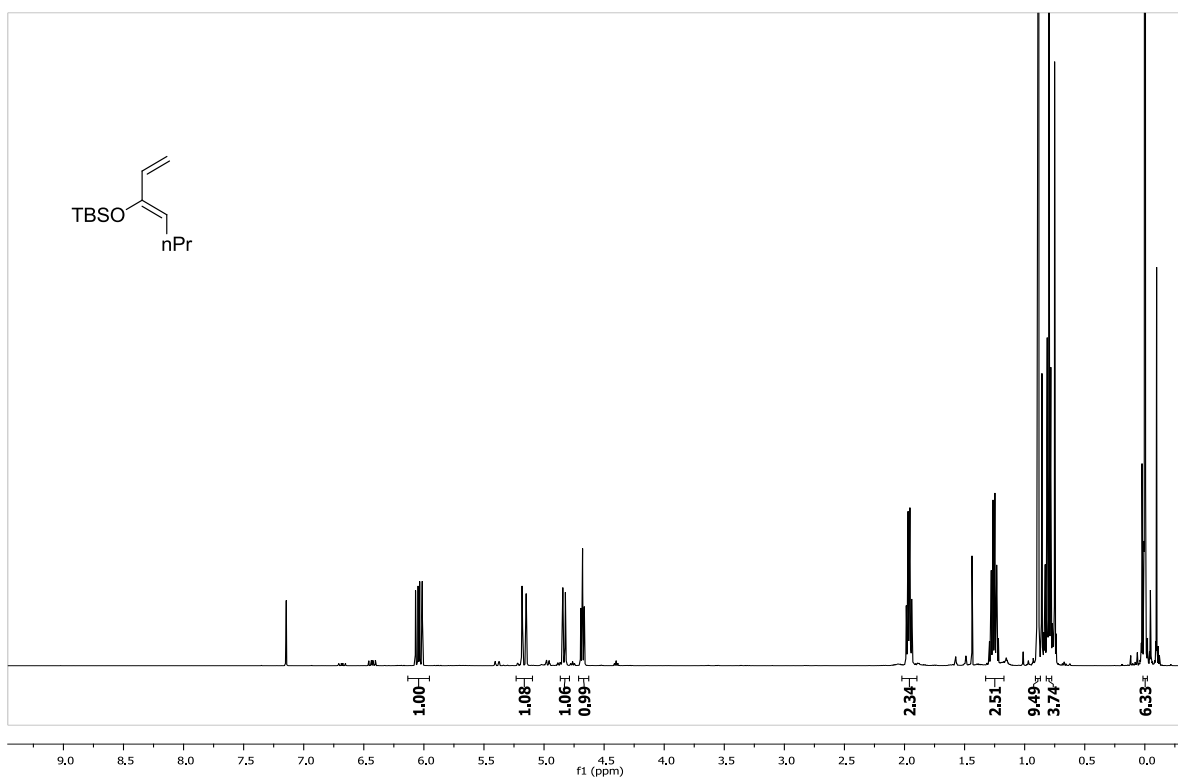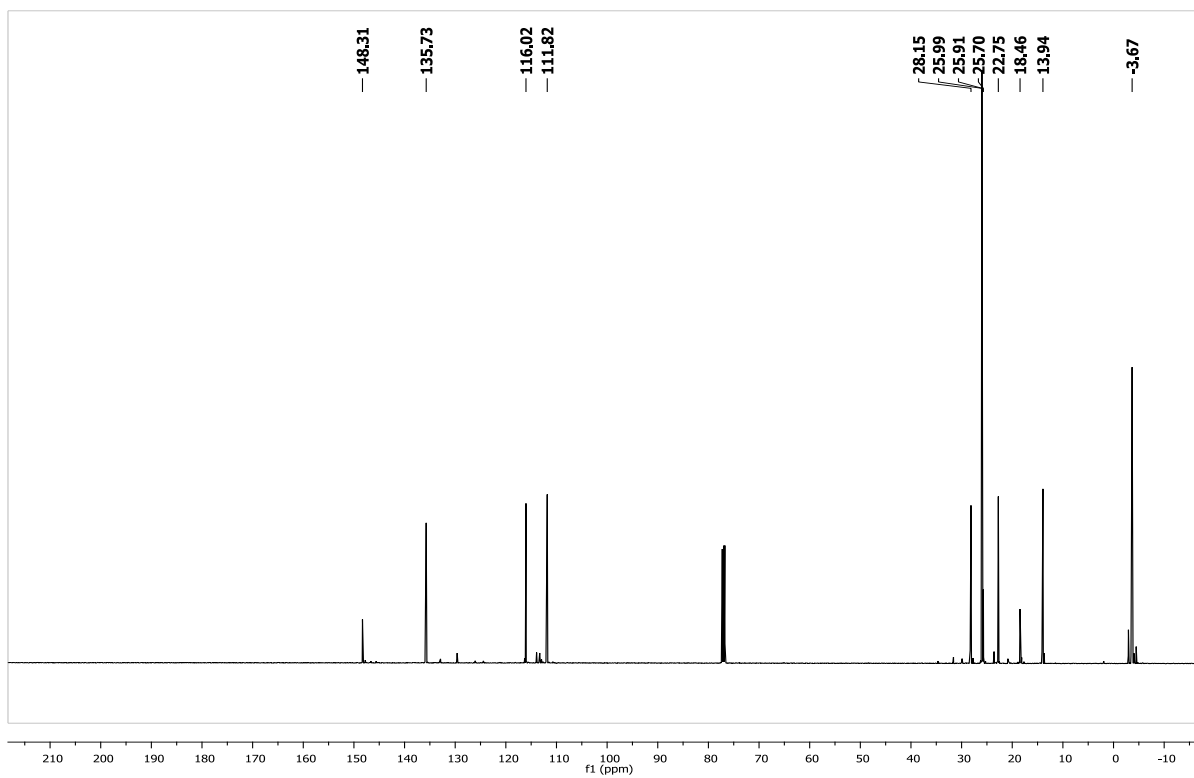

S2d

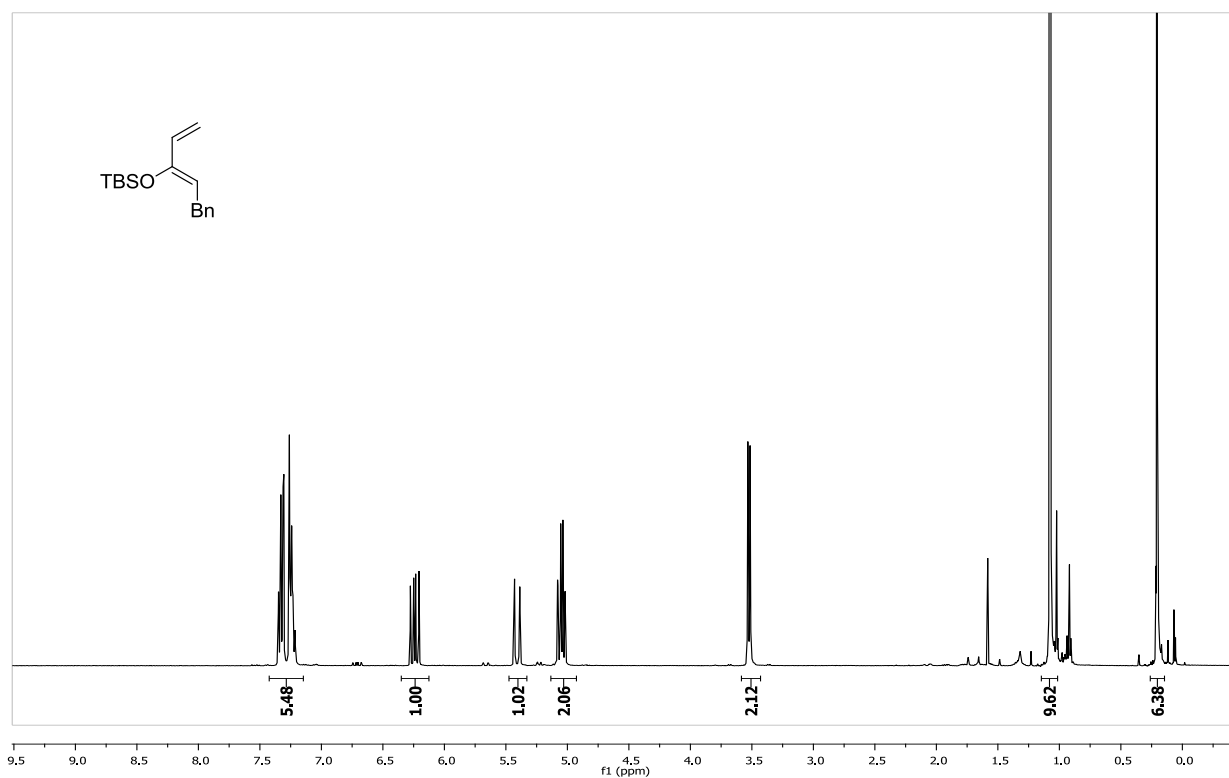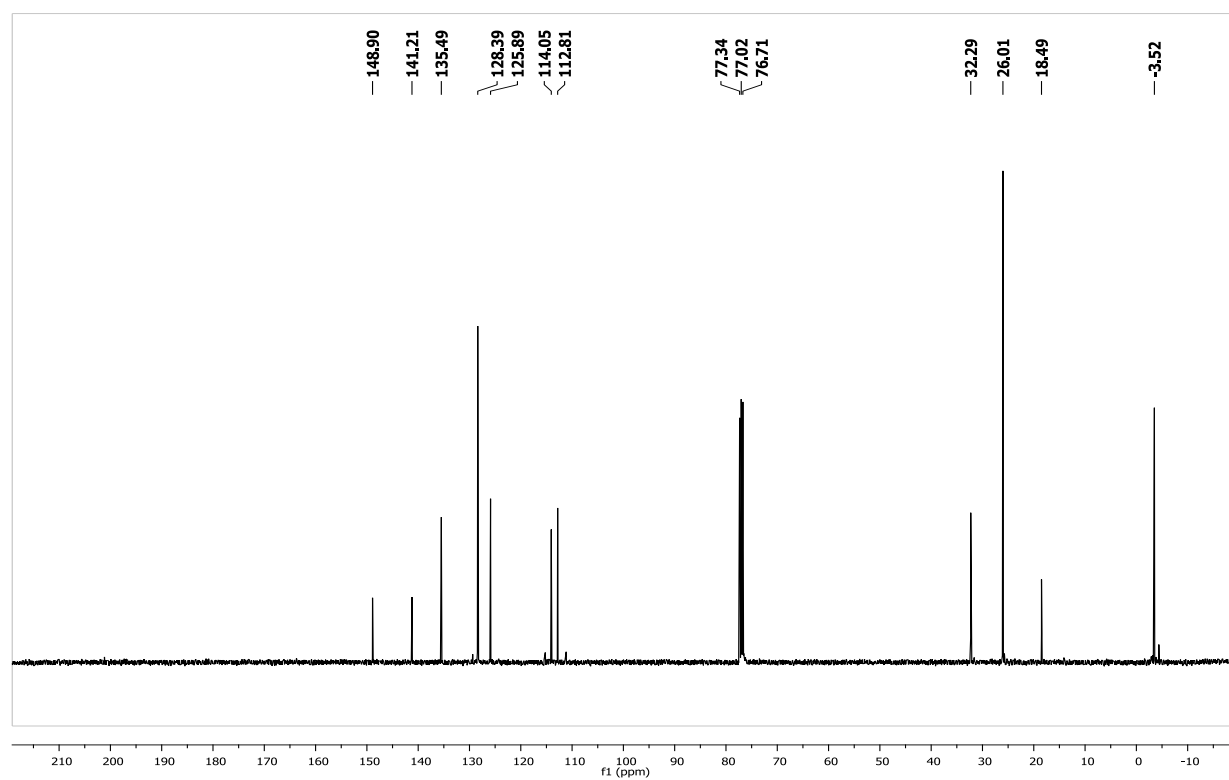

3b

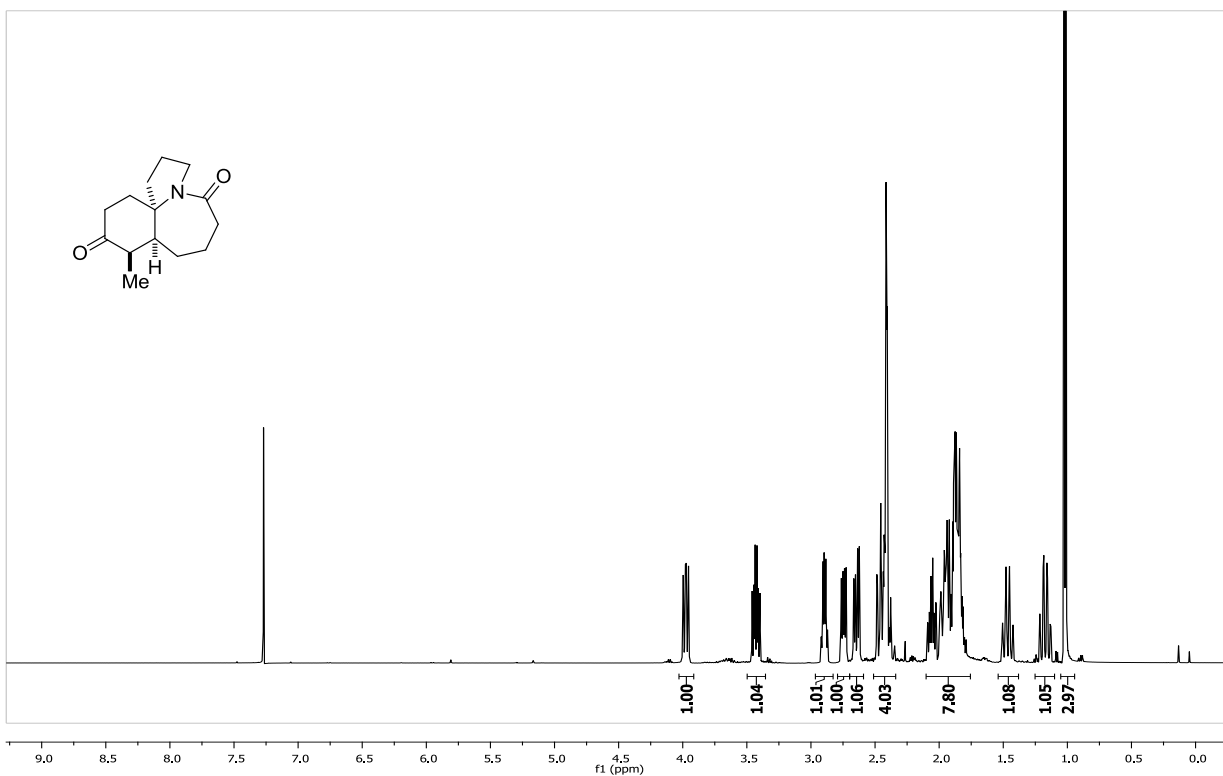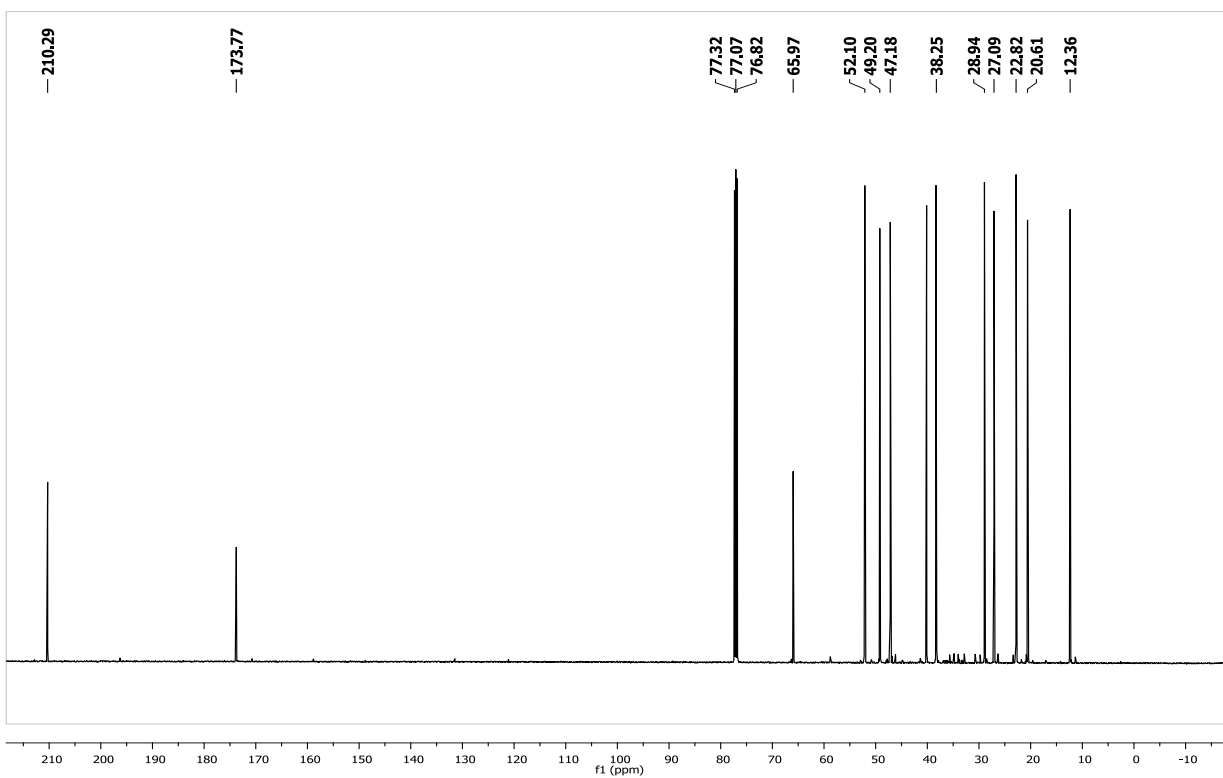

3c

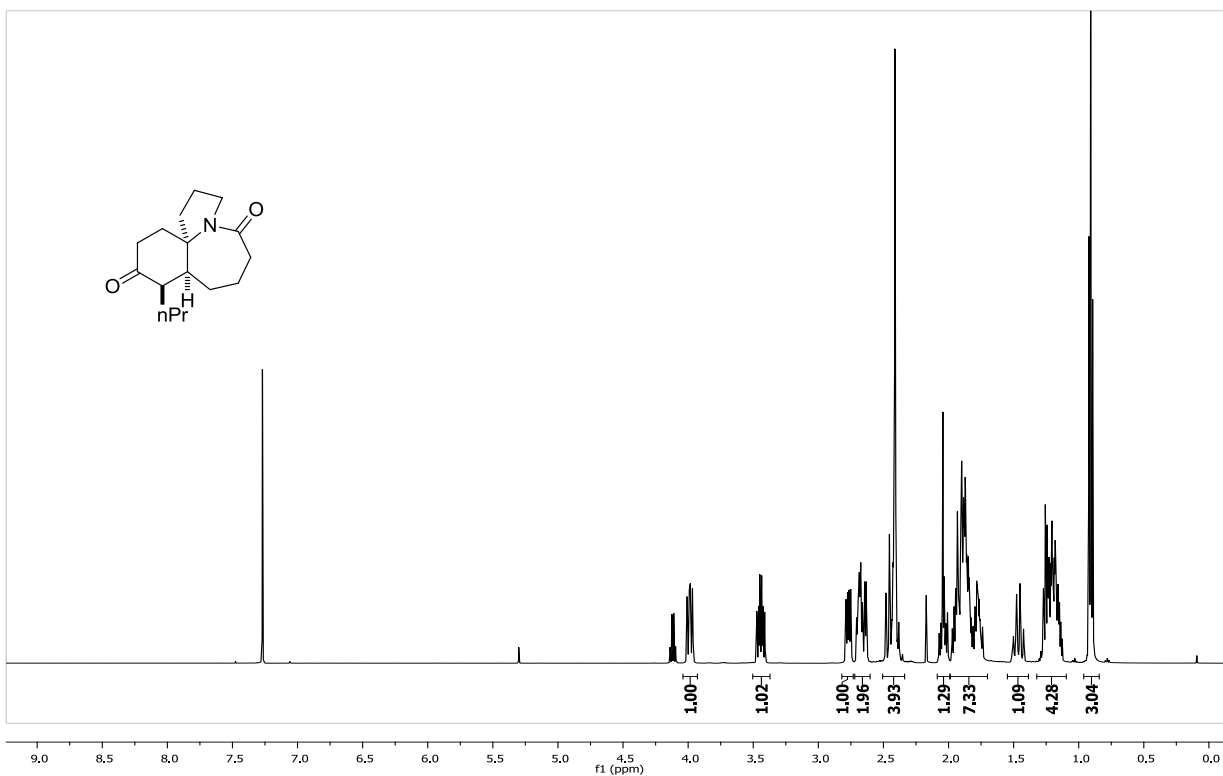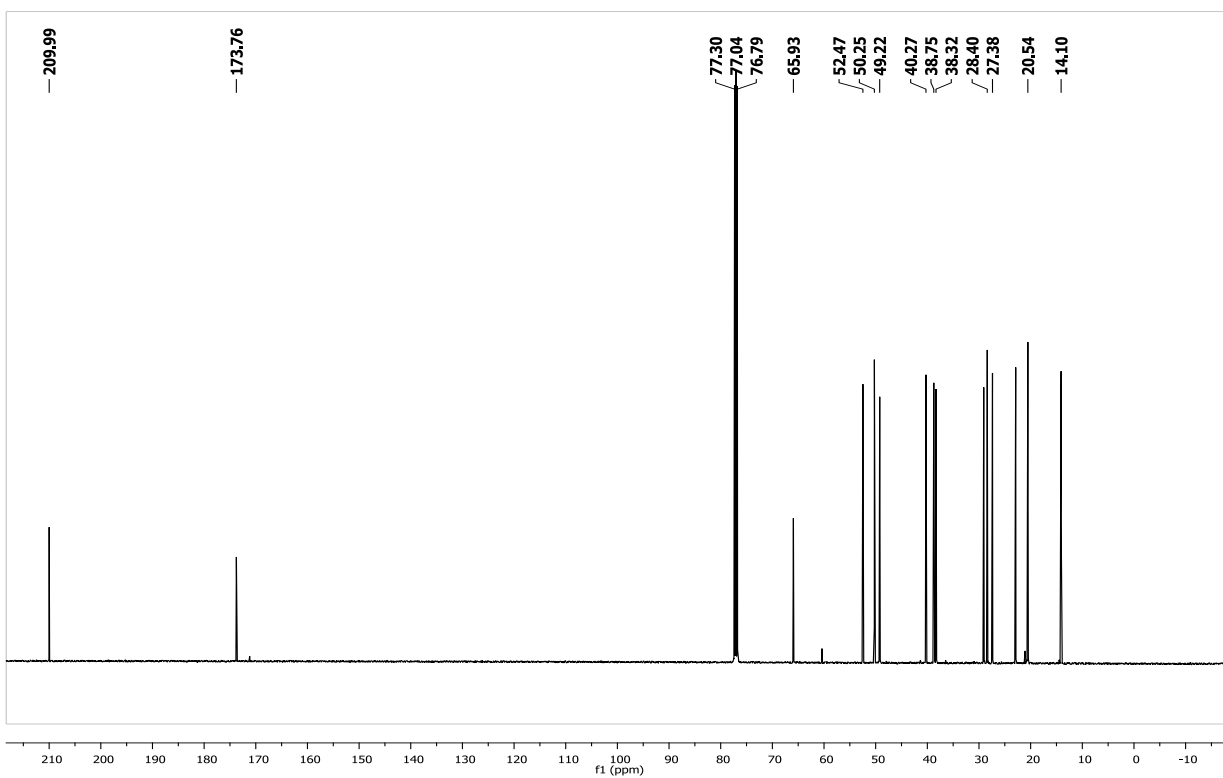

3d

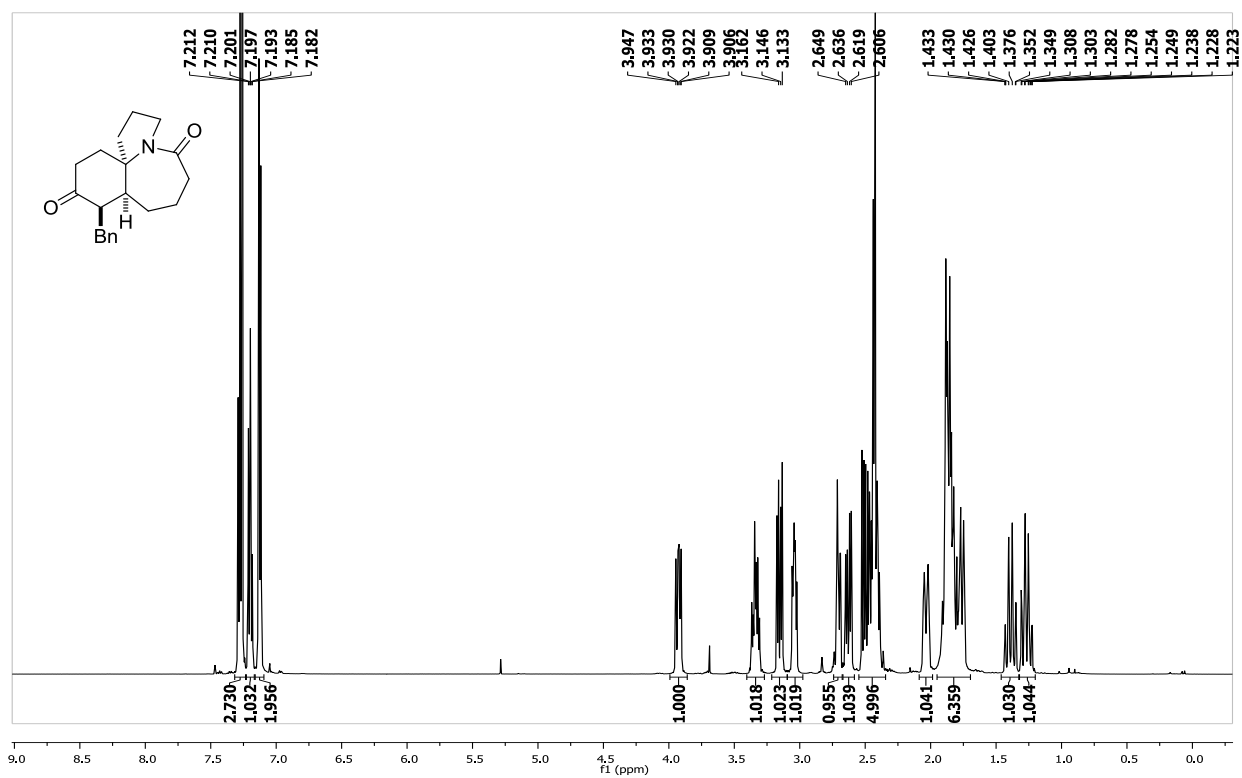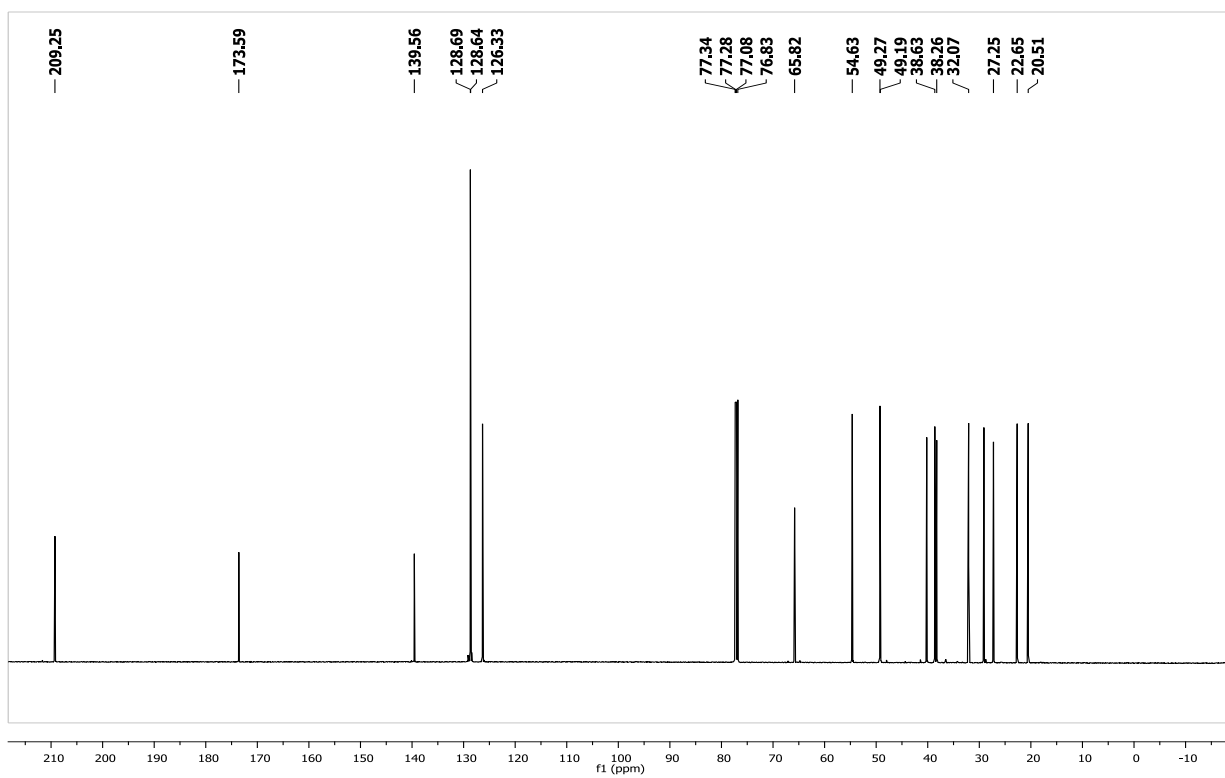

S3a

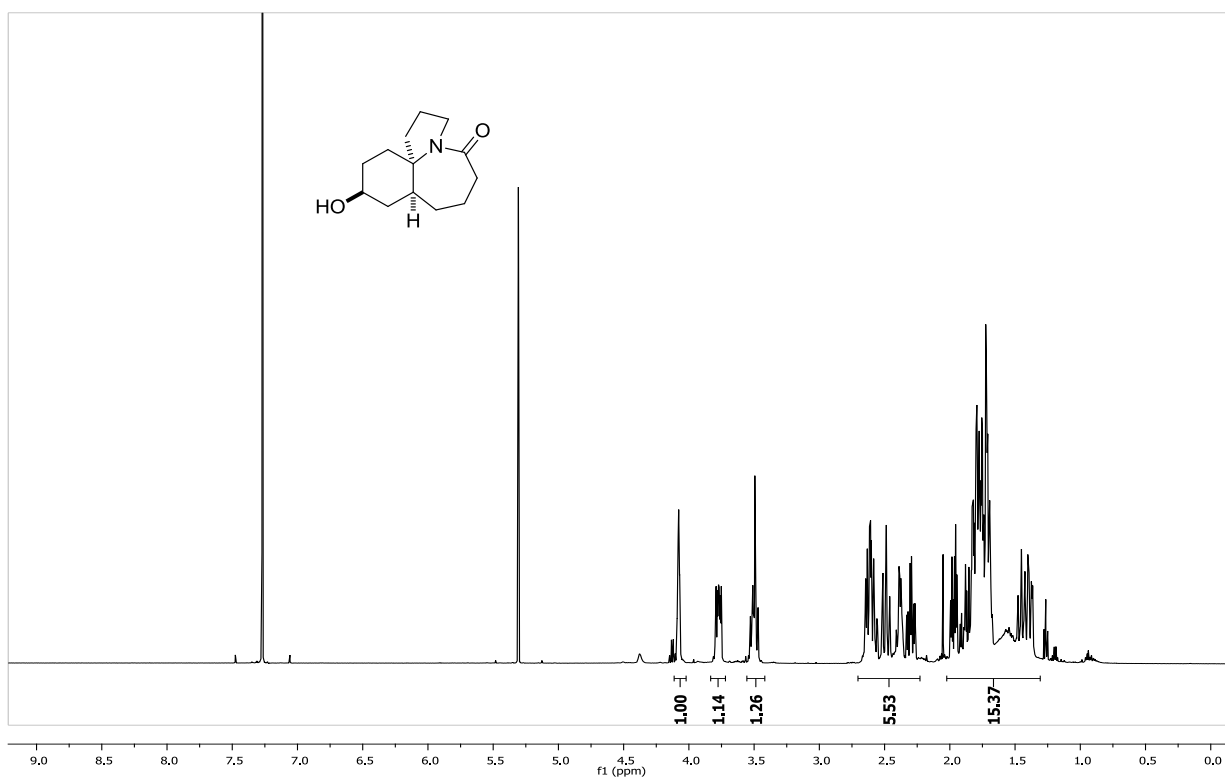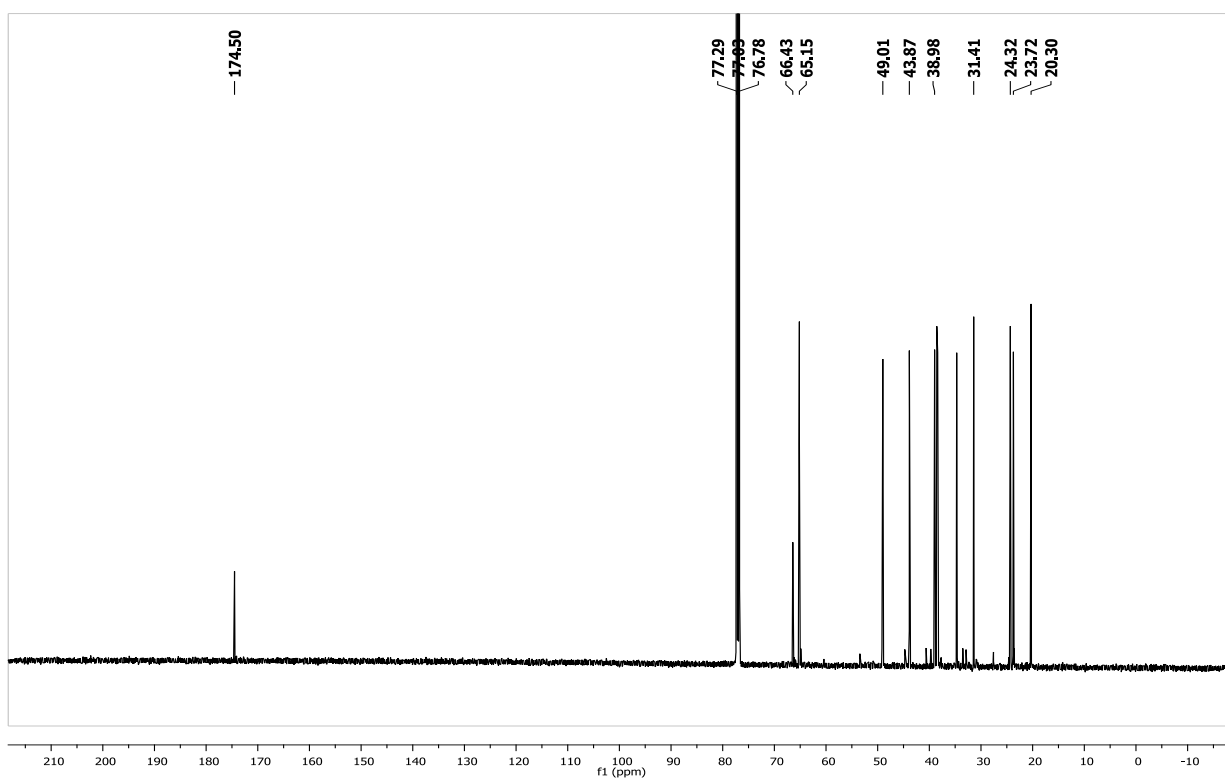



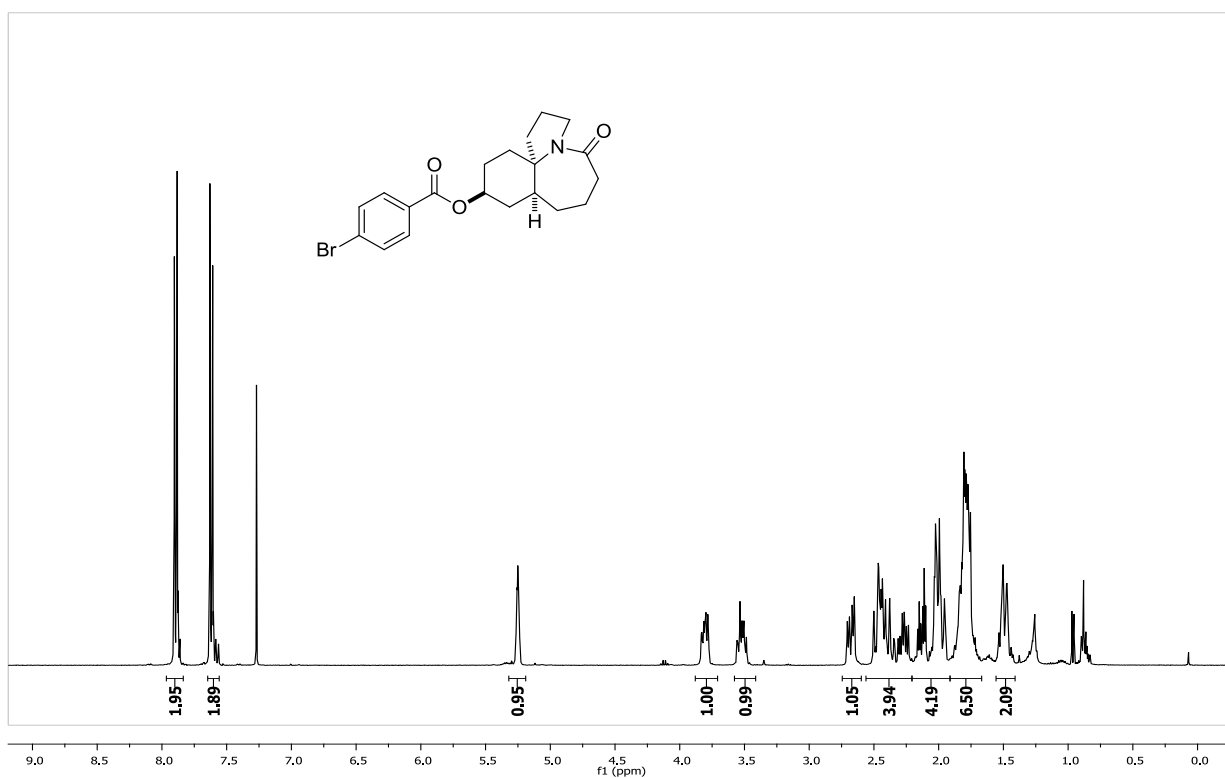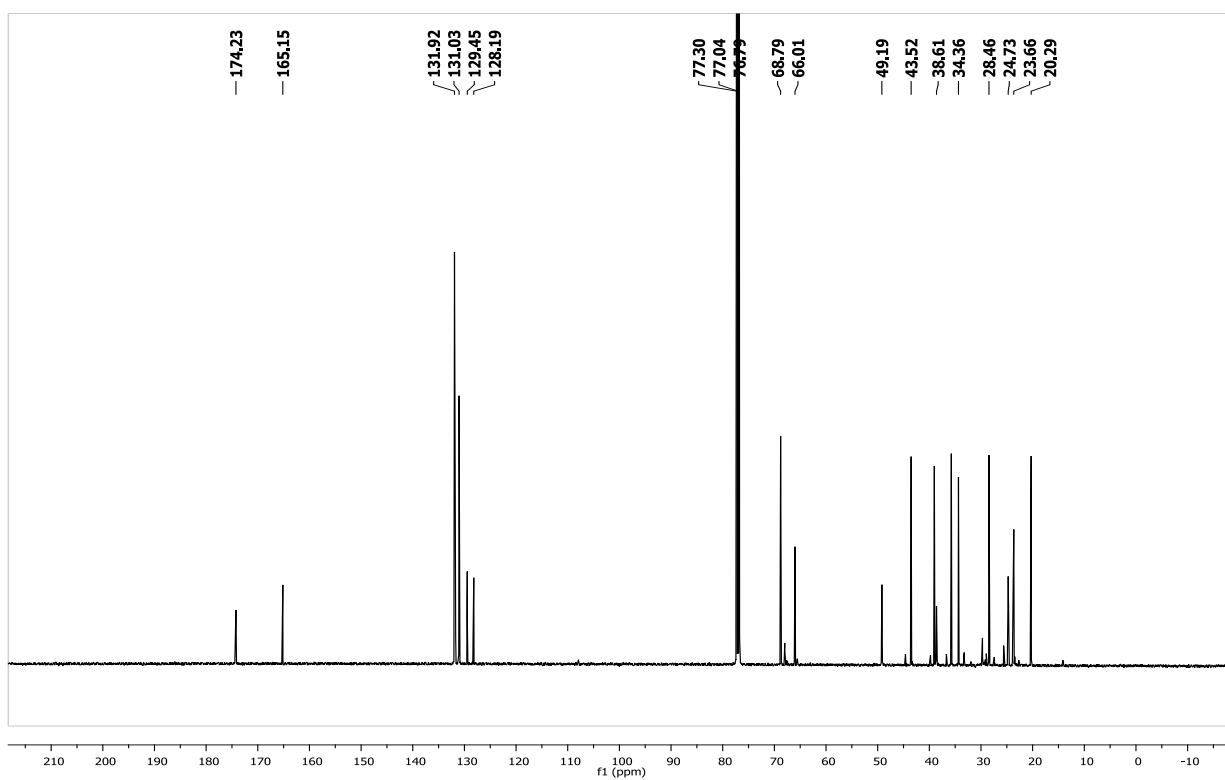

S3b

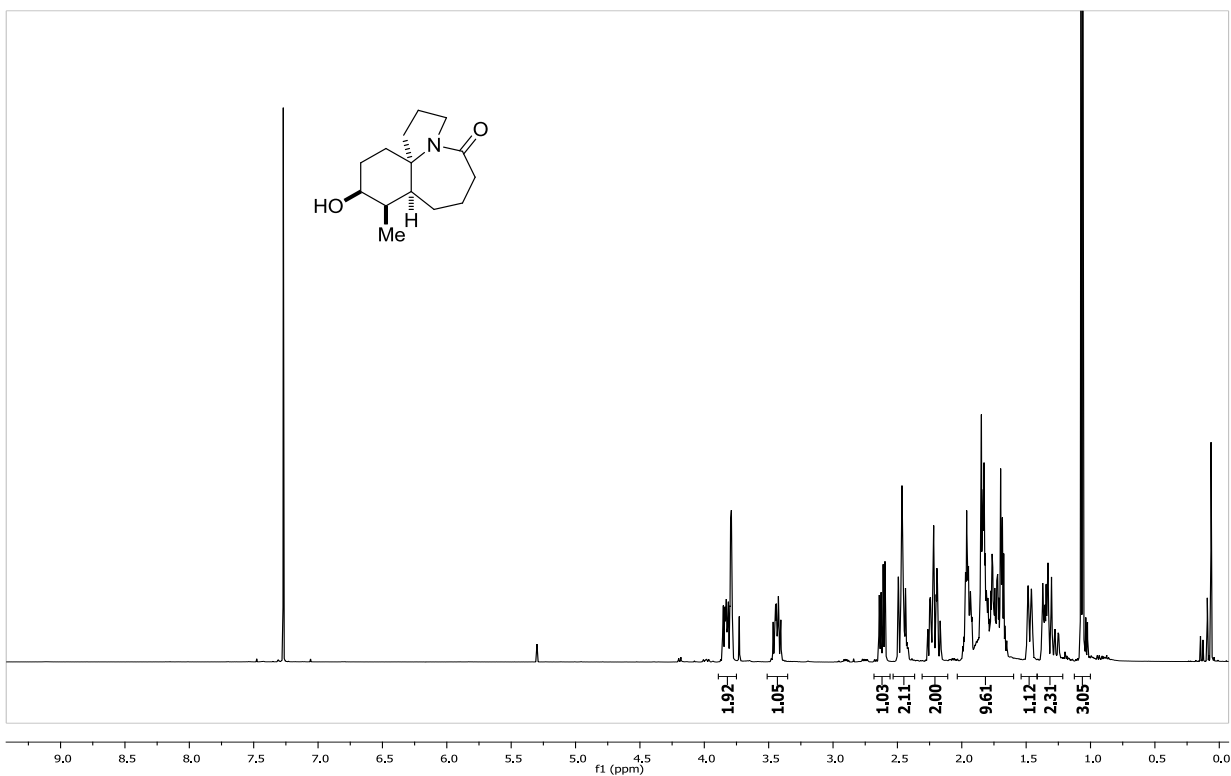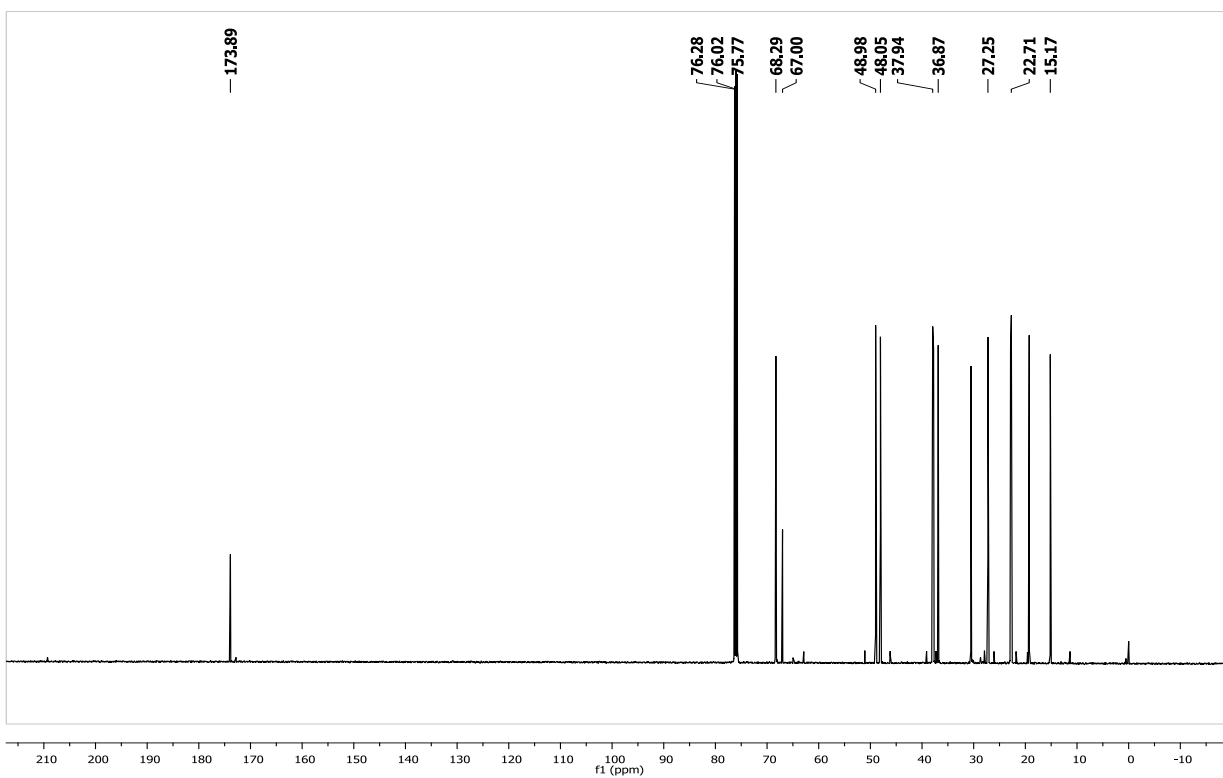

S3c

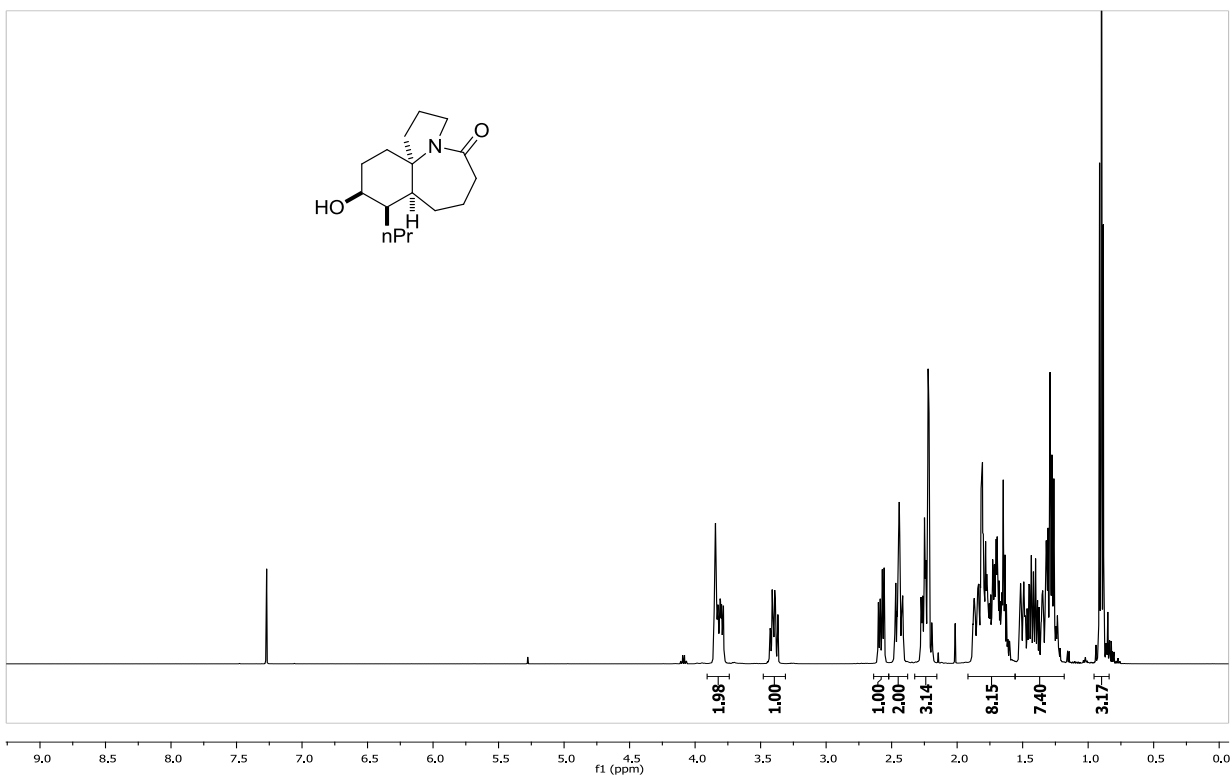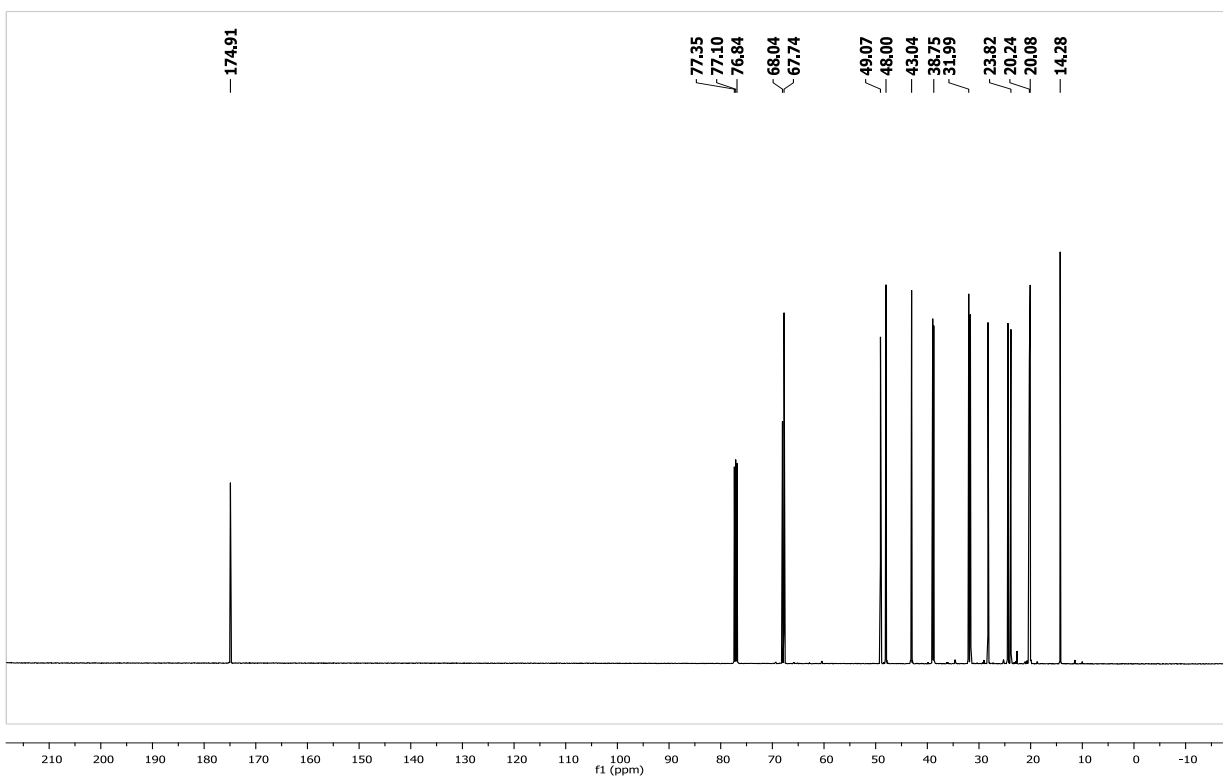

S3d

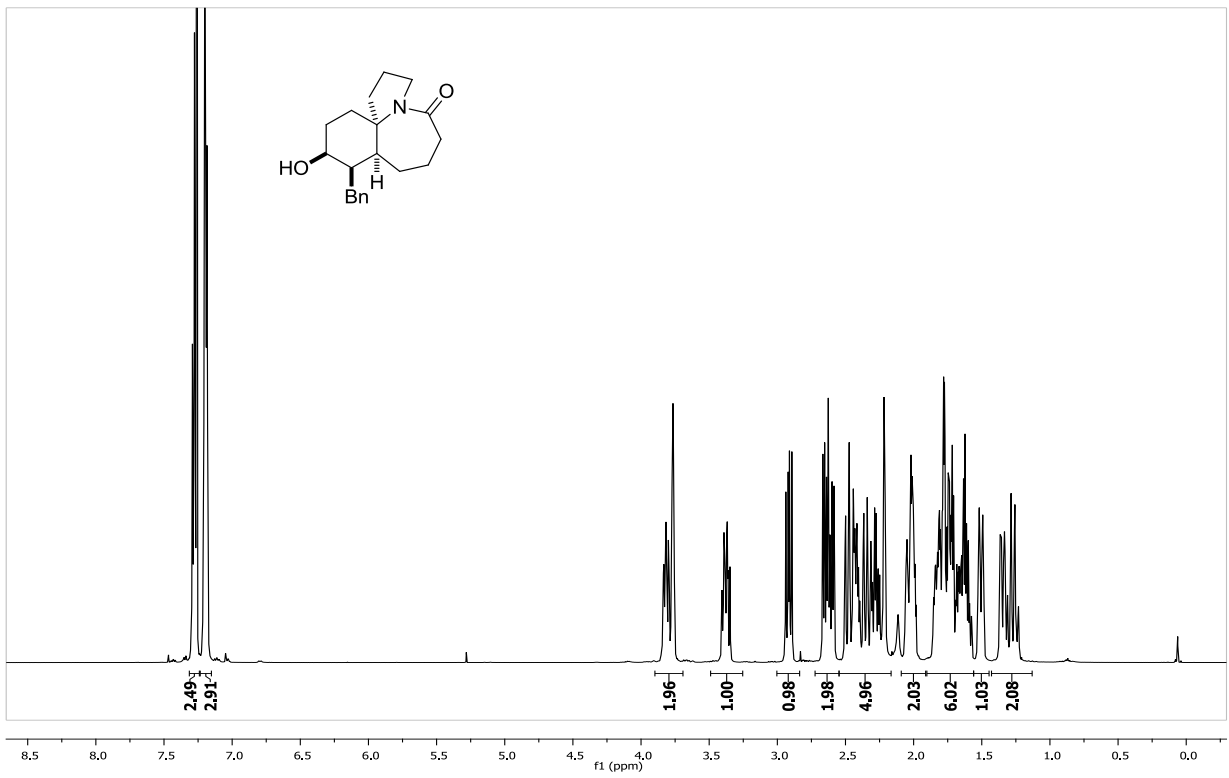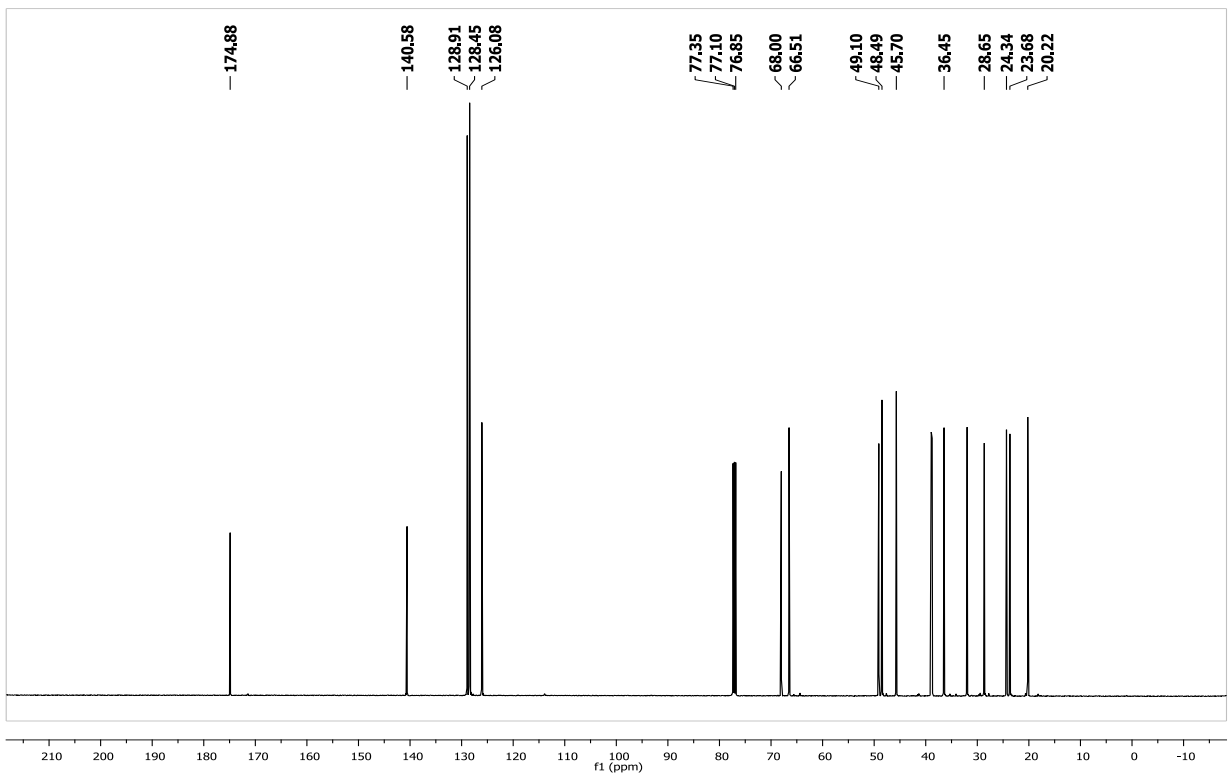

S4a

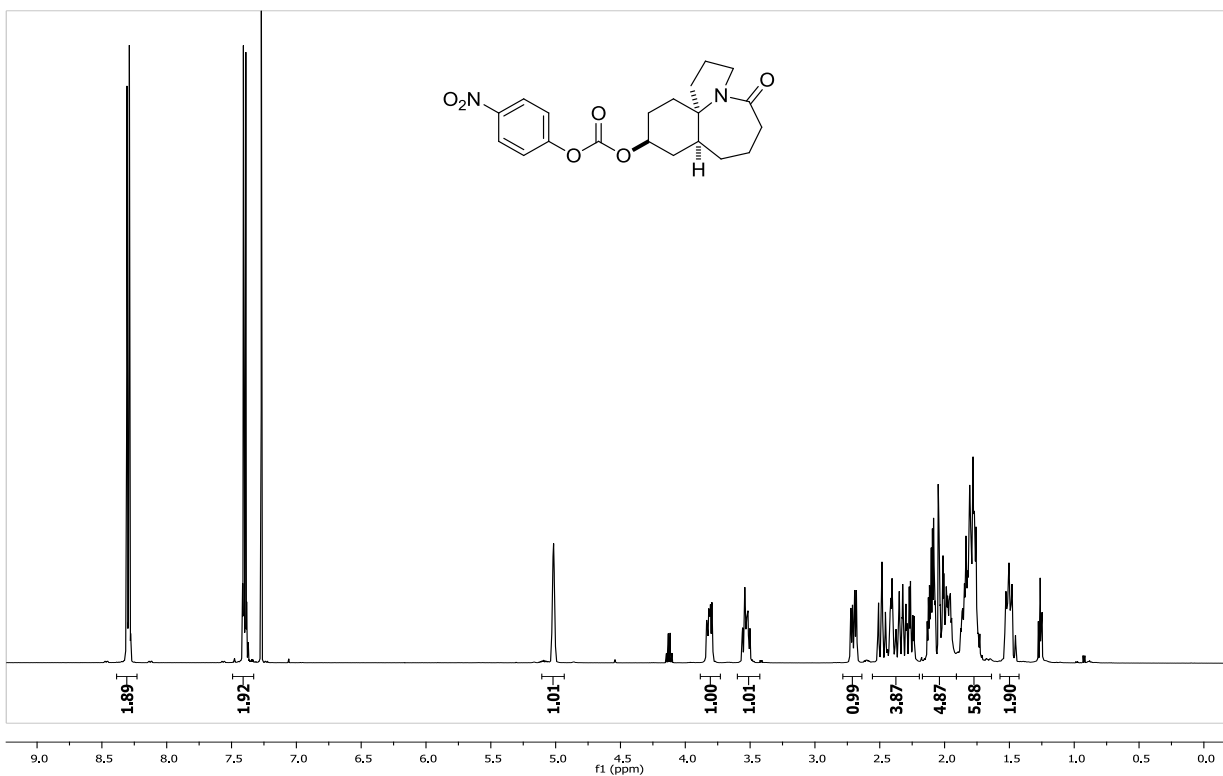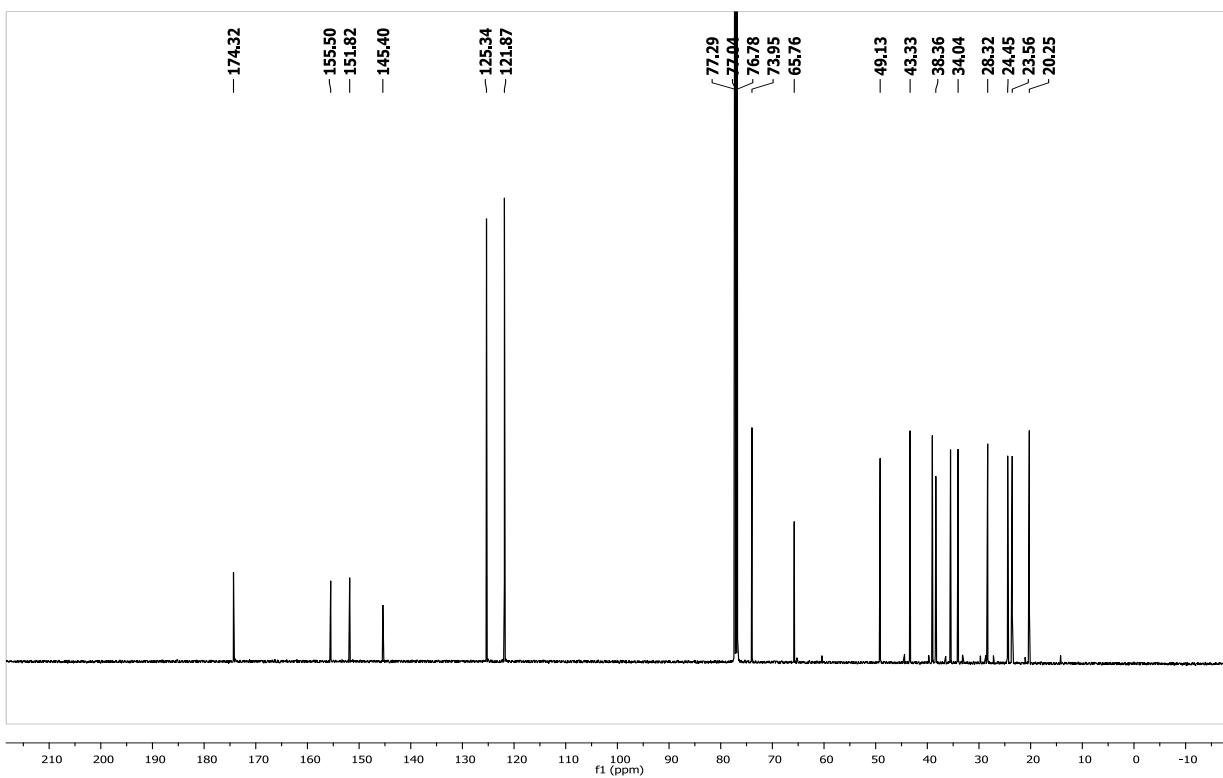

S4b

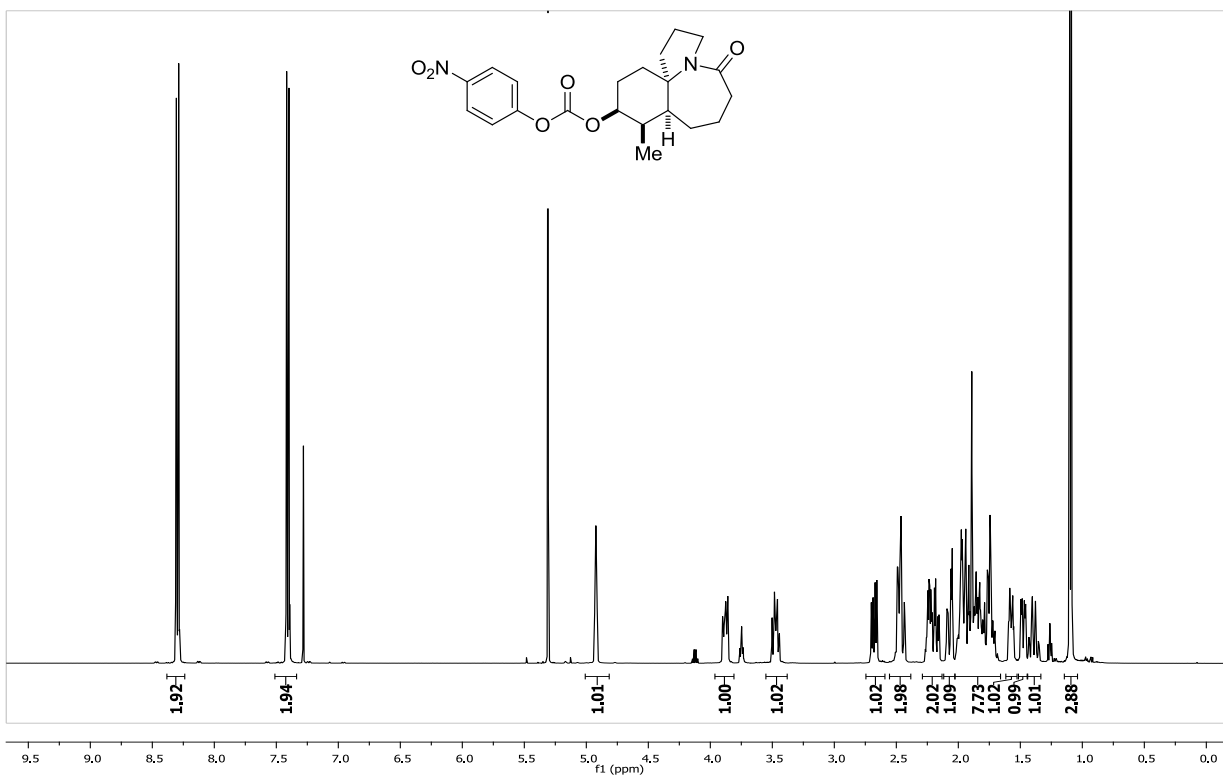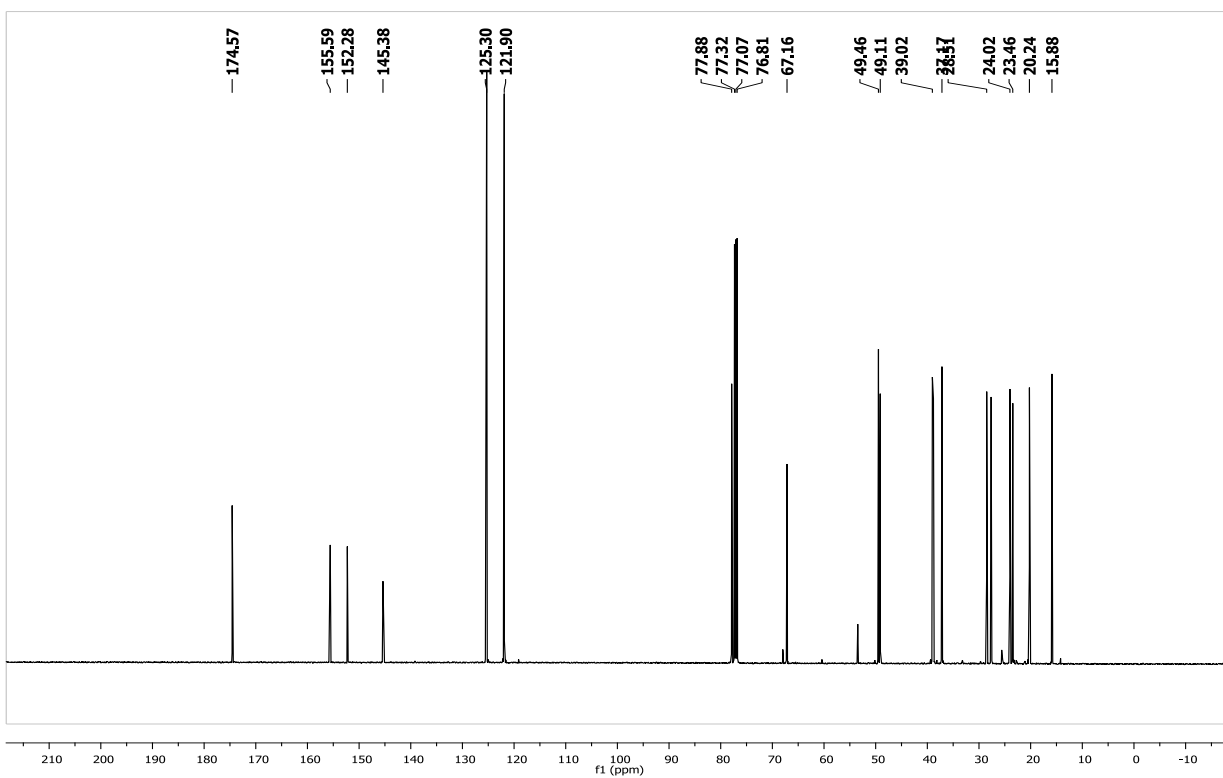

S4c

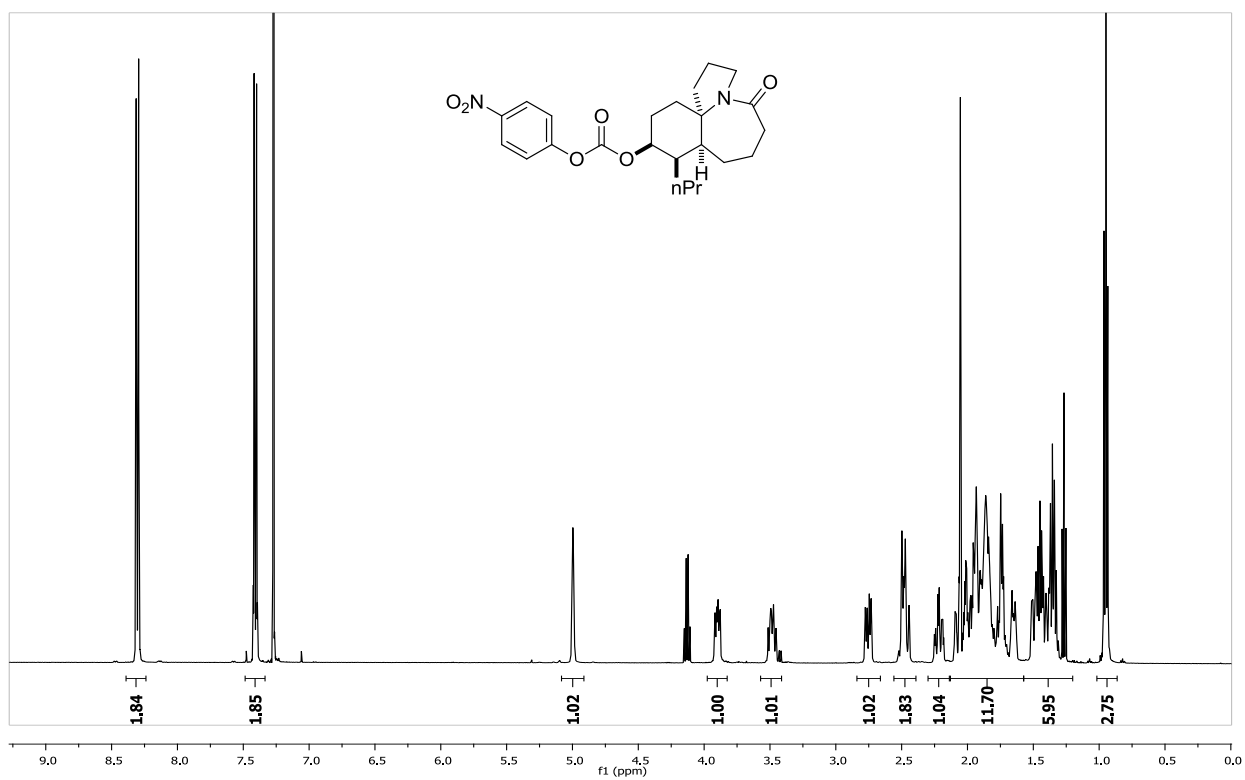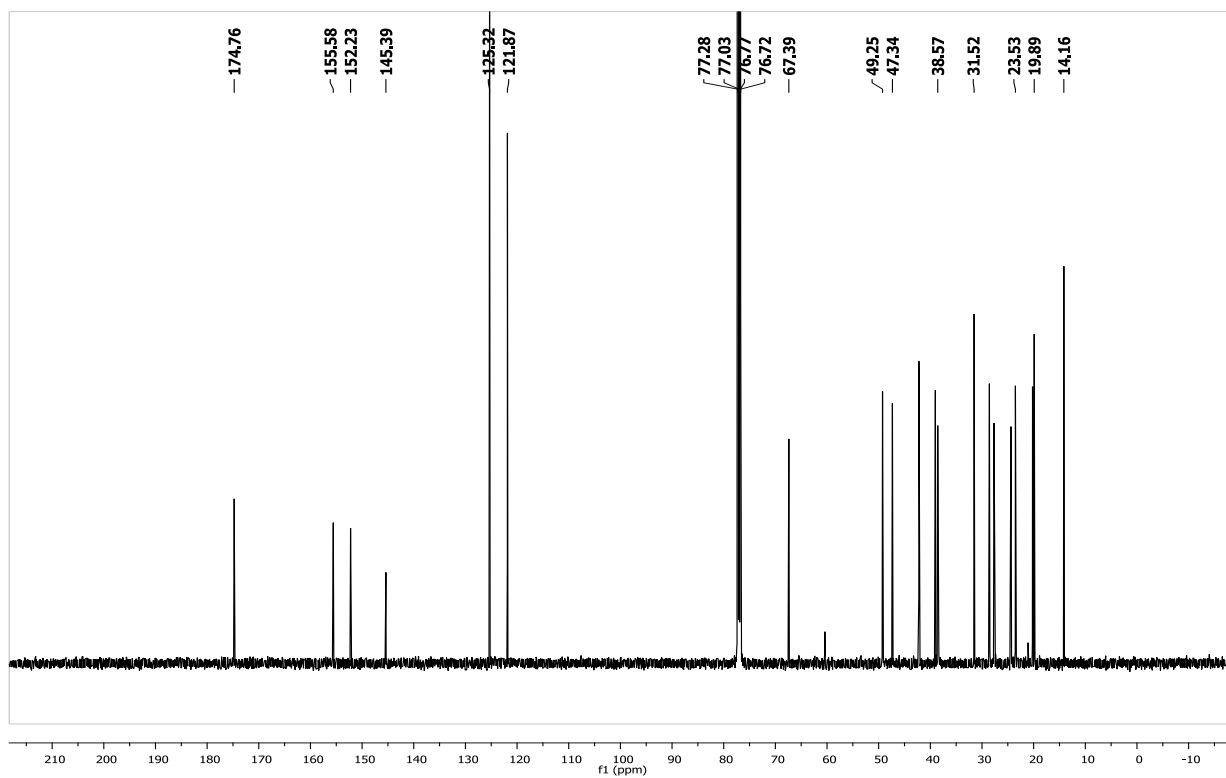

S4d

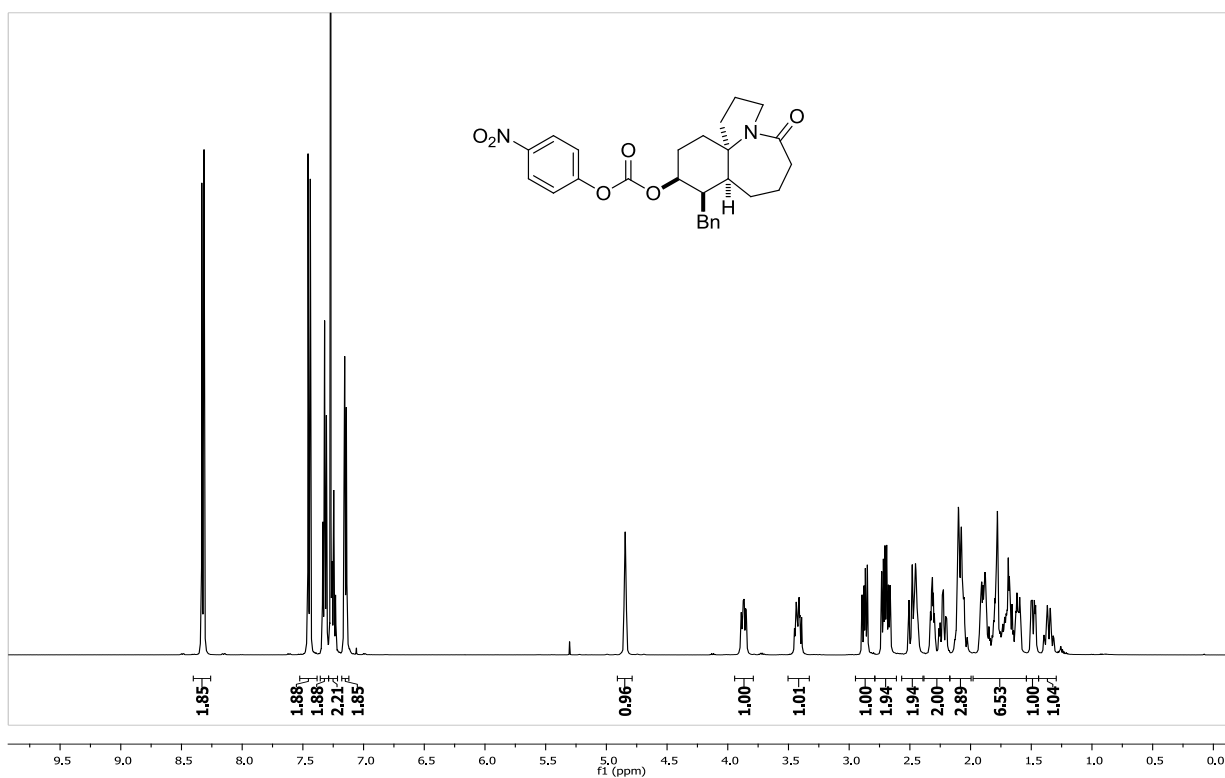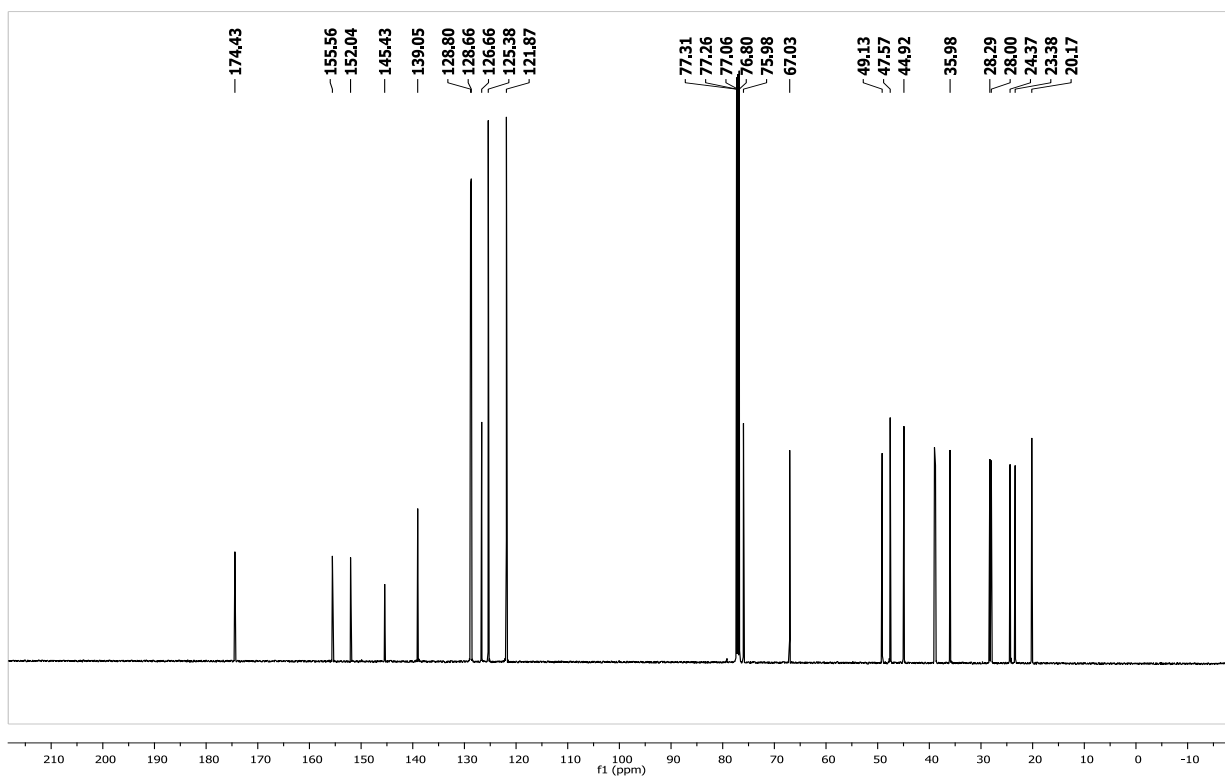



S5b

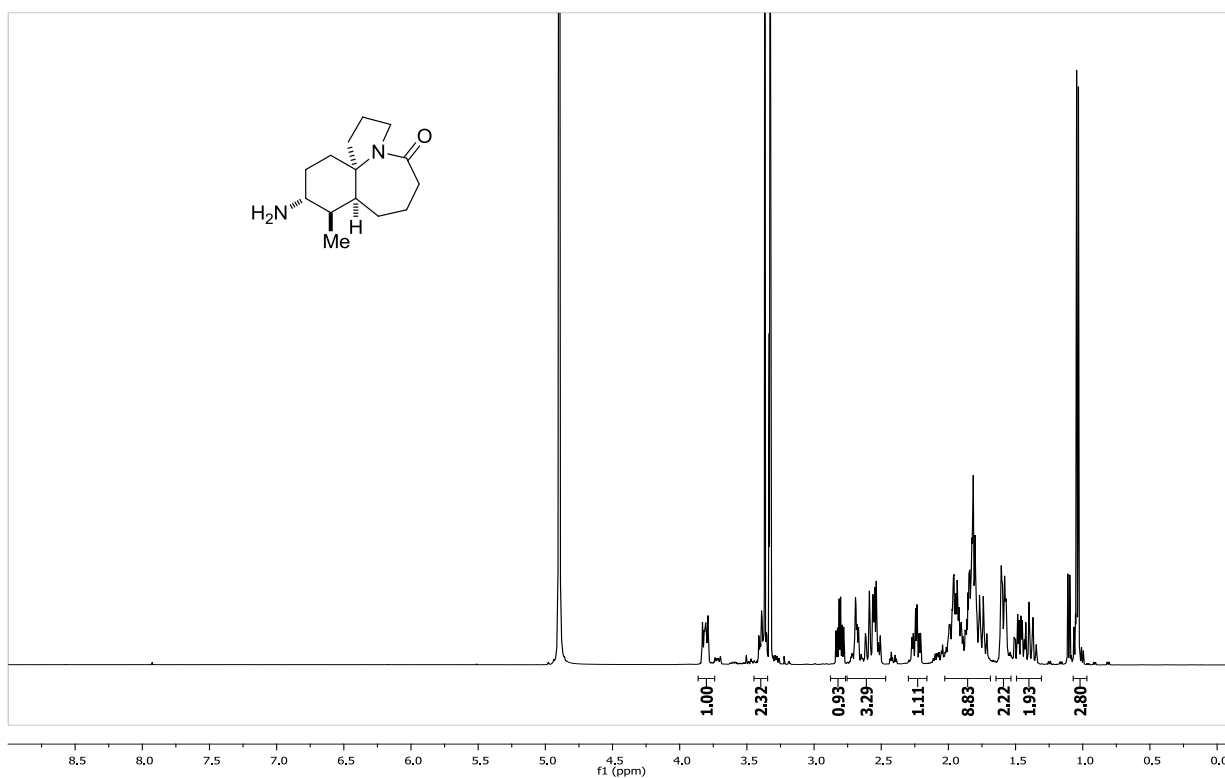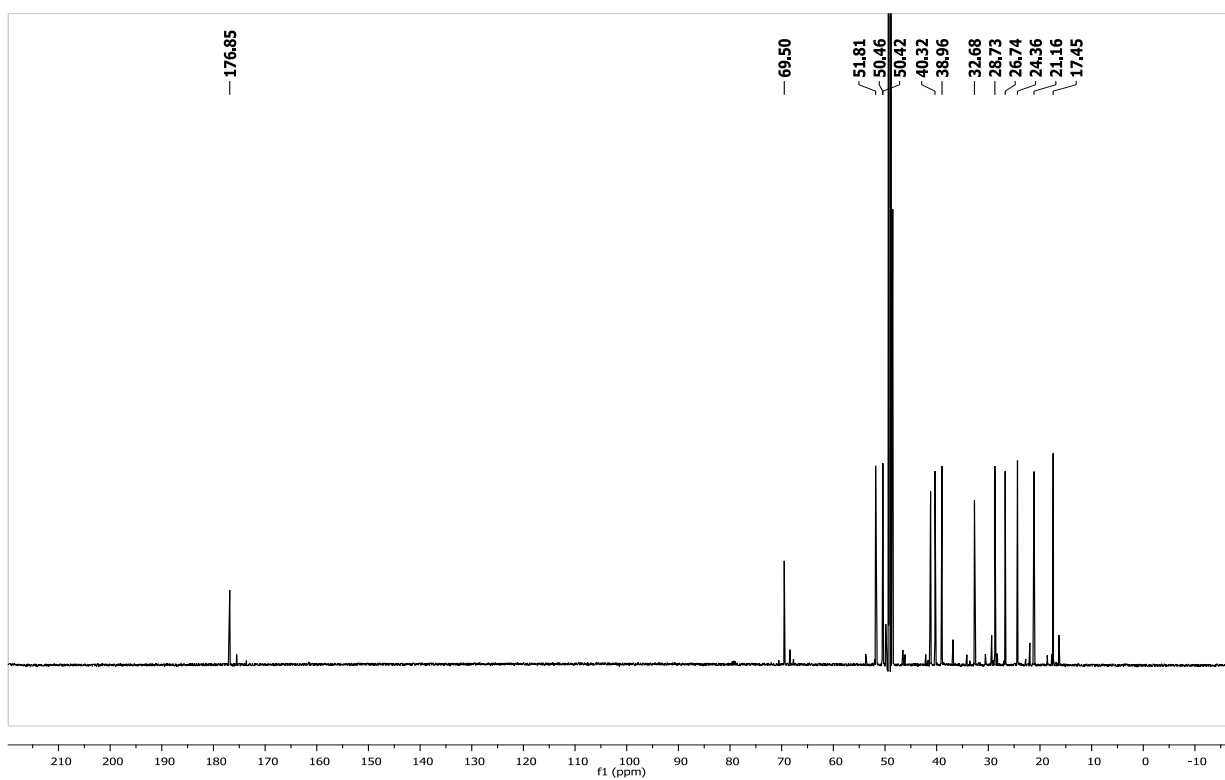

4b

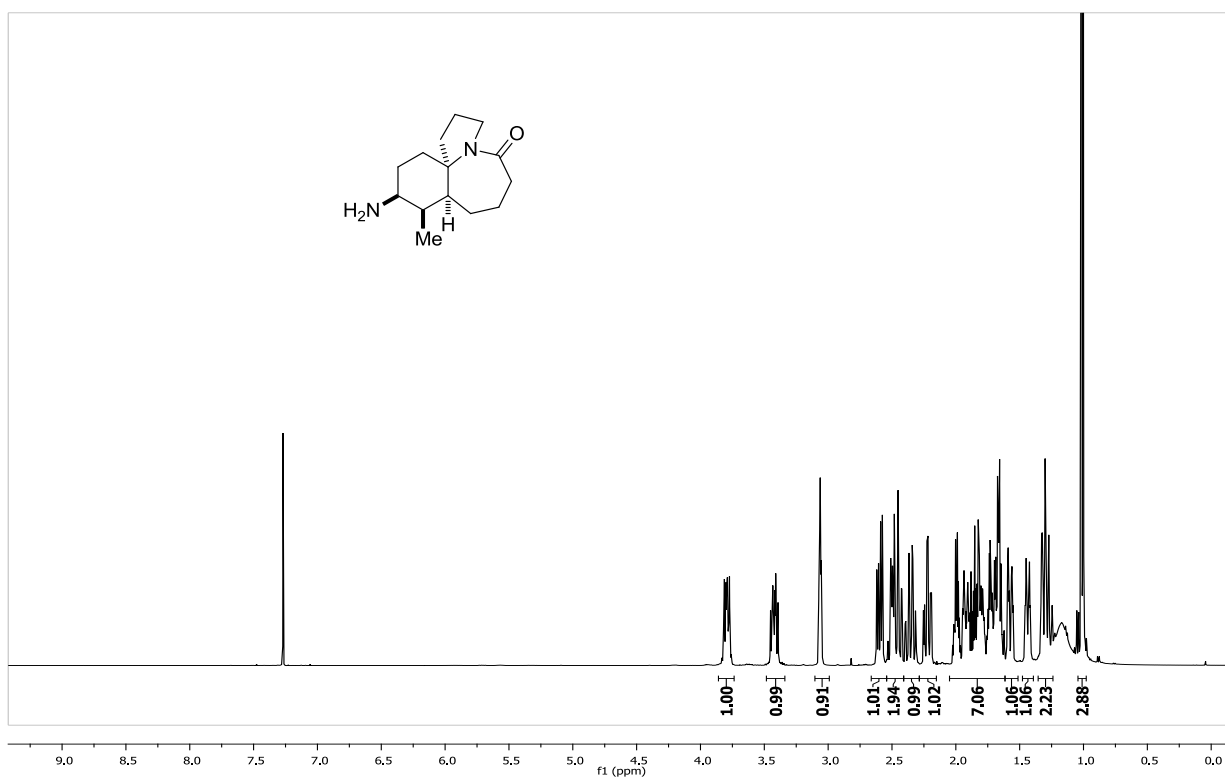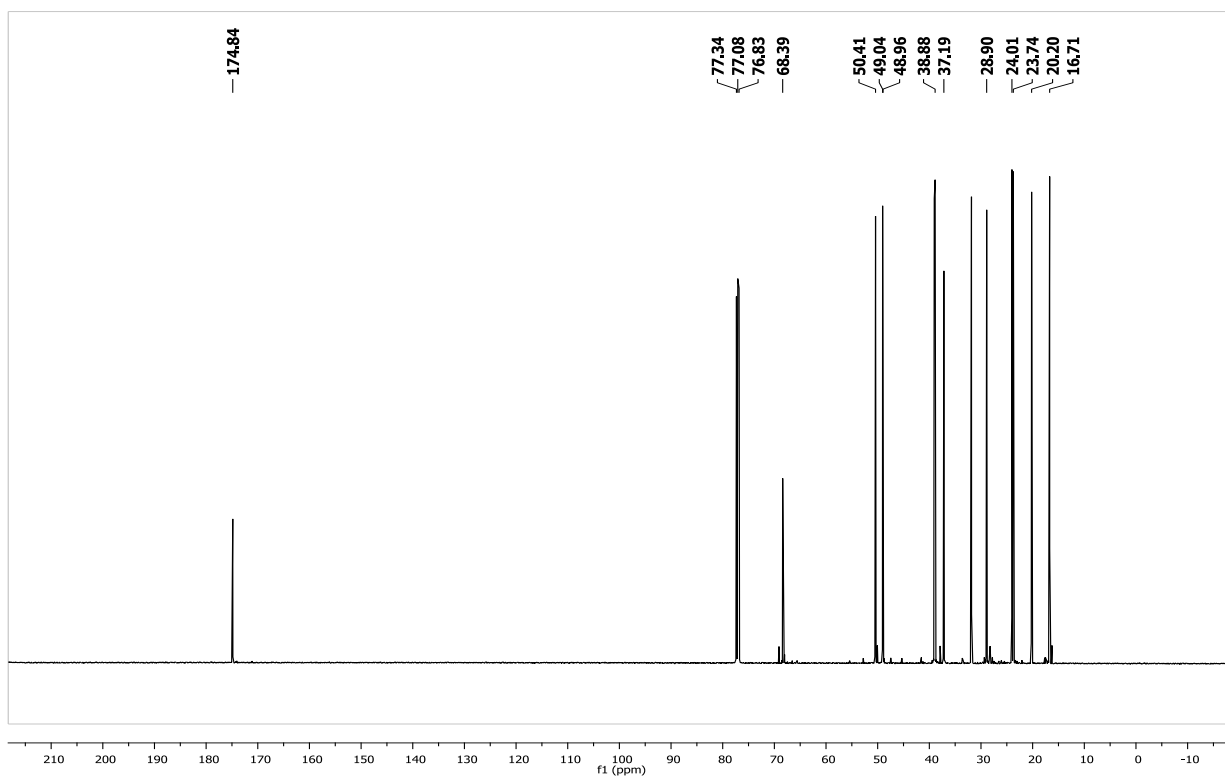

S5c

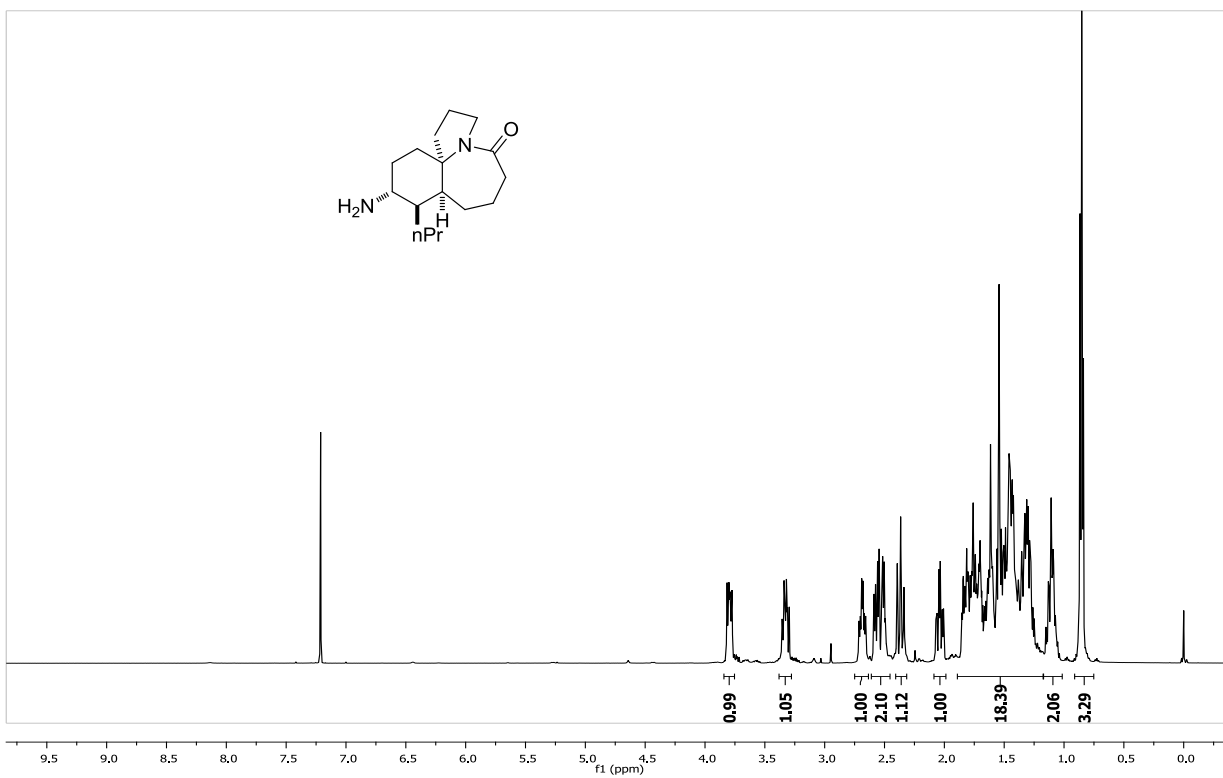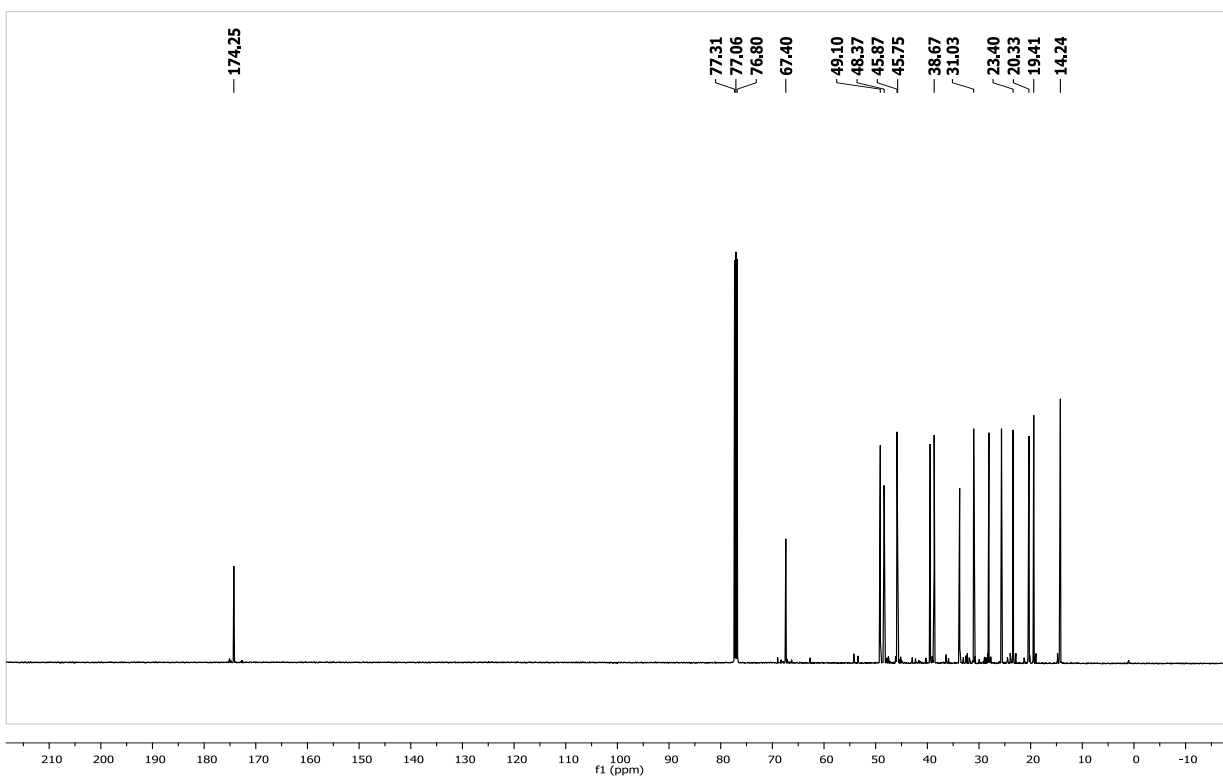

4c

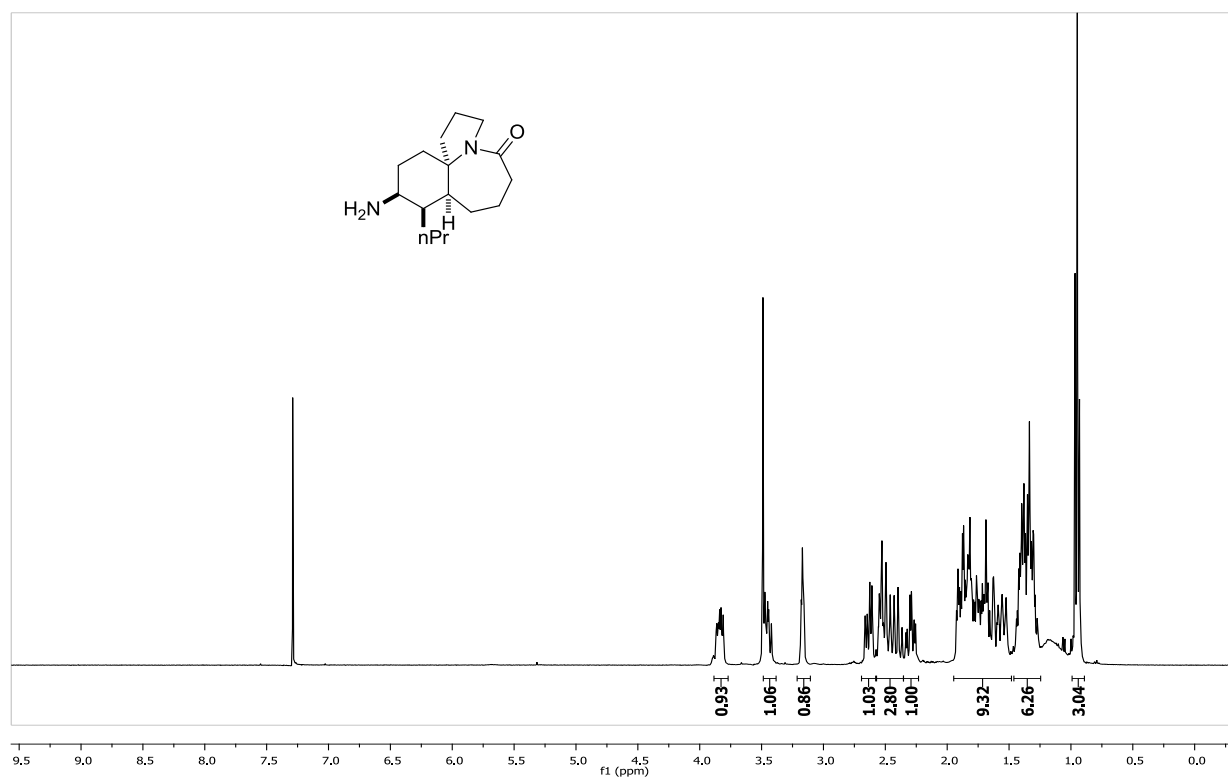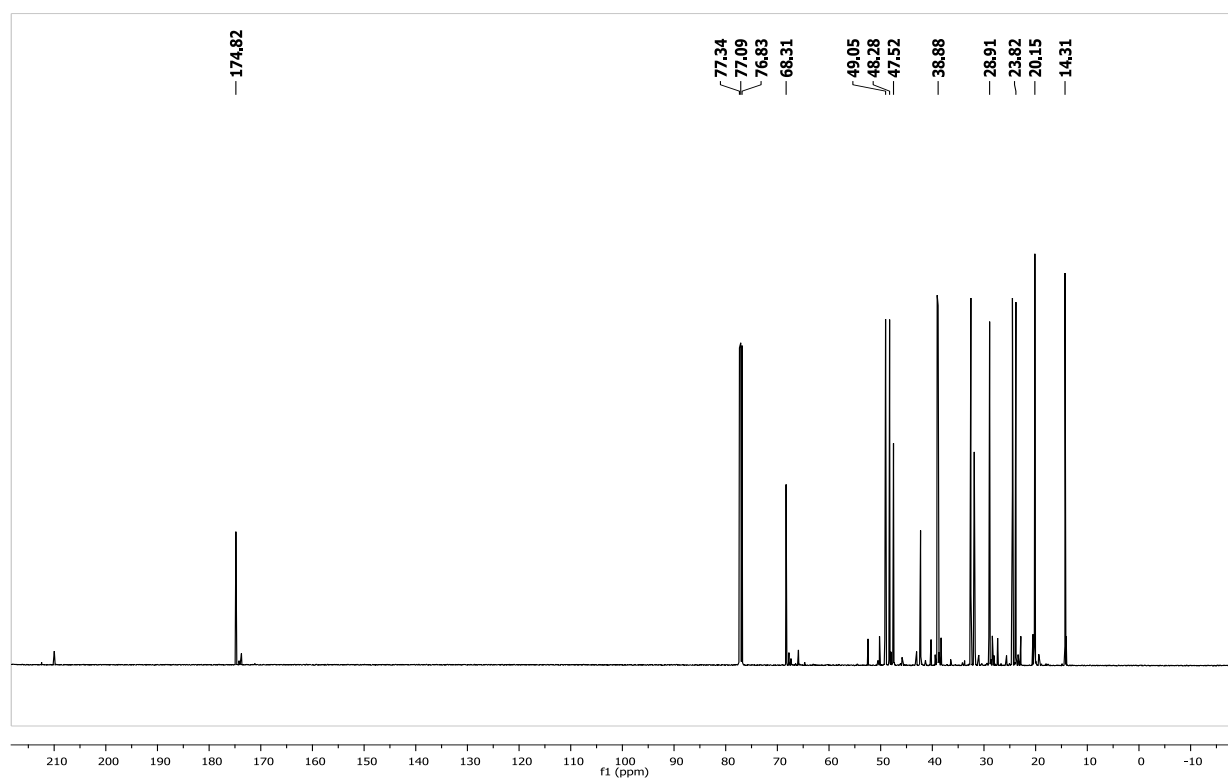

S5d

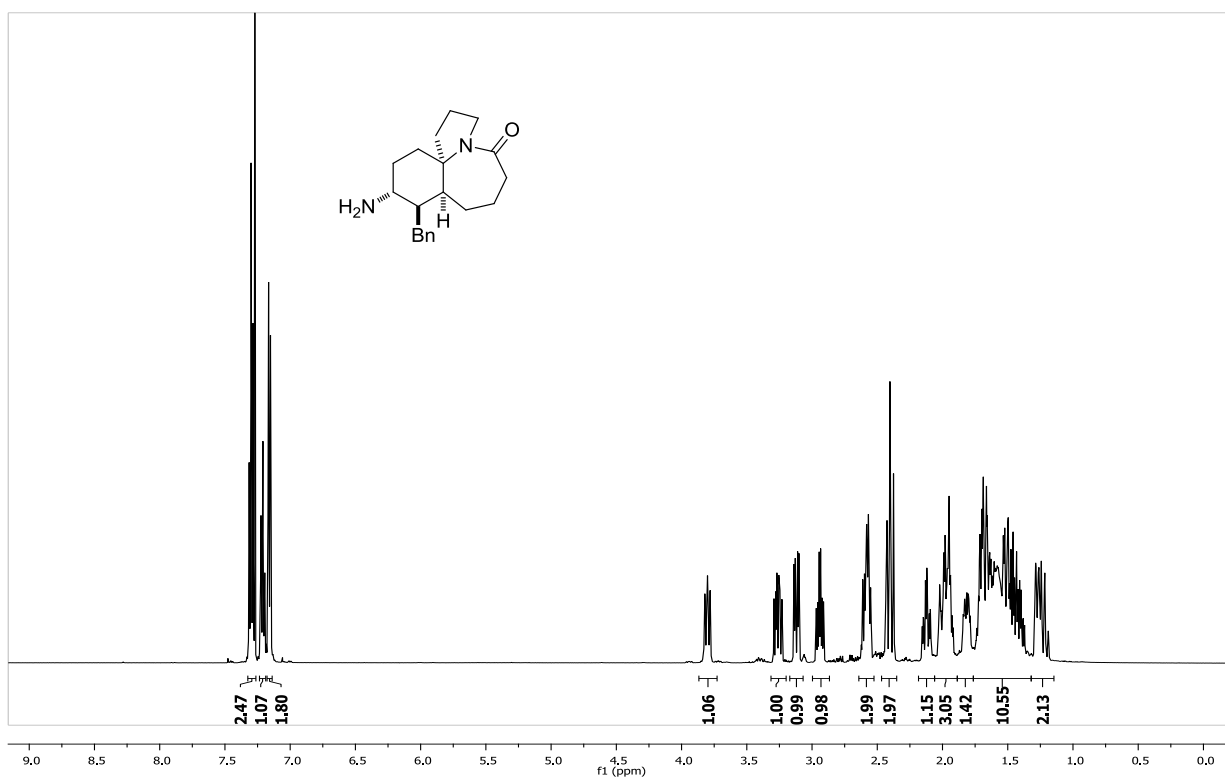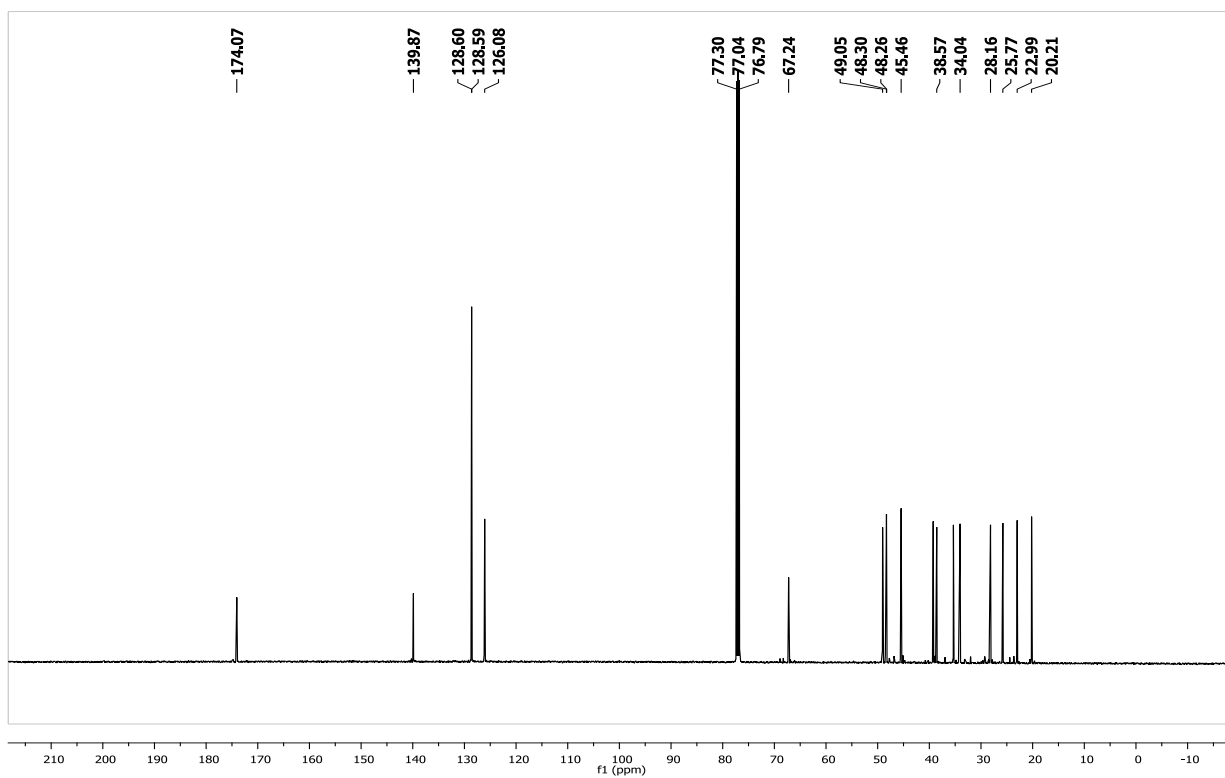

4d

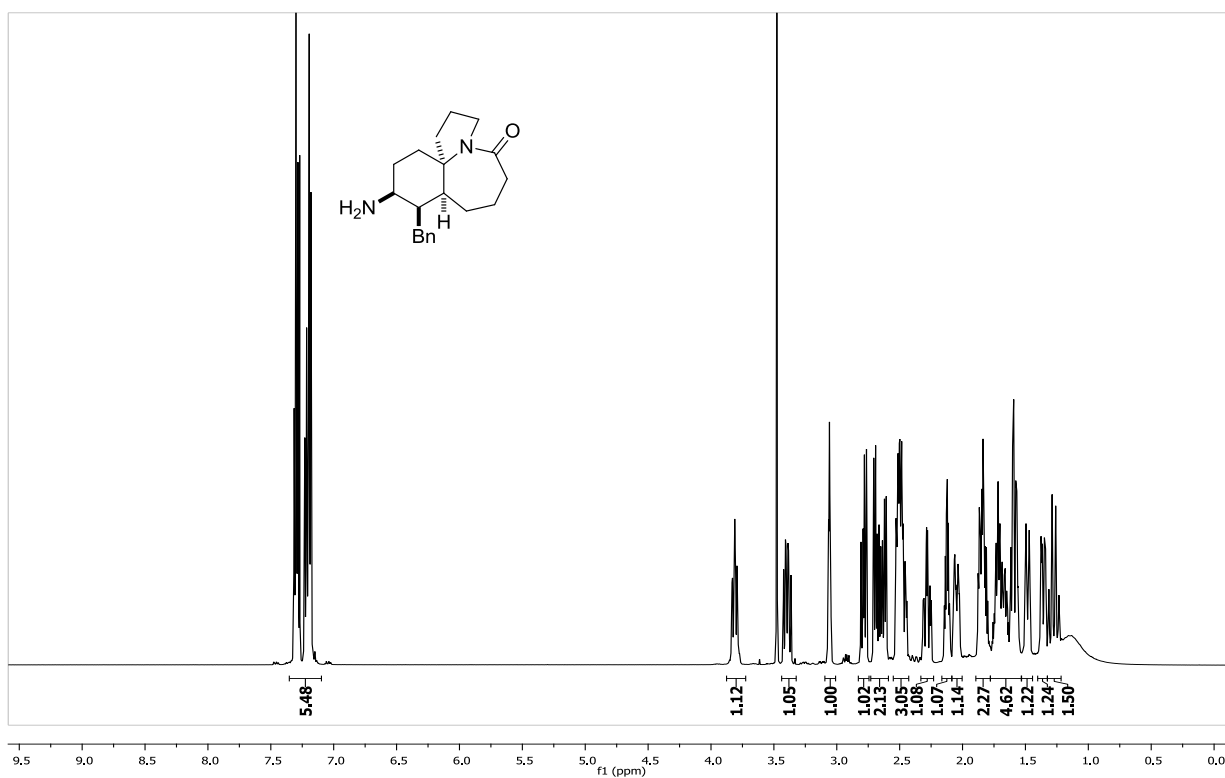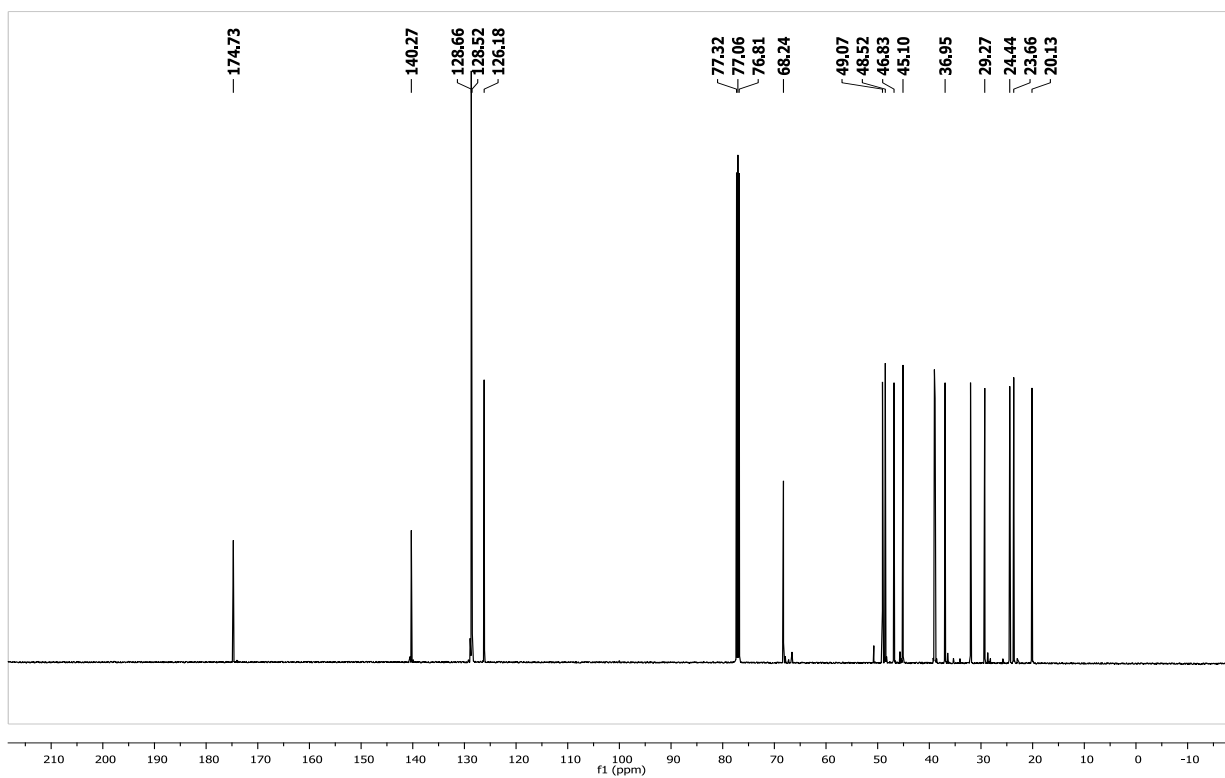

25{3}

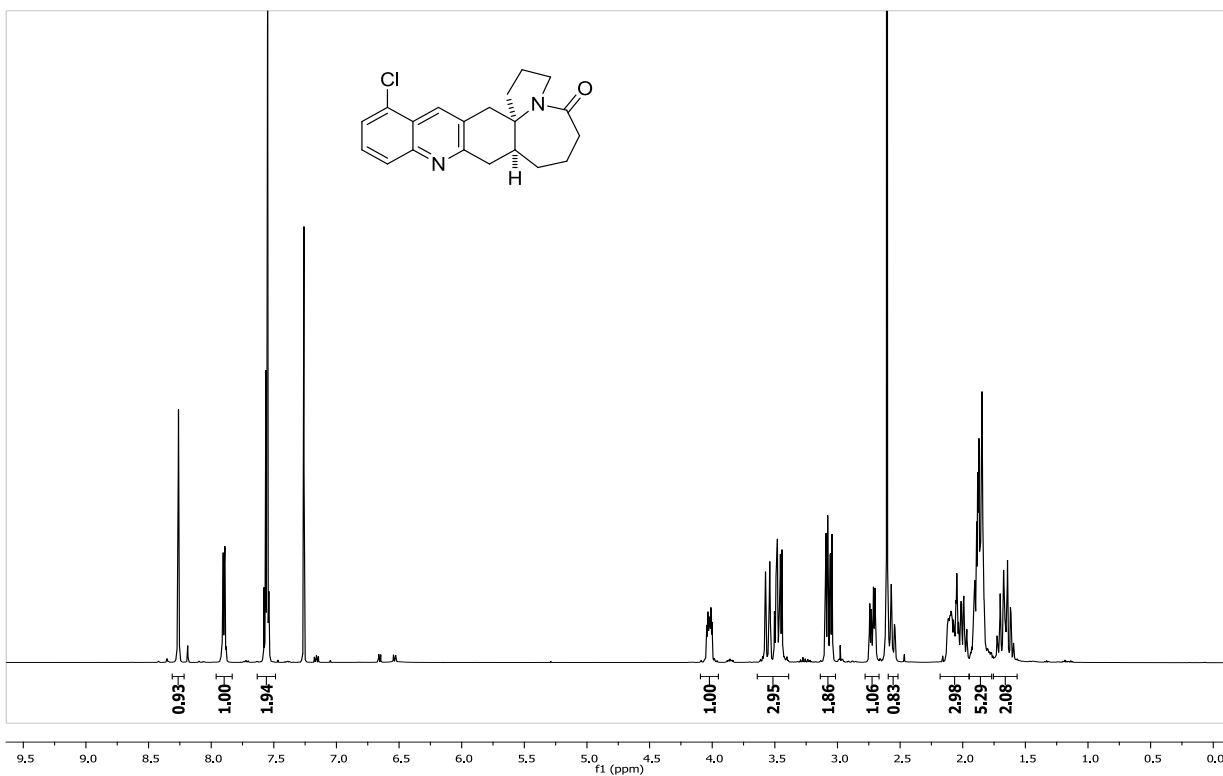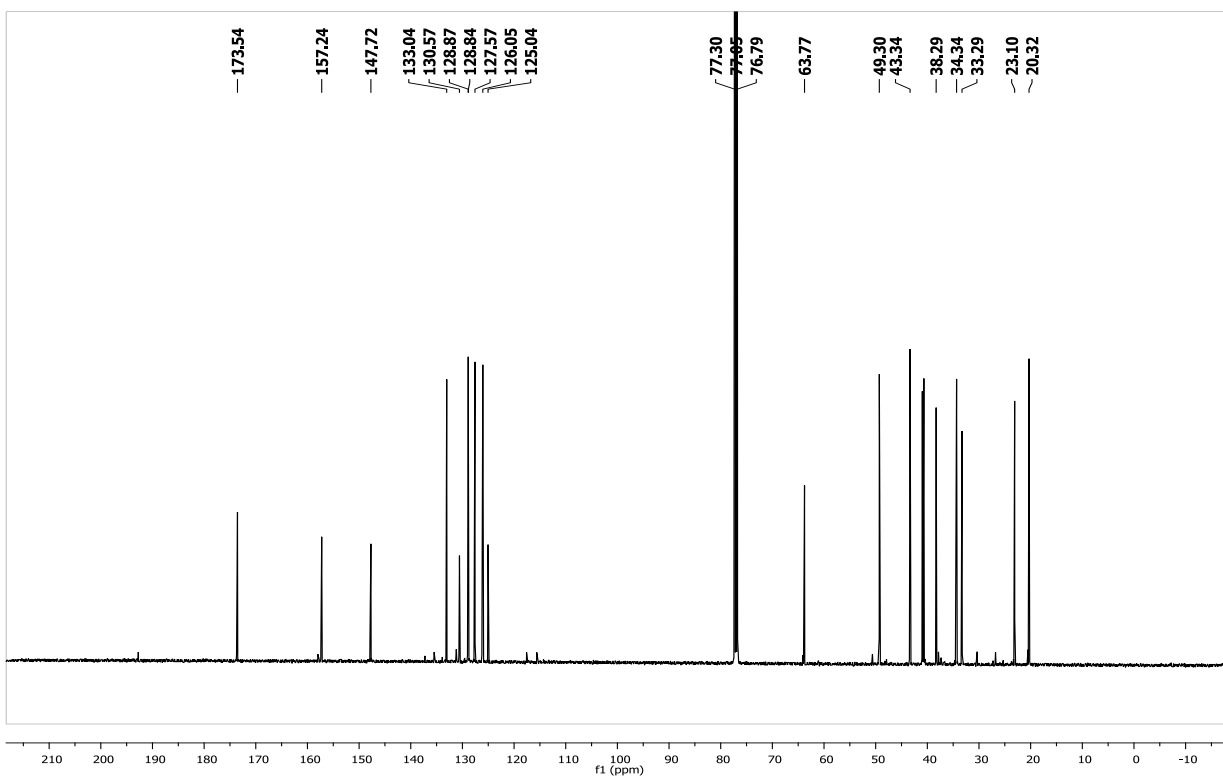

25{1}

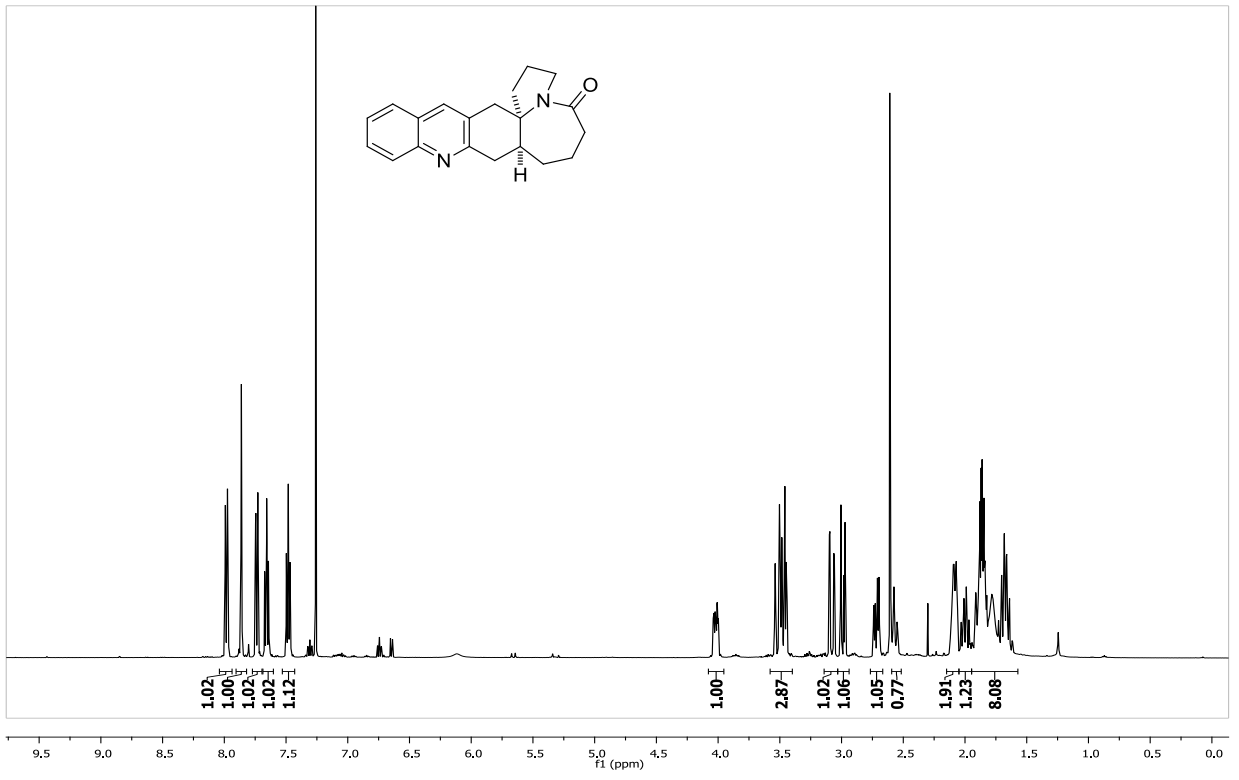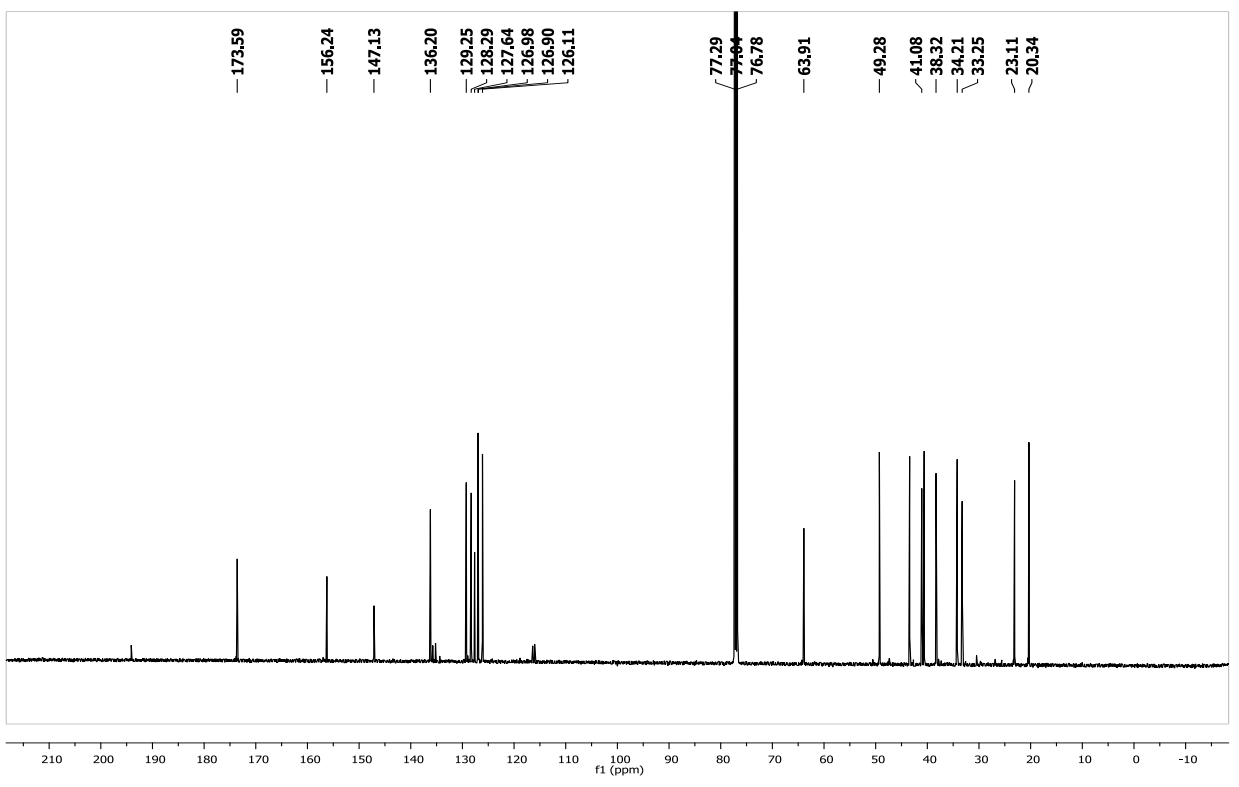



26{3}

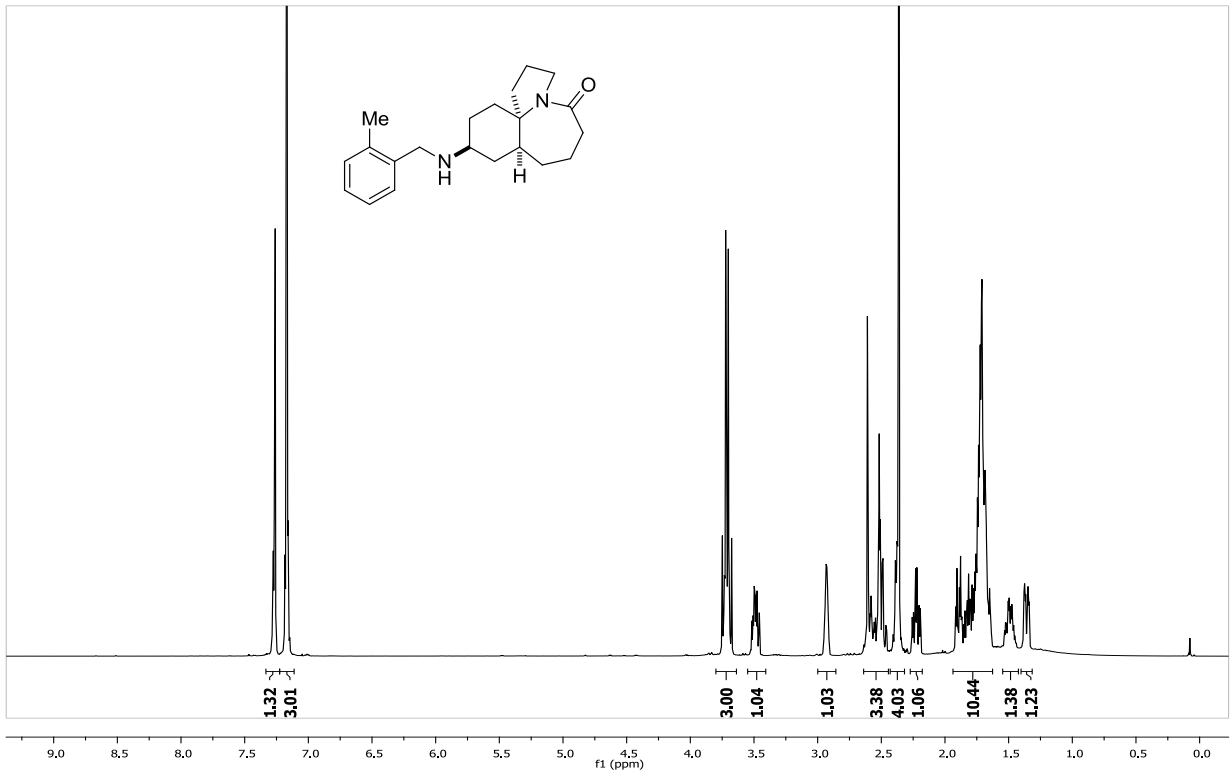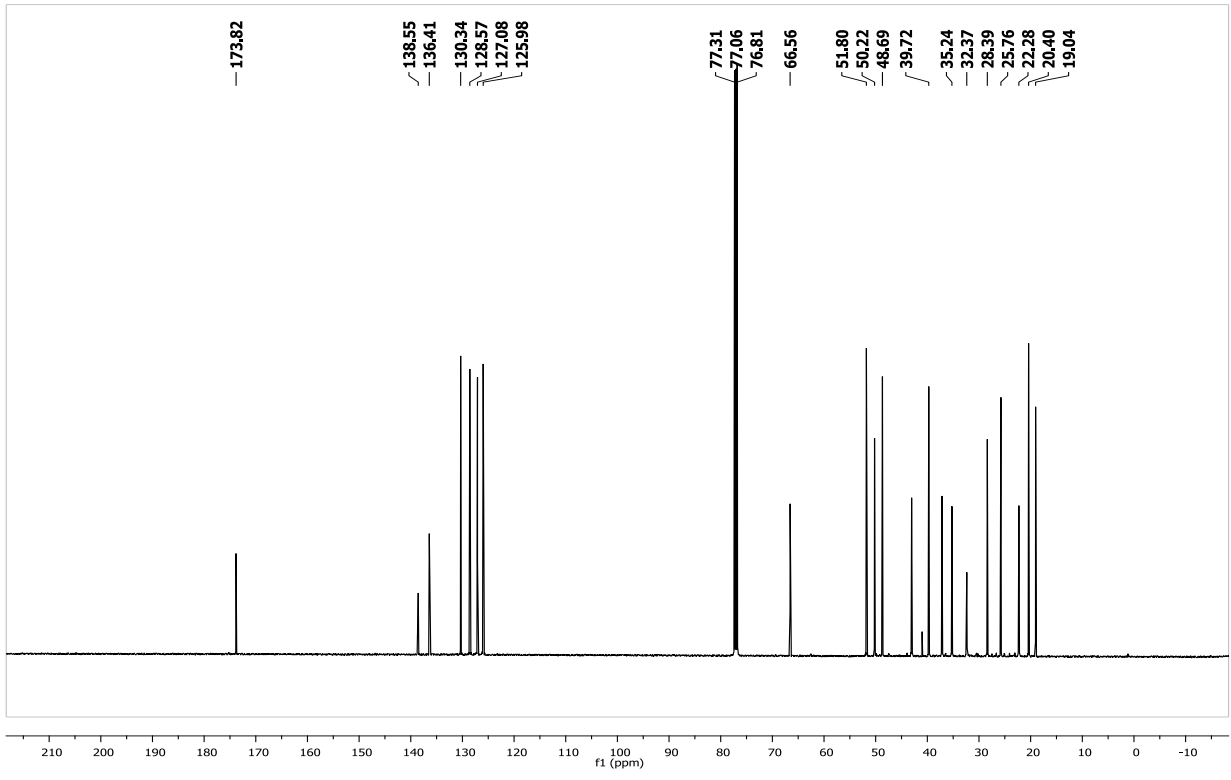

26{24}

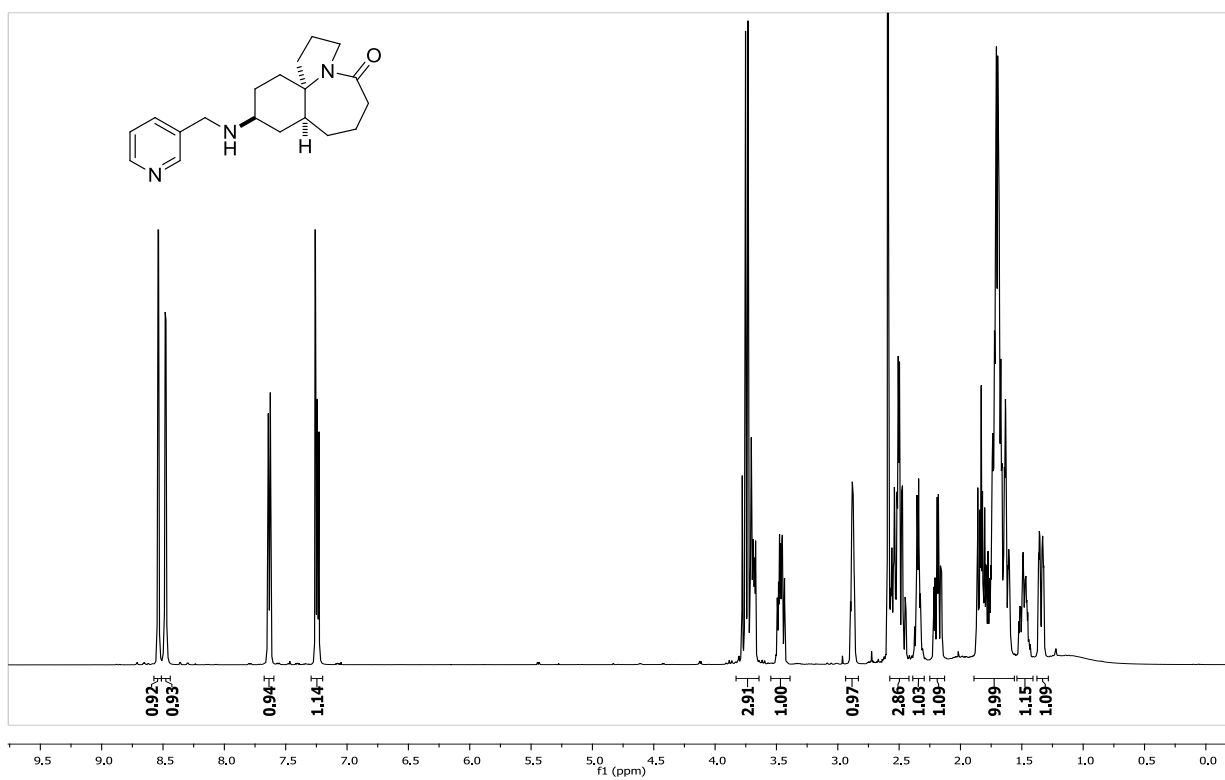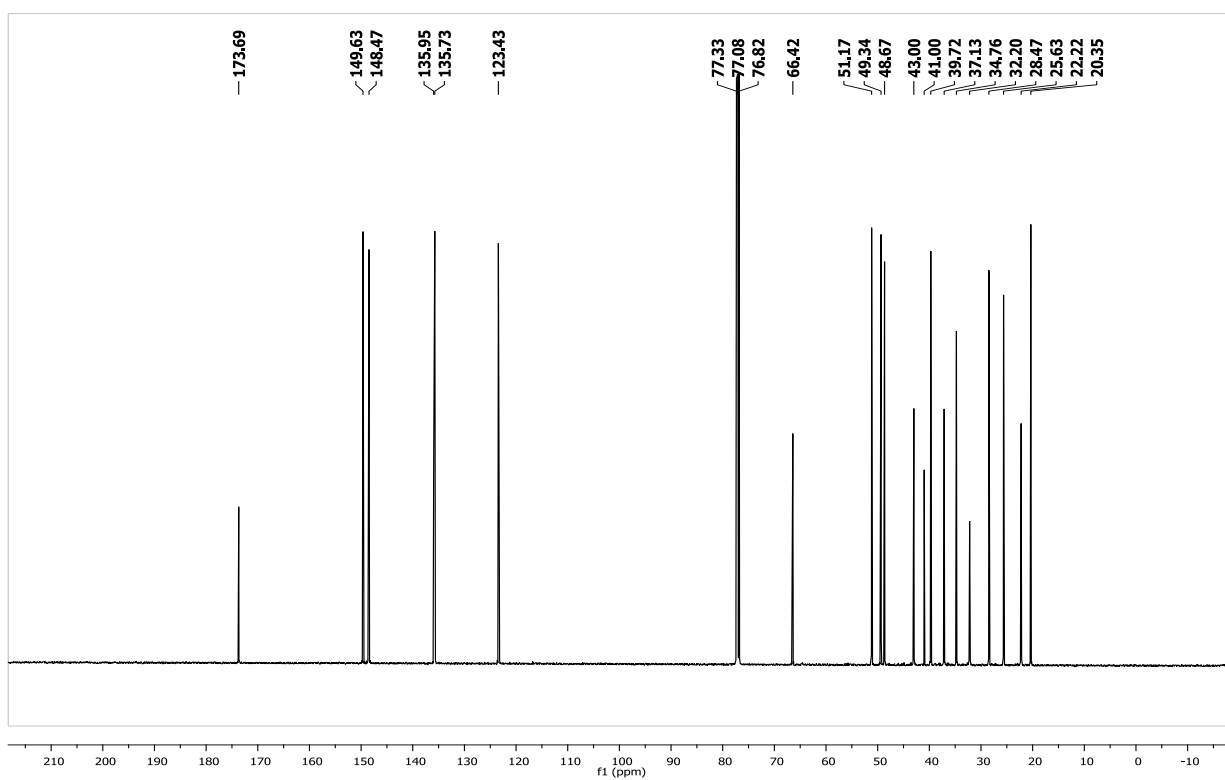

27a{3}

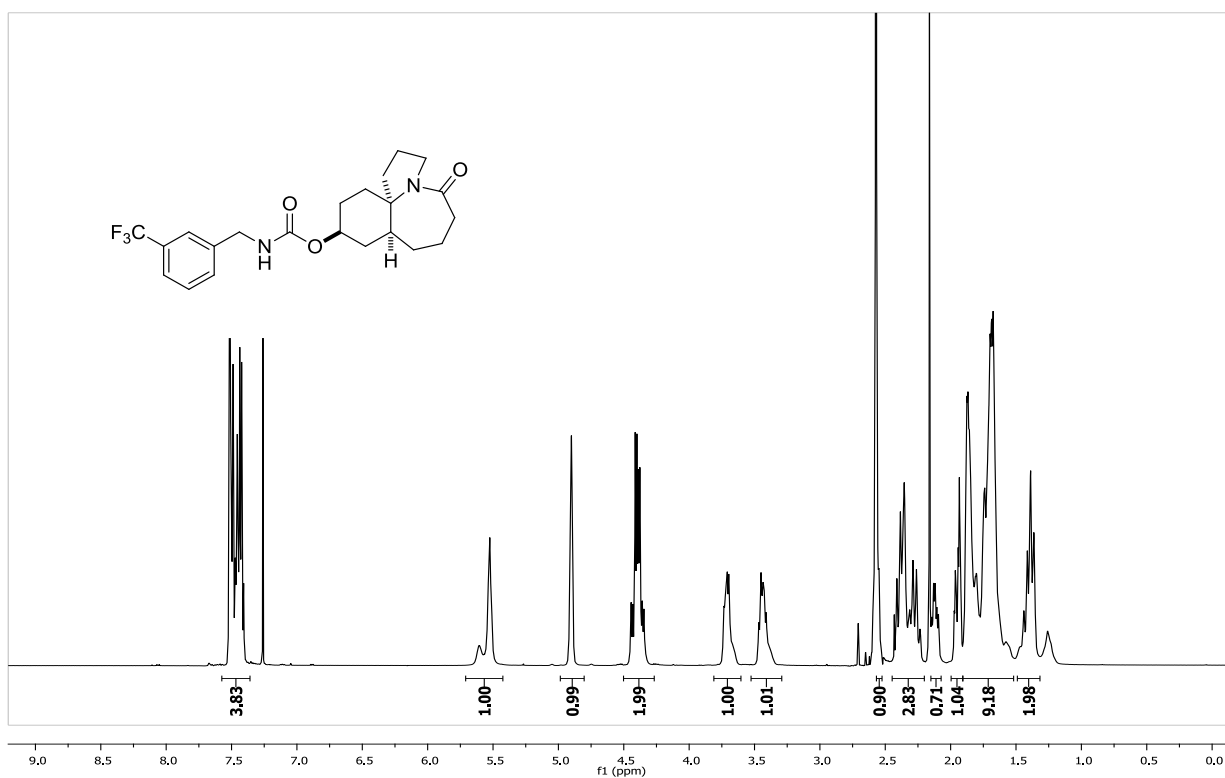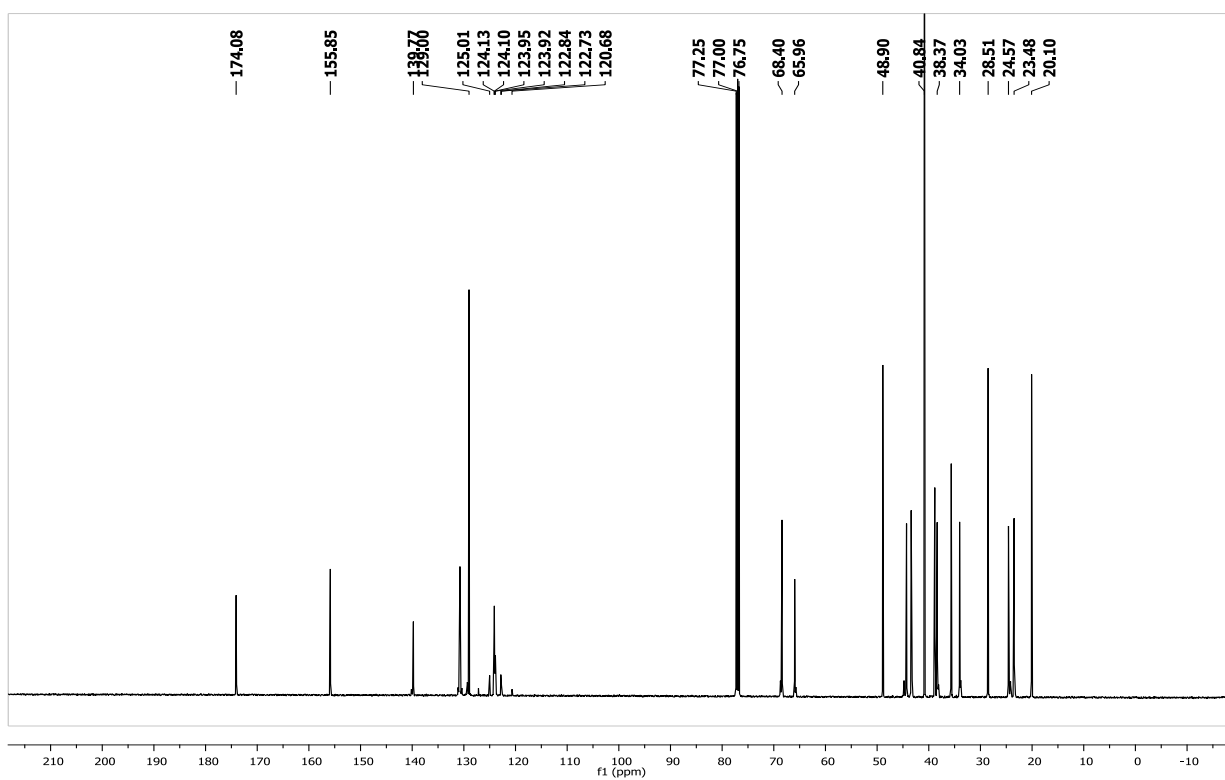

27b{1}

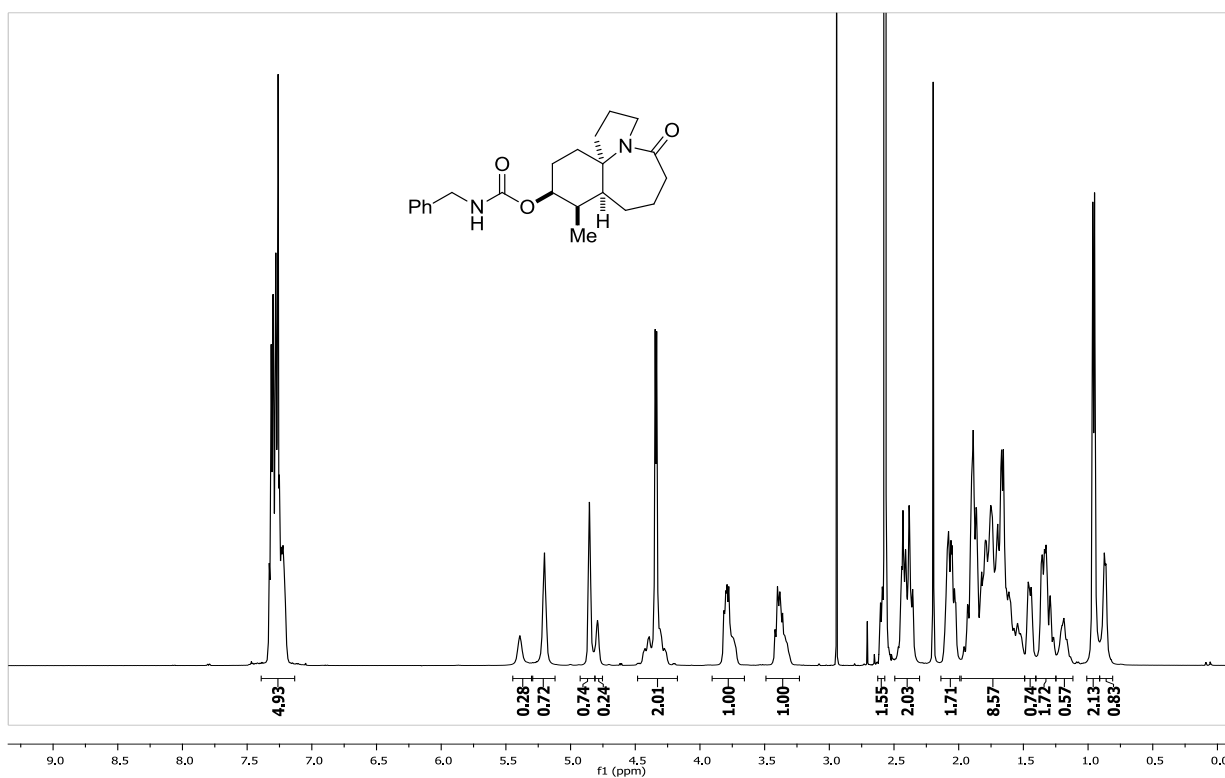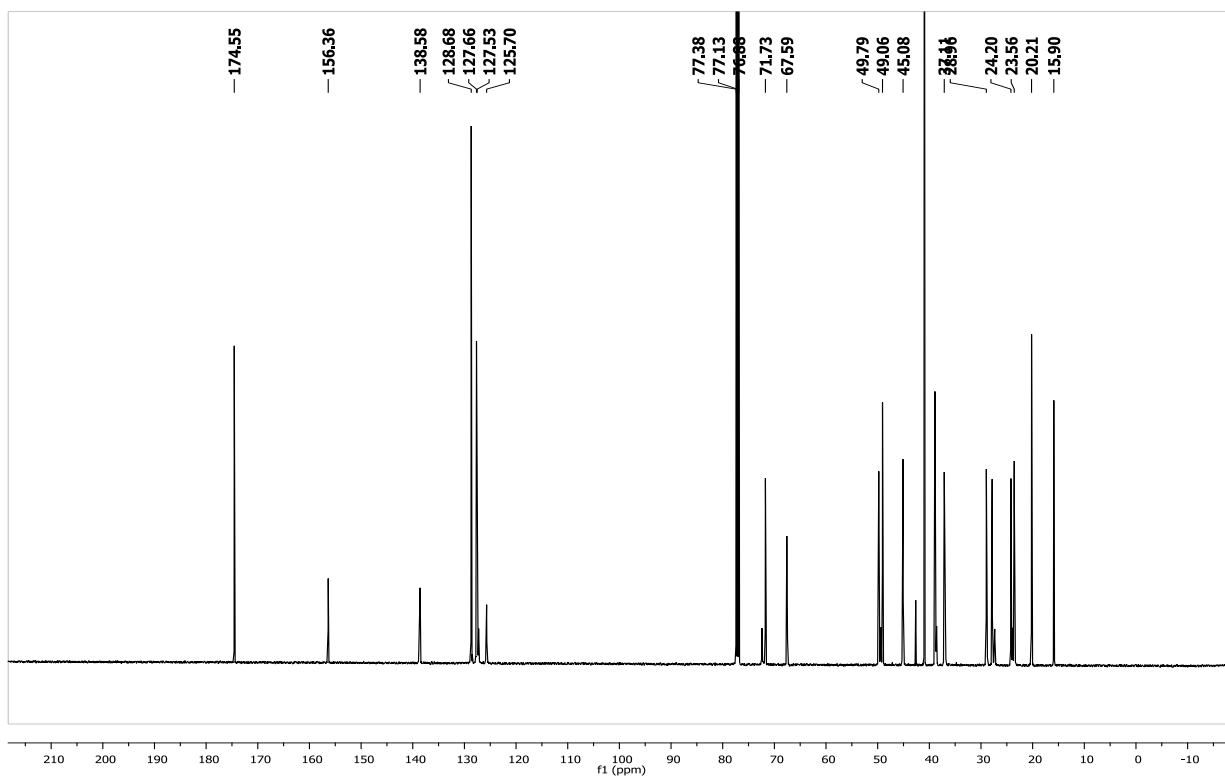

27c{4}

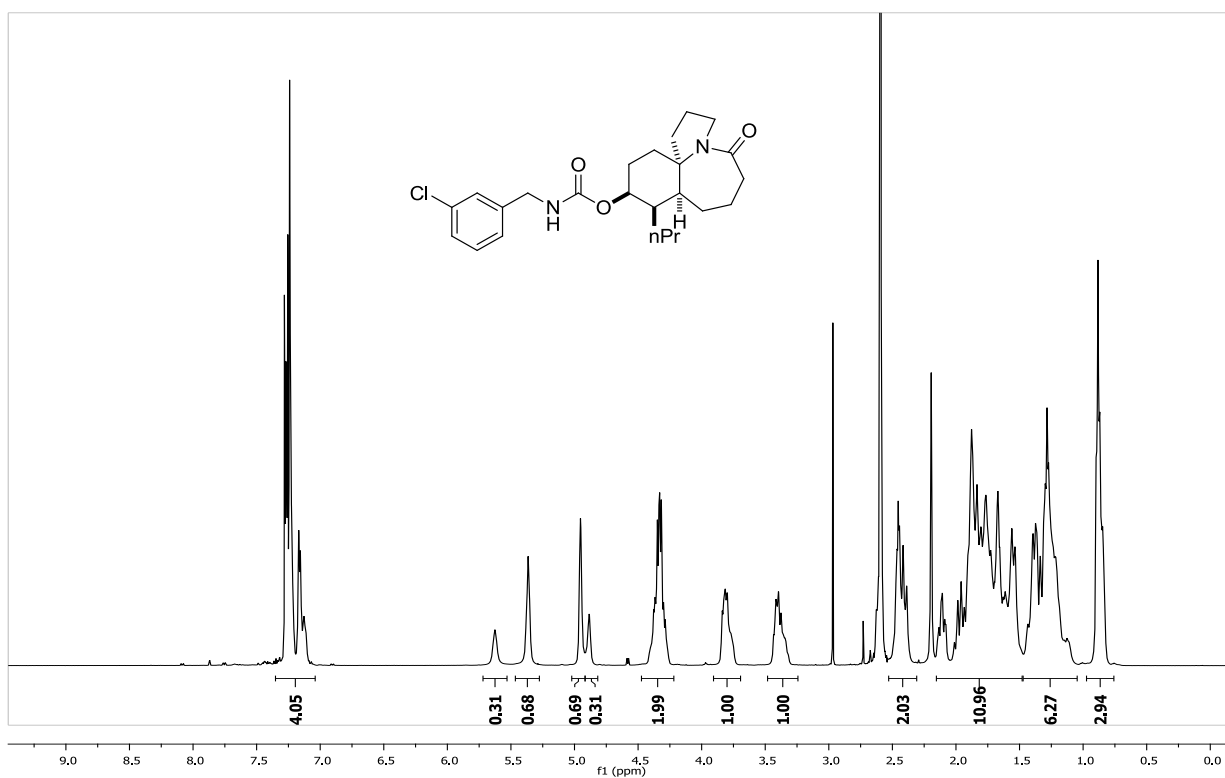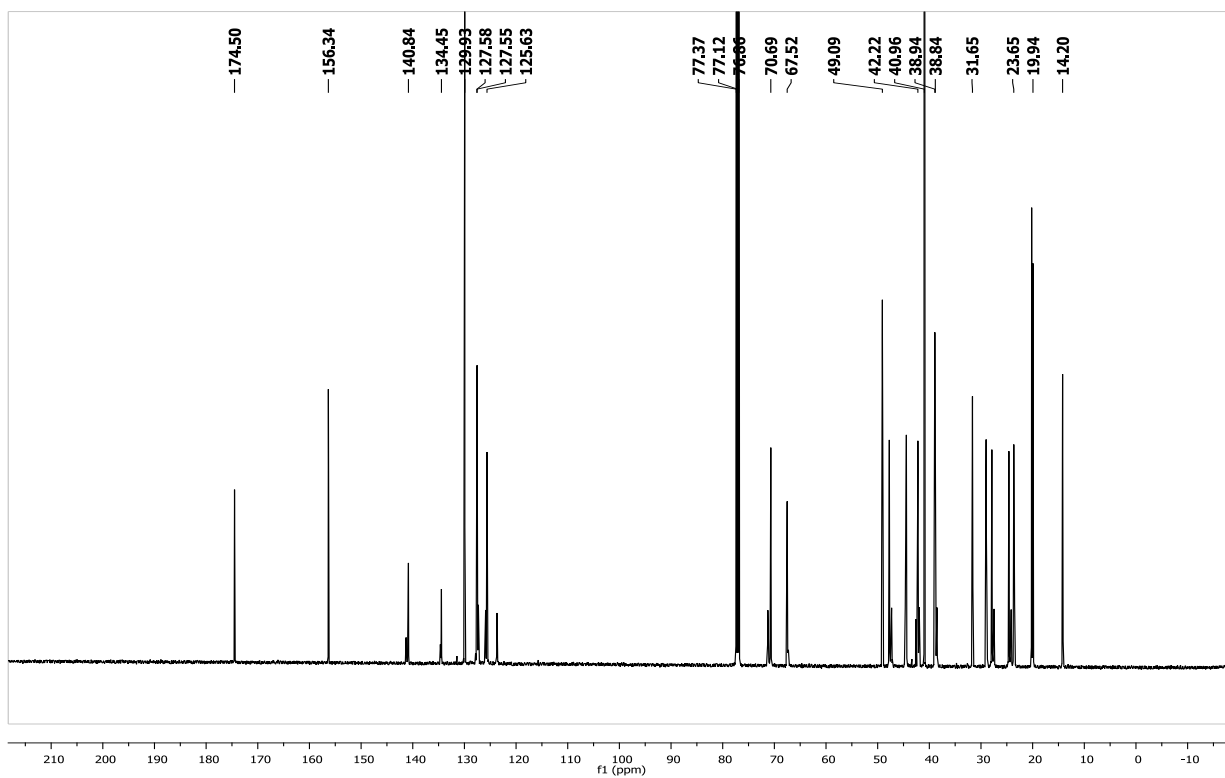

27d{19}

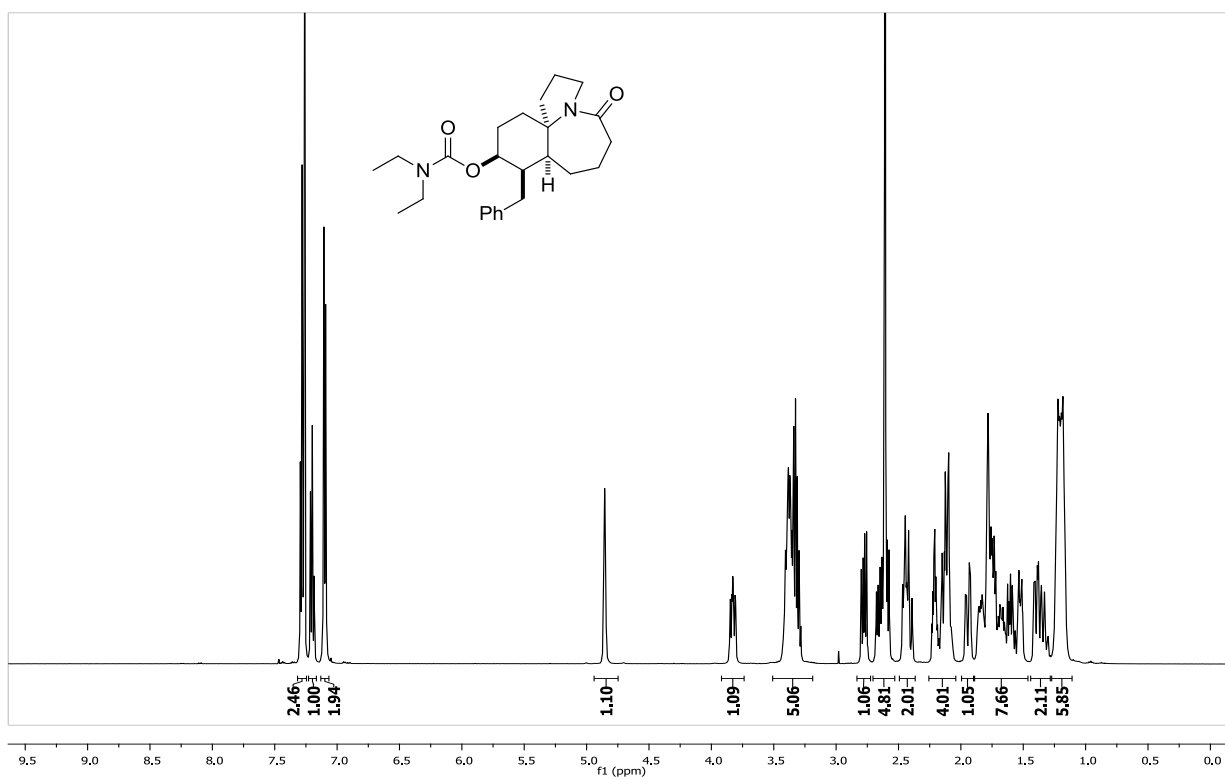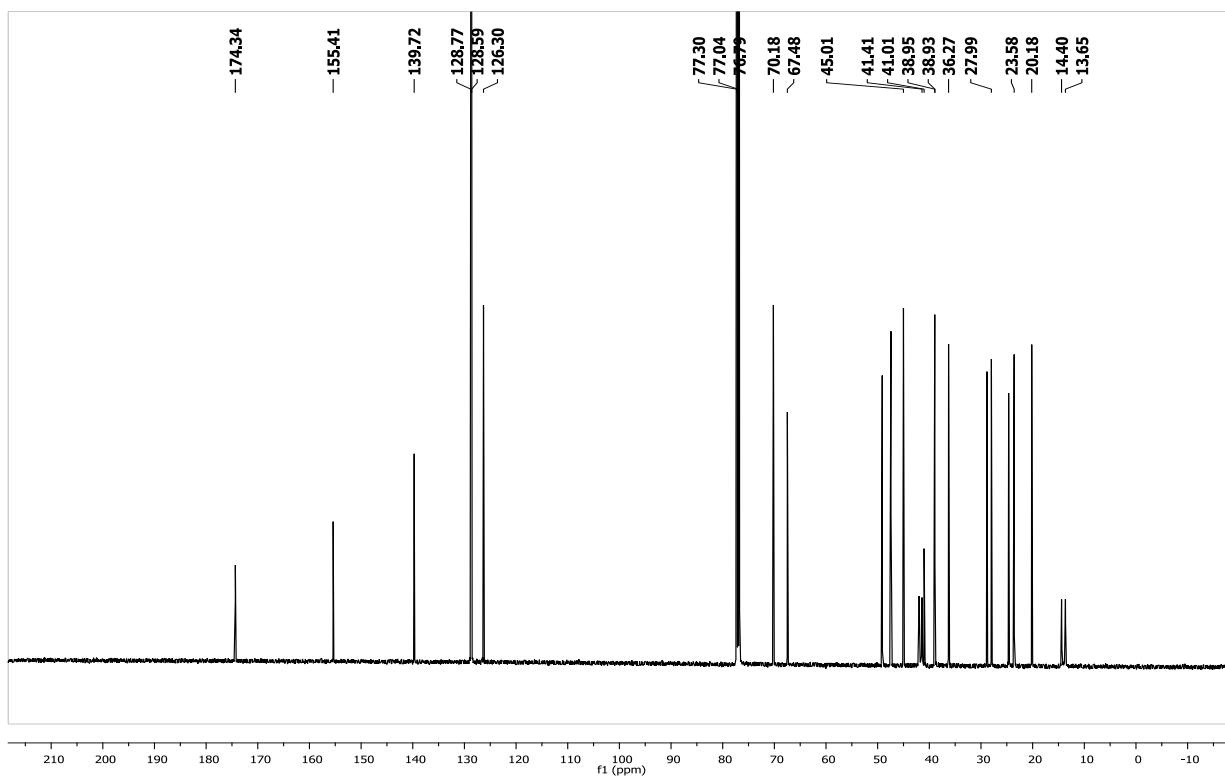

28b{3}

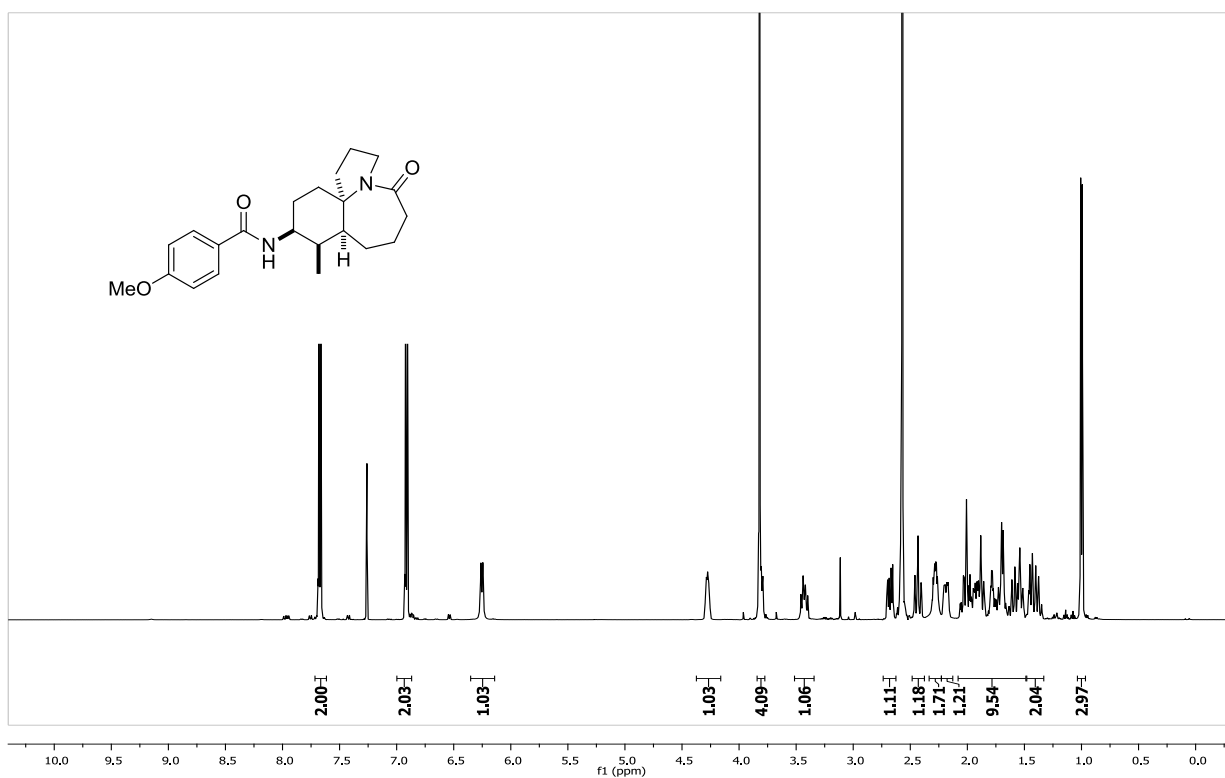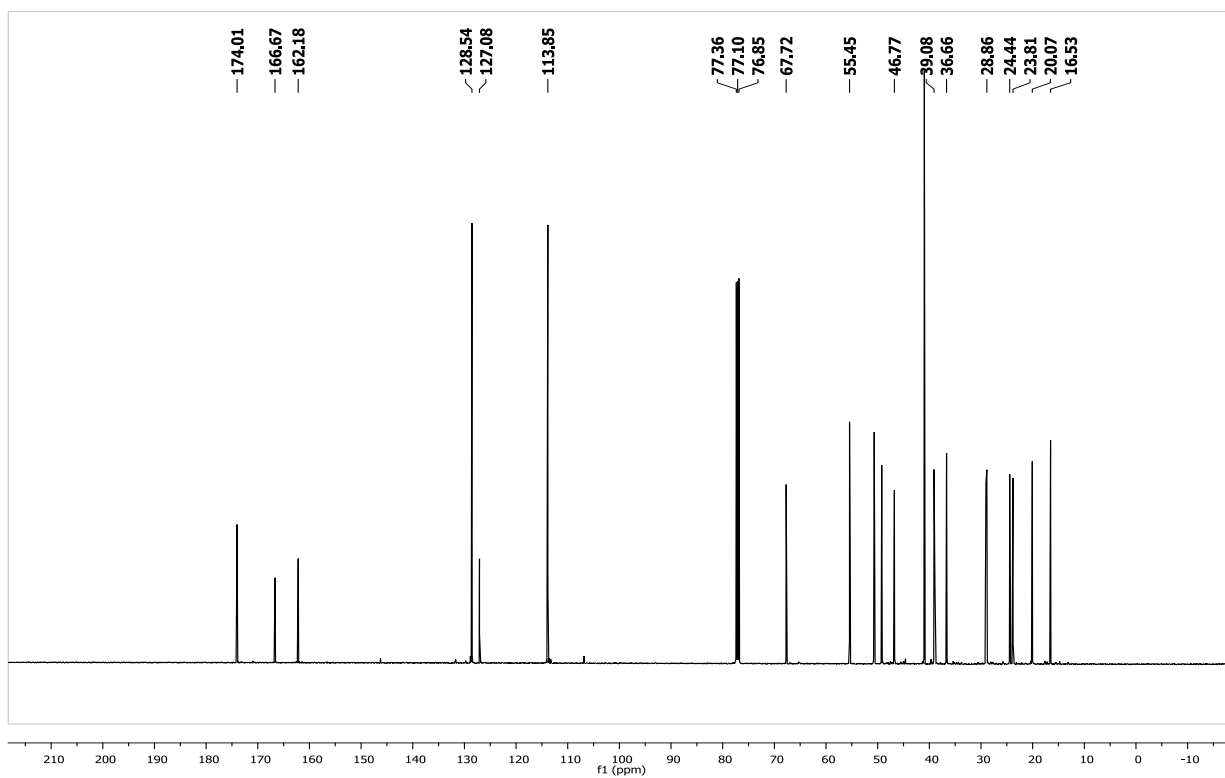

28c{8}

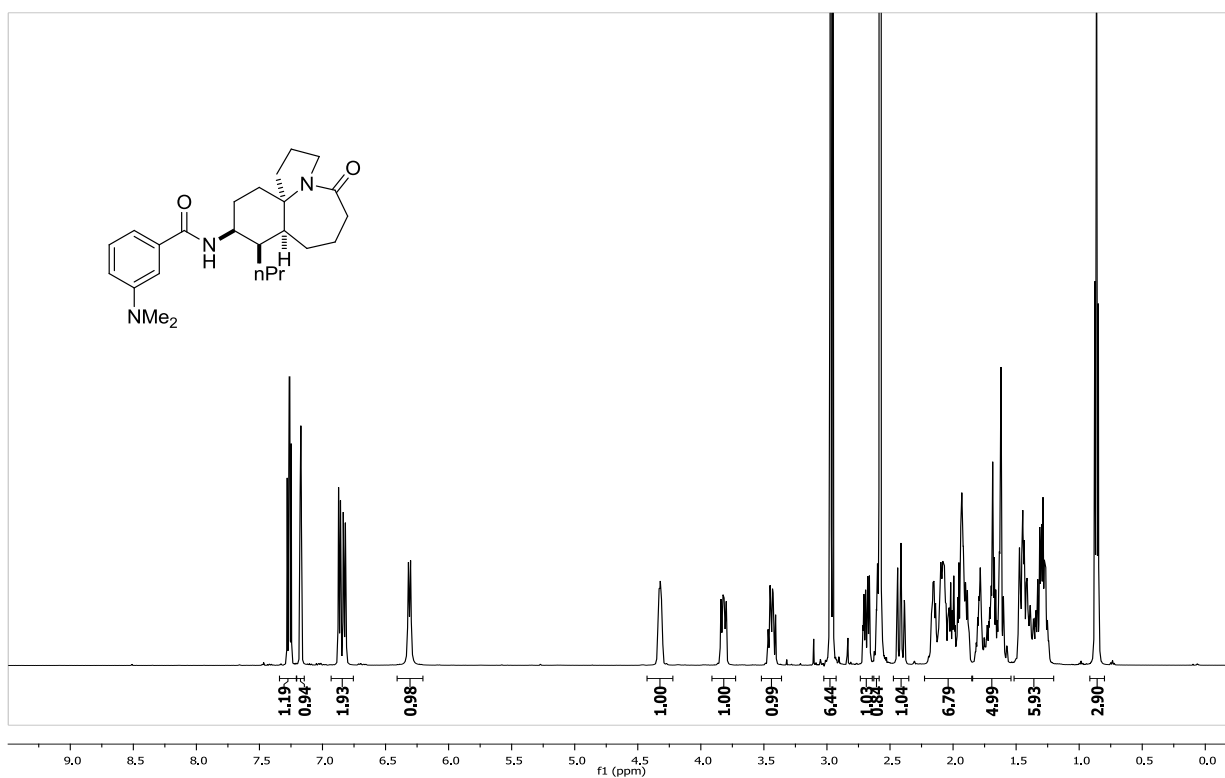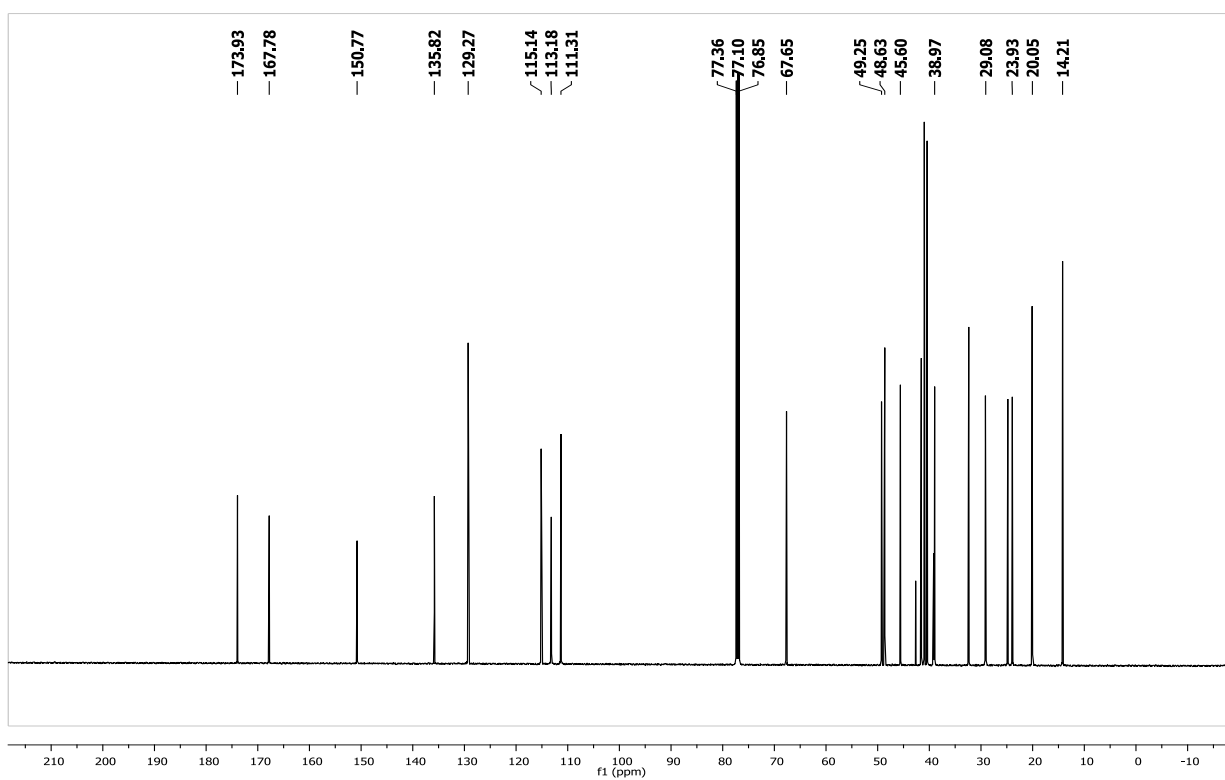



28c{13}

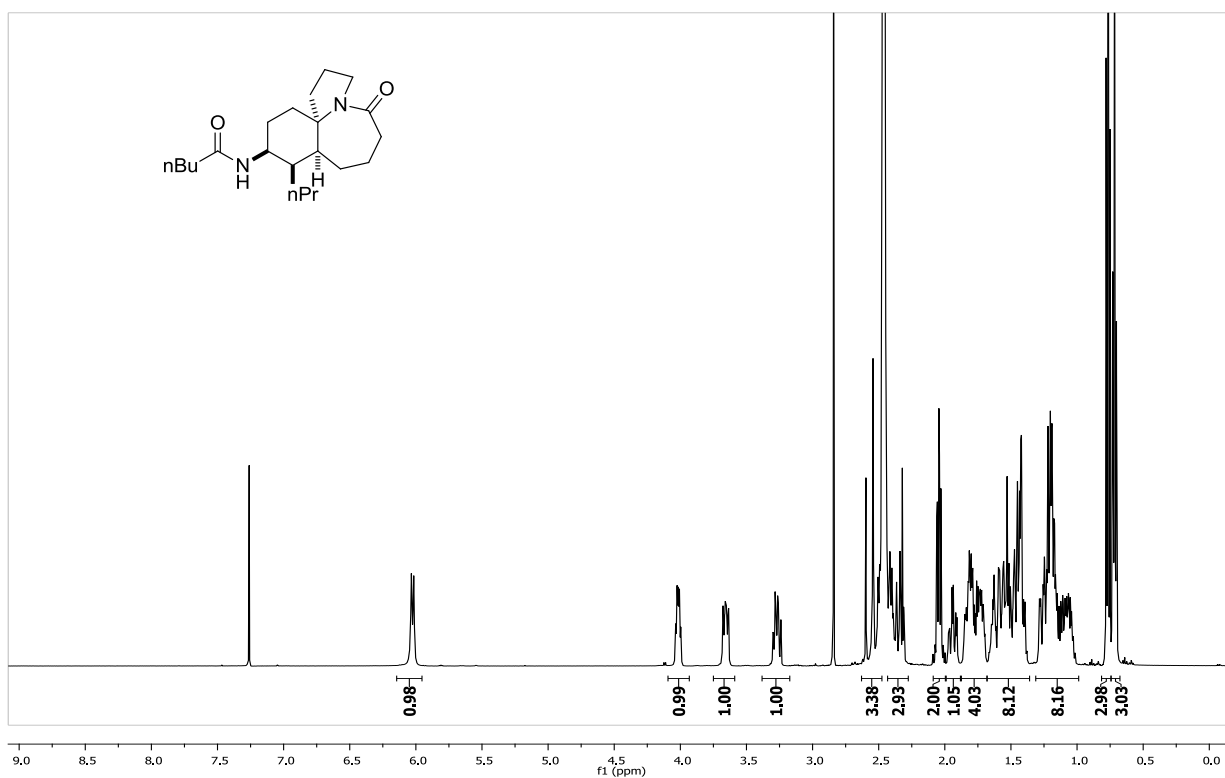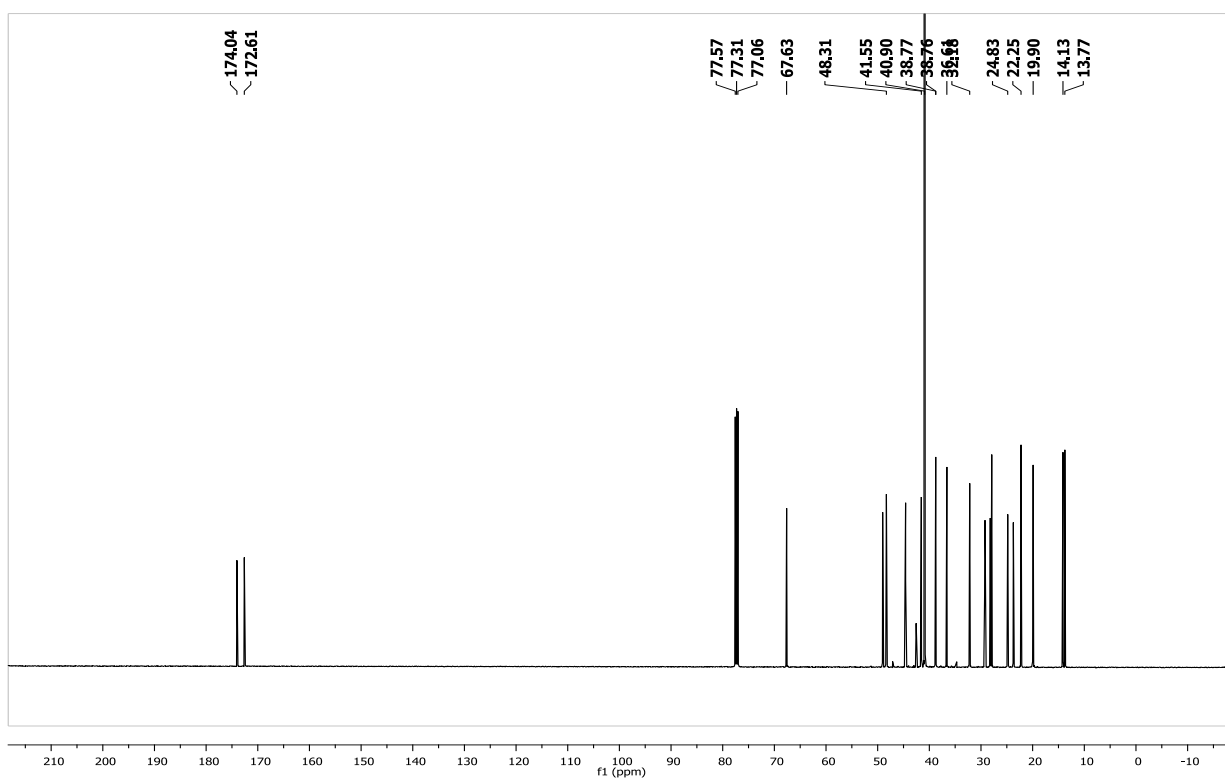



29b{2}

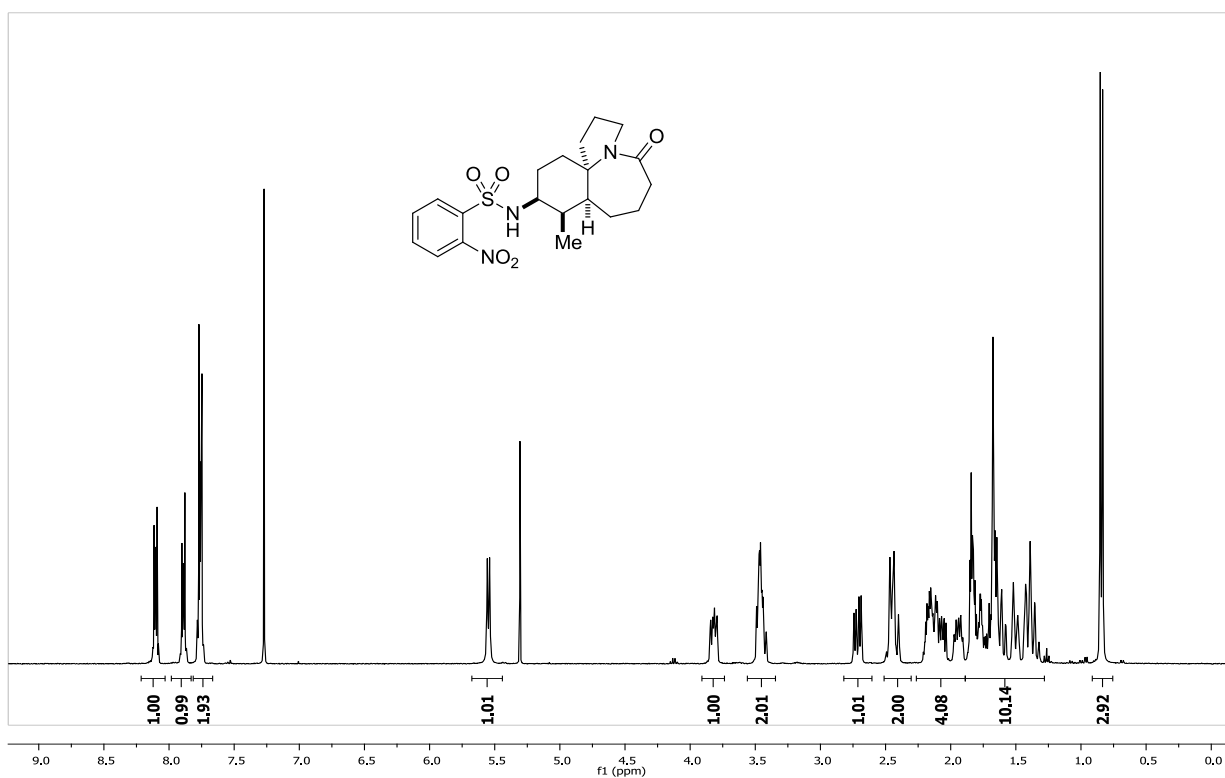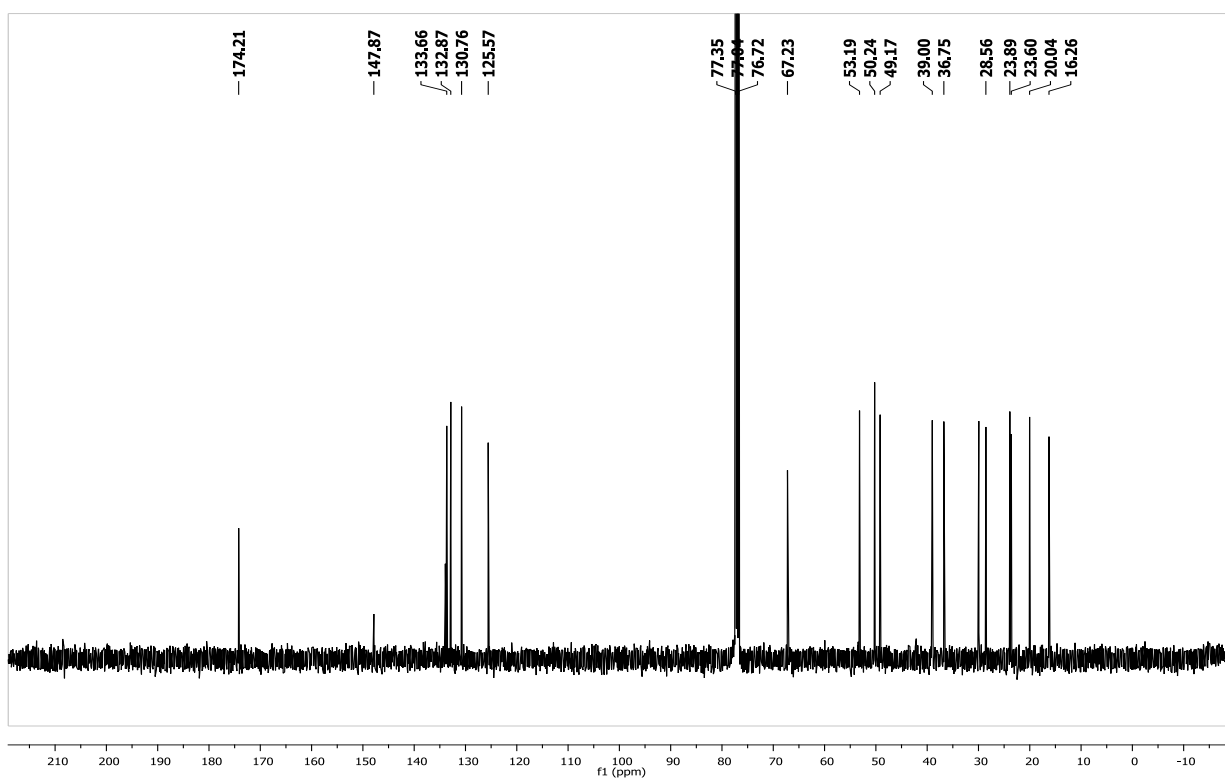

29c{8}

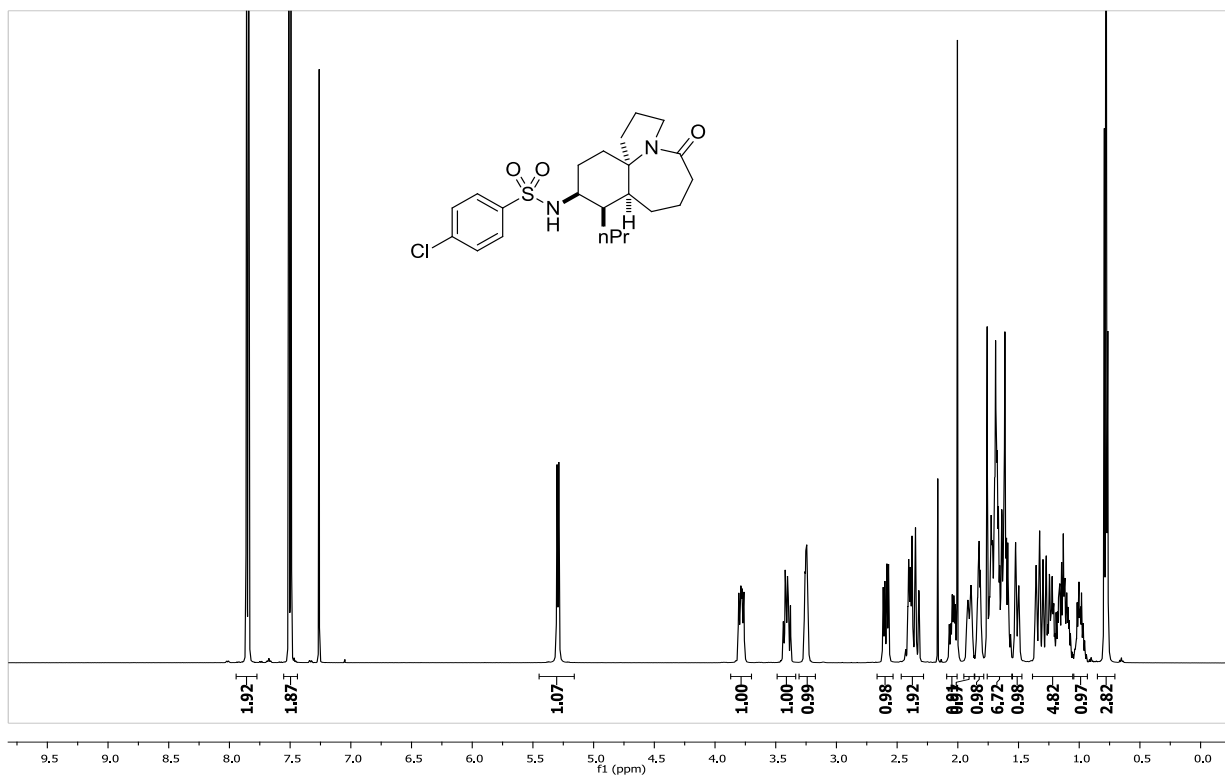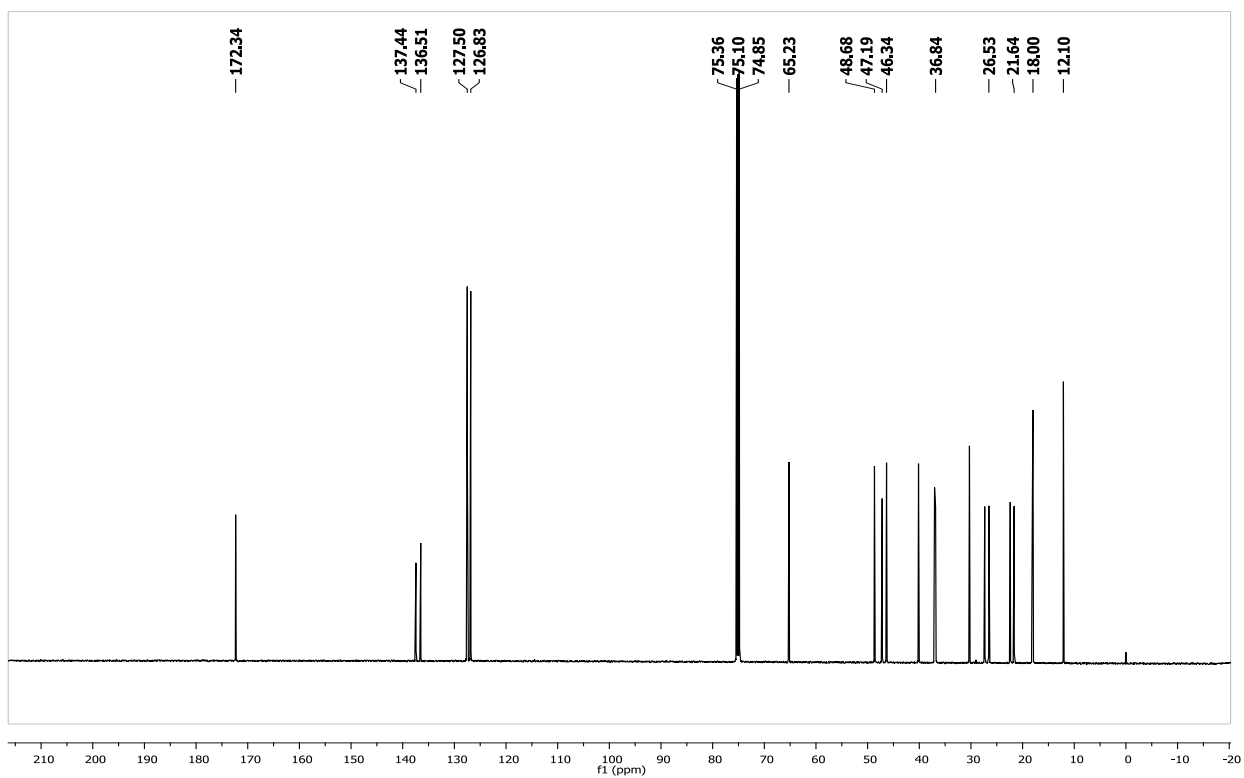

29d{19}

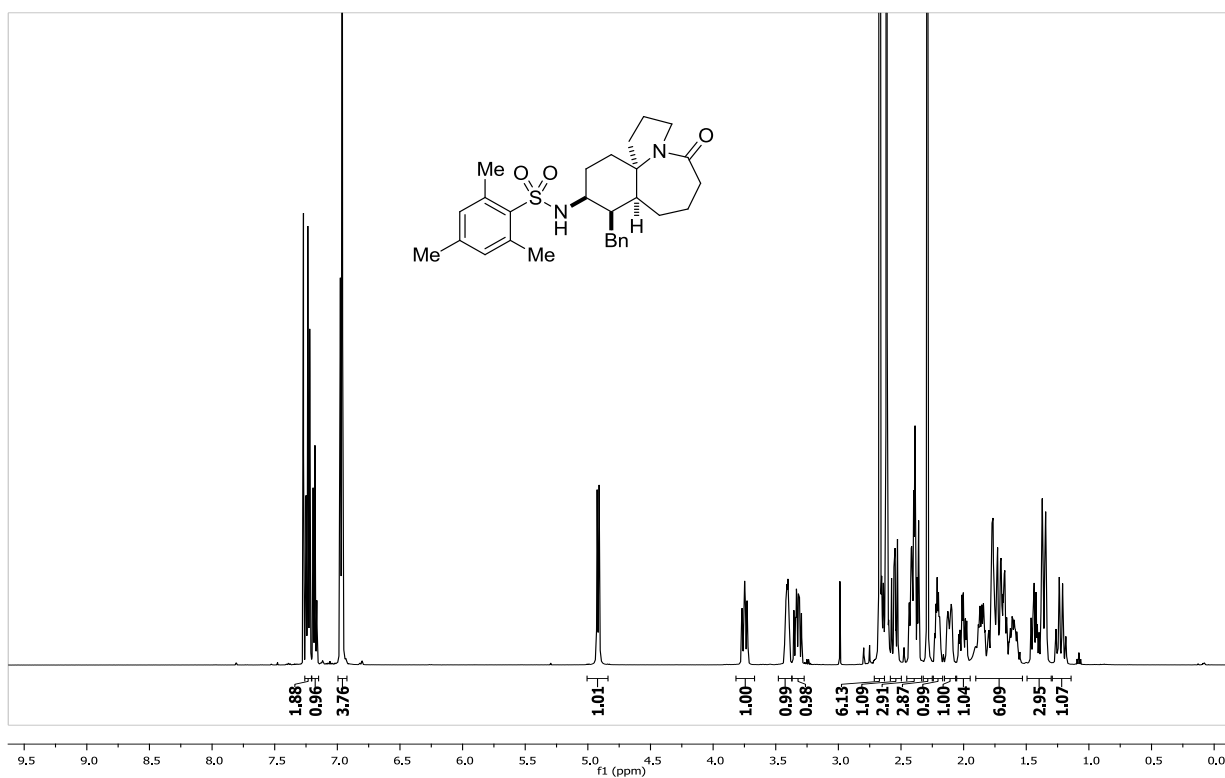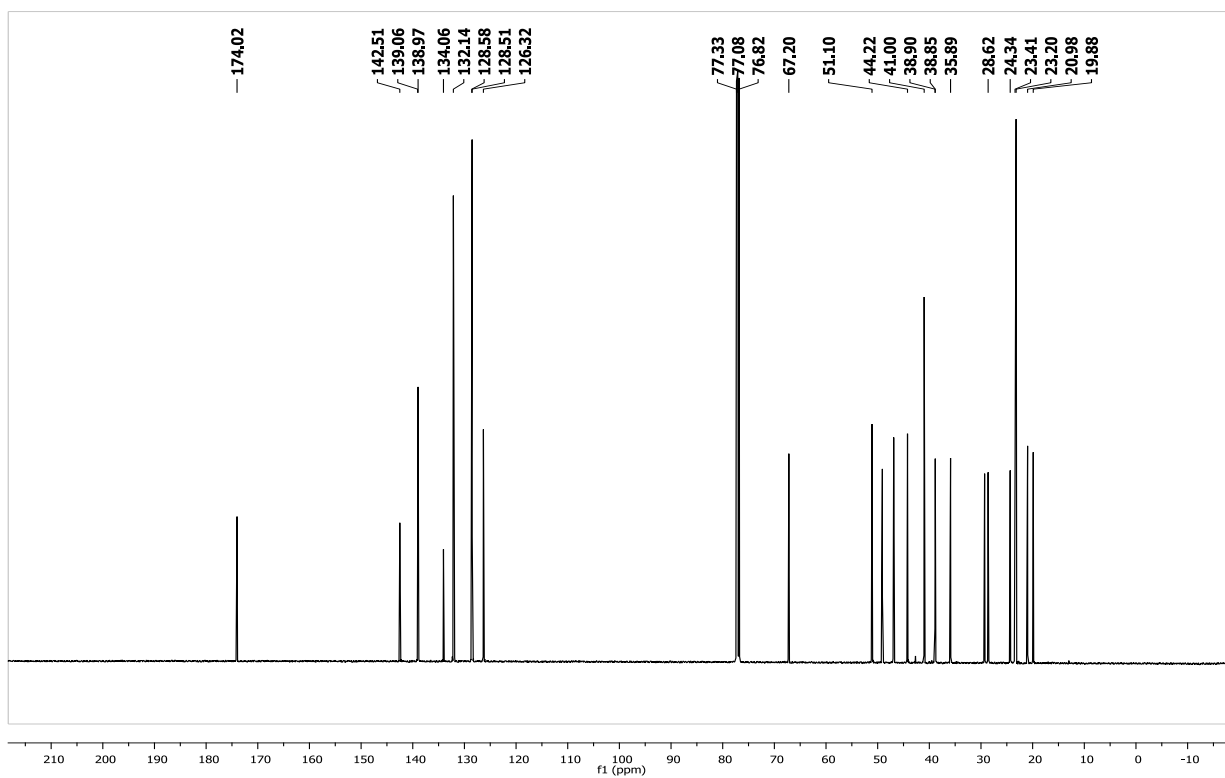

29d{22}

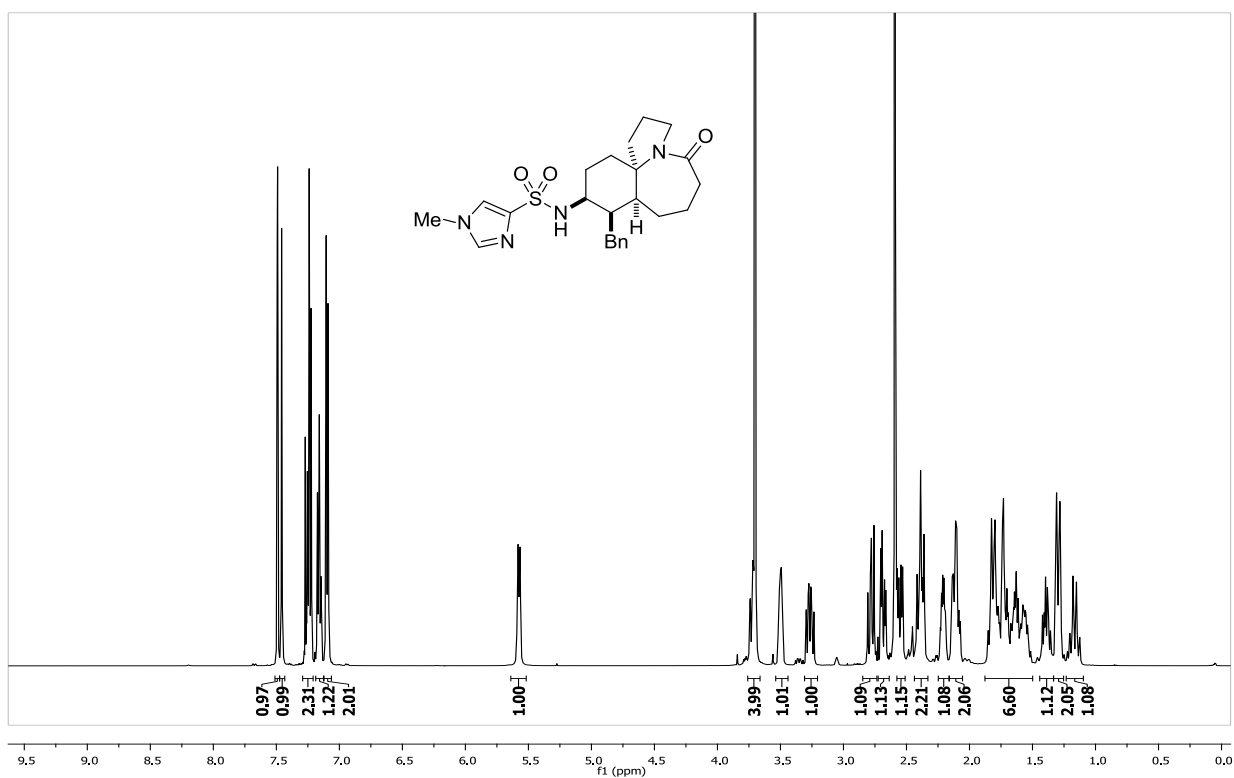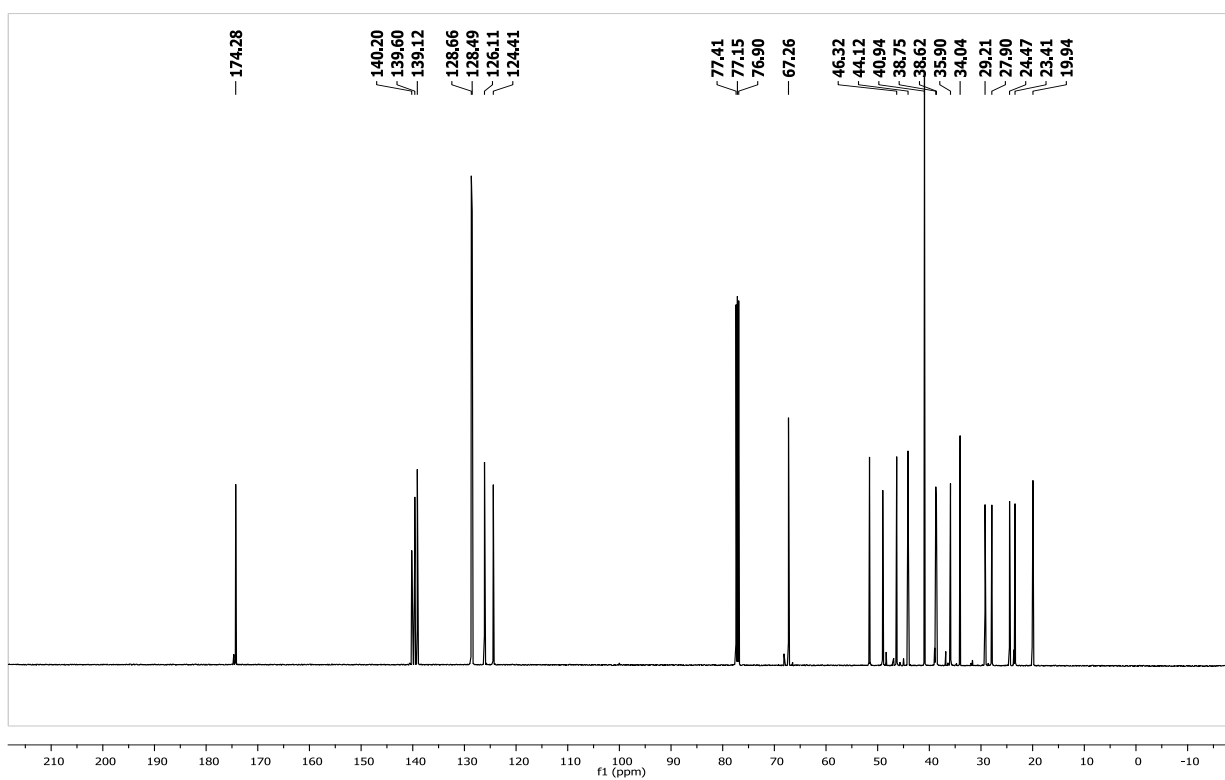

30d{21}

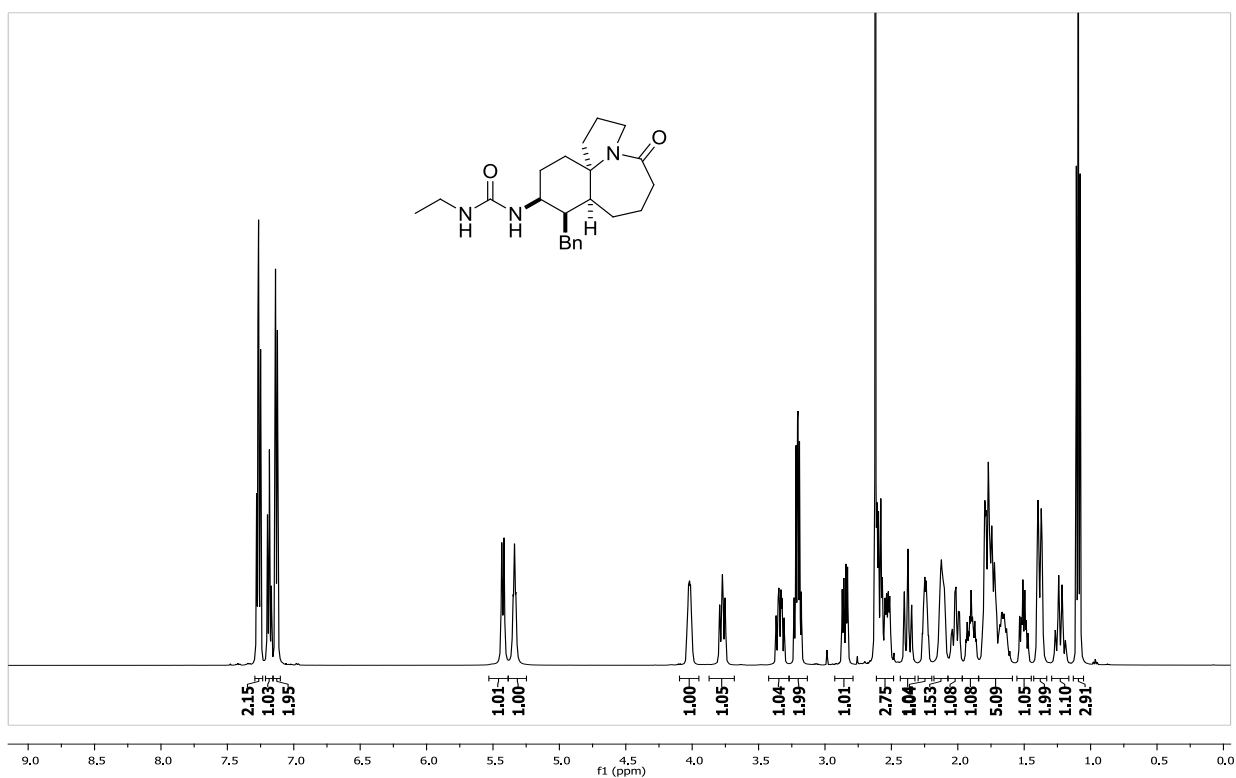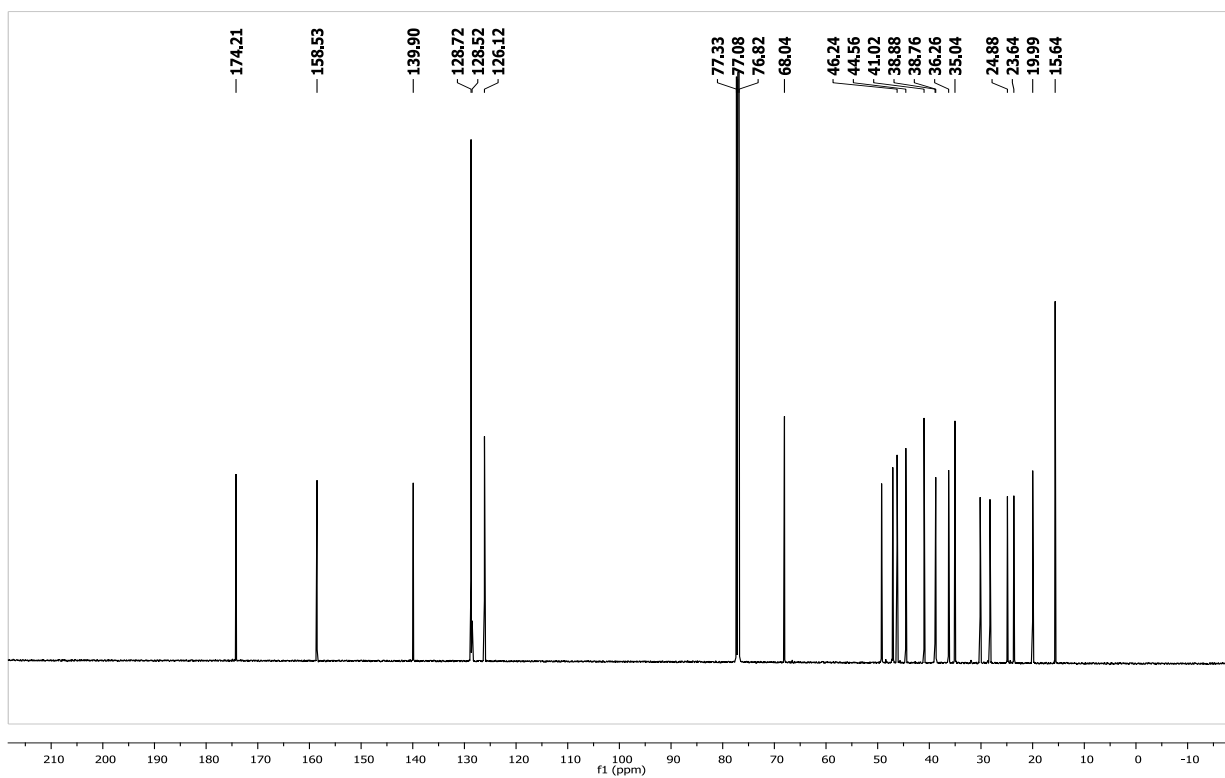

26d{1}

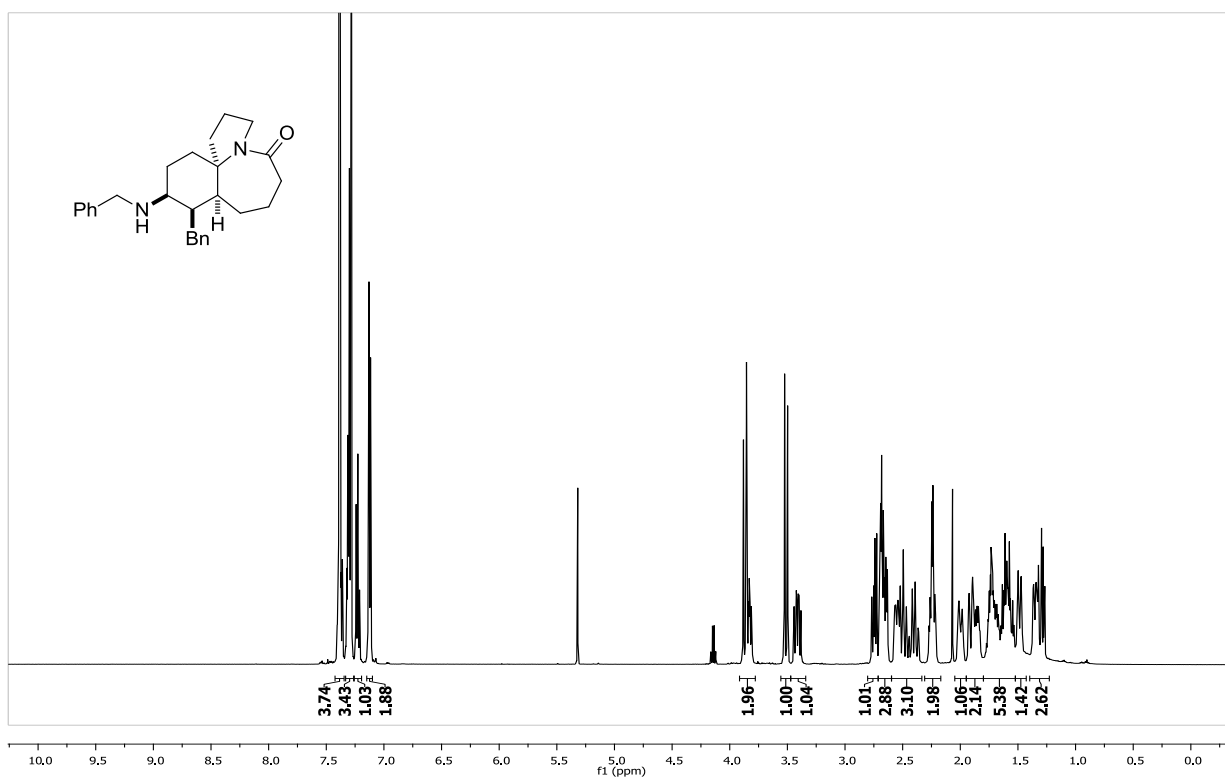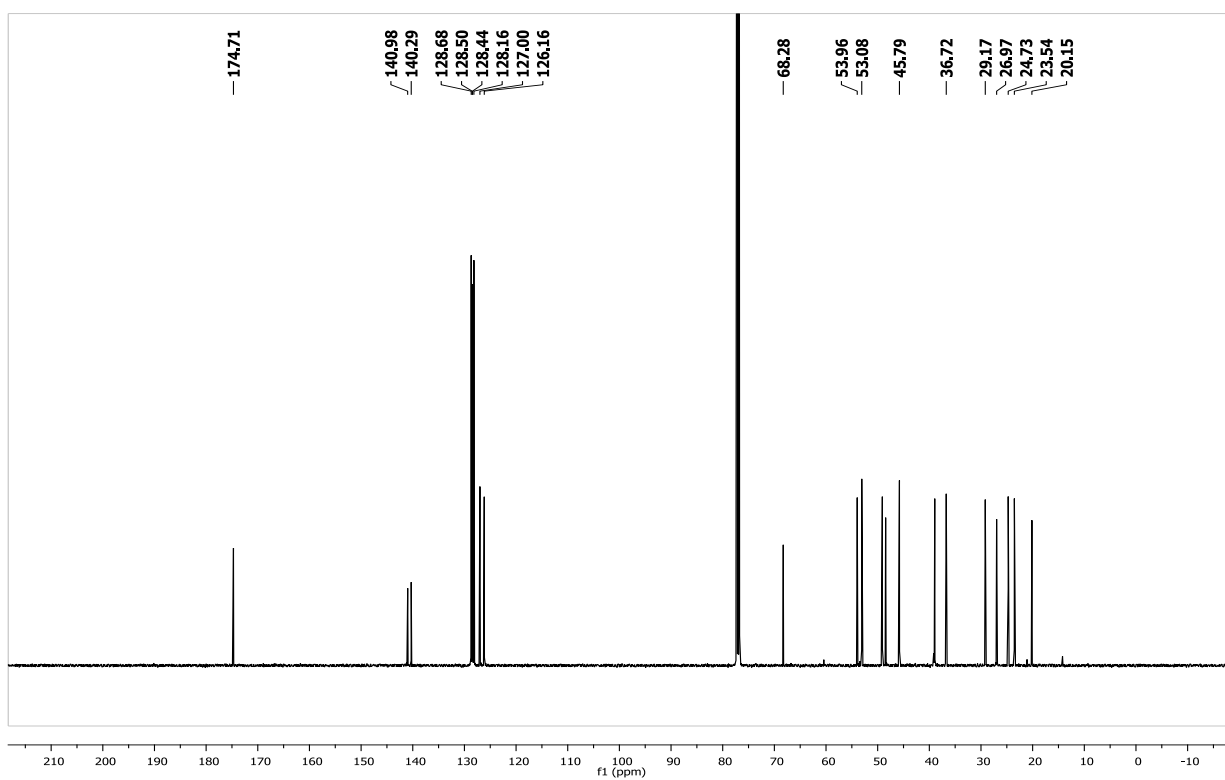



32b{2}

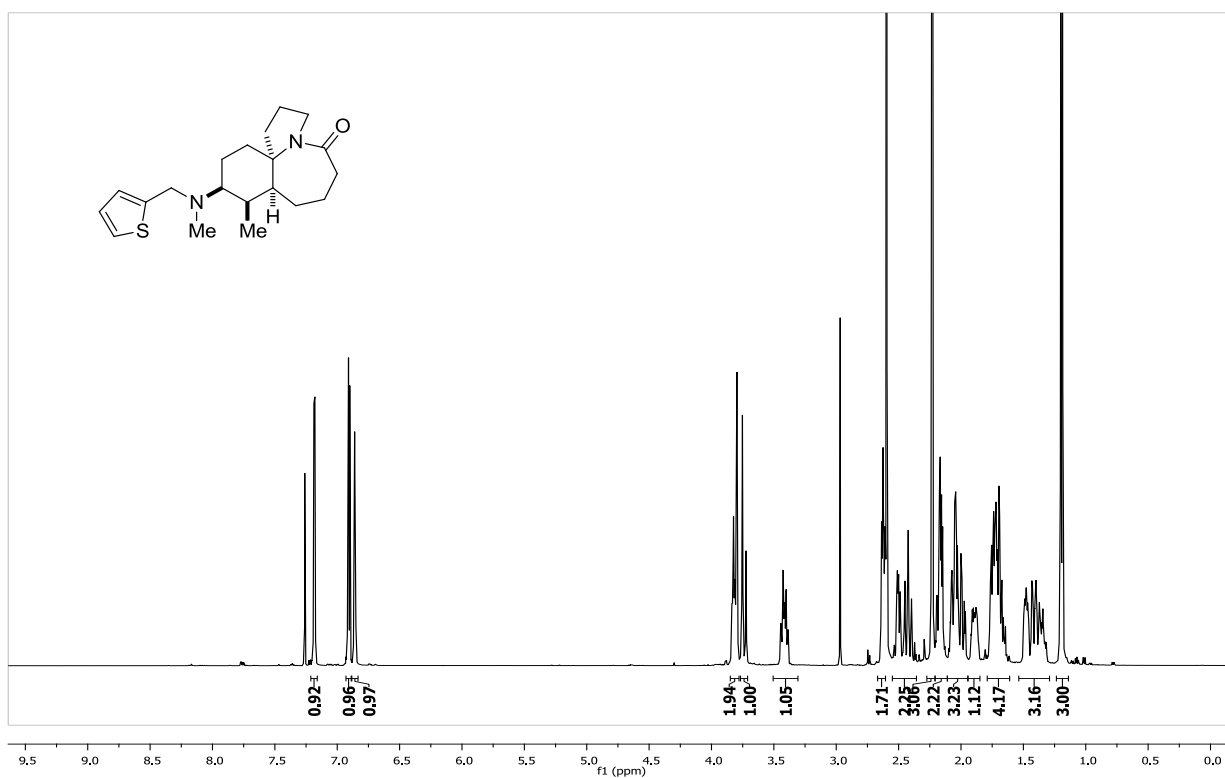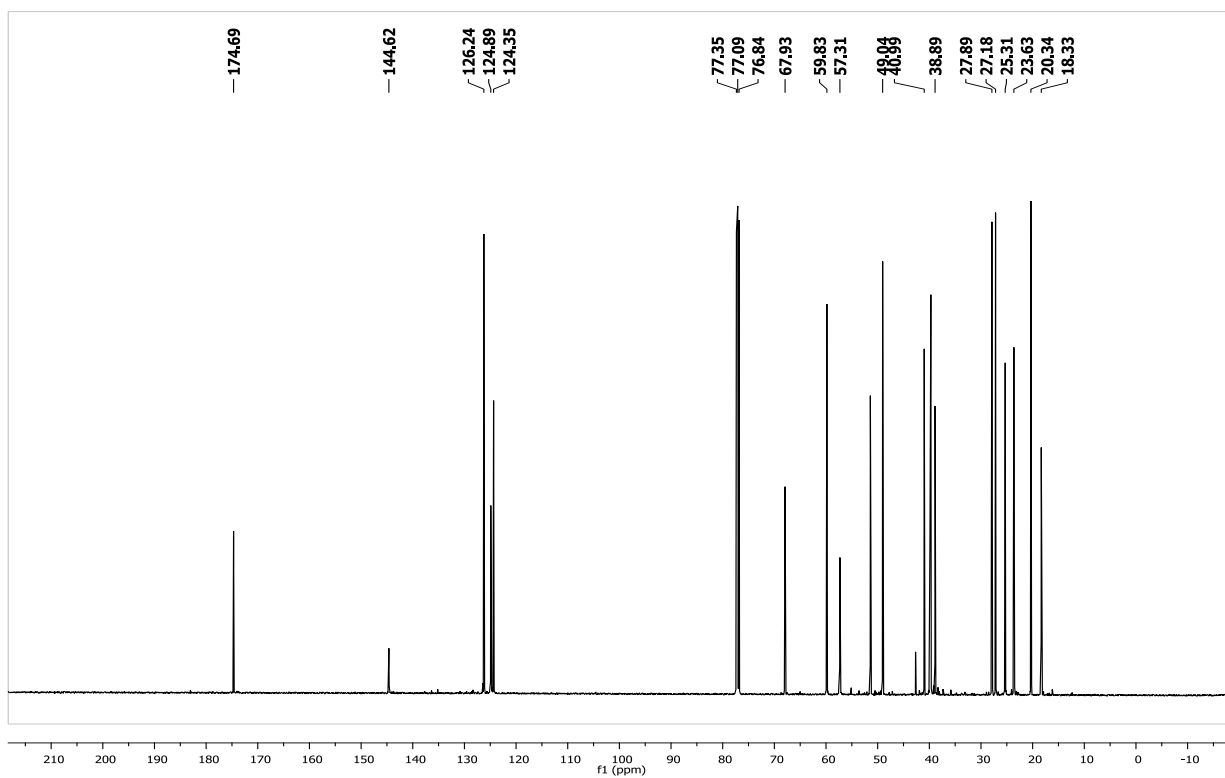

31b

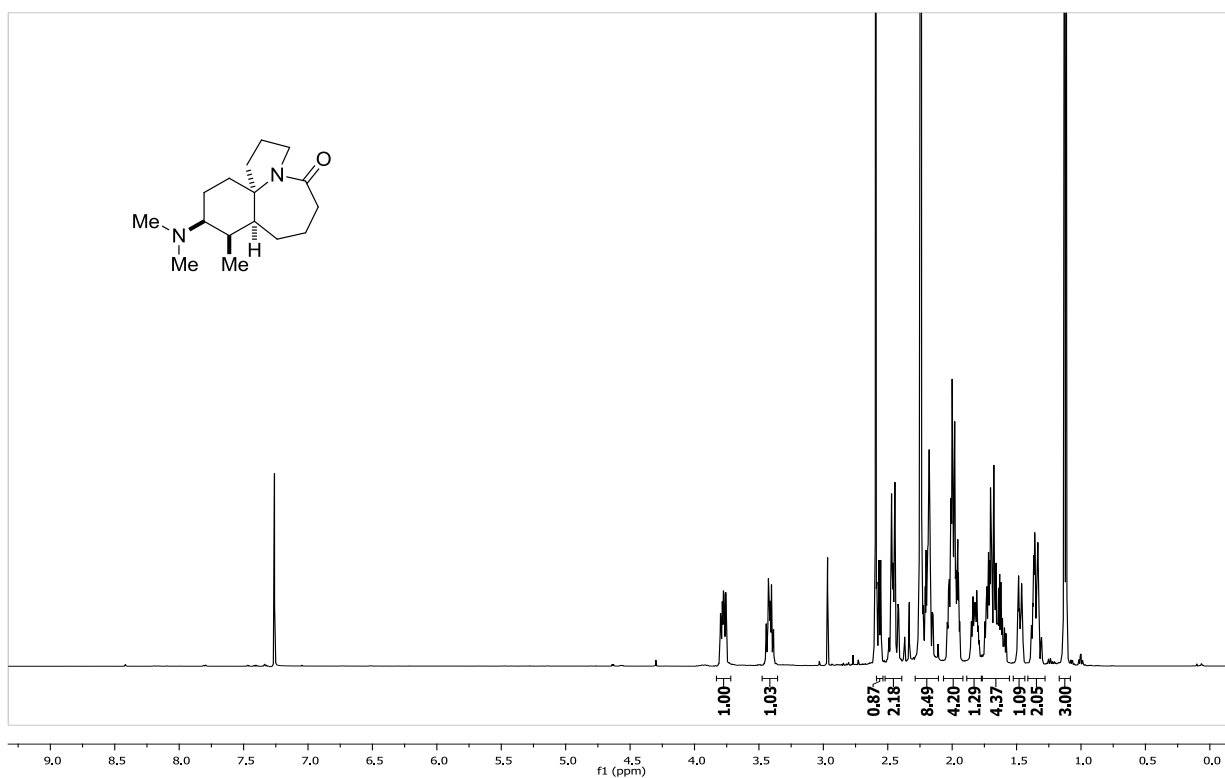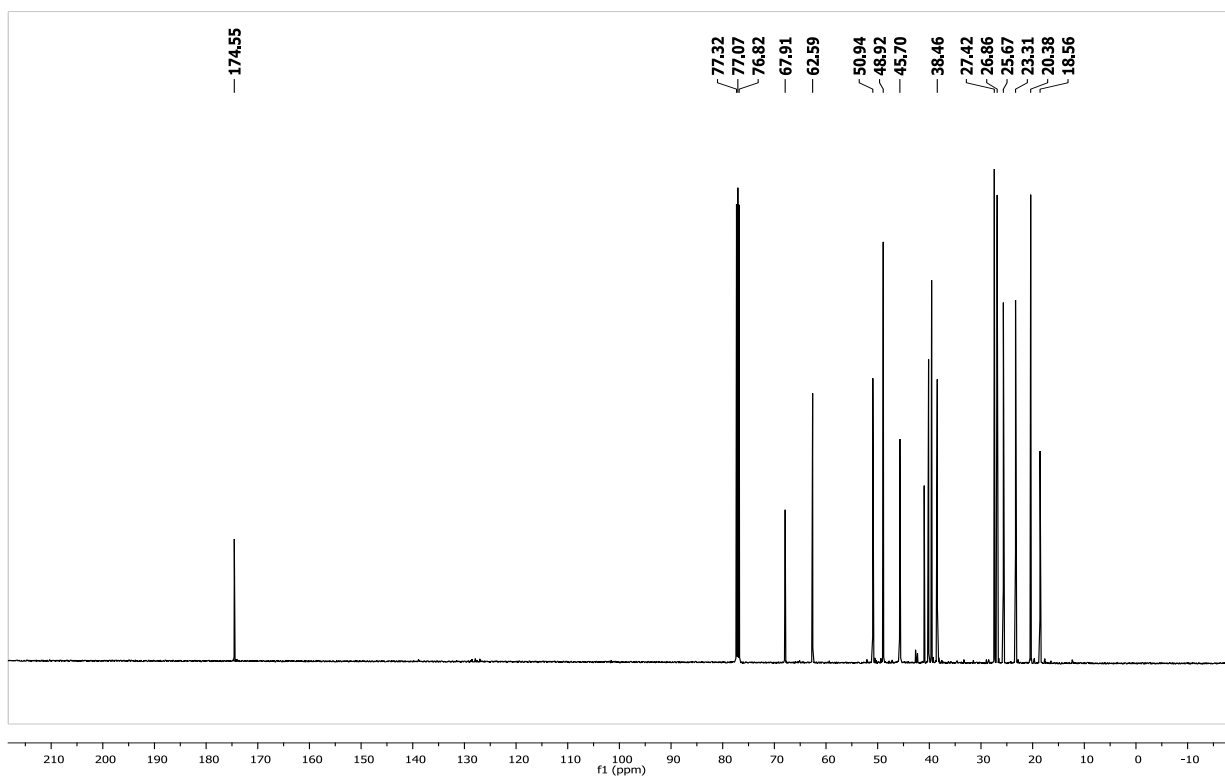

Cylindricine-inspired series

Ketone 6b

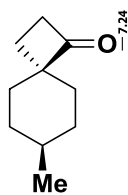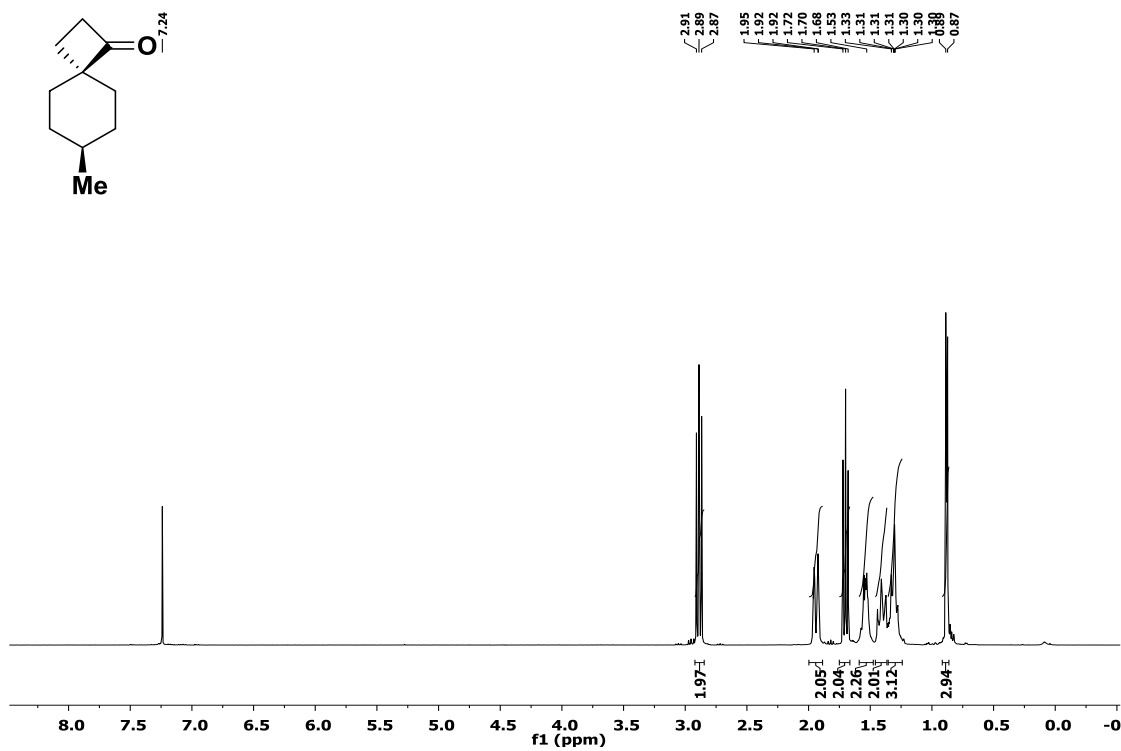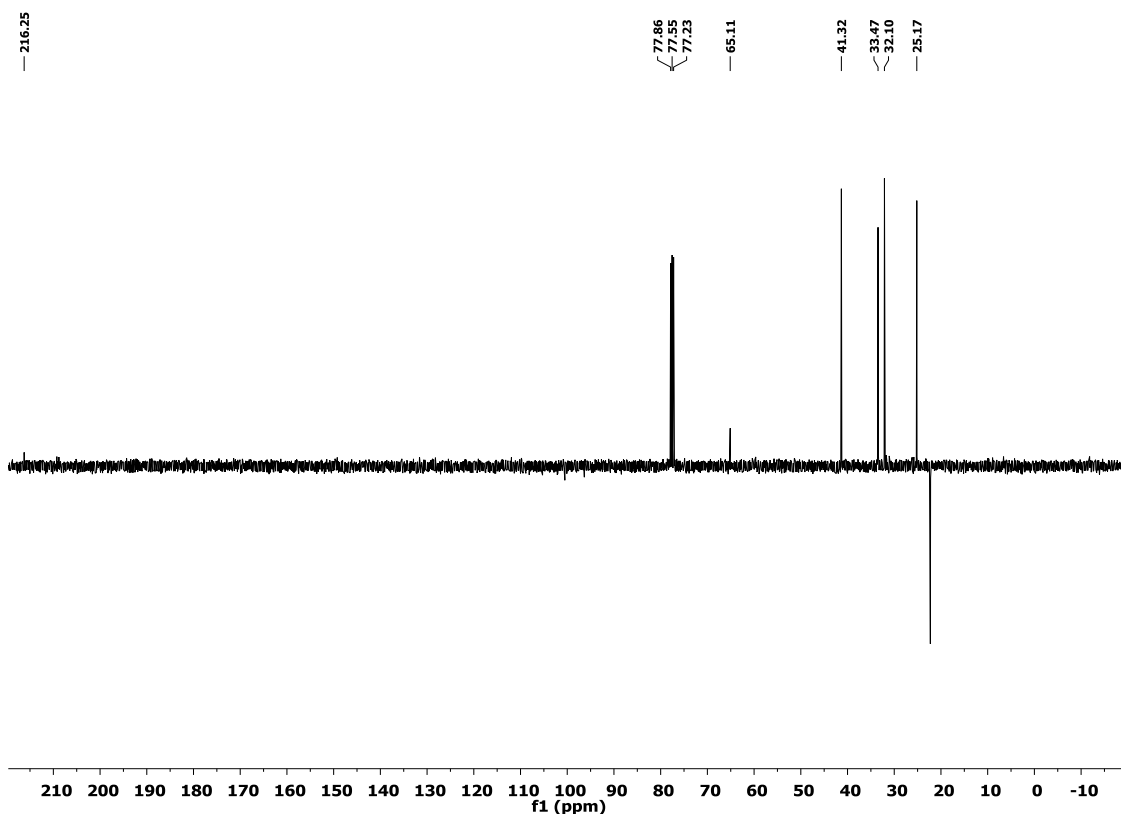

Ketone 6c

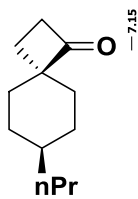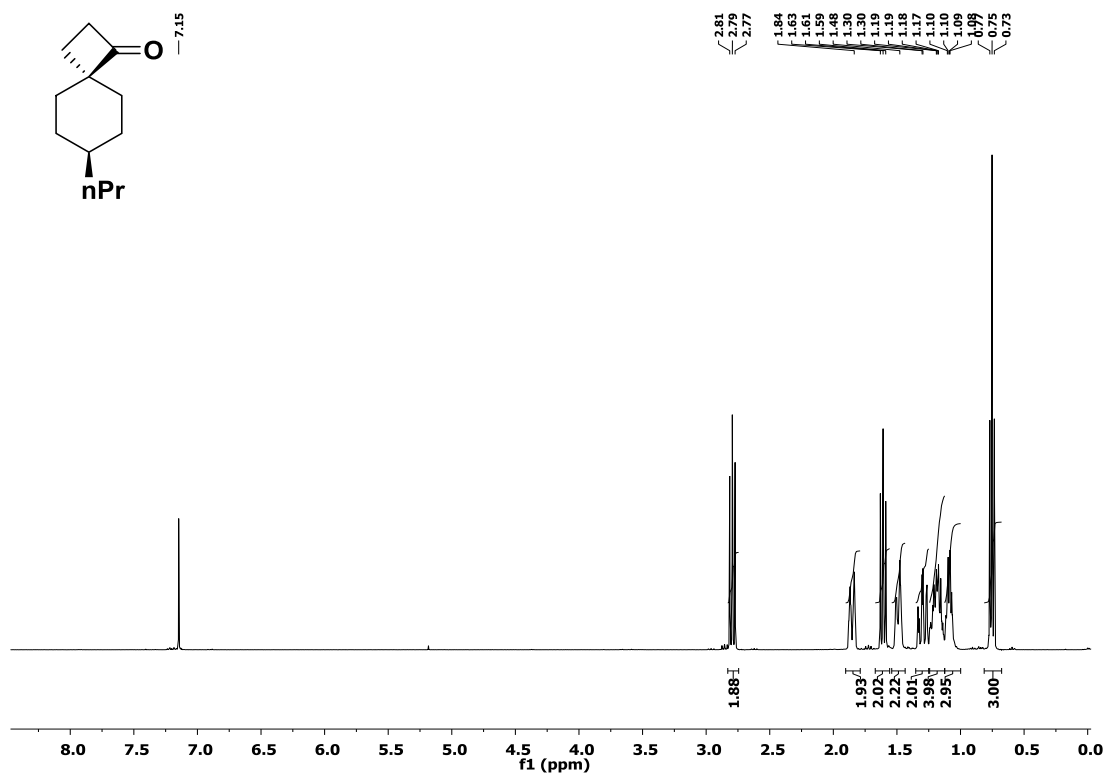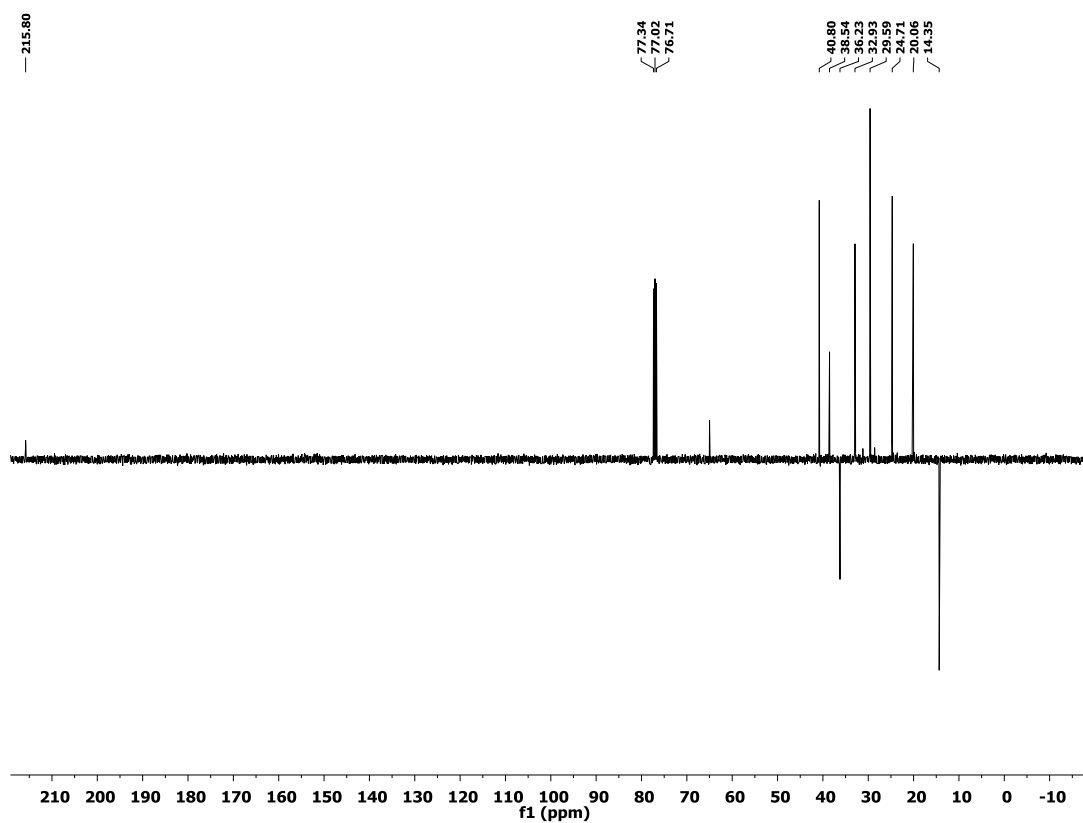

Ketone 6d

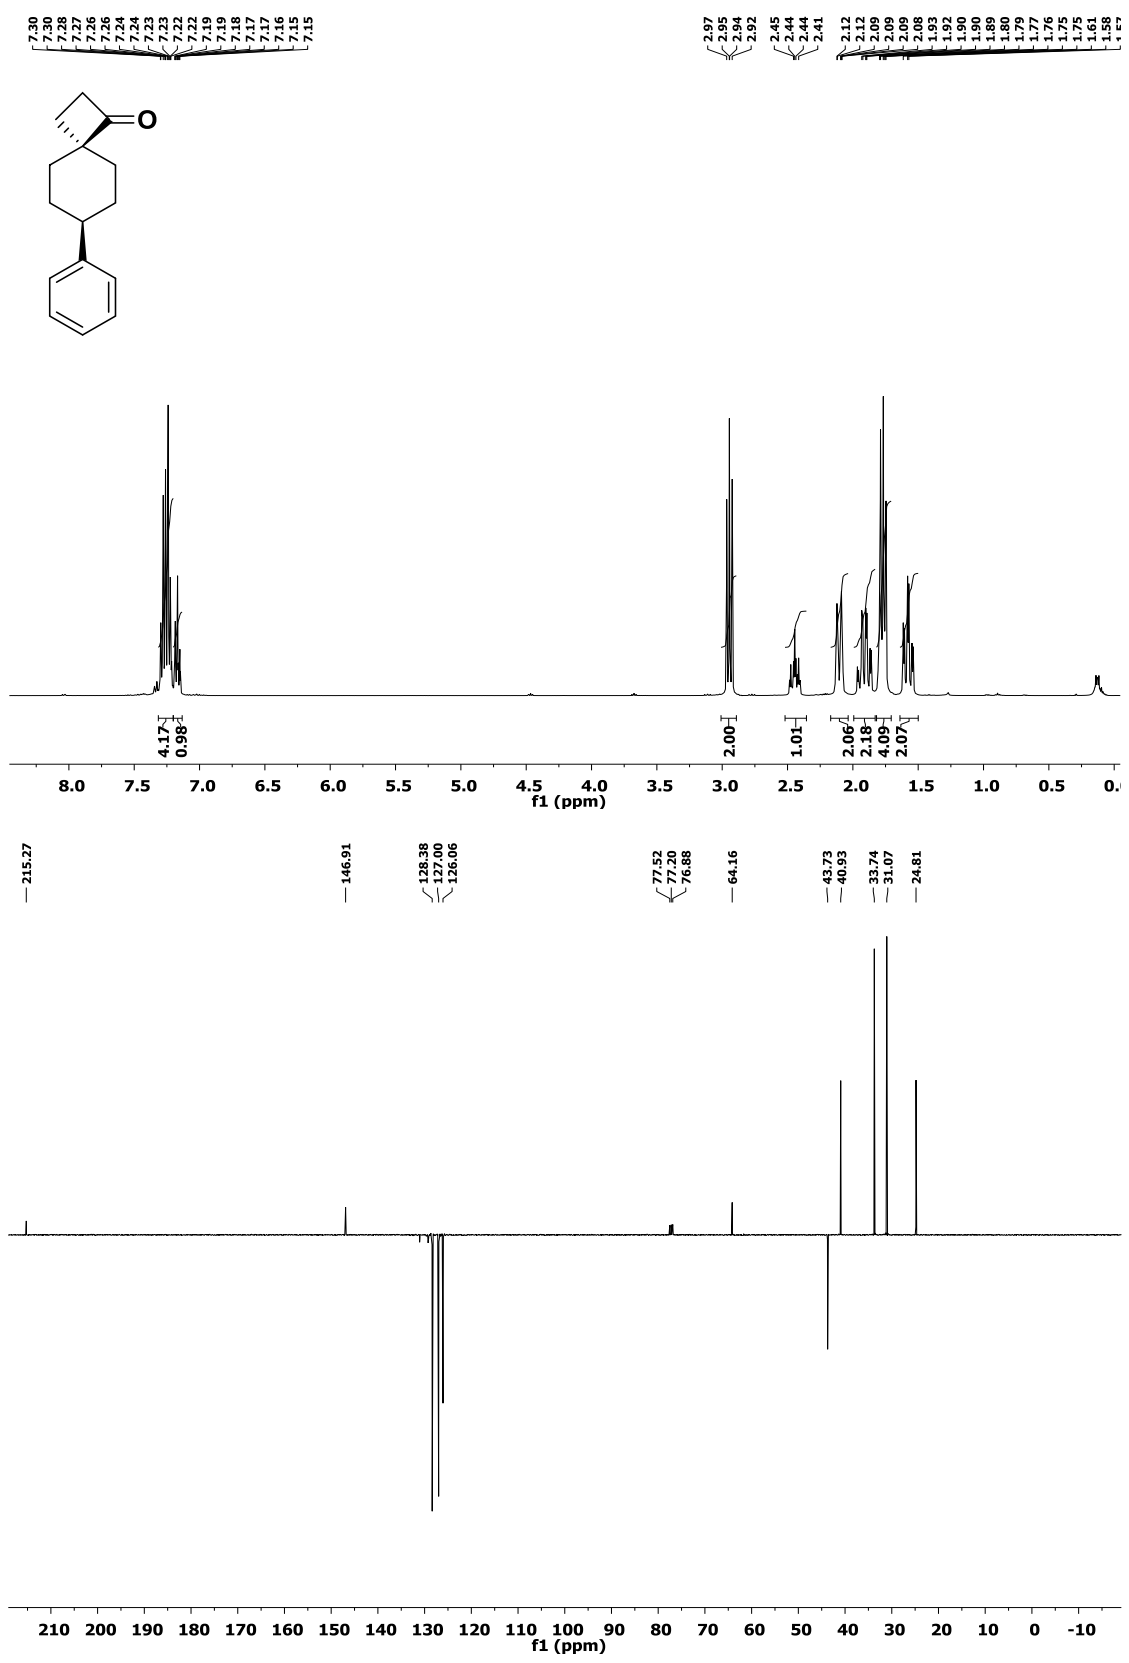

Ketone 6e

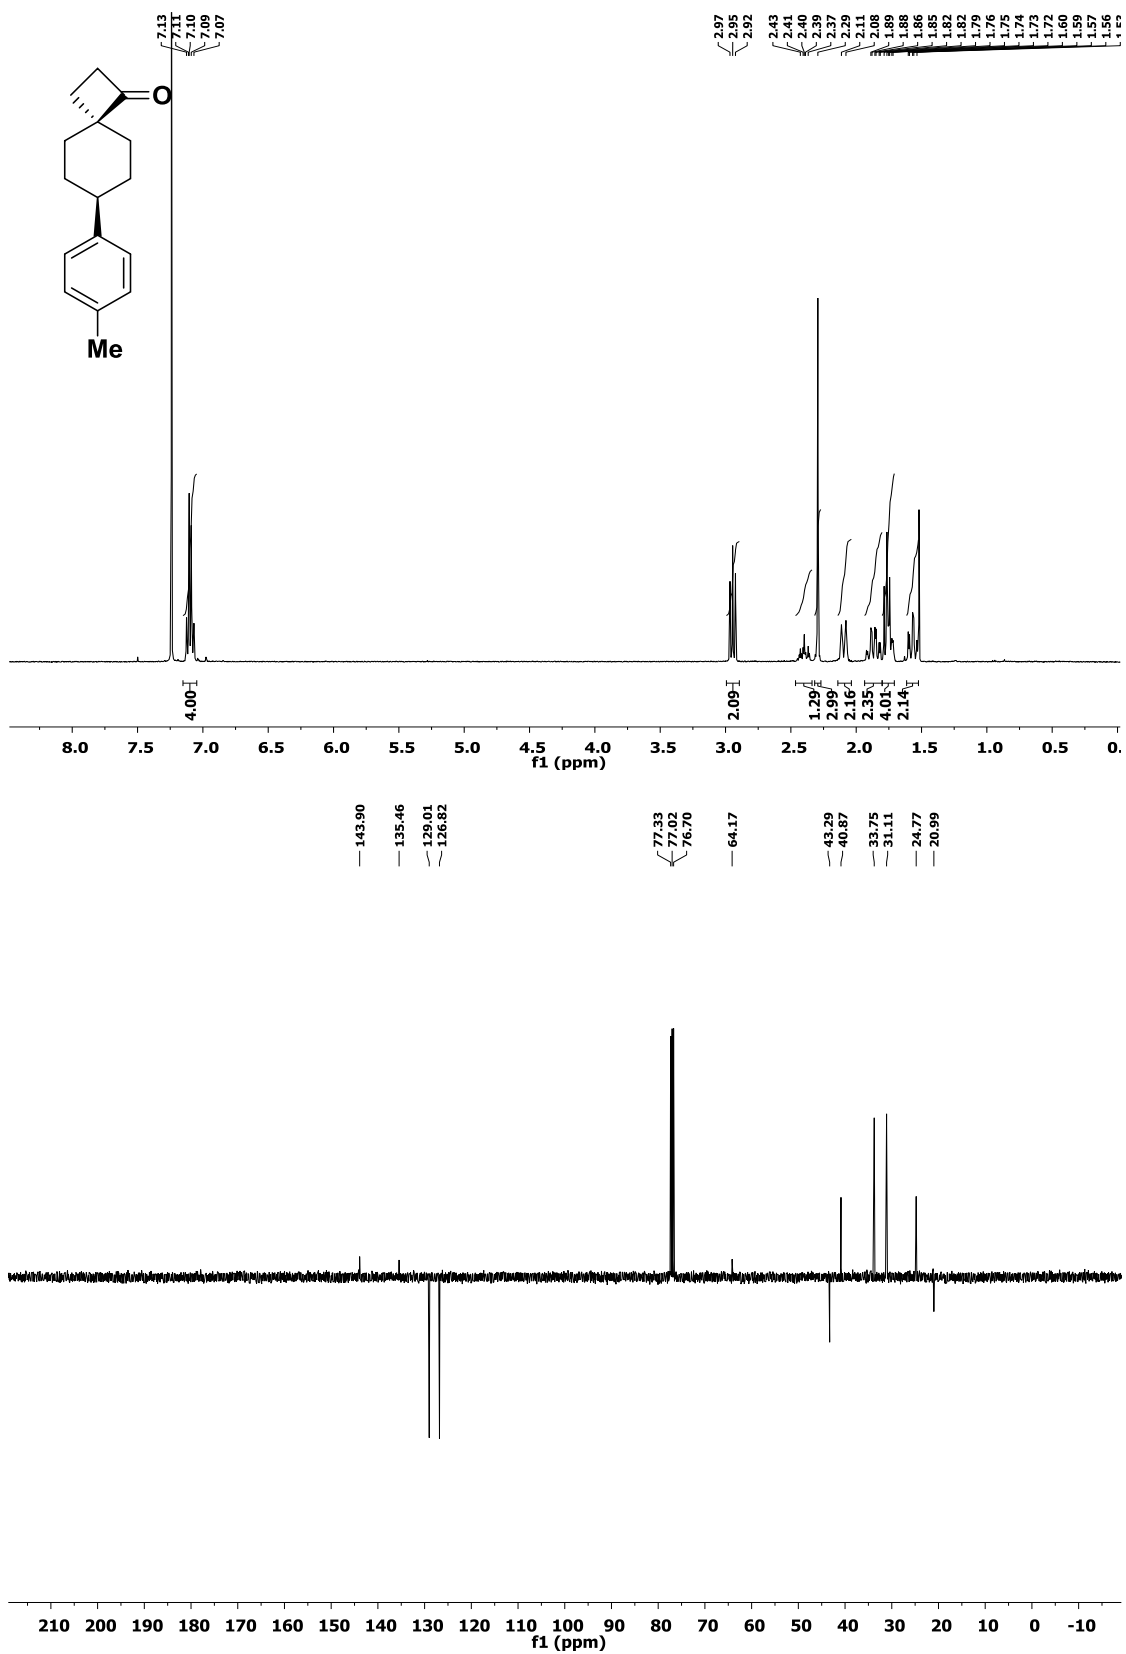

Ketone 6f

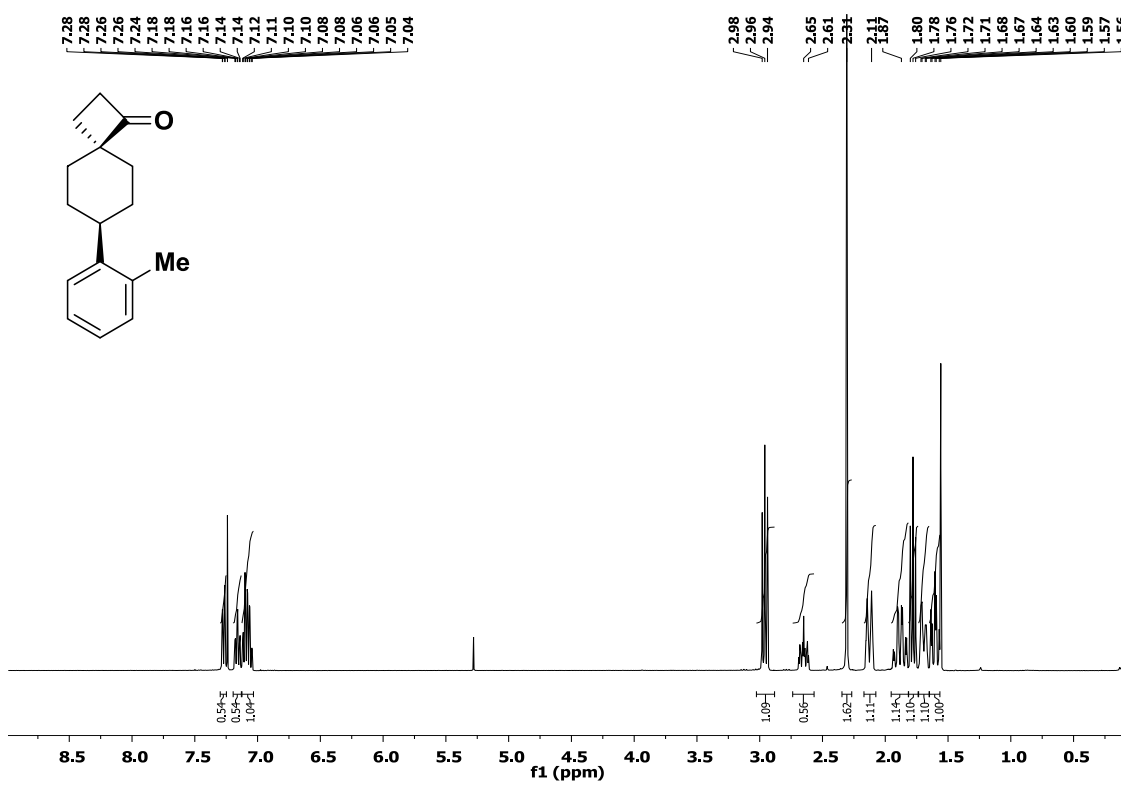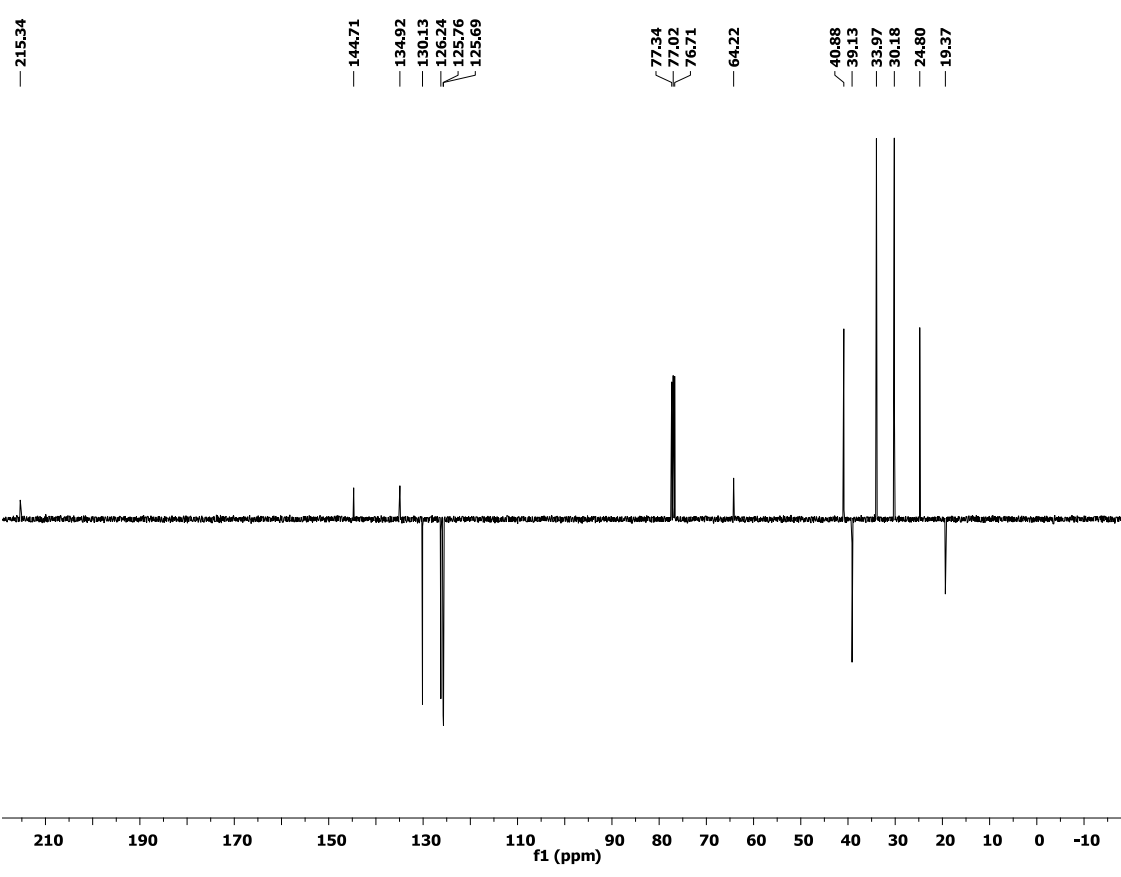

Ketone 6g

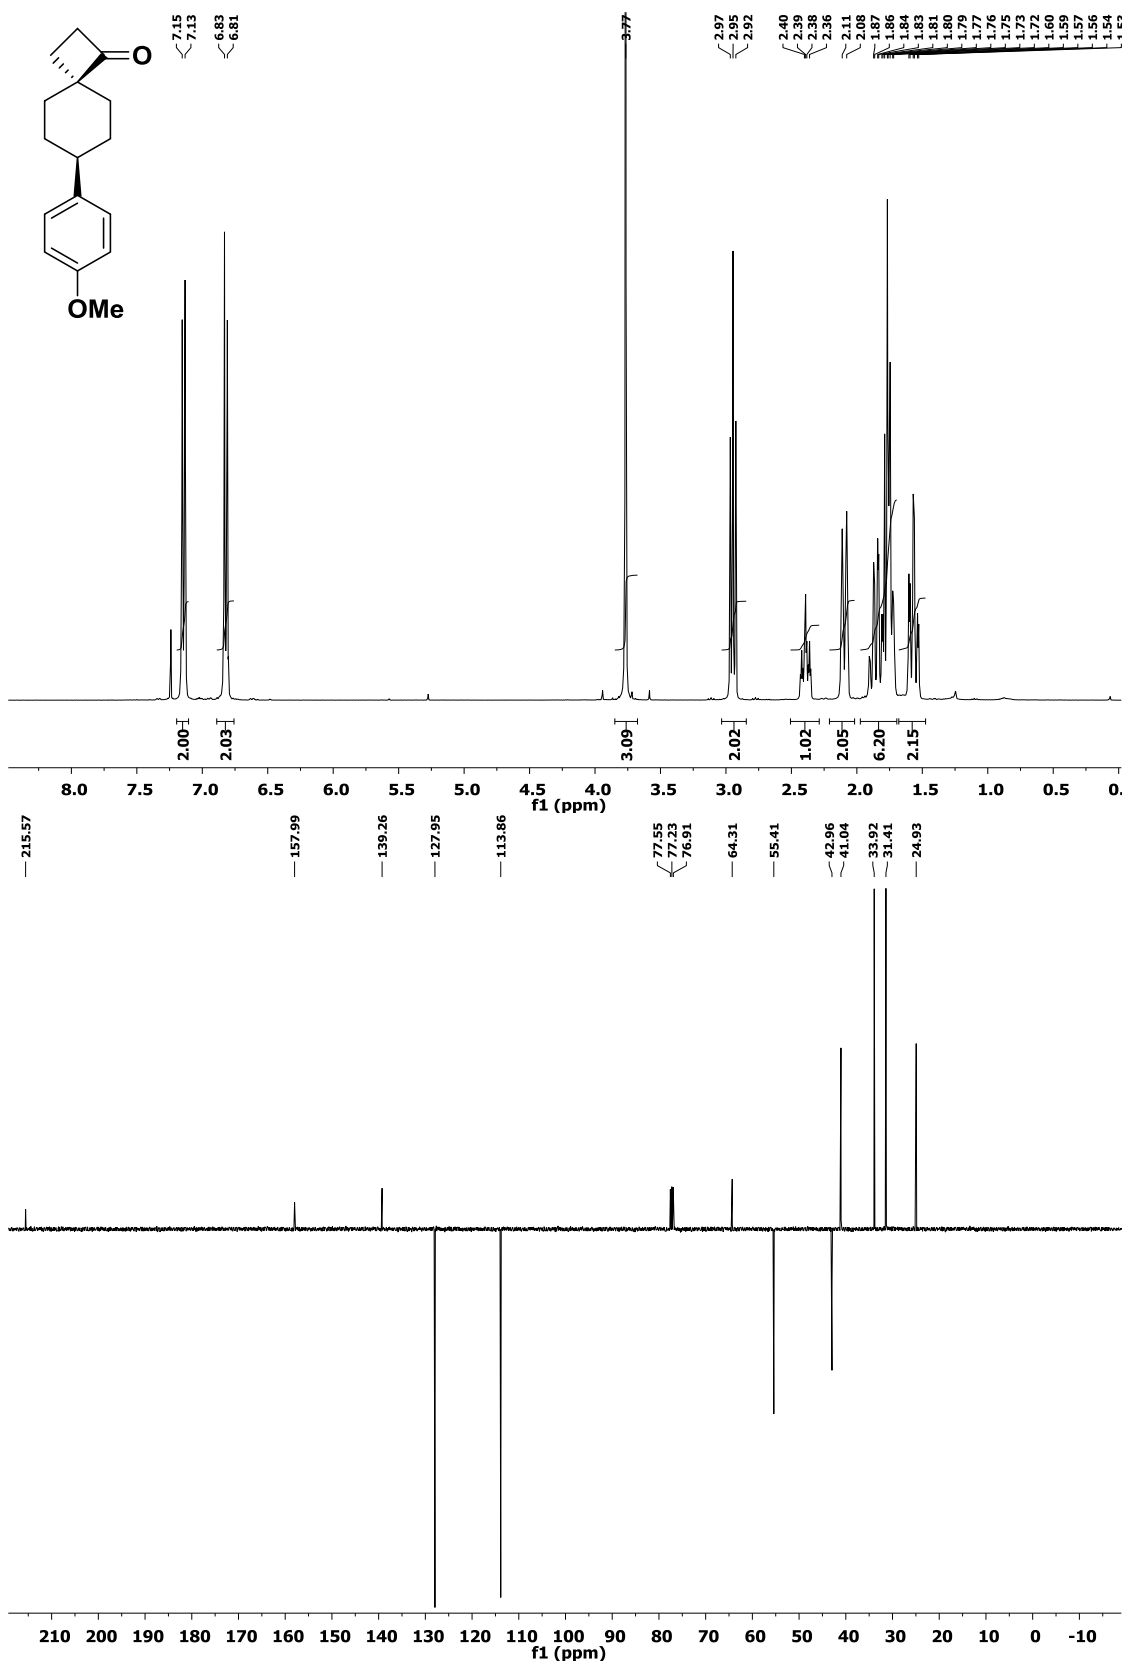



Ketone 6h

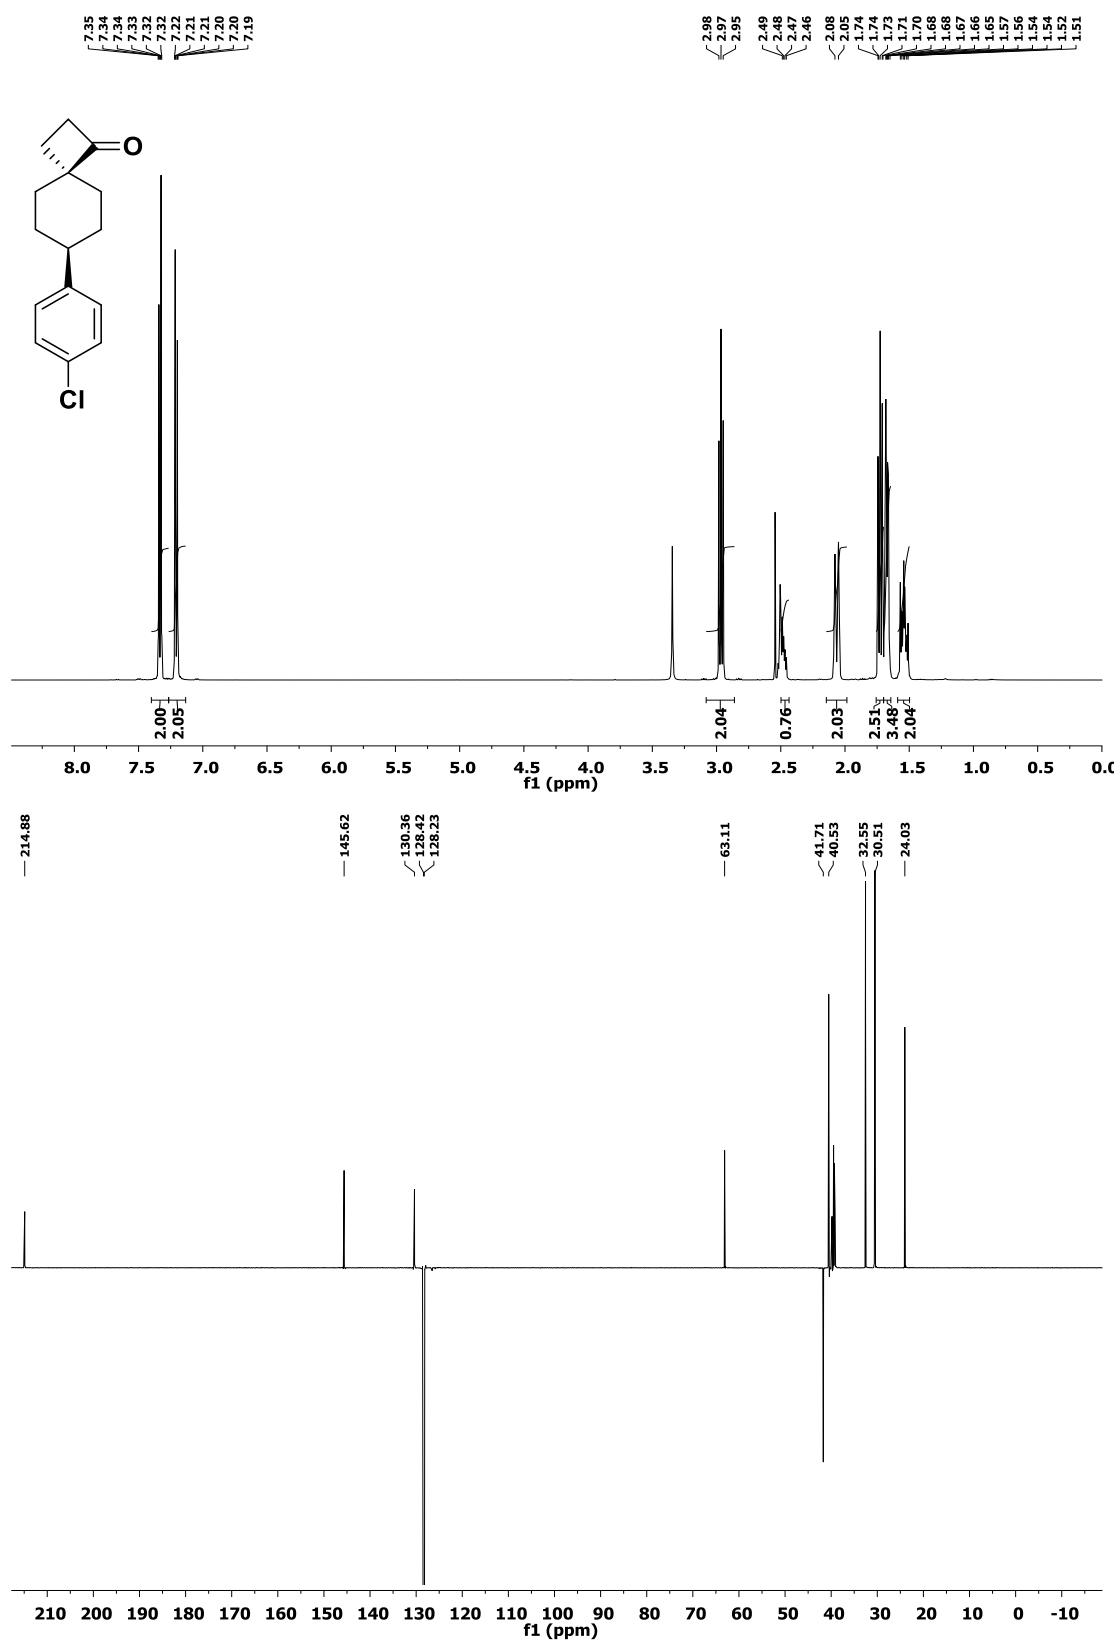

Lactam **8aa**

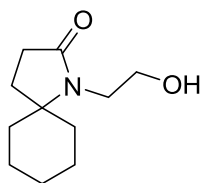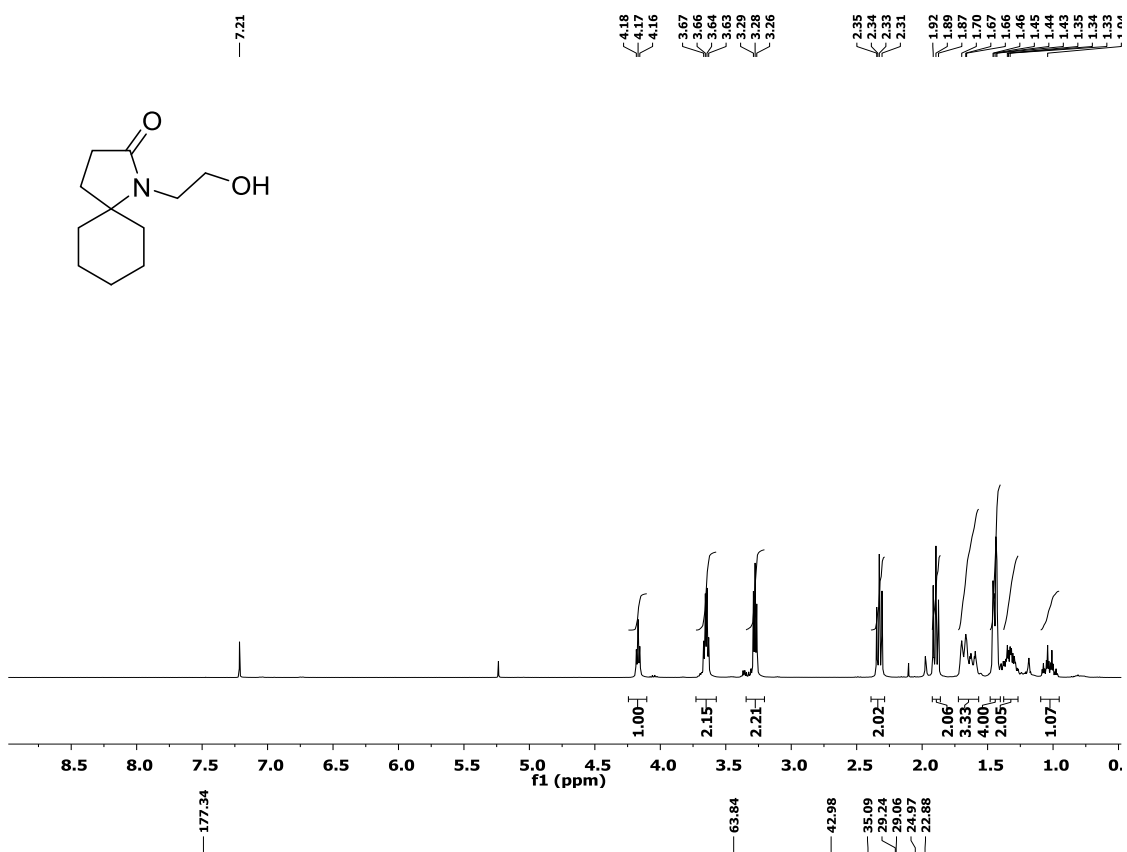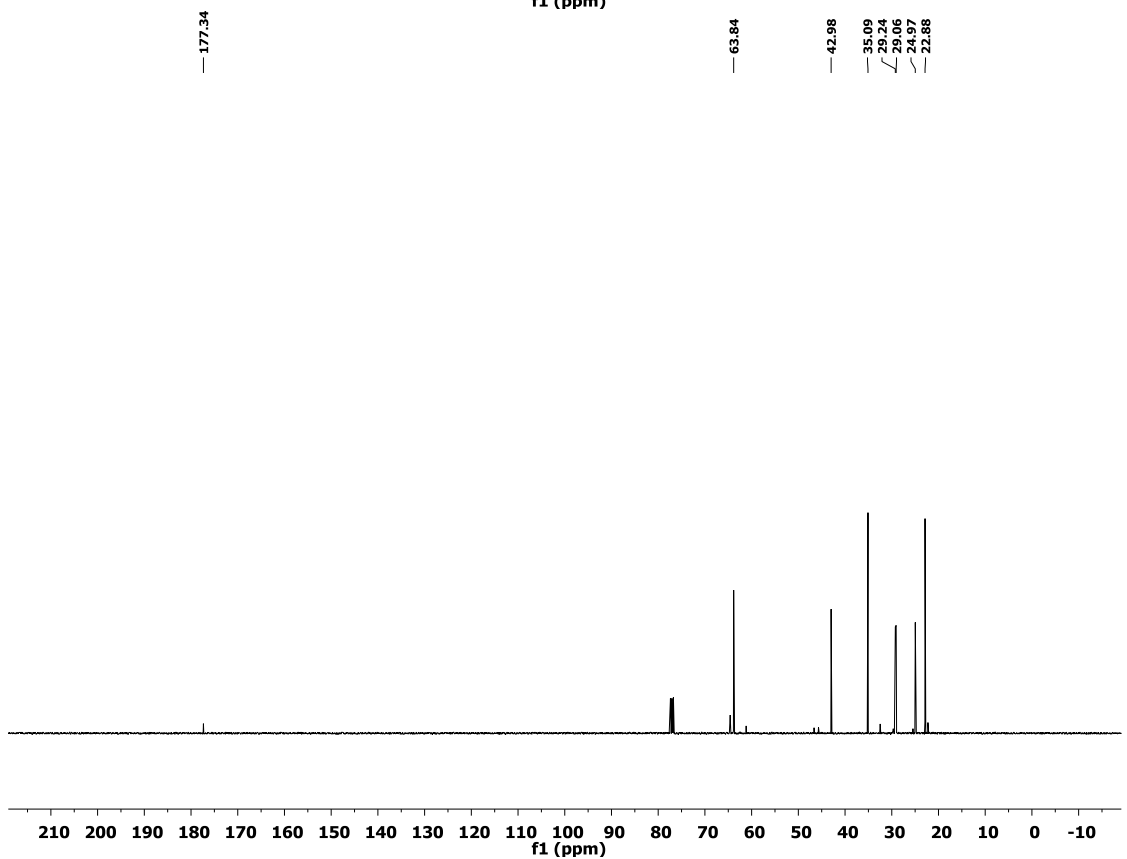

Lactam **8ca**

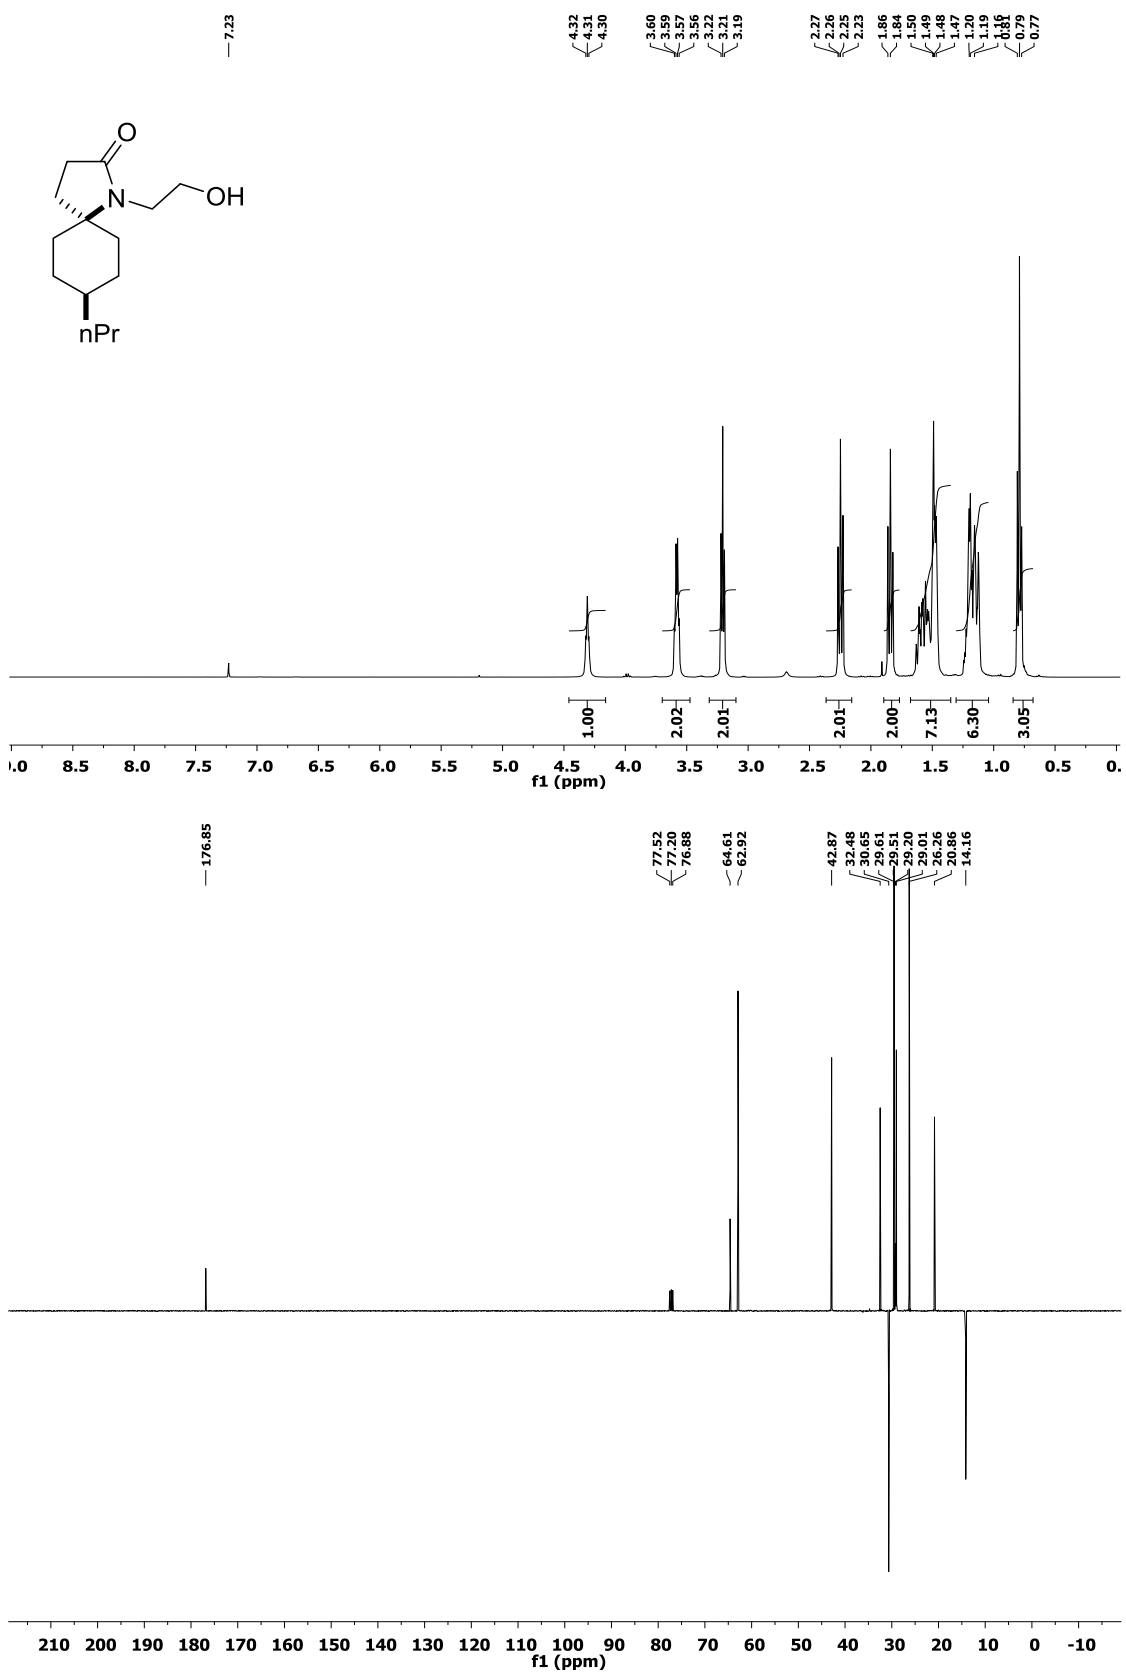

Lactam **8da**

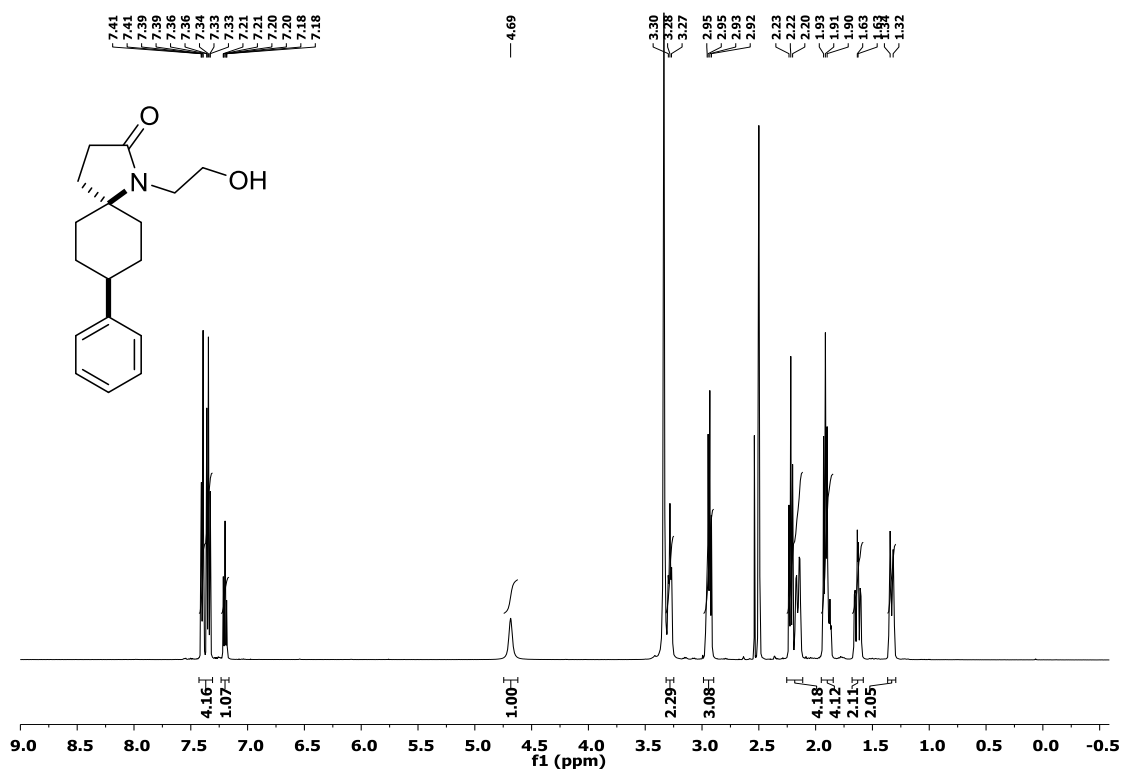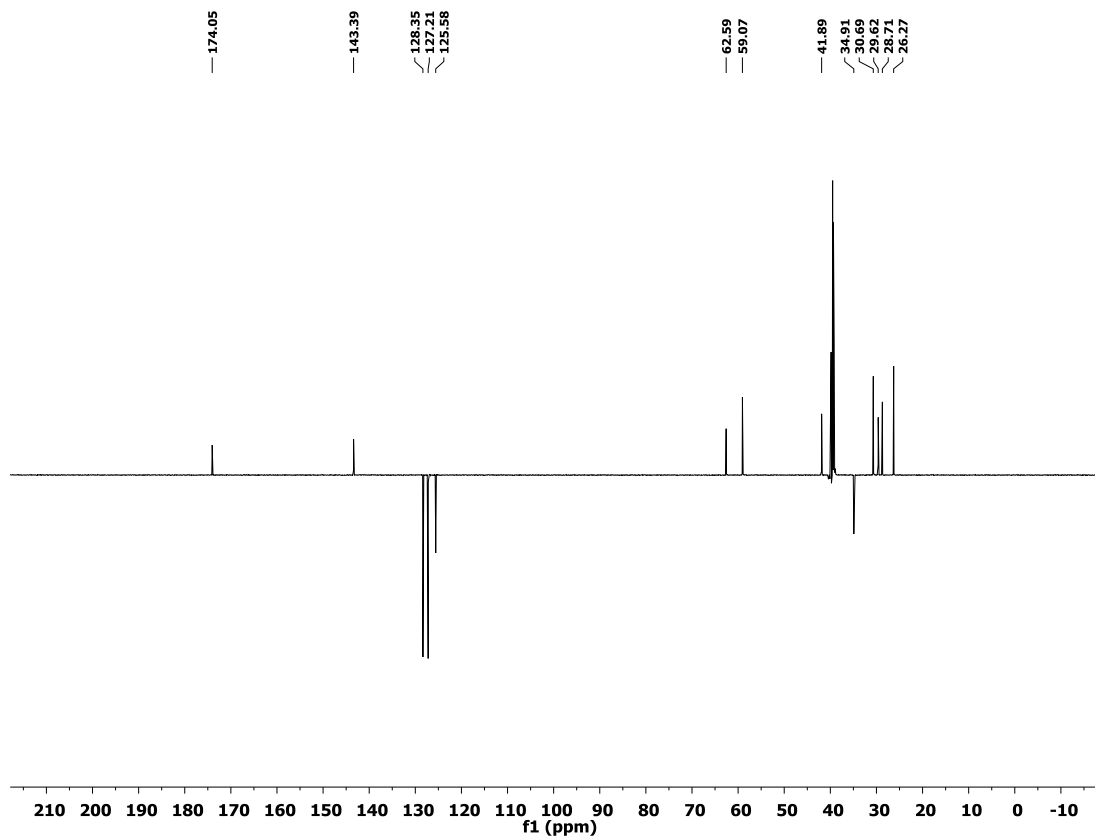

Lactam **8ea**

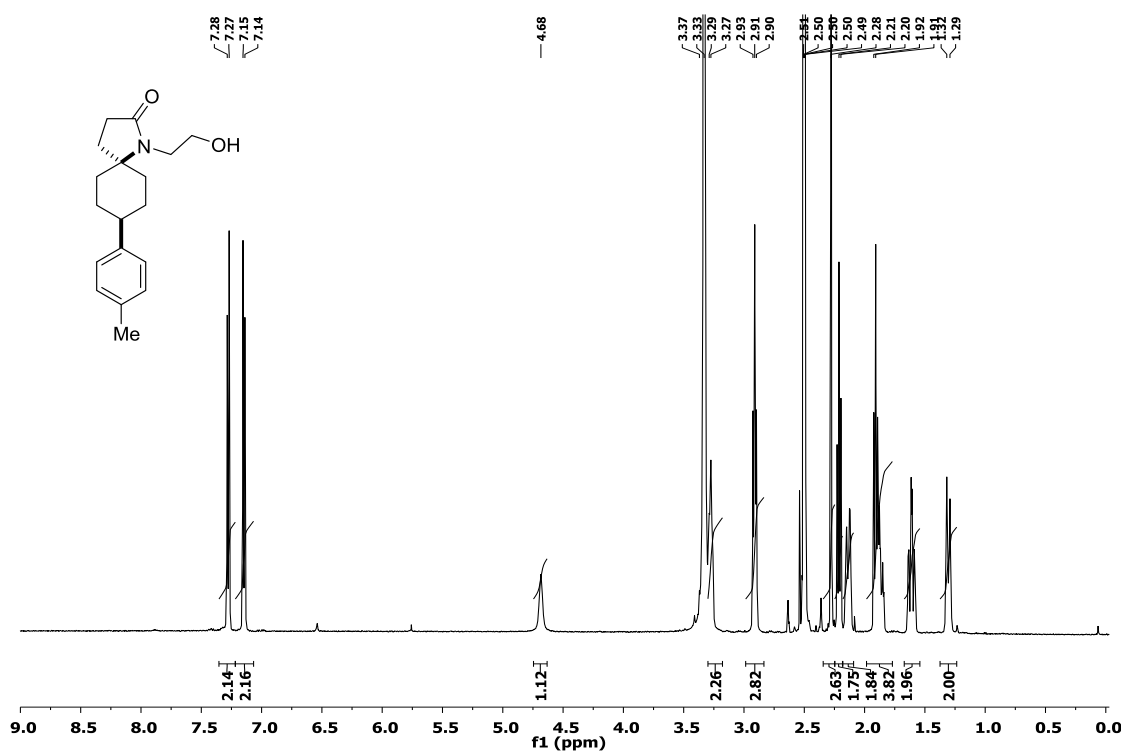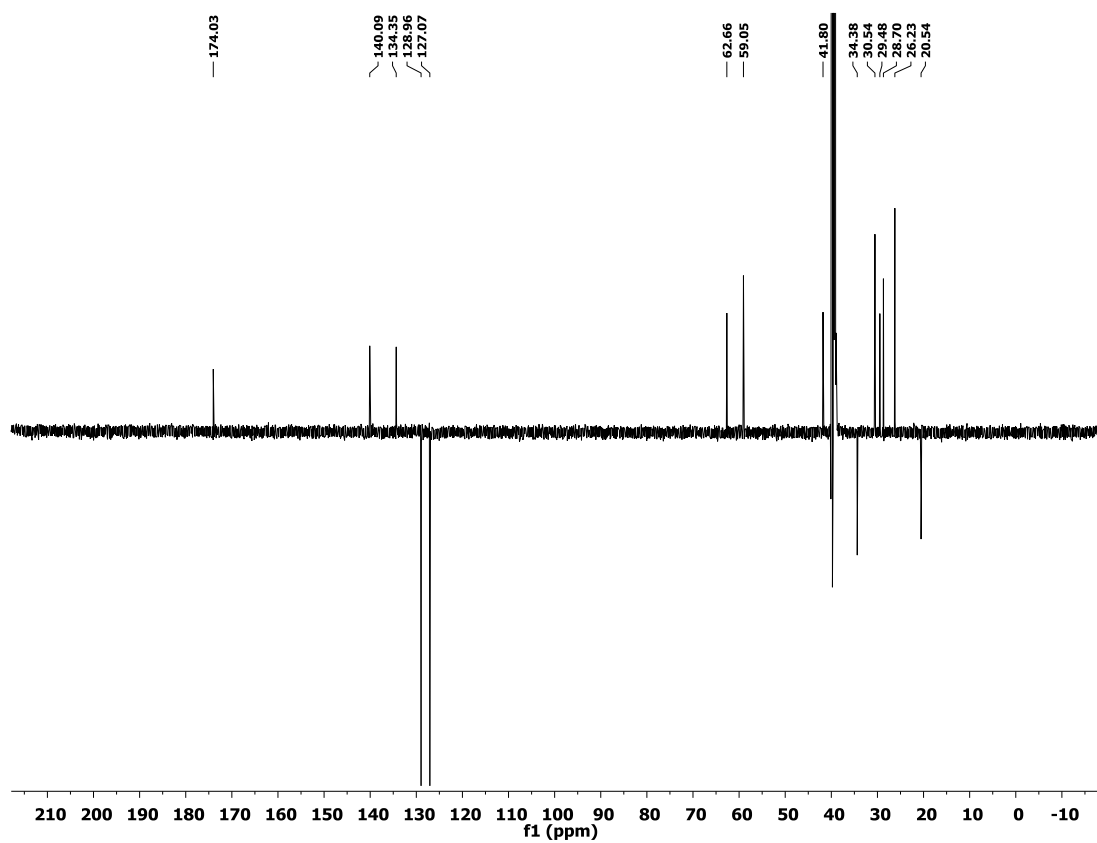

Lactam **8ga**

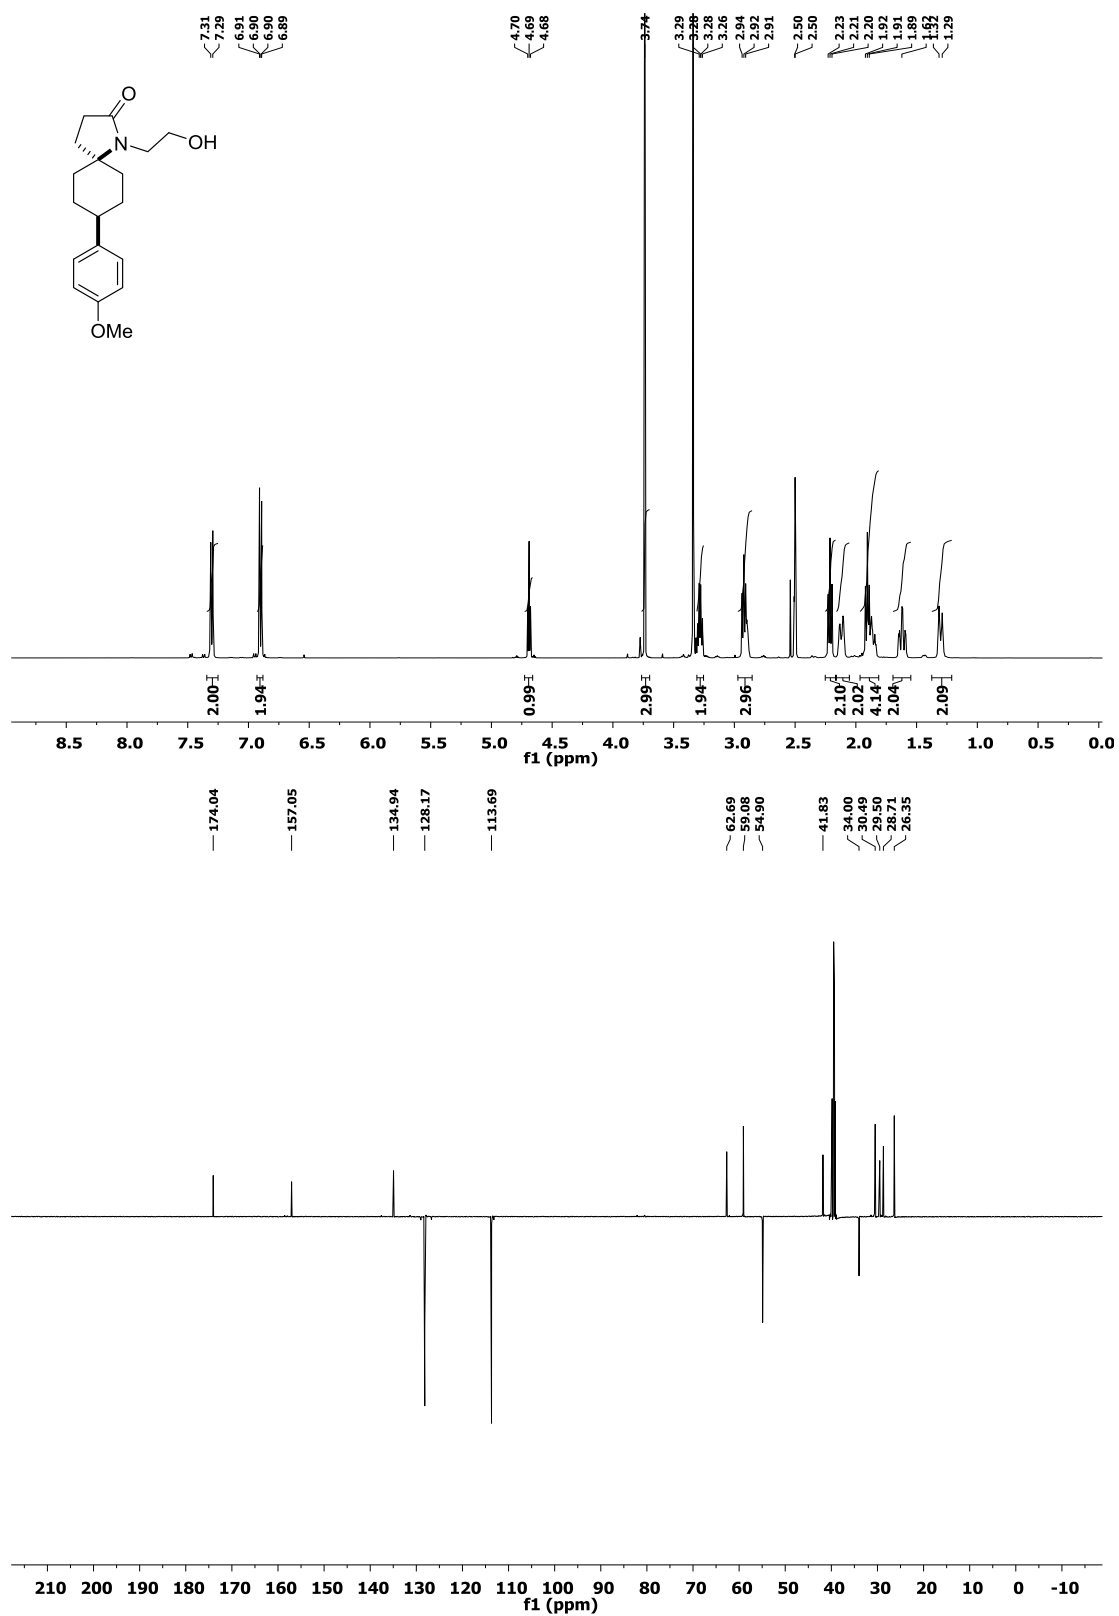

Lactam **8ha**

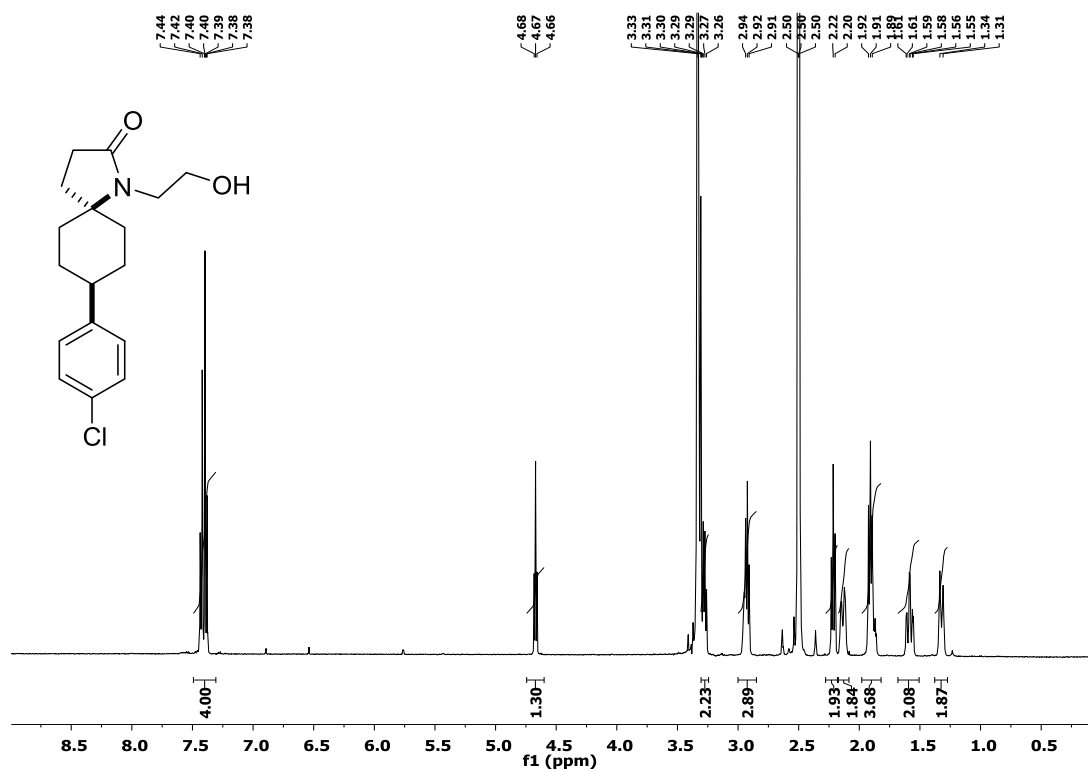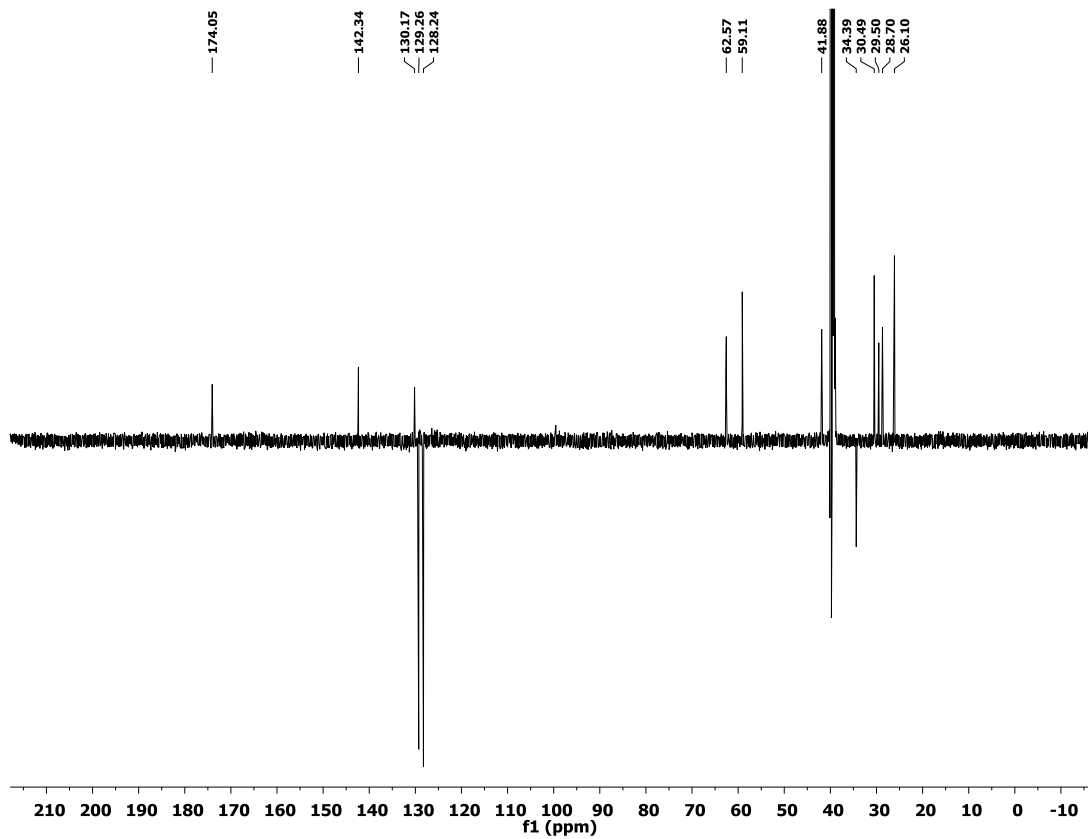

Lactam **8ab**

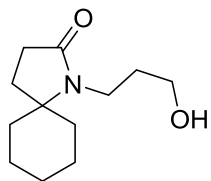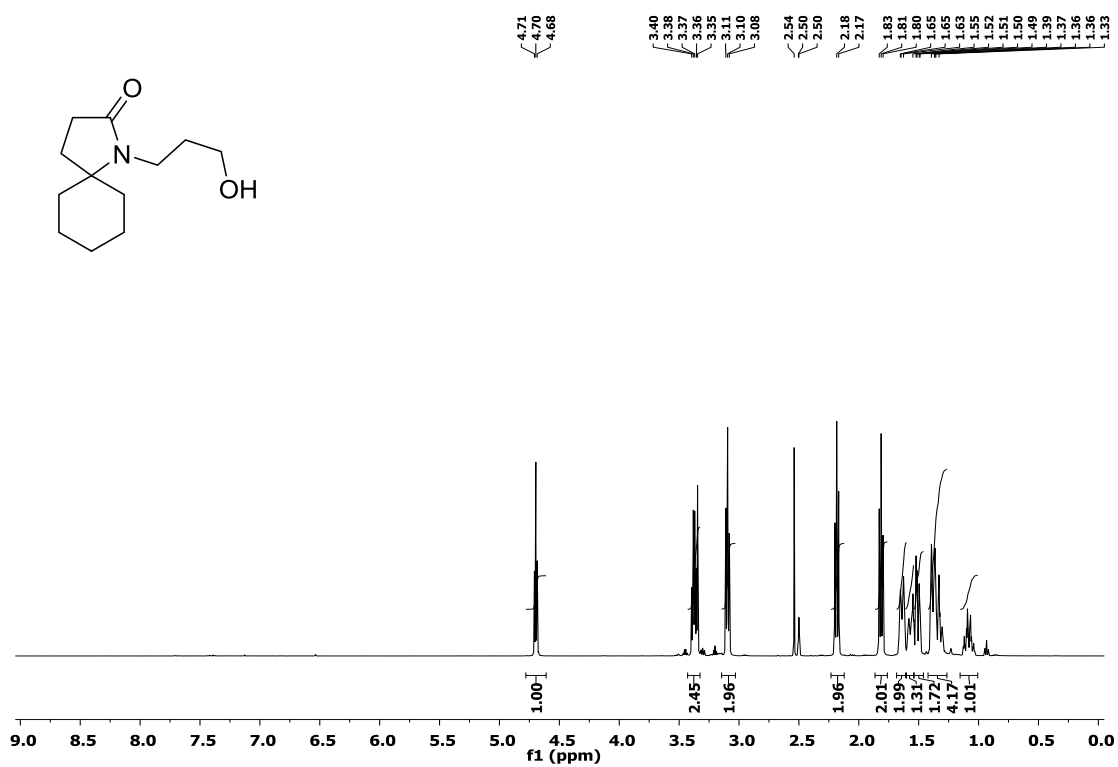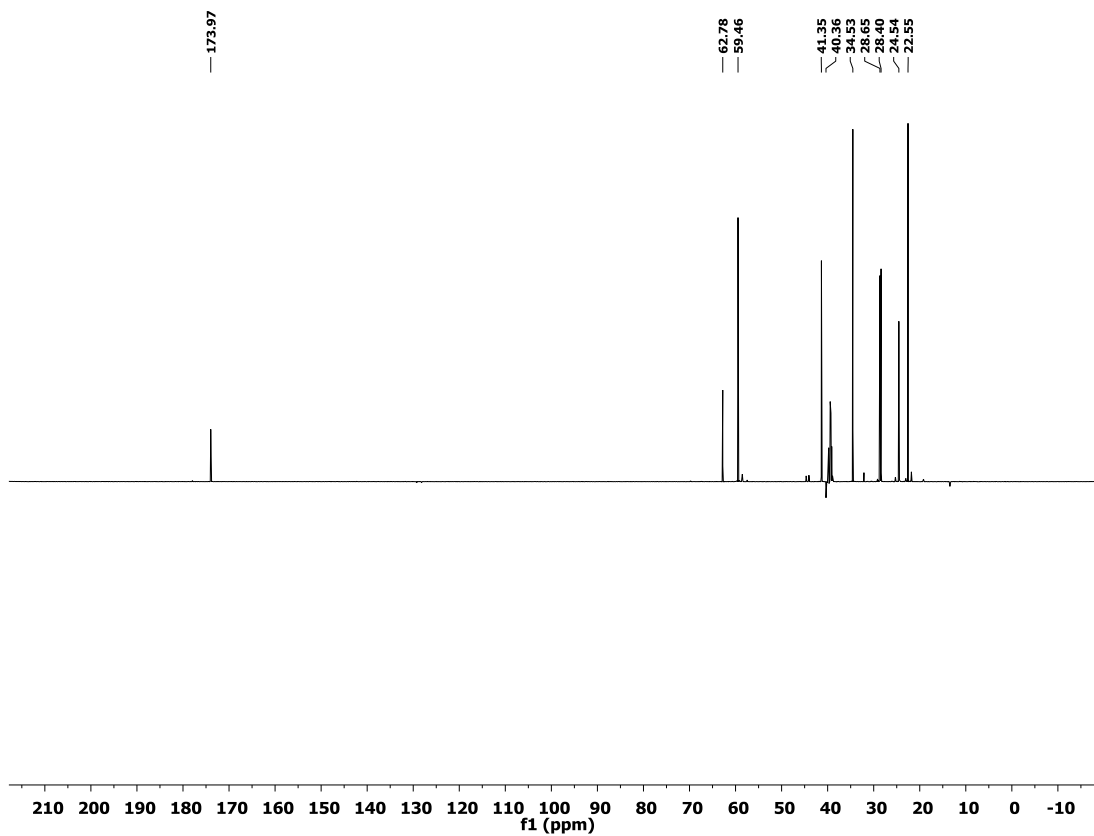



Lactam **8bb**

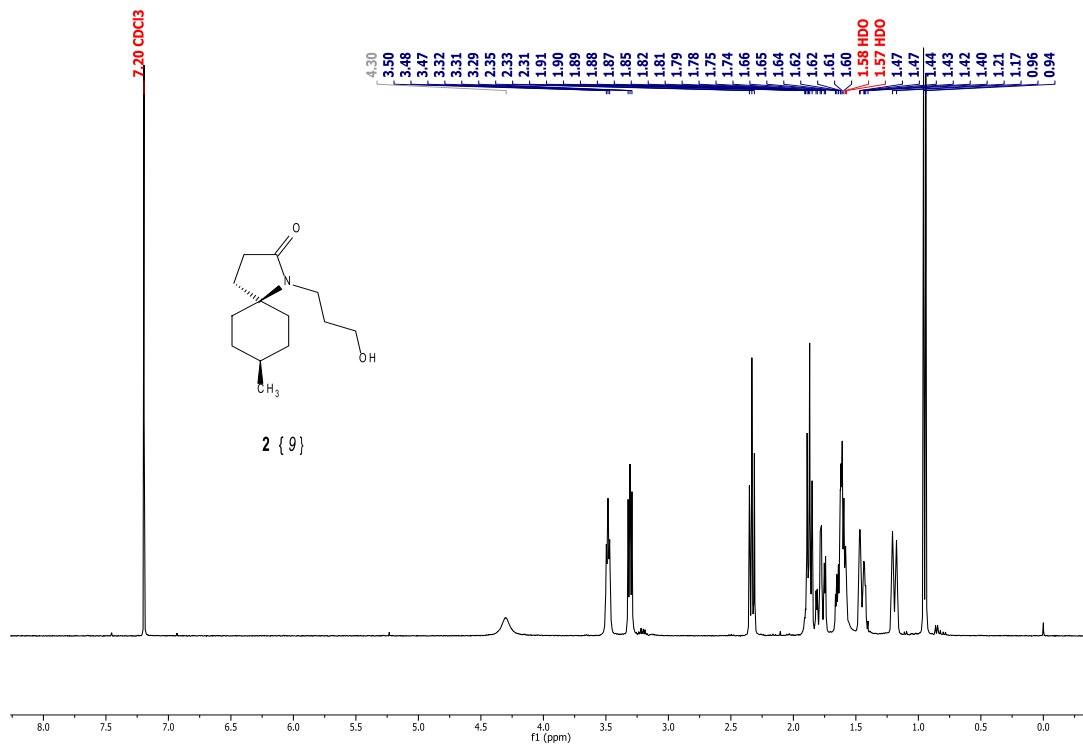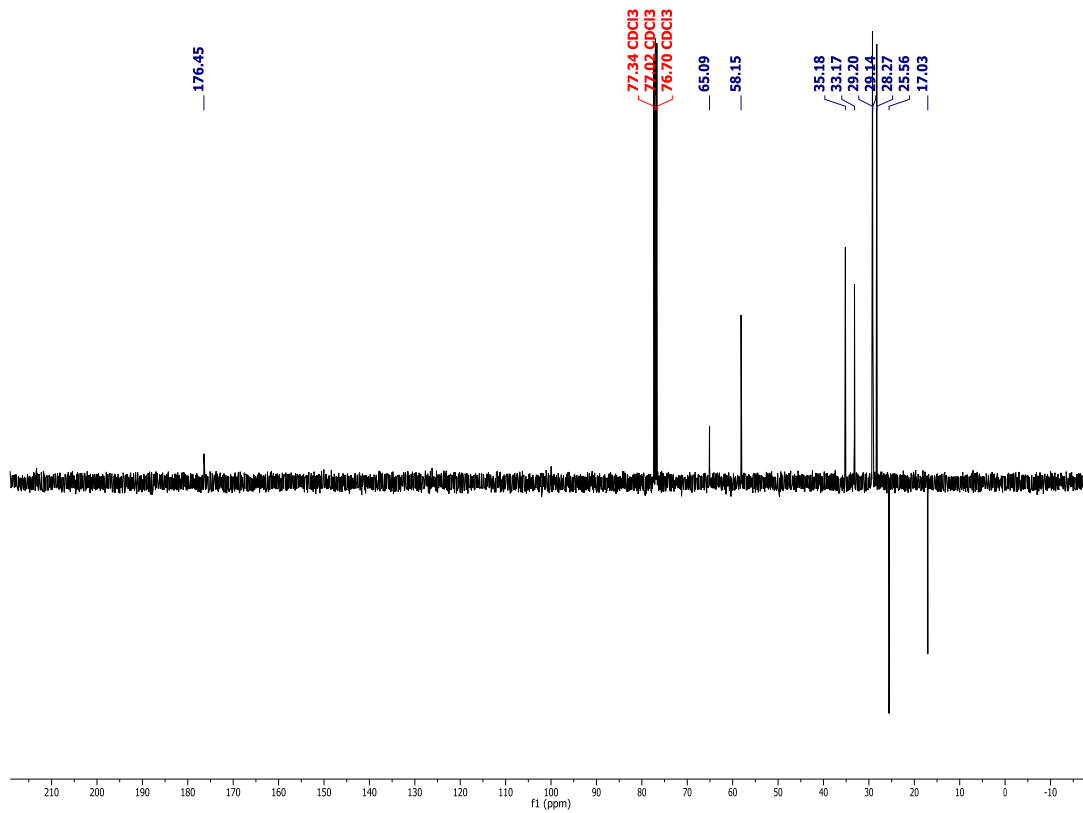

Lactam **8db**

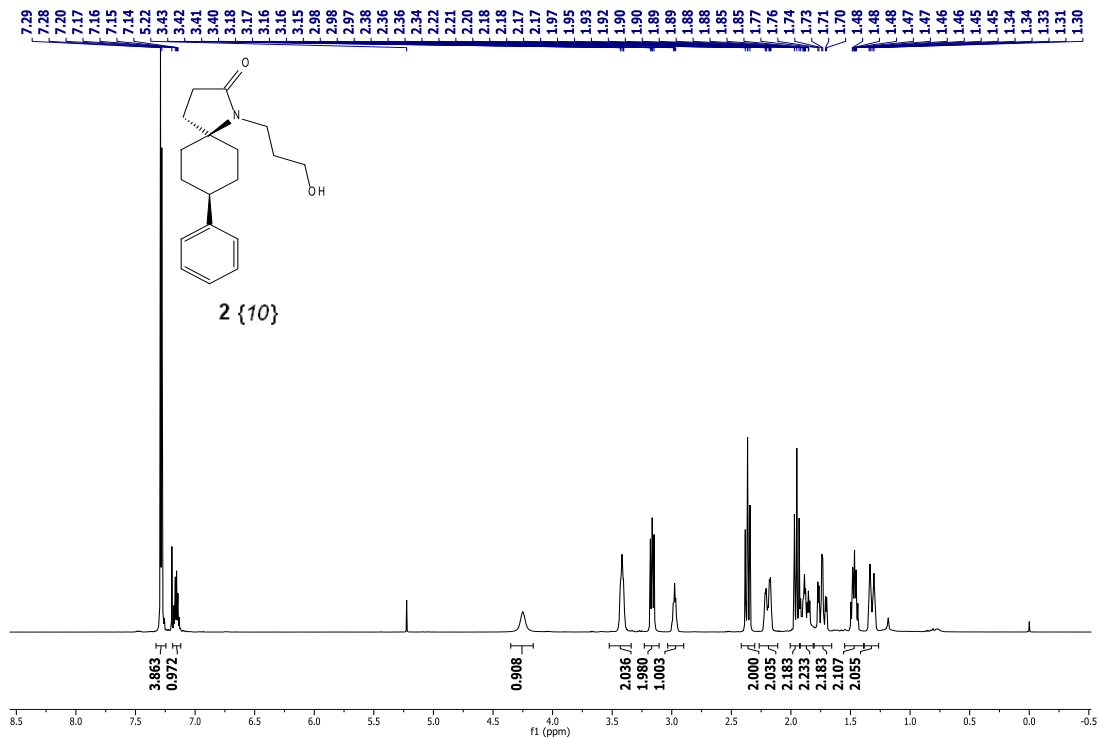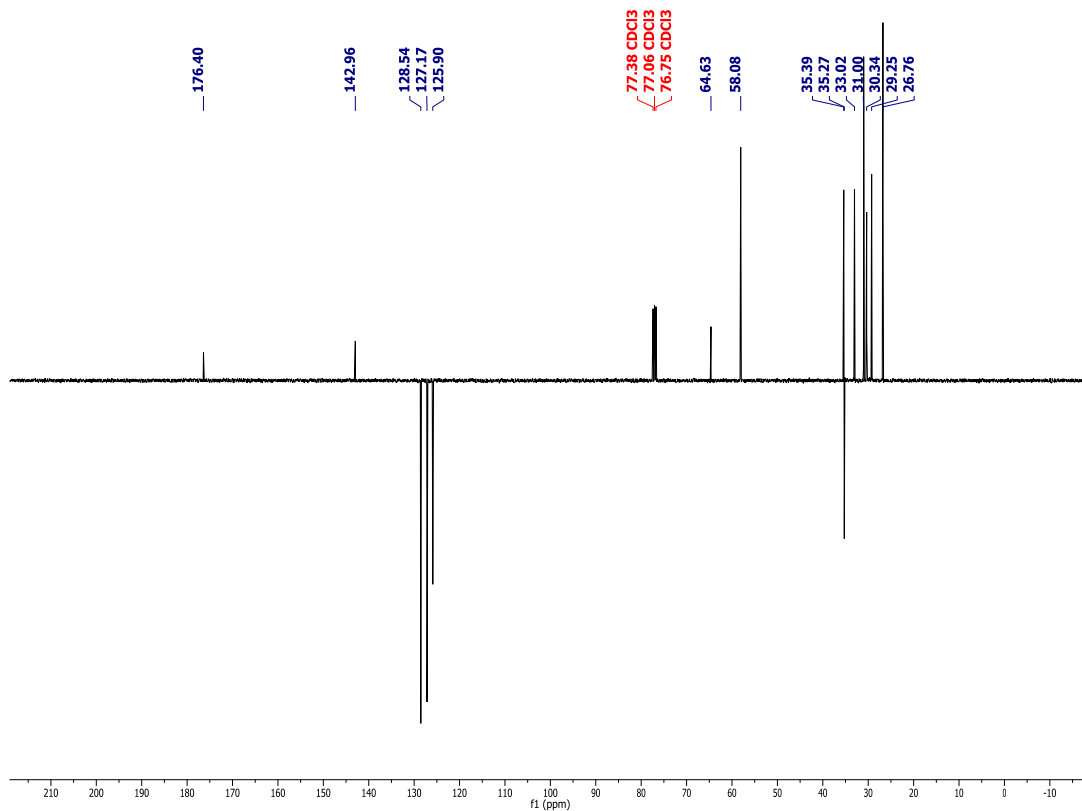

Lactam 9bb

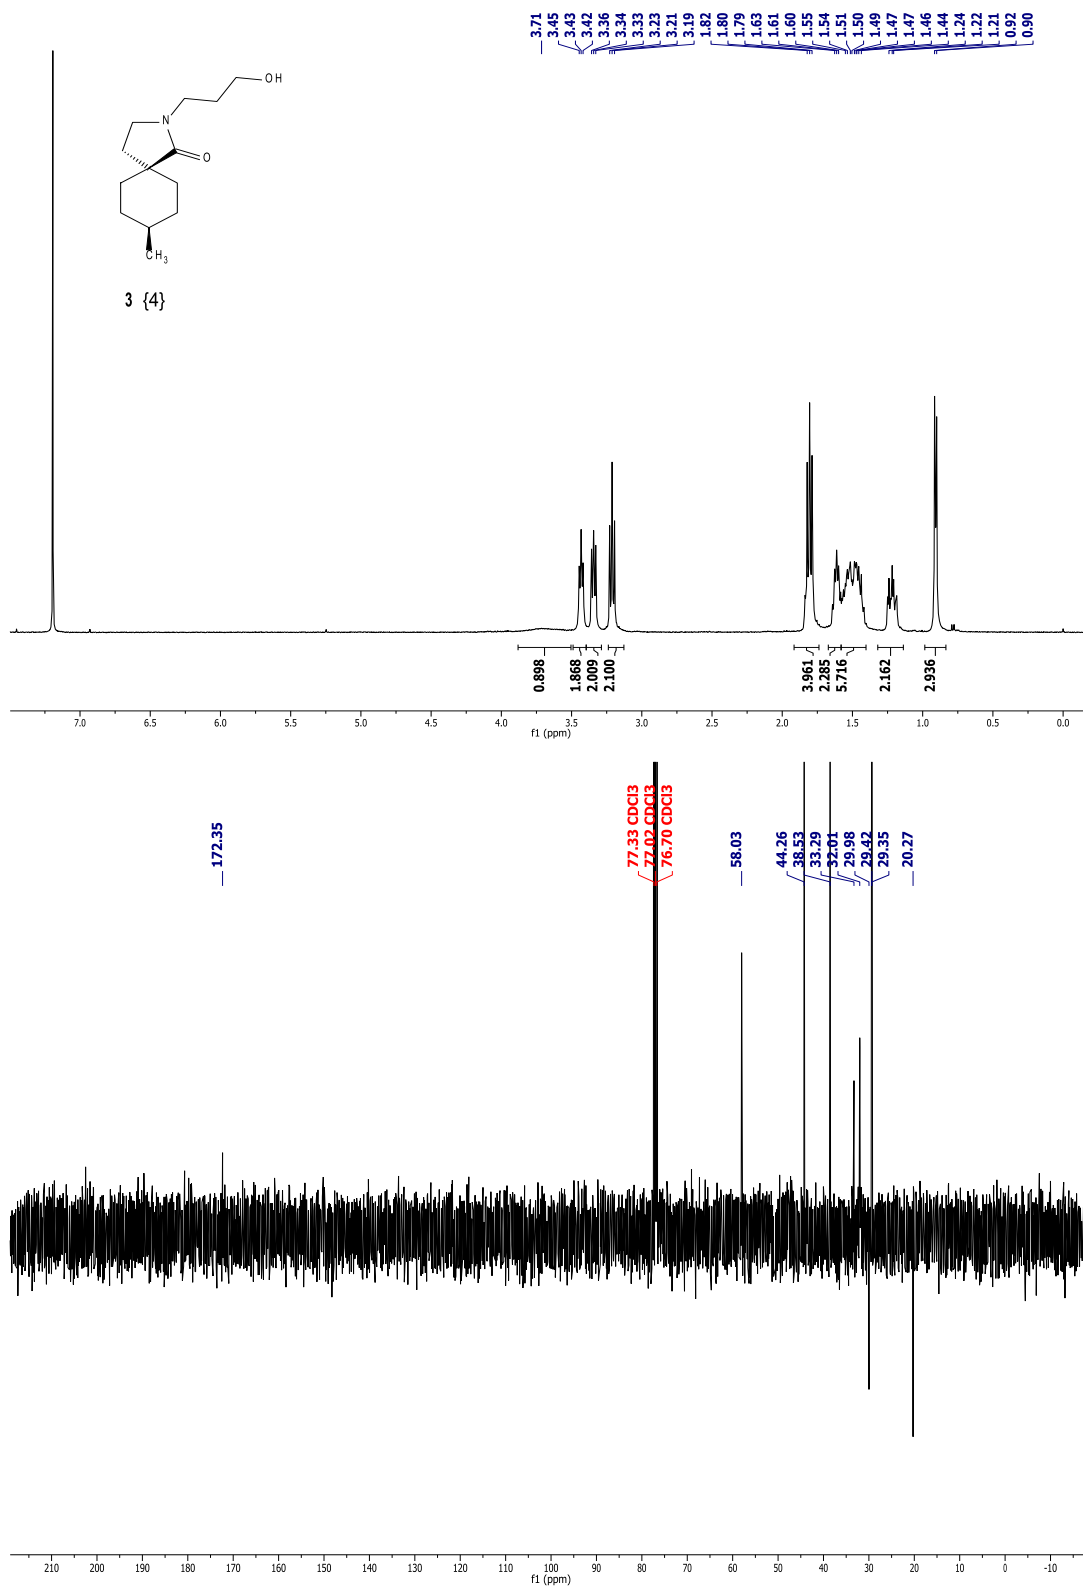

Lactam **9db**

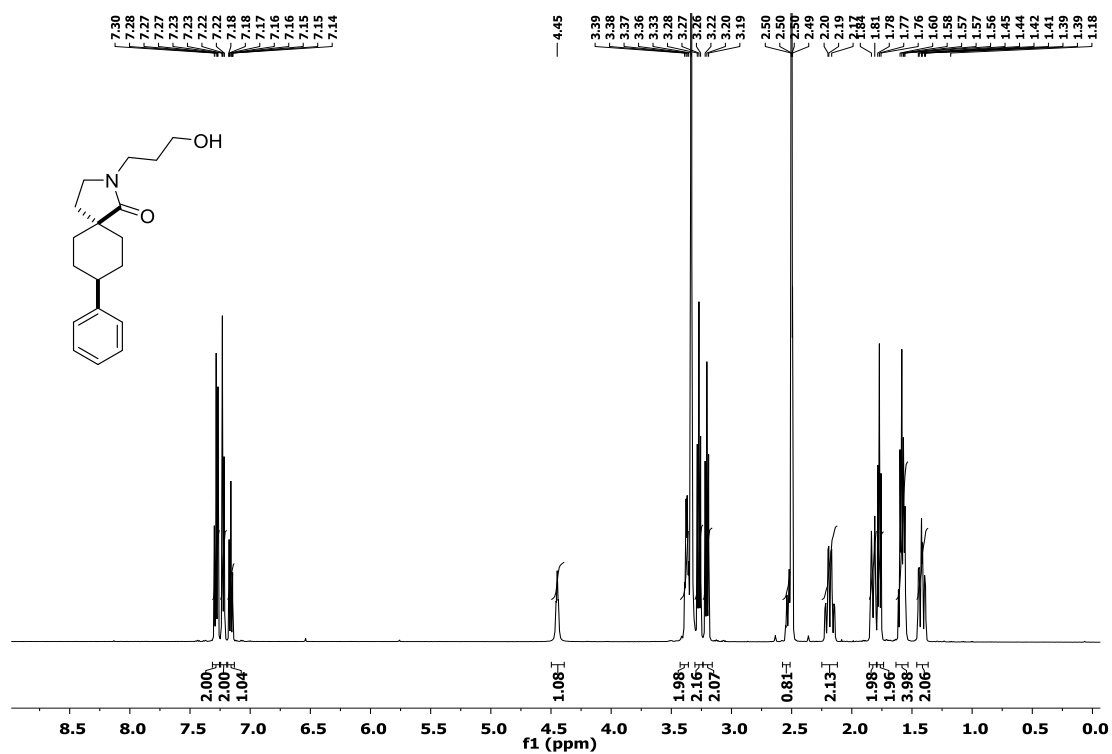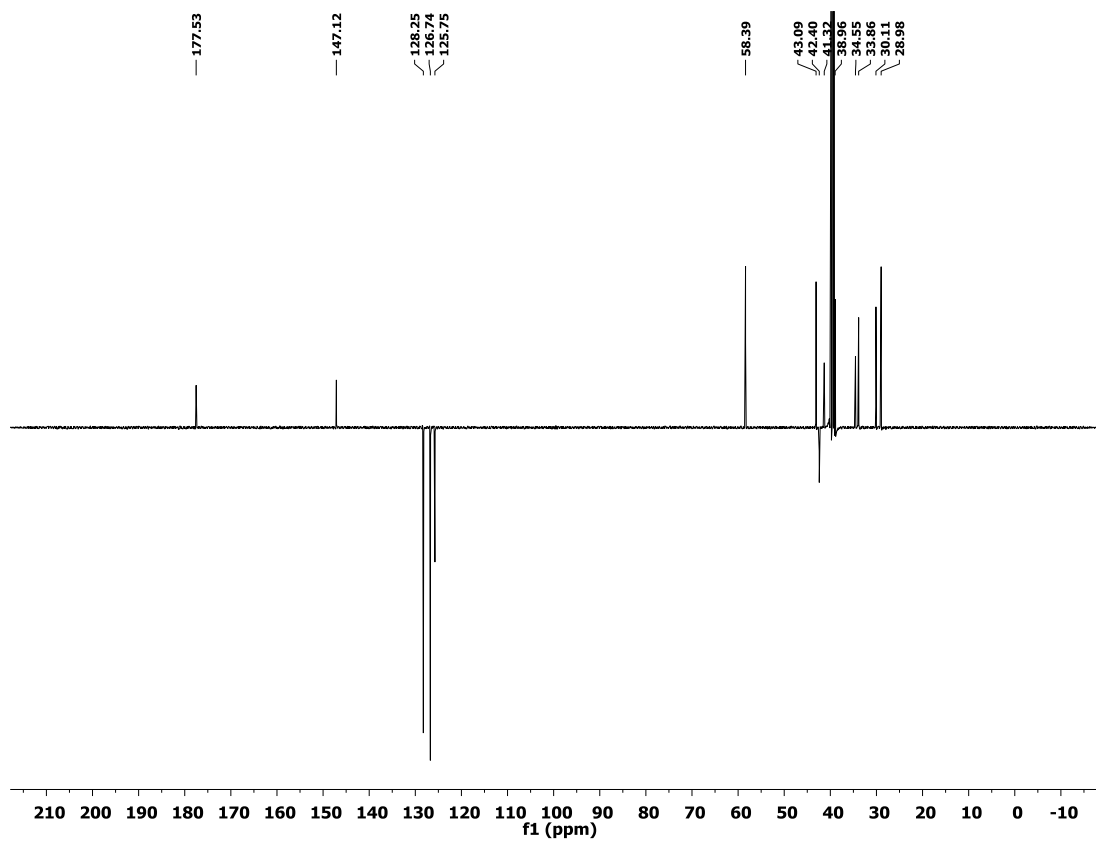

# Amine 10ca

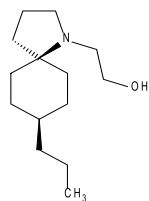

4 f 4 1

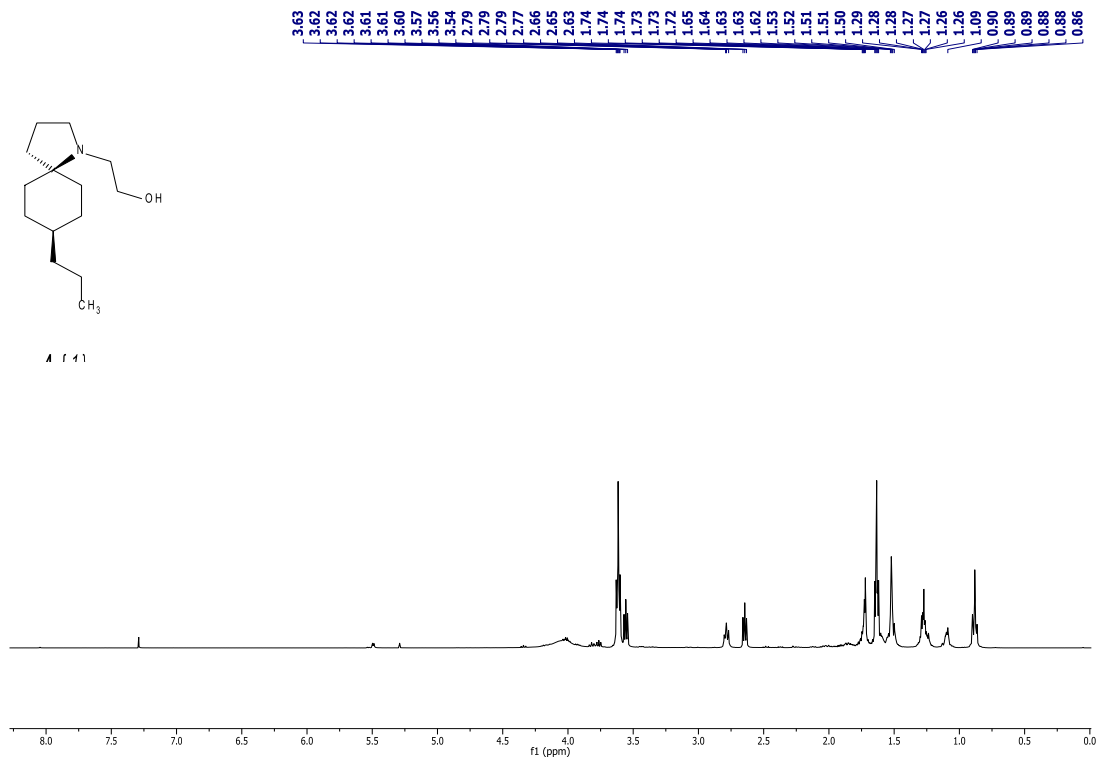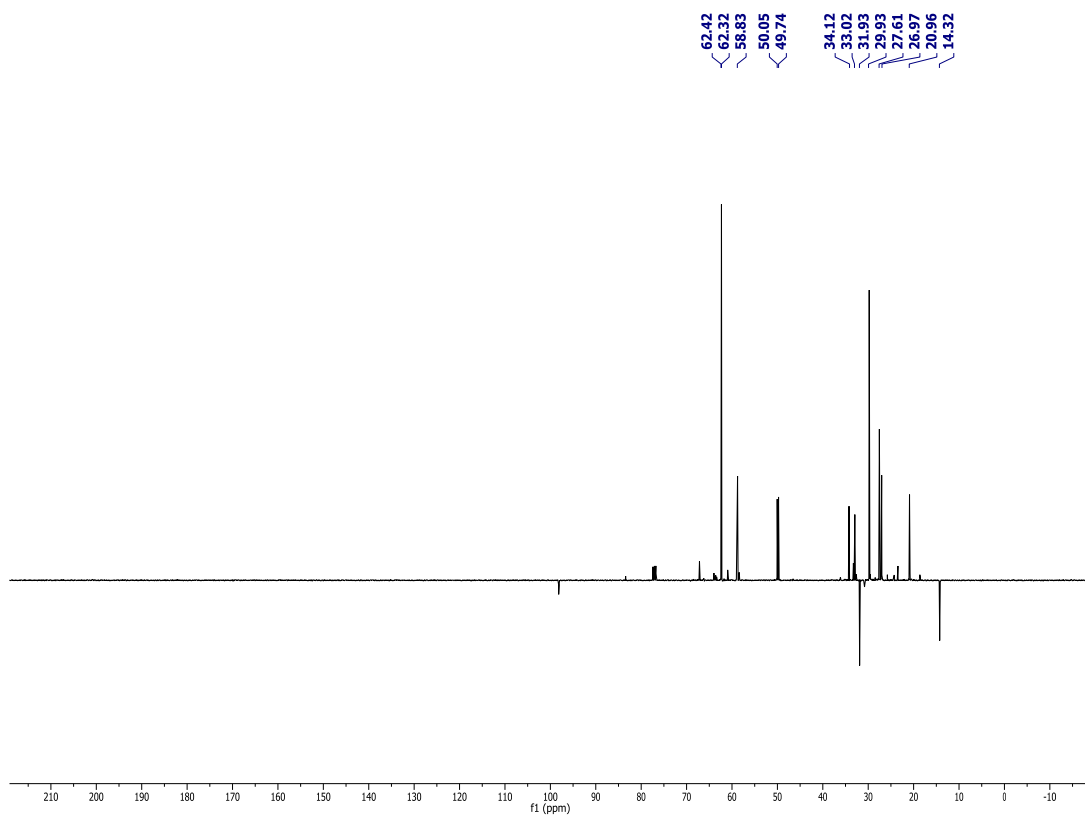

Amine 10da

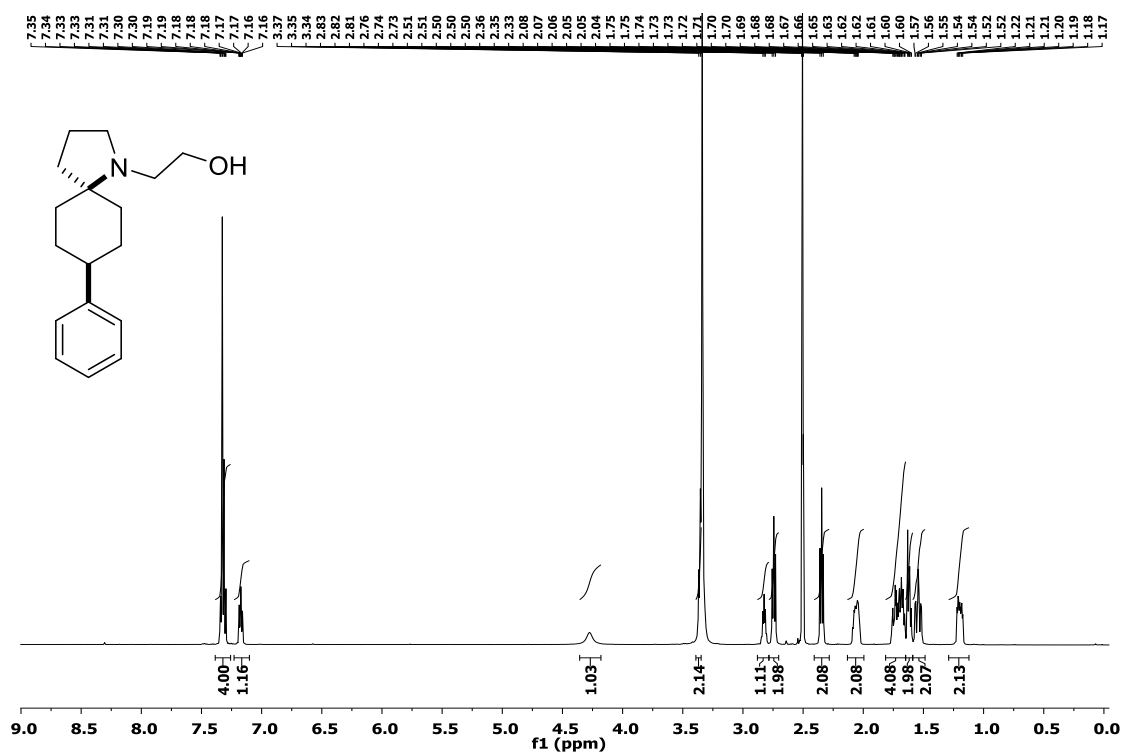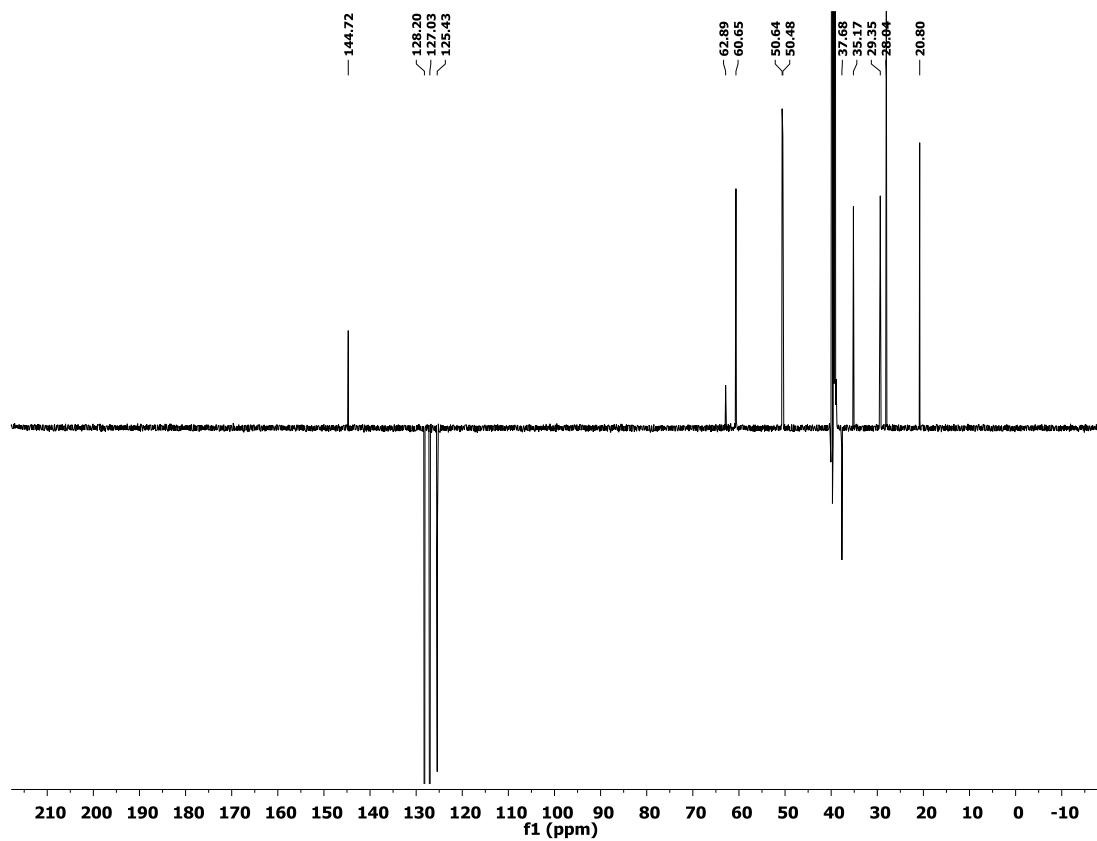

Amine 10db

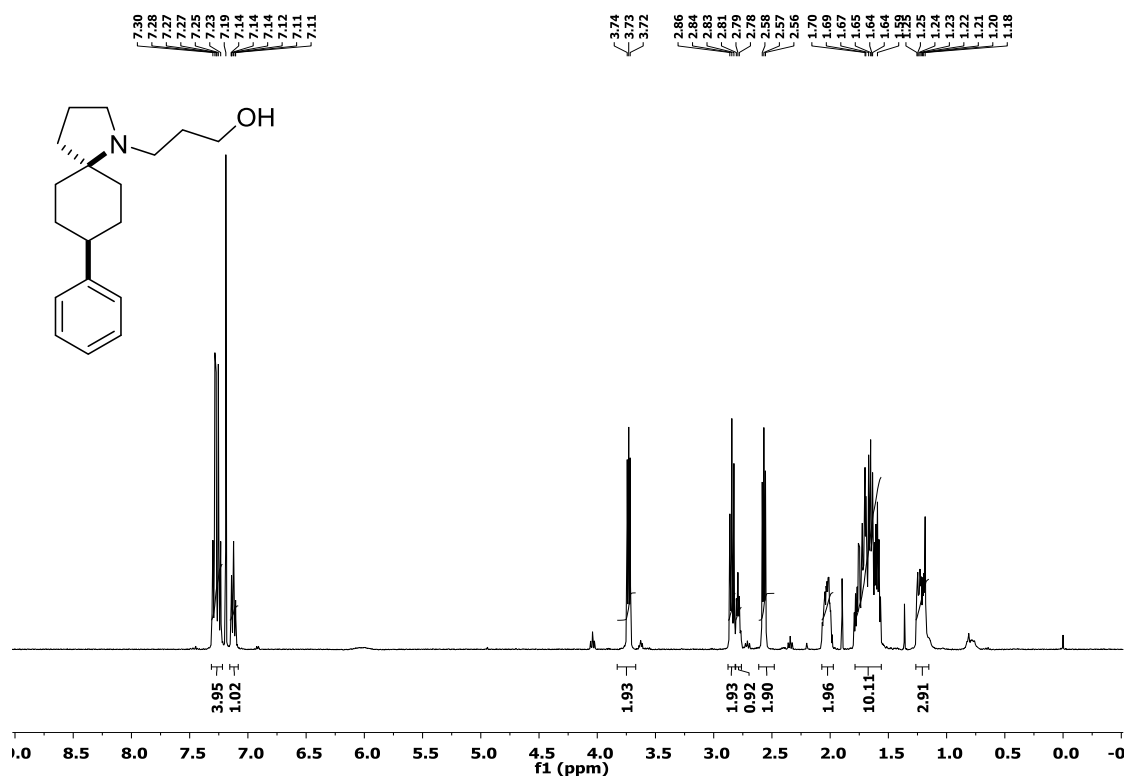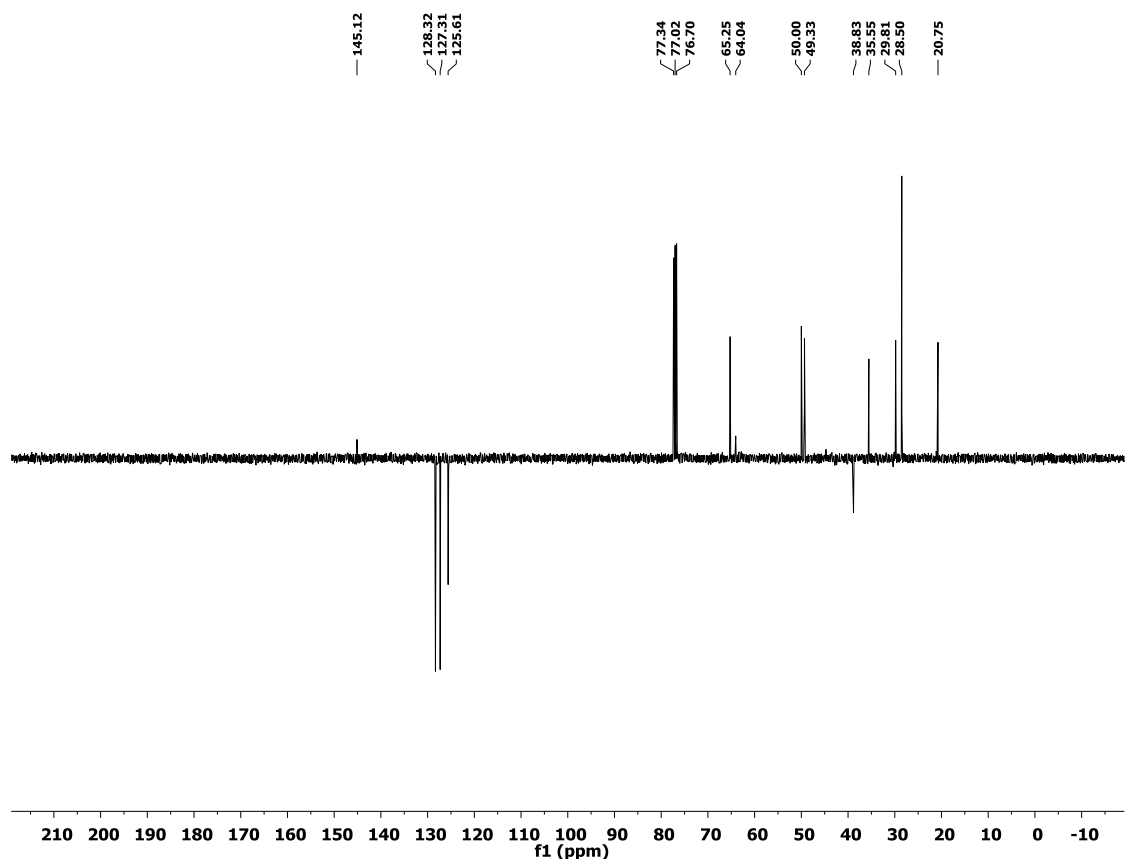

Lactam **8bc**

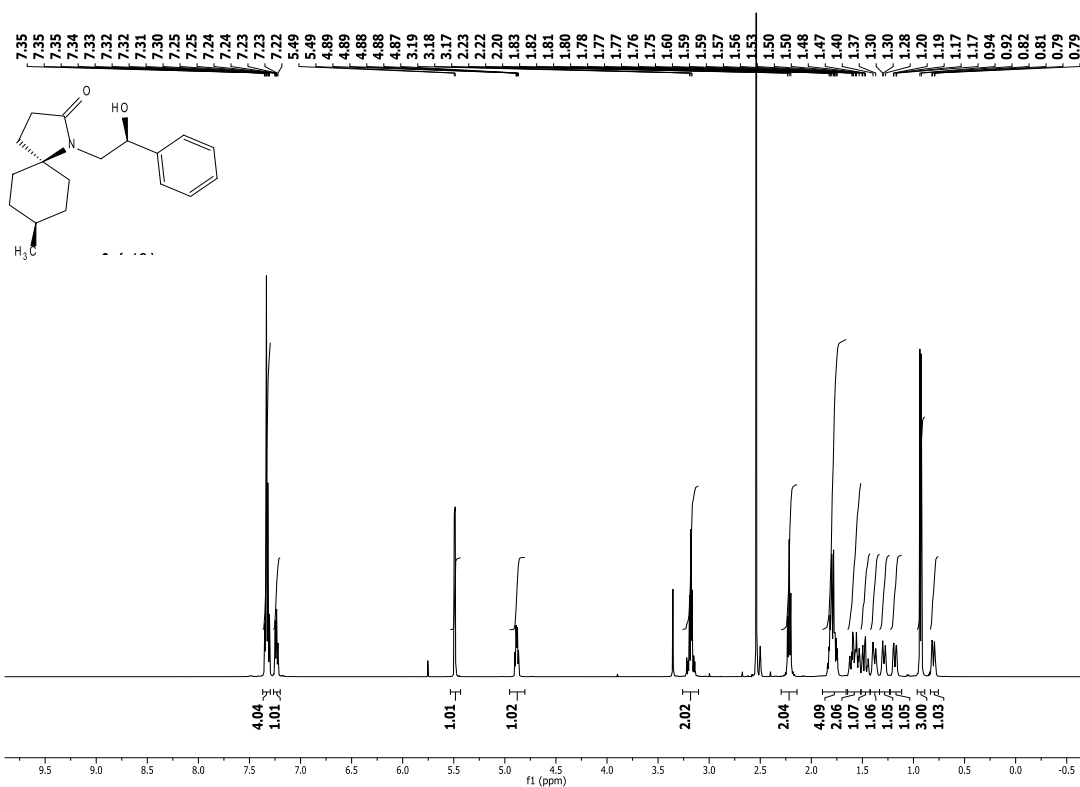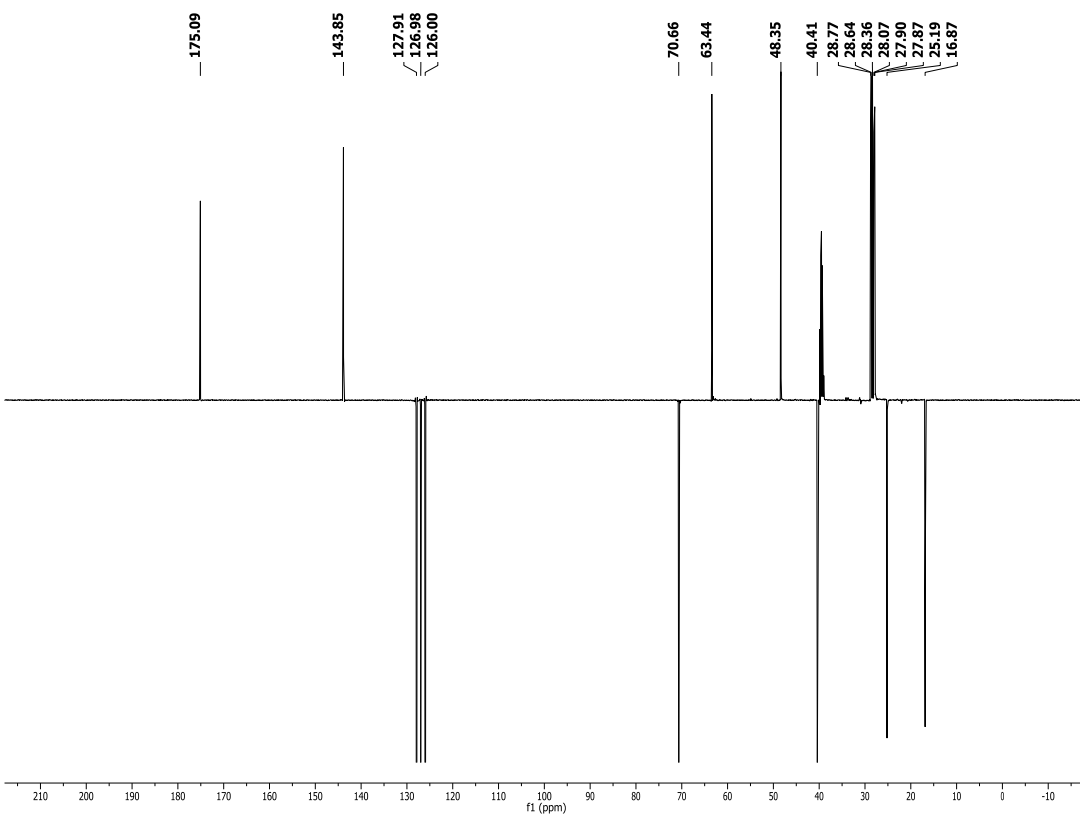



Lactam **8dd**

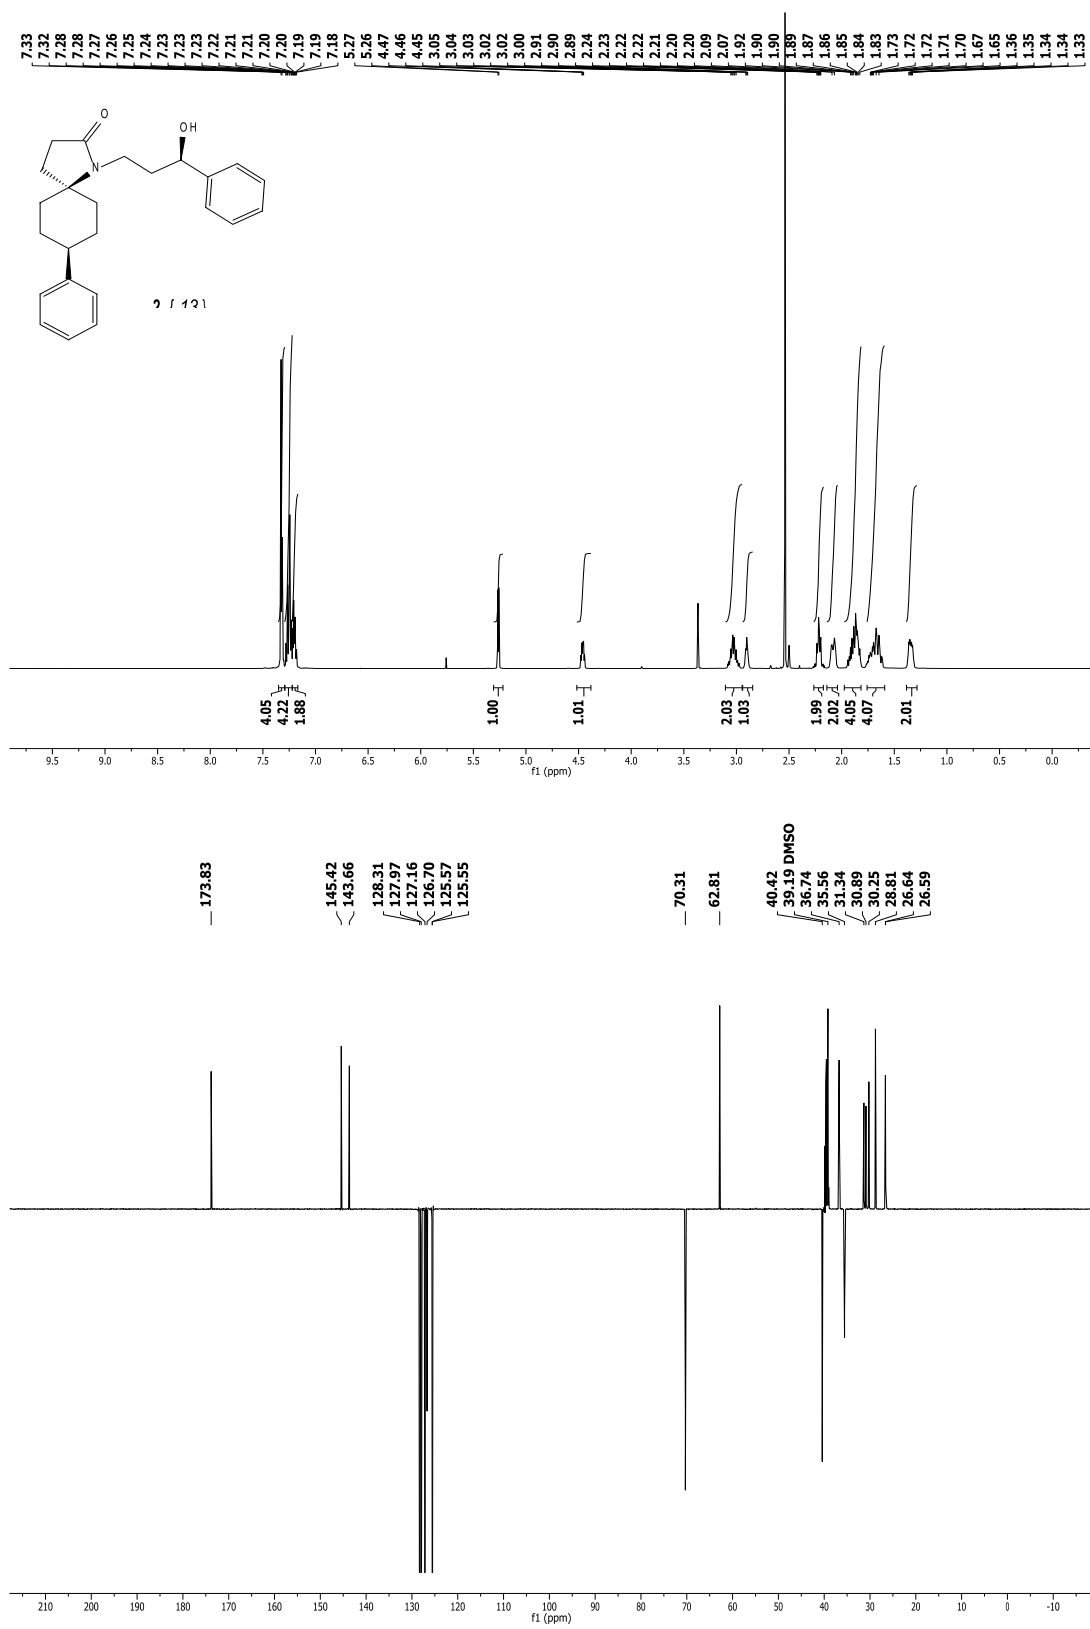

Lactam **8fd**

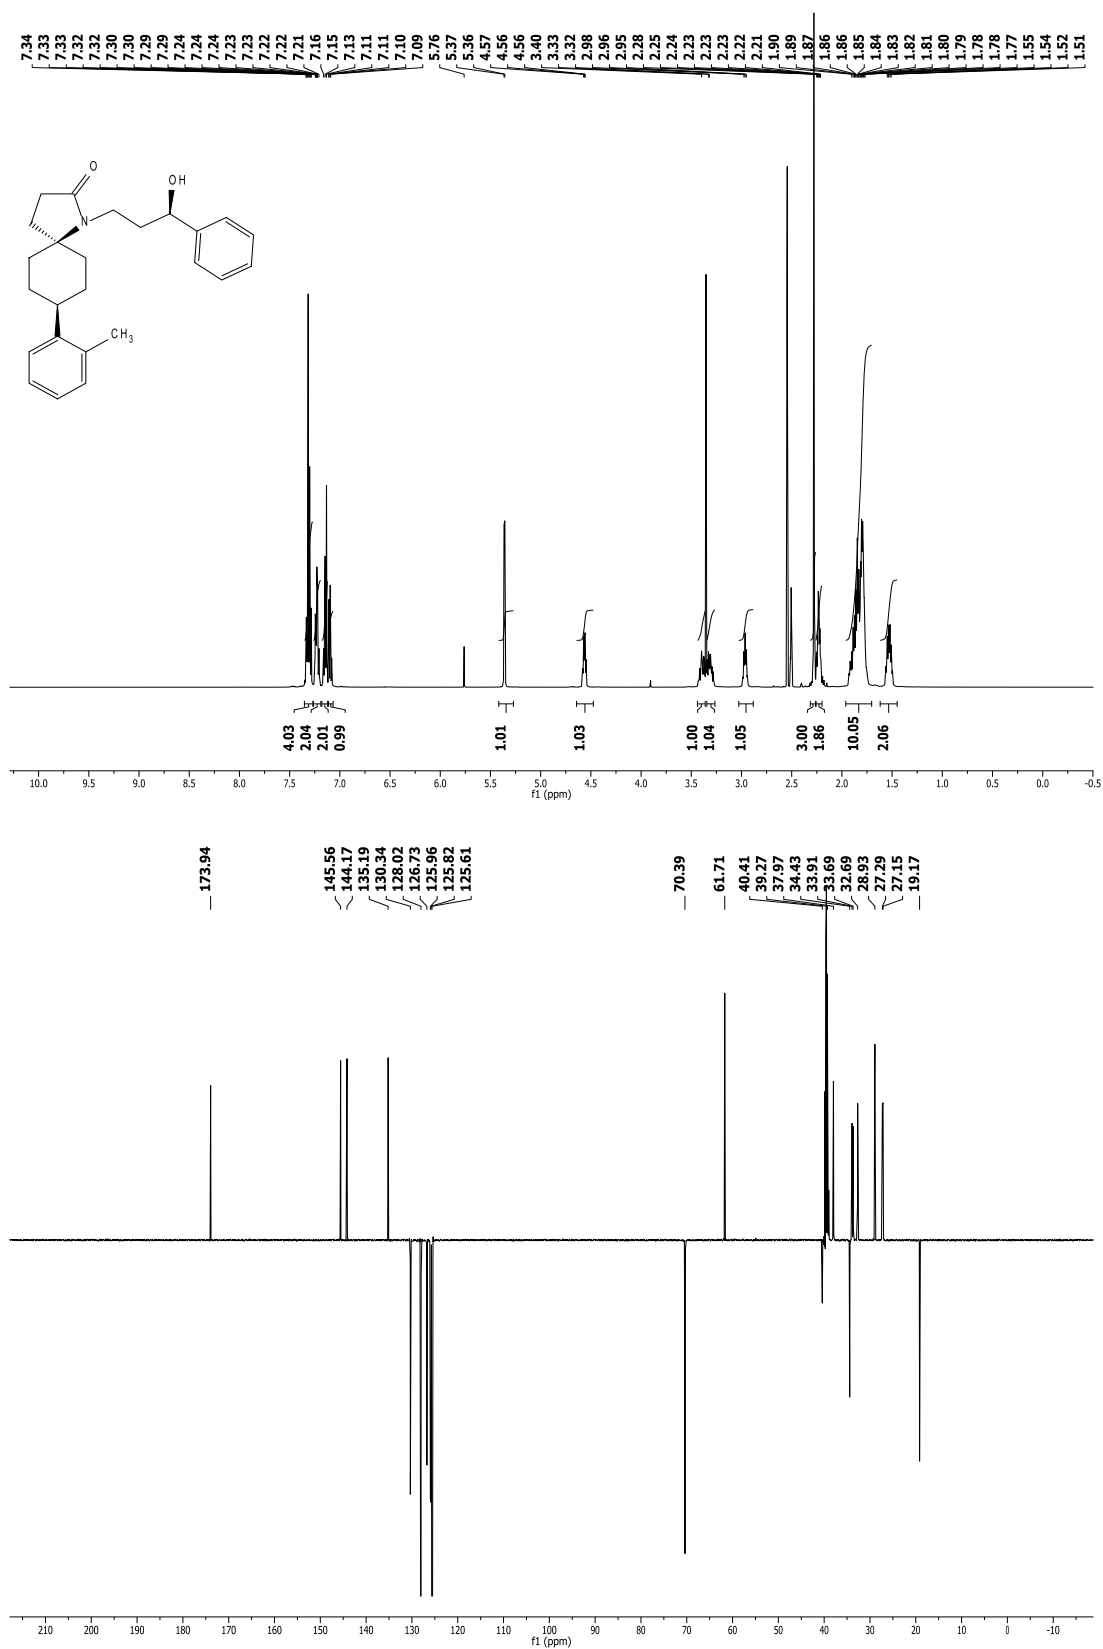

# Lactam 9ga

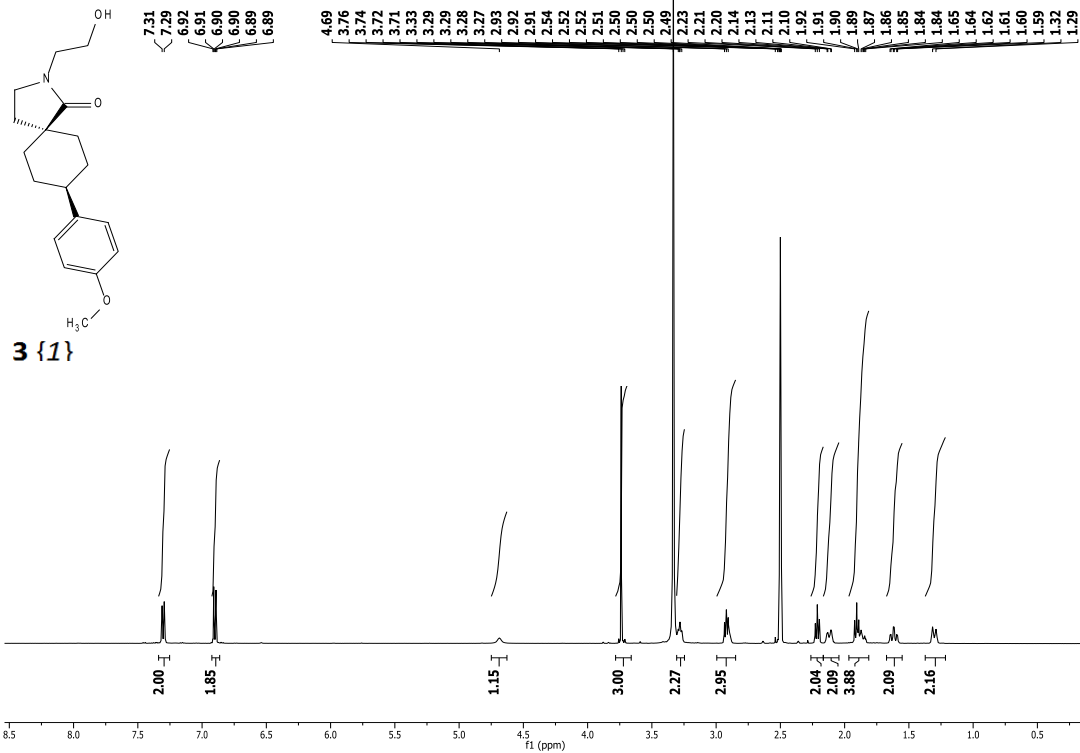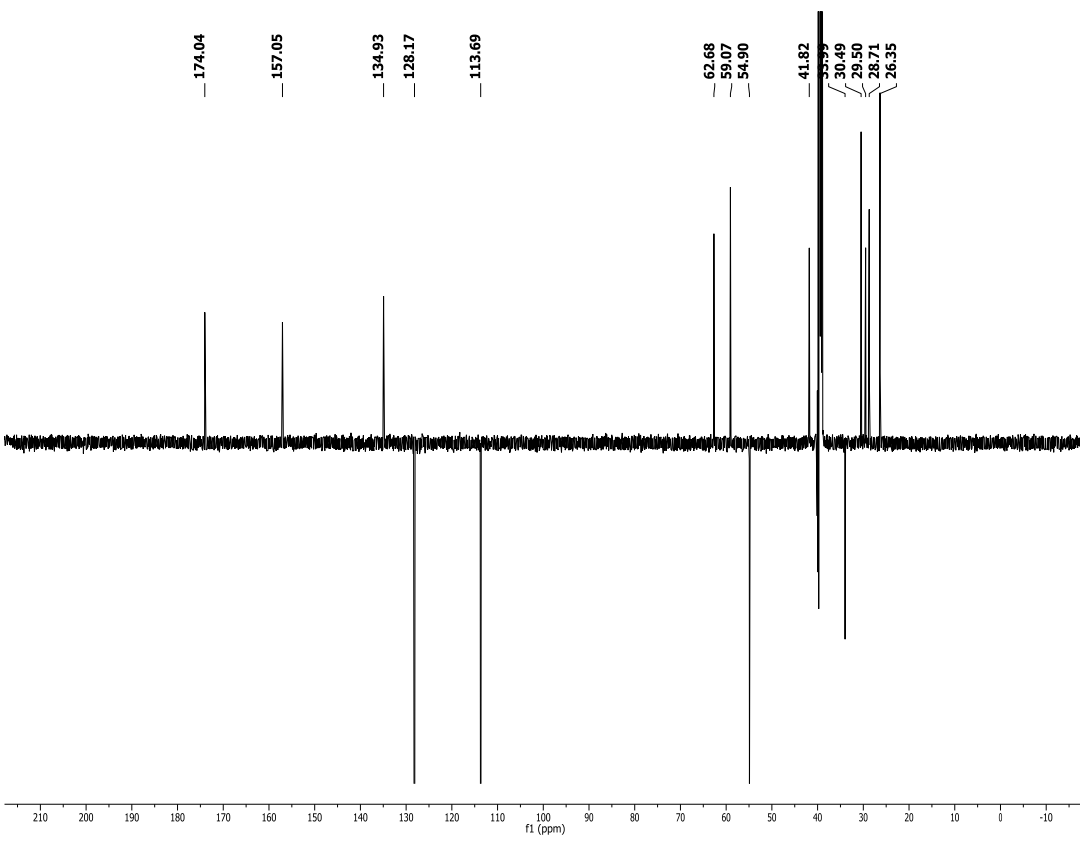

Lactam 9ha

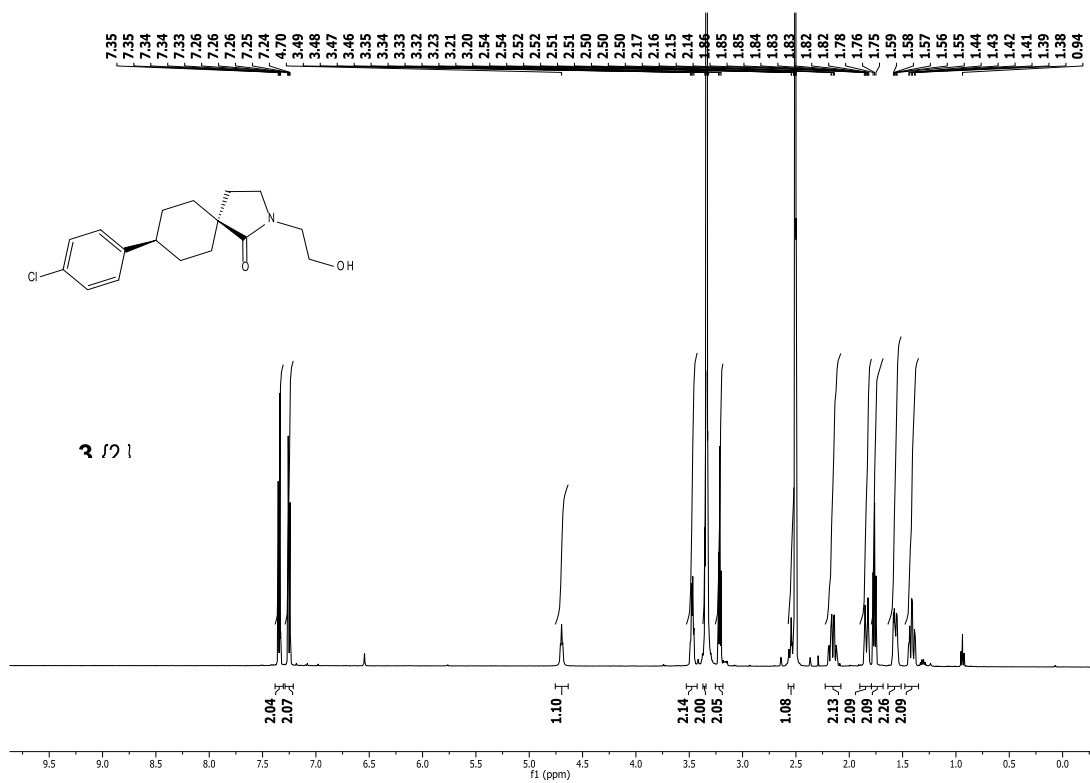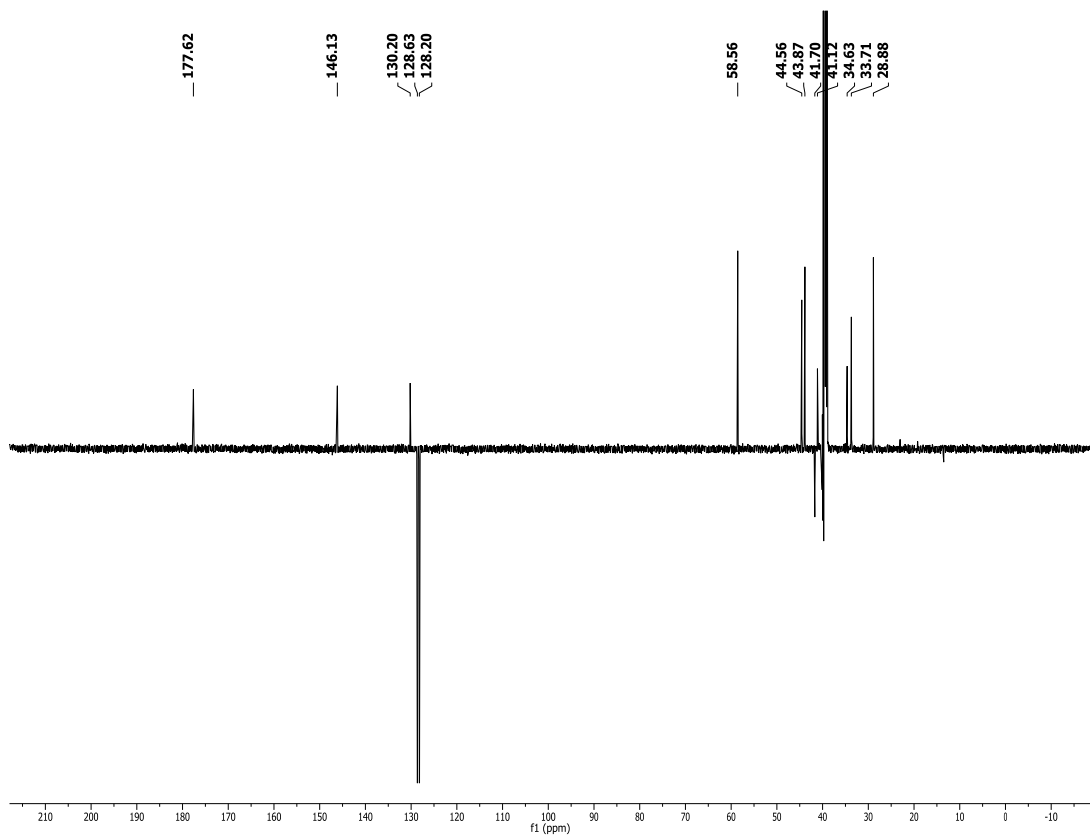

Lactam 9dd

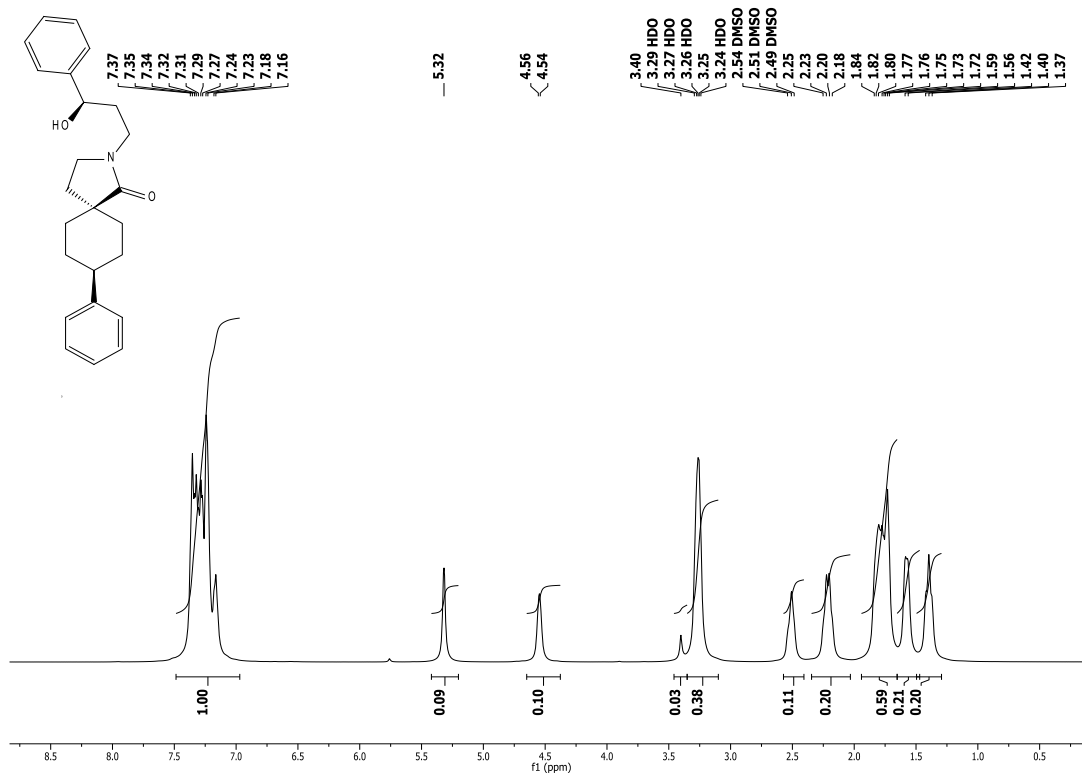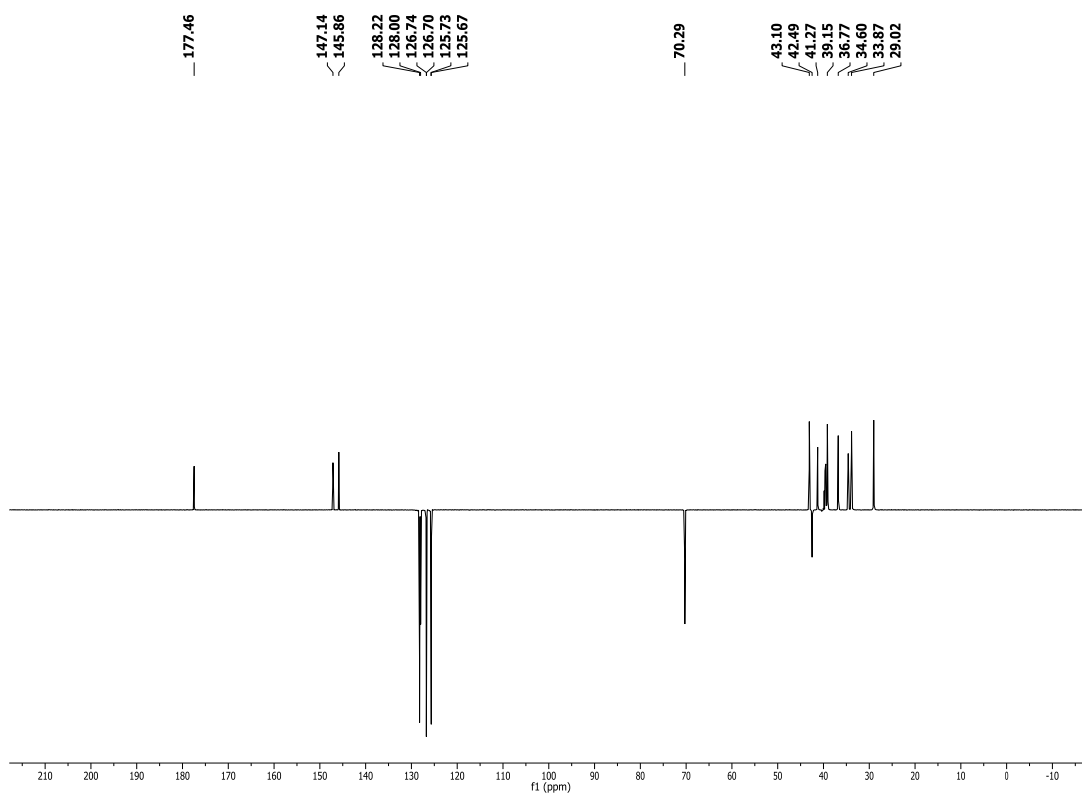

Lactam **9fd**

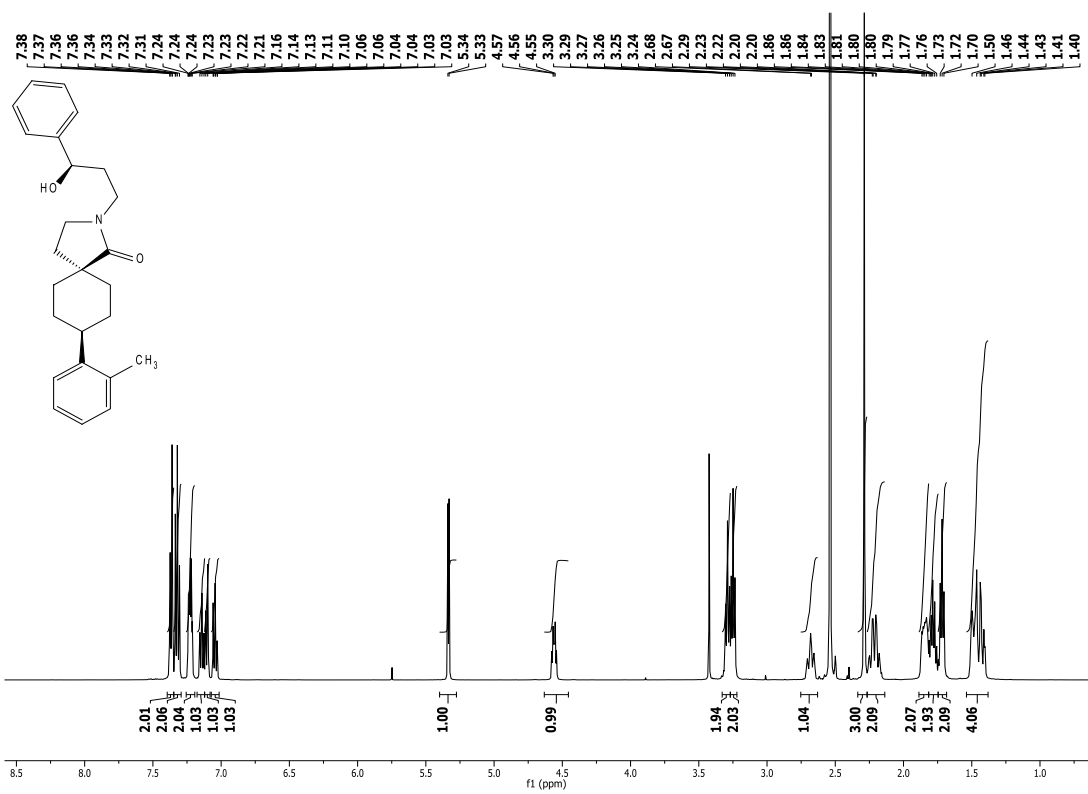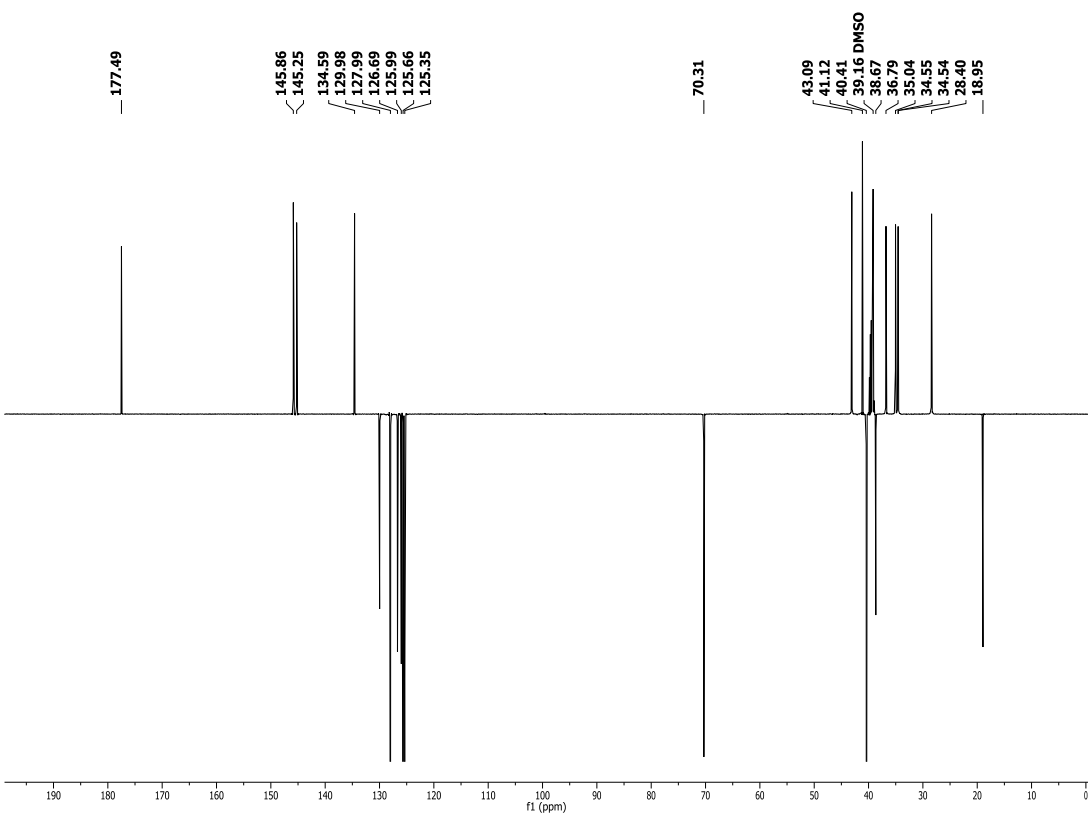

Alcohol S9a

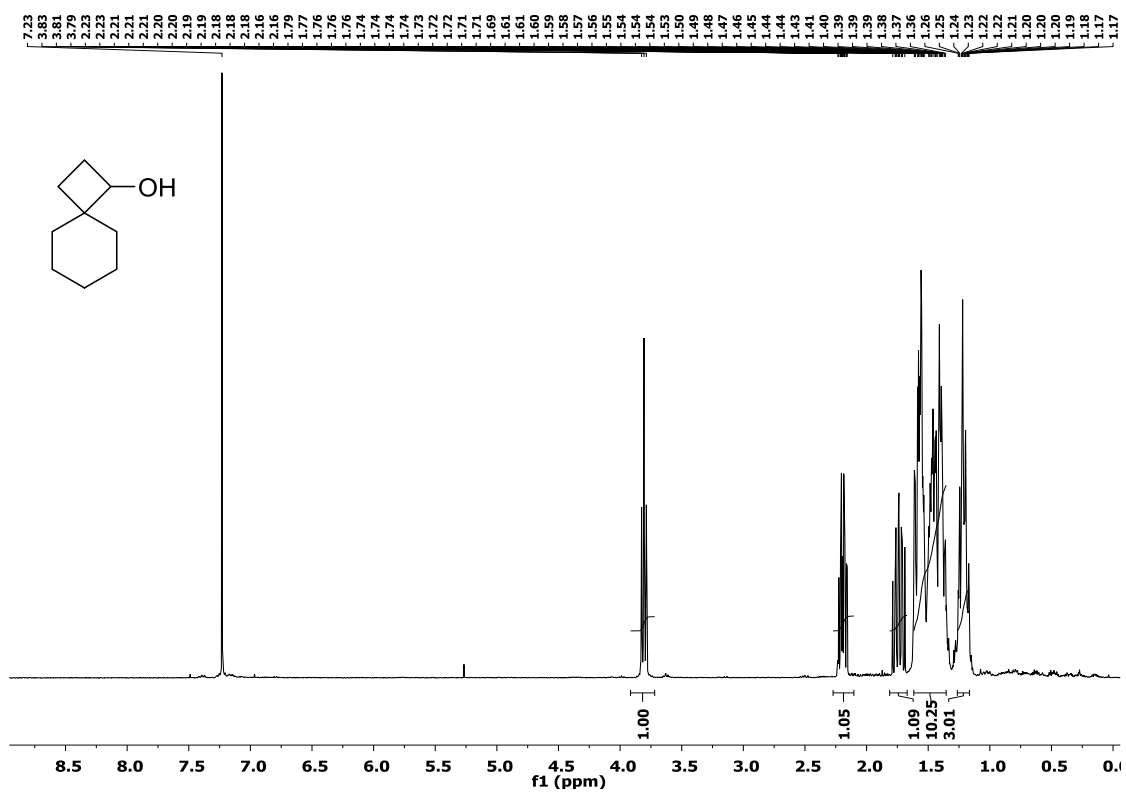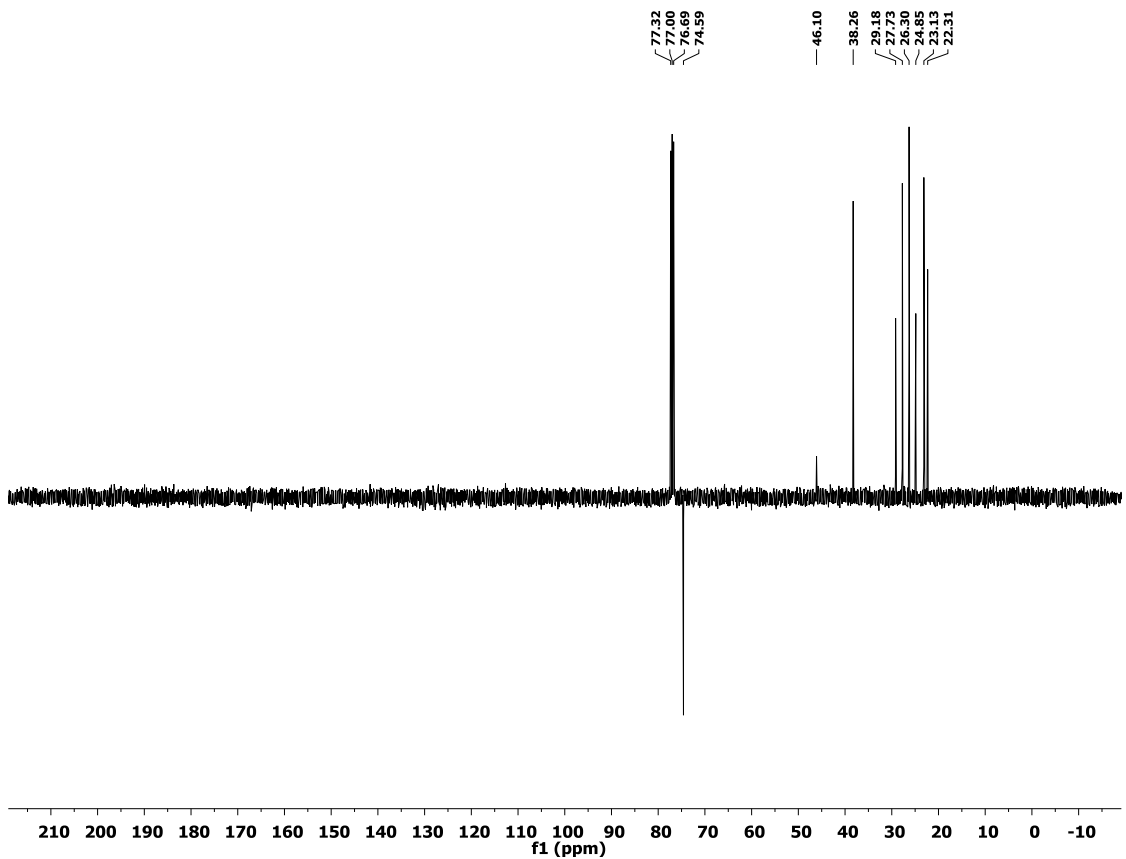

Alcohol S9c

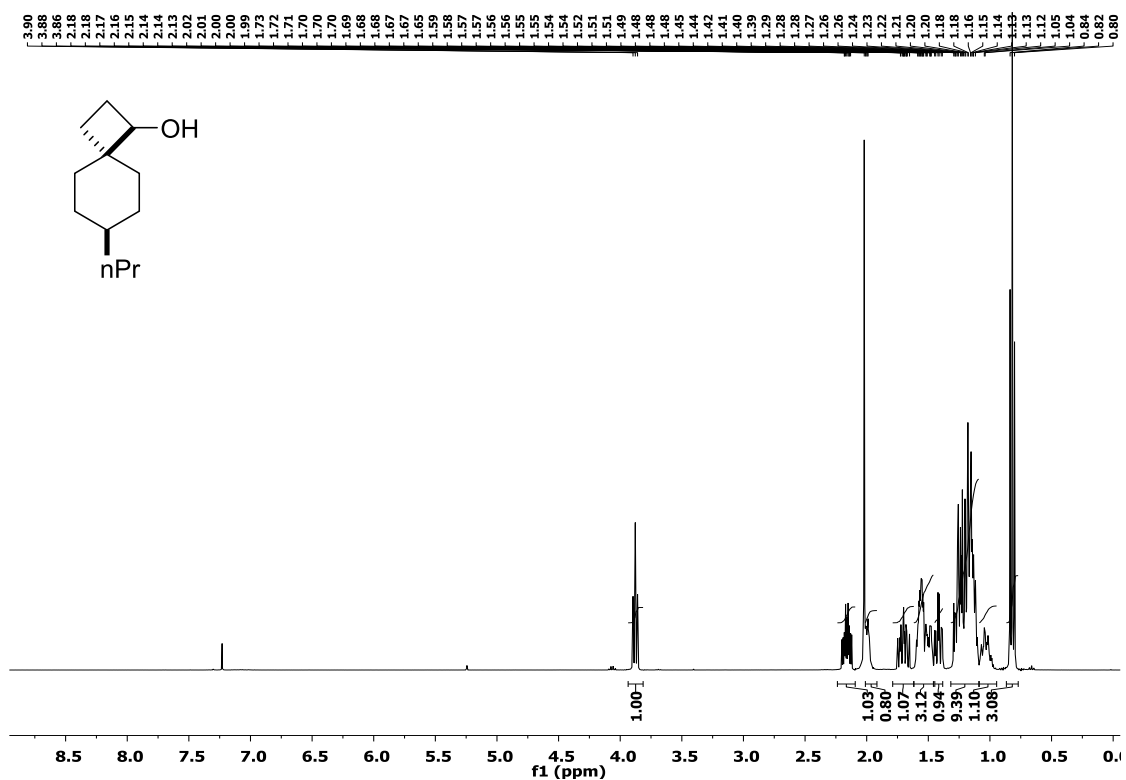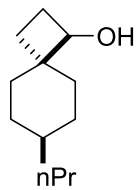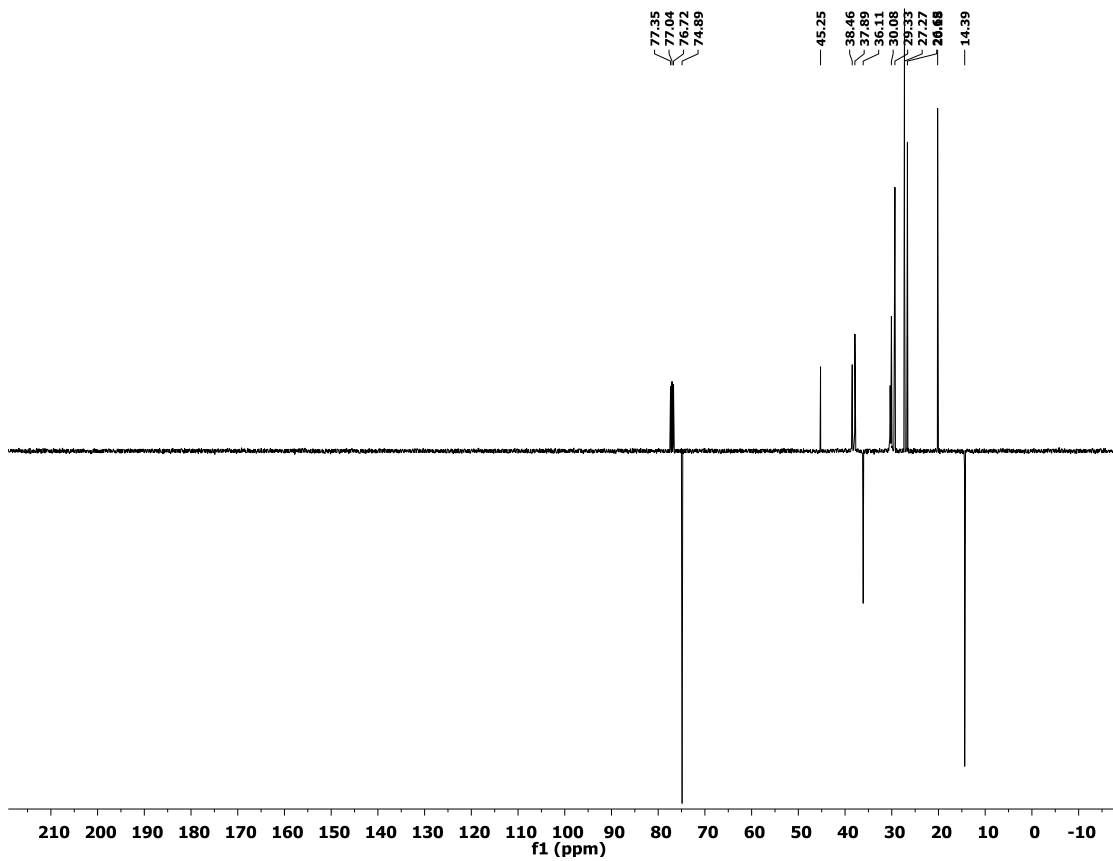



Alcohol S9d

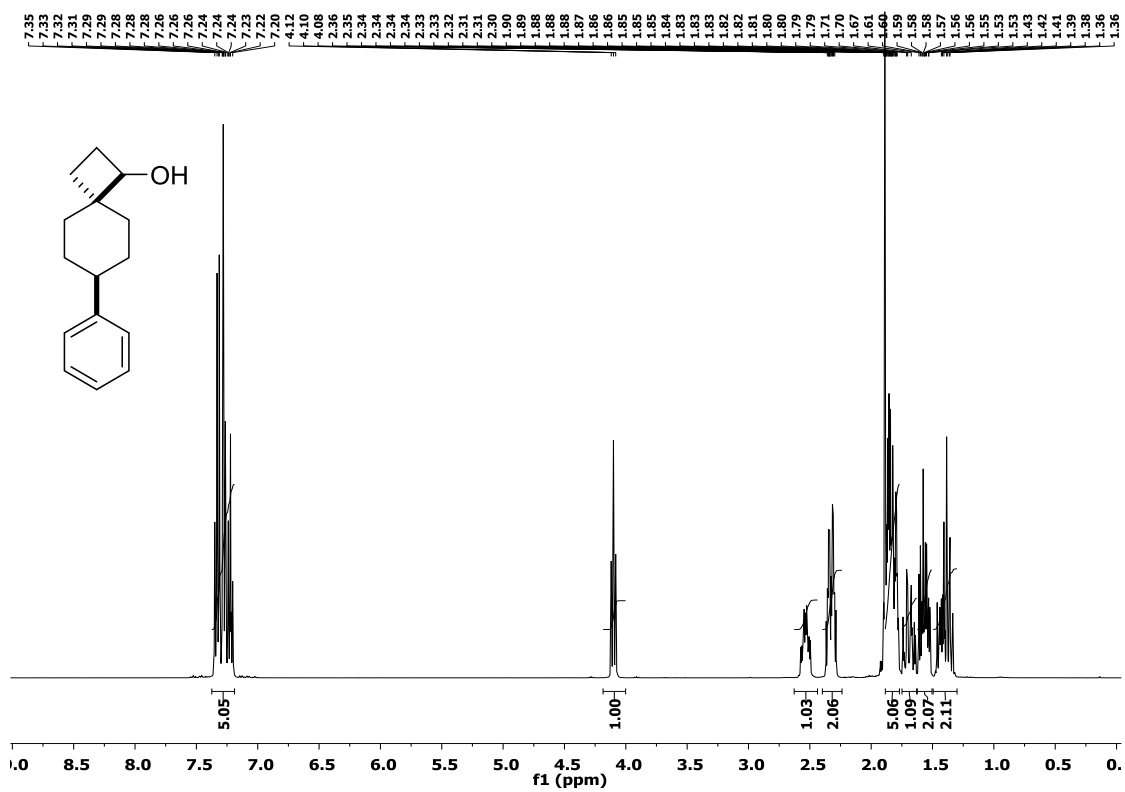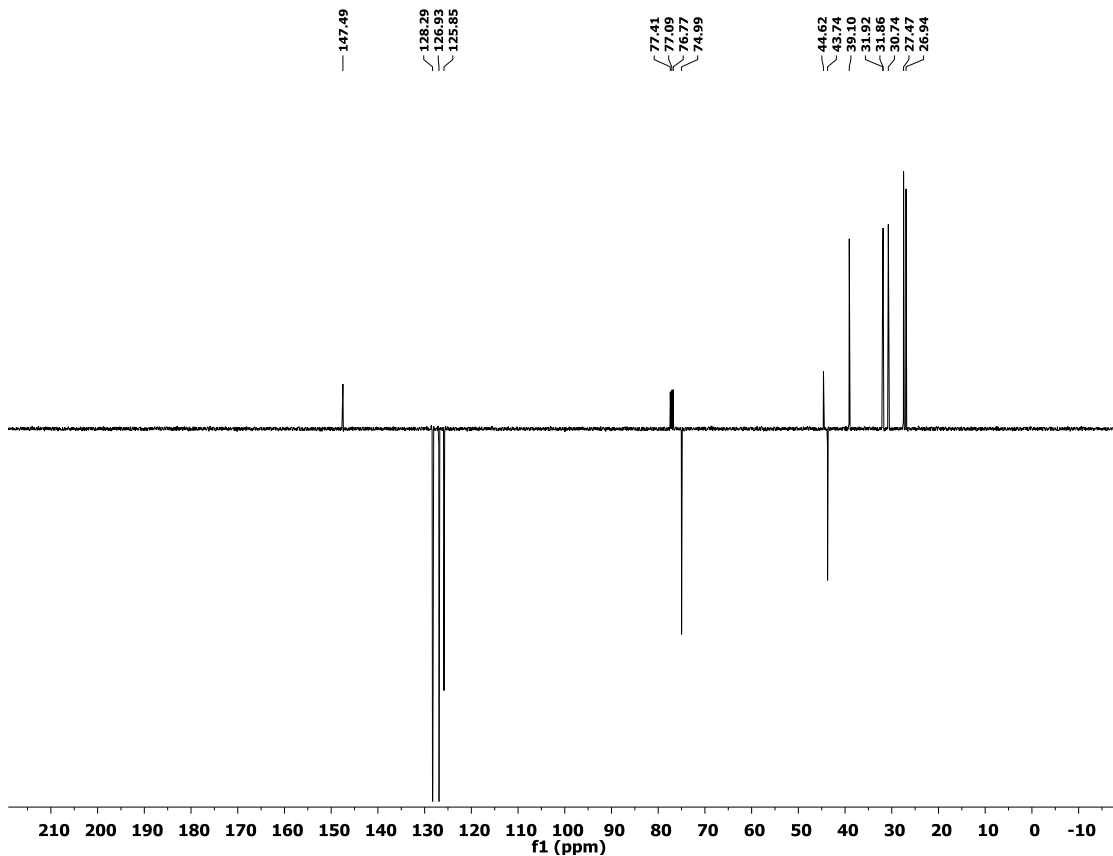

Carbamate **36db**{21}

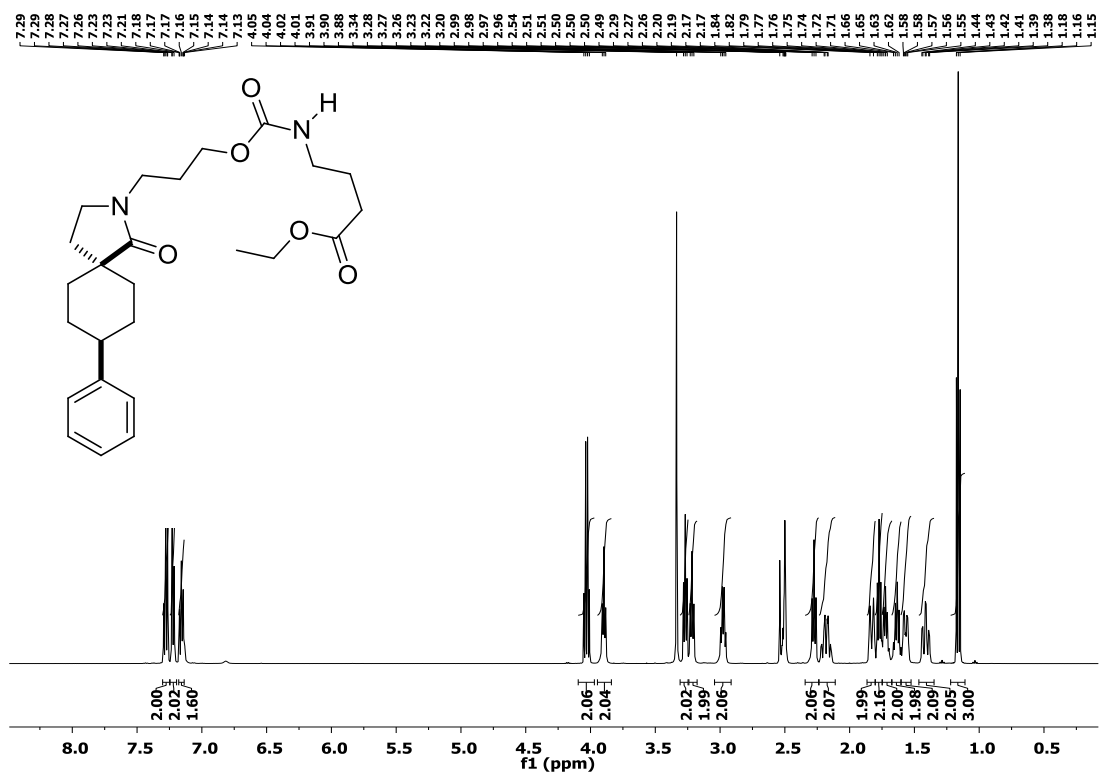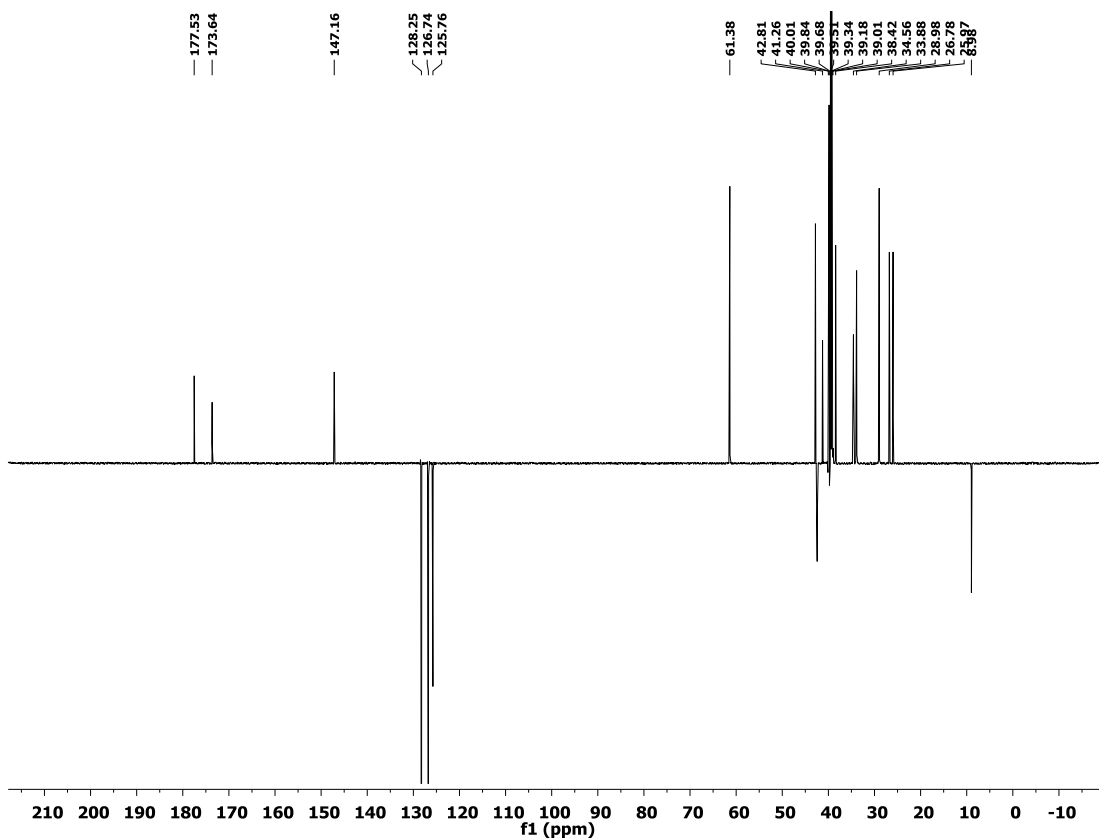

Carbamate **36db**{18}

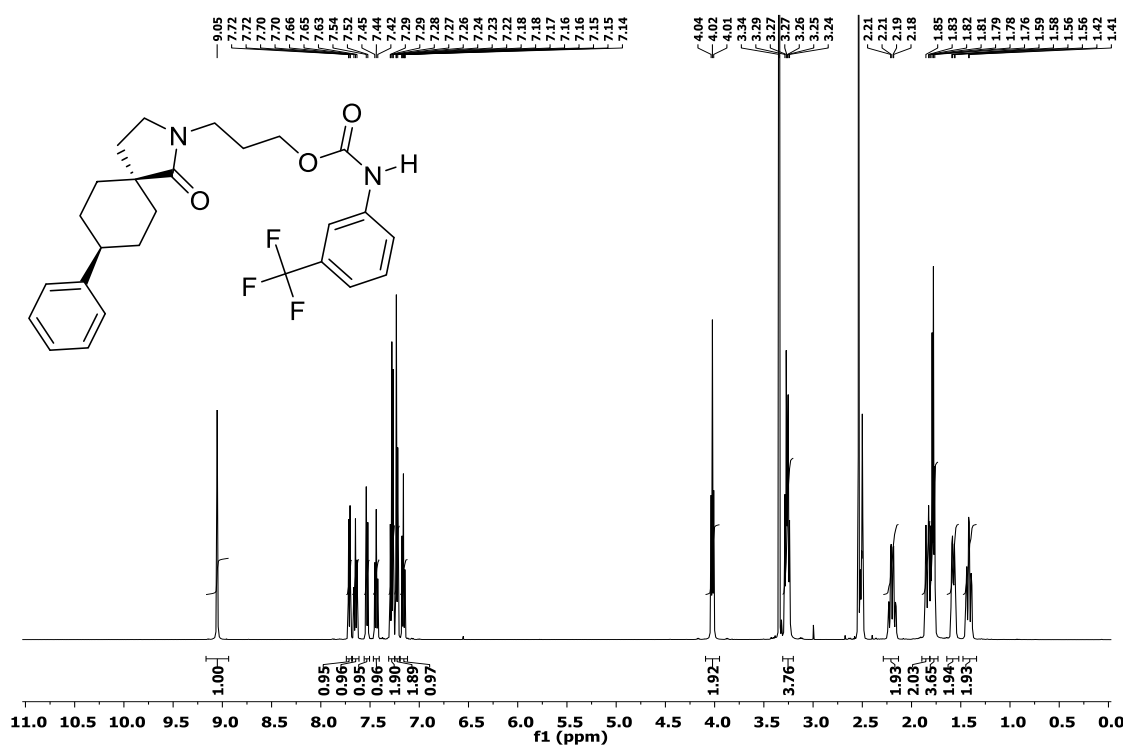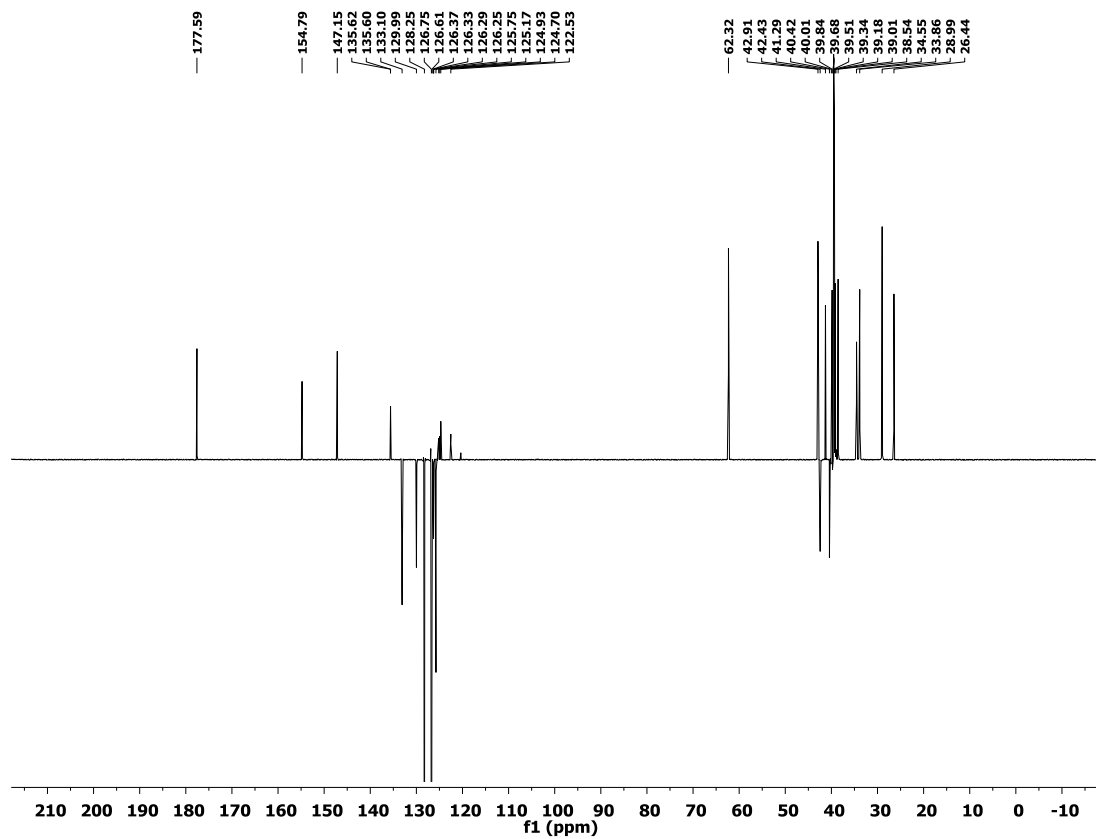

Carbamate **36bb**{16}

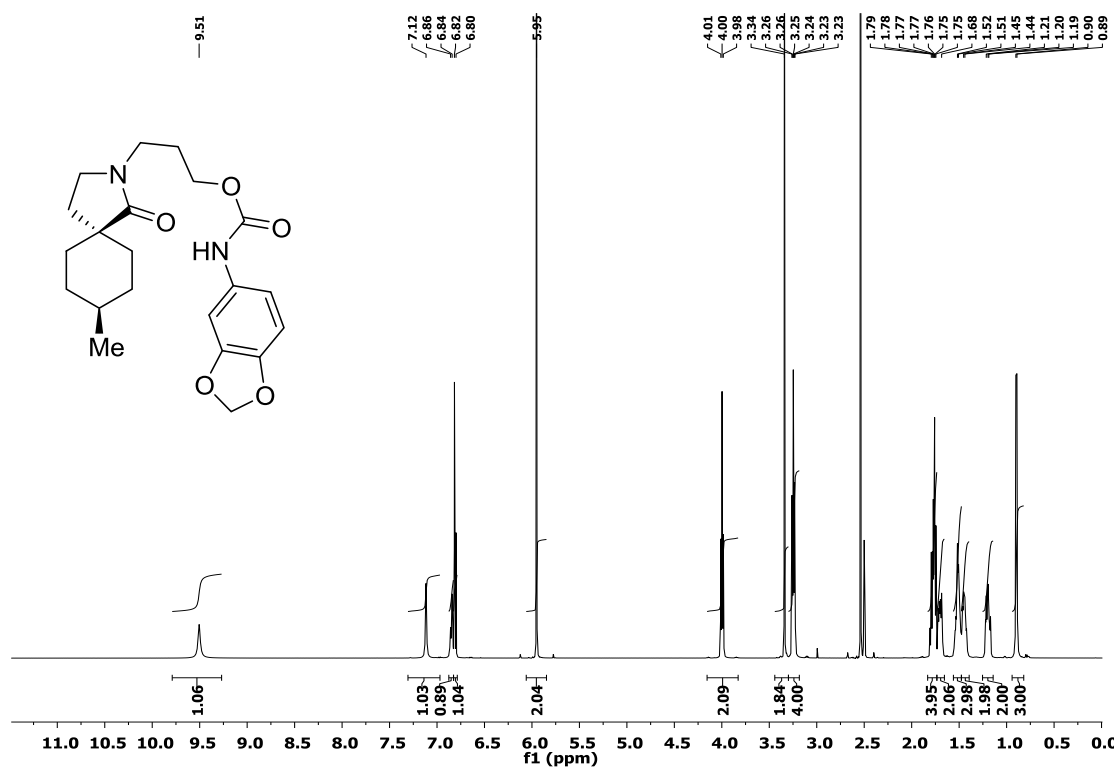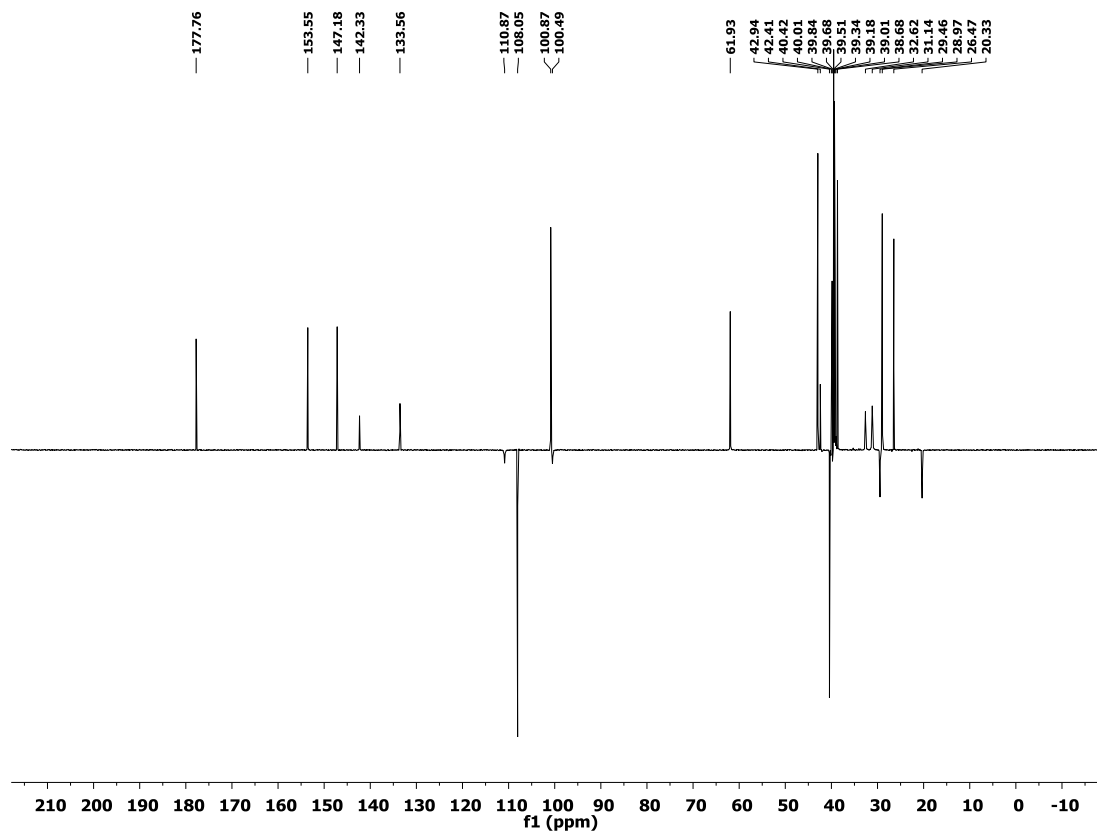

Carbamate **36db**{12}

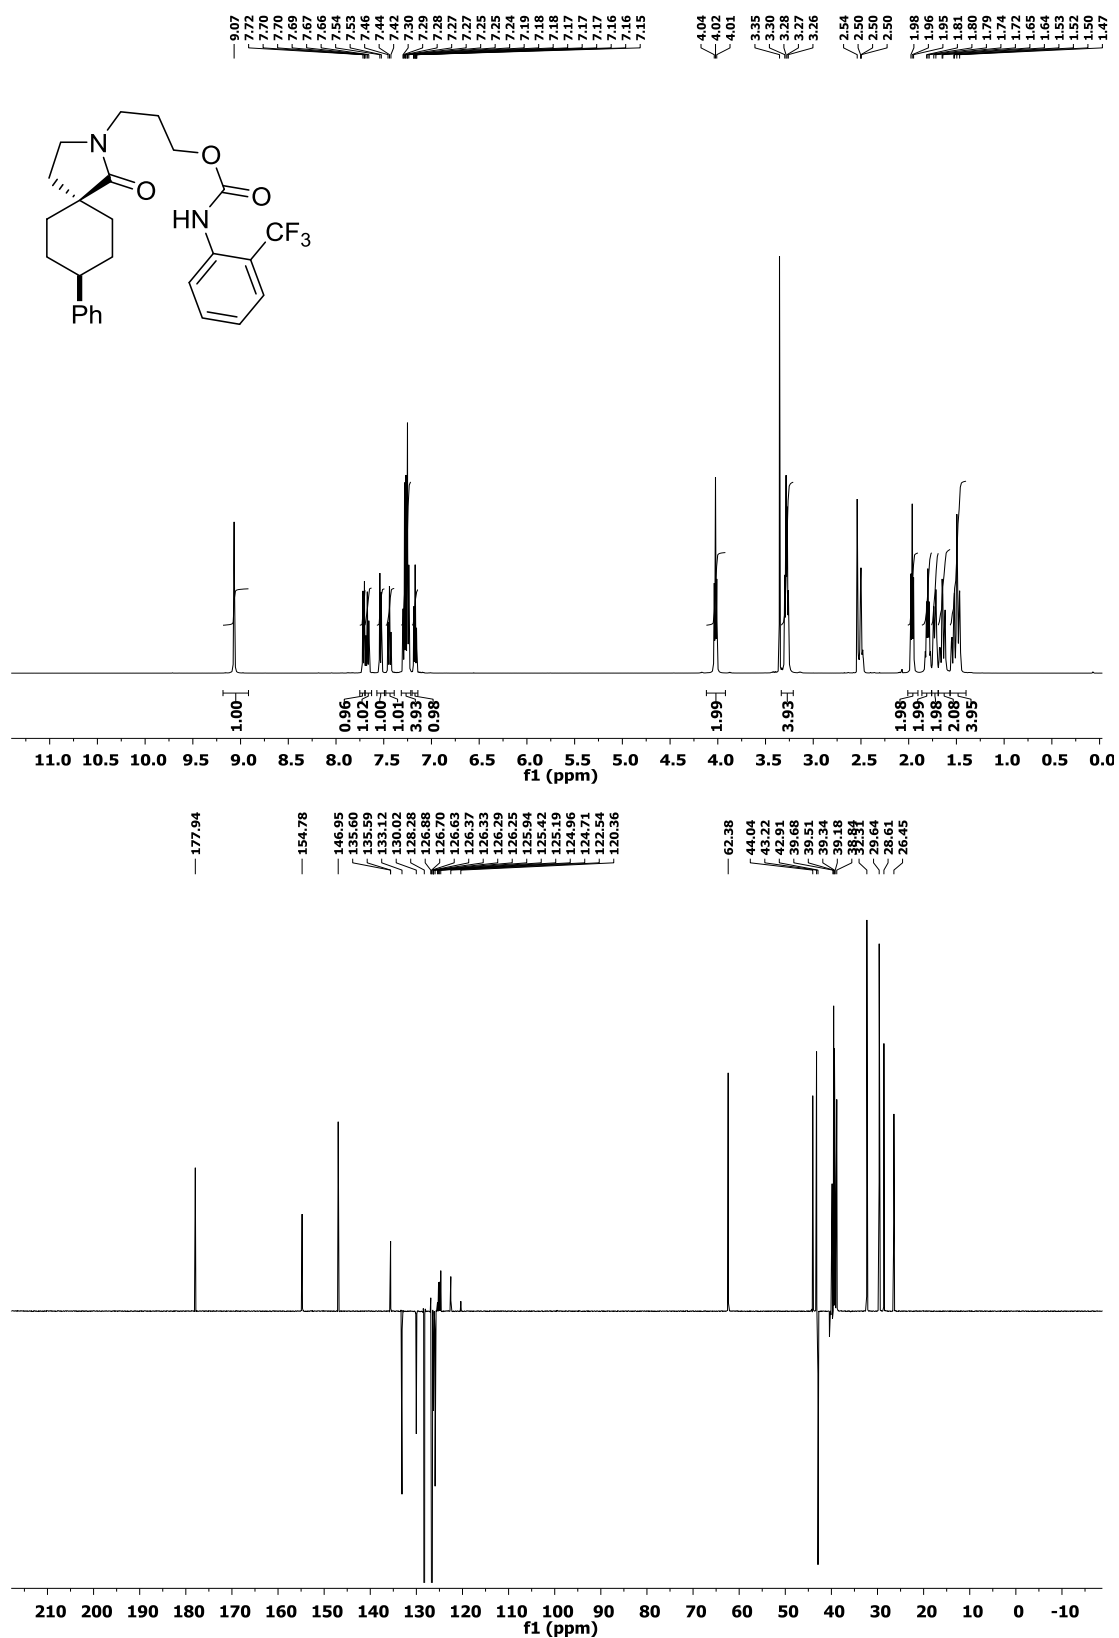

Carbamate **34a**{6}

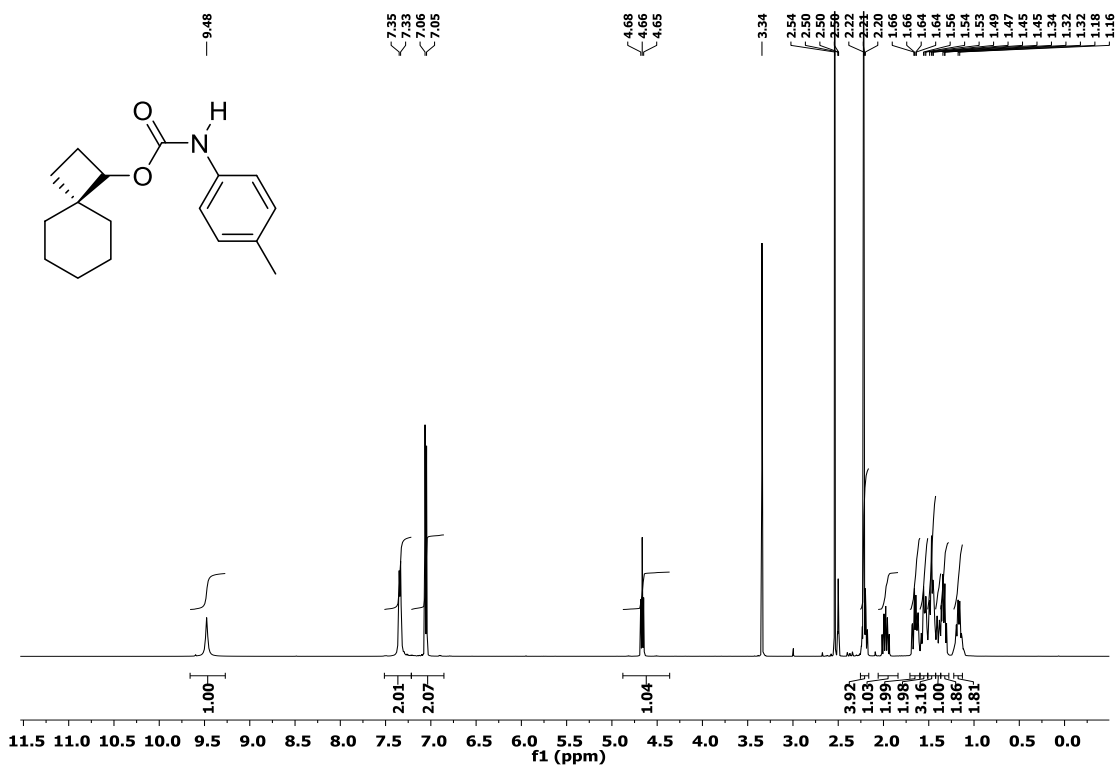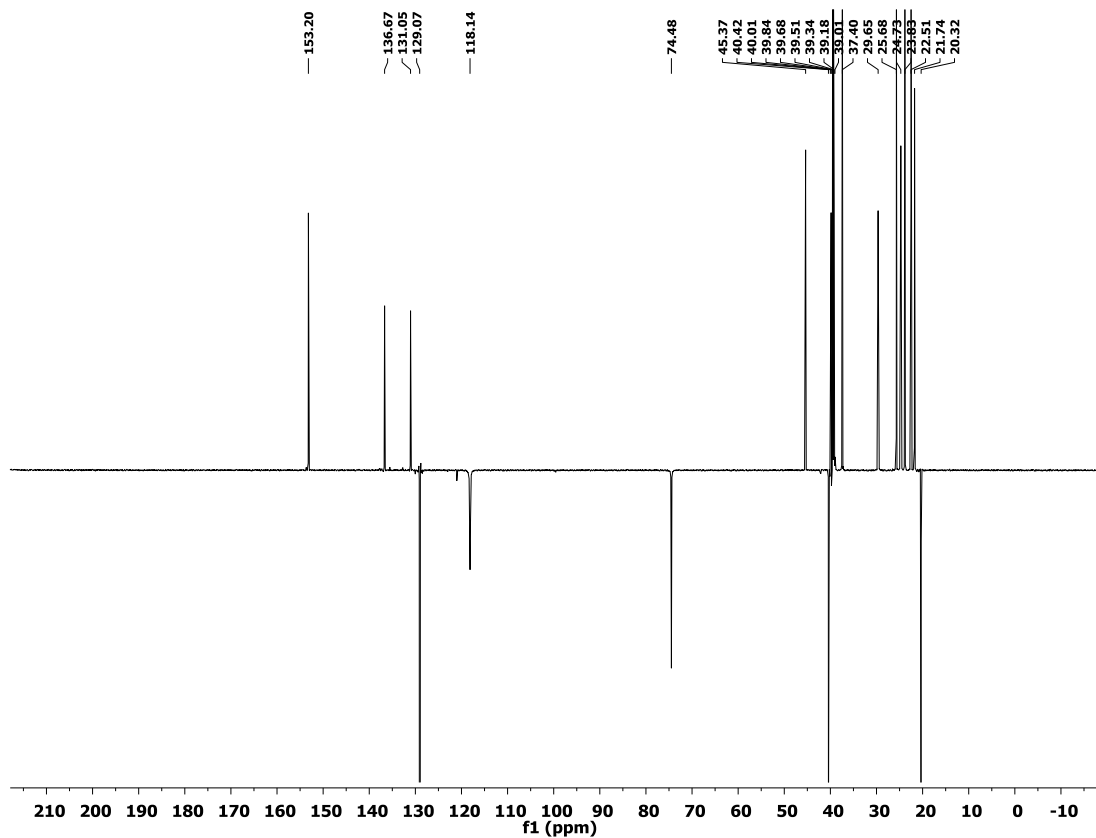

Carbamate **34d**{17}

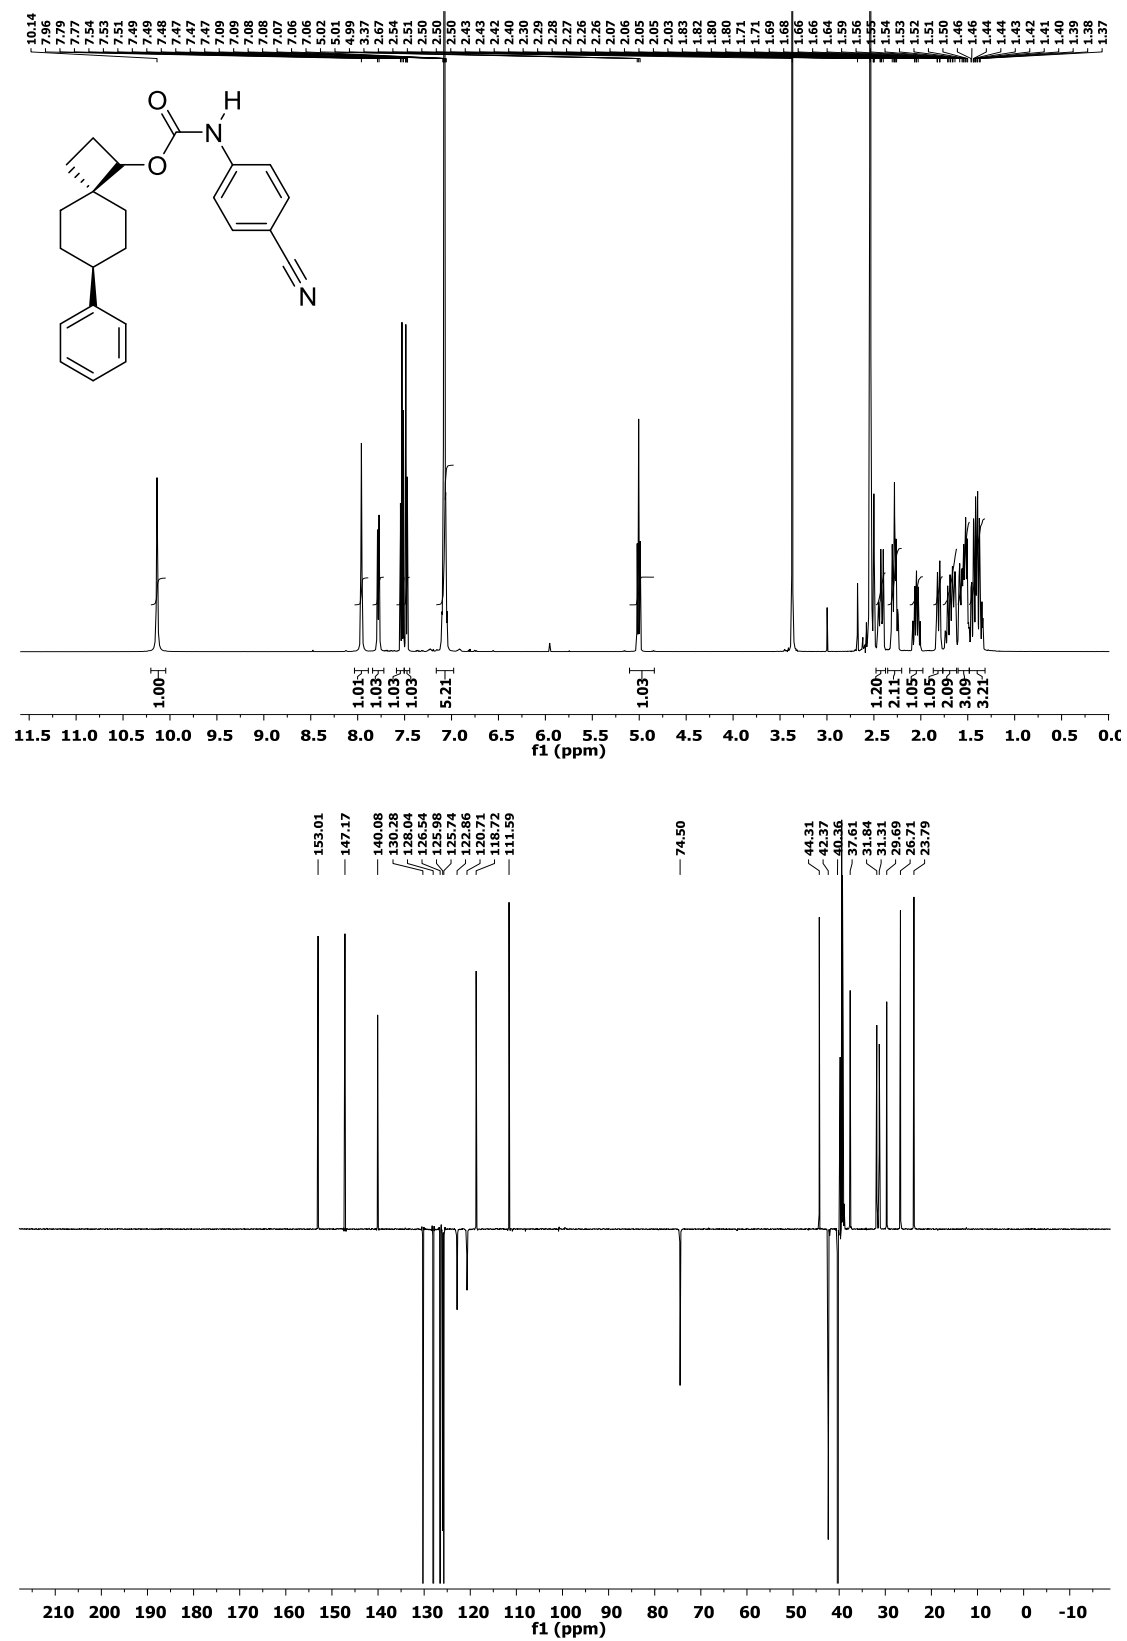

Carbamate **36bb**{15}

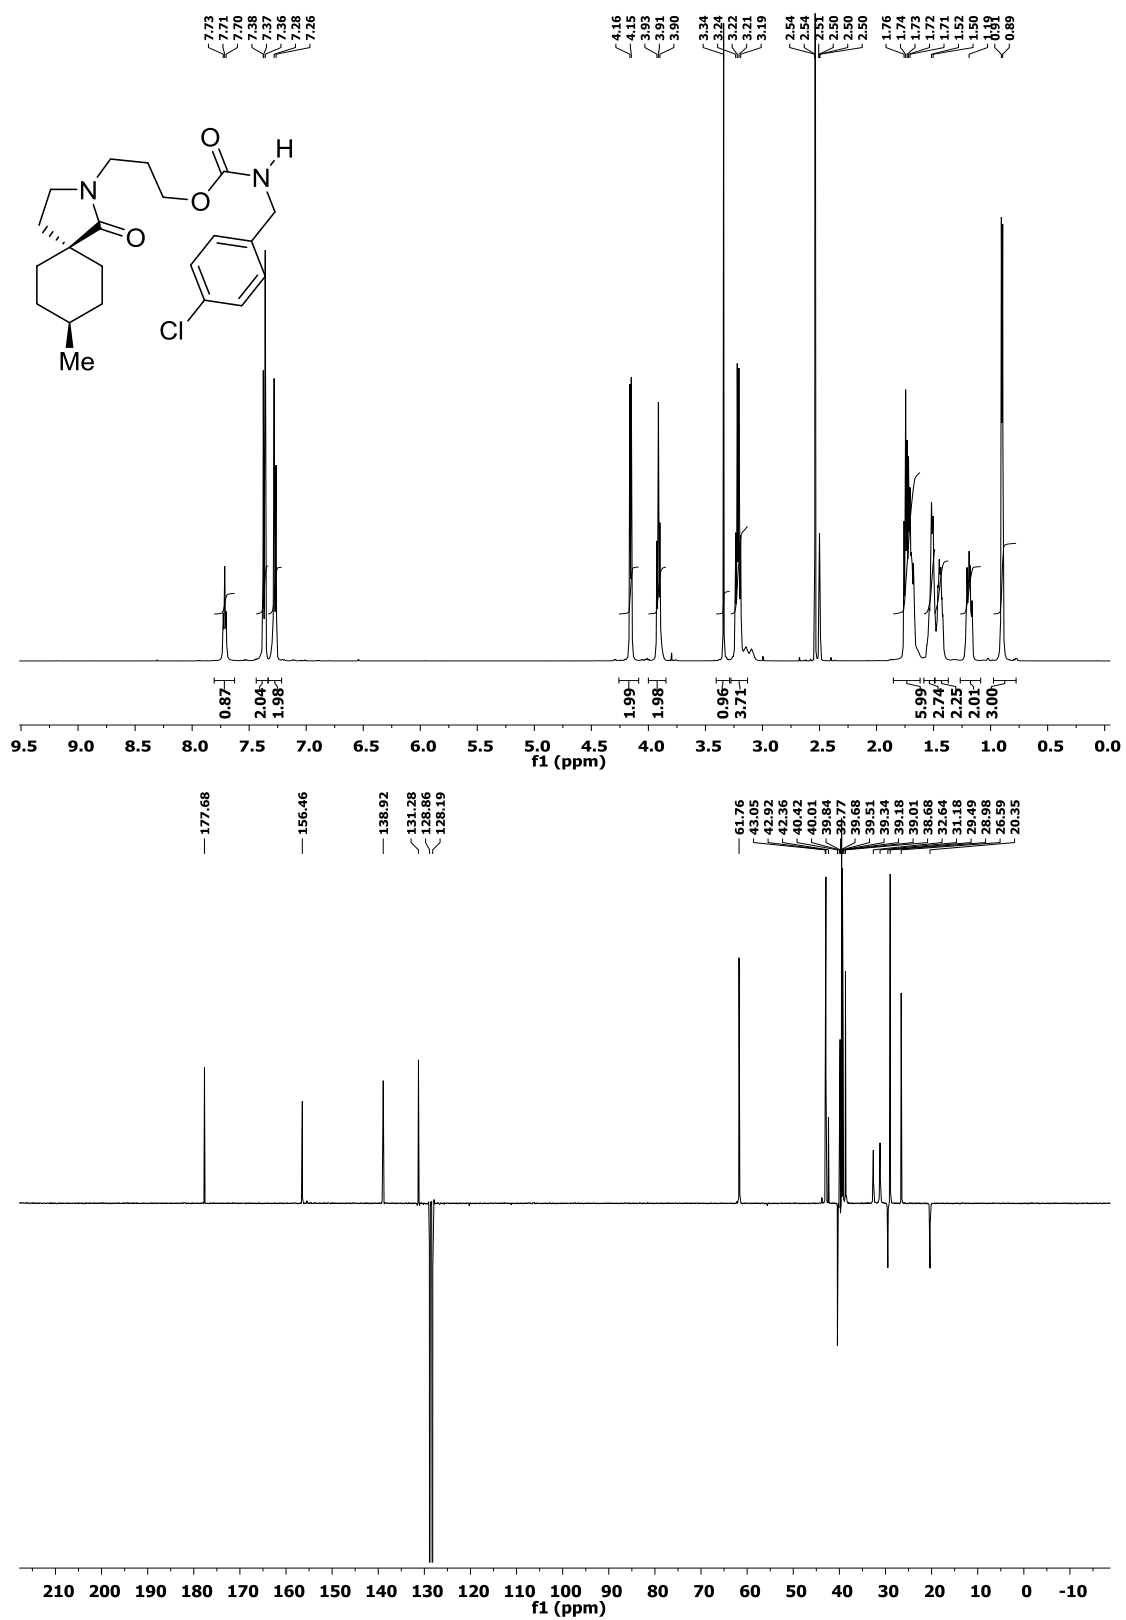



Carbamate **36bb**{5}

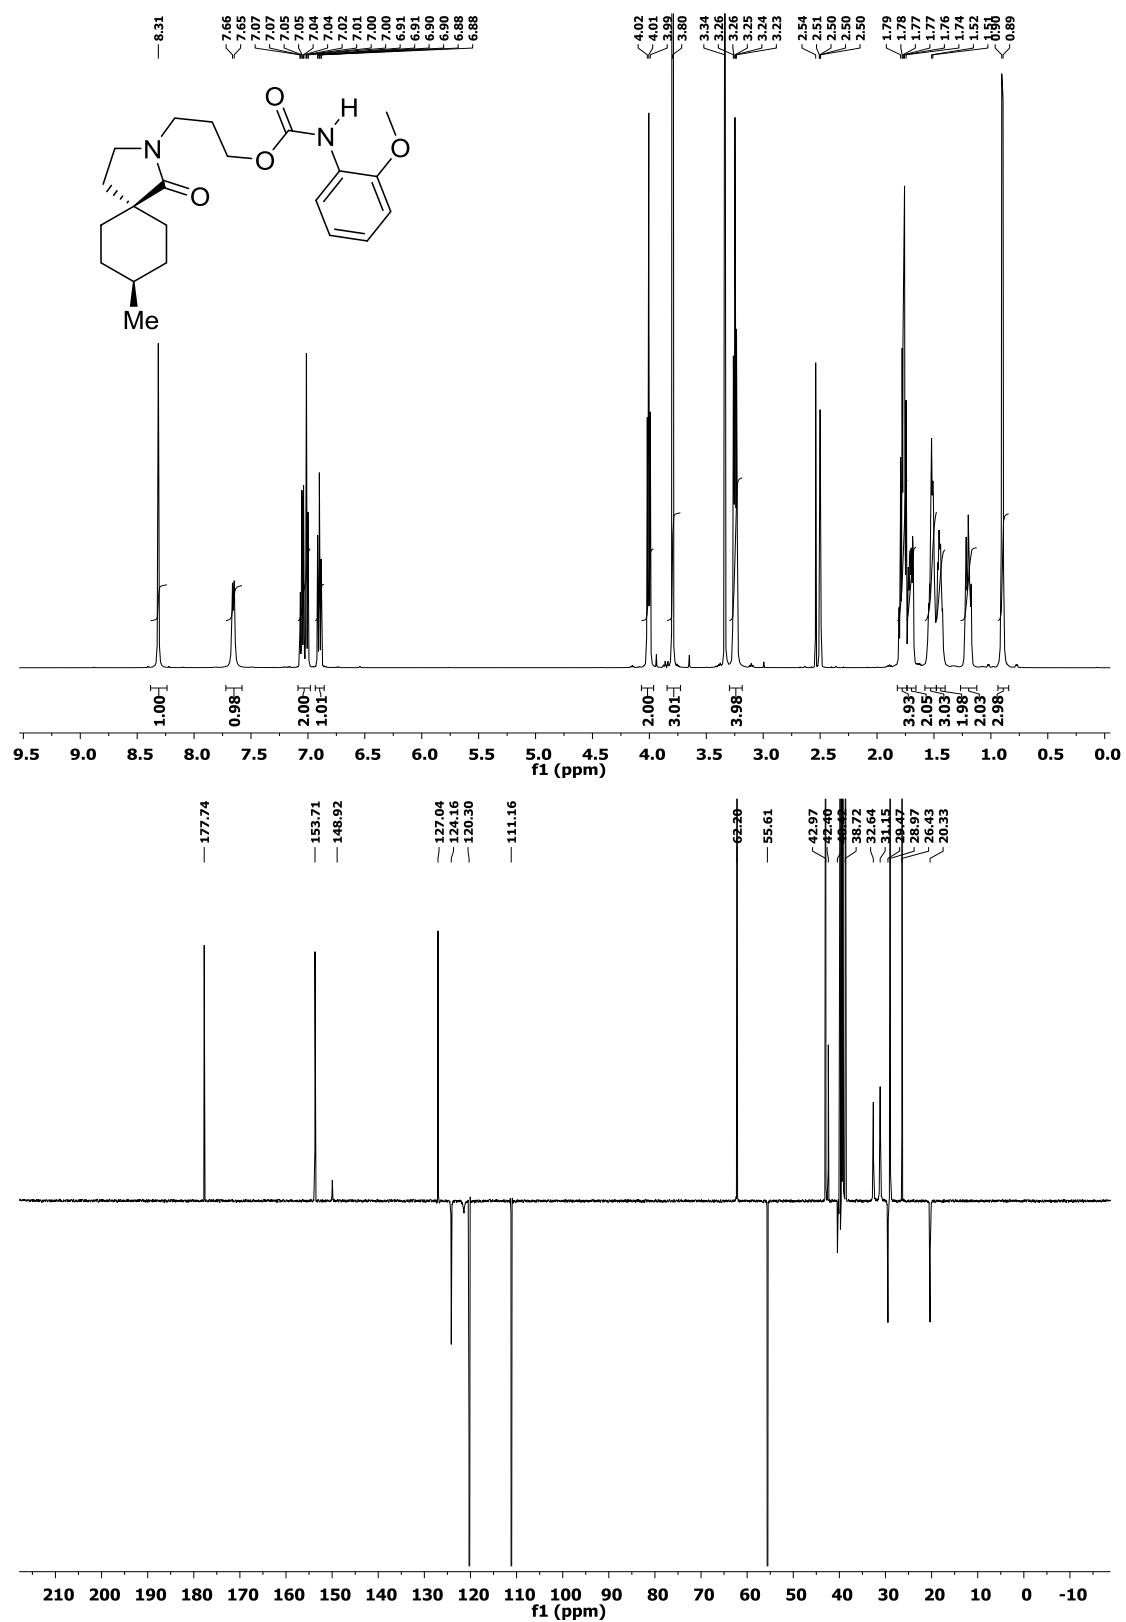

Carbamate **36bb**{22}

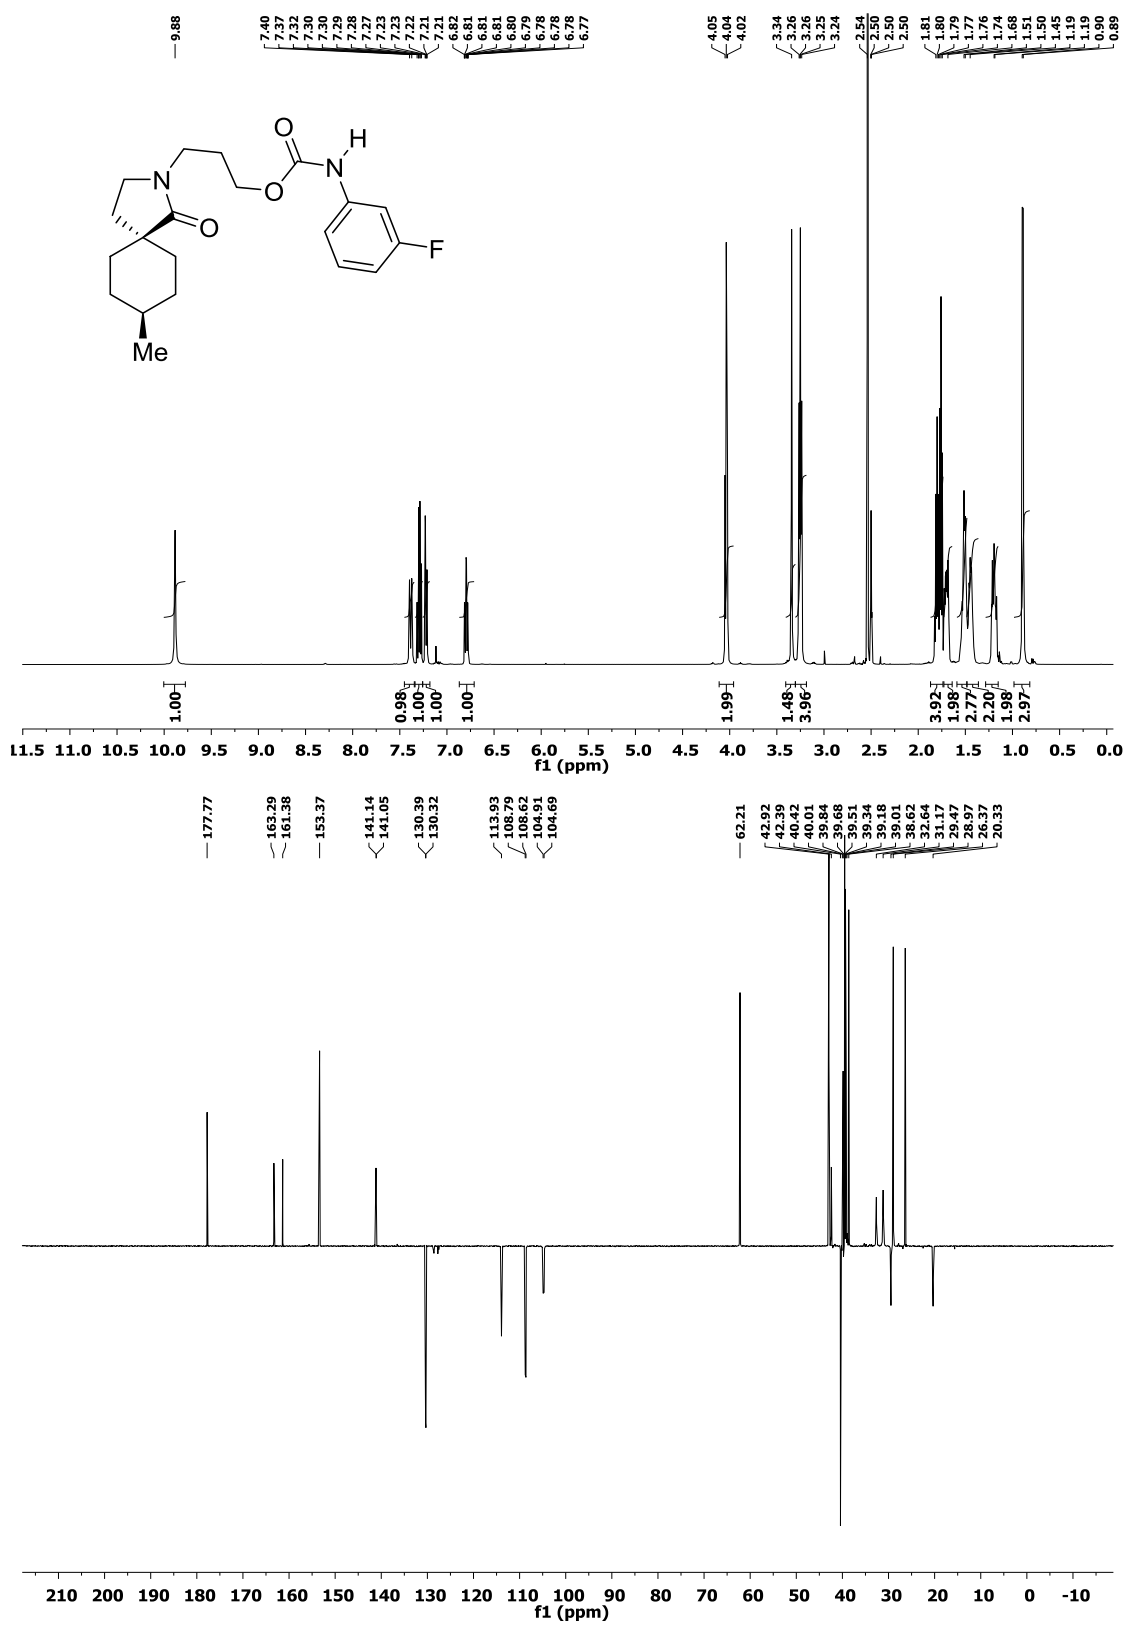

Carbamate **36ab**{2}

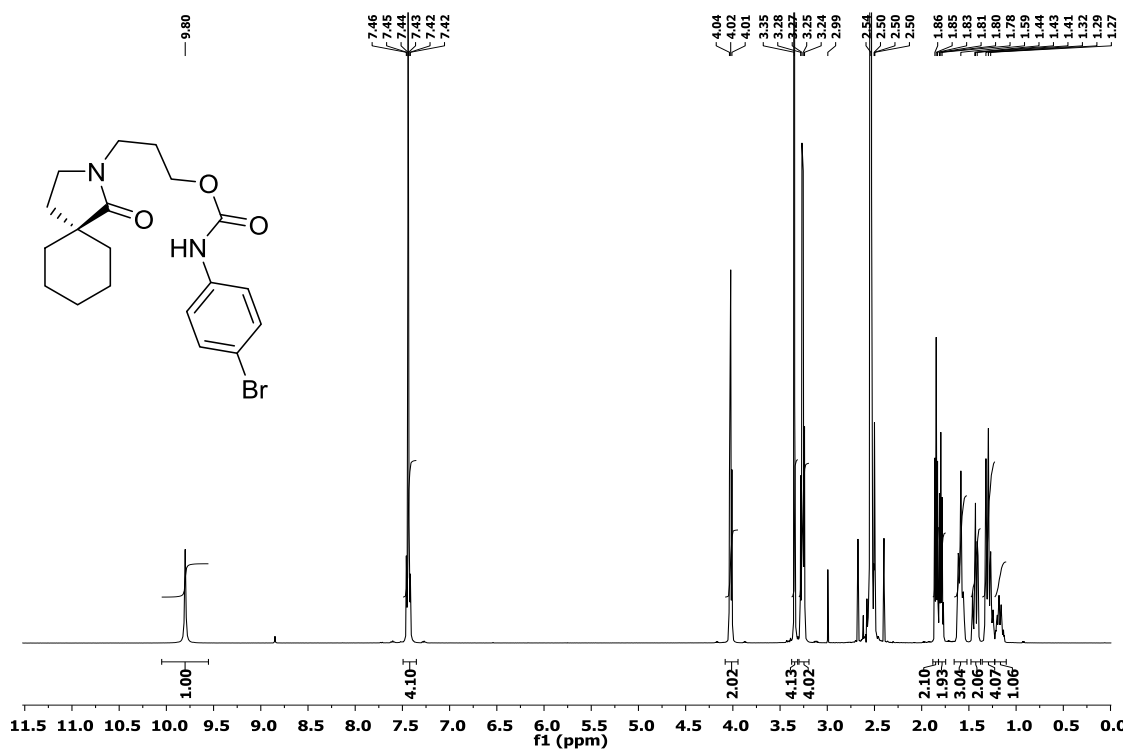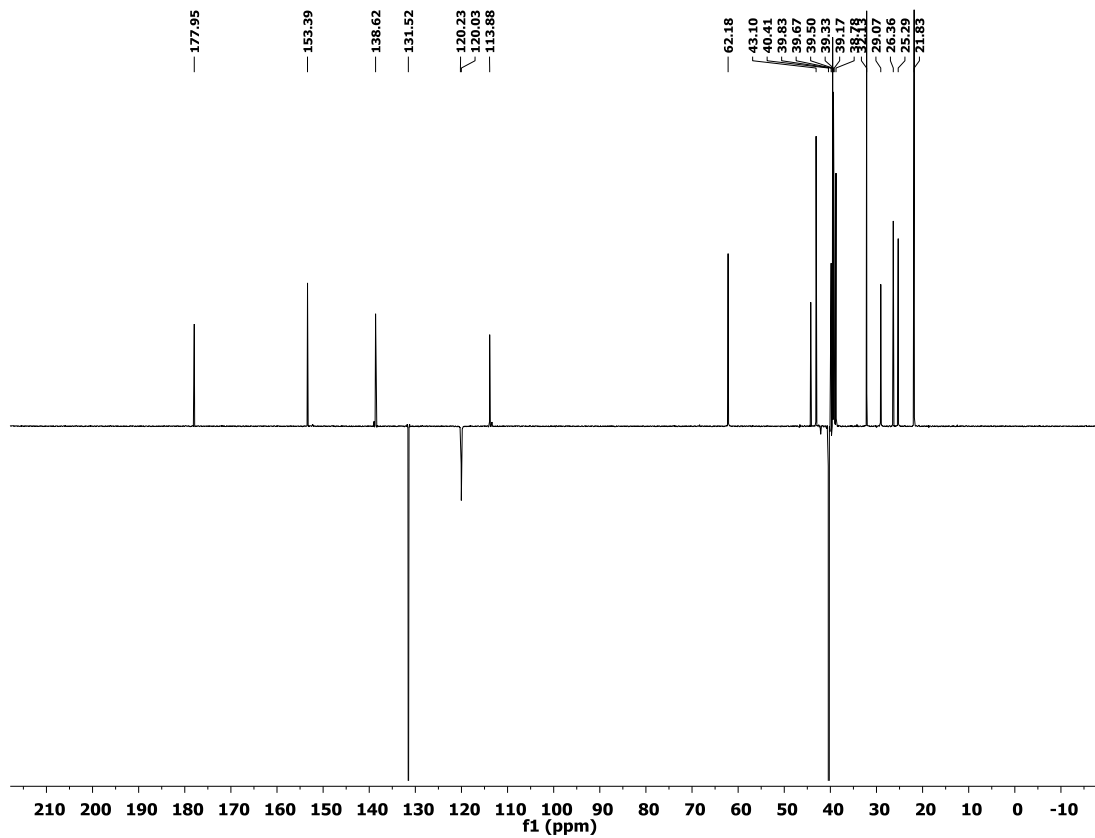

Carbamate **36ab**{31}

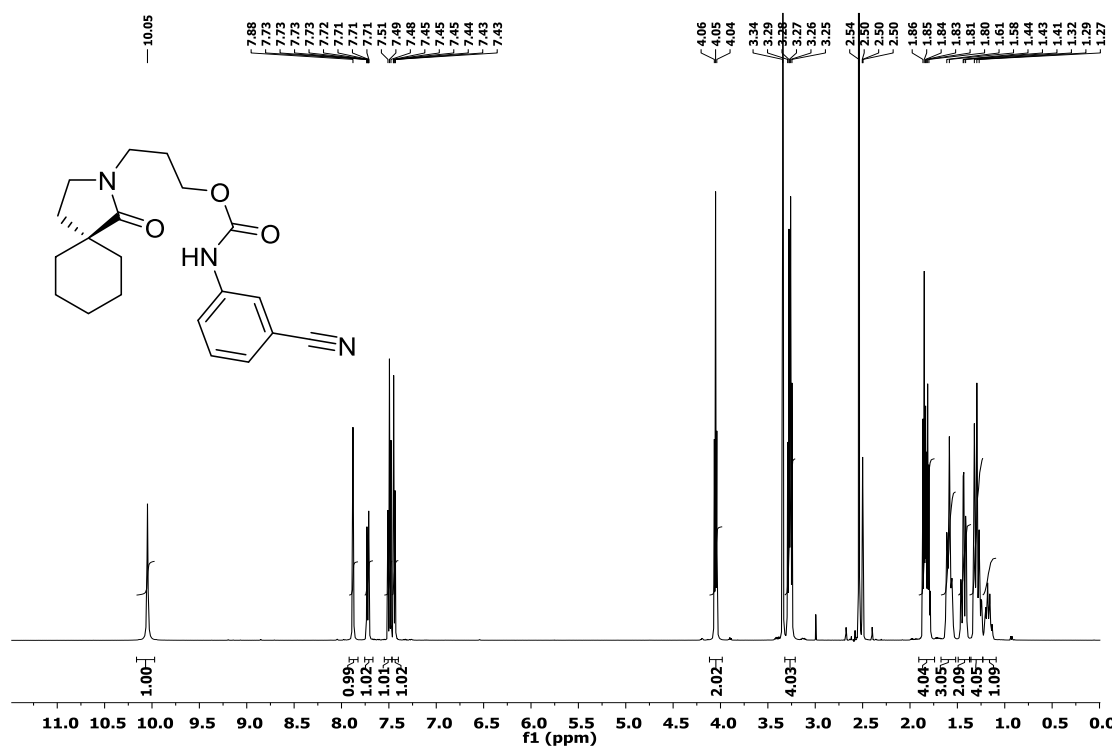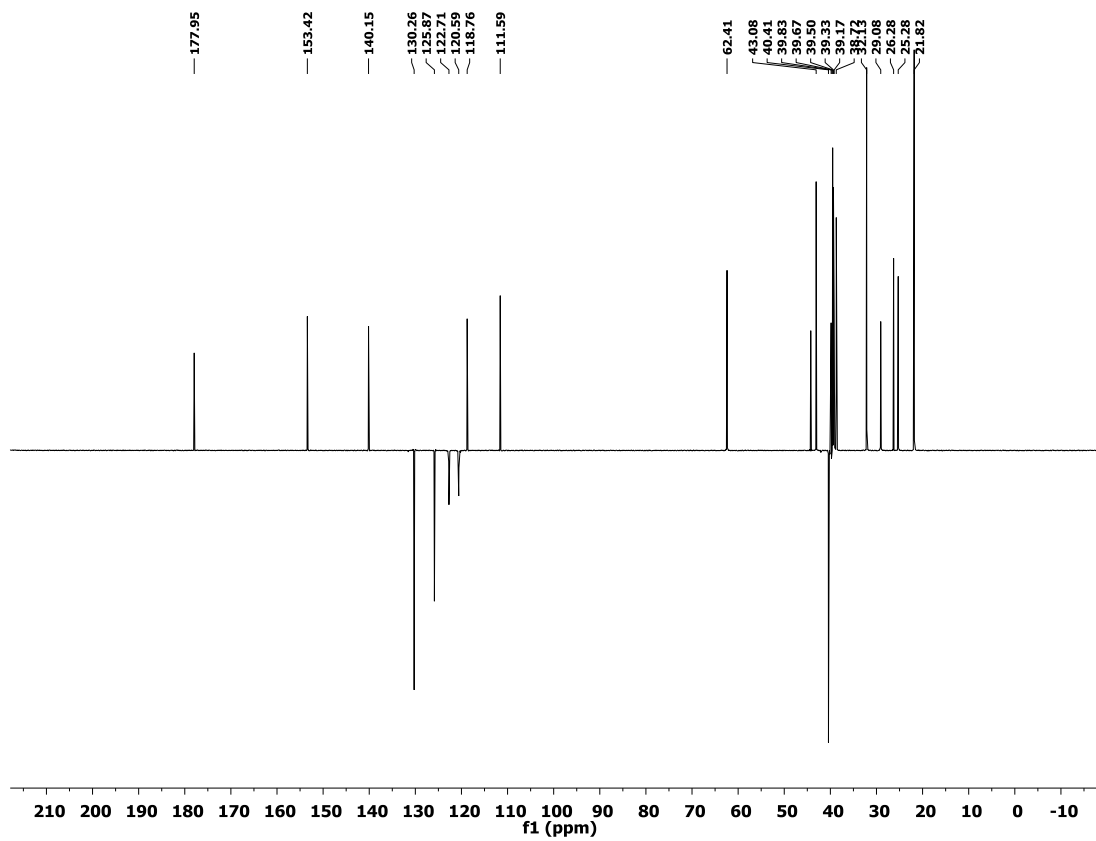

Sparteine-inspired series

S11

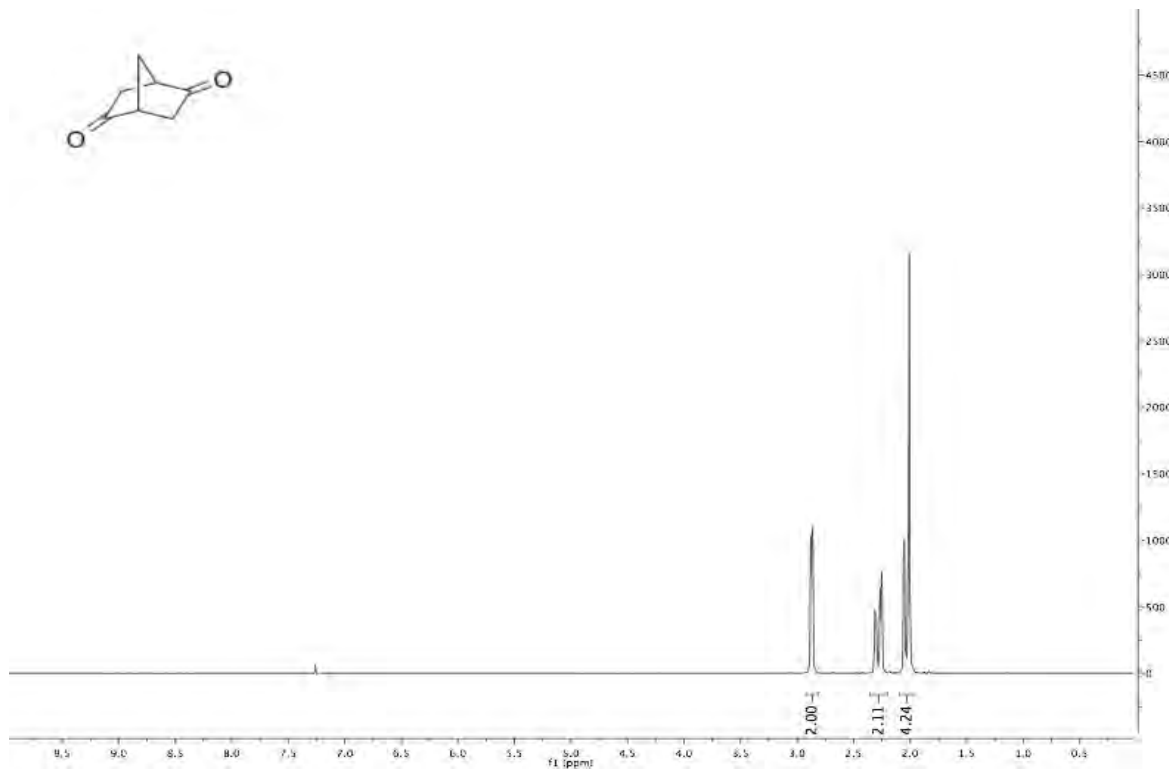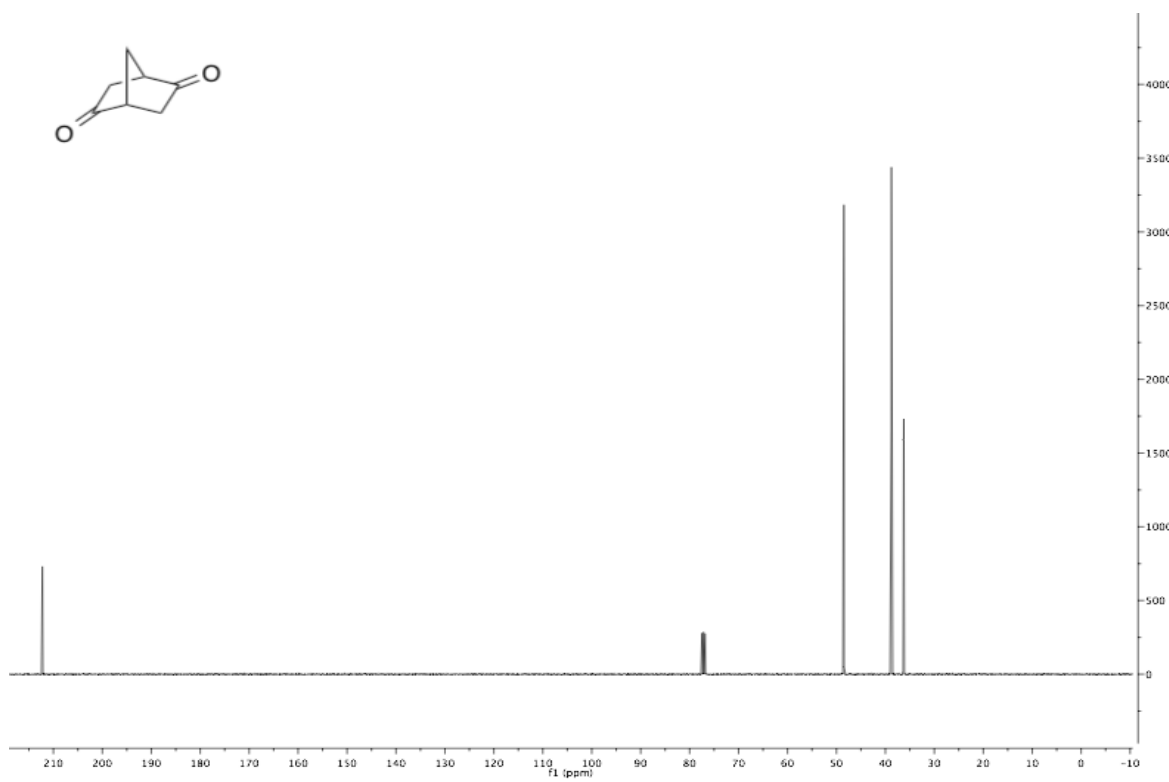

12

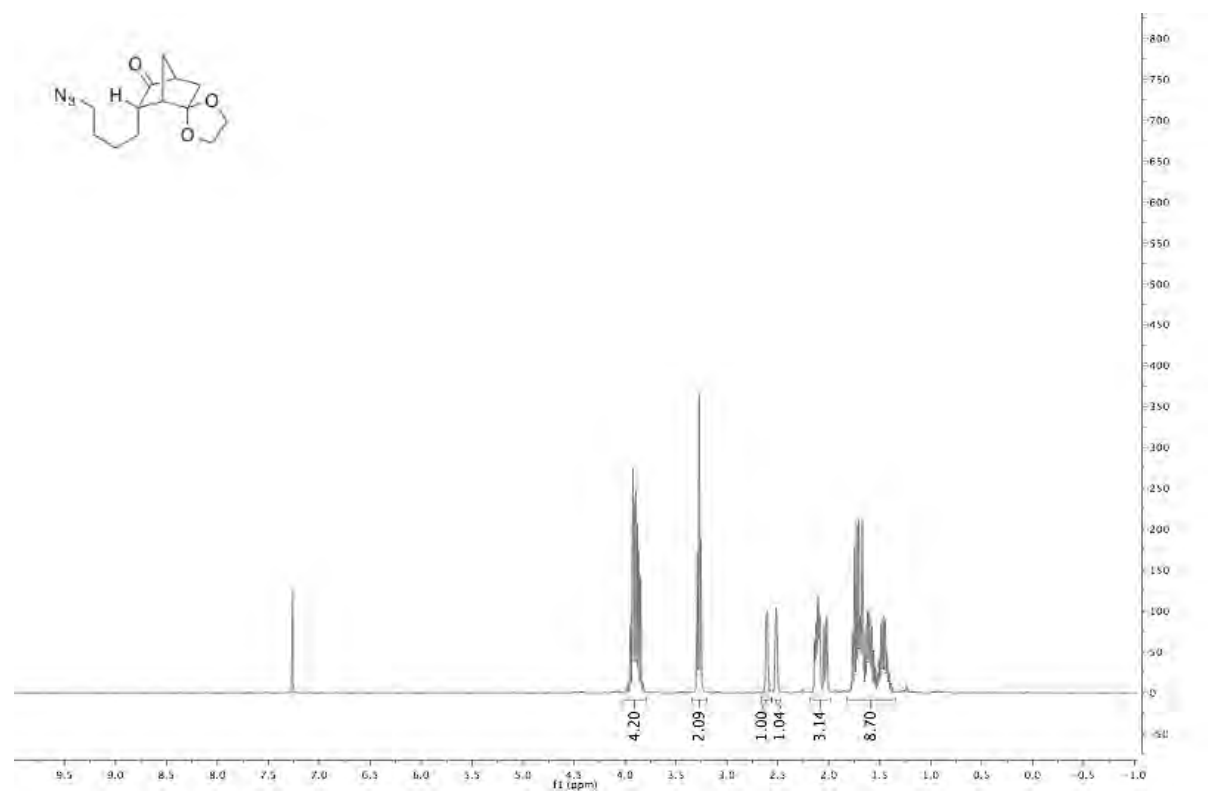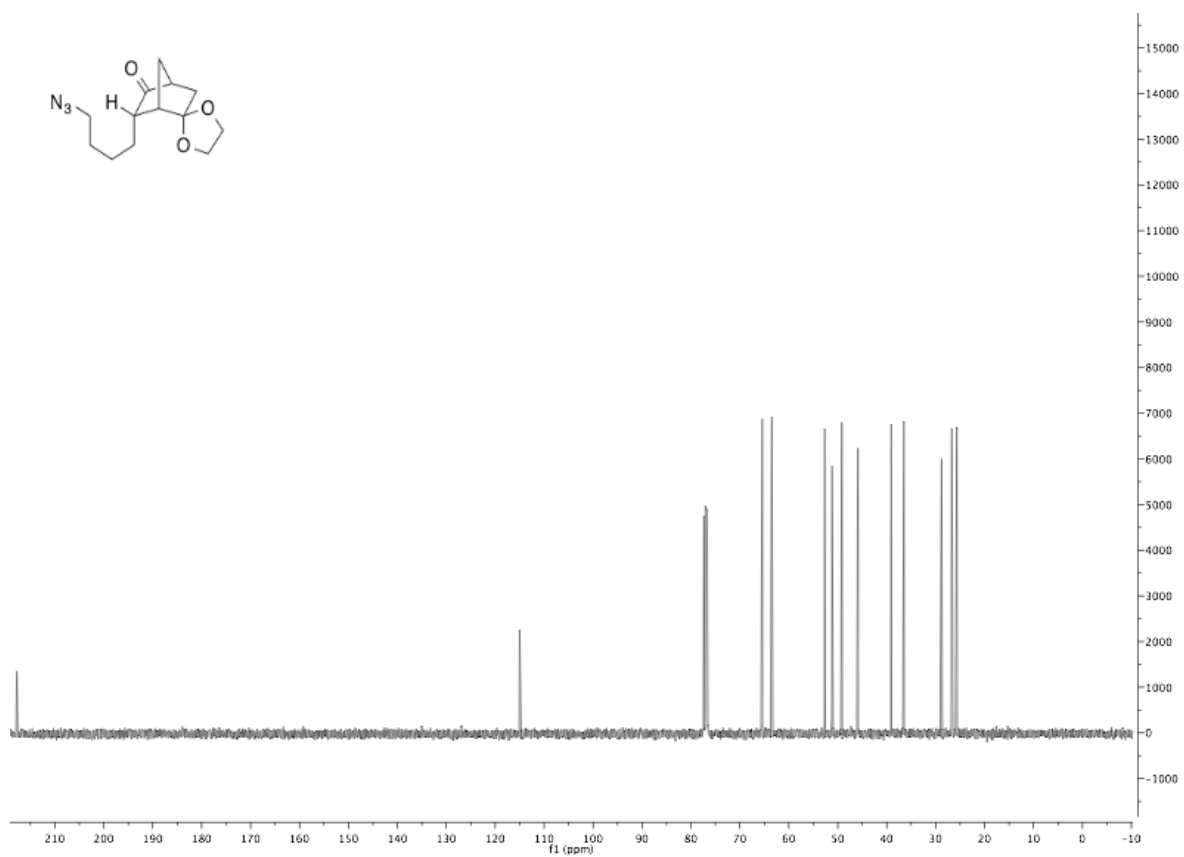

13

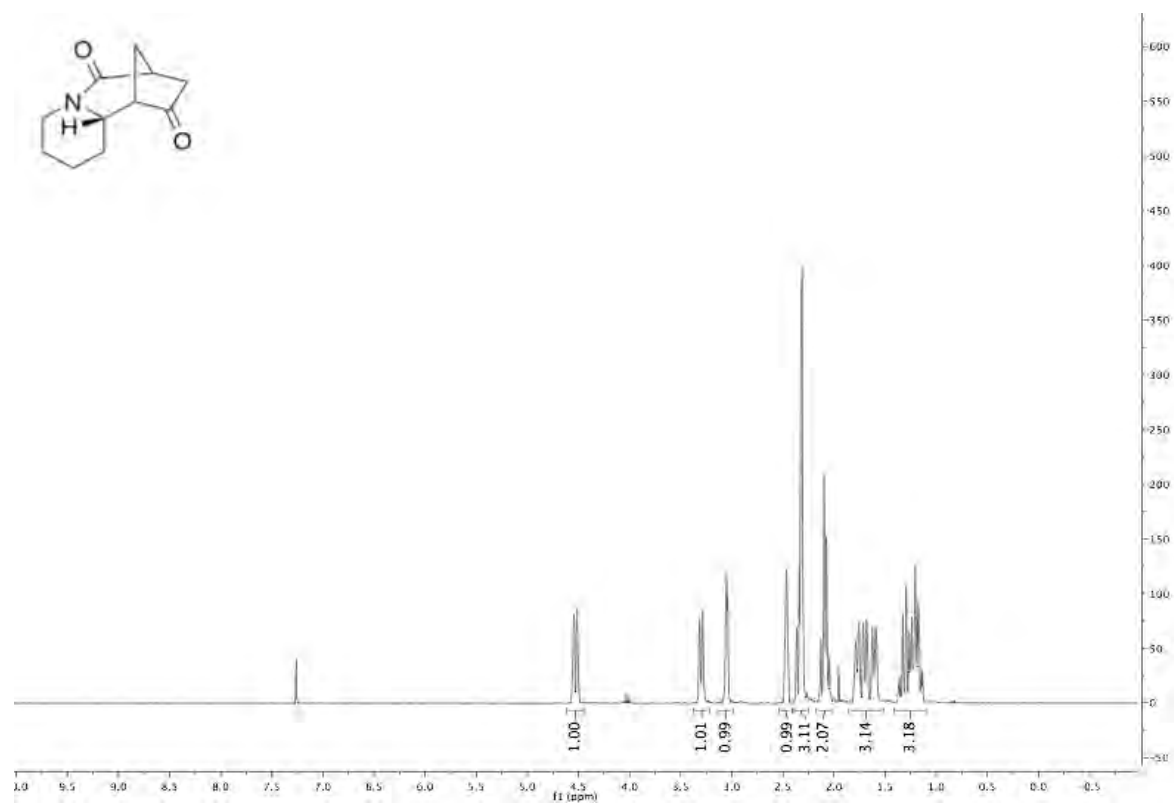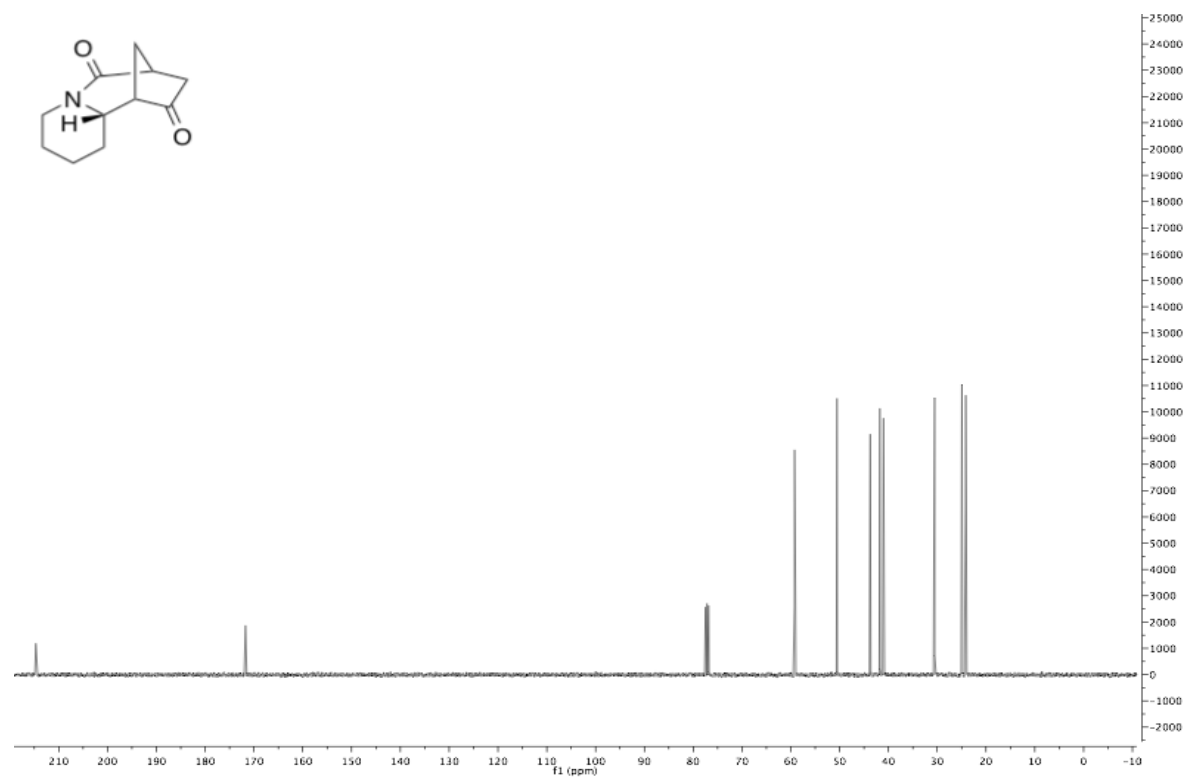

S13

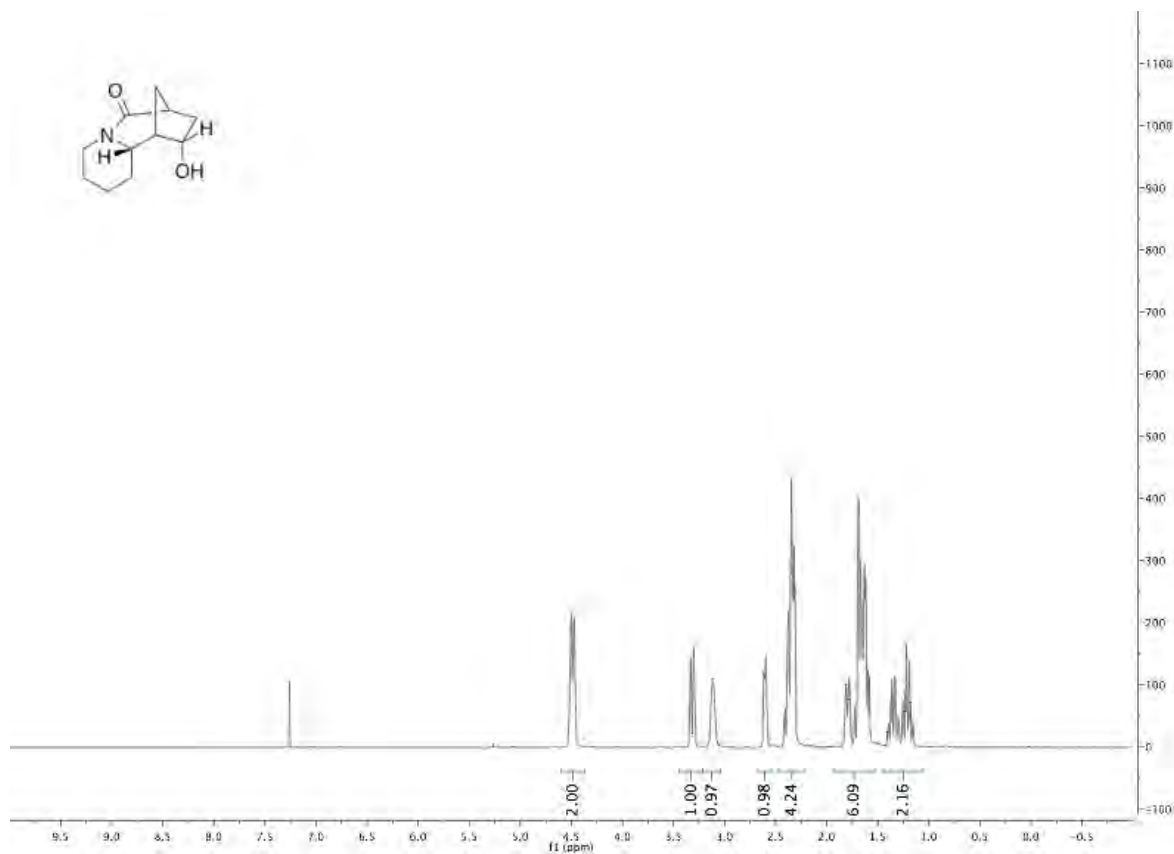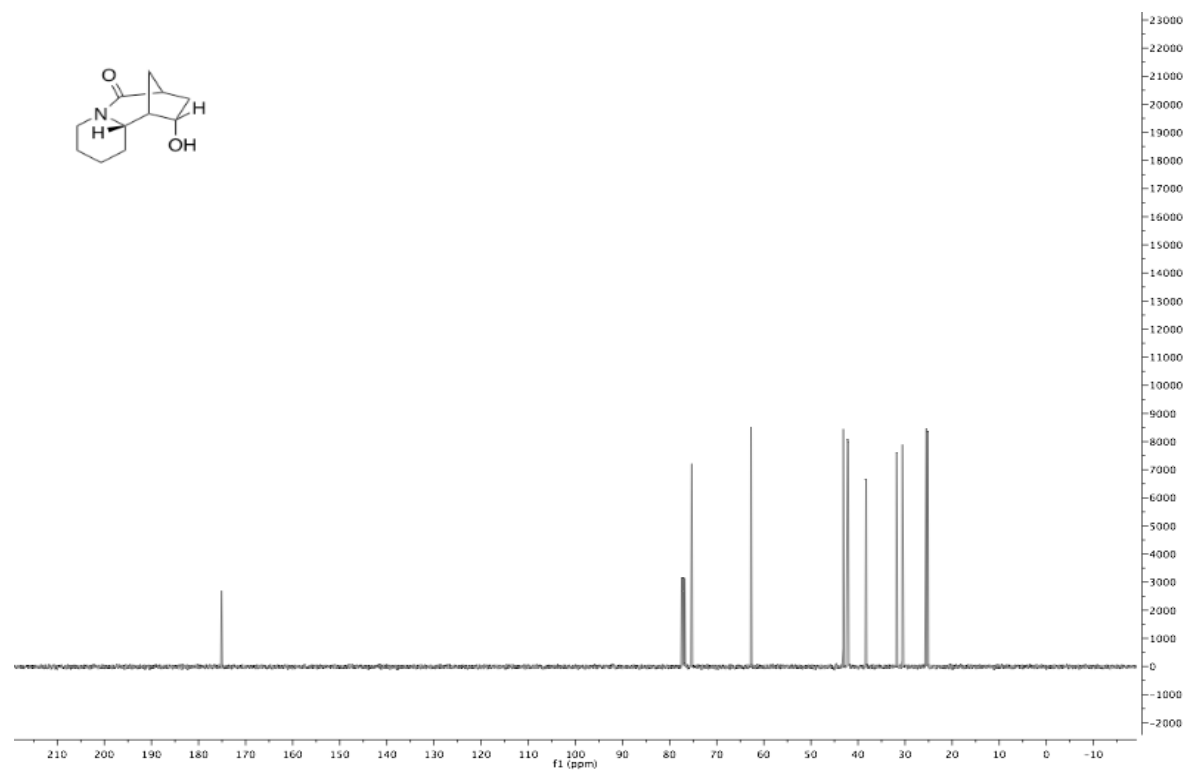

S200



S14

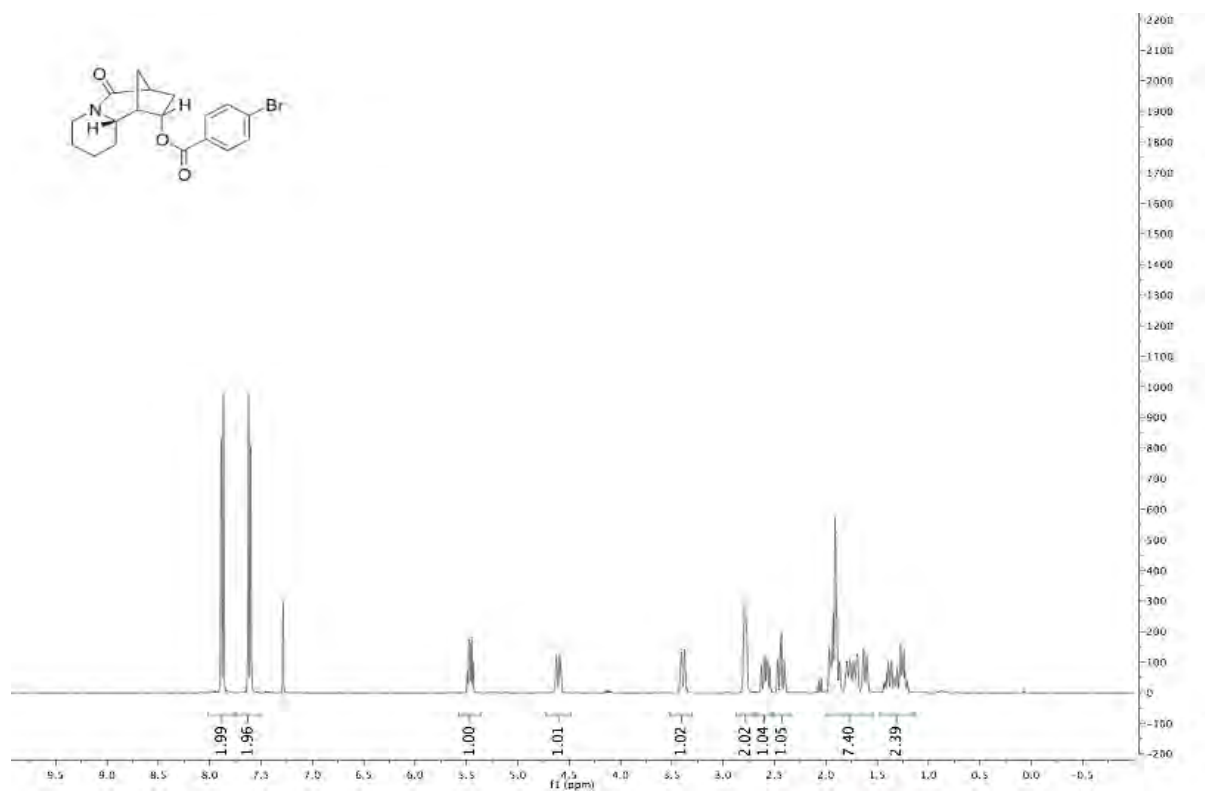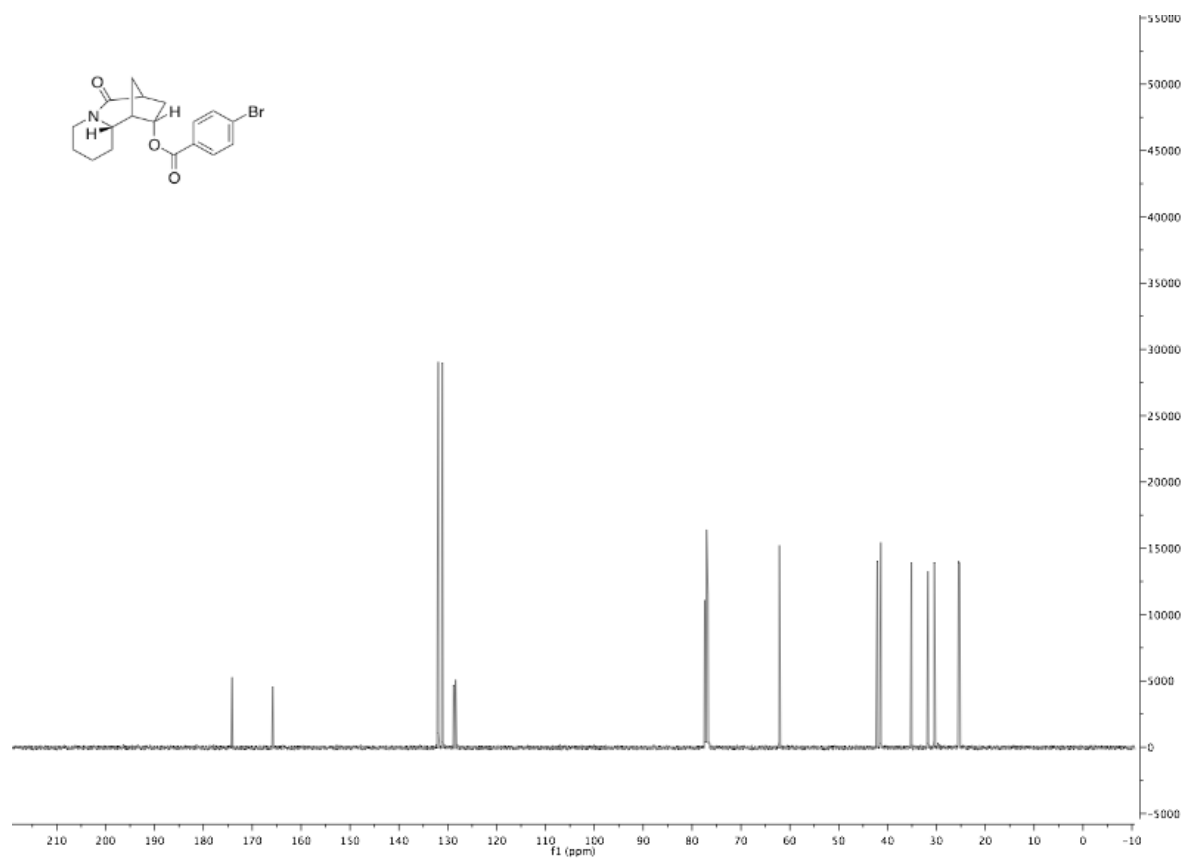

S201

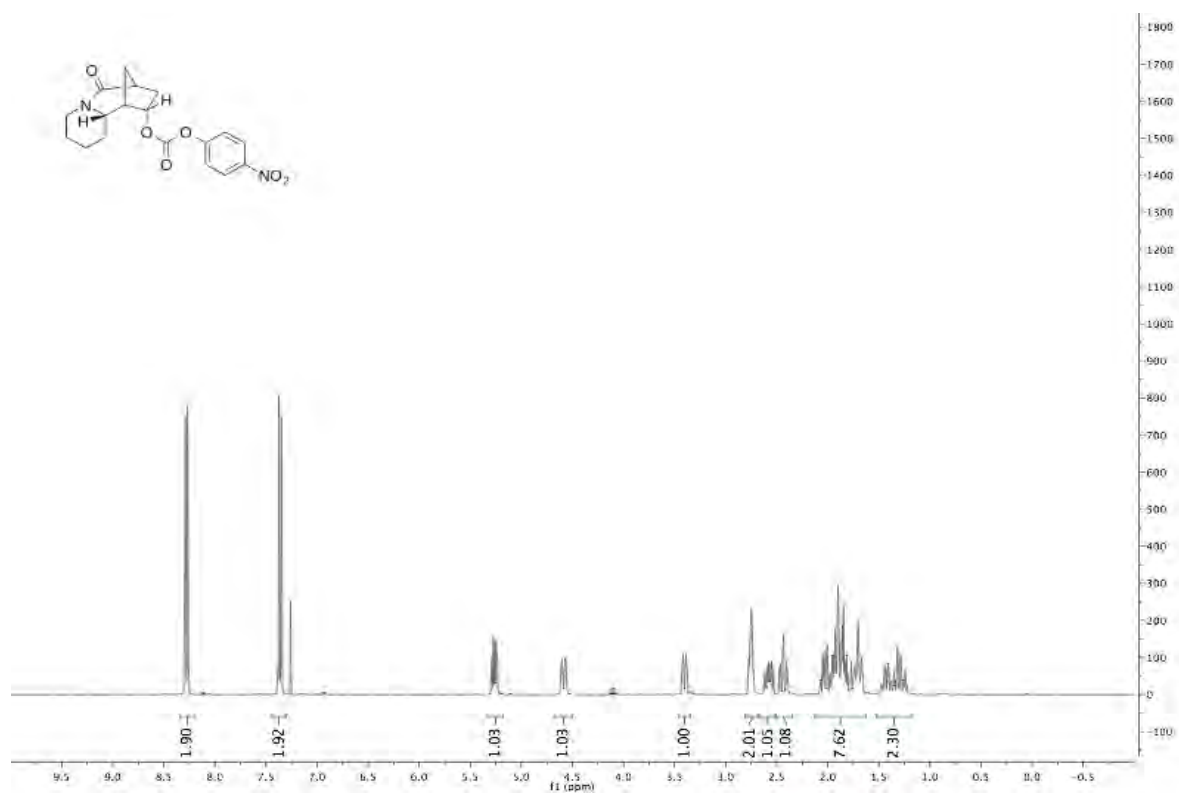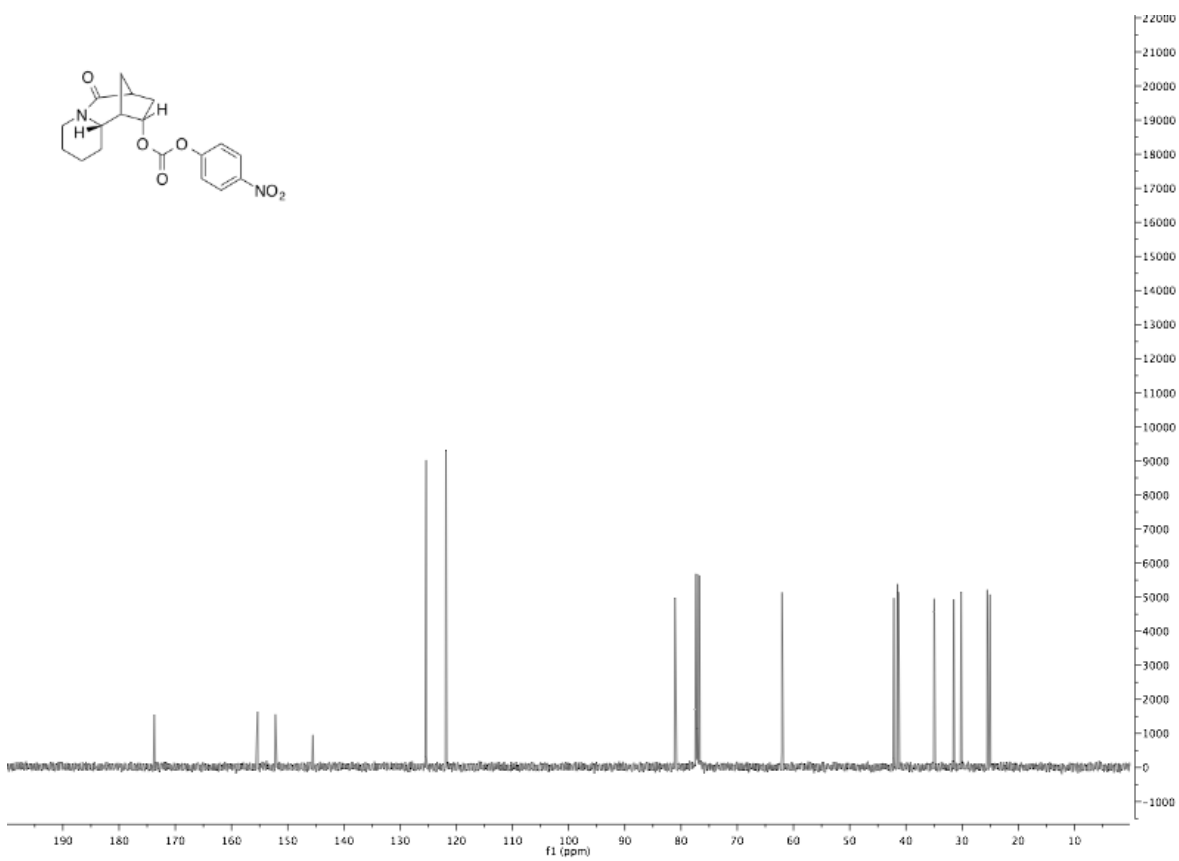

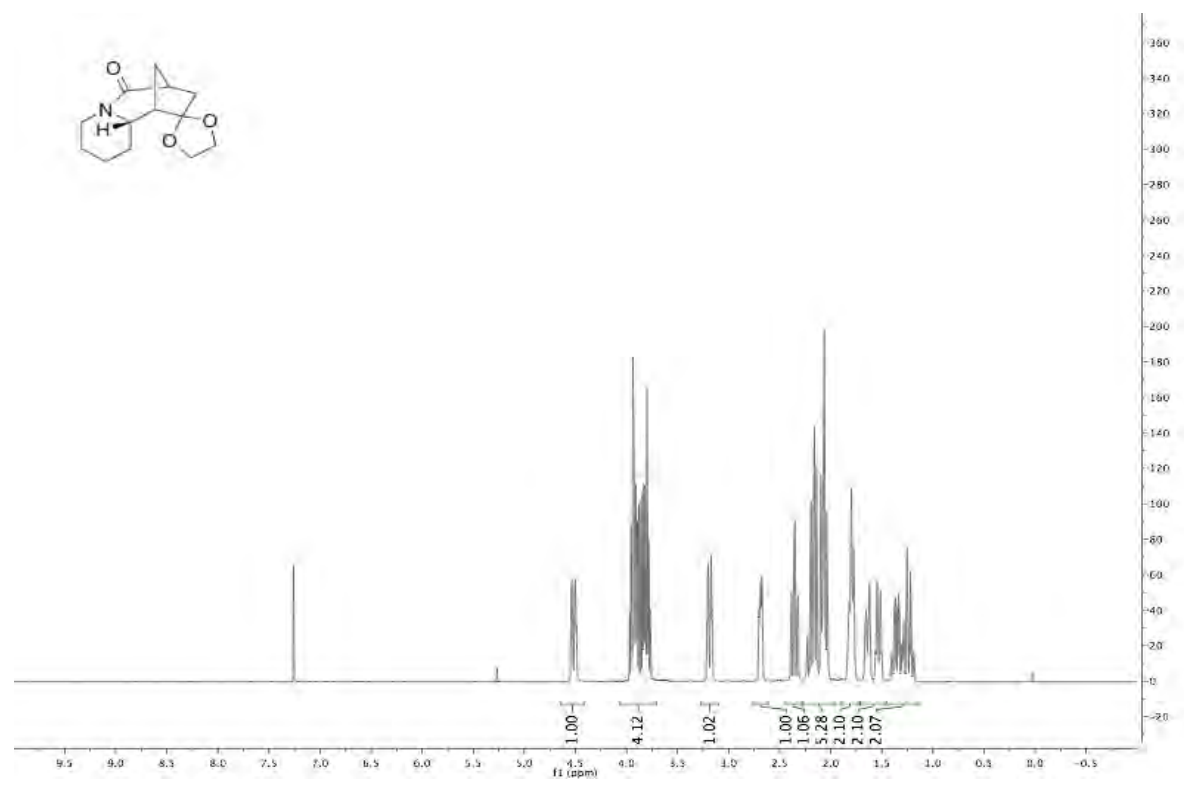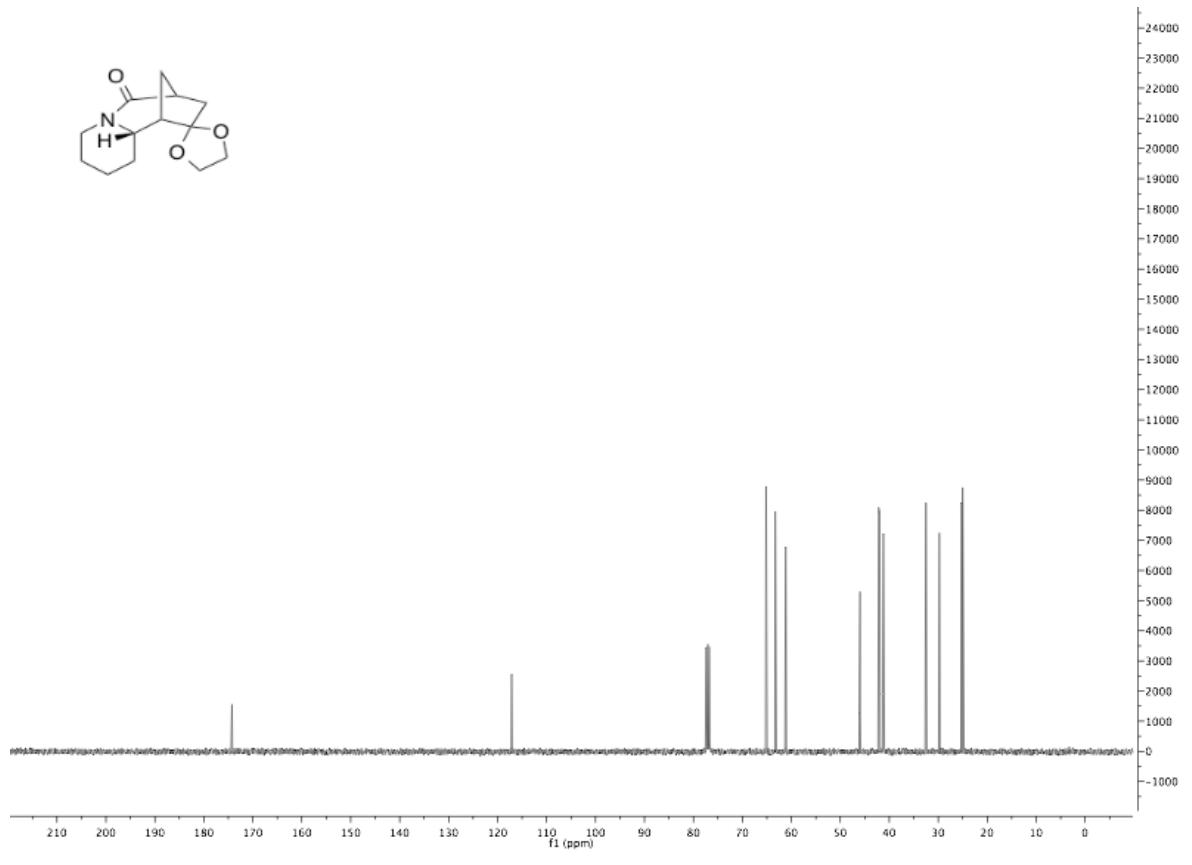

41

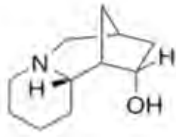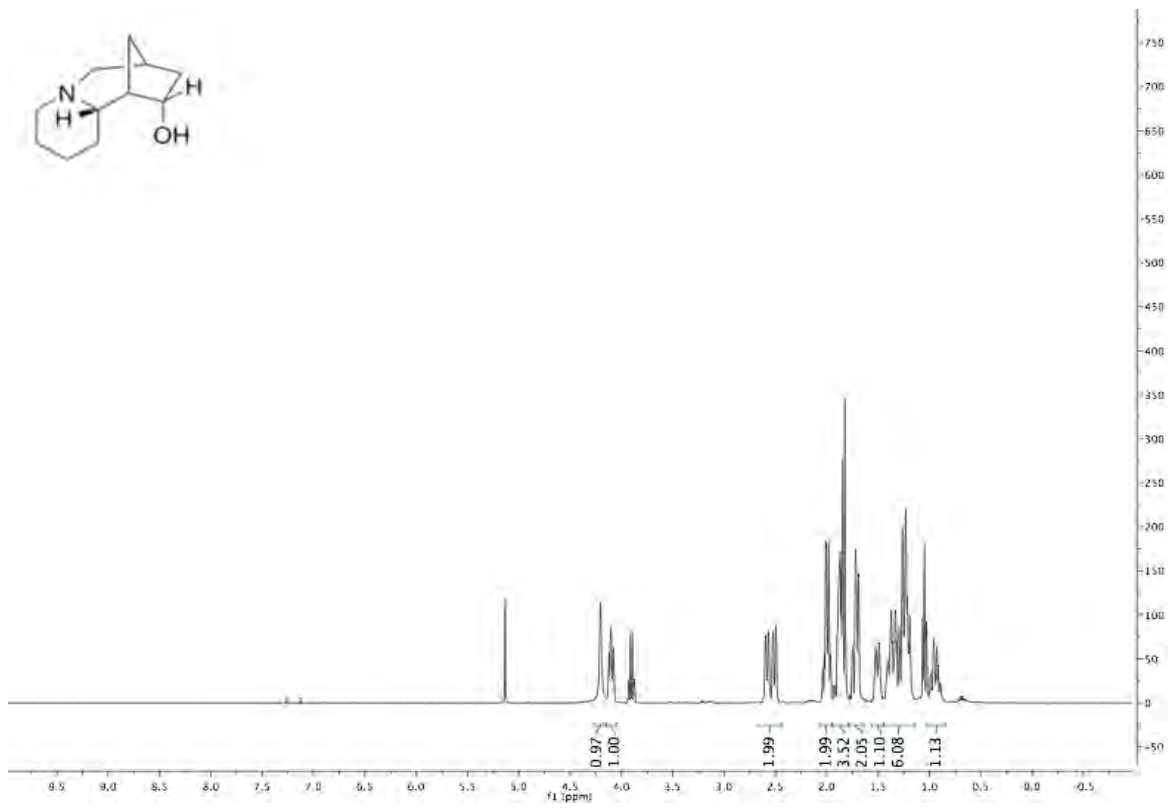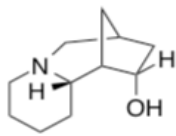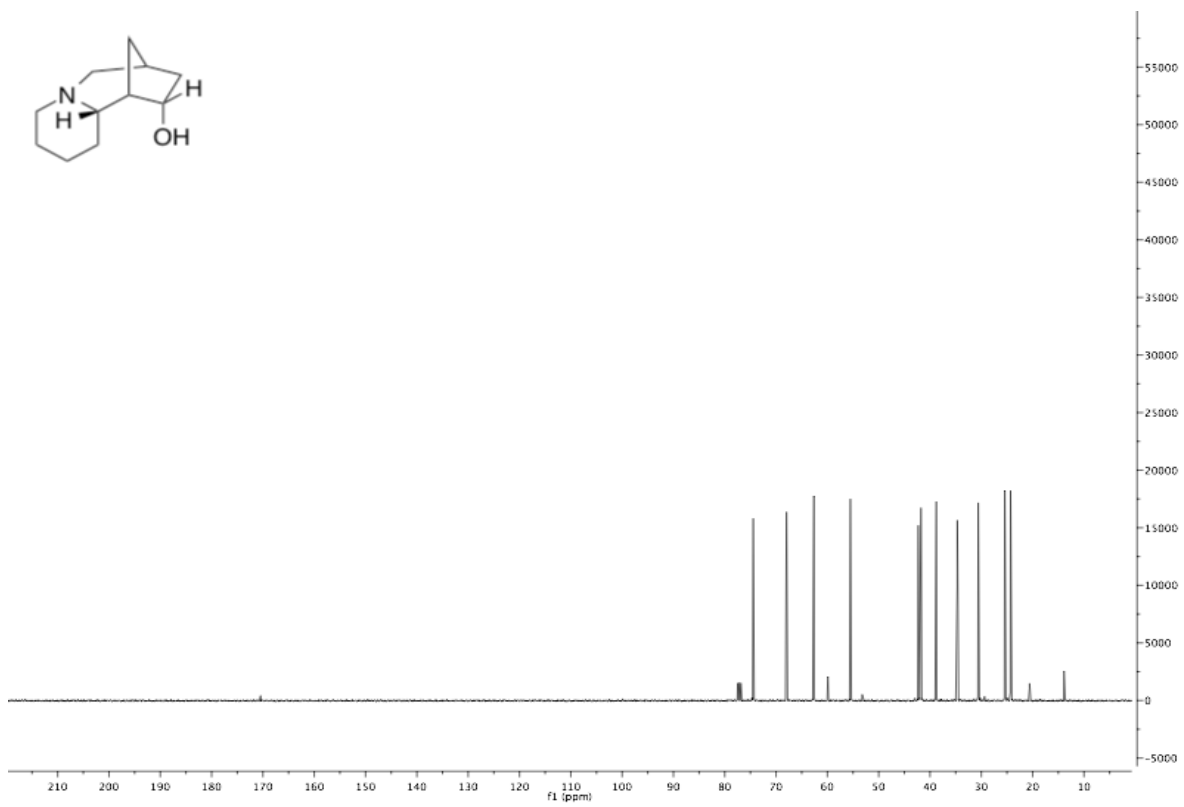

15a

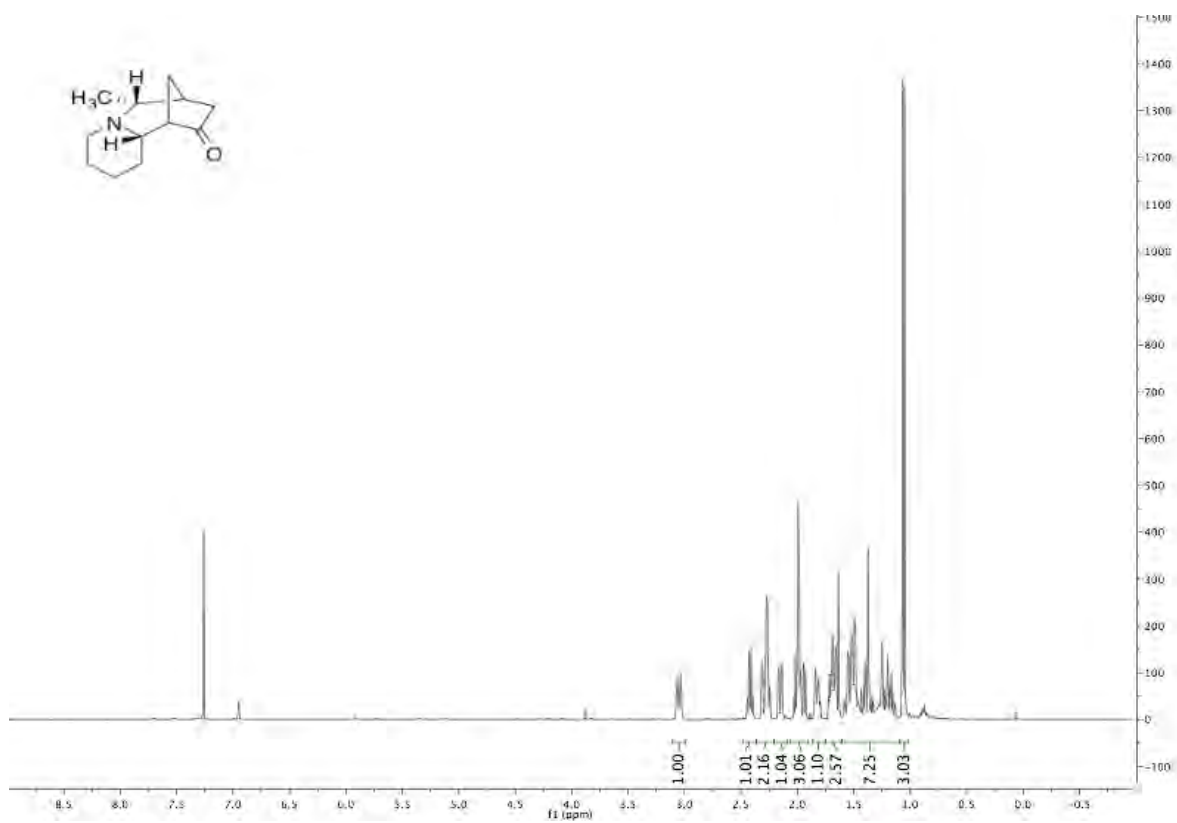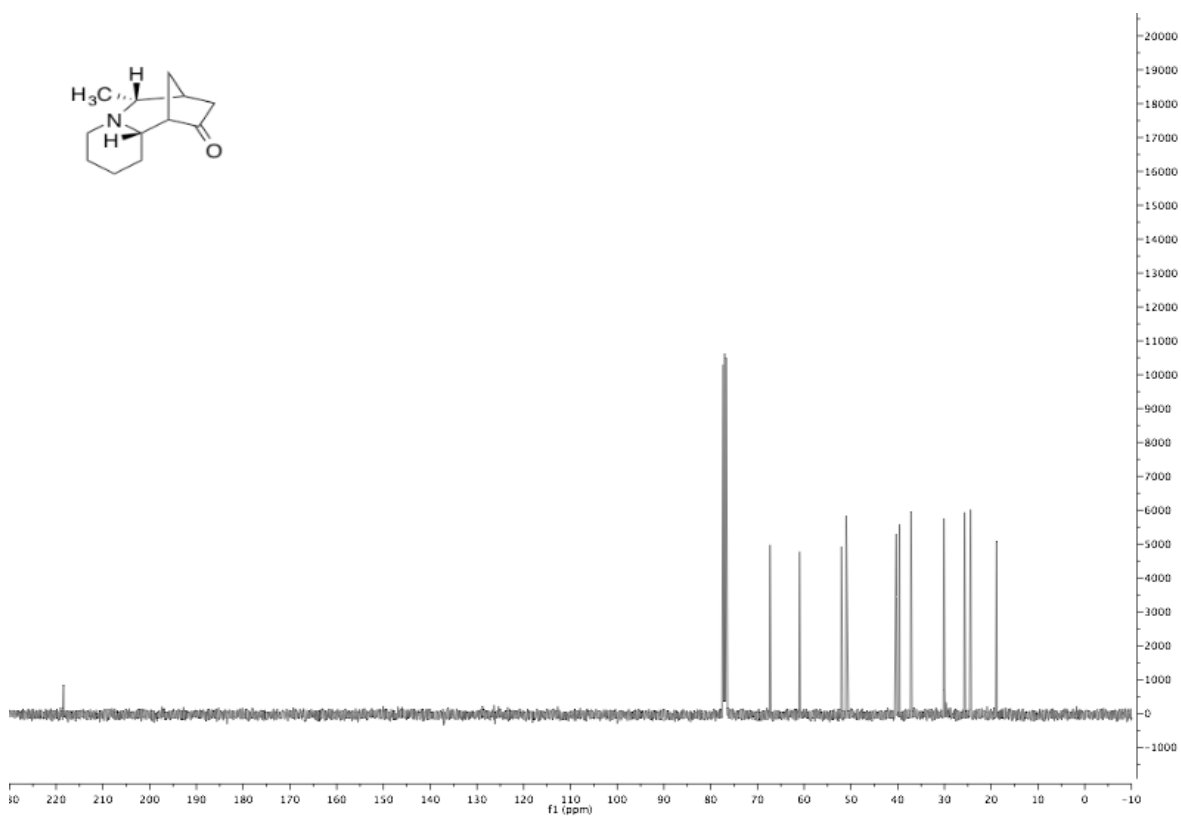

15b

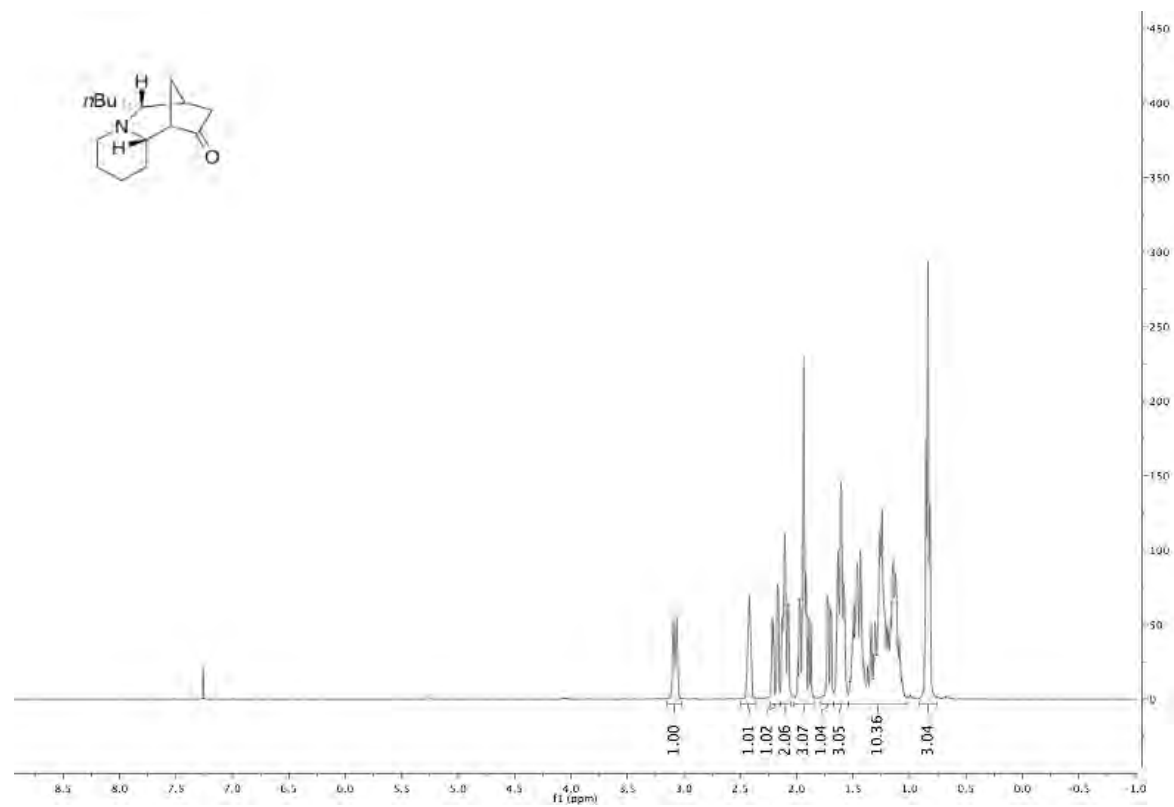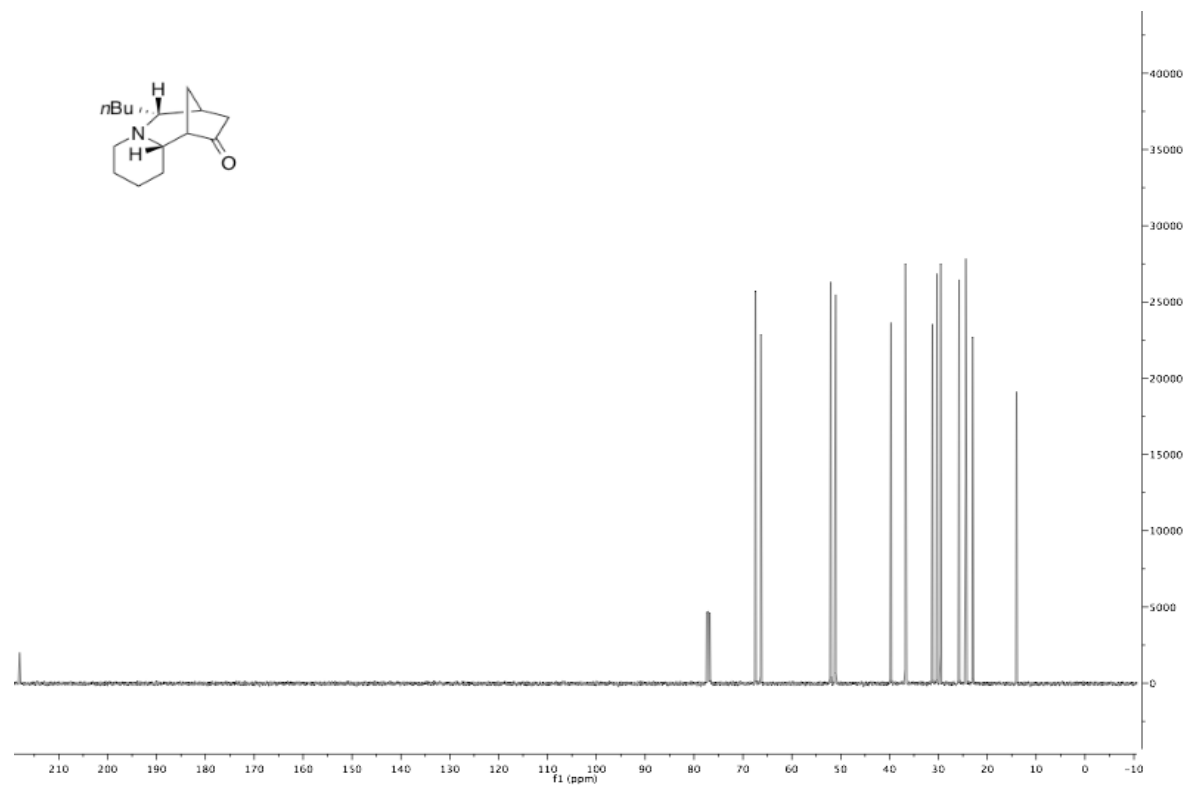

15c

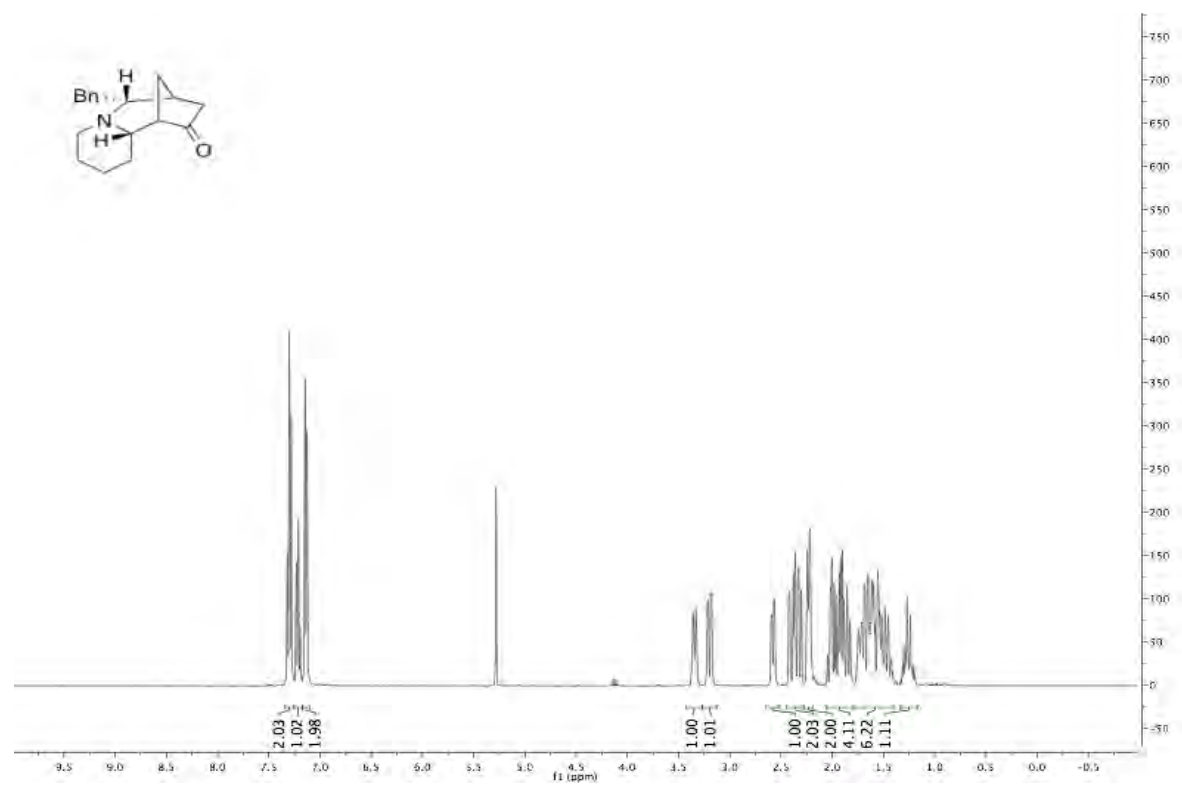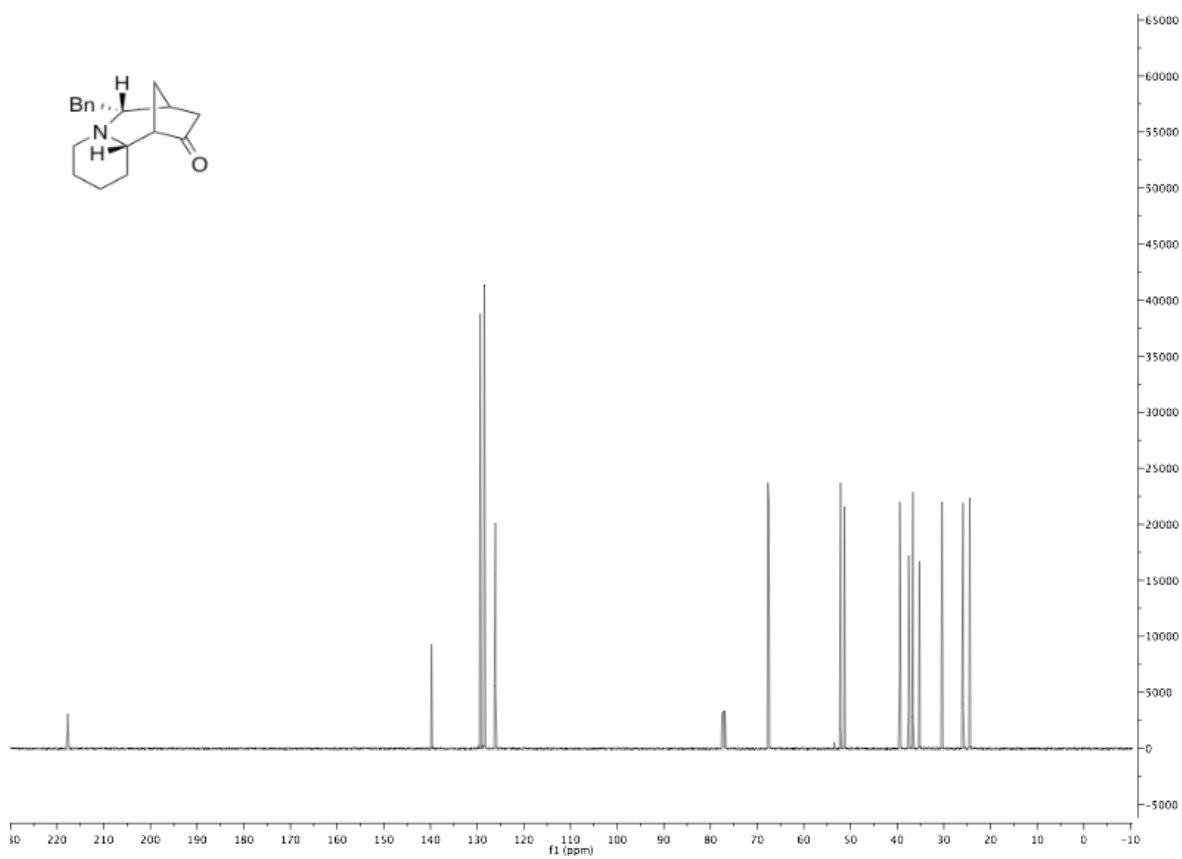

16a

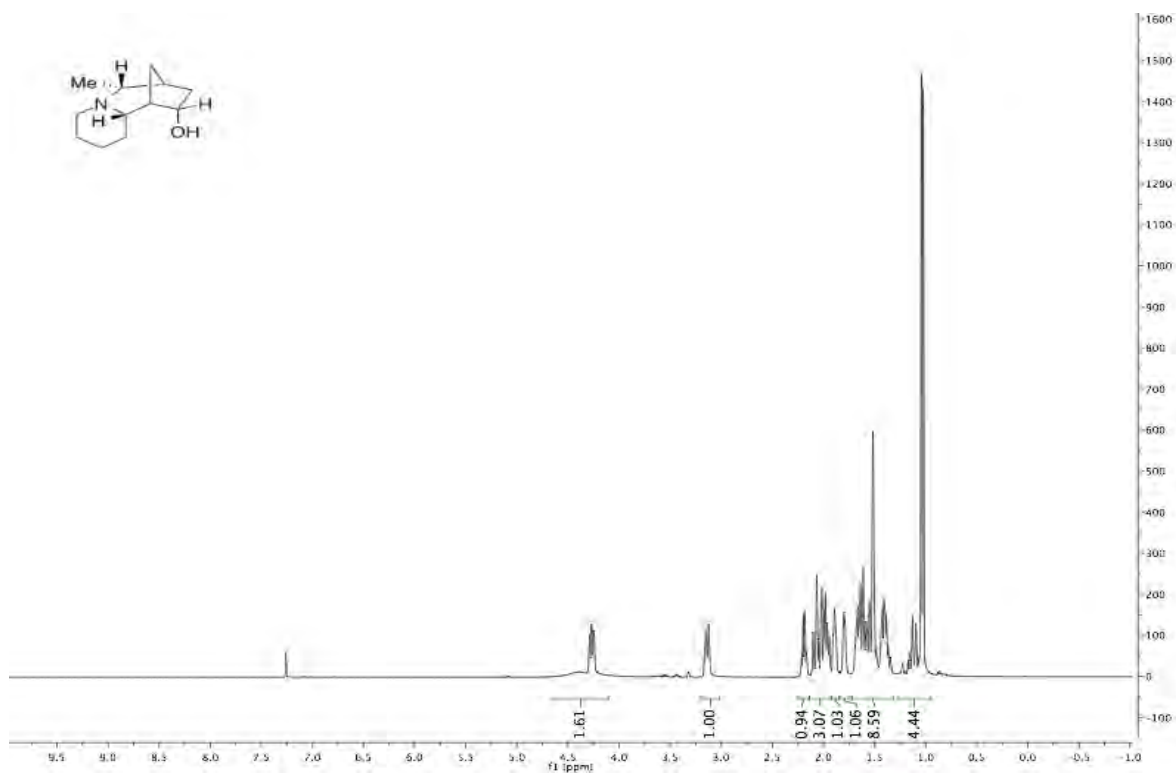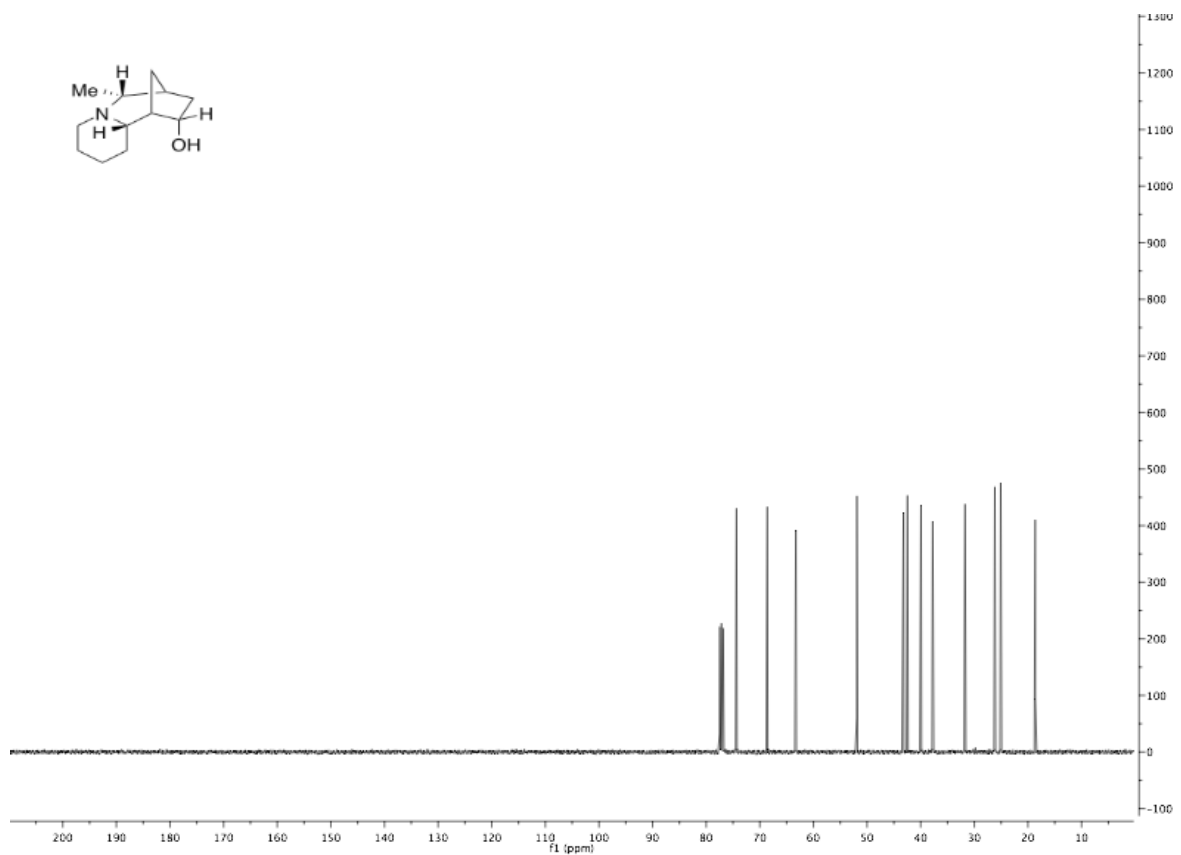



16b

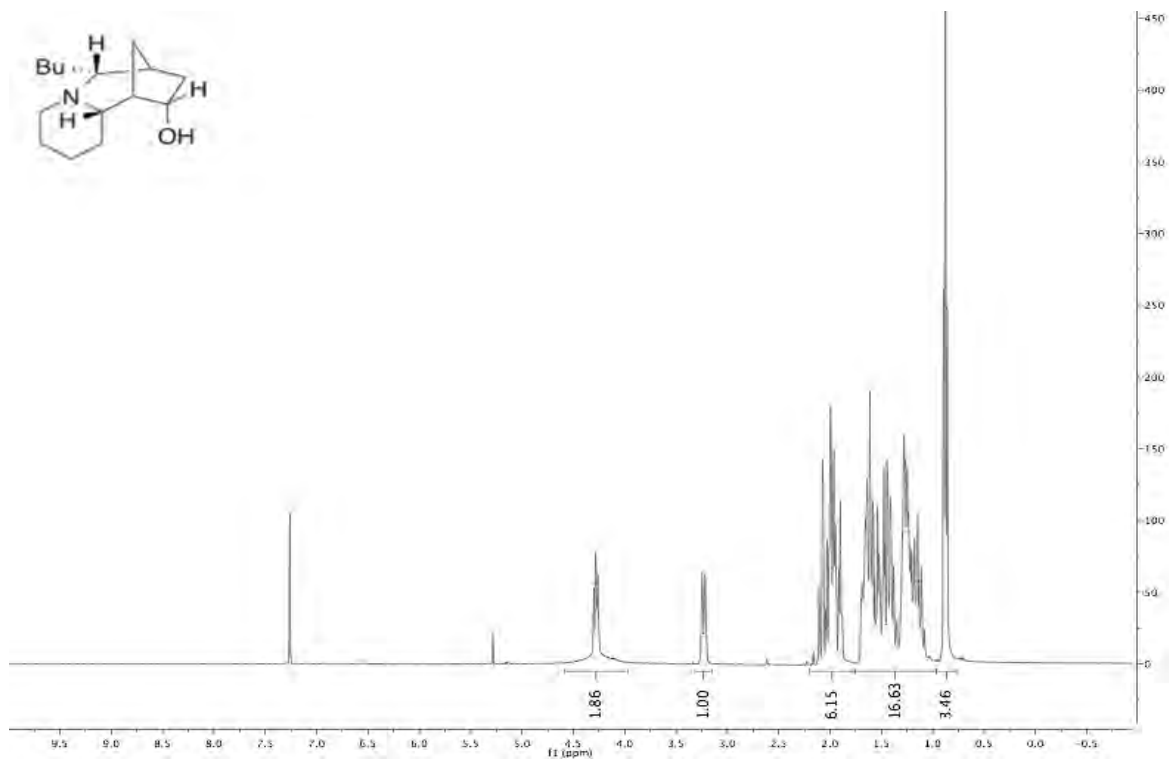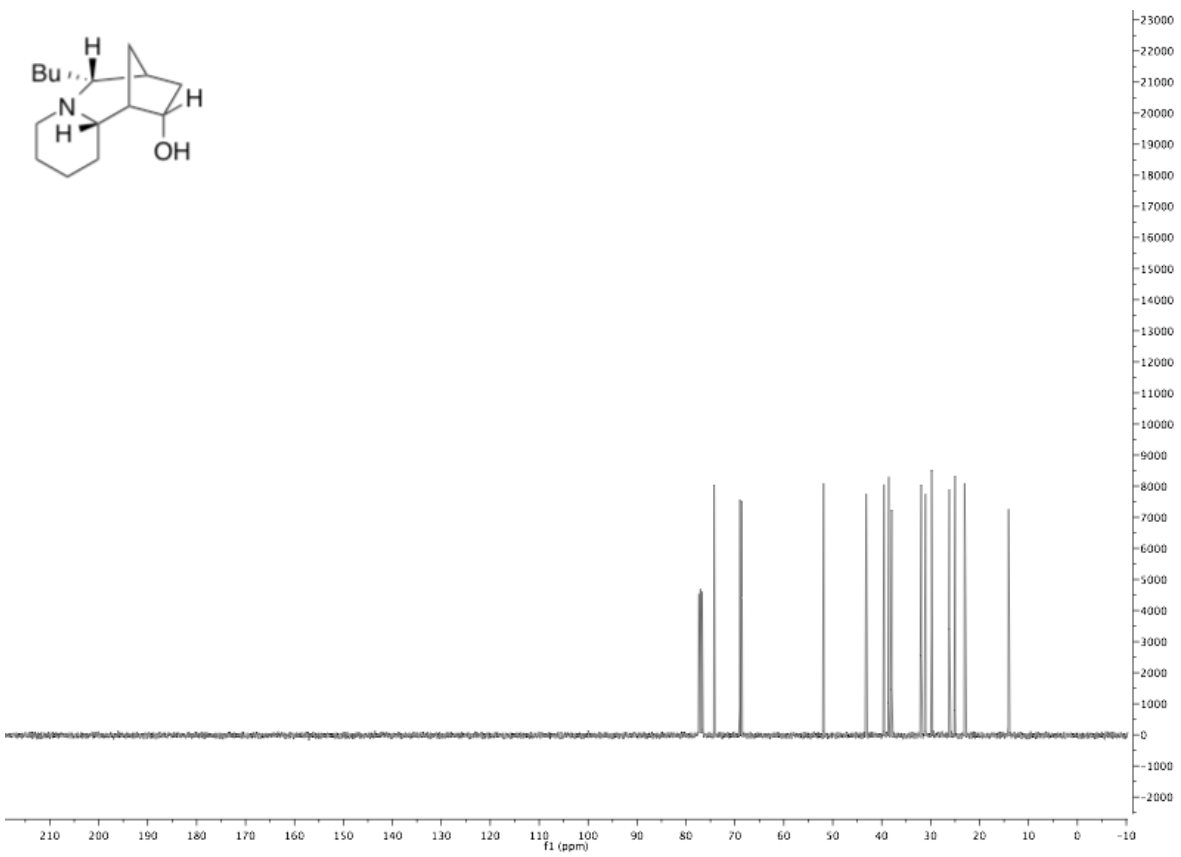

16c

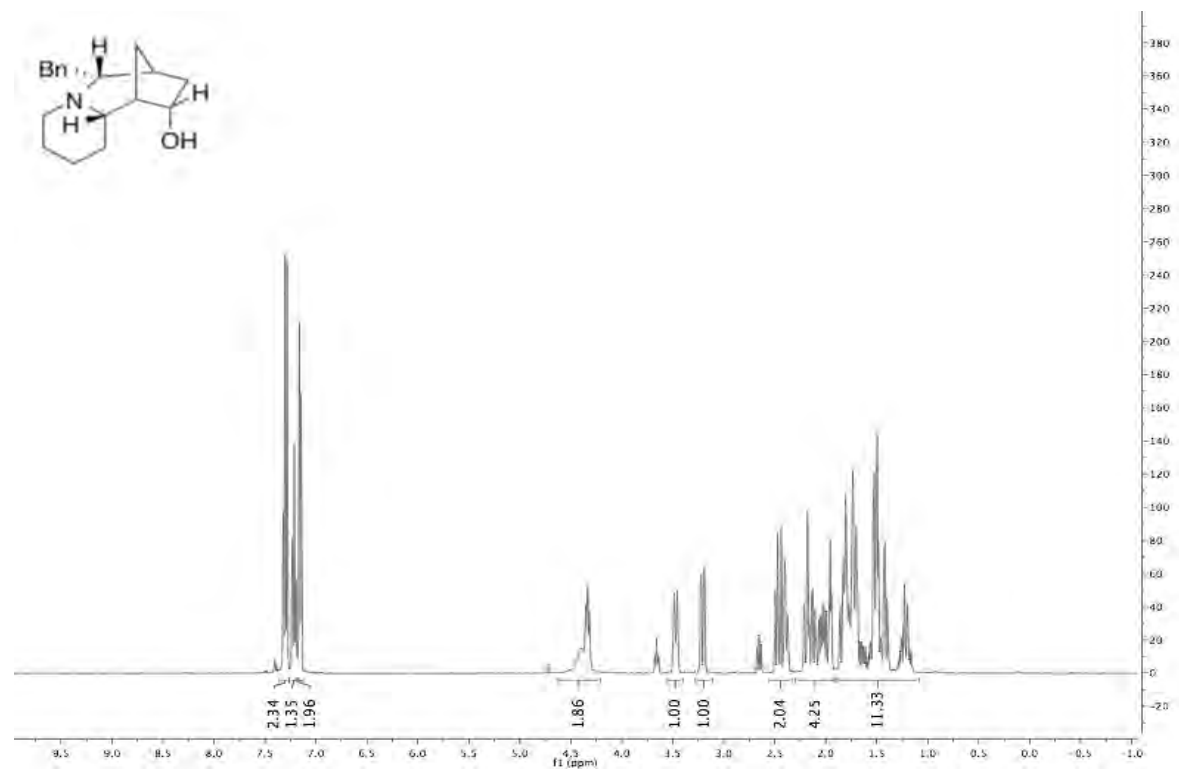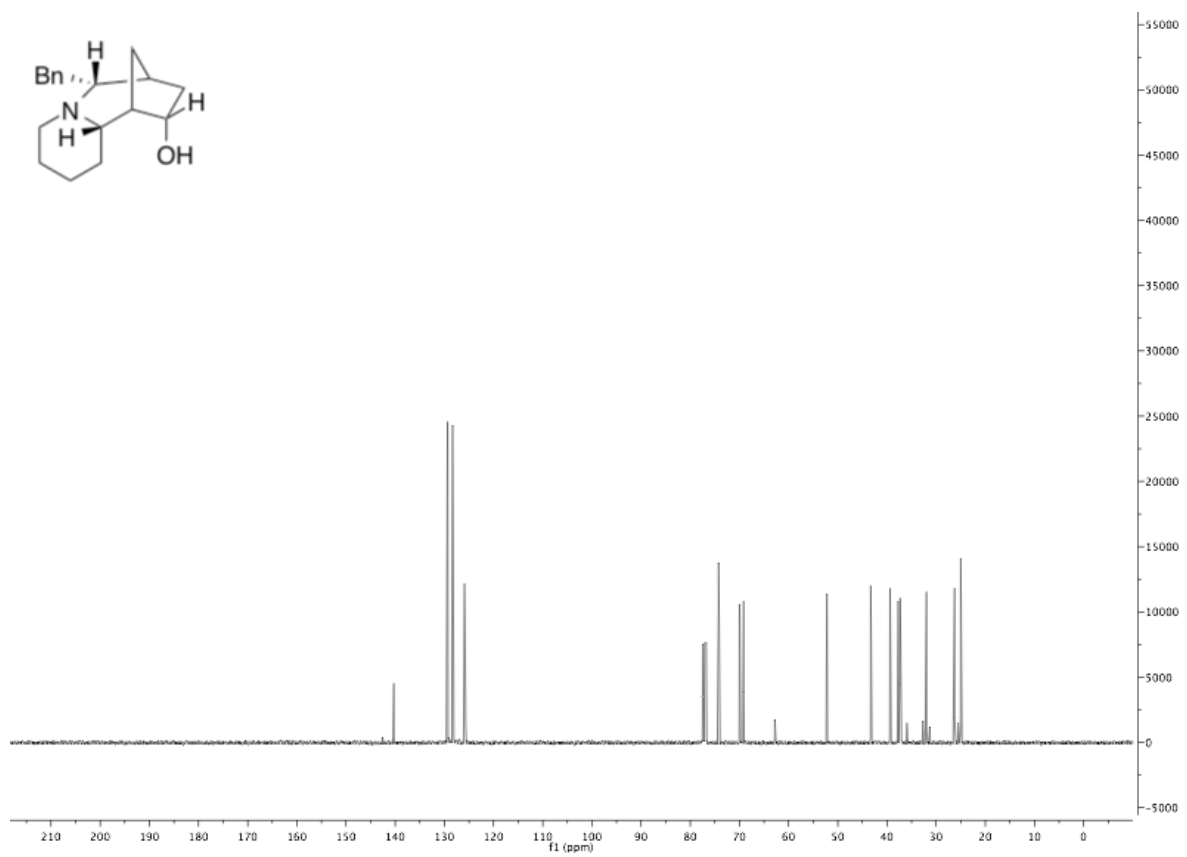

40{1}

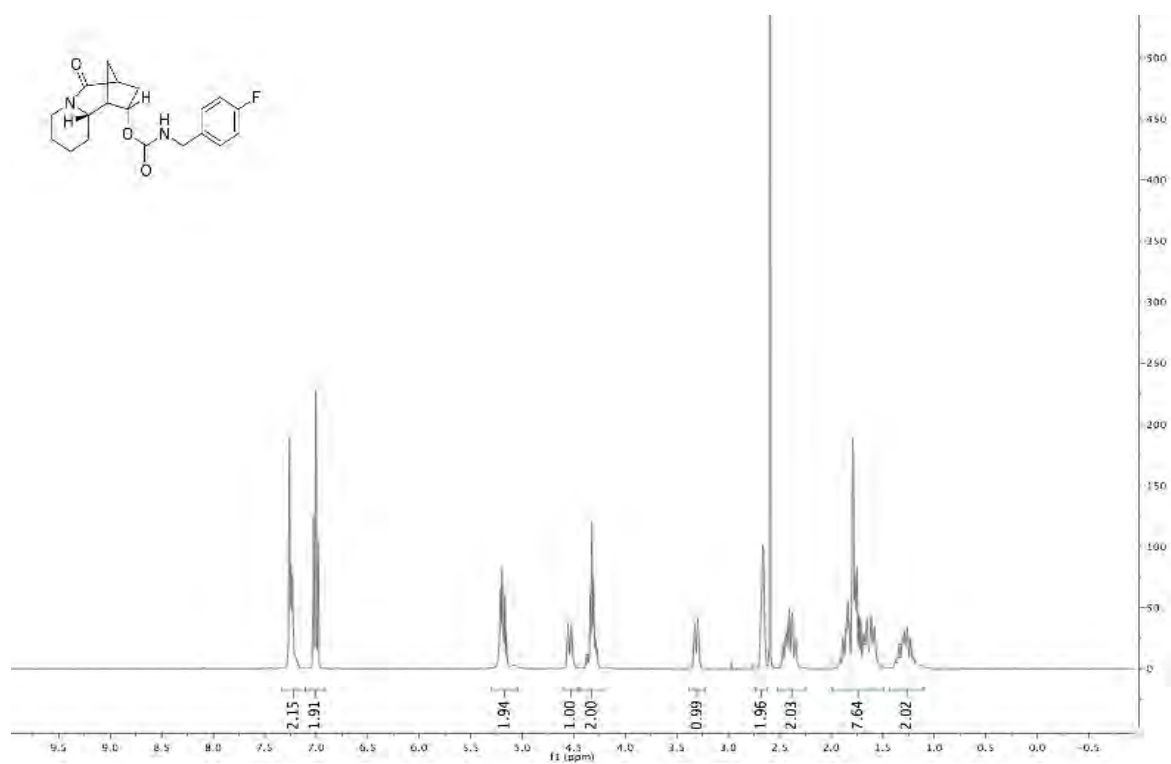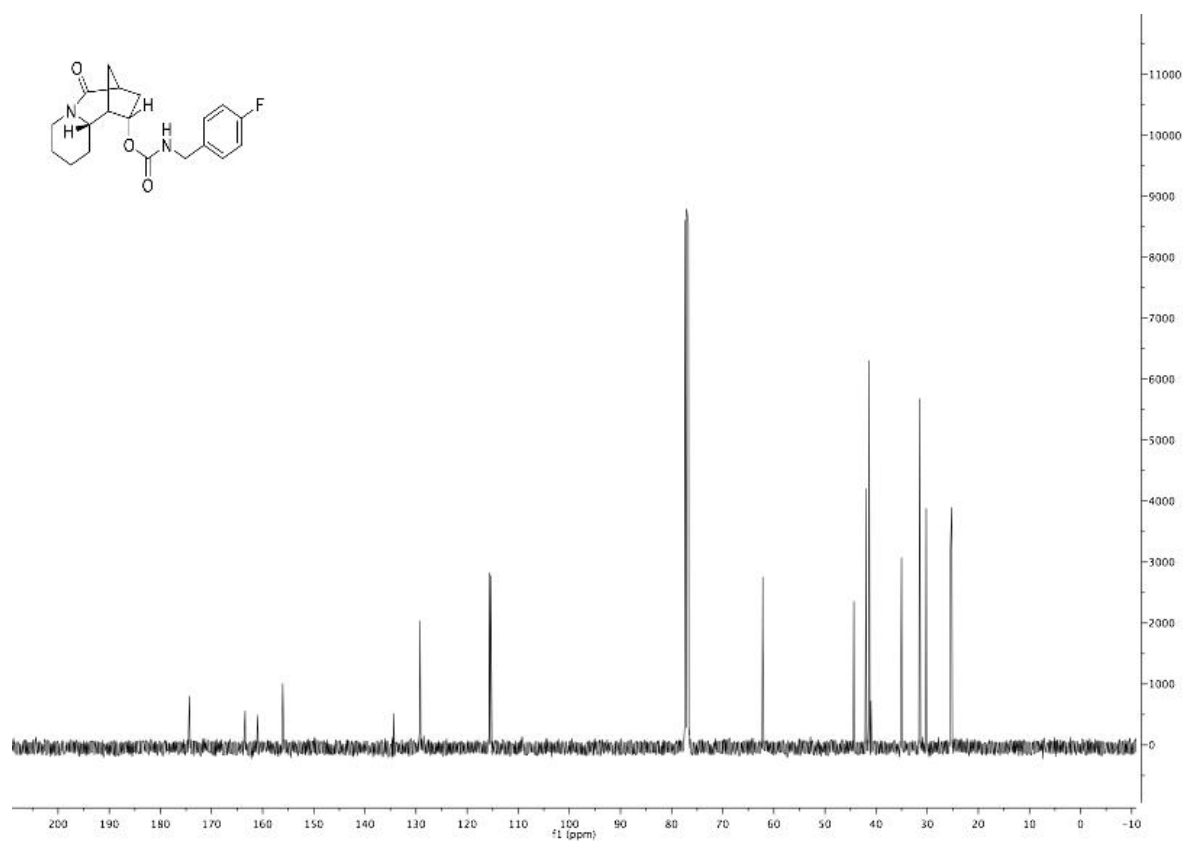

40{2}

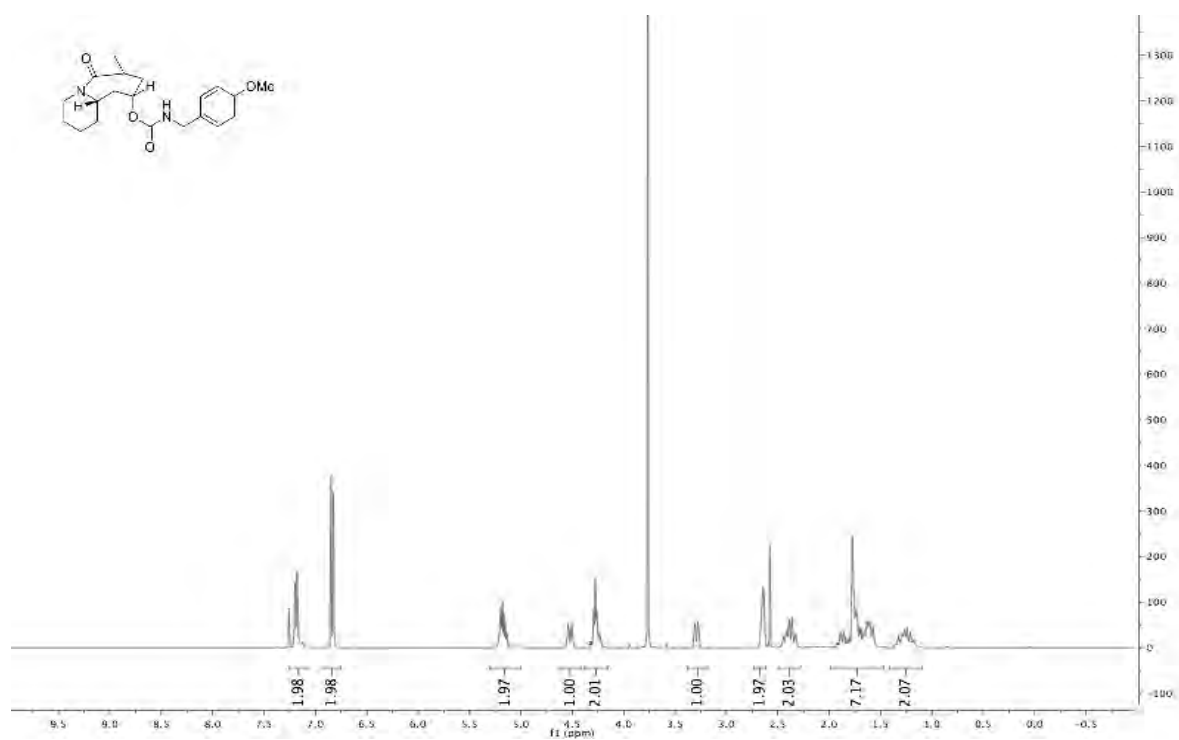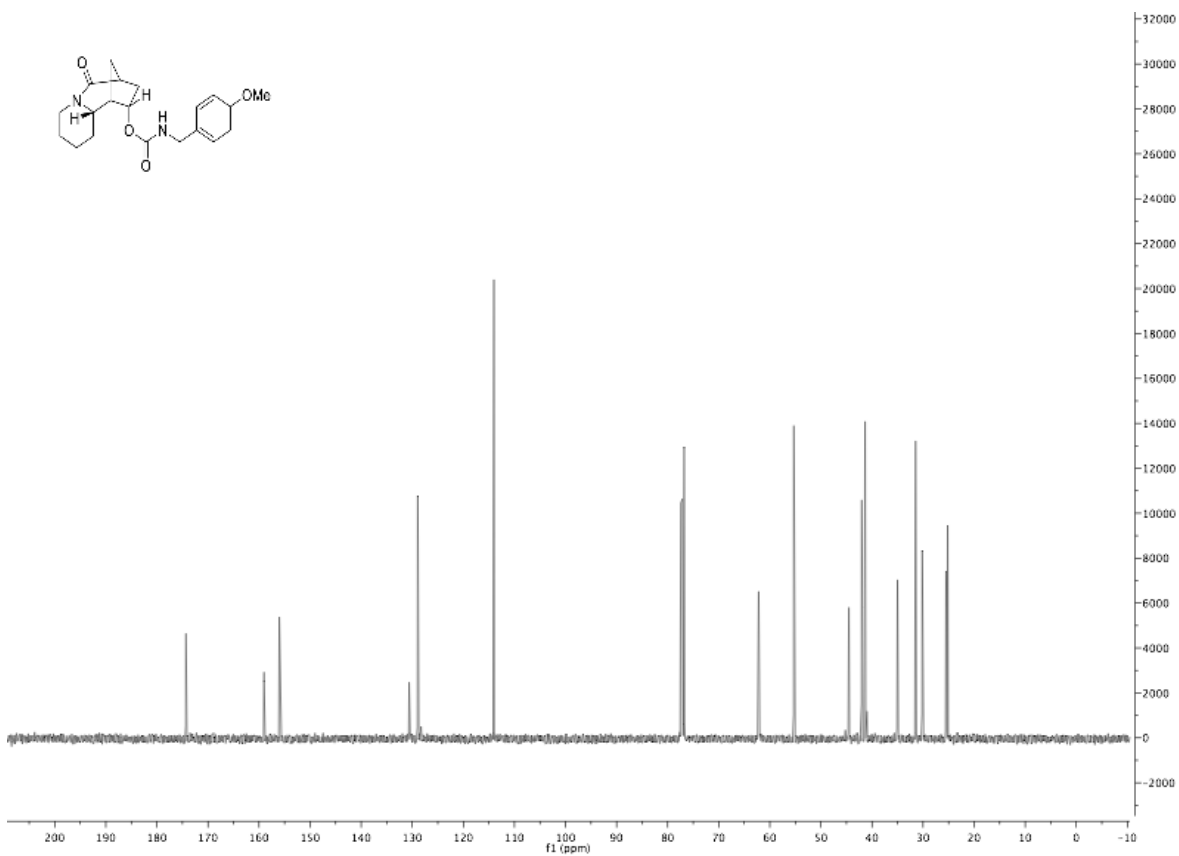

40{3}

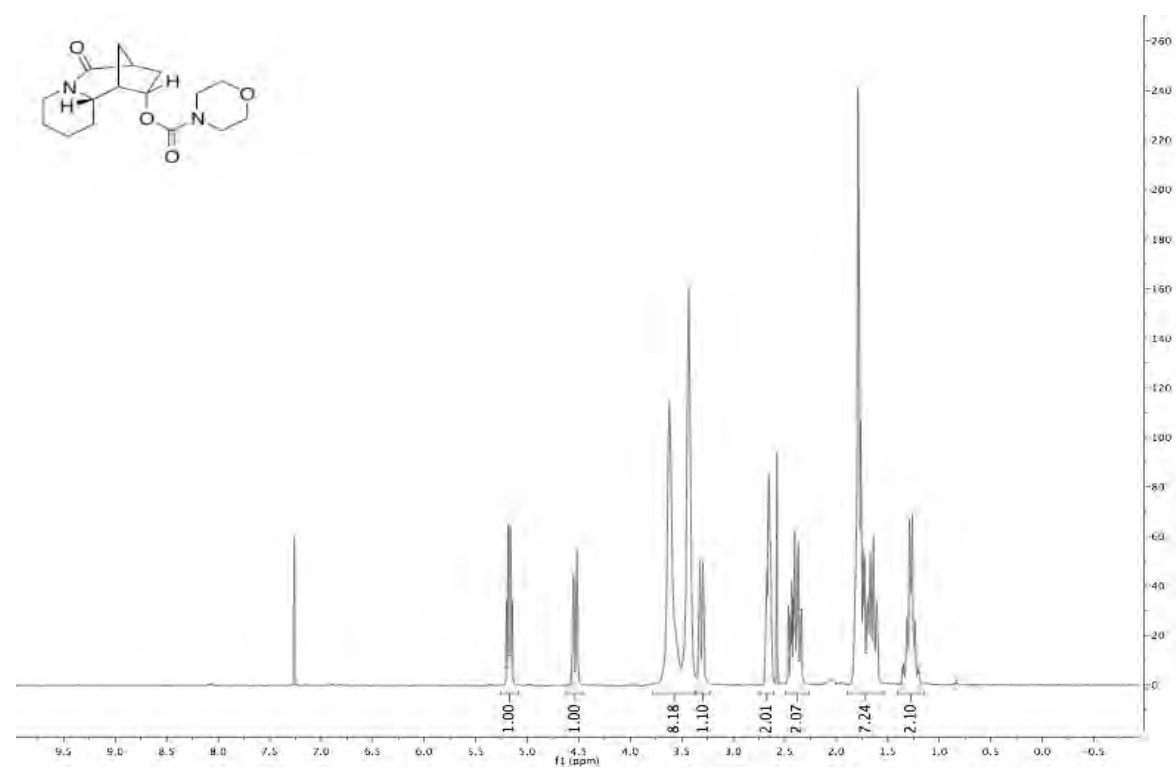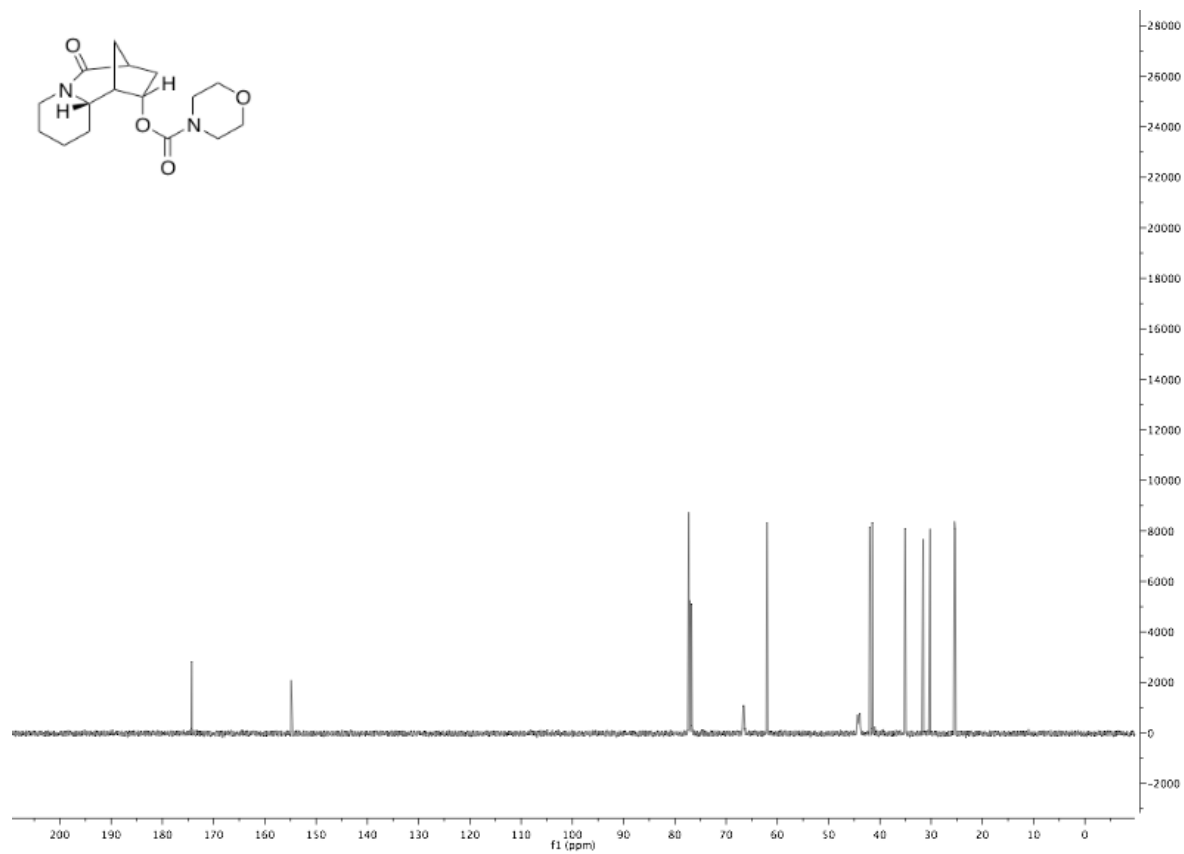

40{4}

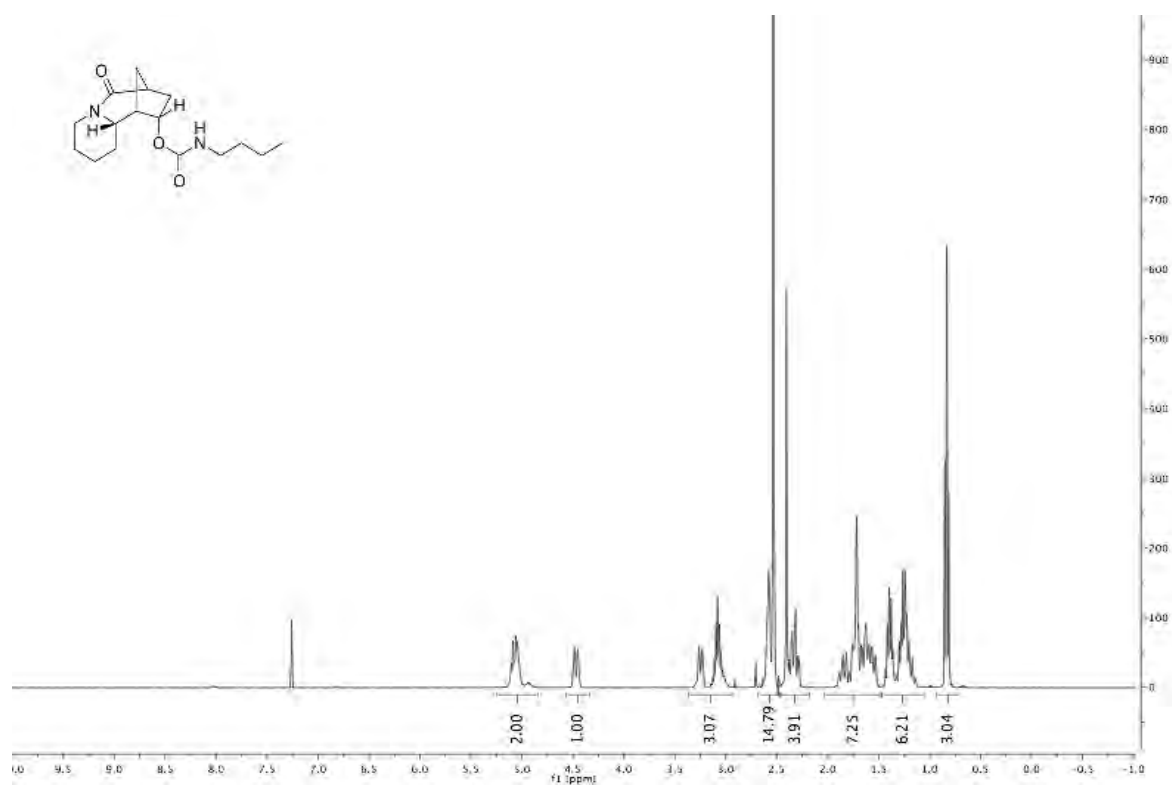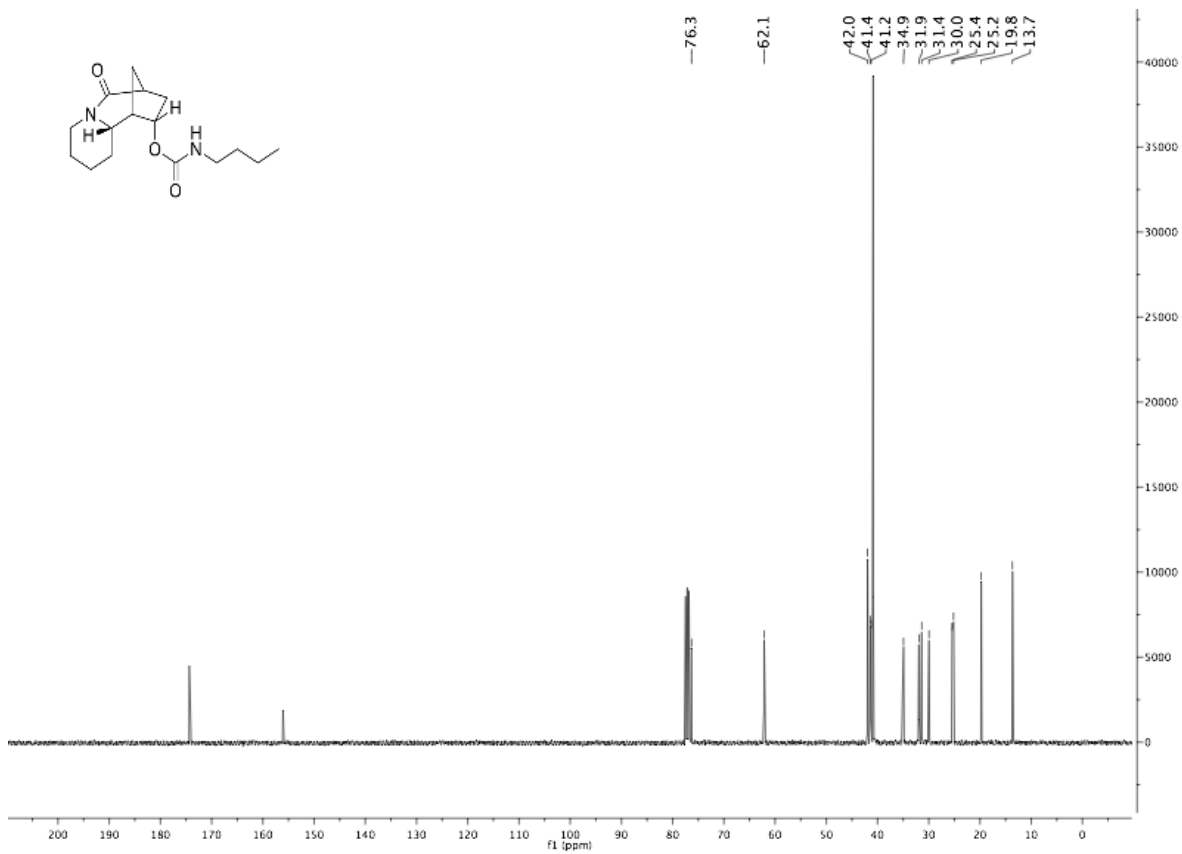

40{5}

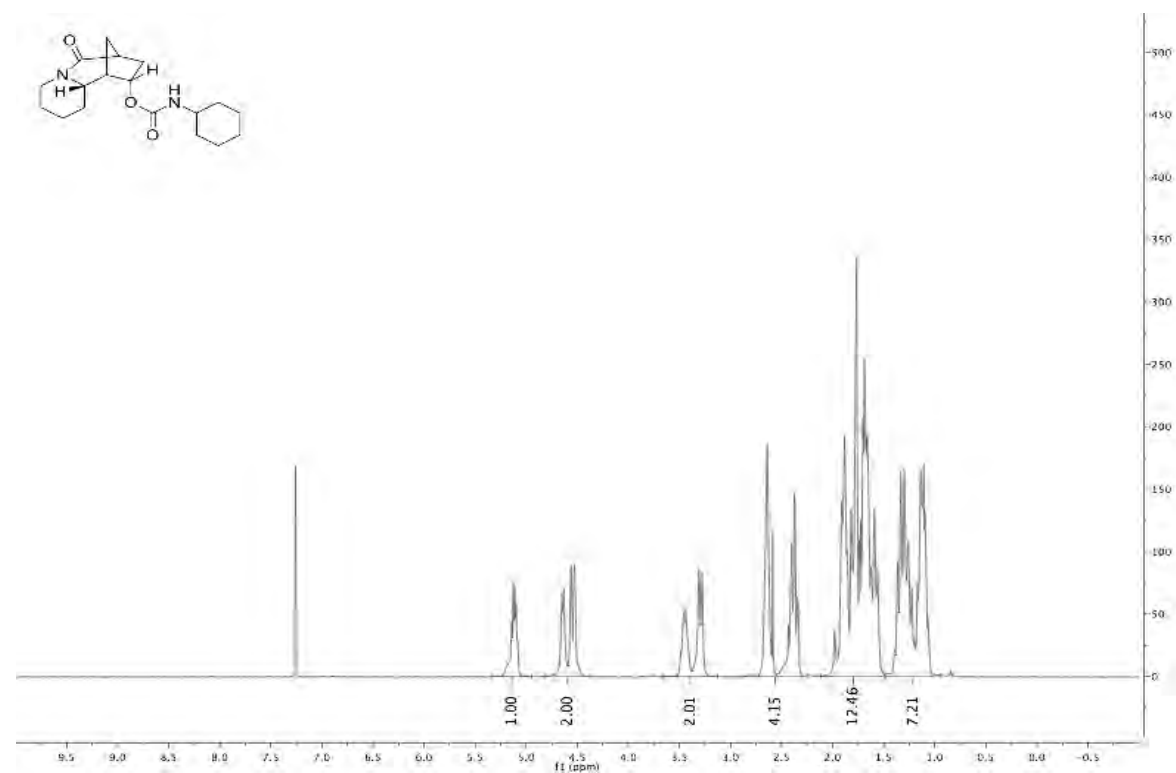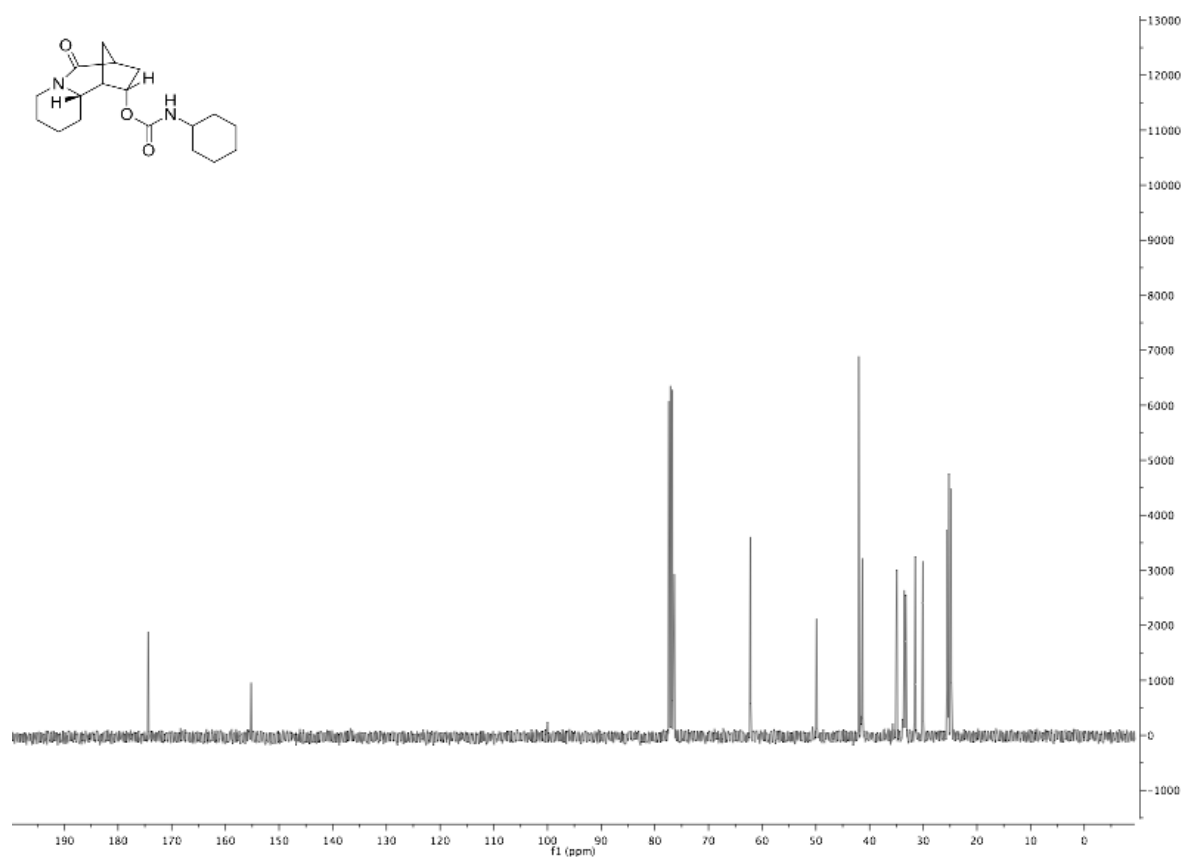

40{15}

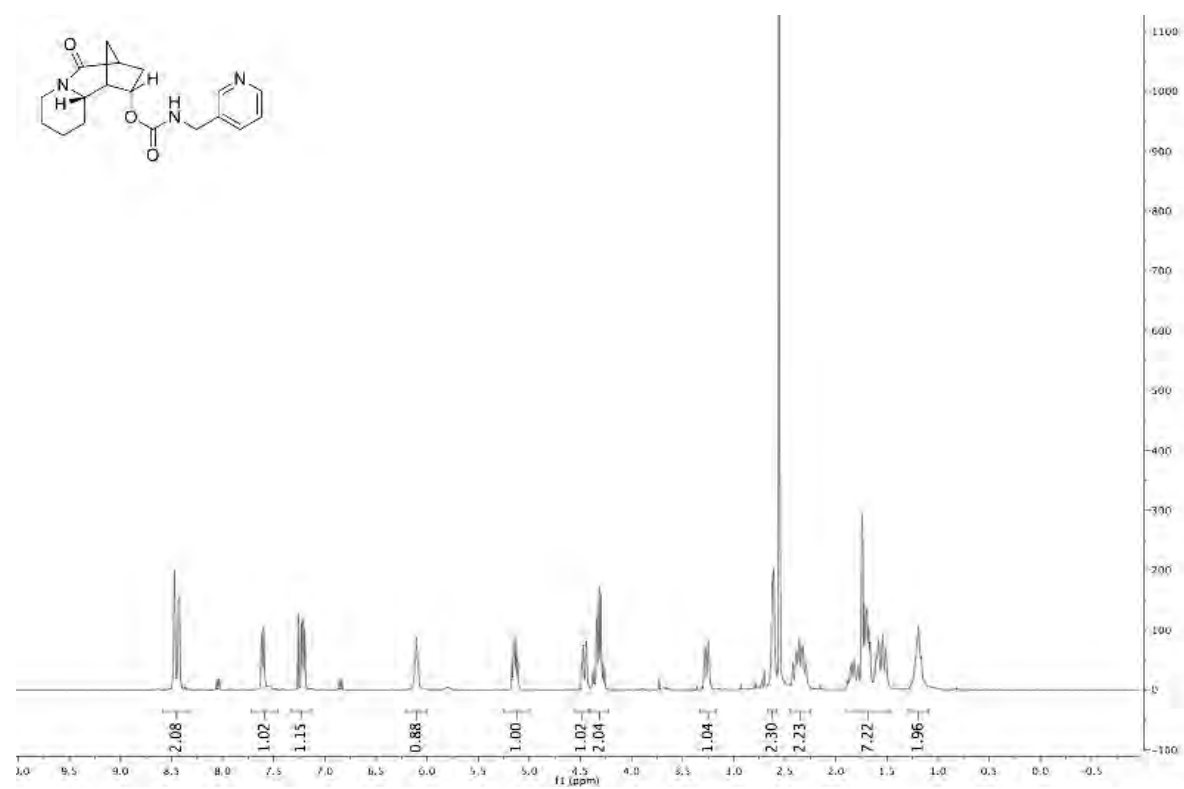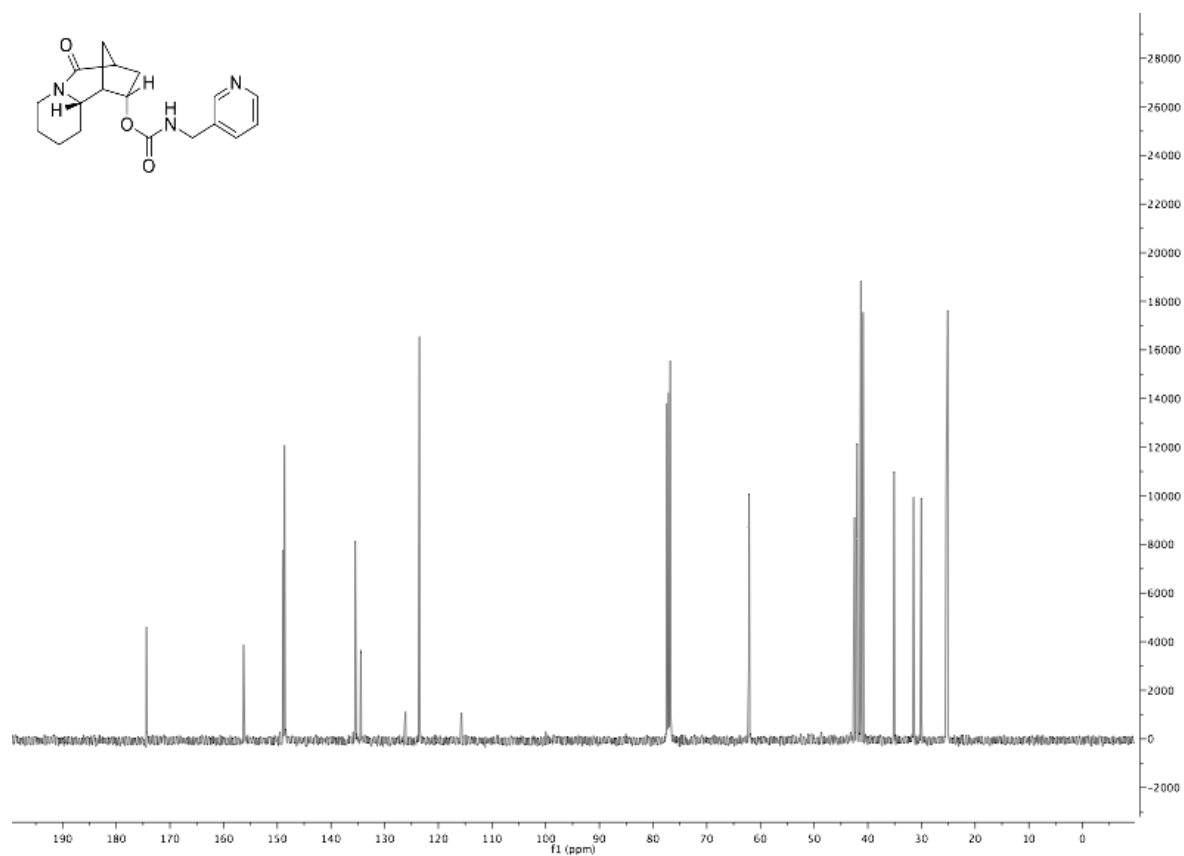



42{7}

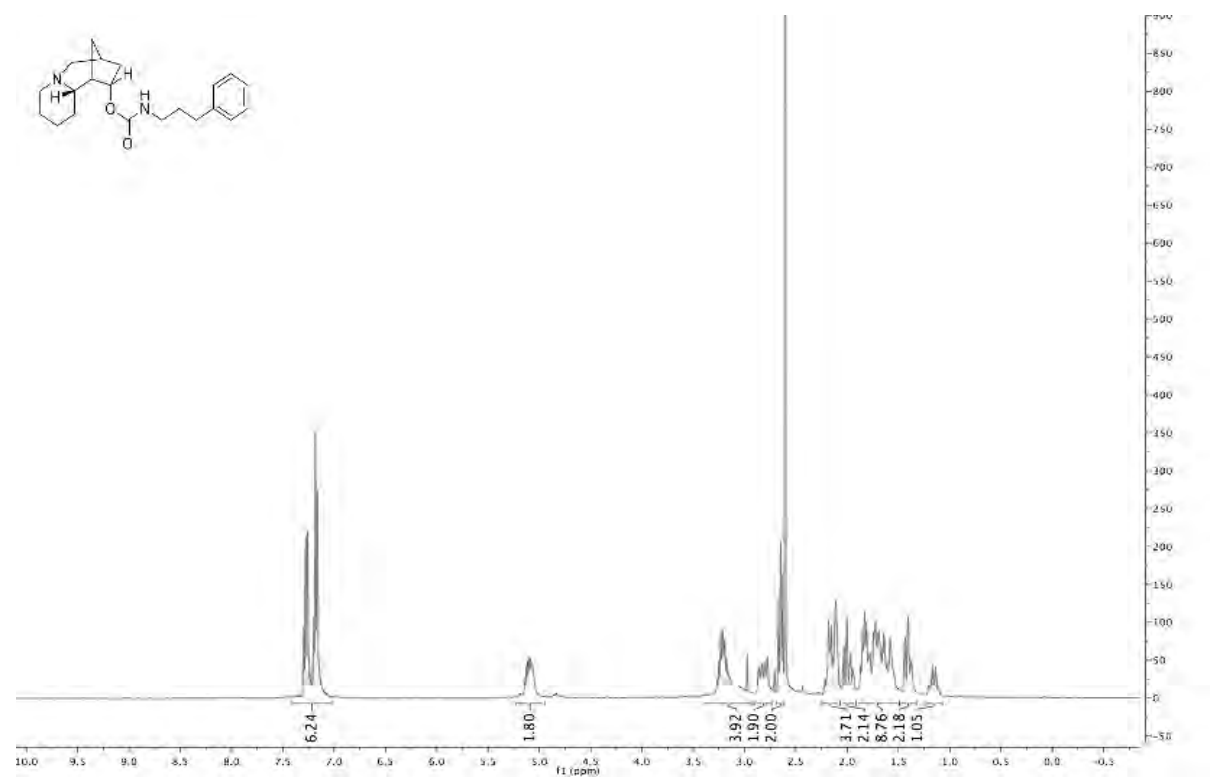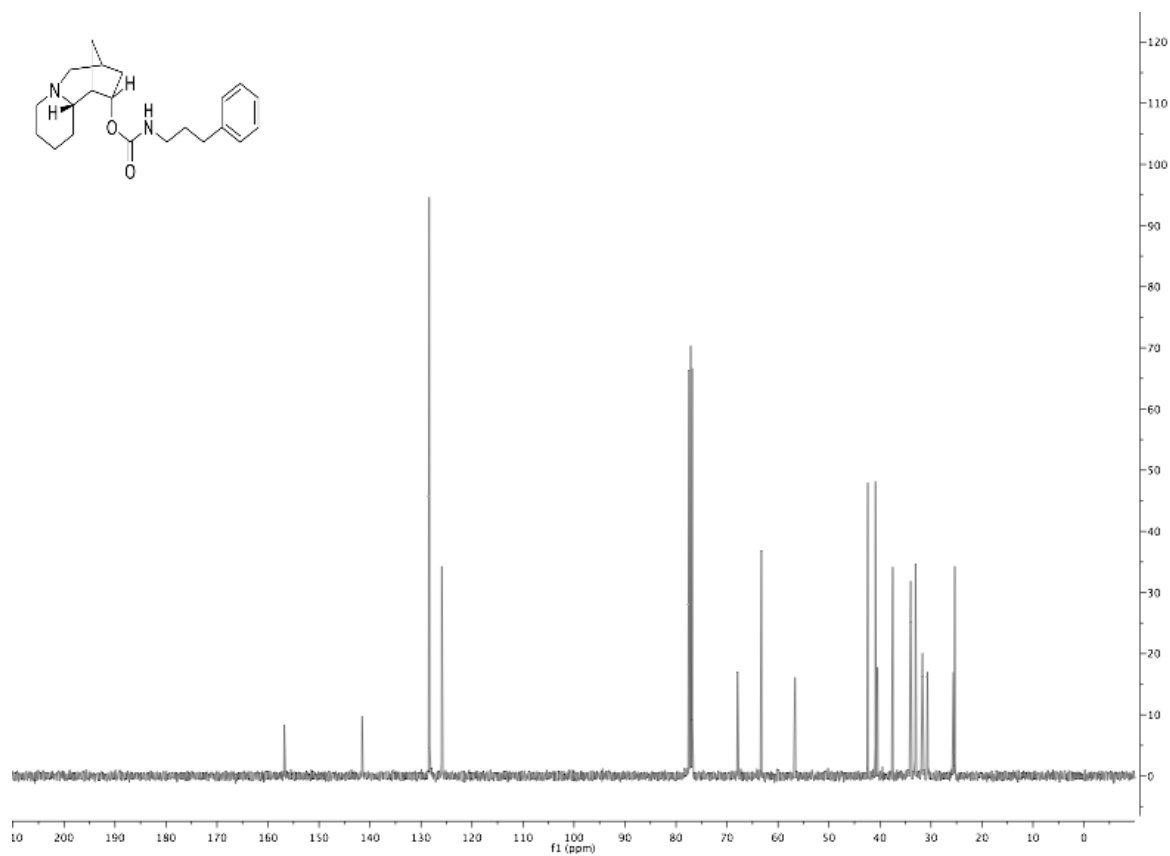

42{9}

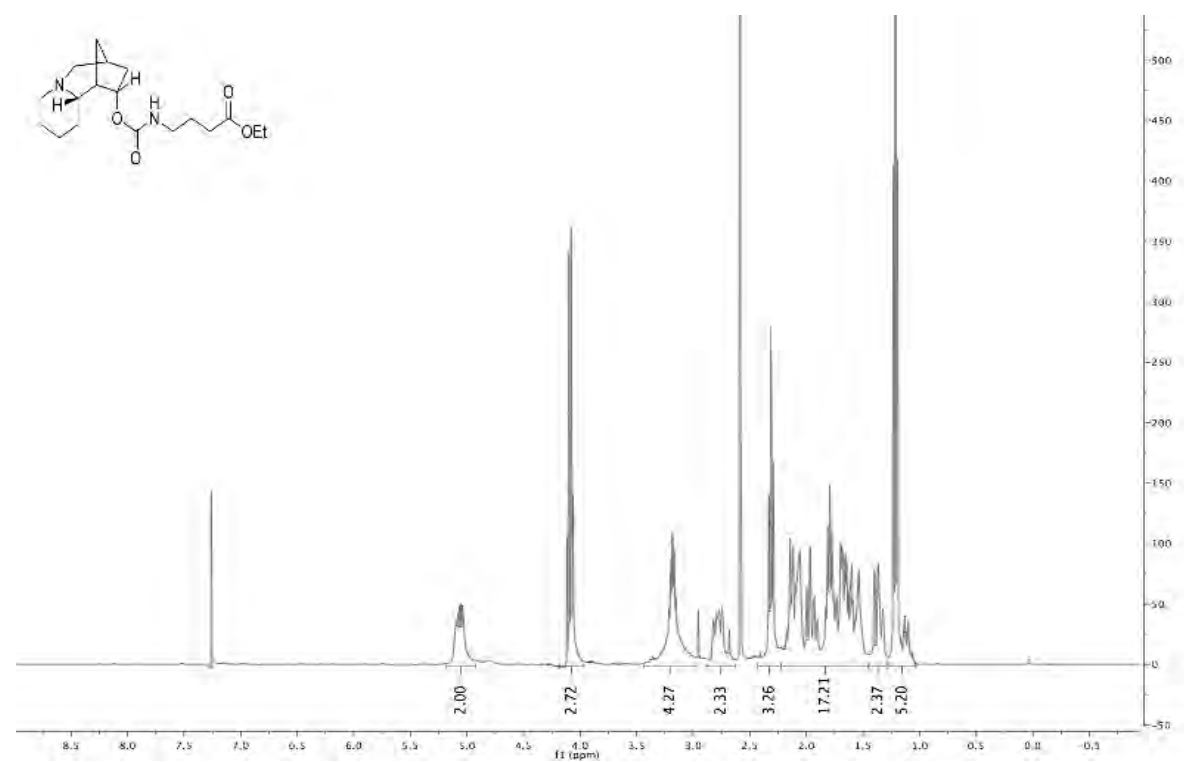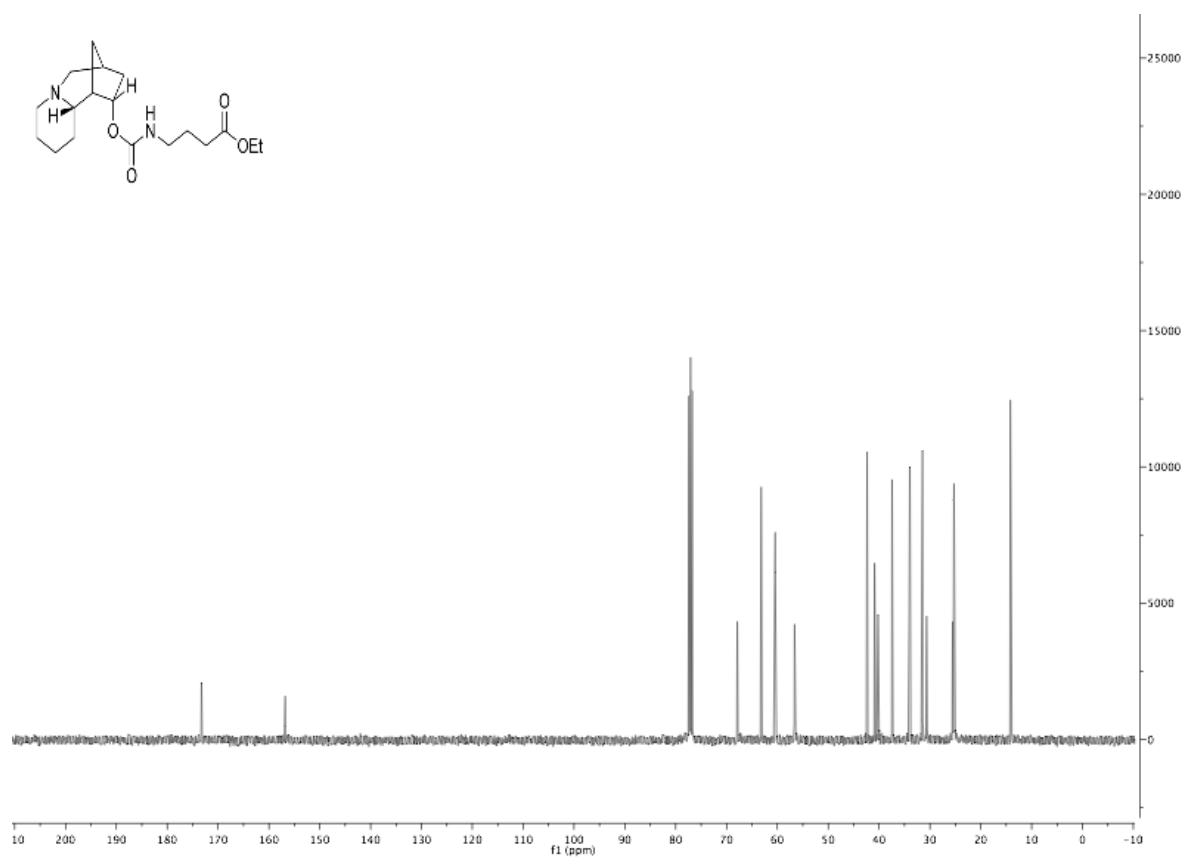

43a{2}

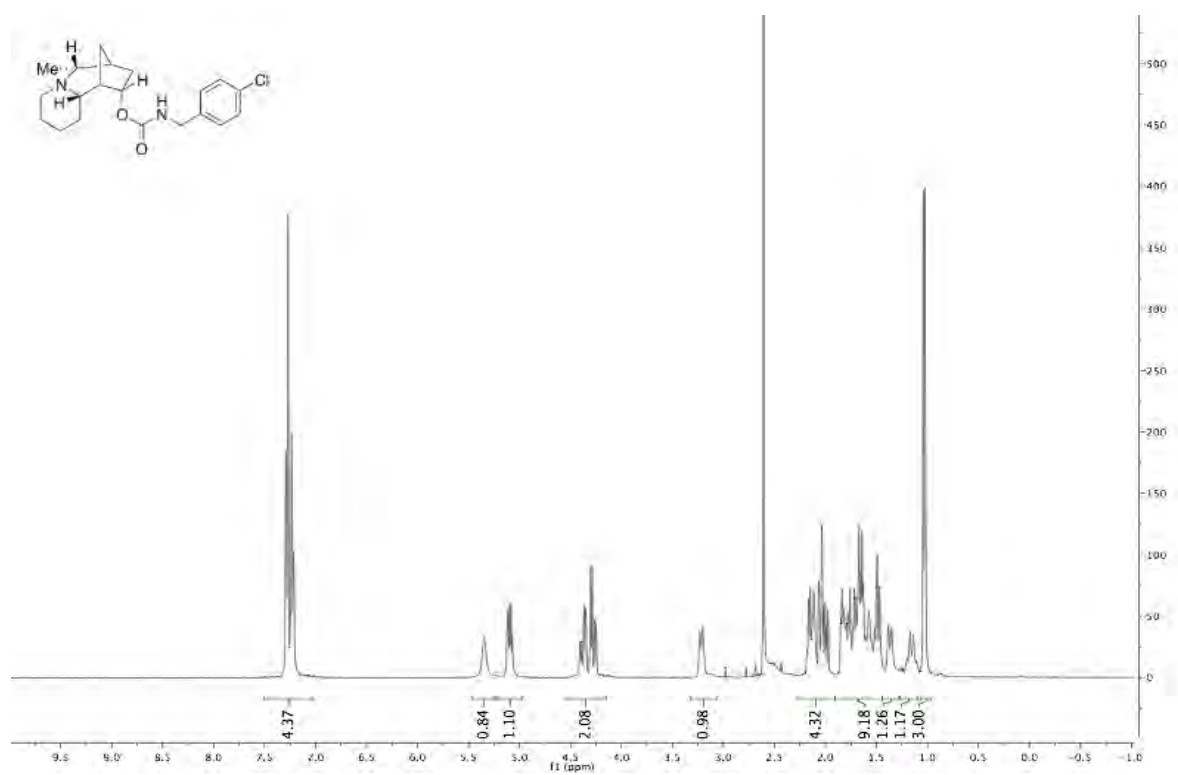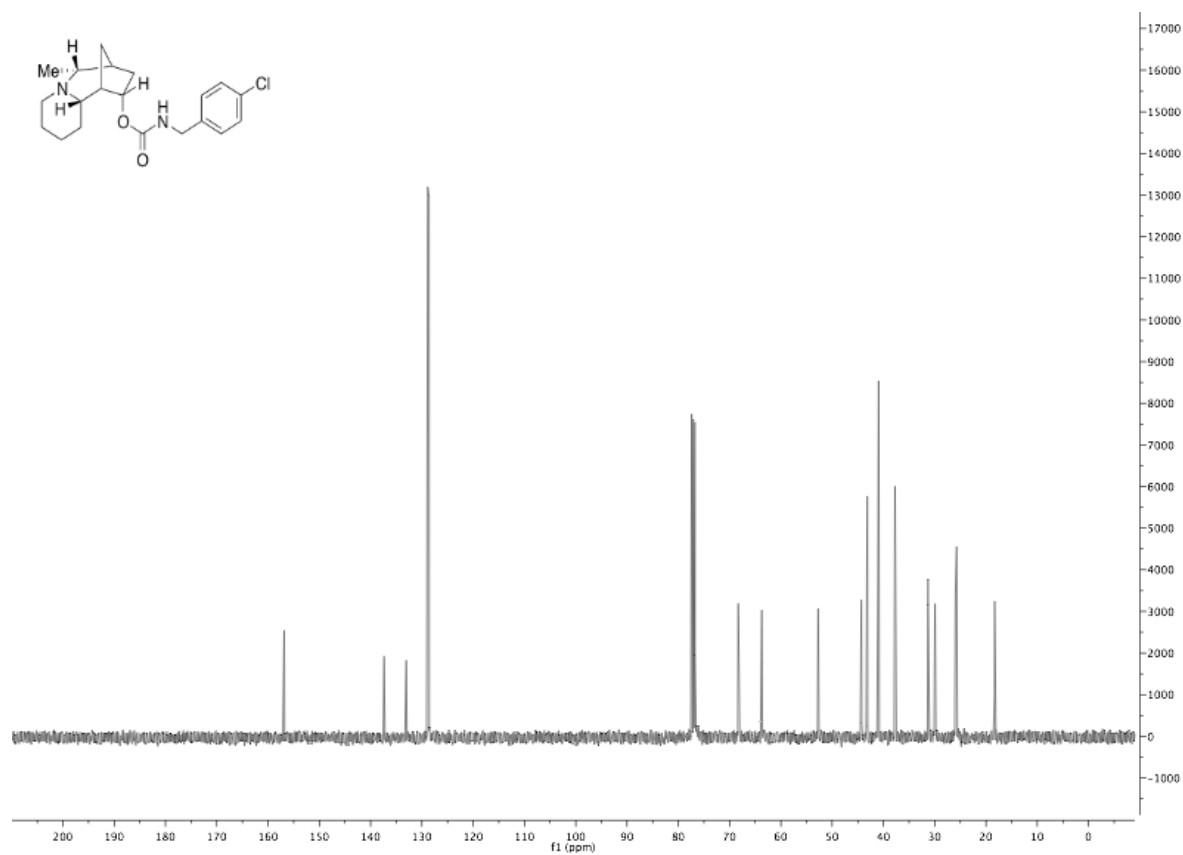

43a{3}

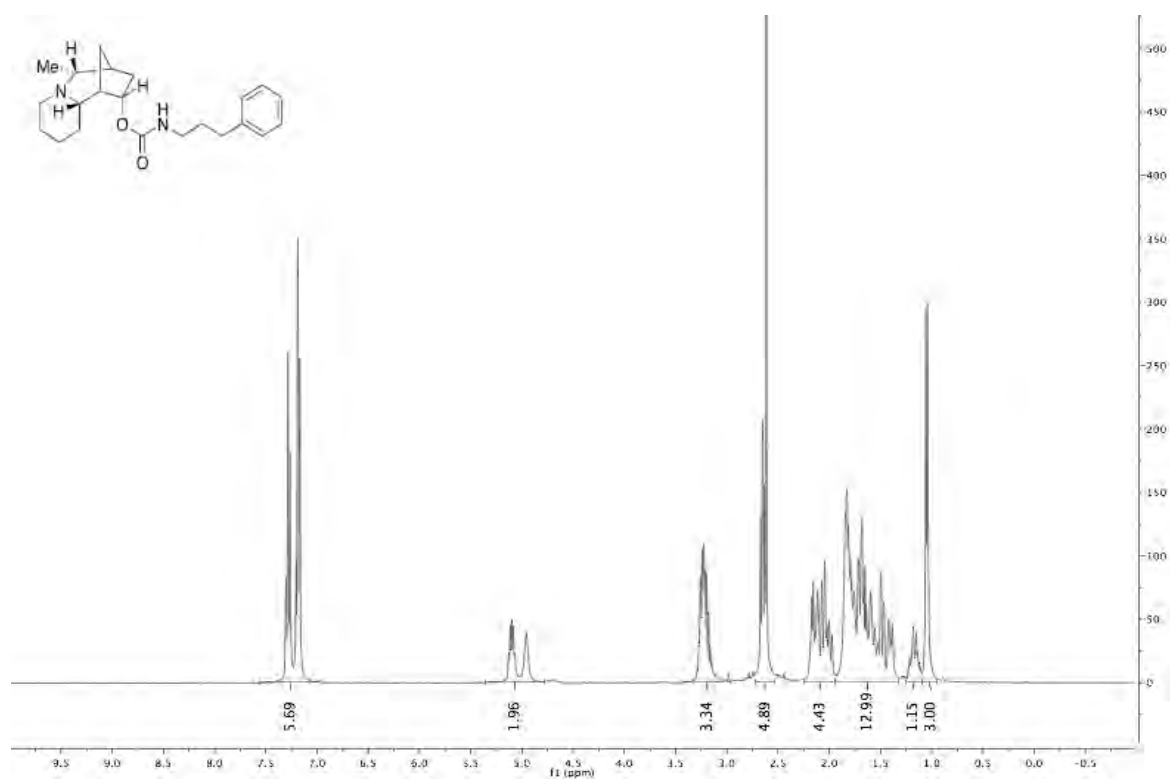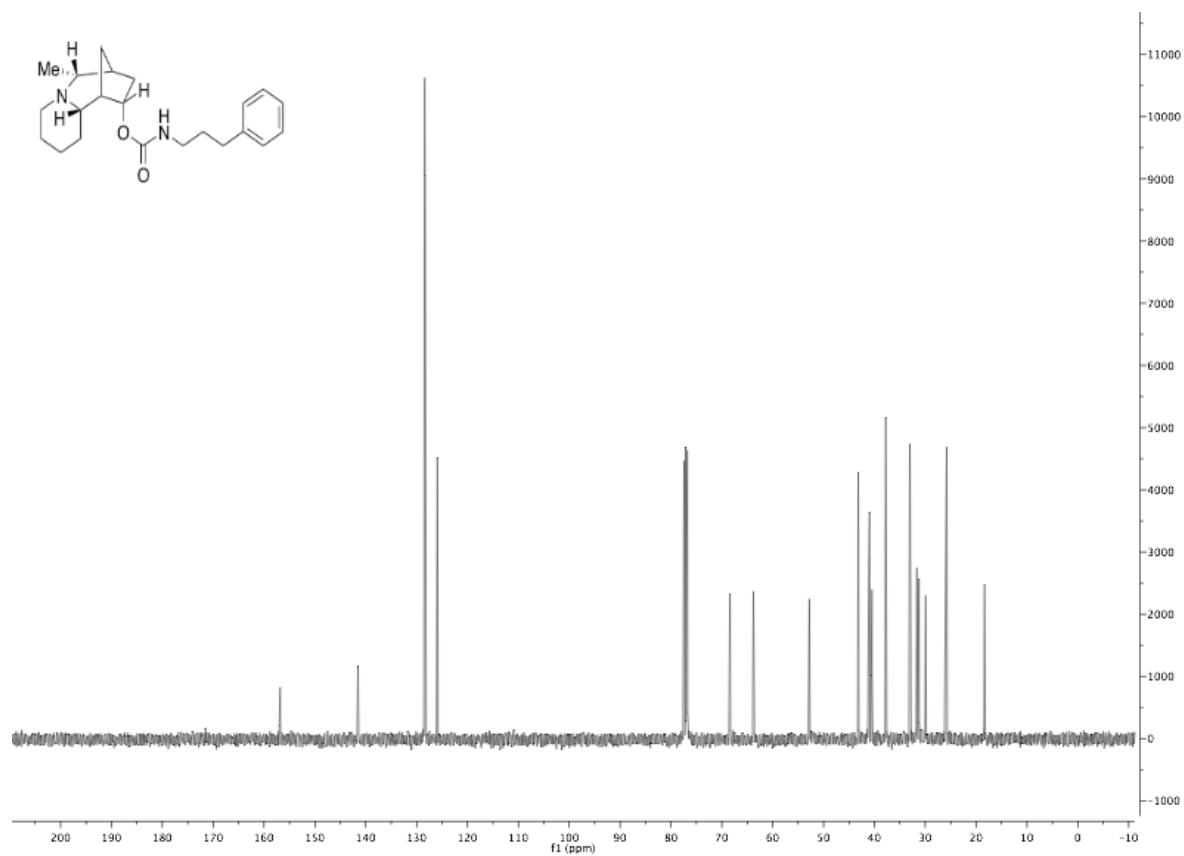

43b{11}

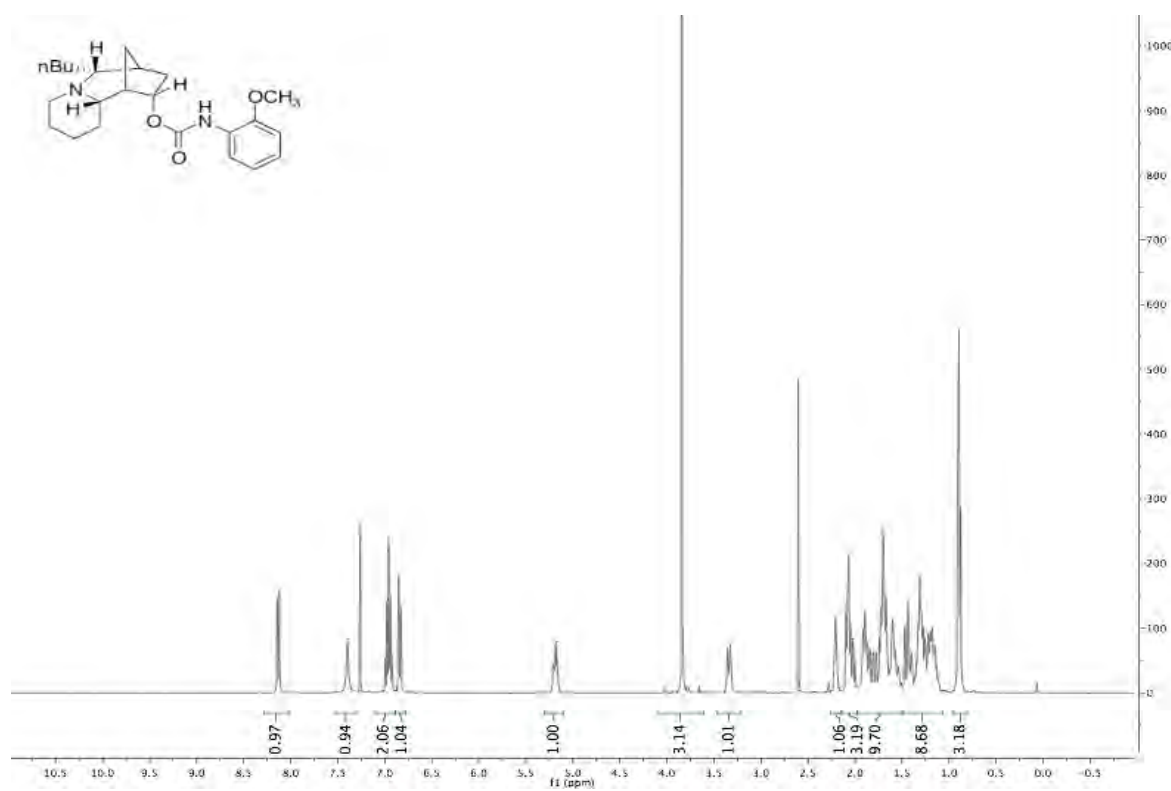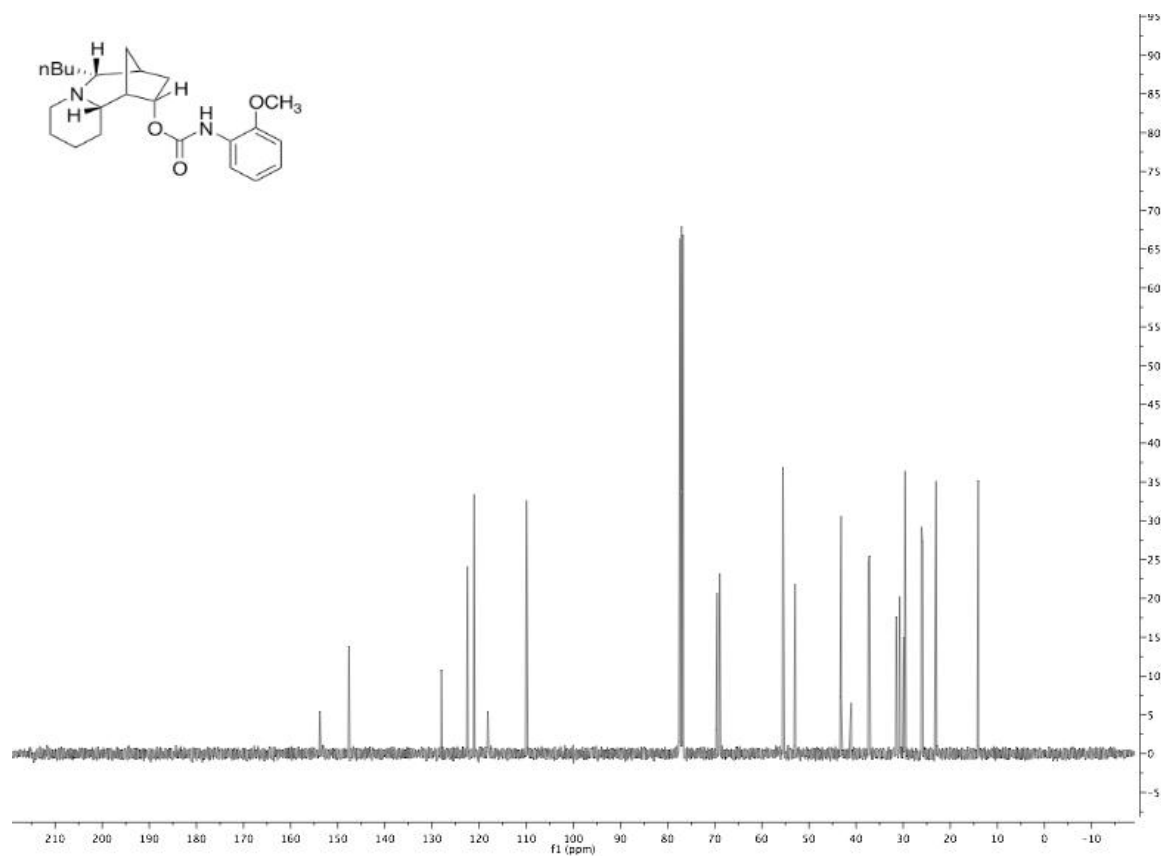

43b{9}

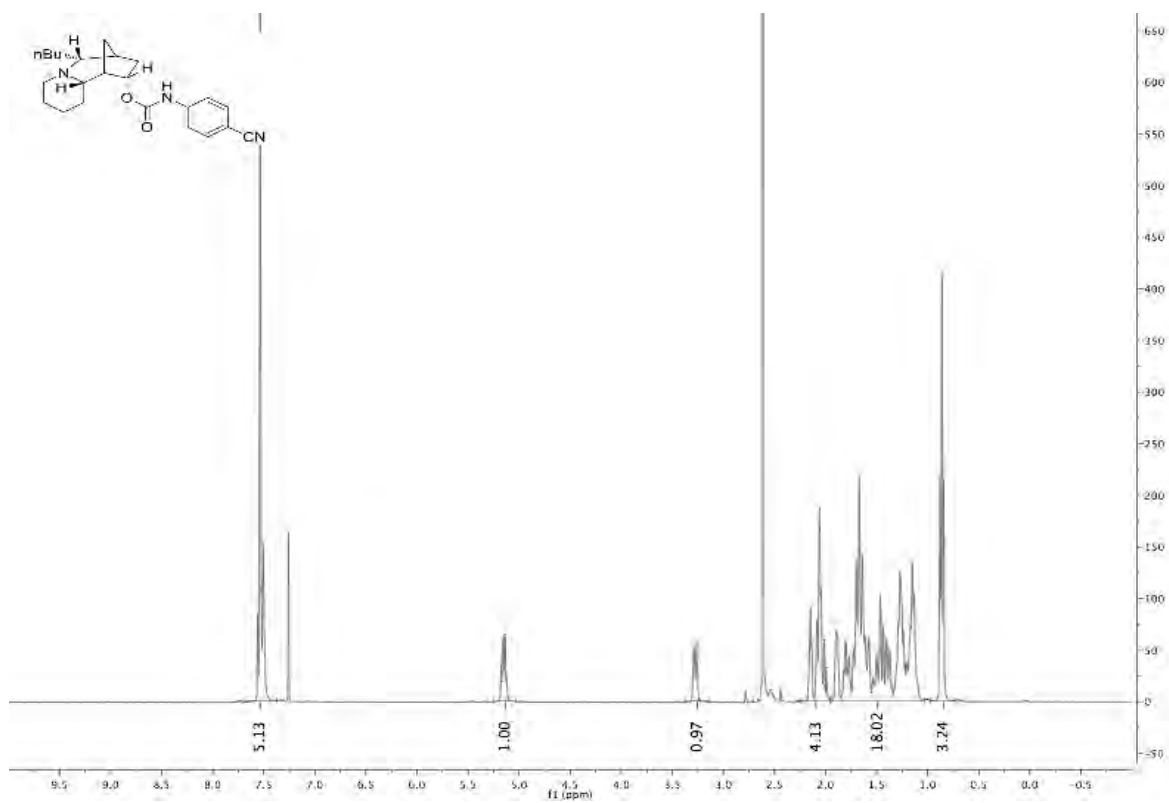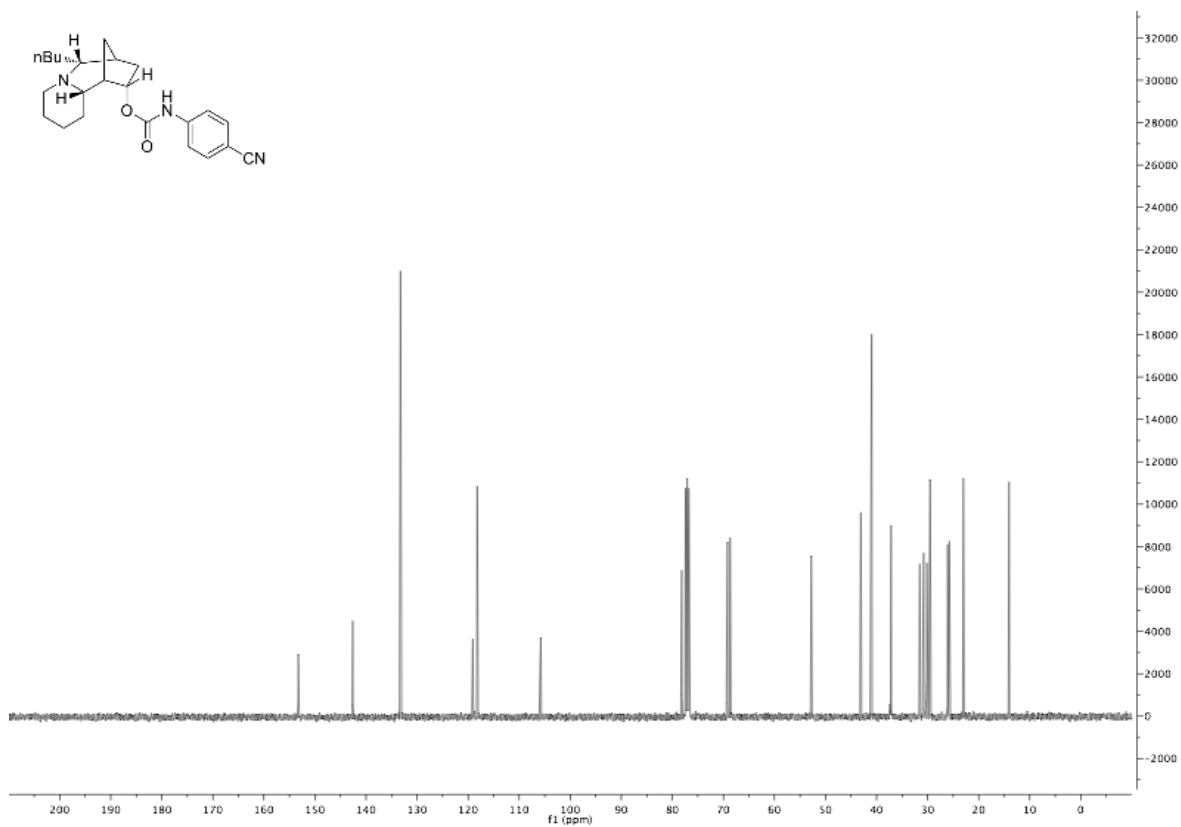

43c{4}

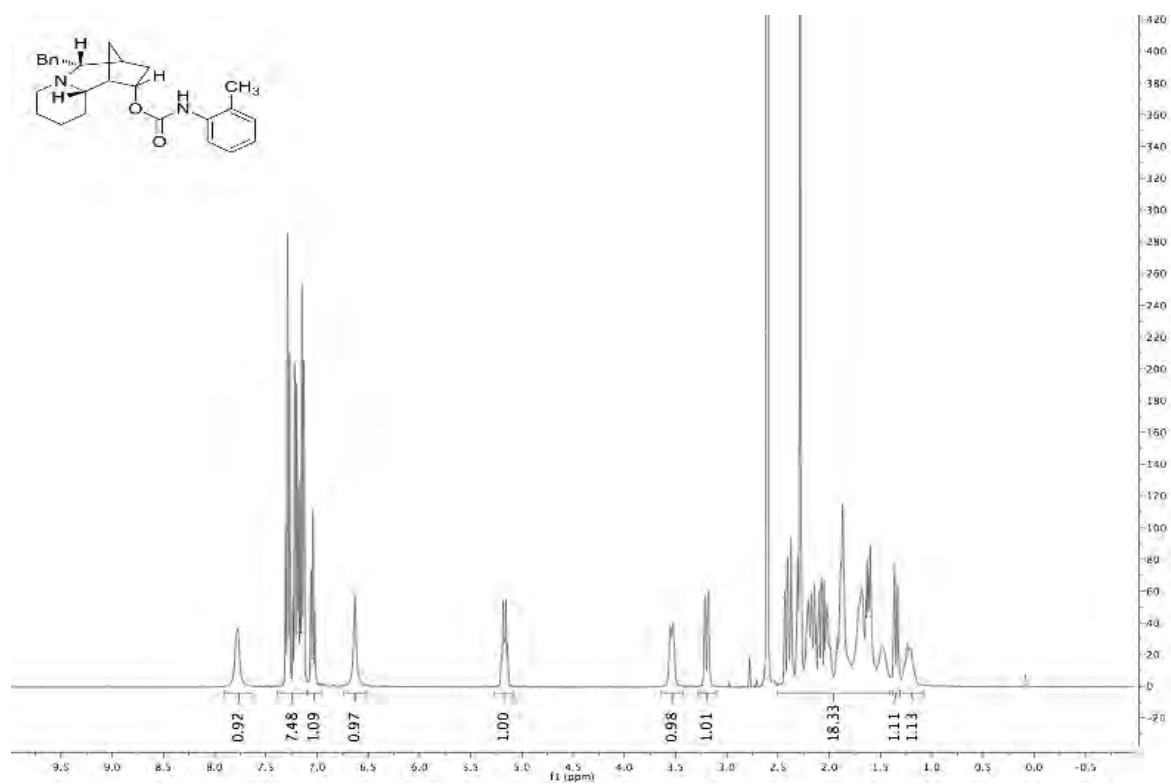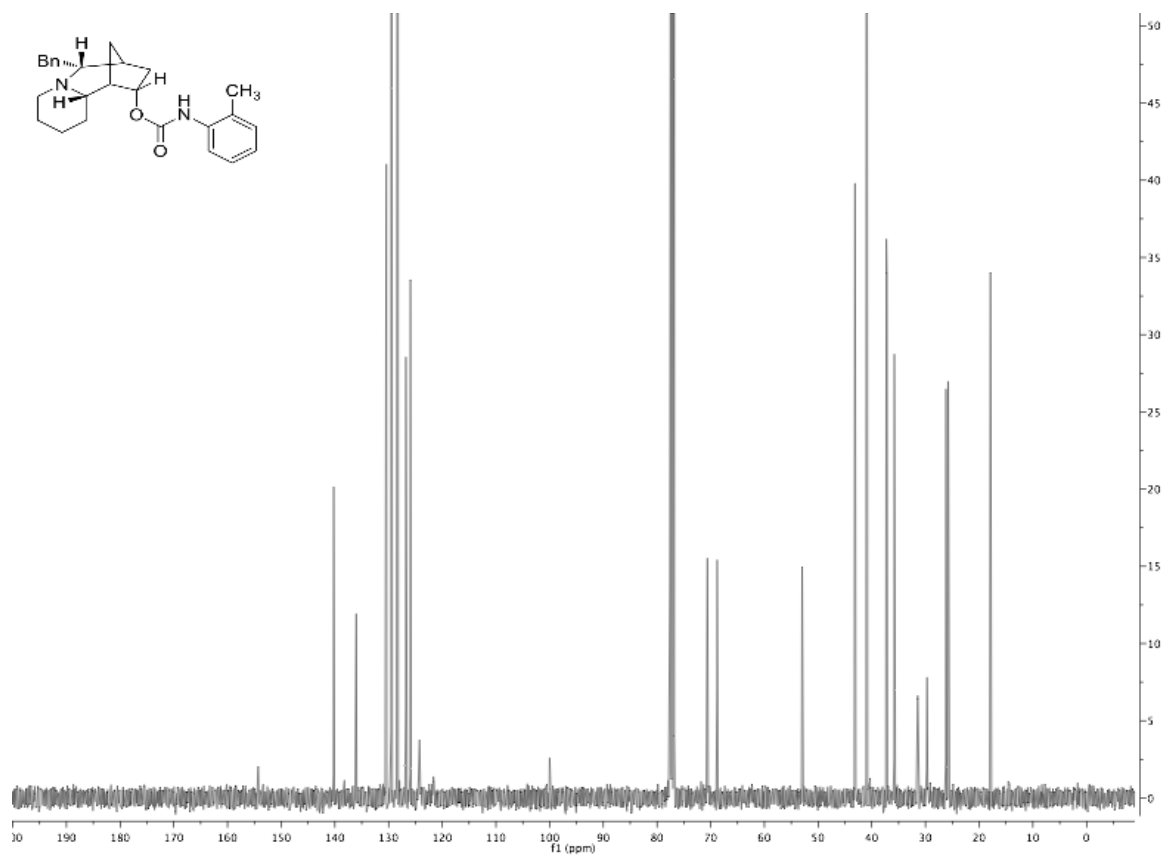

43c{5}

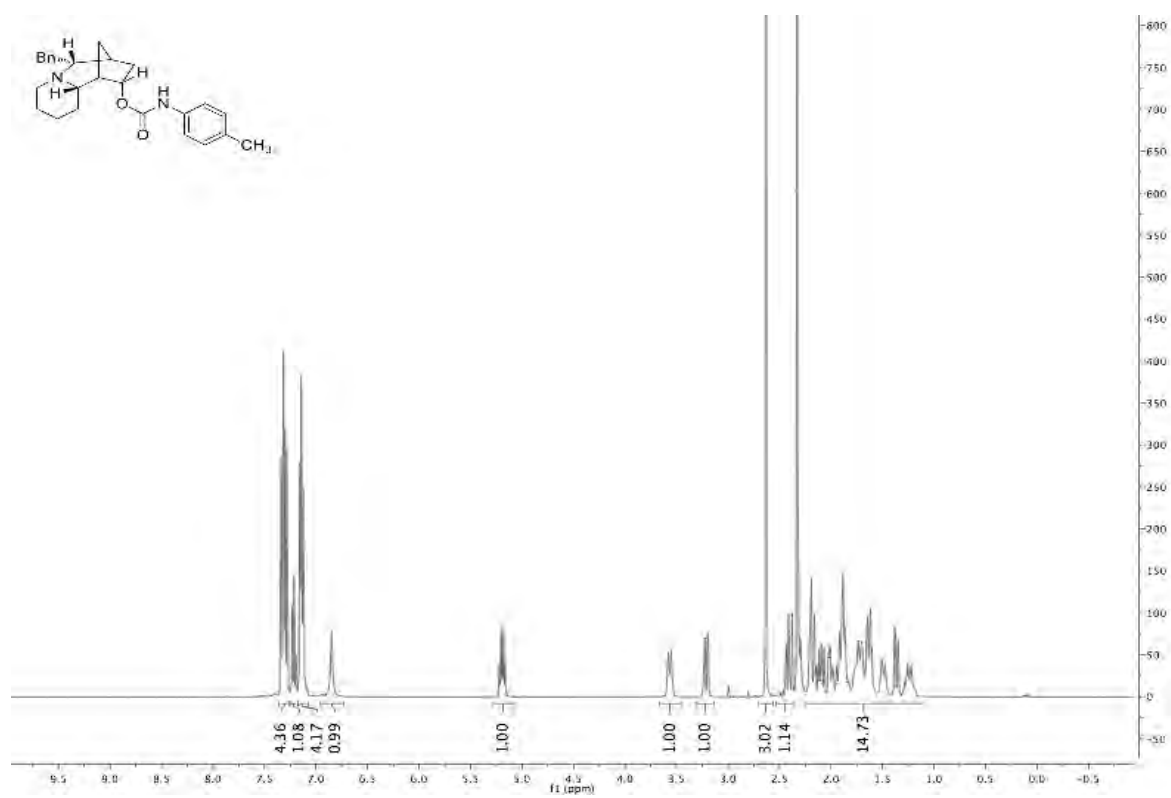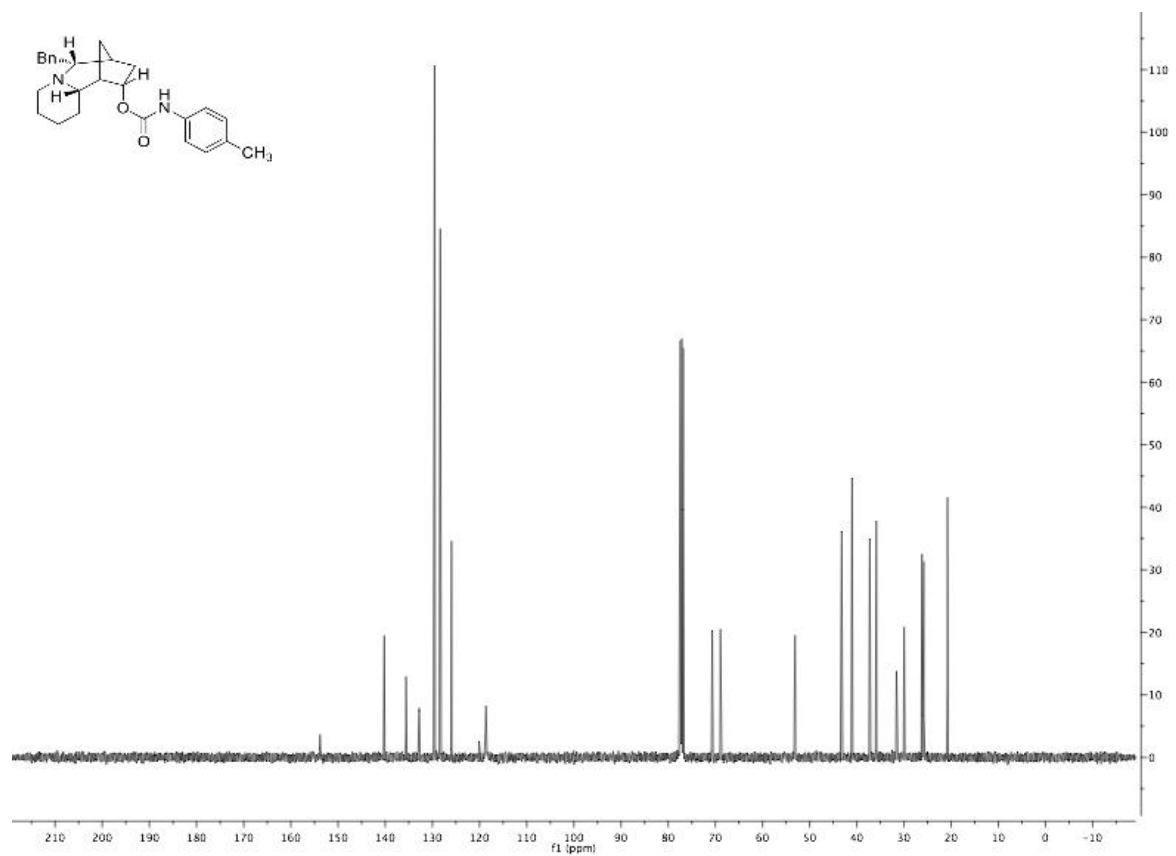



43c{8}

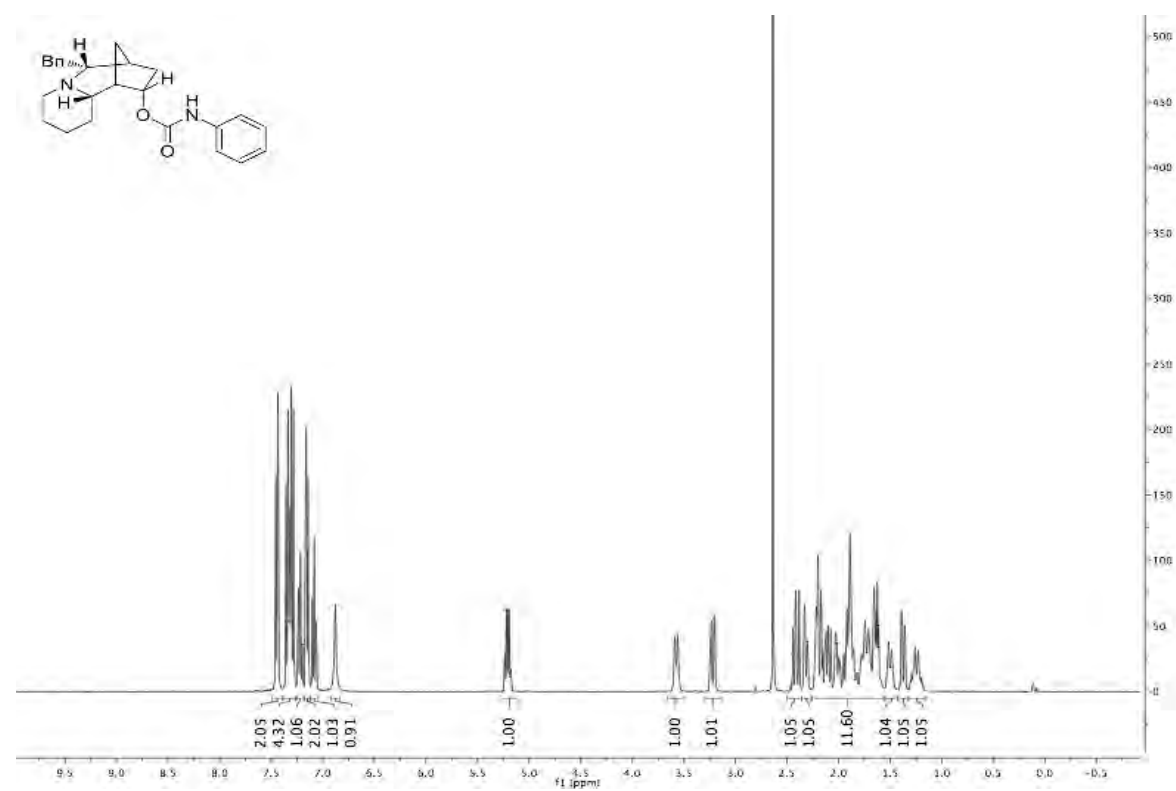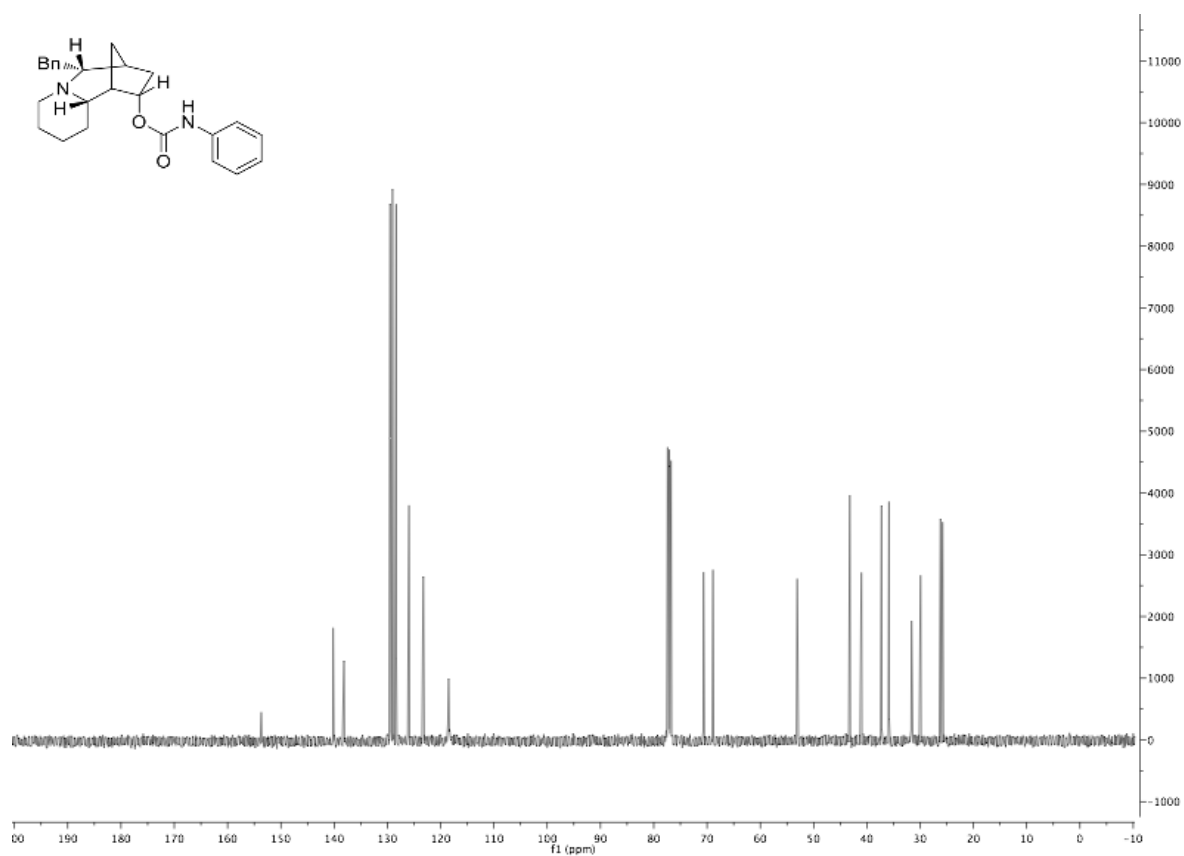

Mesembrine-inspired series:

Hydroxyketone **S15**

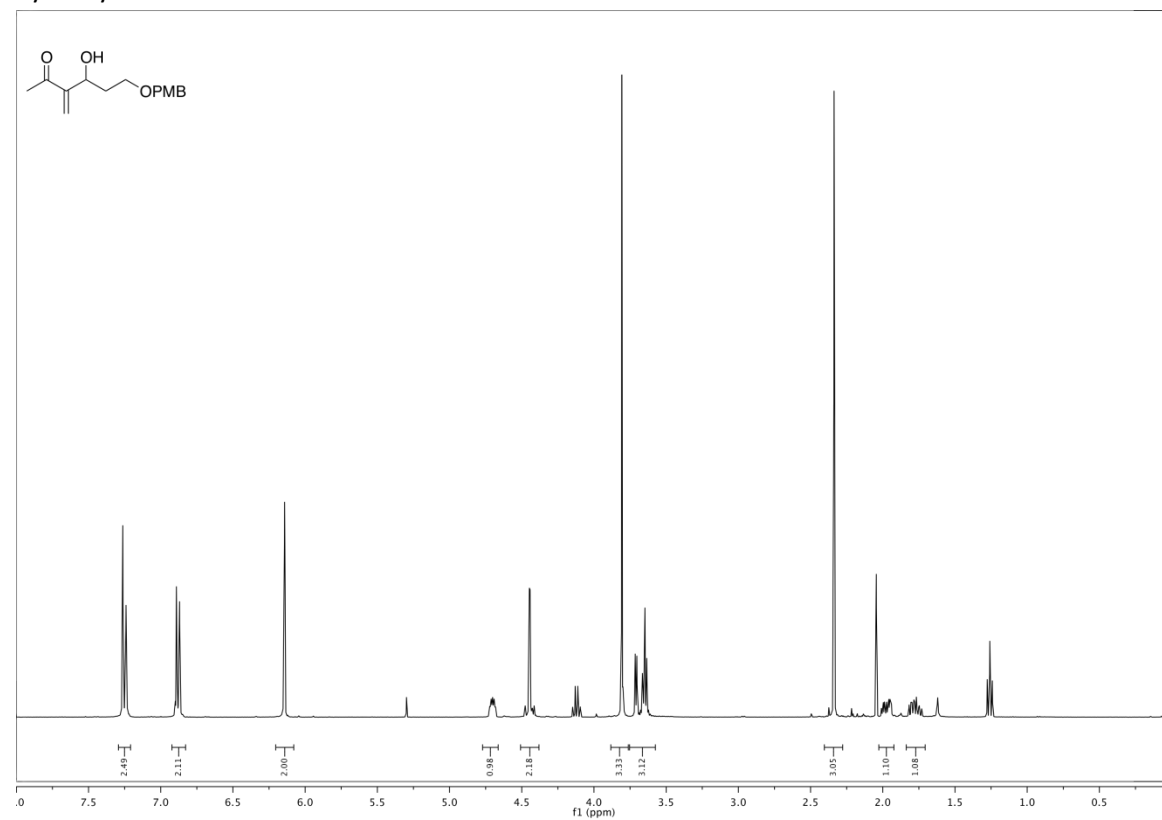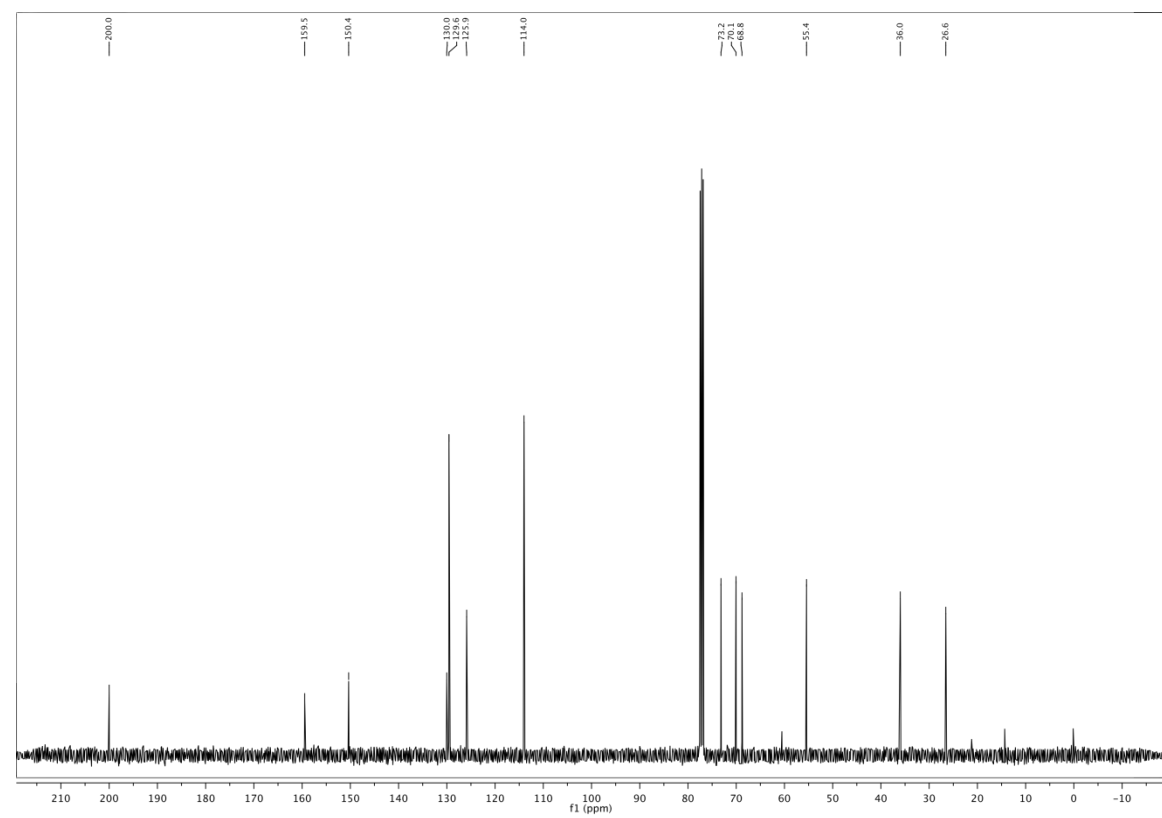

# Enone S16a

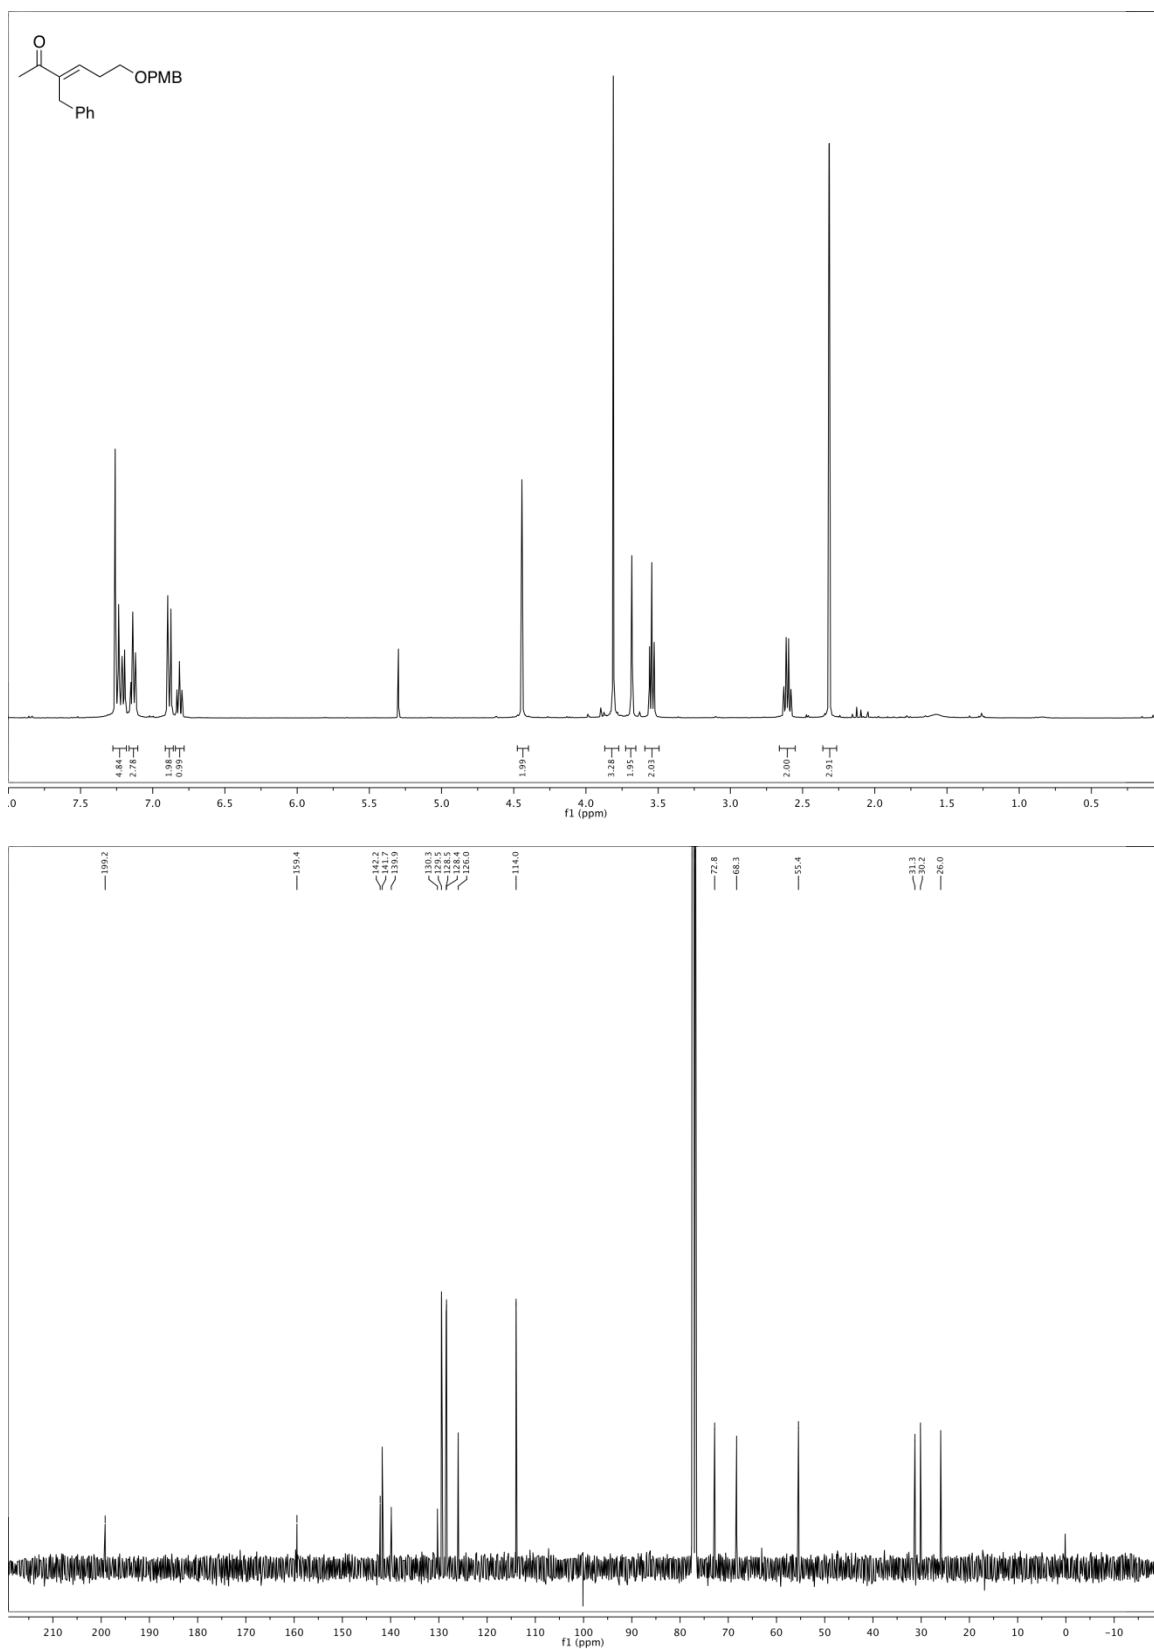

# Enone S16b

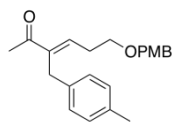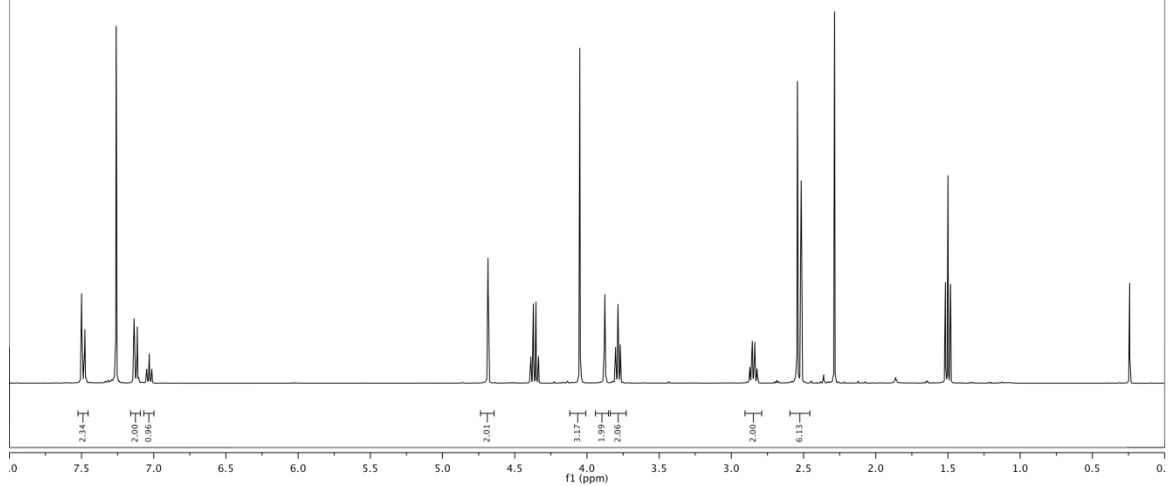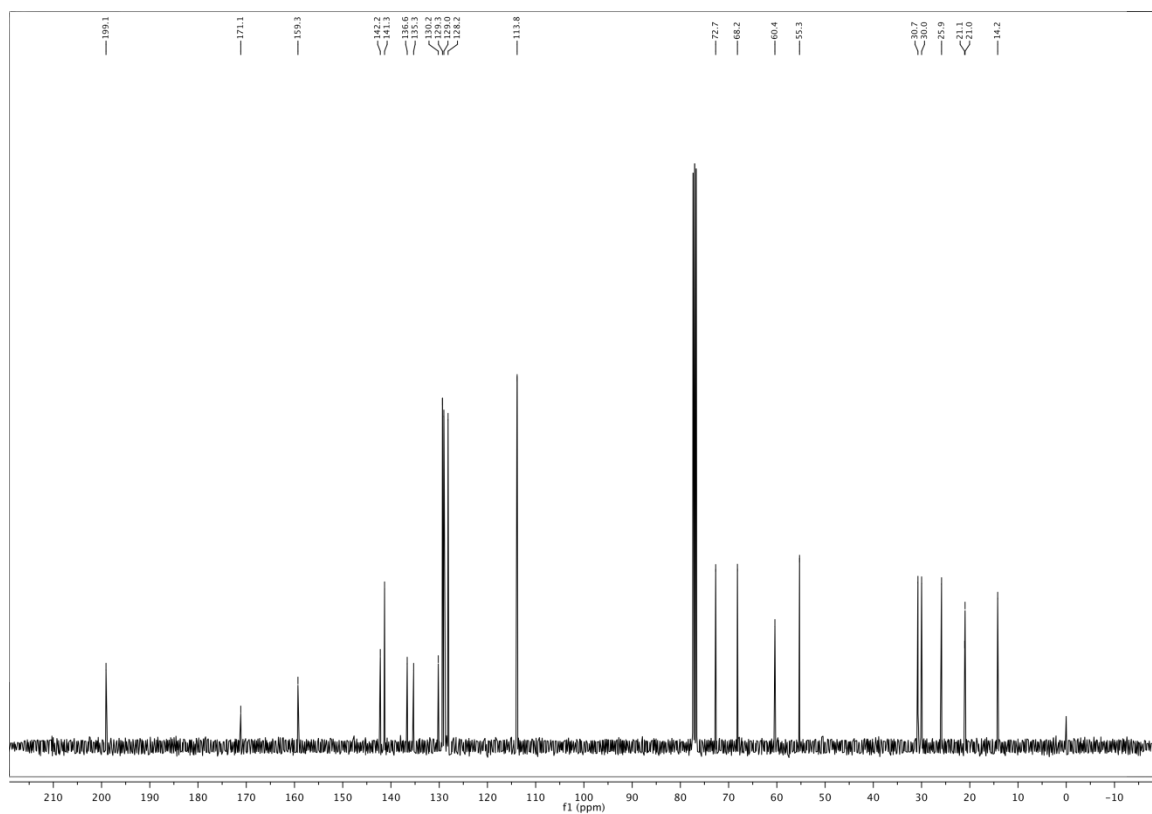

# Enone S16c

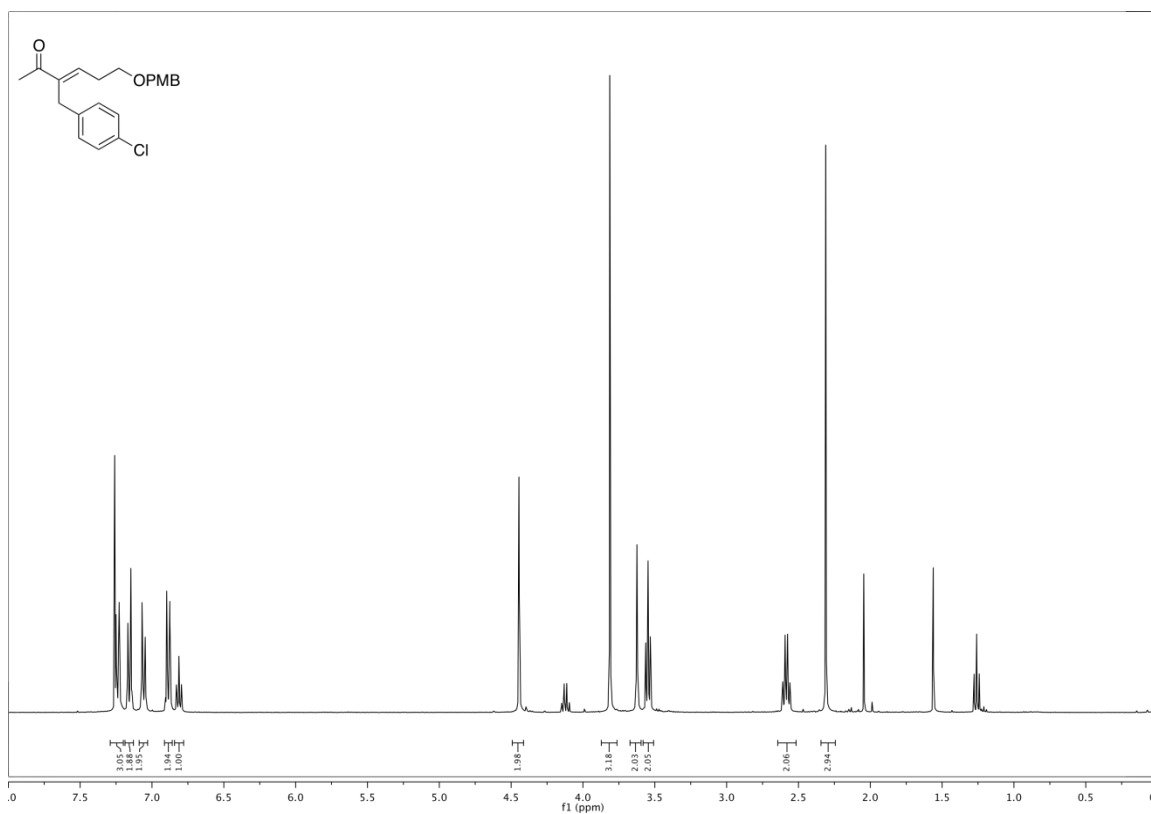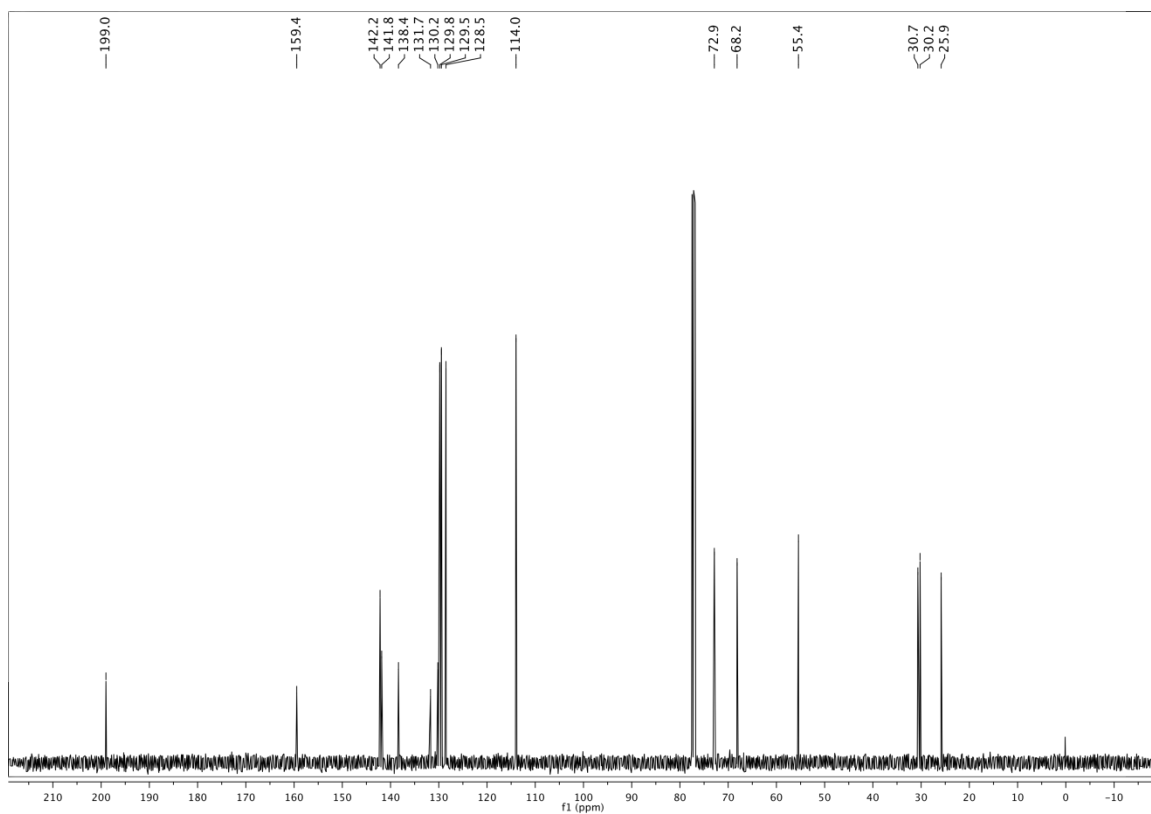

# Enone S16d

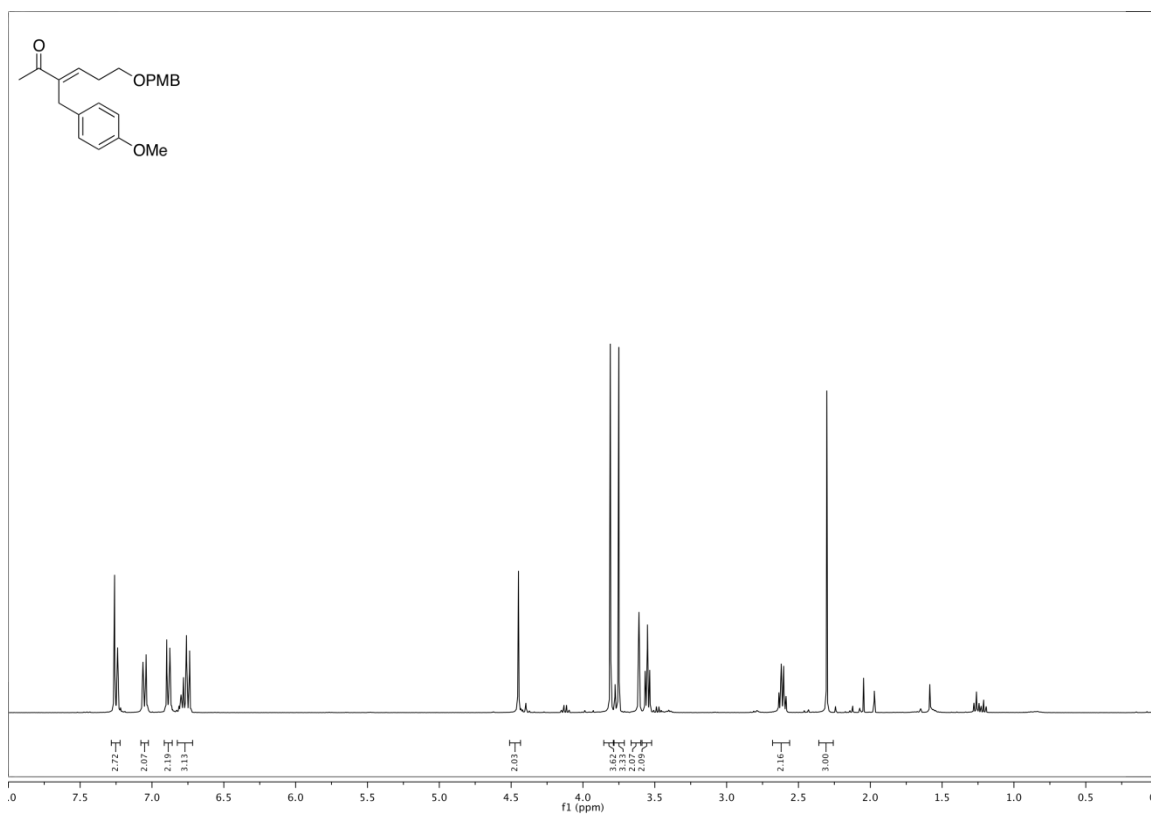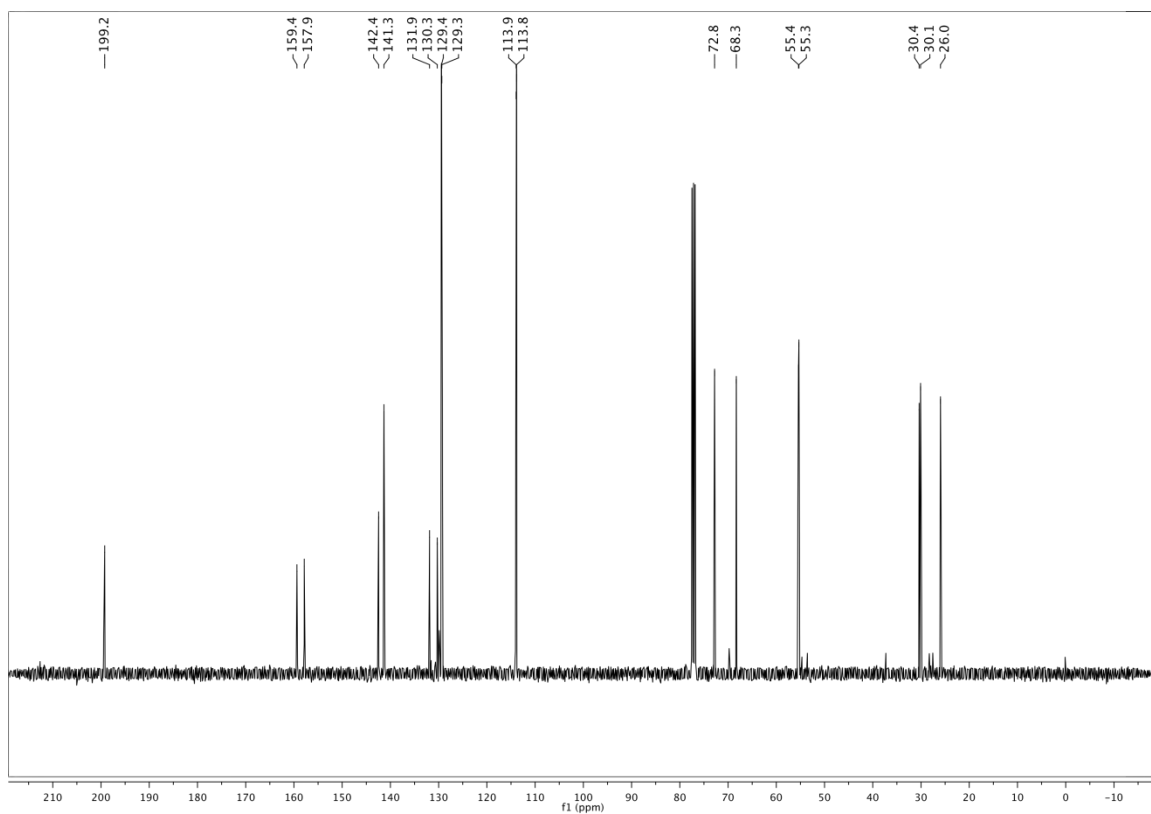

# Silyloxydiene 22a

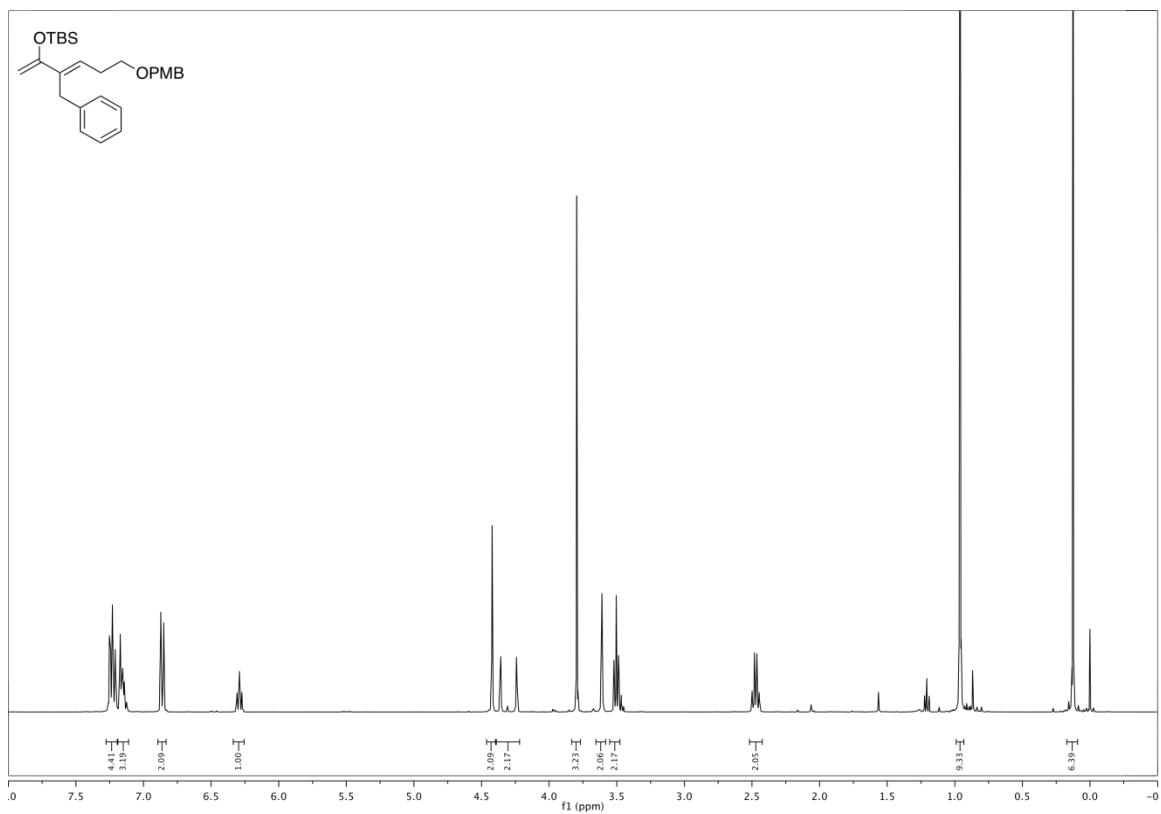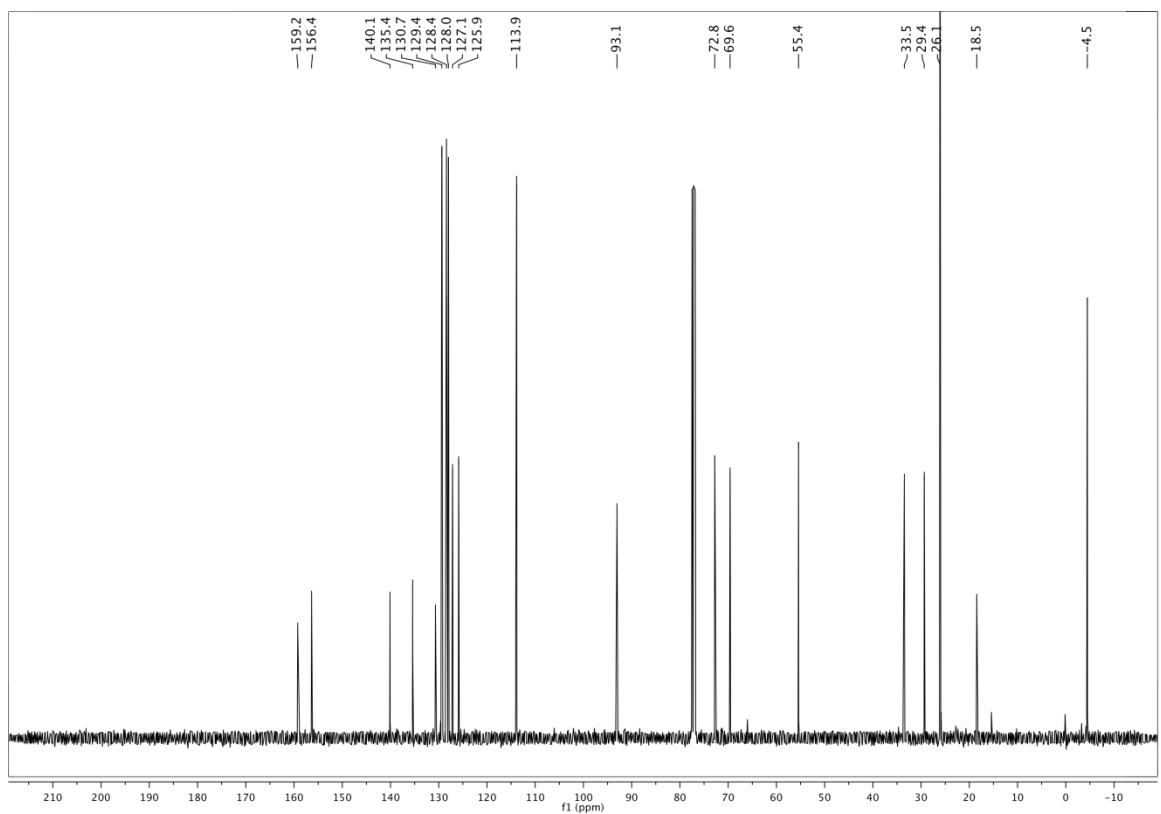

# Silyloxydiene 22b

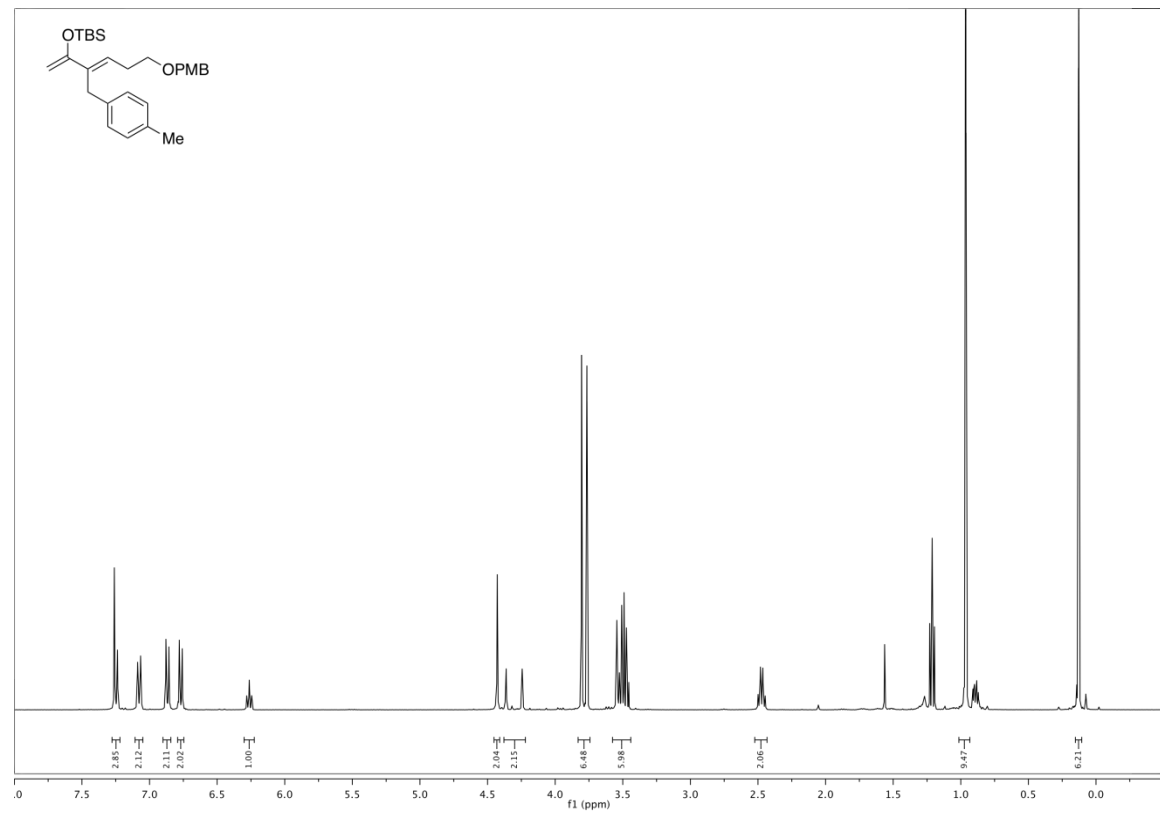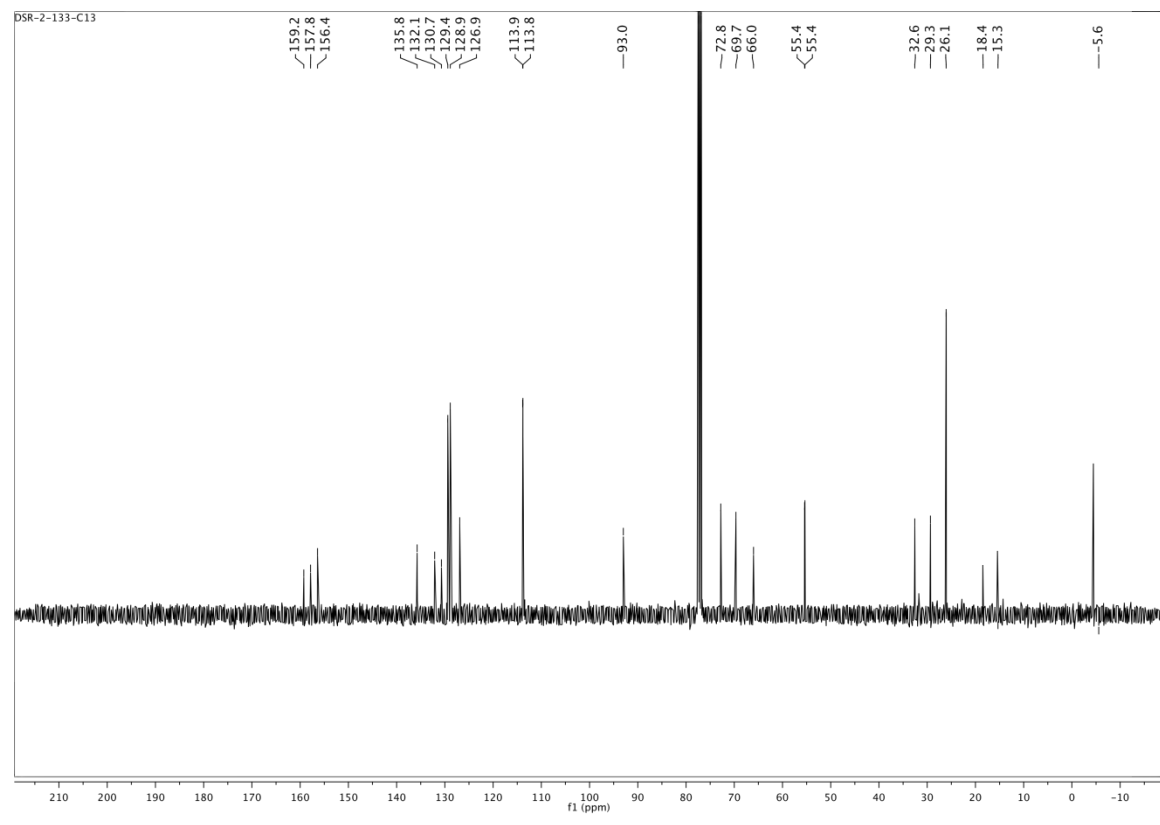



Silyloxydiene **22c**

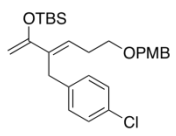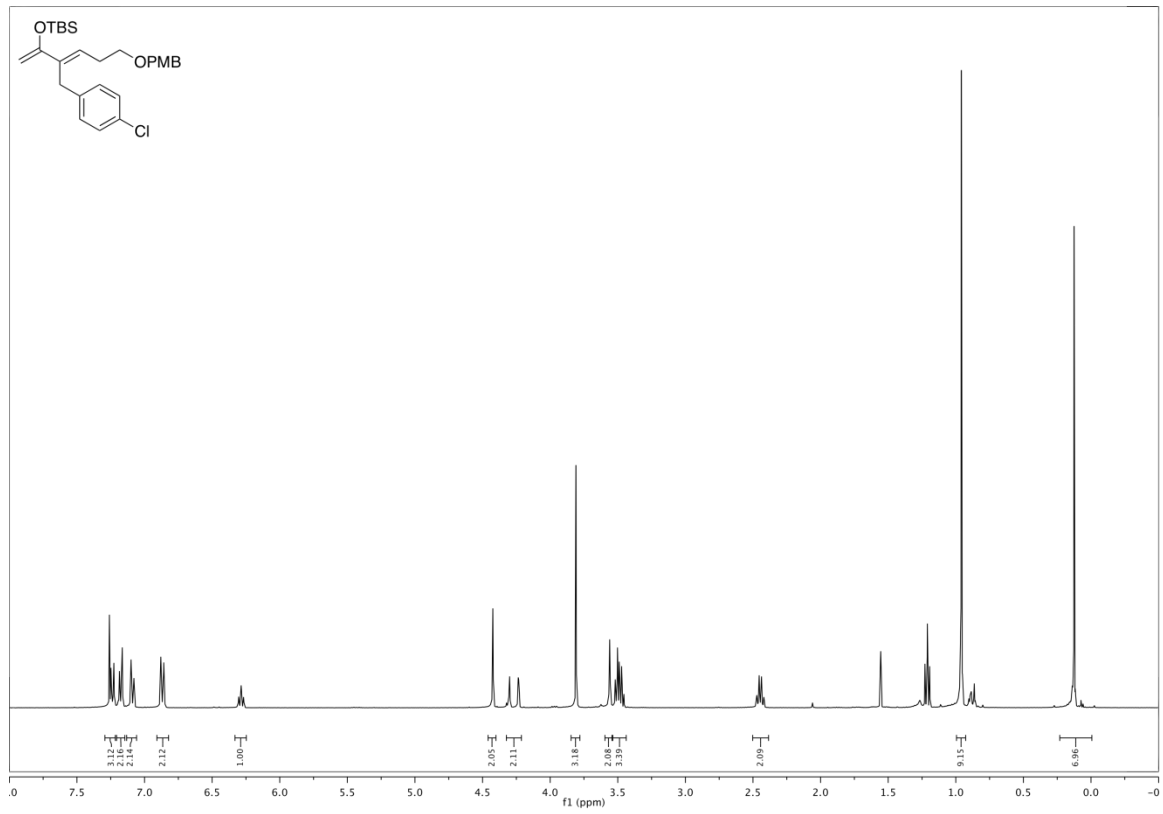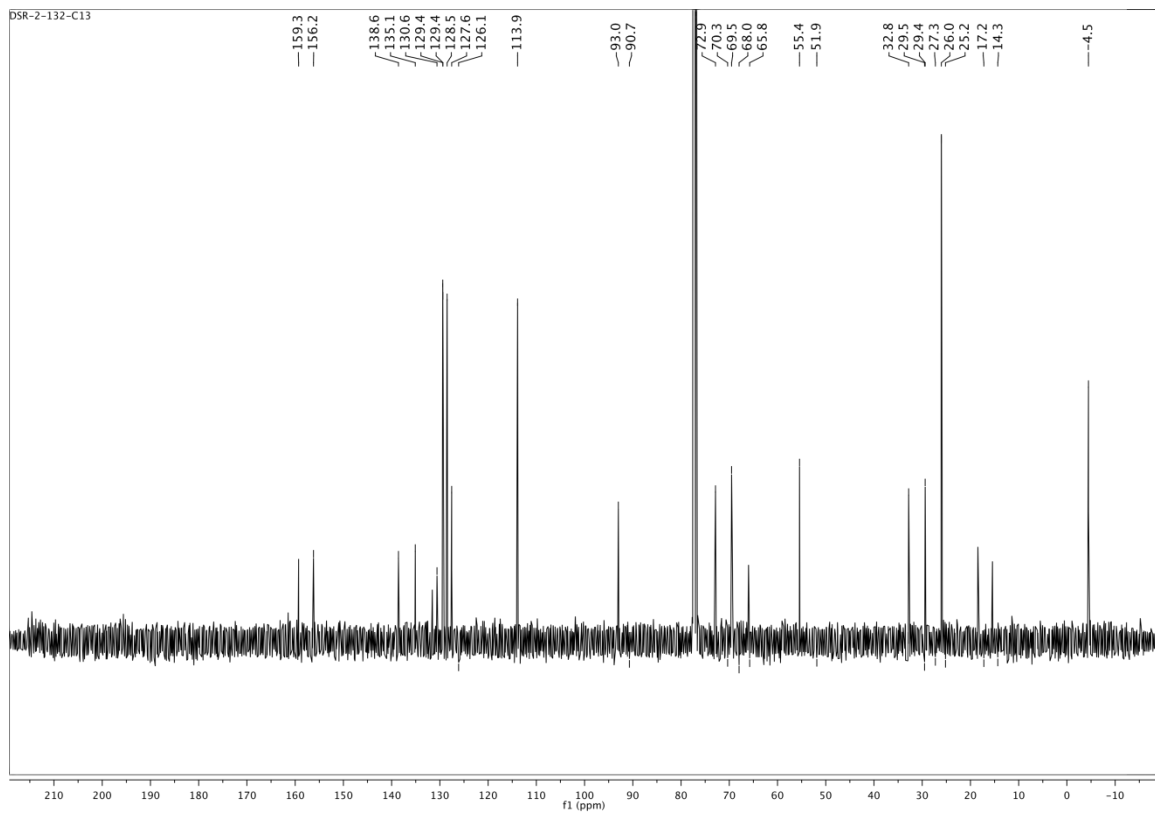

Silyloxydiene **22d**

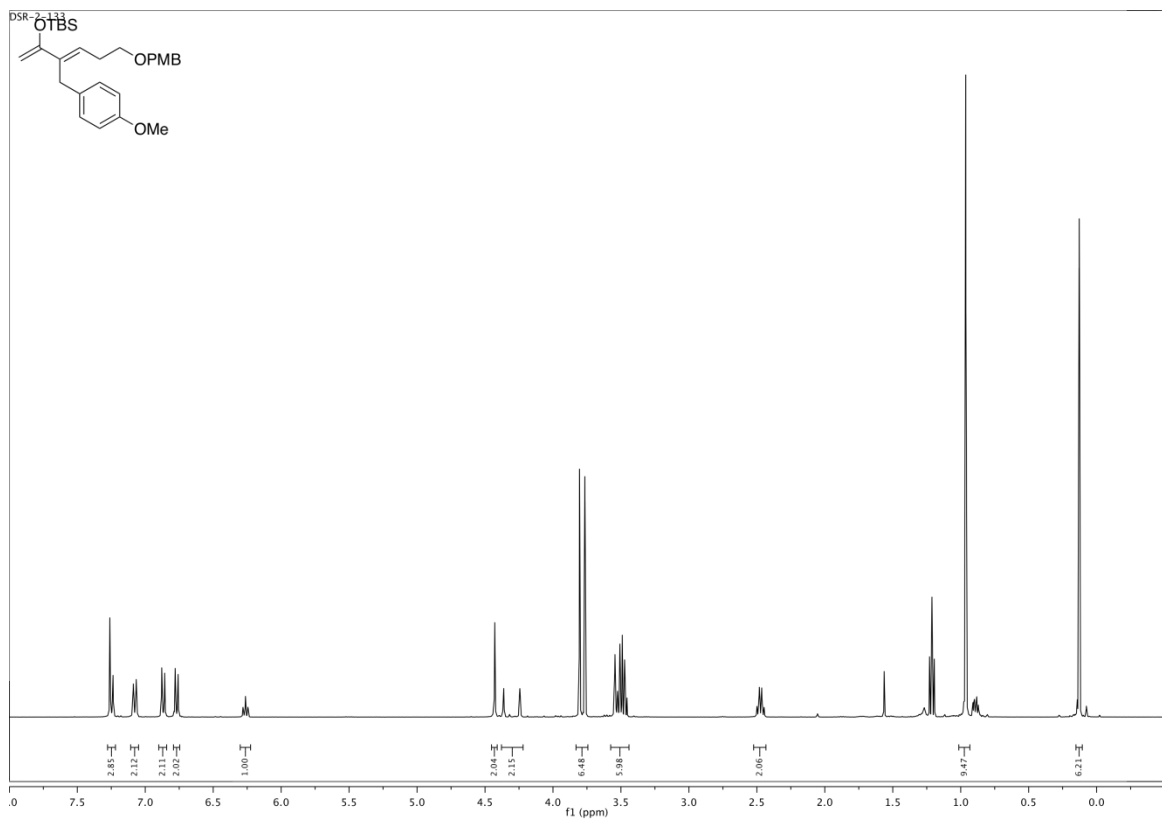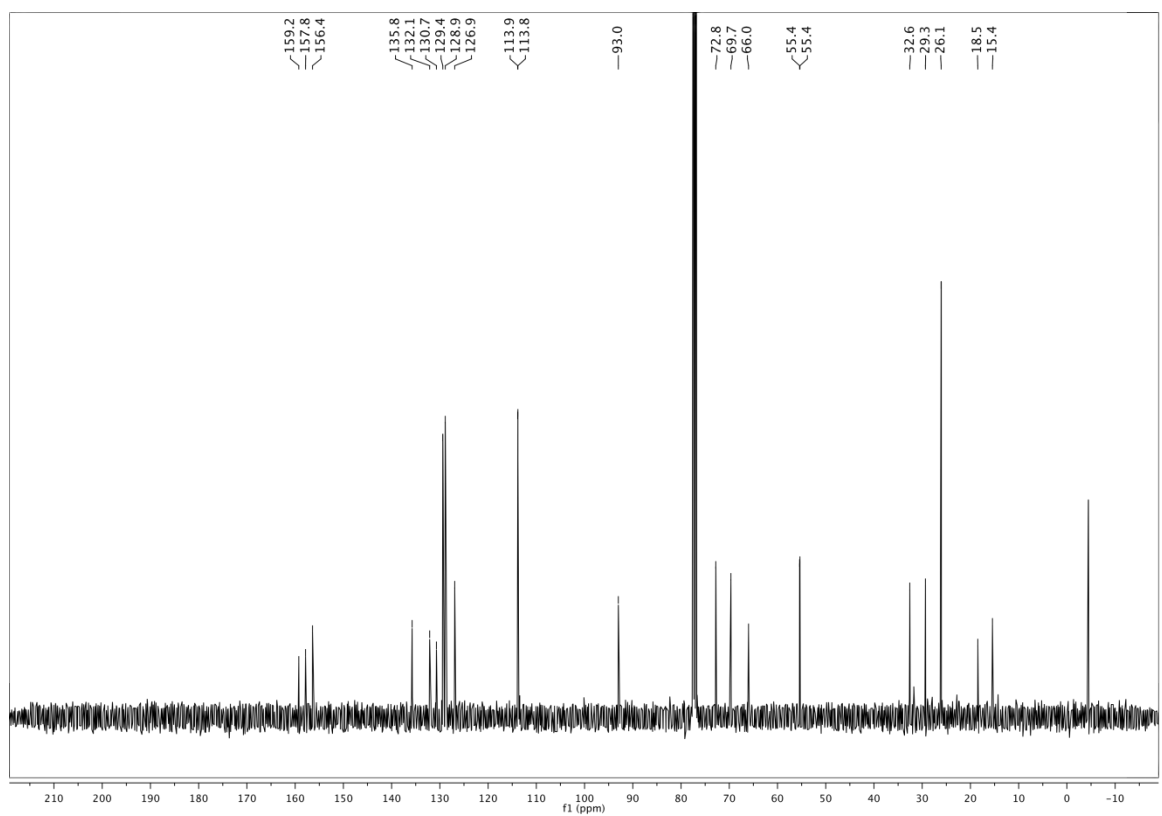

# Hydroxy enone S17a

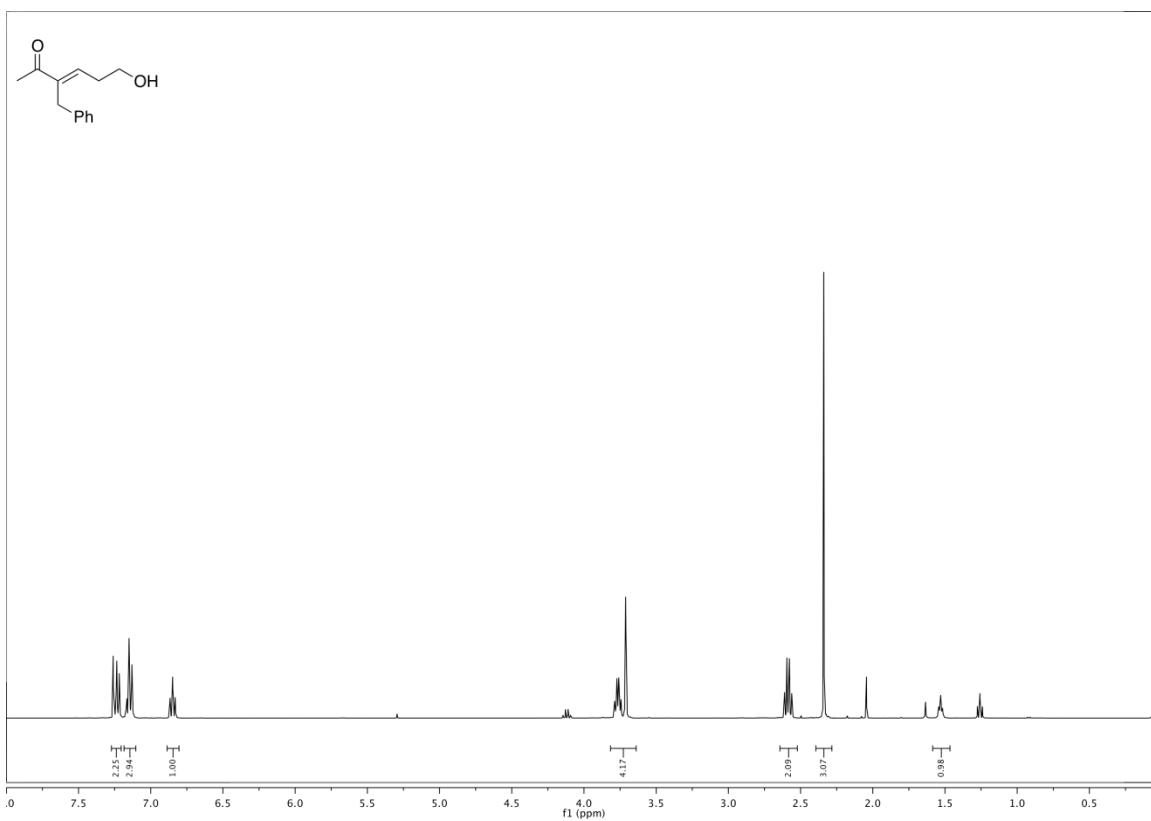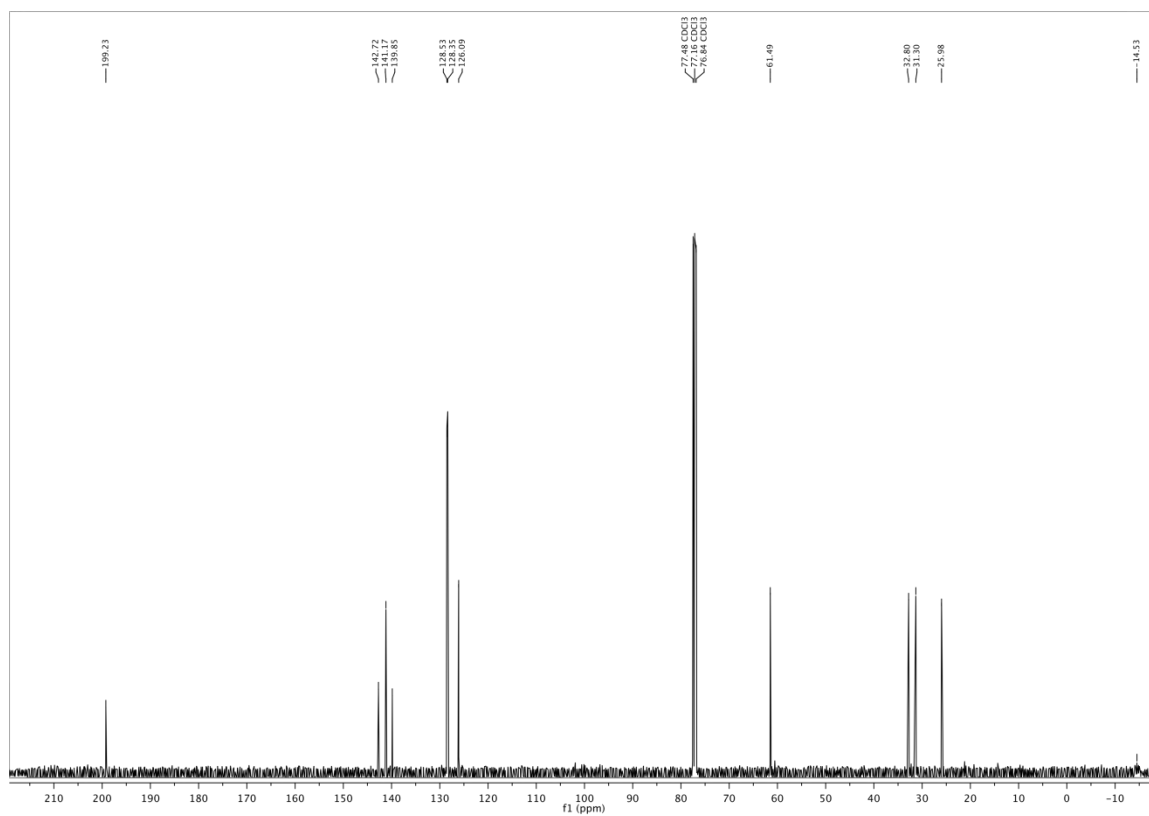

# Hydroxy enone **S17b**

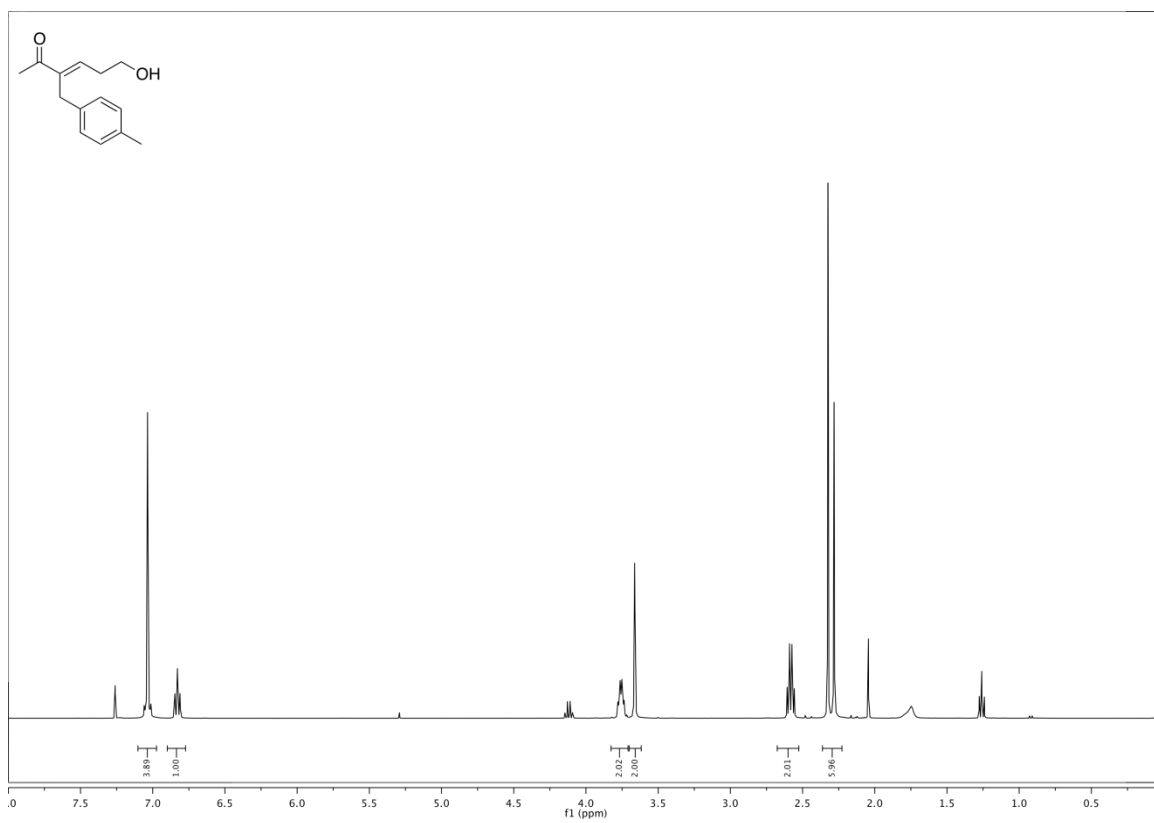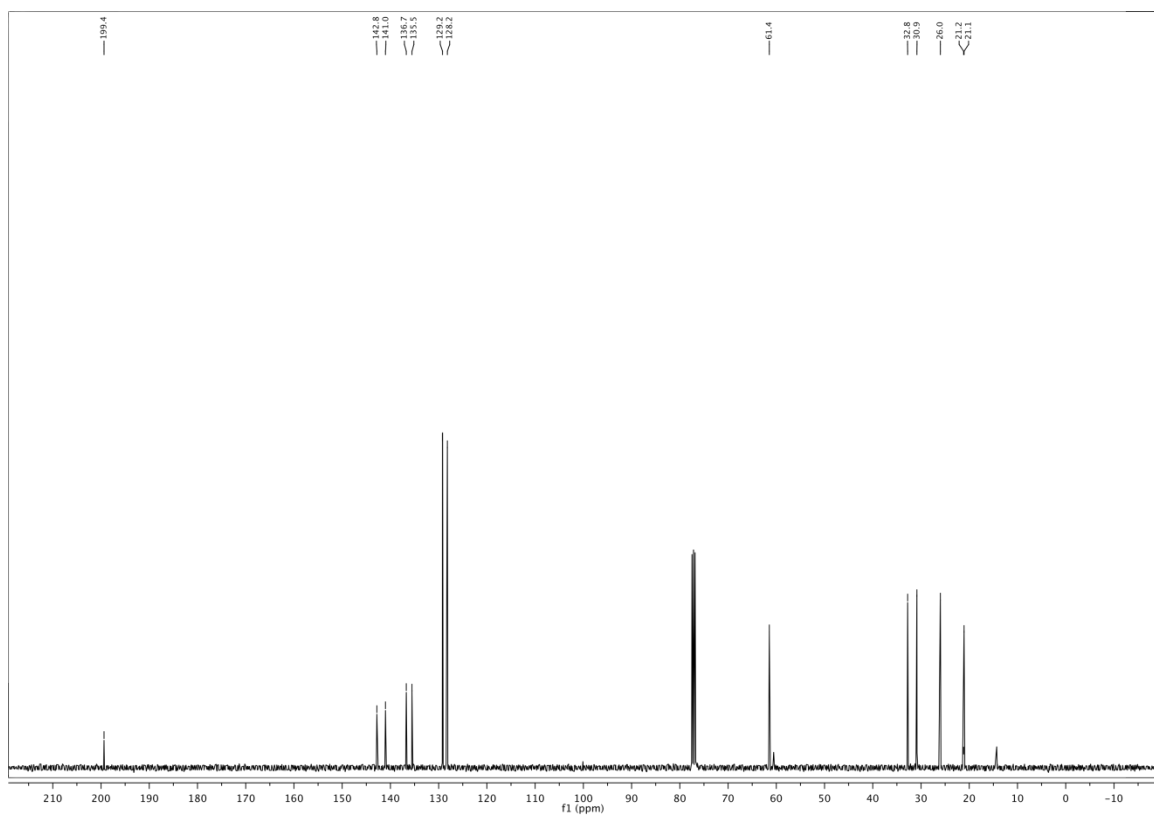

# Hydroxy enone **S17c**

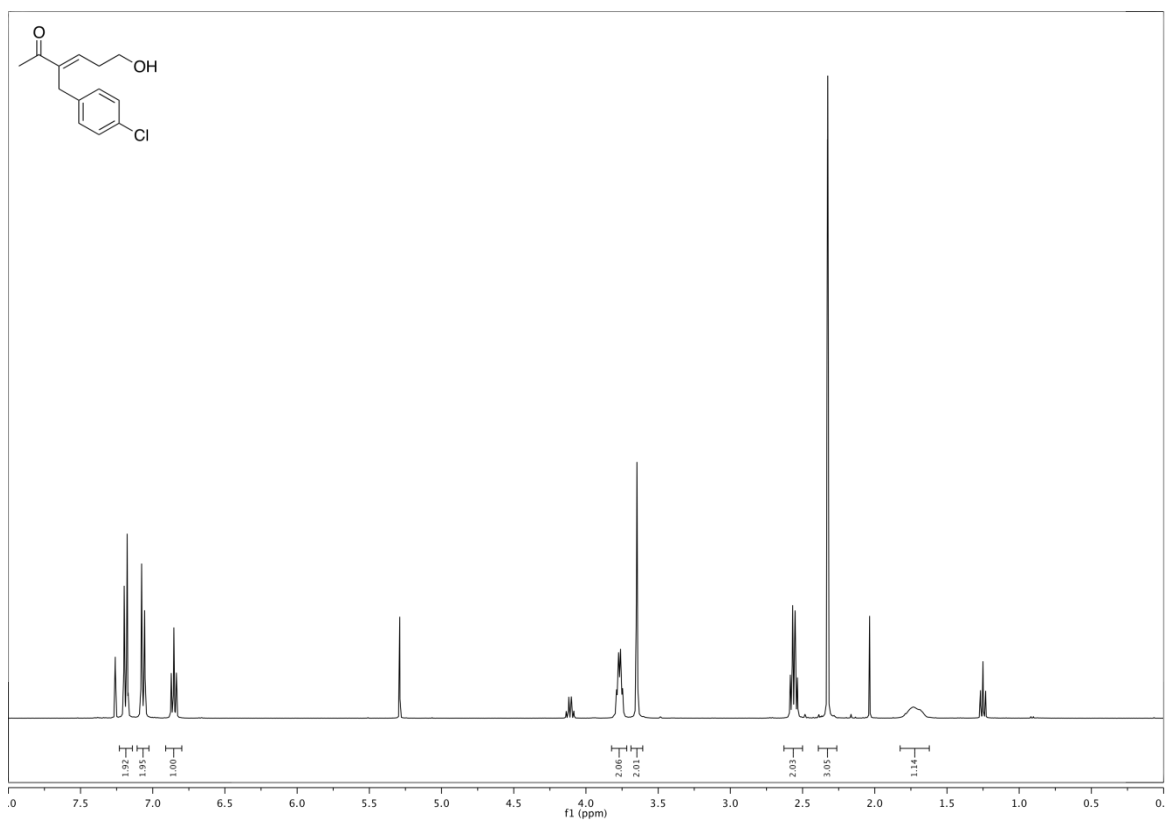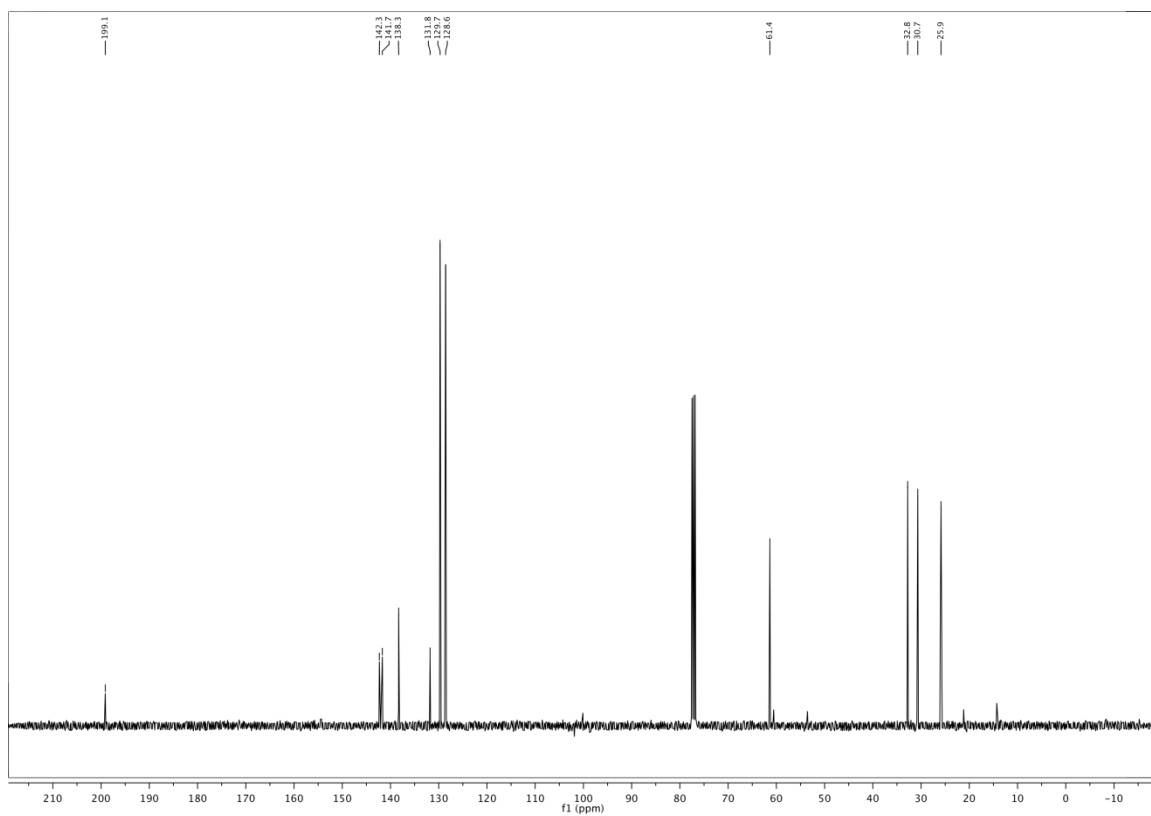

# Hydroxy enone S17d

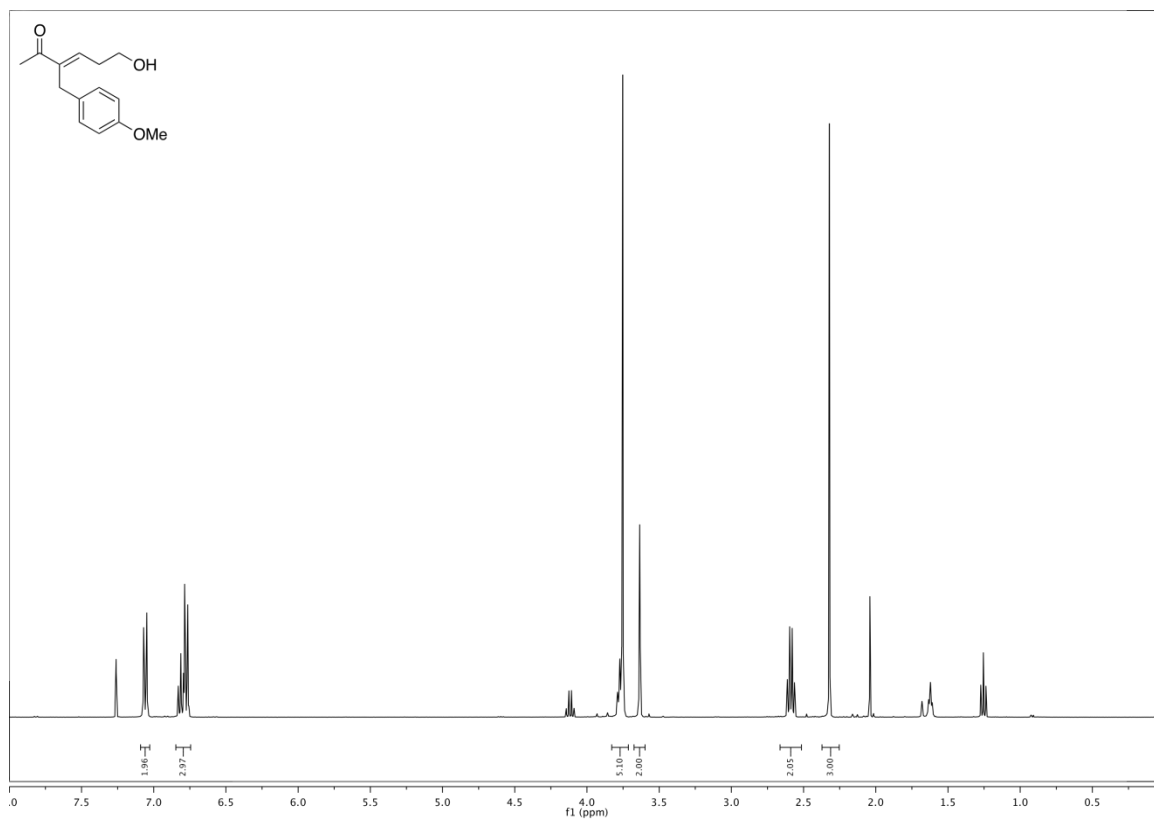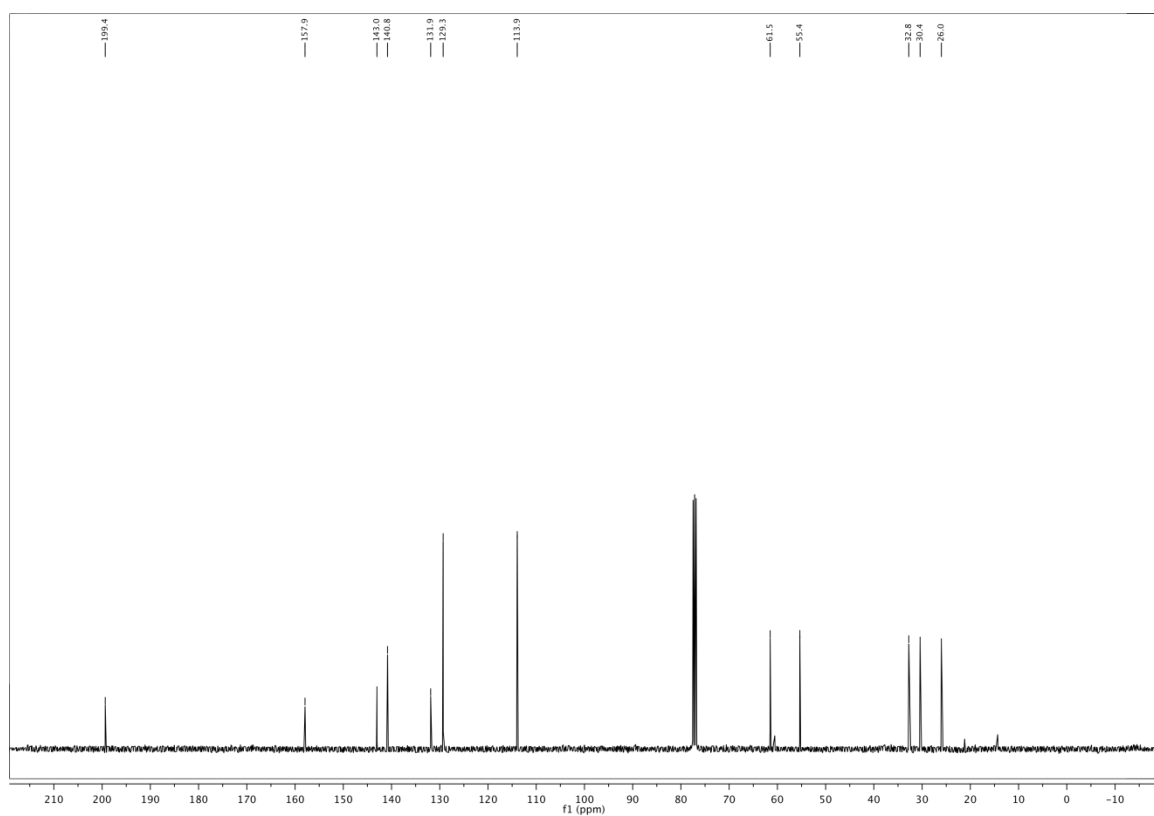

Azidoketone **S18a**

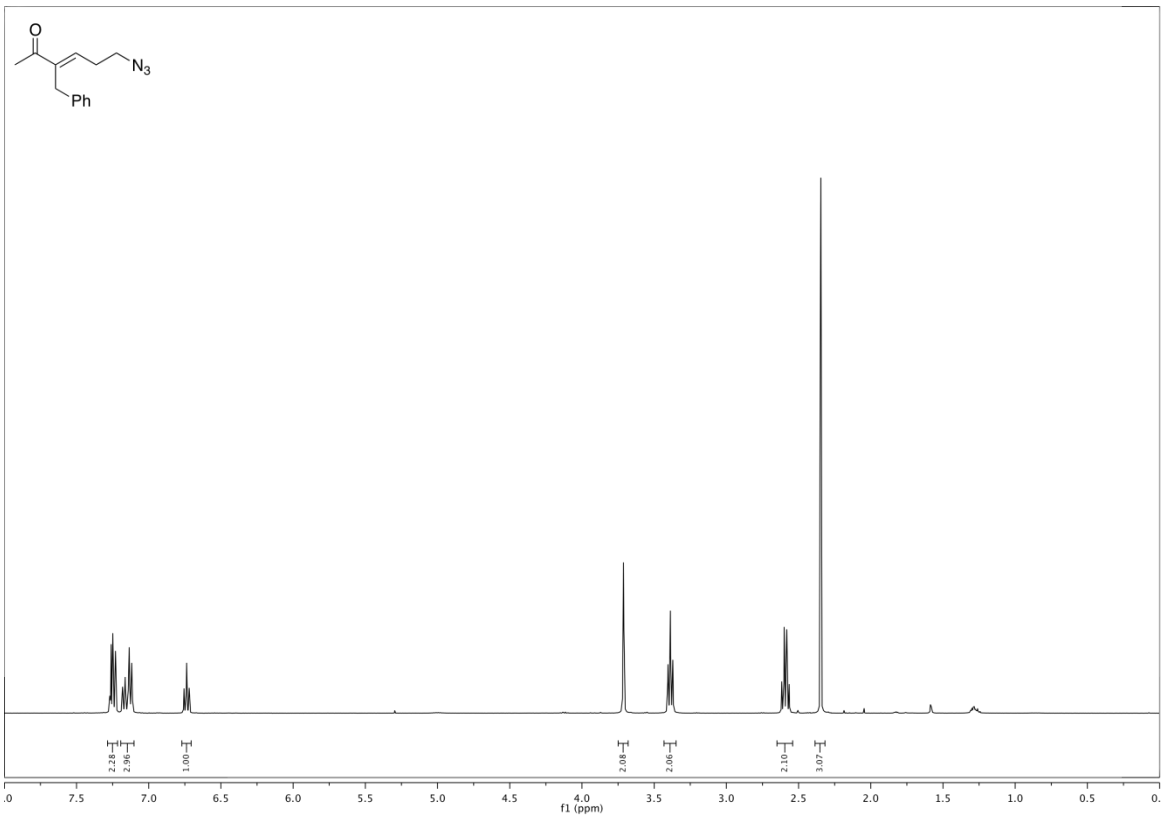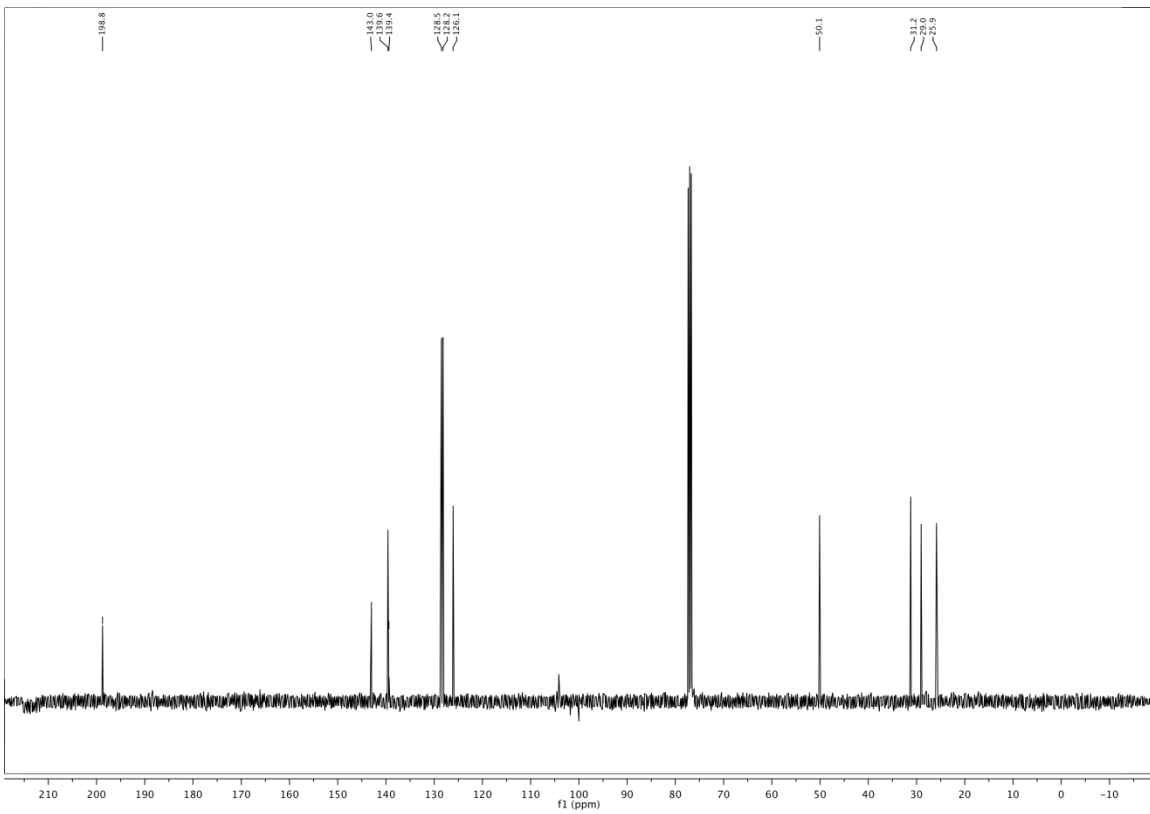

# Azidoketone S18b

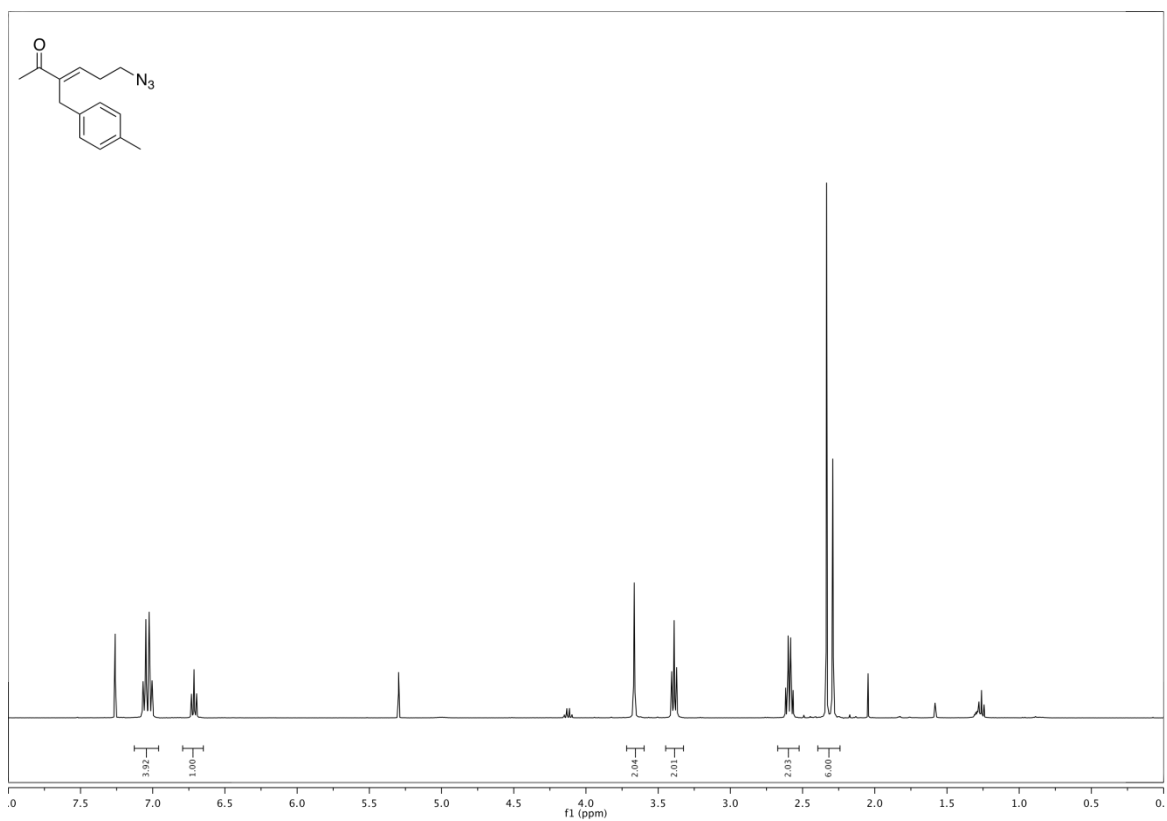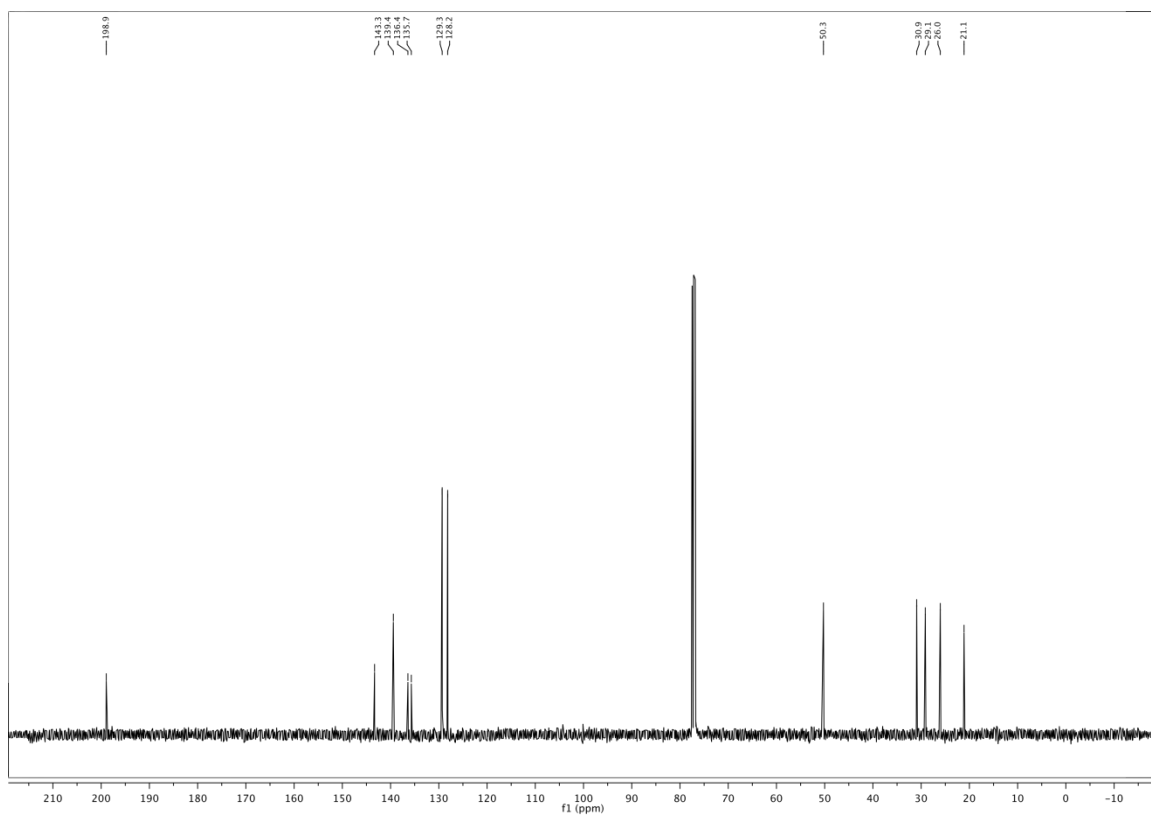



# Azidoketone **S18c**

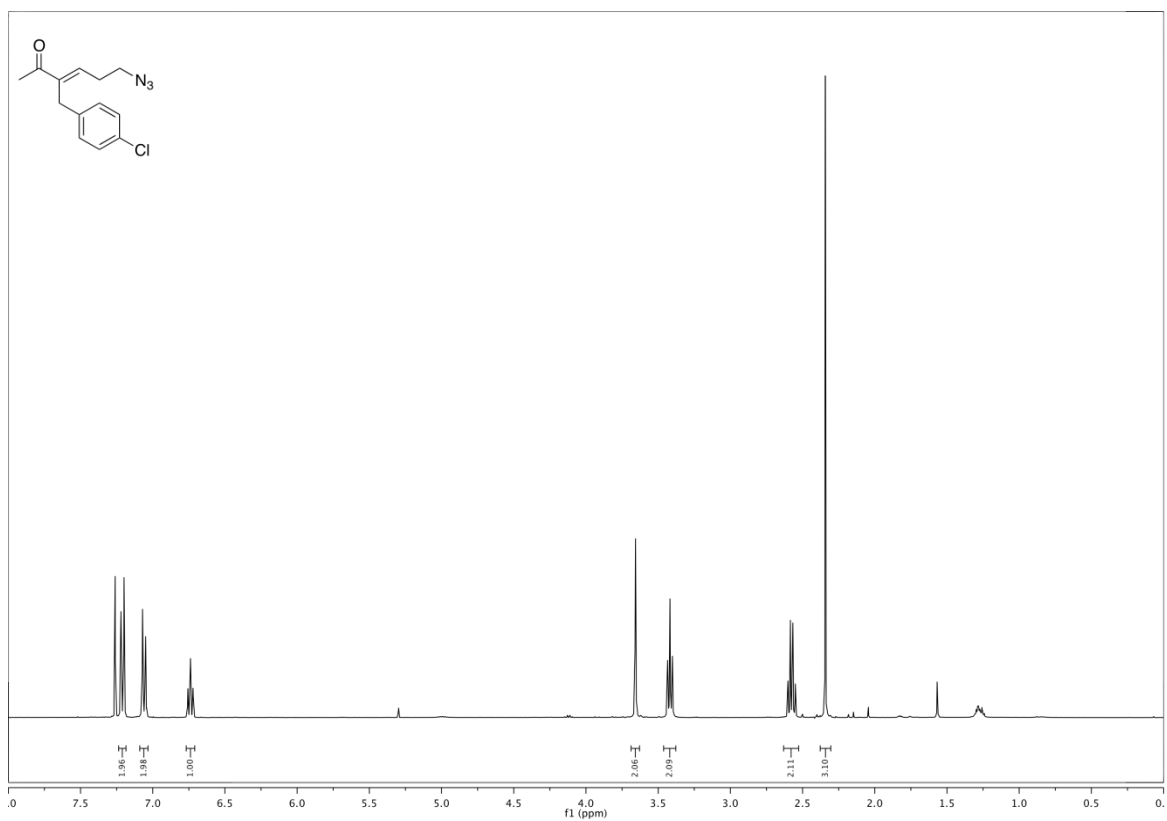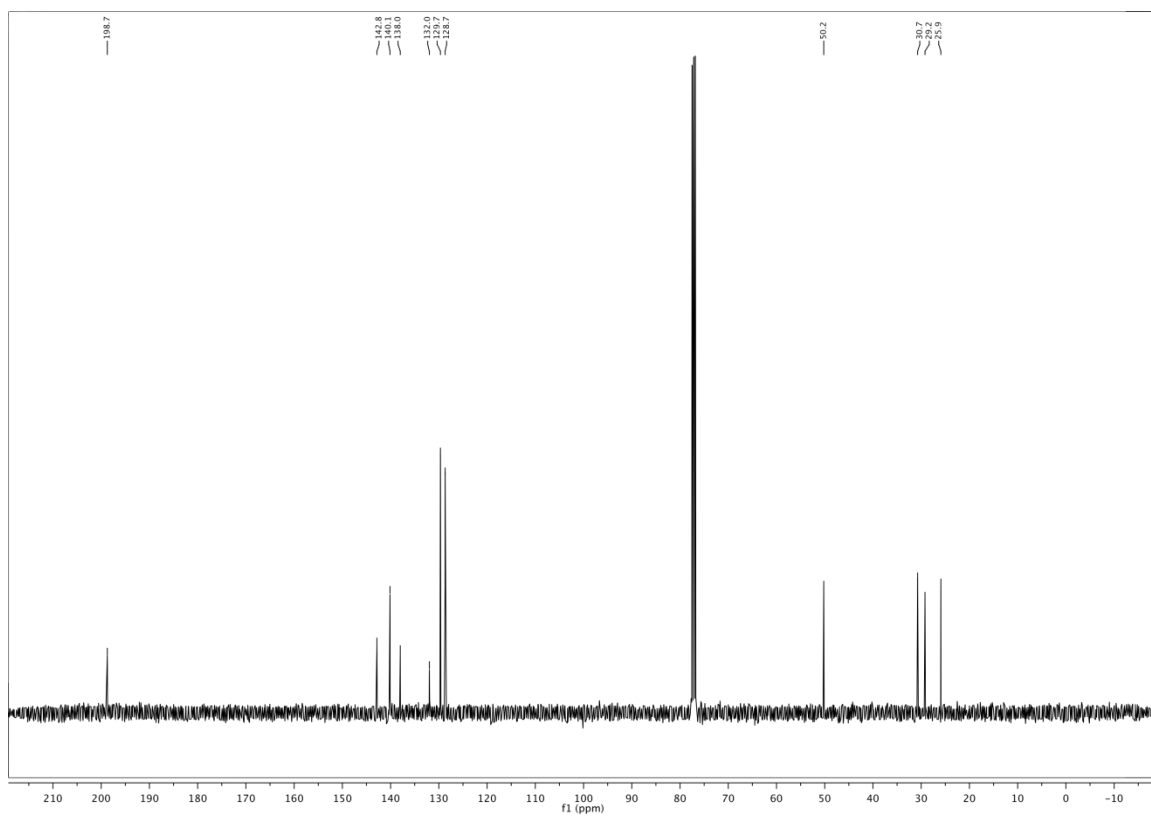

# Azidoketone S18d

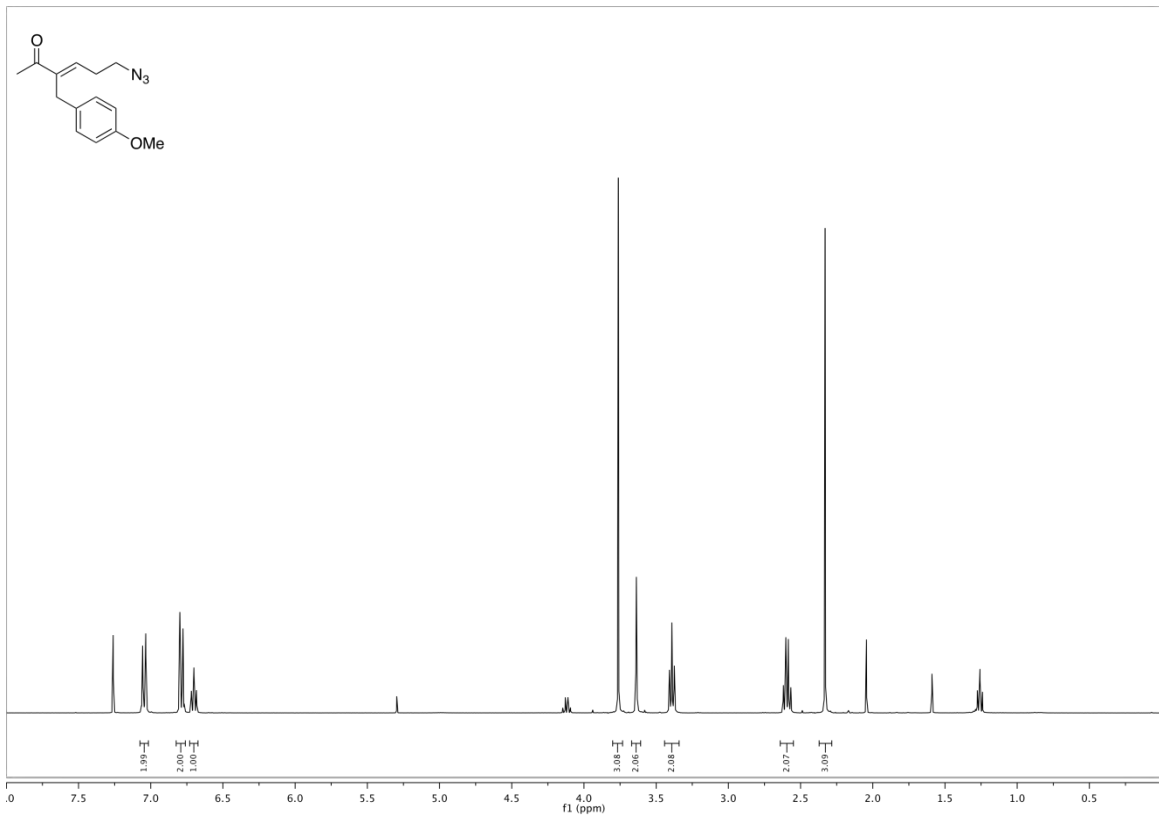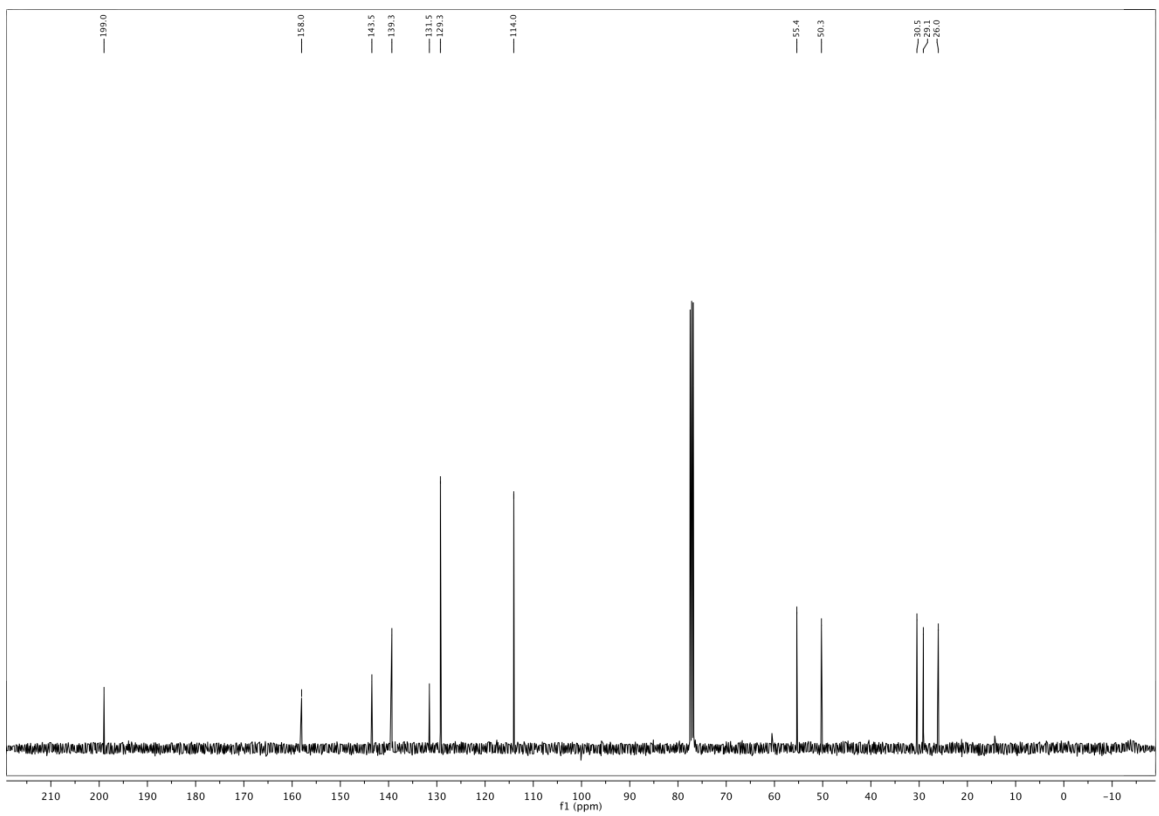

Silyl enol ether **23a**

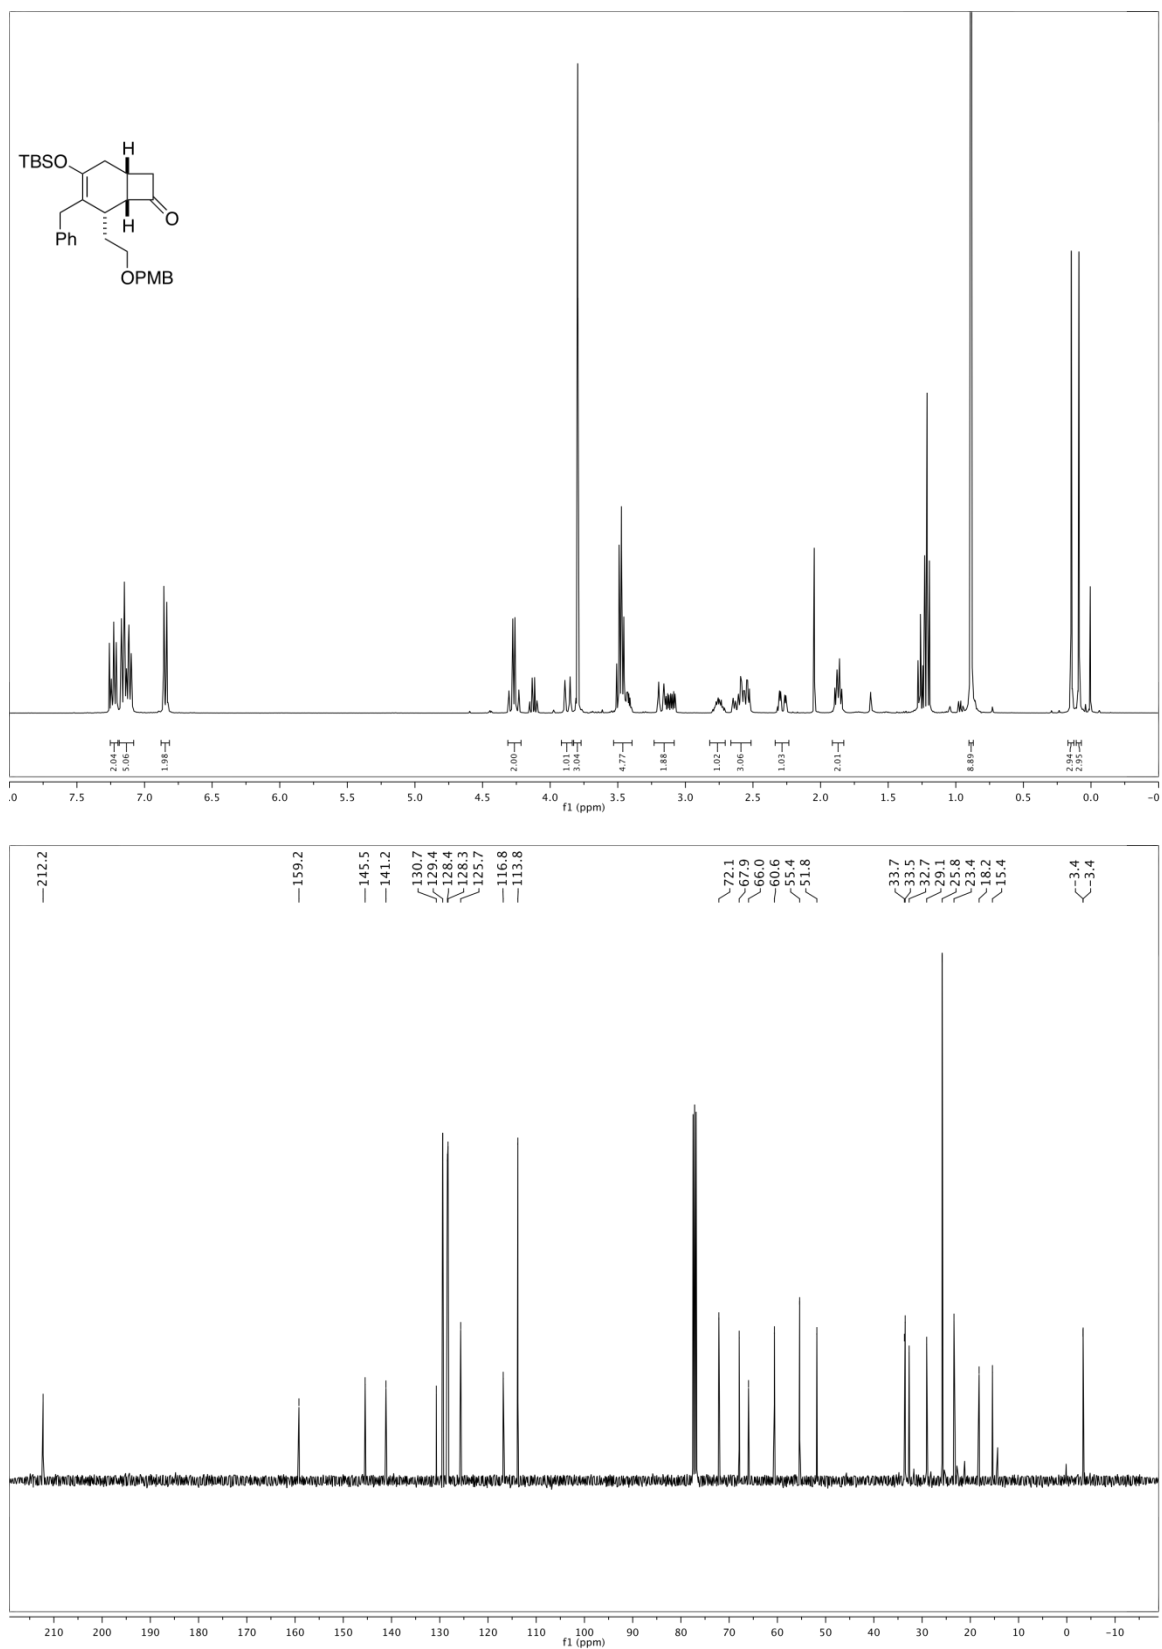

Silyl enol ether **23d**

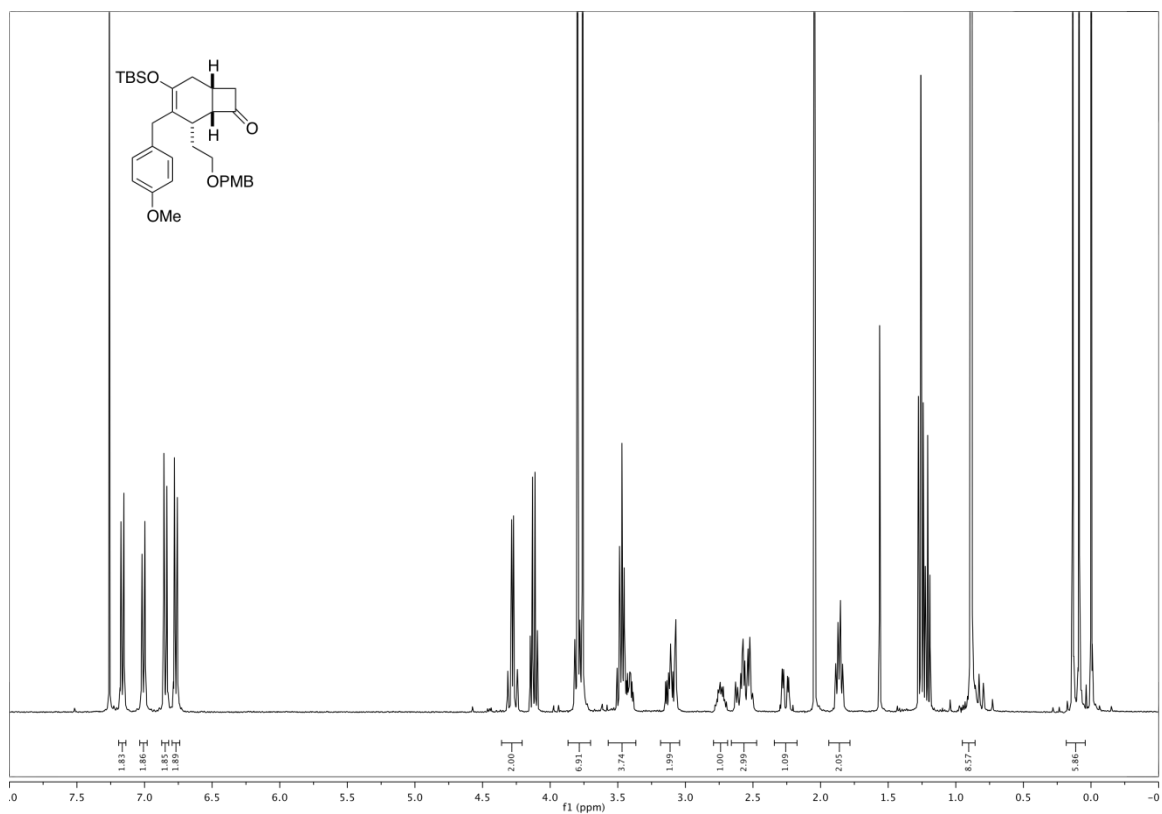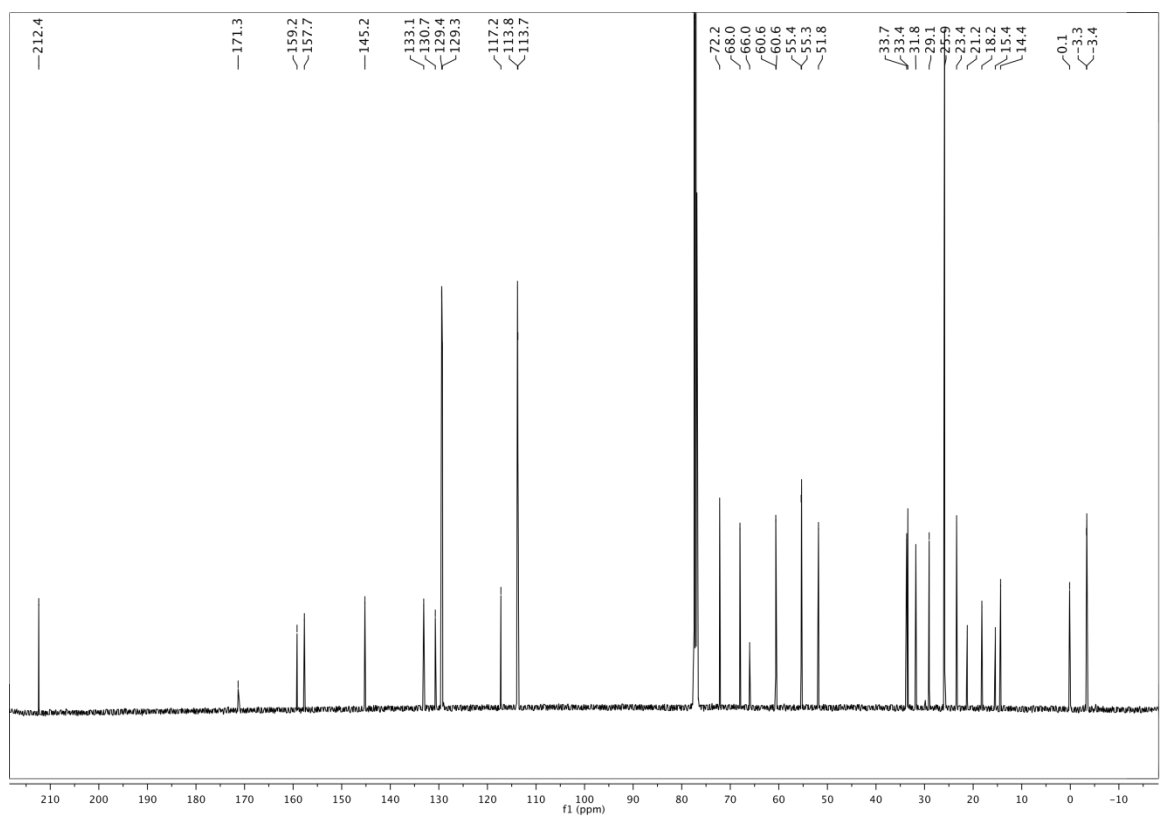



Silyl enol ether **23b**

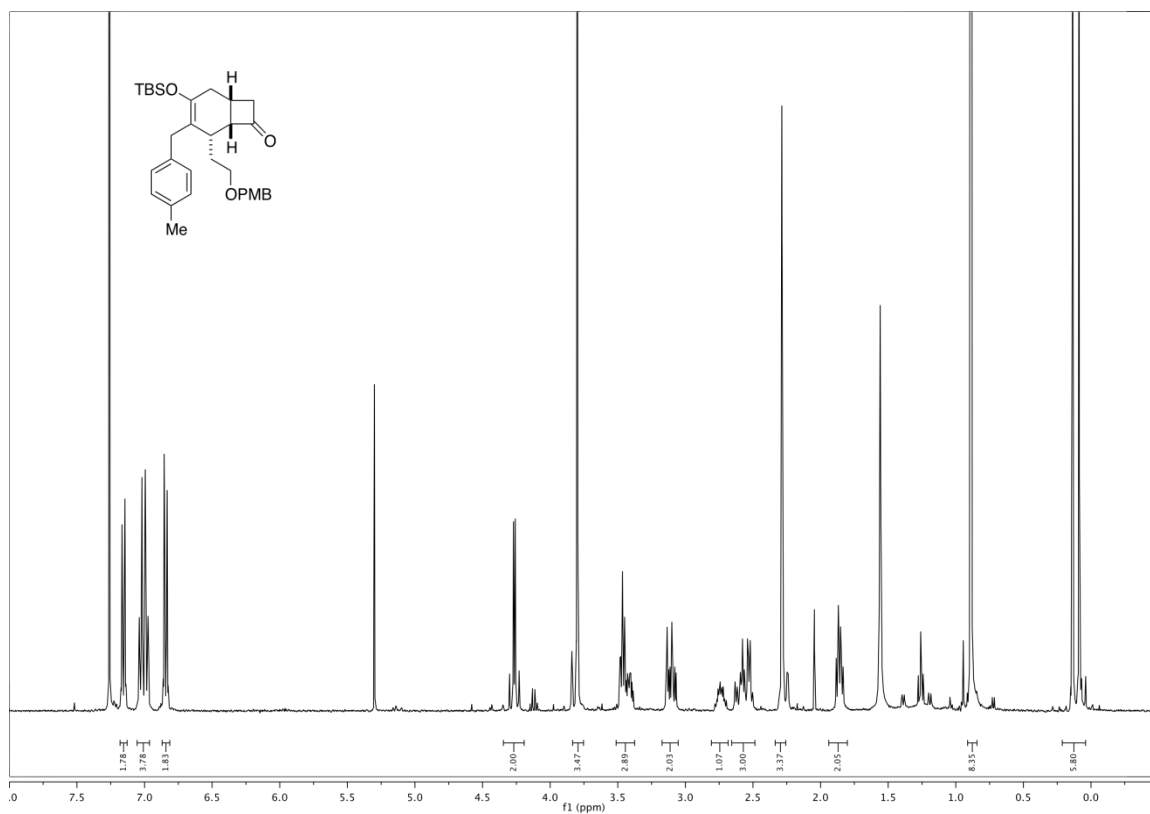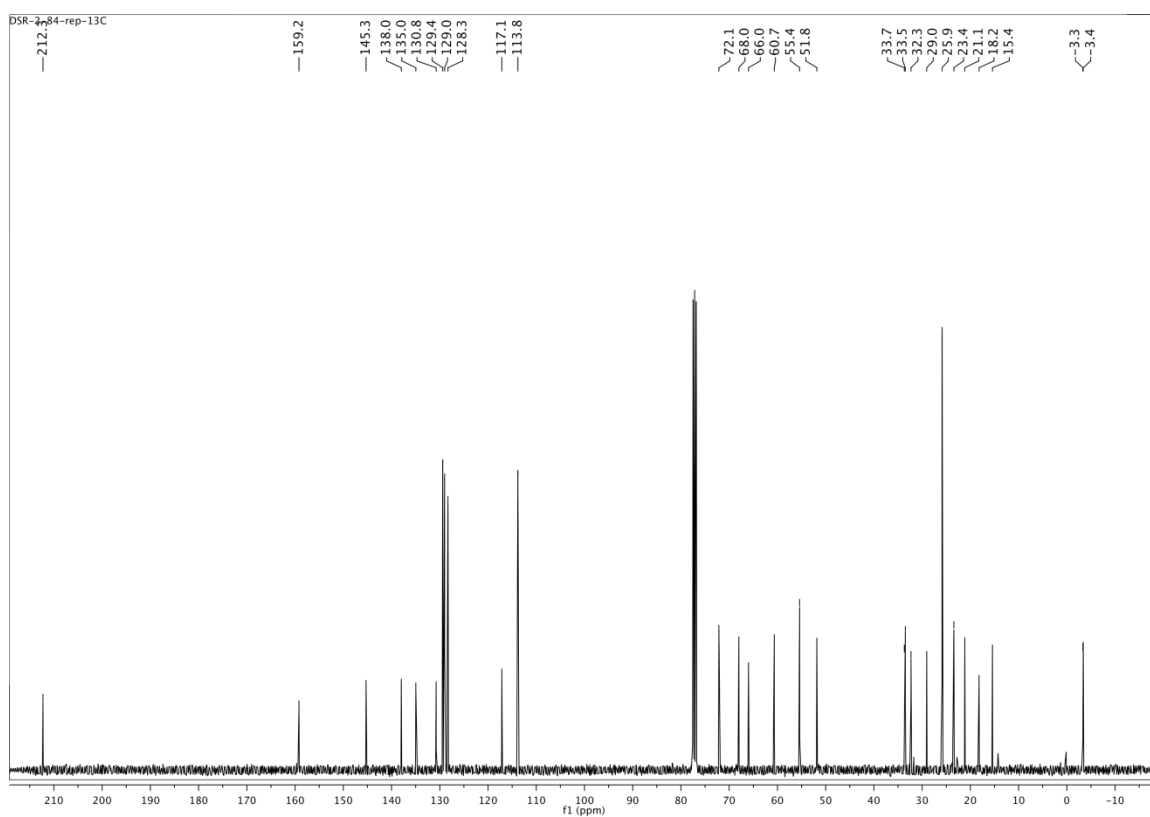

# Tetrahydroisochromenone **24a**

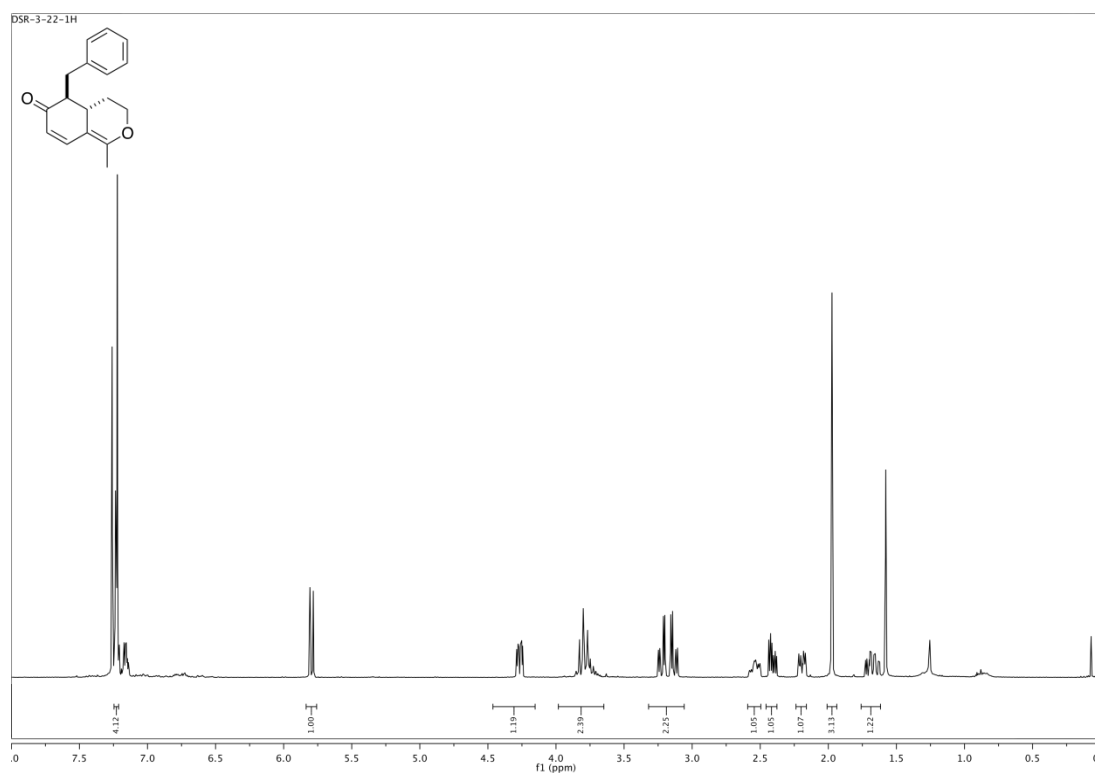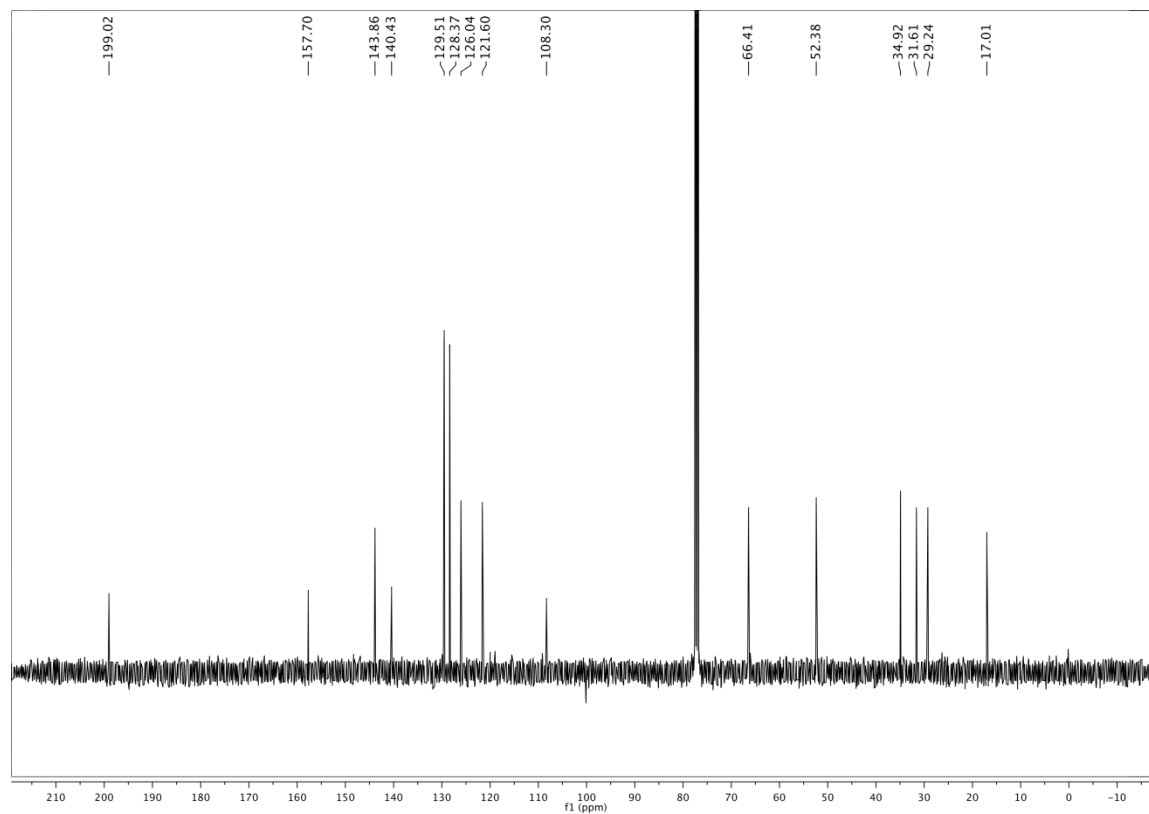

# Tetrahydroisochromenone **24d**

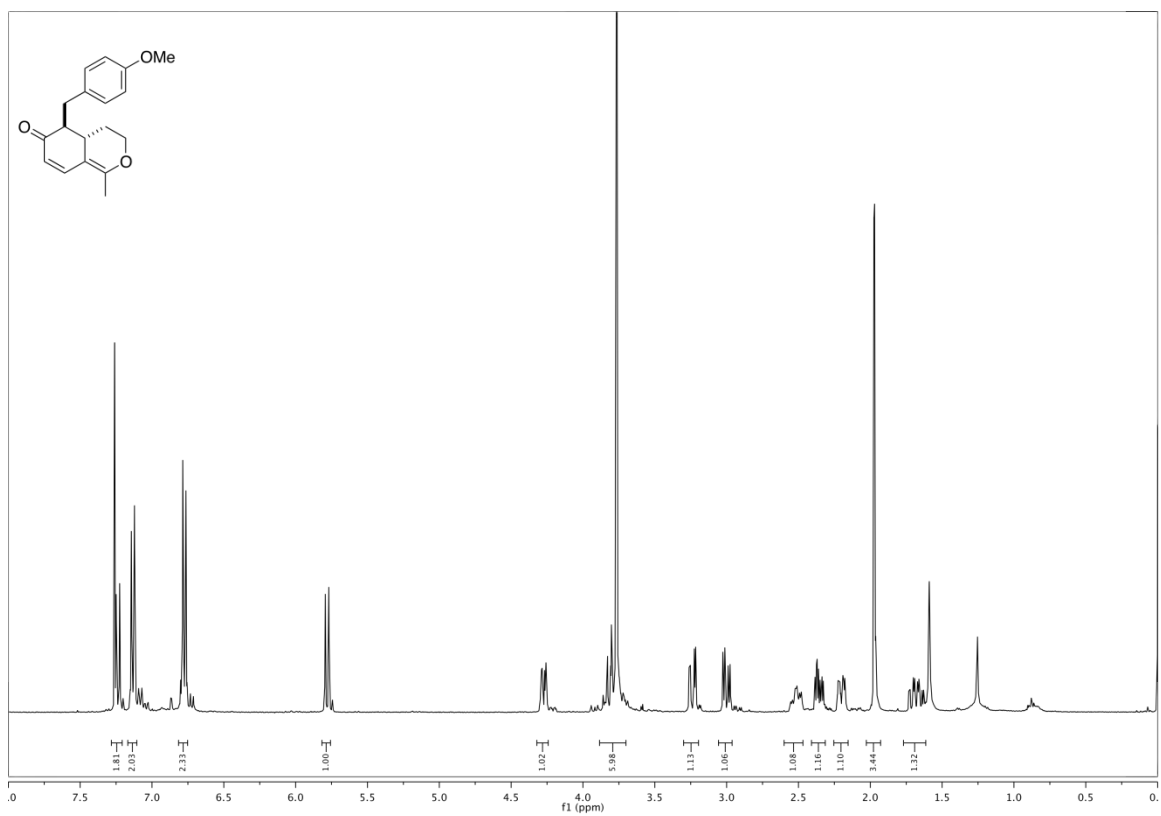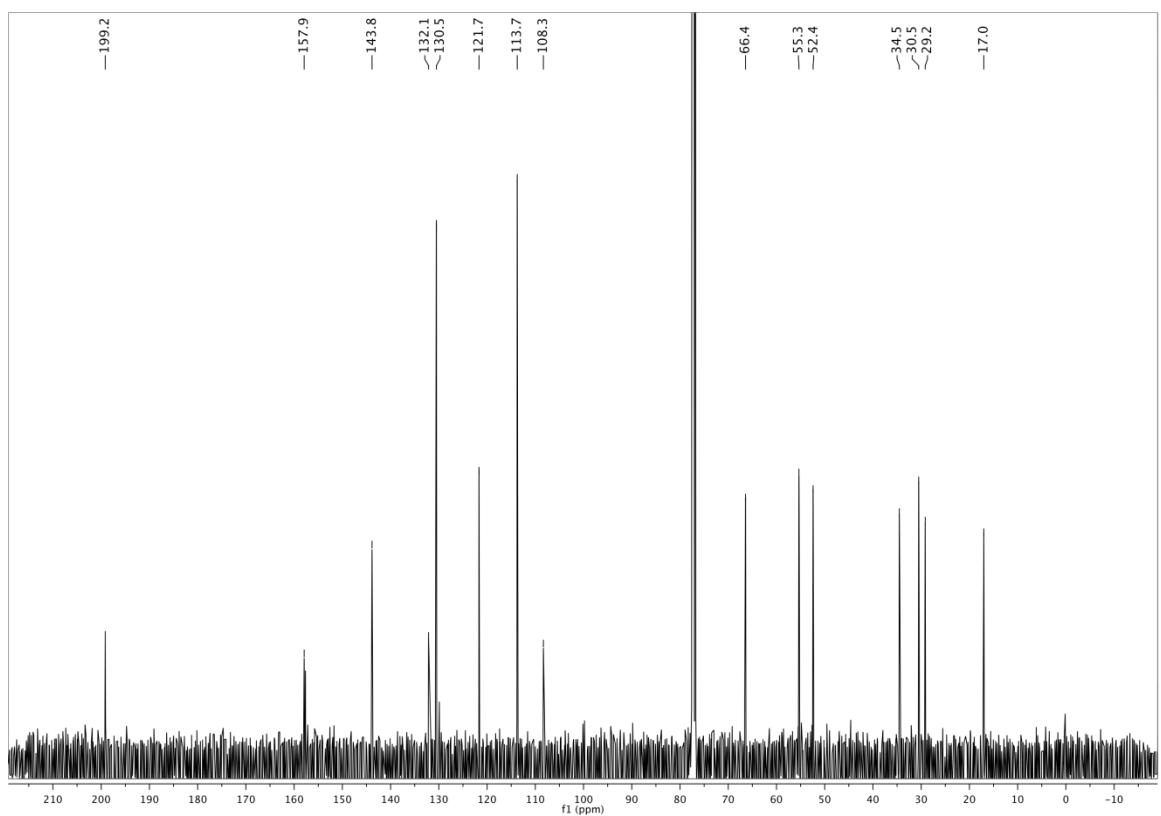



# Tetrahydroisochromenone **24c**

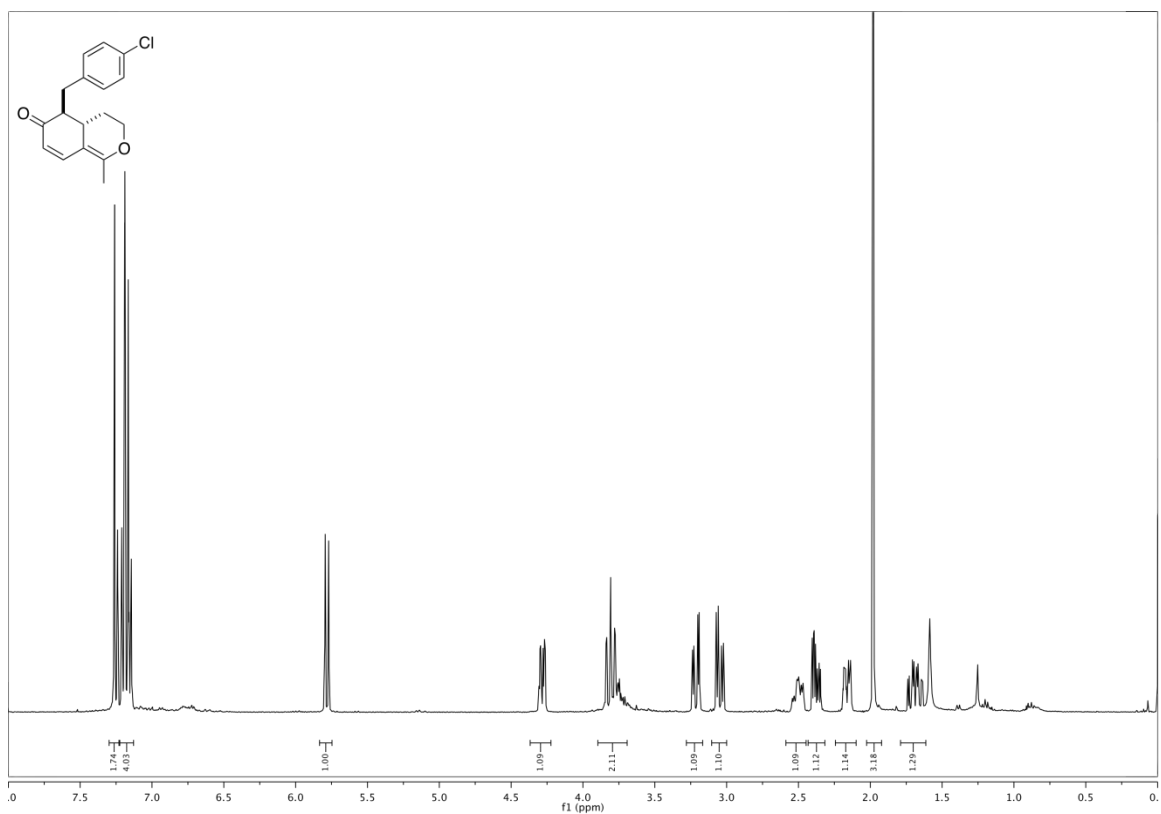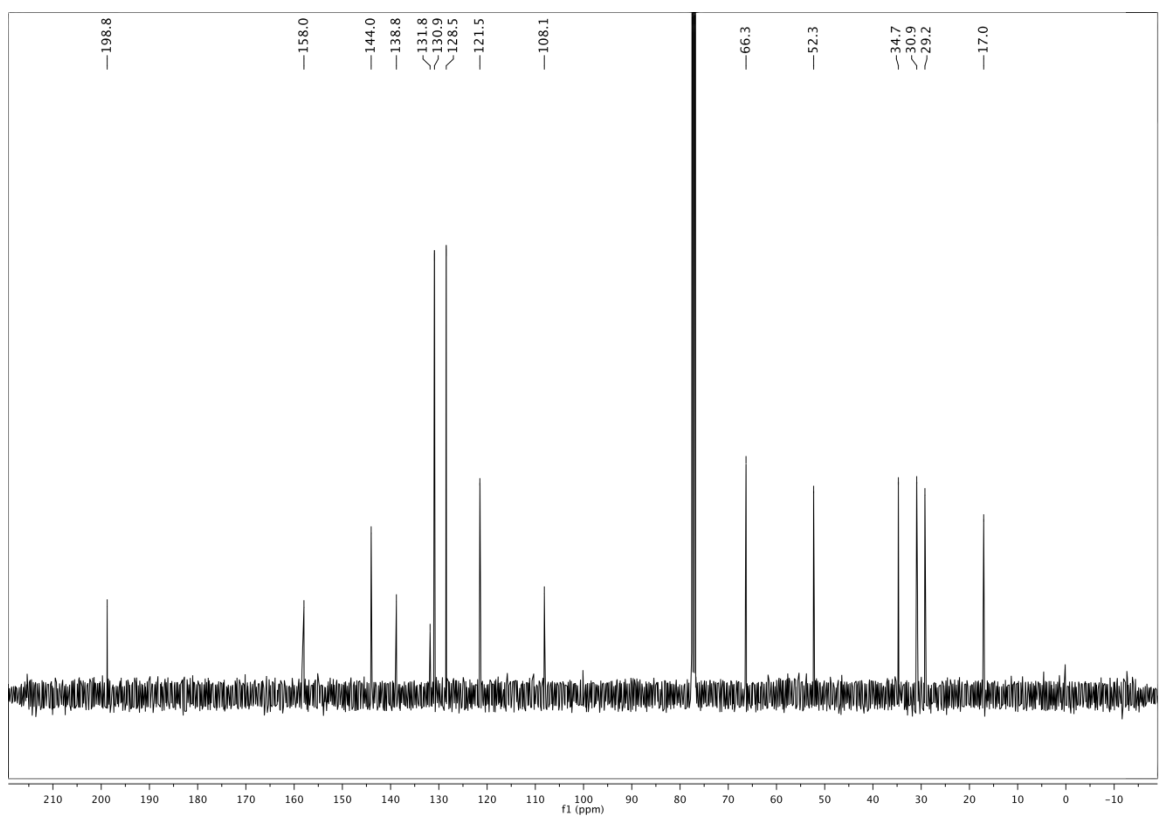

# Tetrahydroisochromenone **24b**

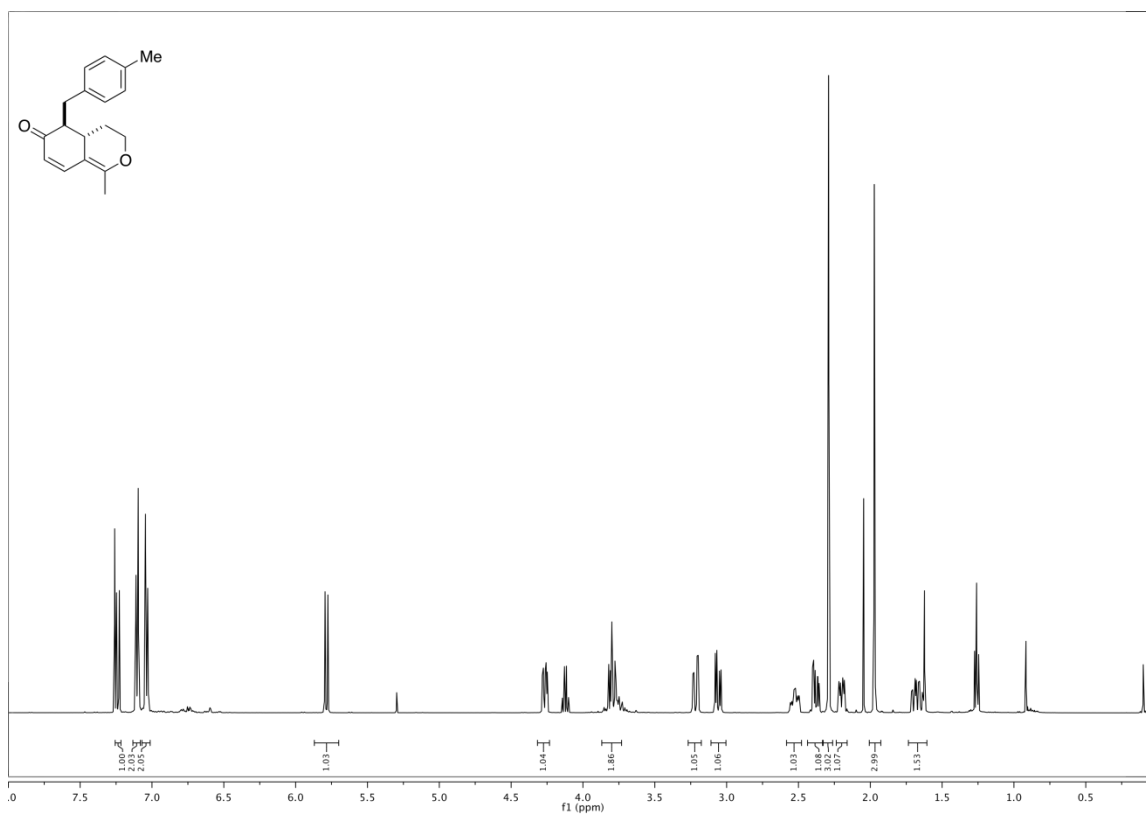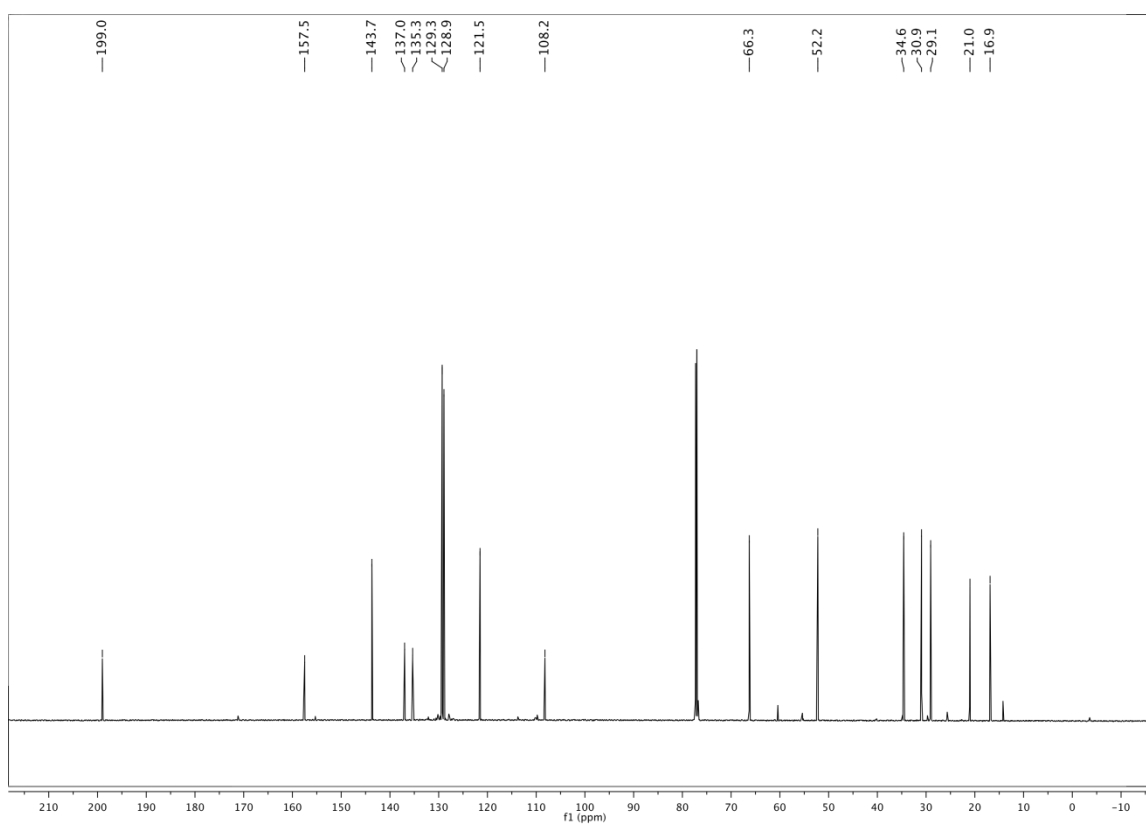

# Amide 18a

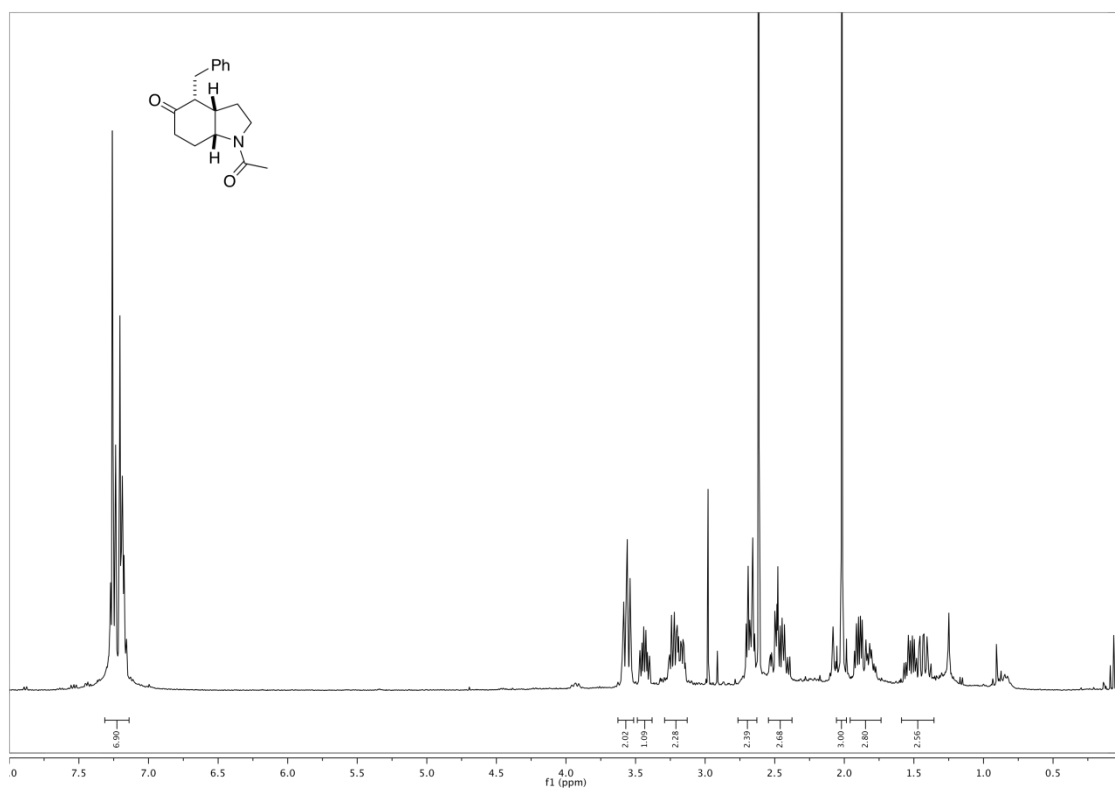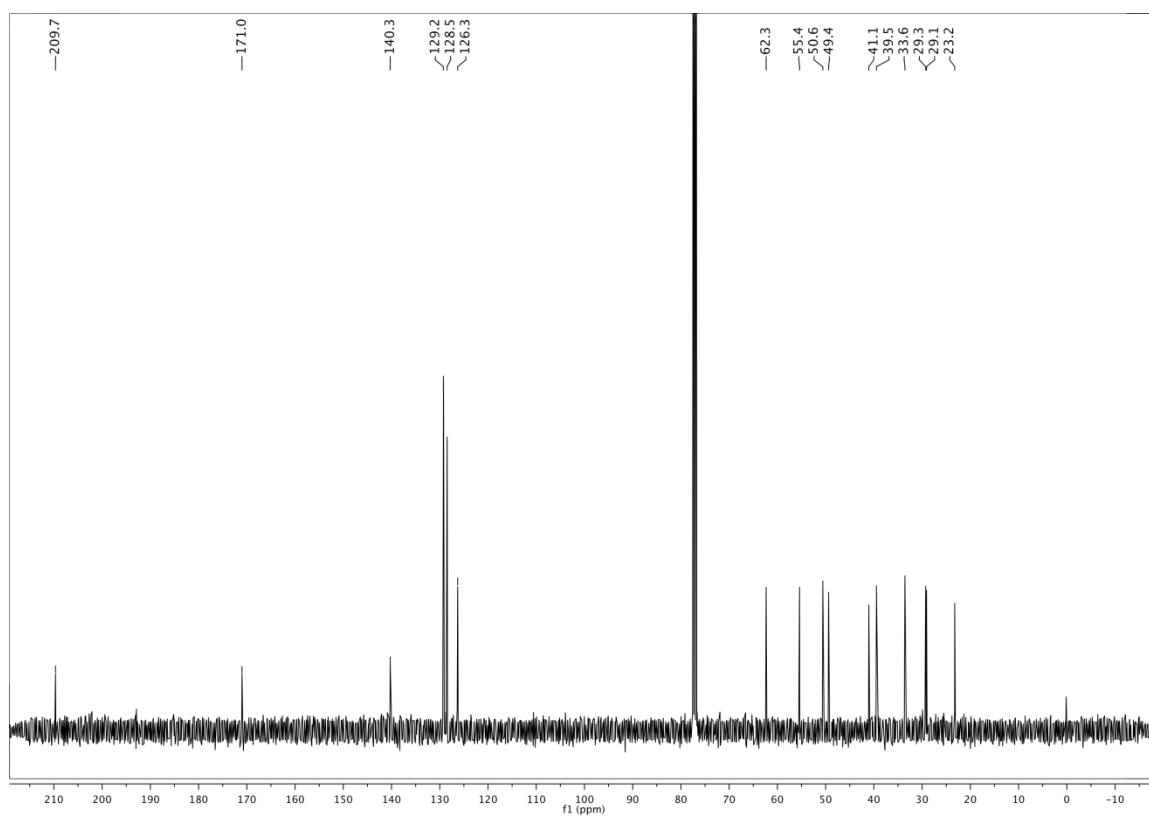

# Amide 18d

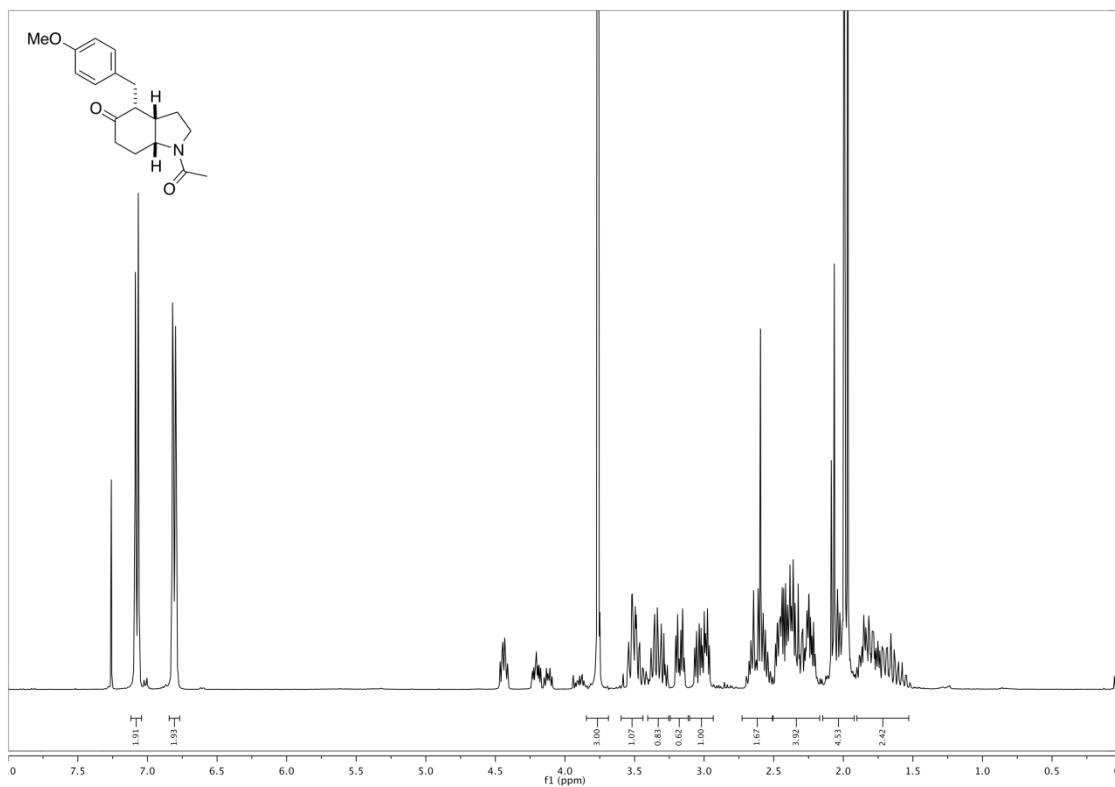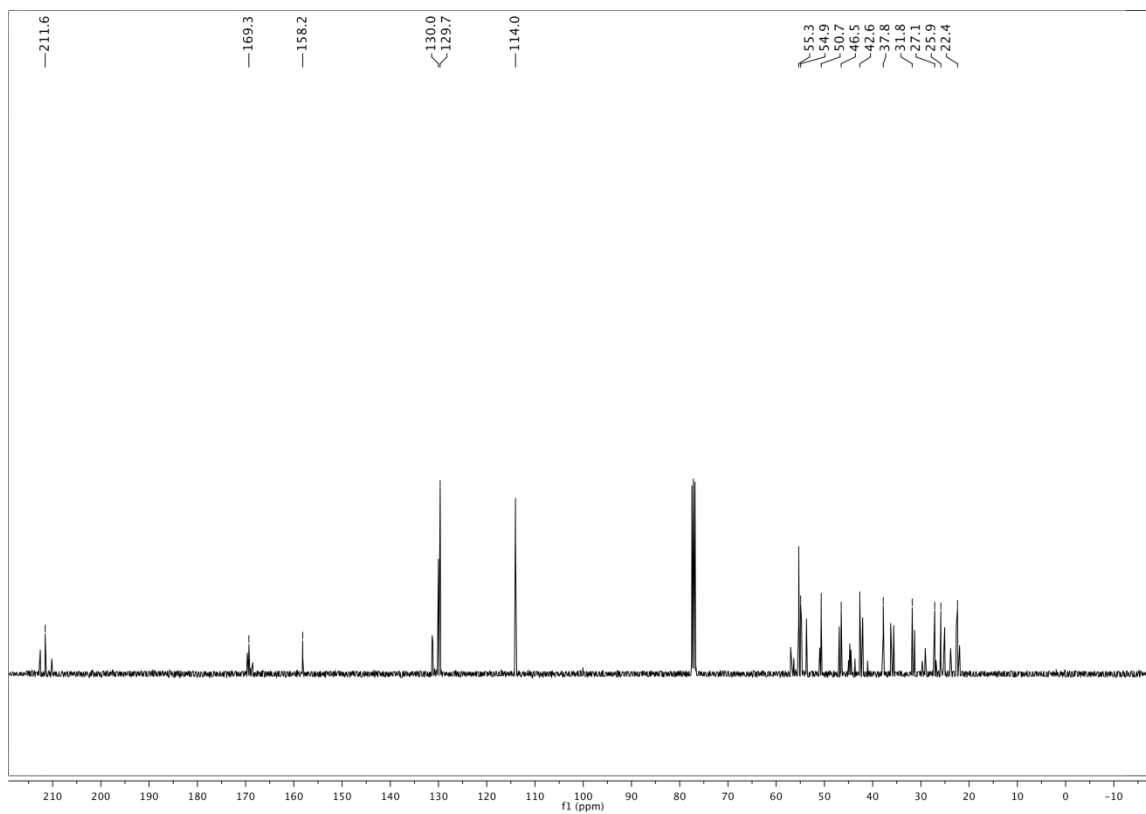

Amide 18c

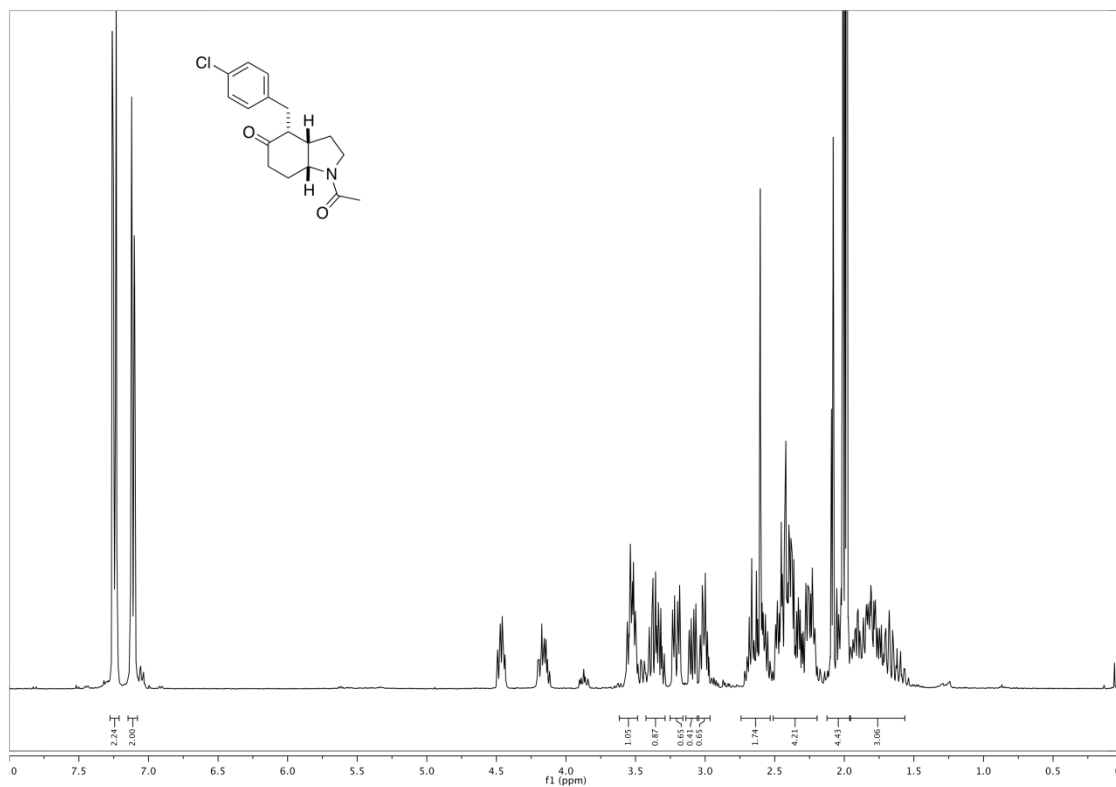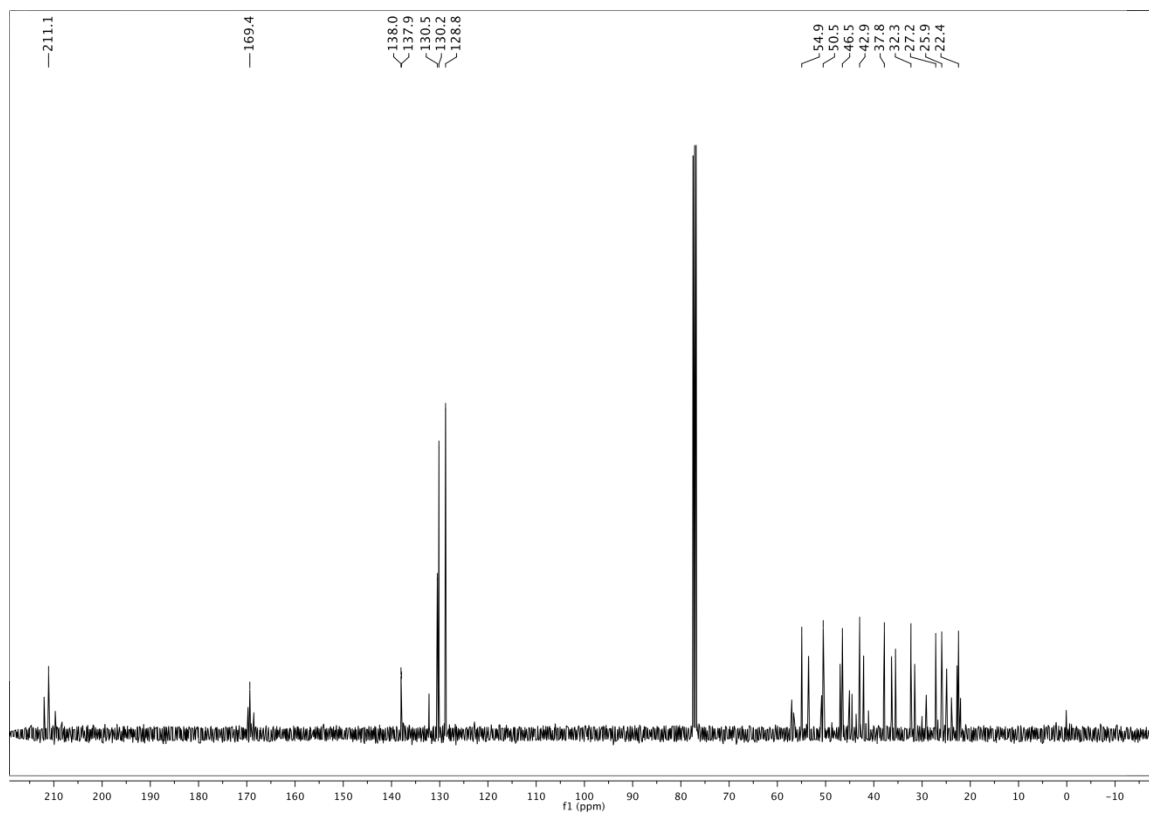

# Amide 18b

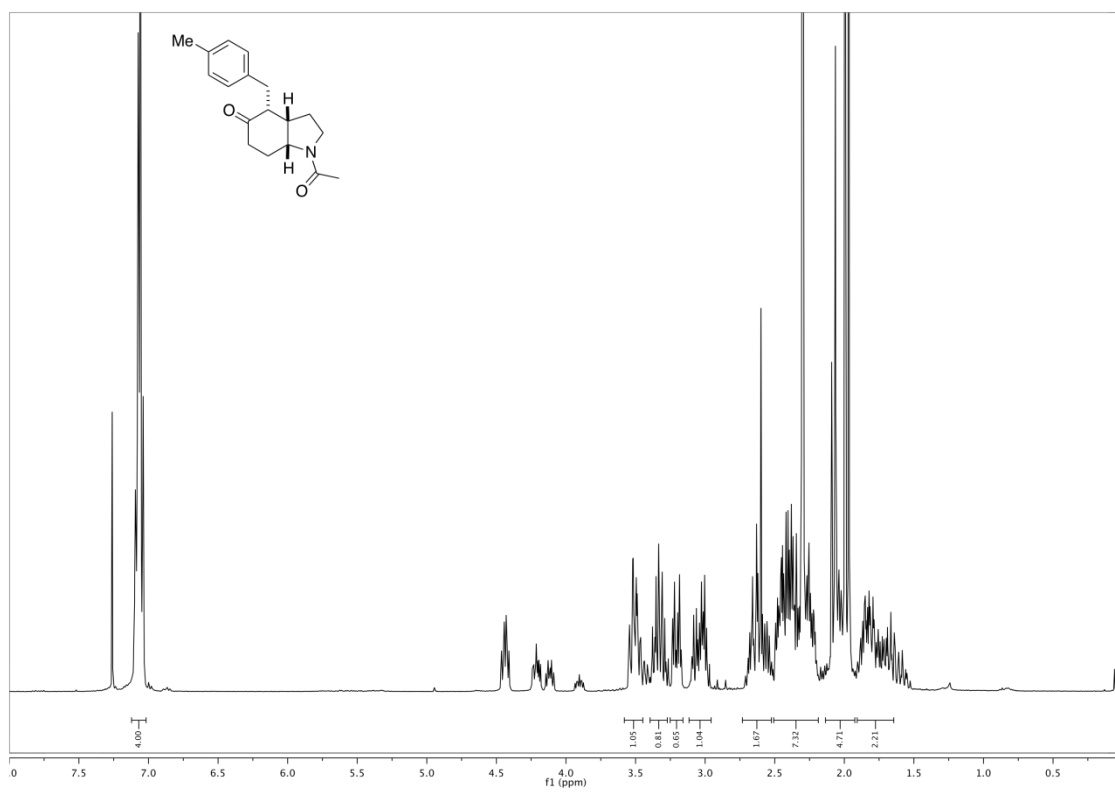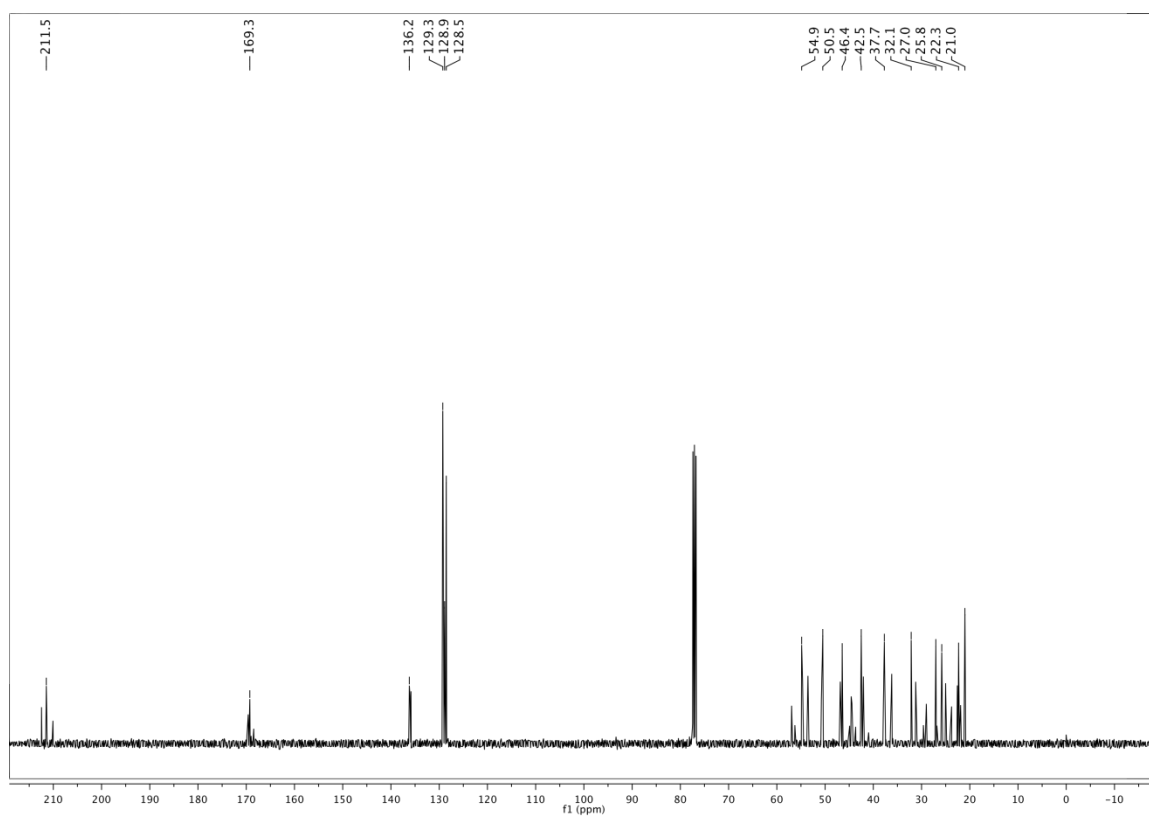

# Quinoline 45{2}

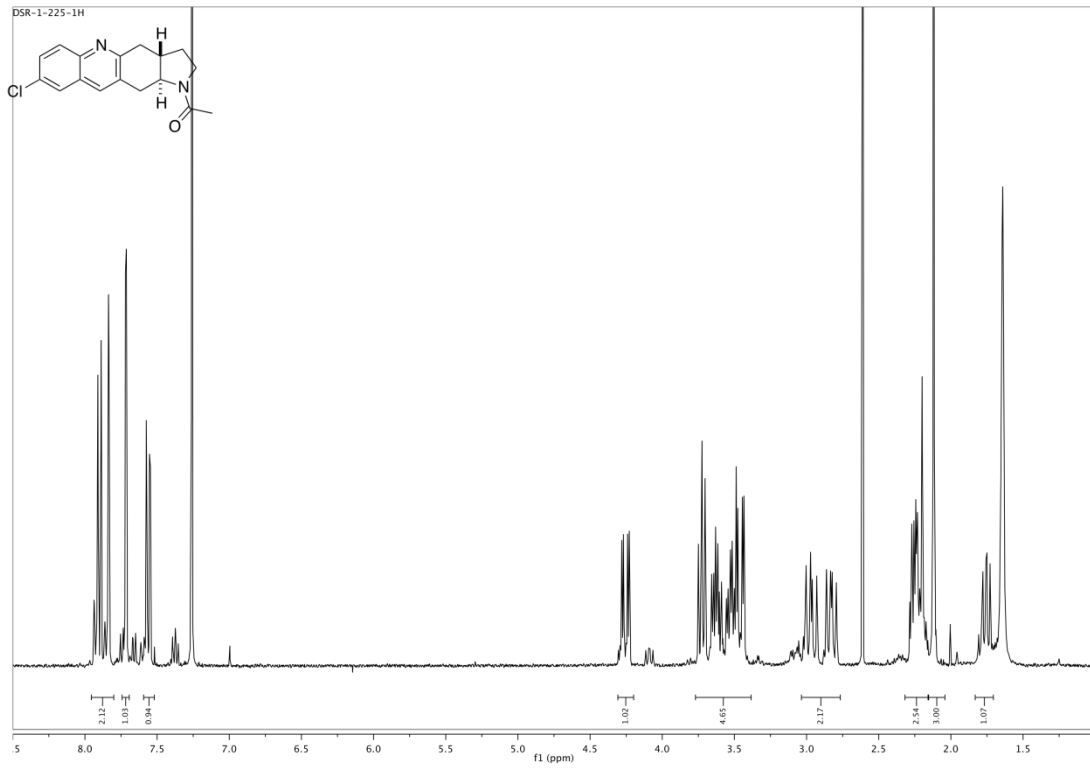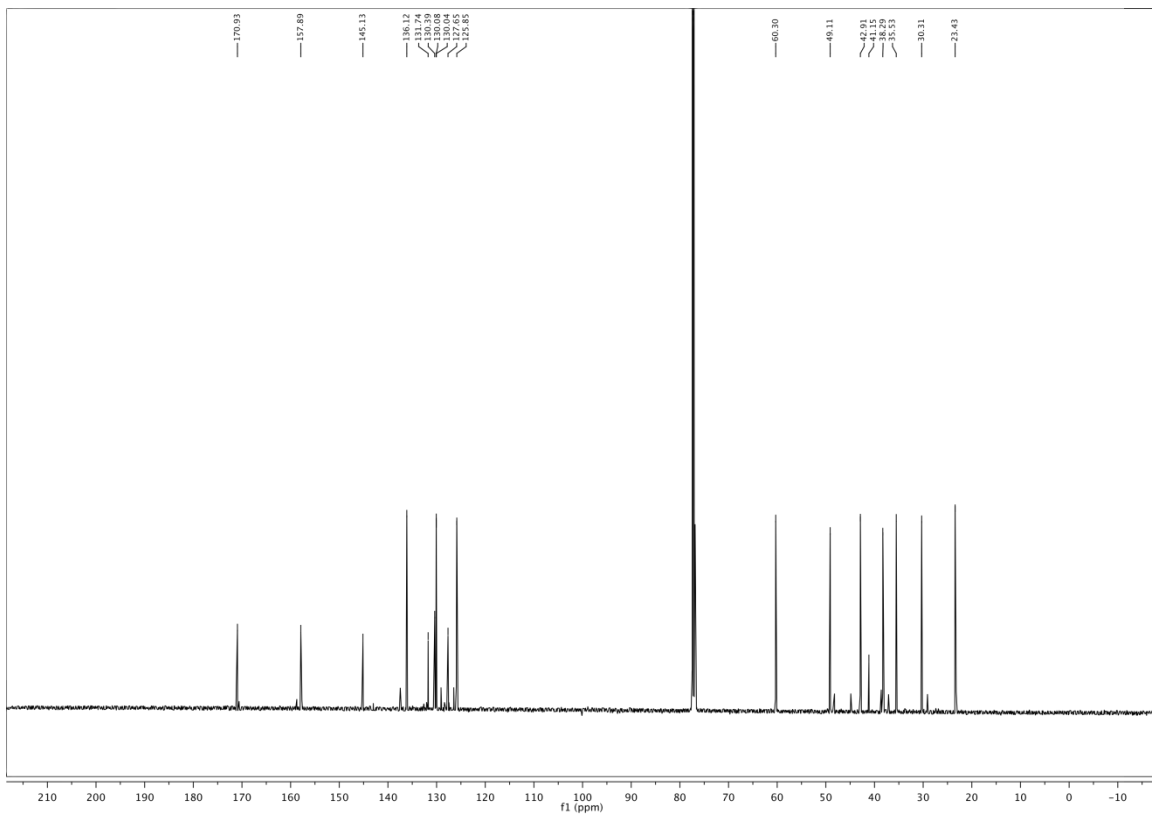

# Quinoline 45{8}

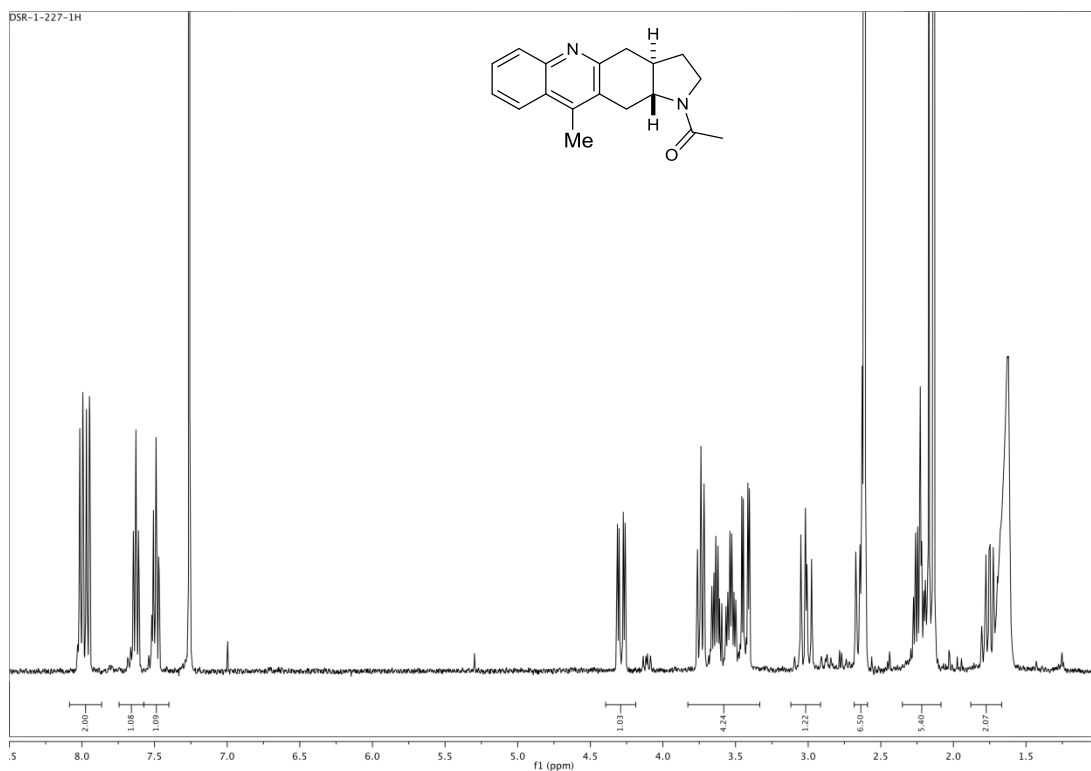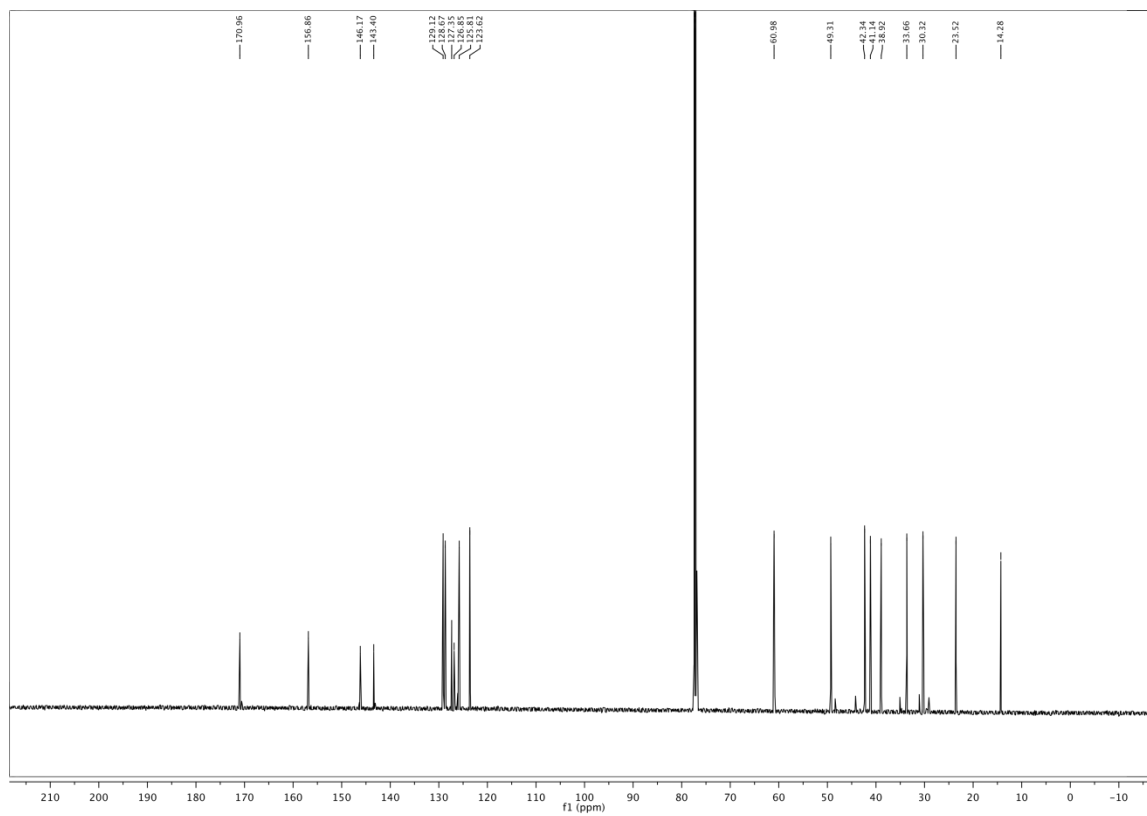



# Quinoline 45{11}

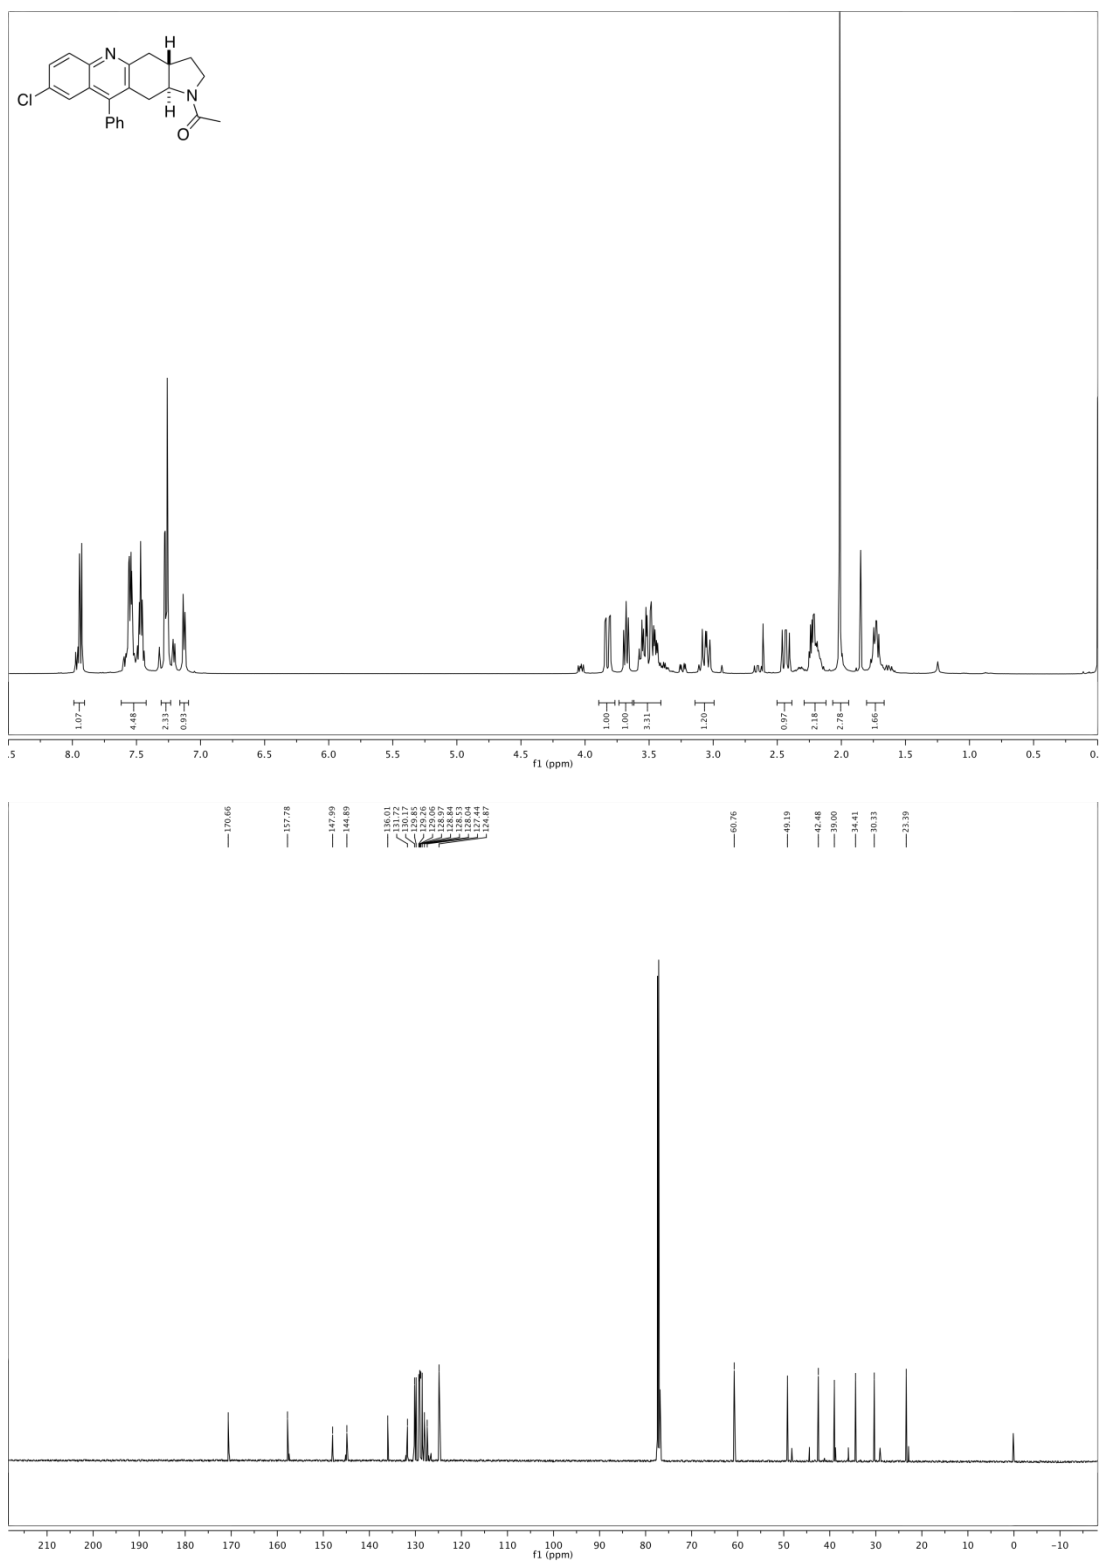

Quinoline 45{12}

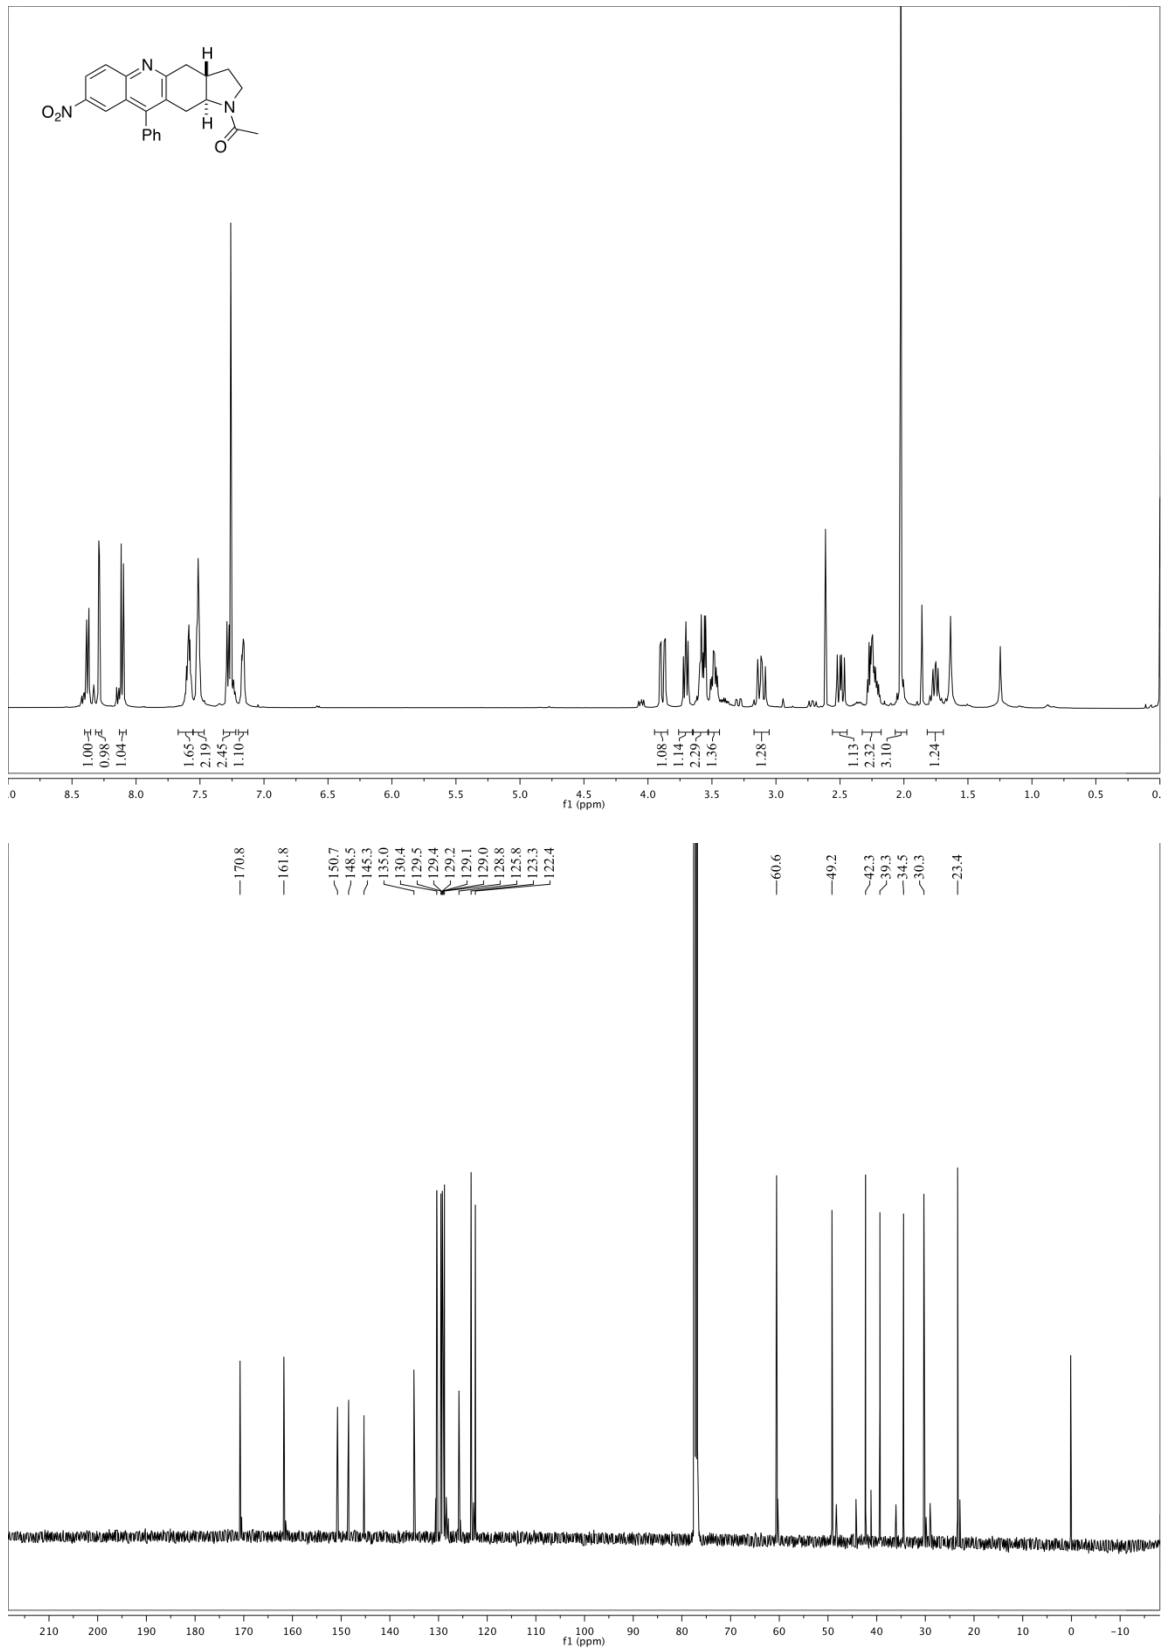

Quinoline **45**{10}

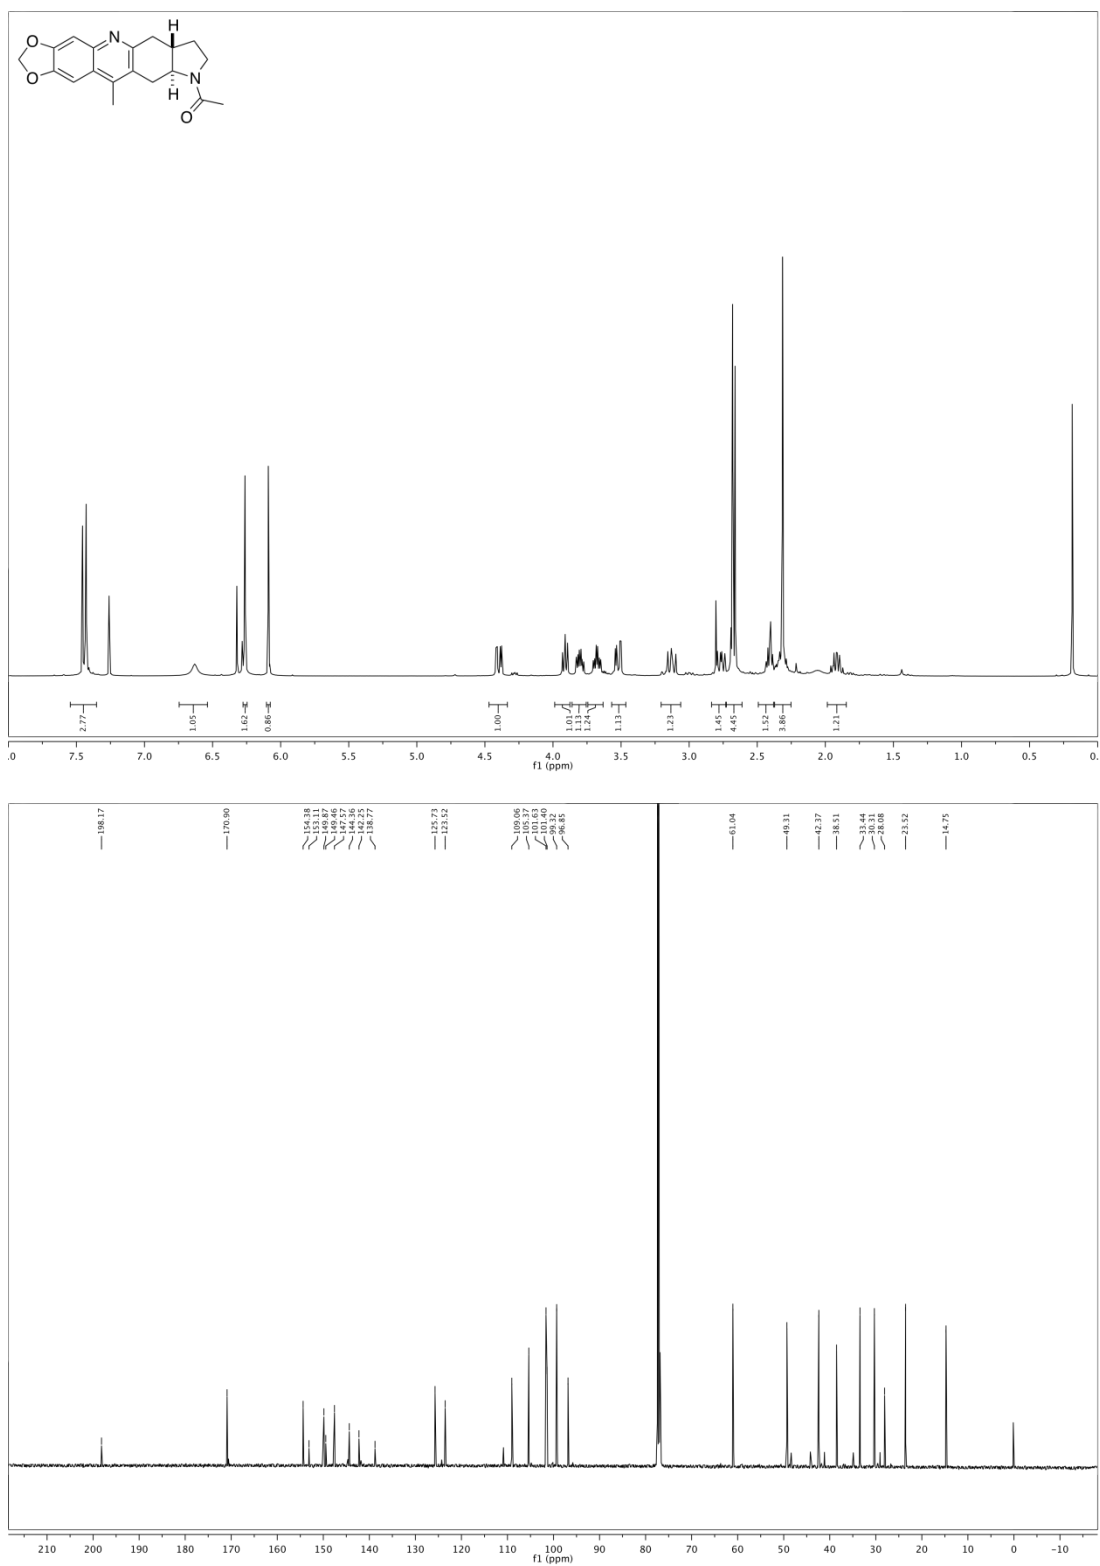

# Amine 44a{3}

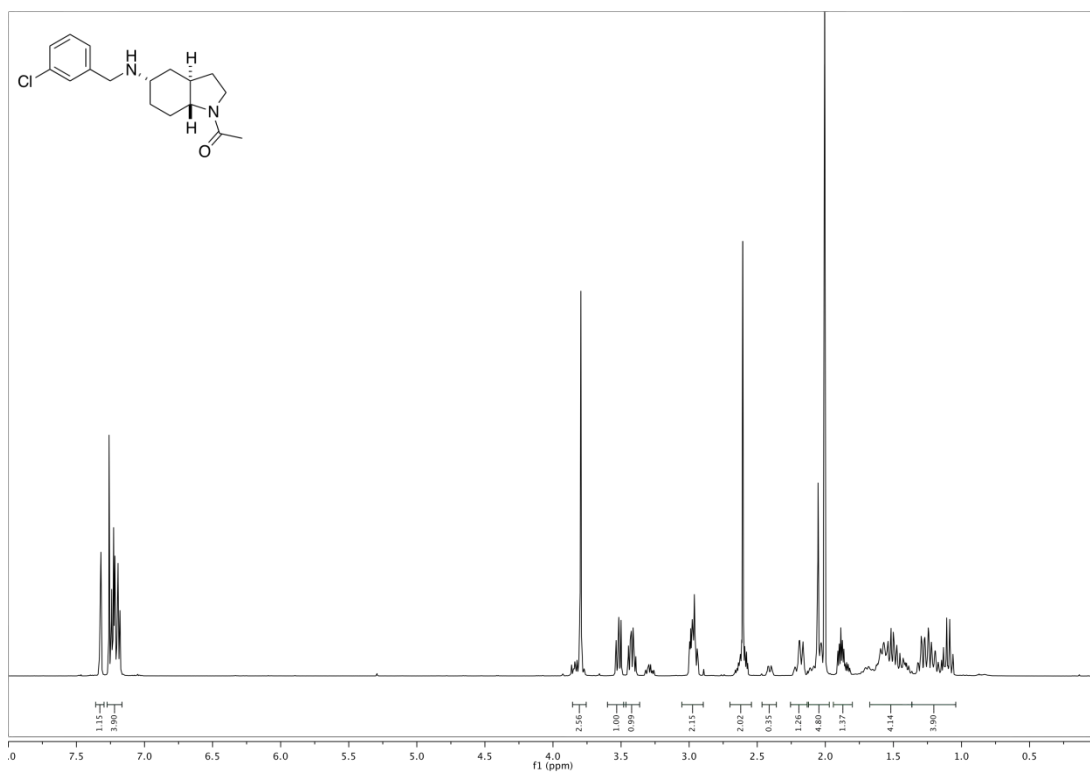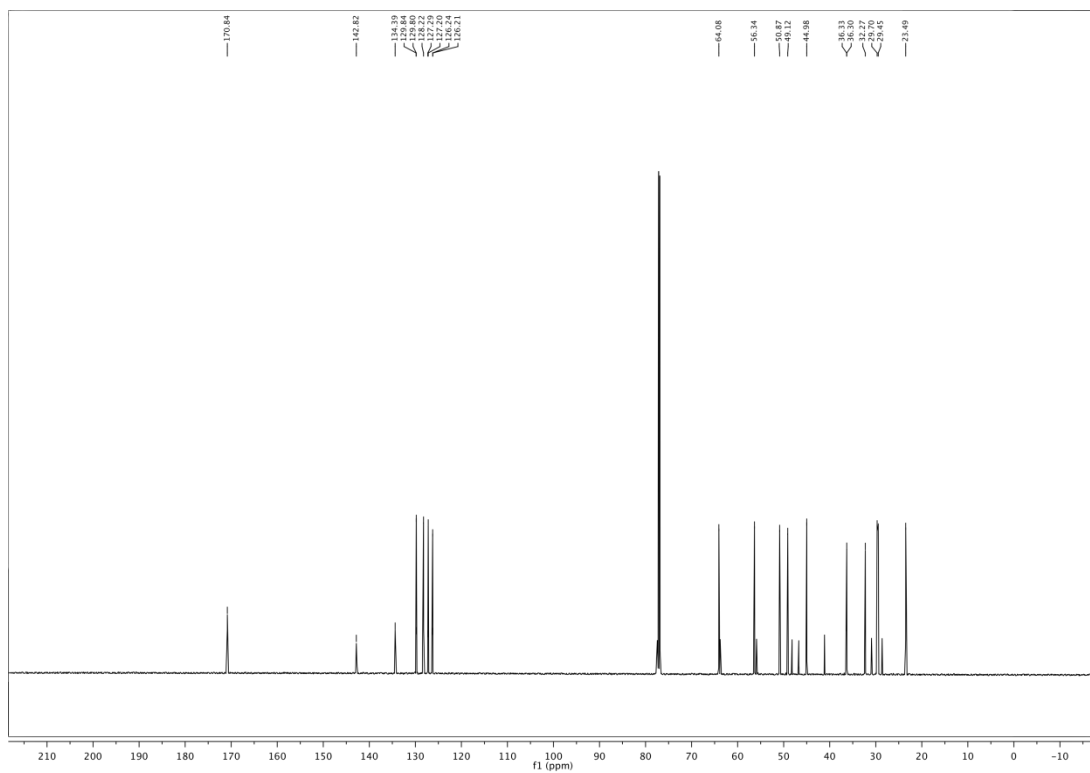

Amine **44b**{3}

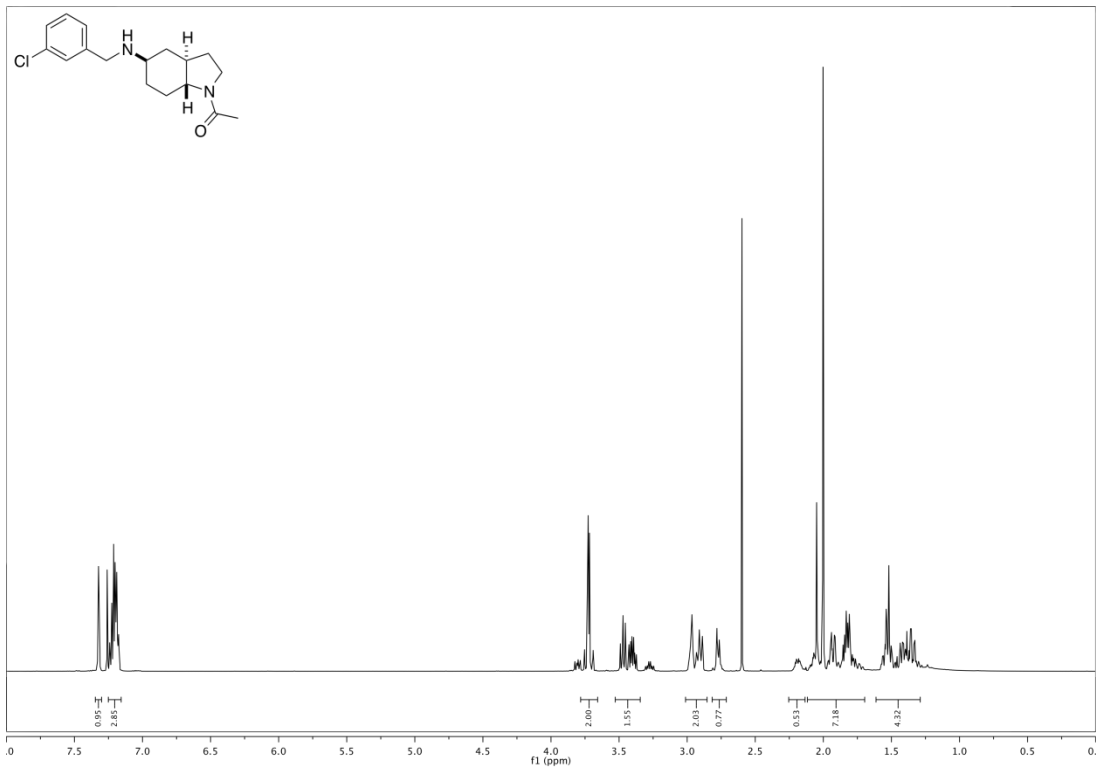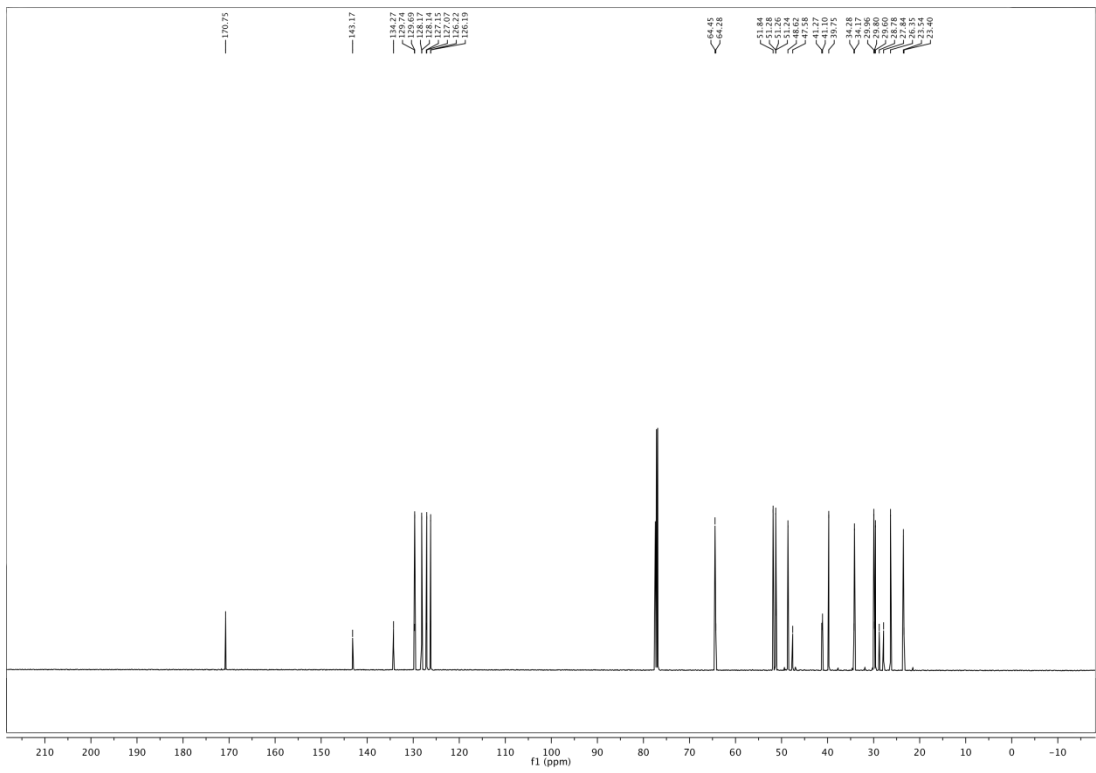

# Amine 44b{11}

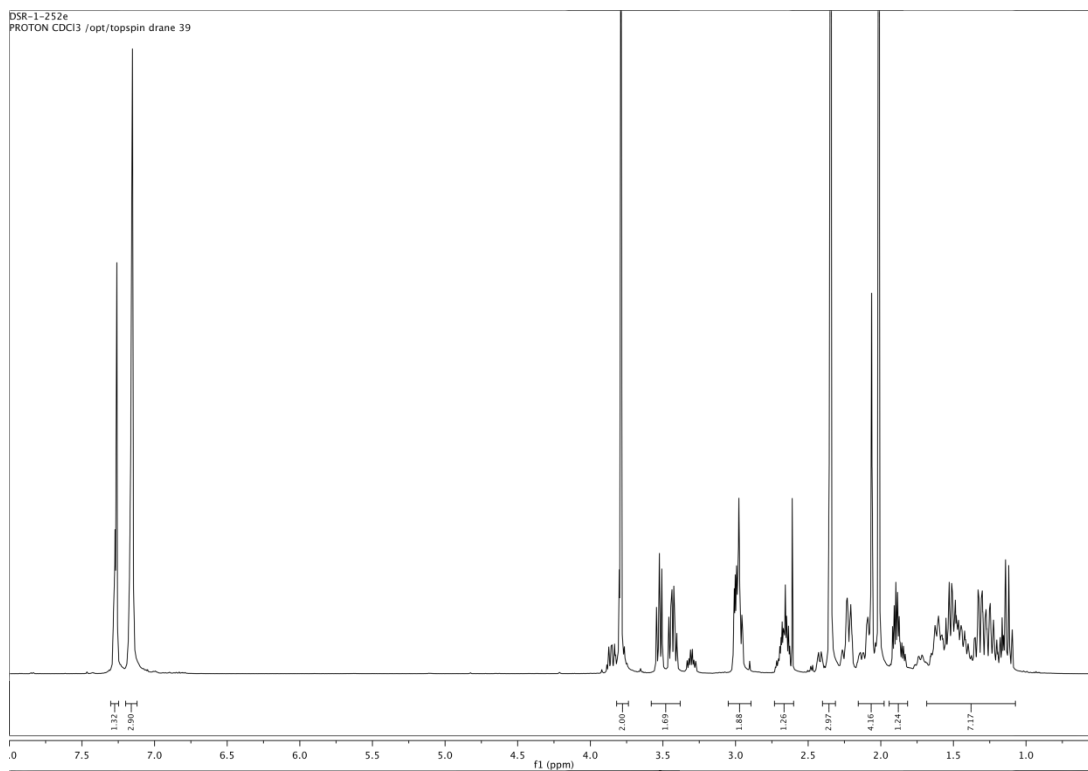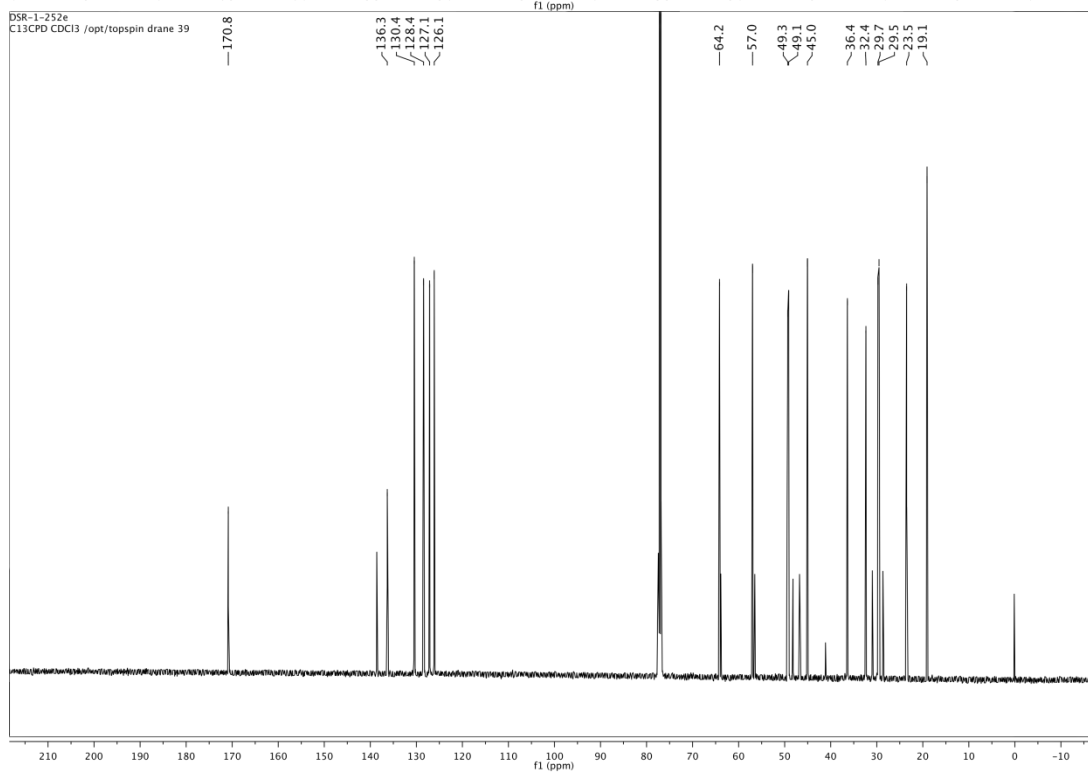

Amine **44b**{9}

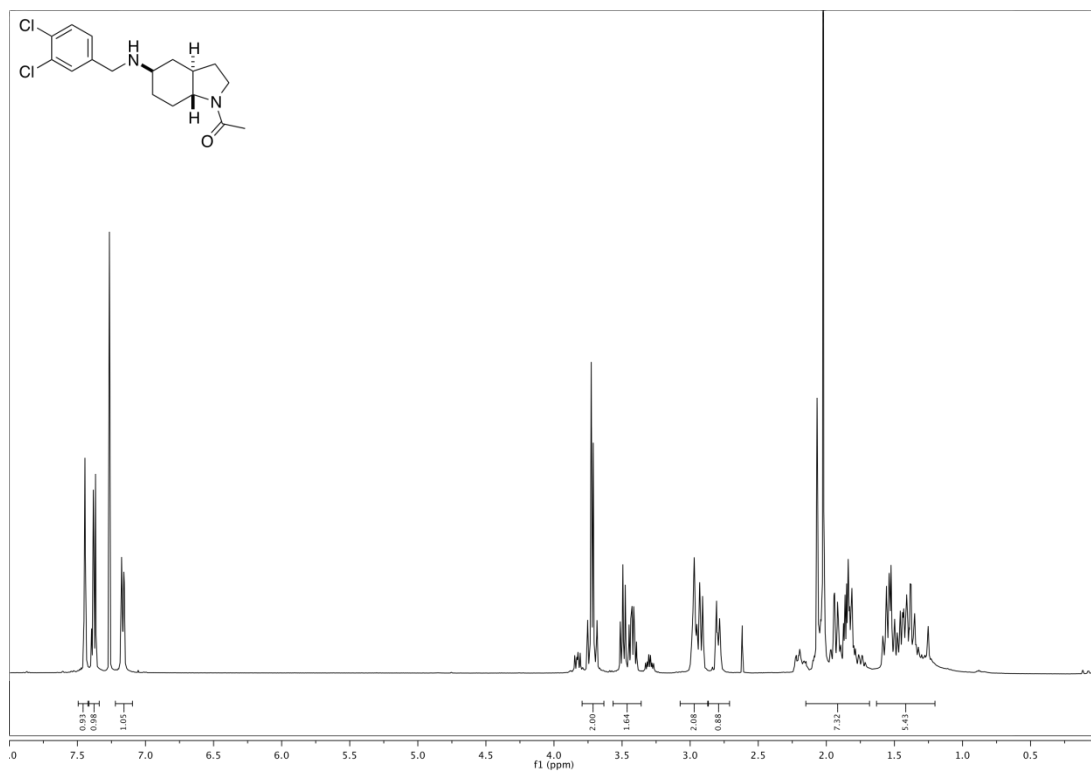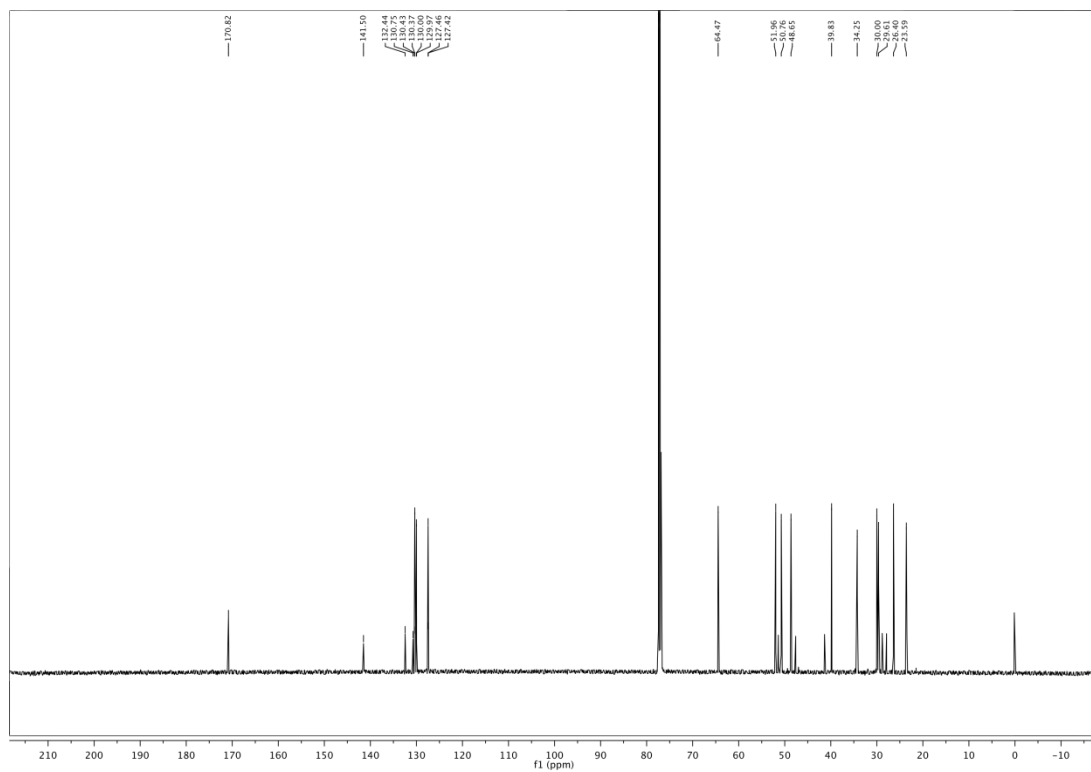

Amine 44a{6}

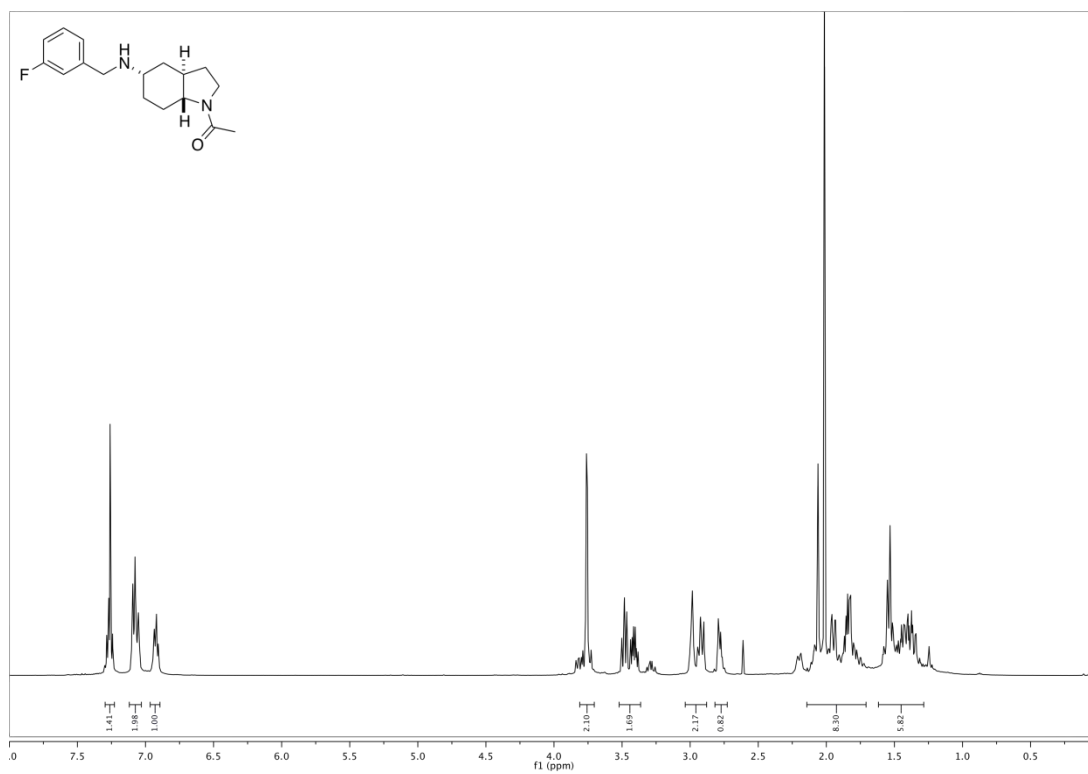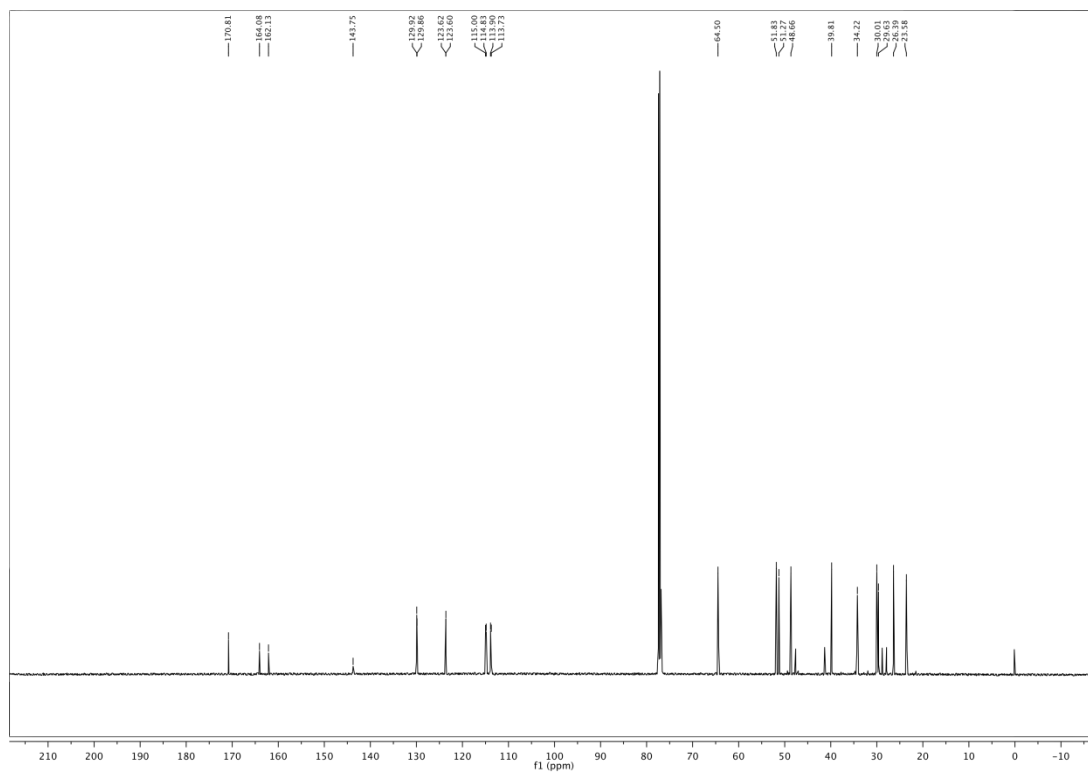



**Amine 44b{8}**

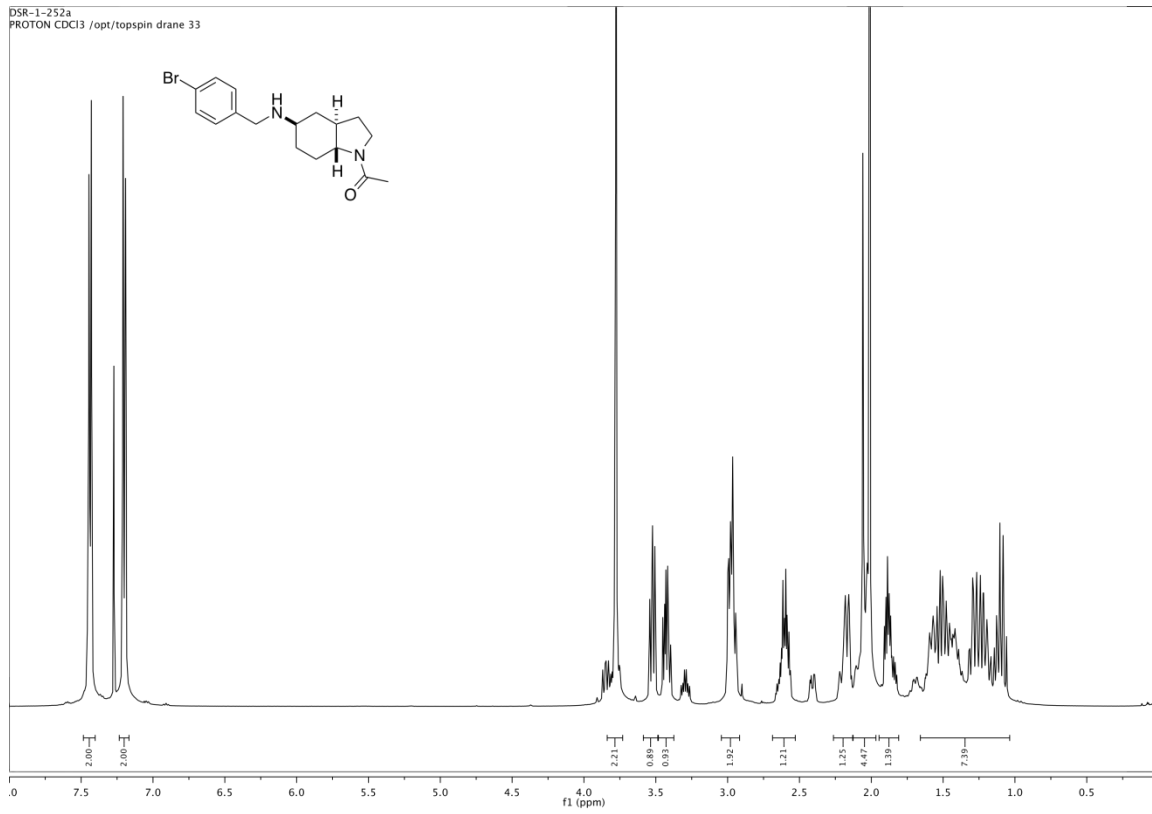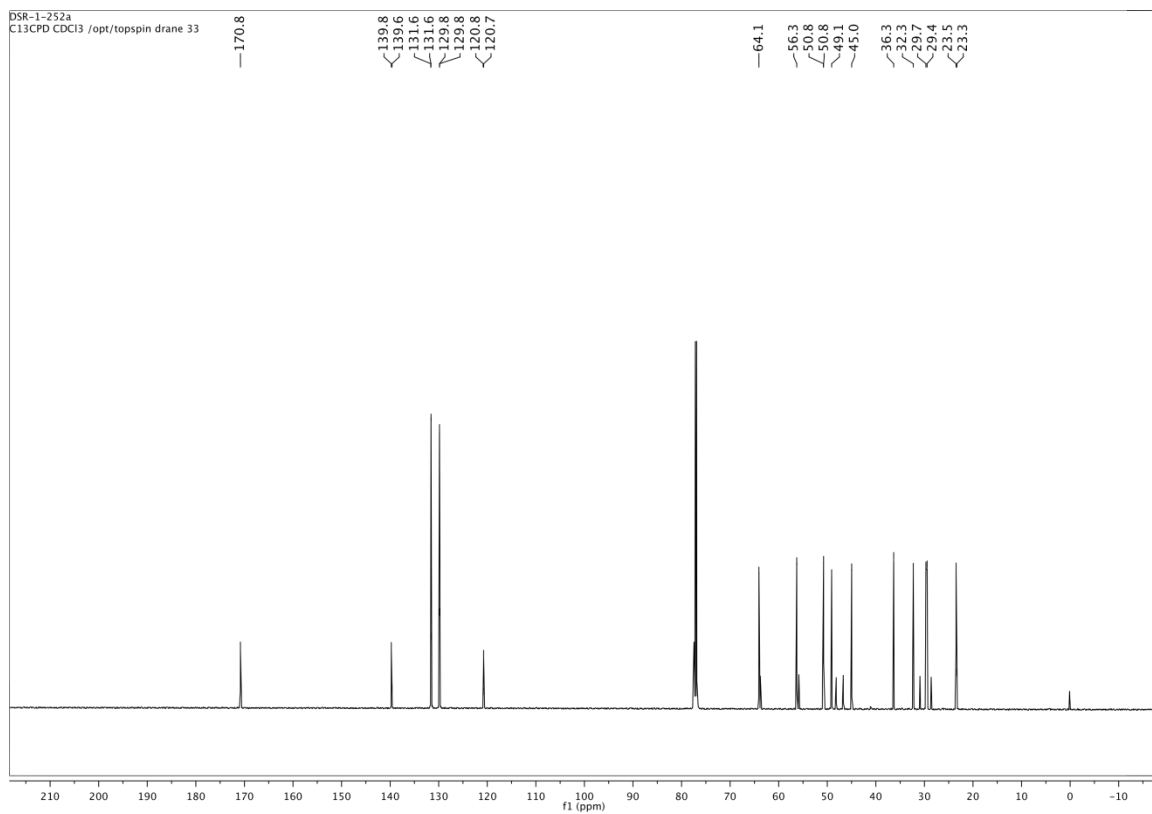

# Amine 44a{8}

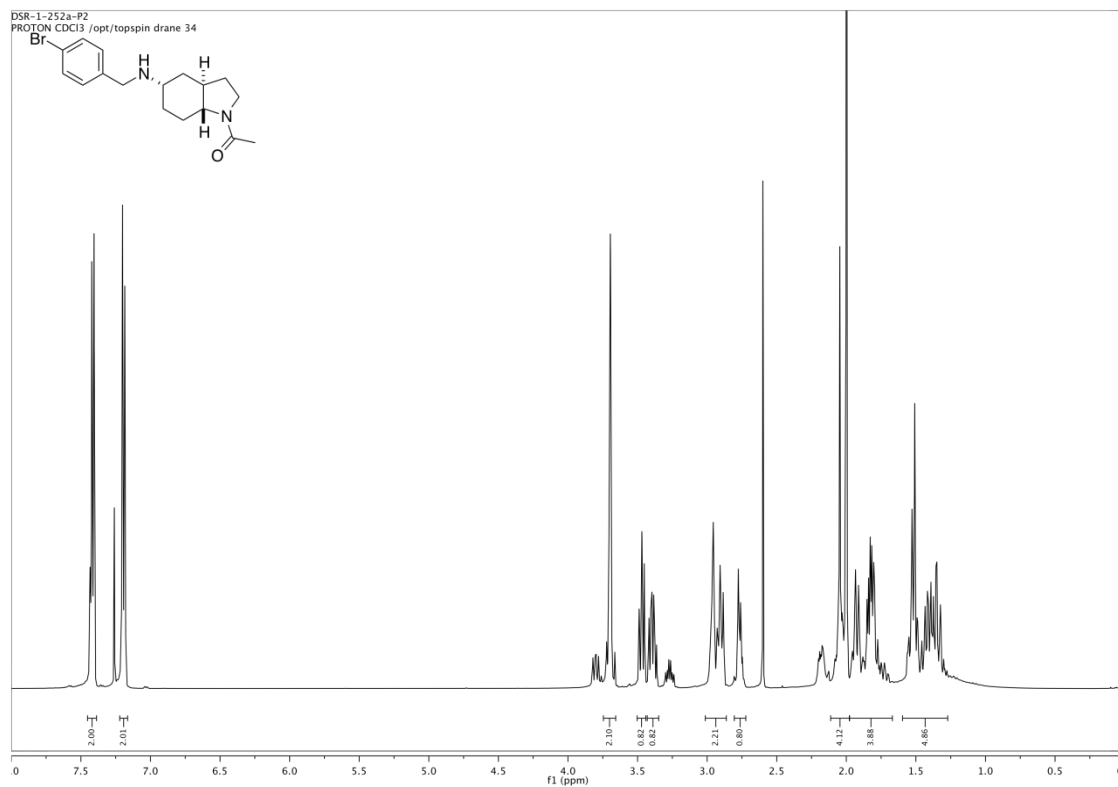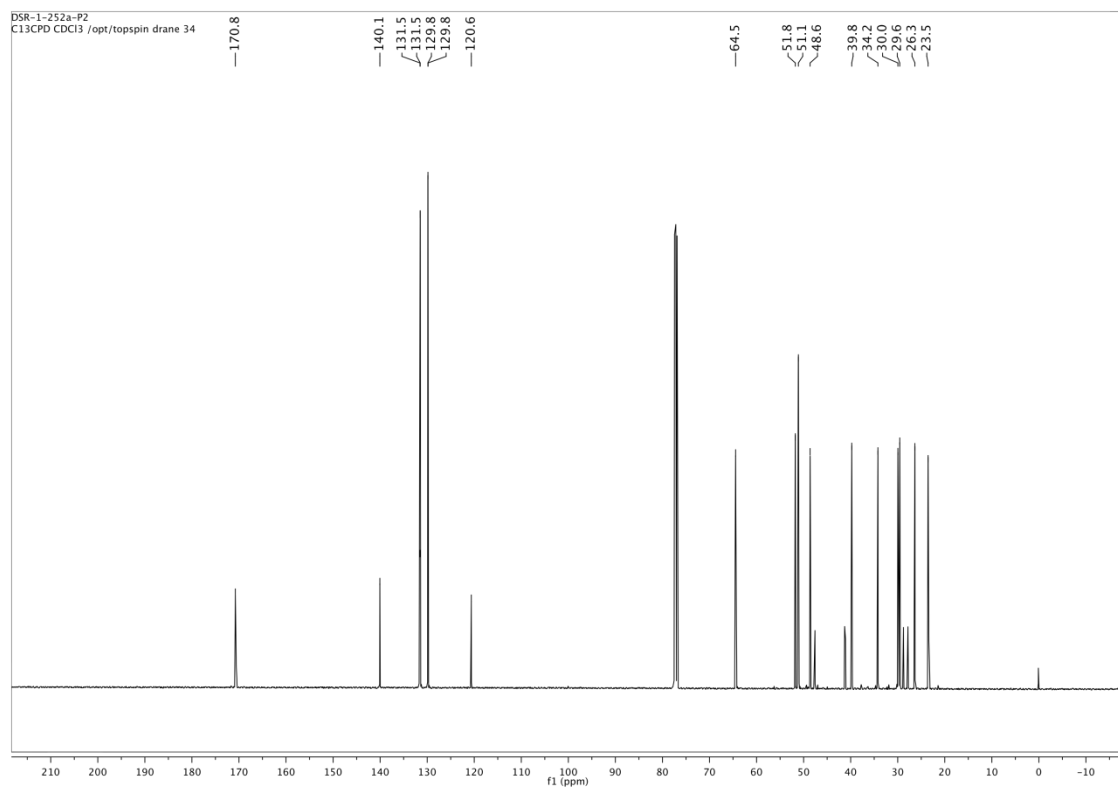

# Amine 44b{15}

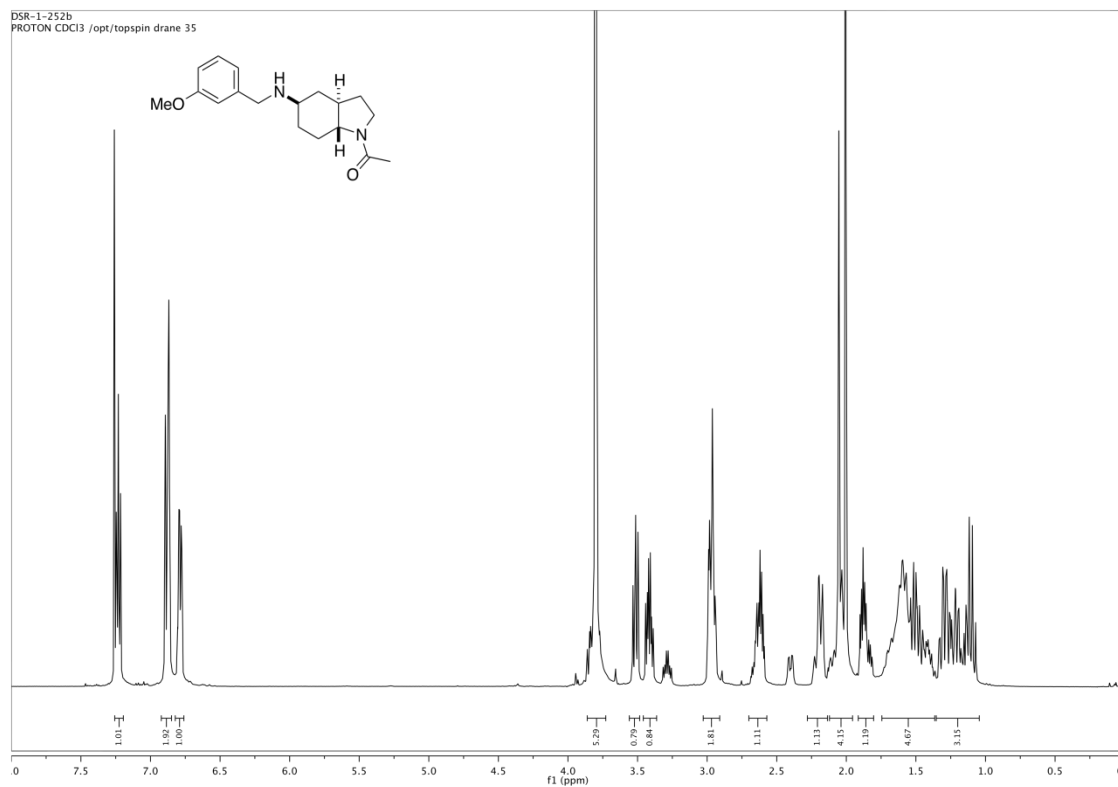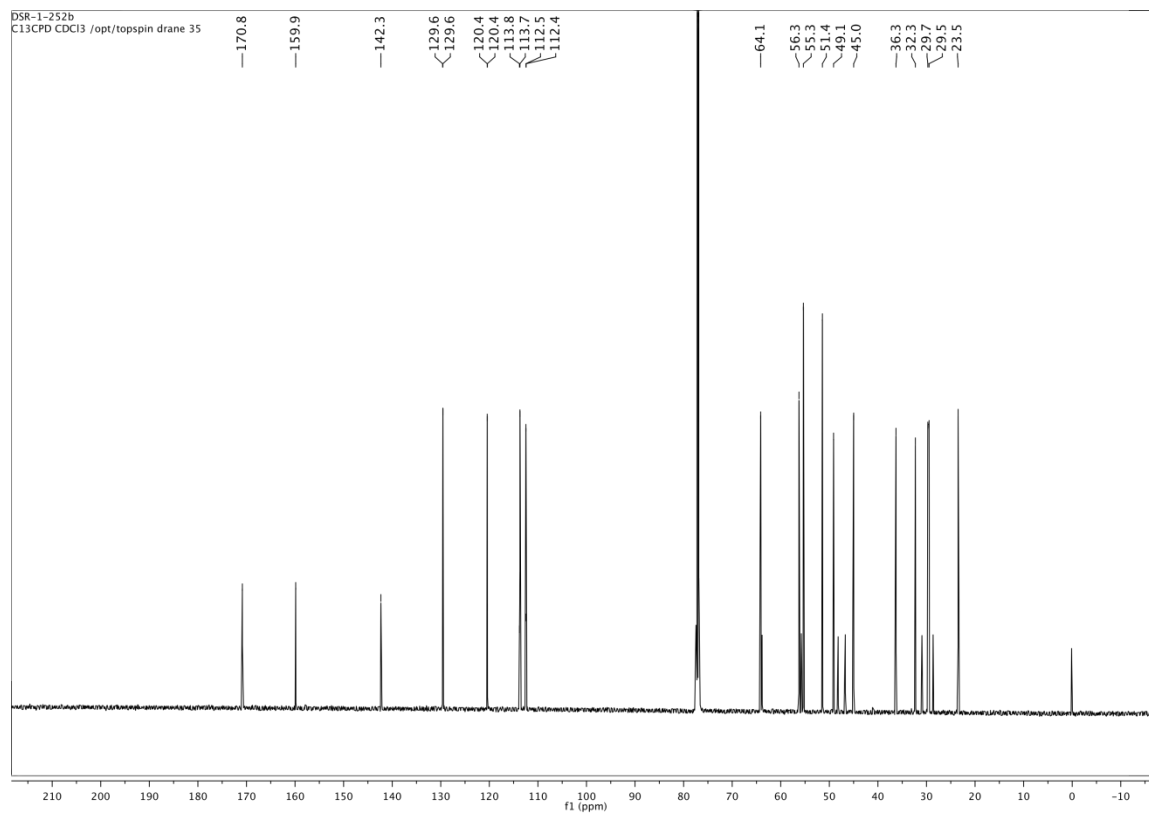

Amine **44a**{15}

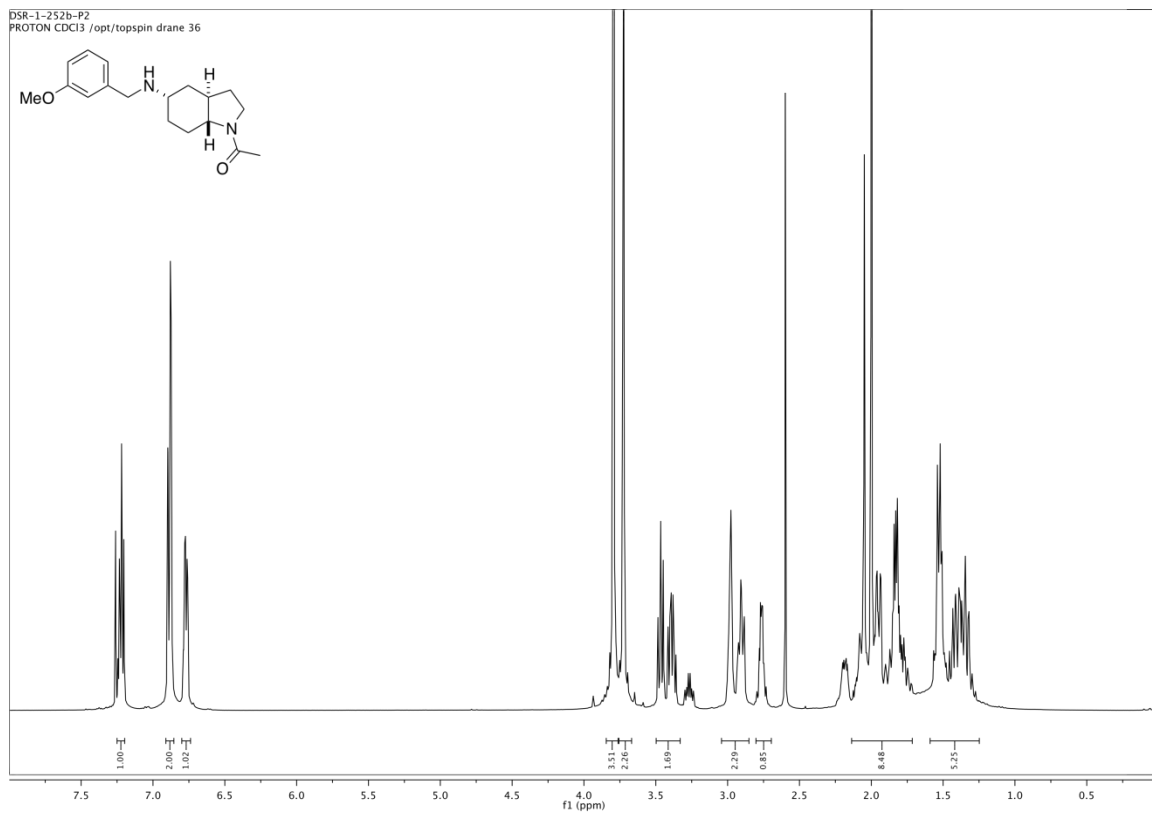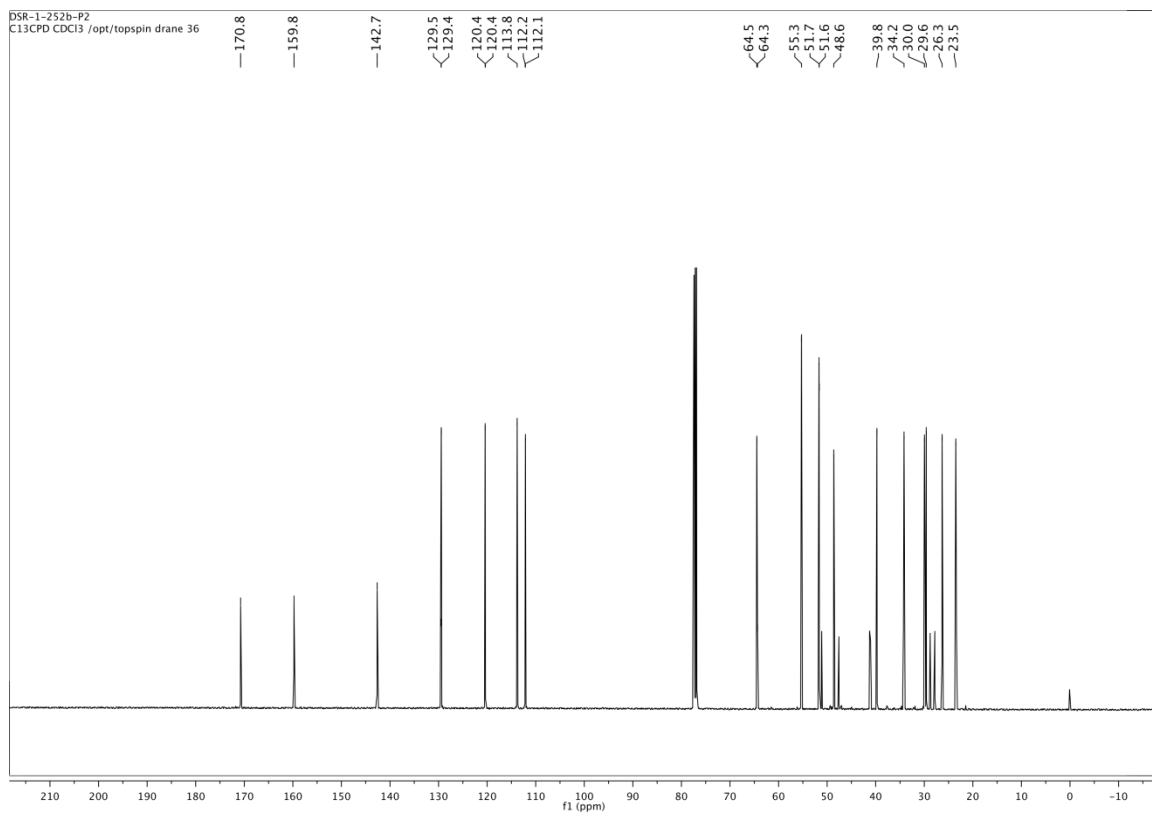

**Amine 44a{14}**

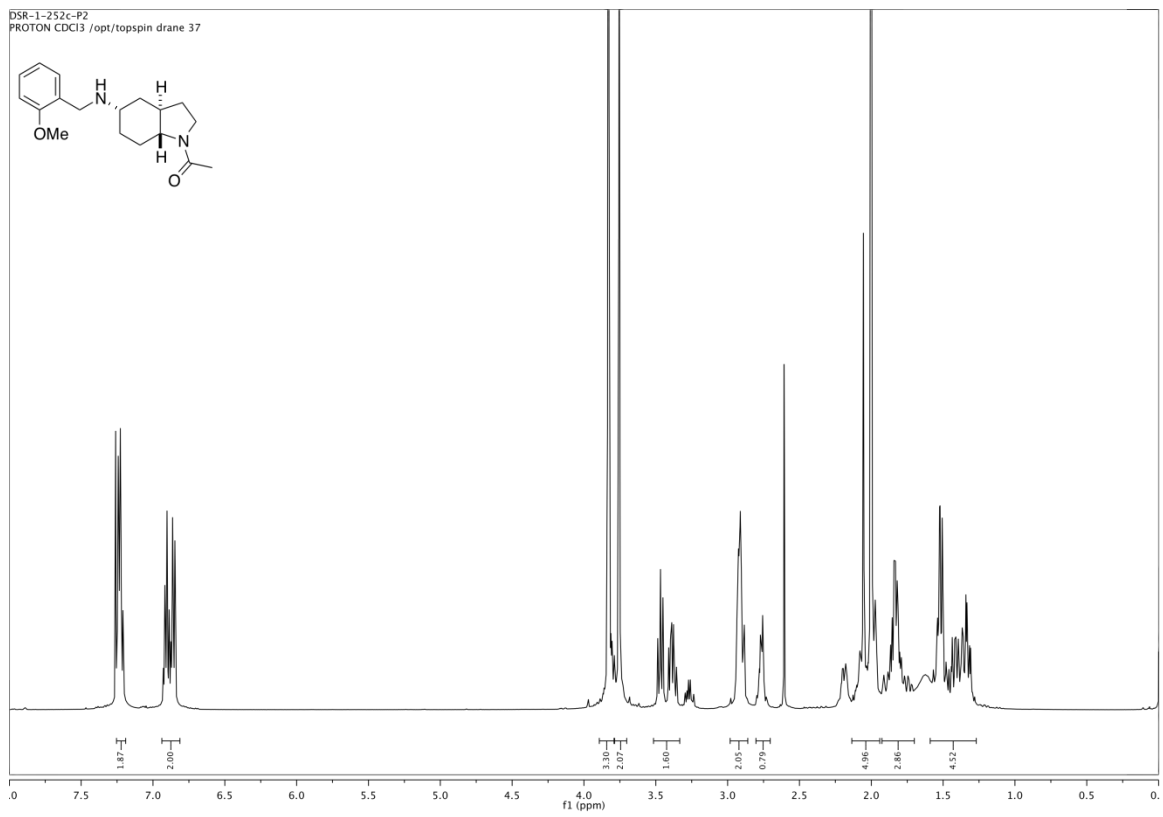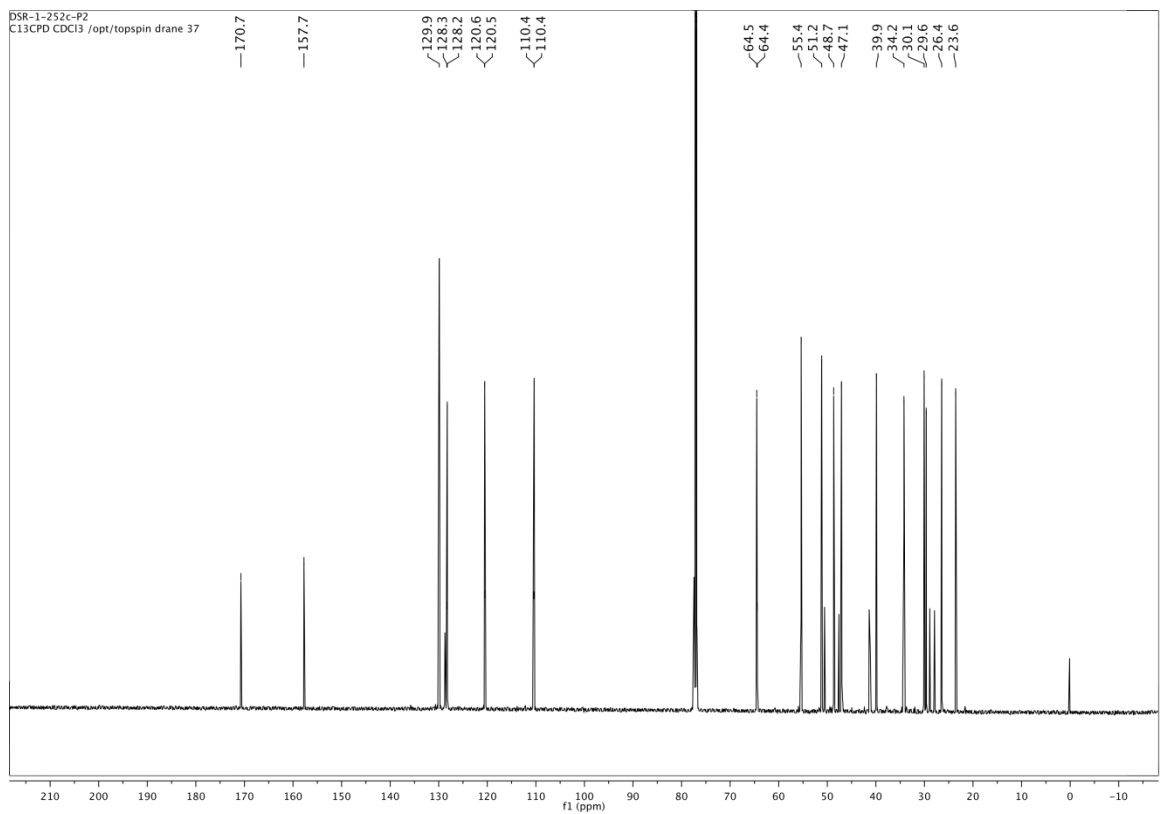

**Amine 44a{16}**

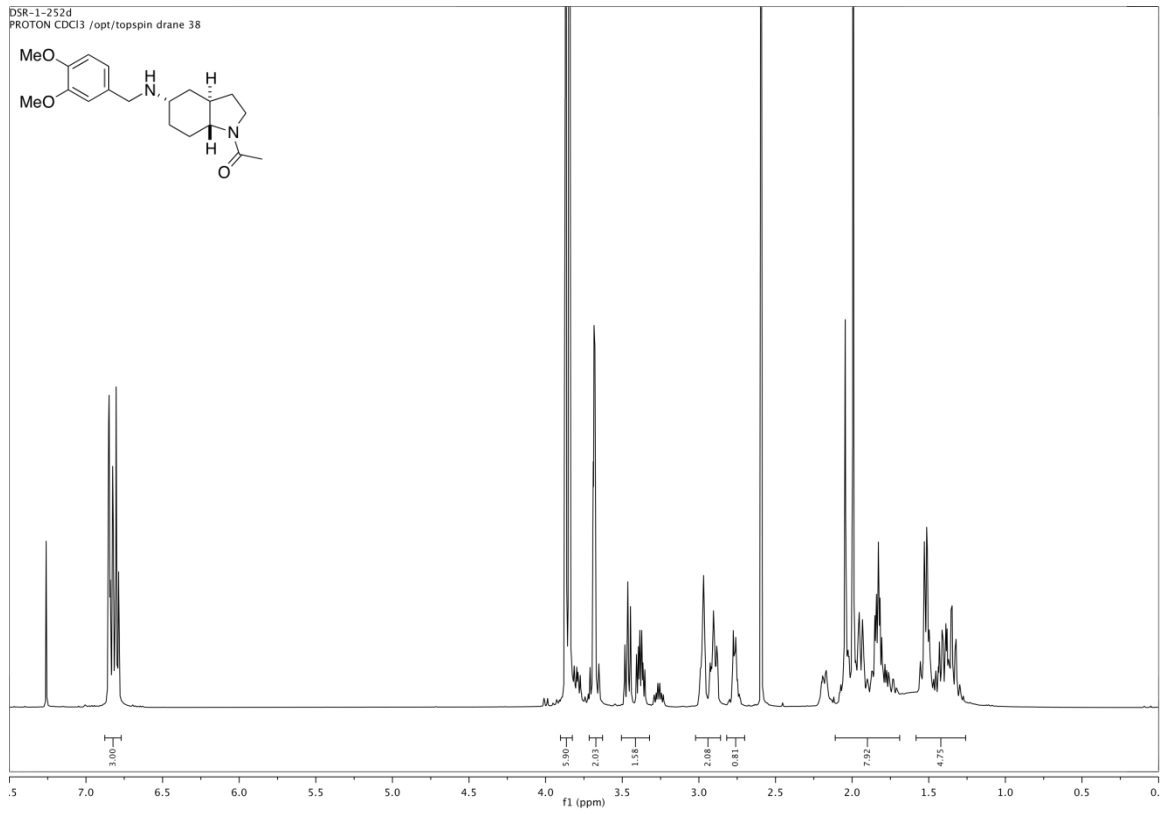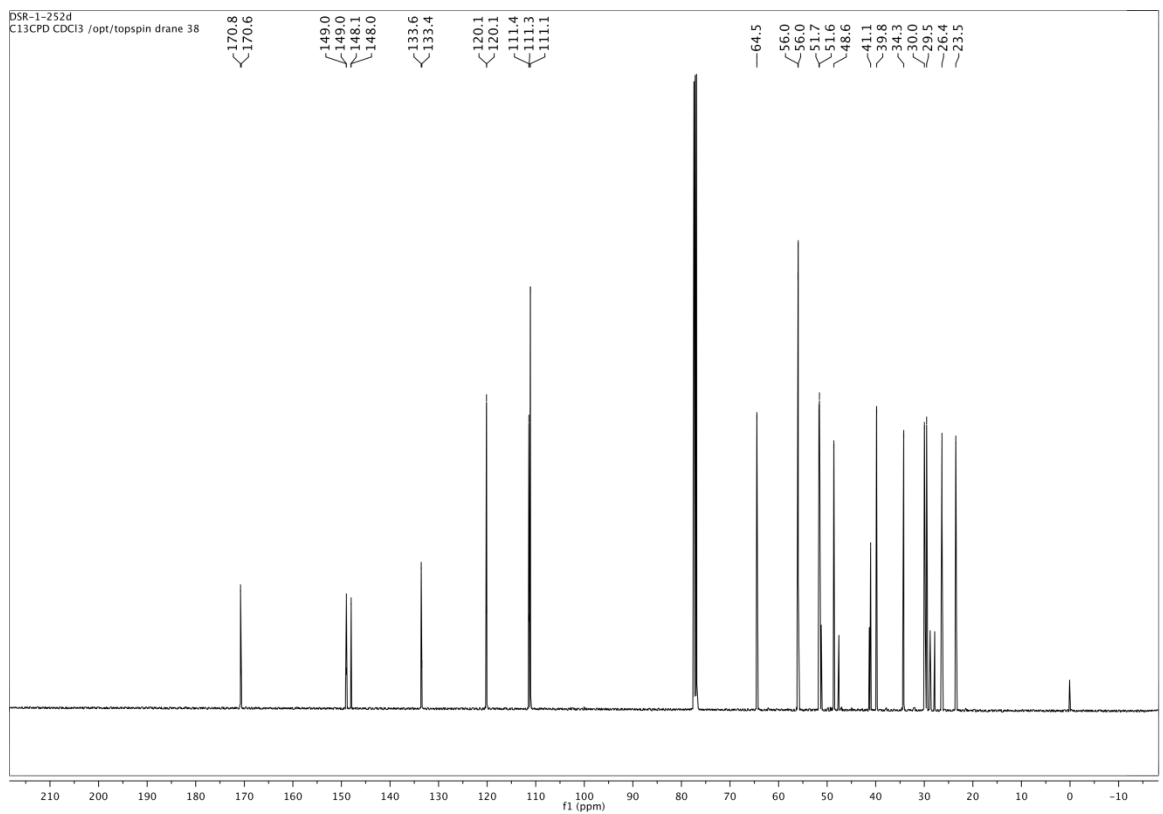

# Amine 44a{11}

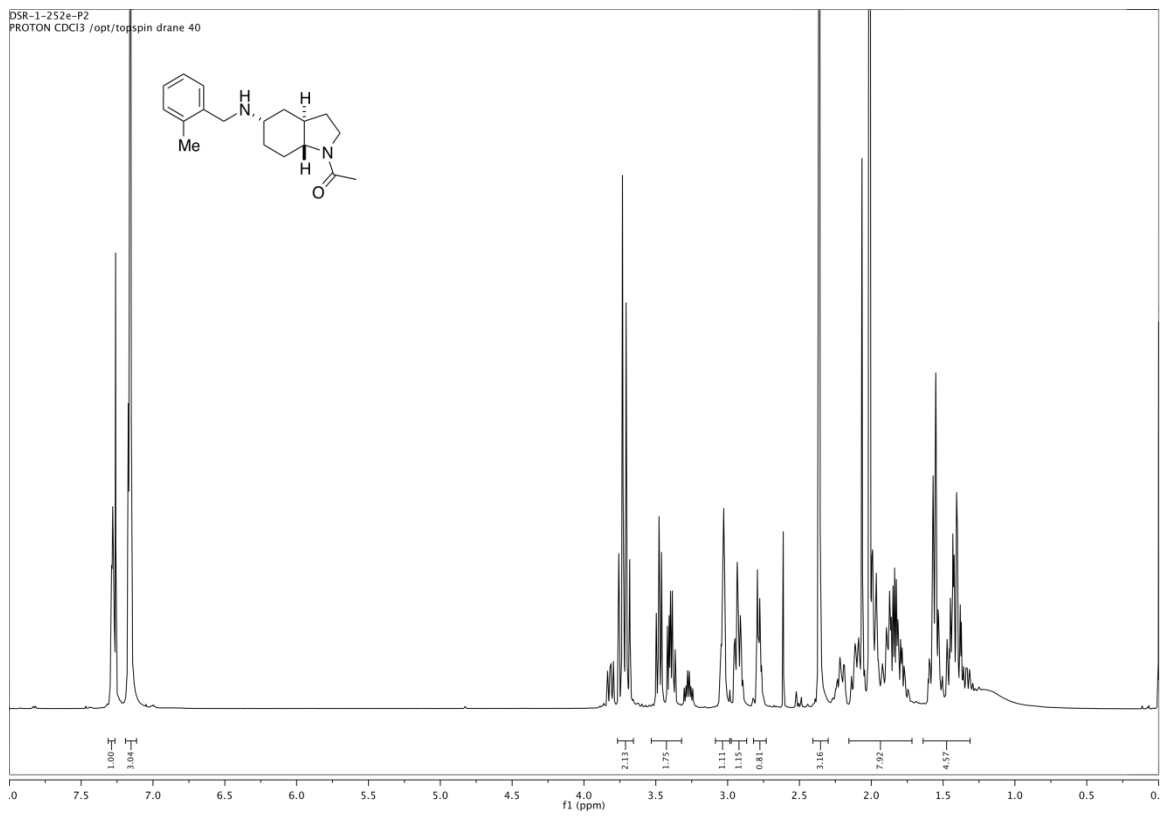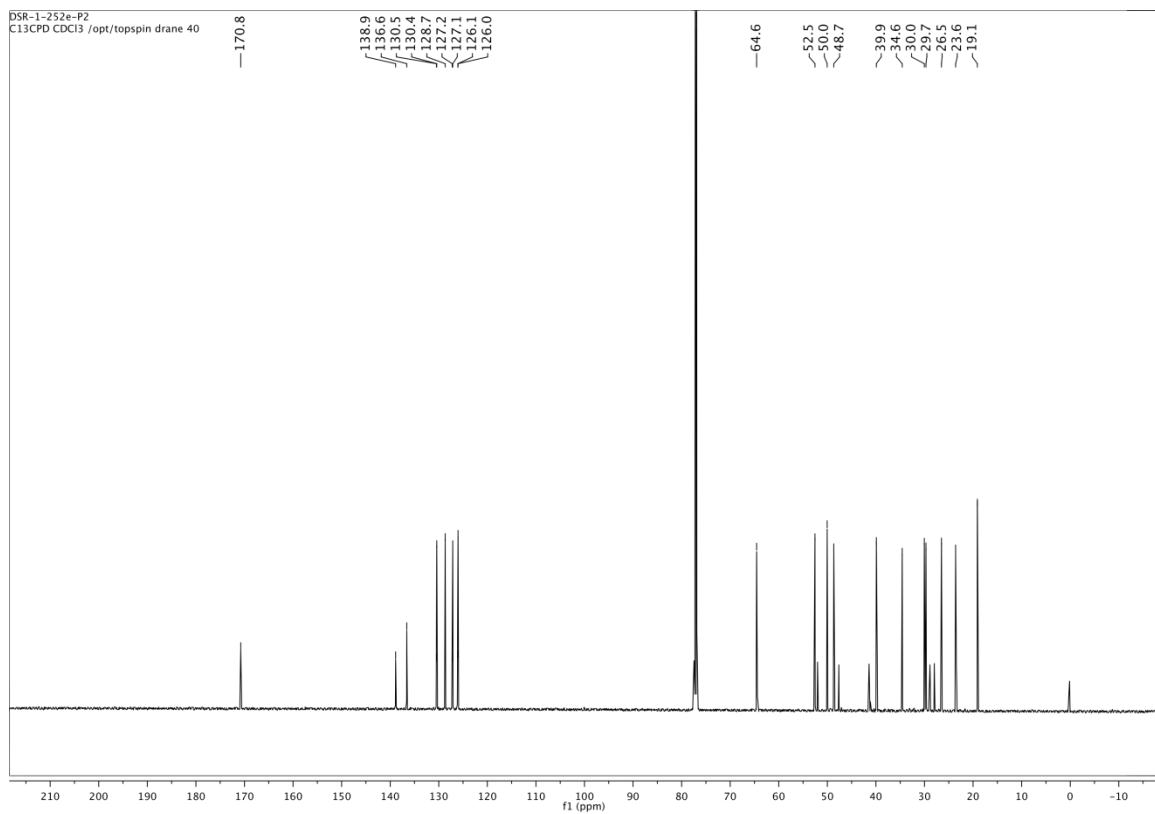

Amine **44b**{19}

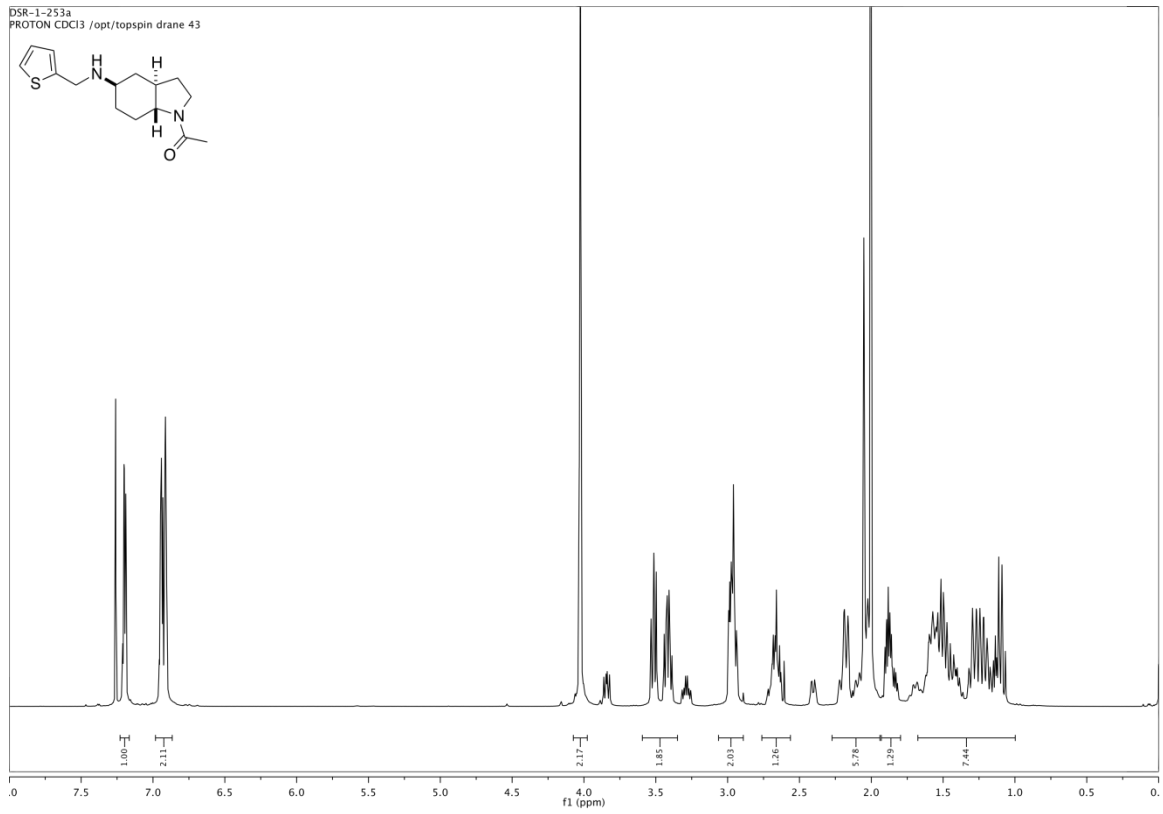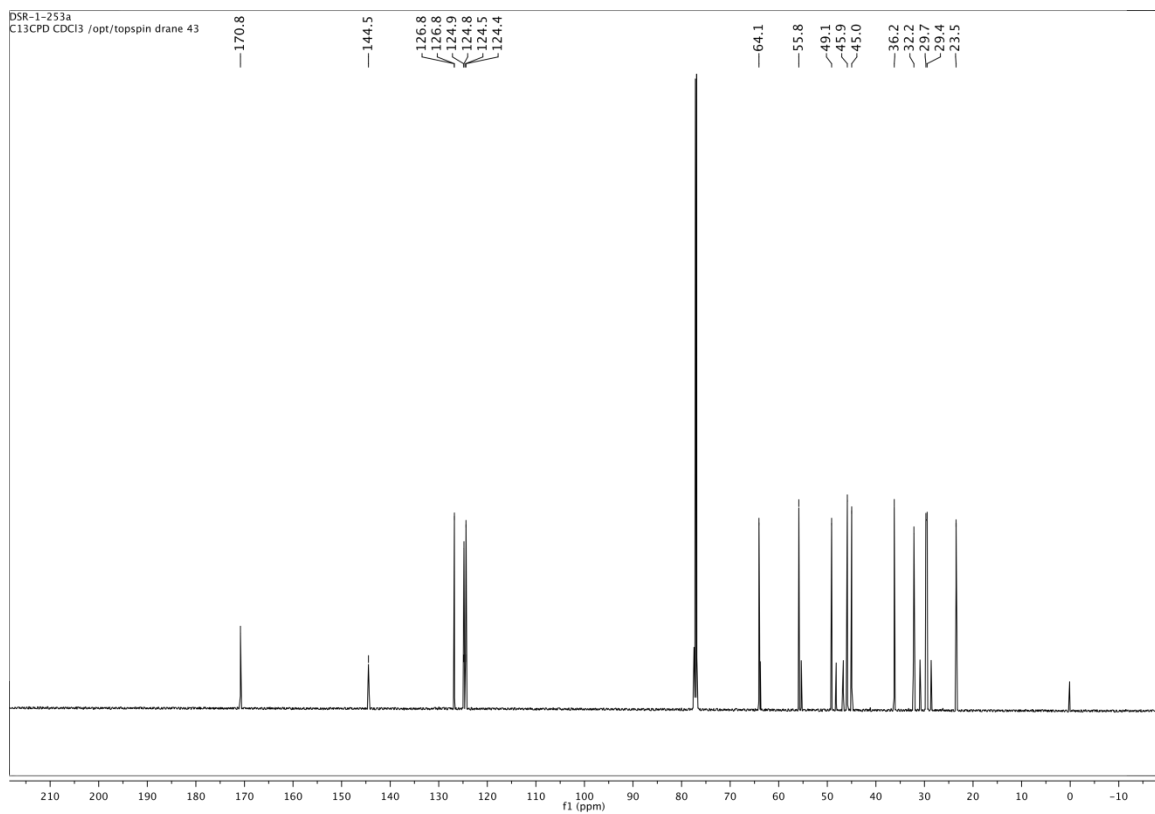



# Amine 44b{21}

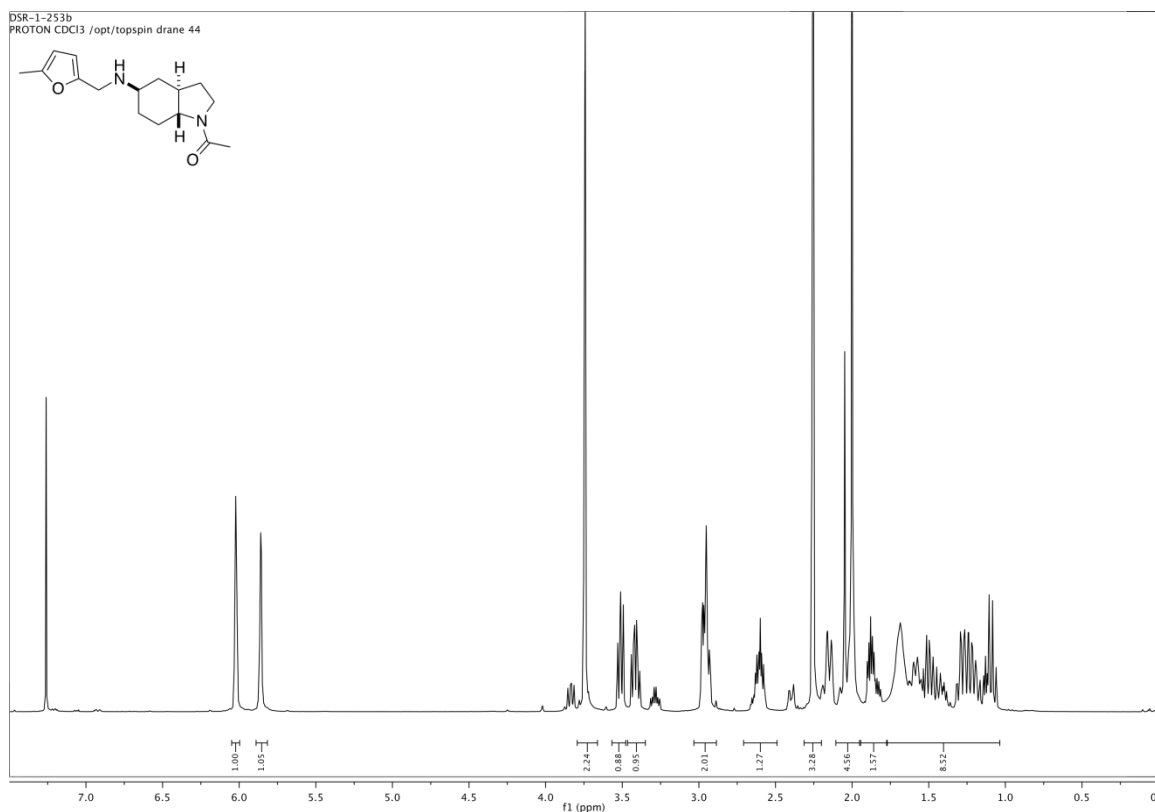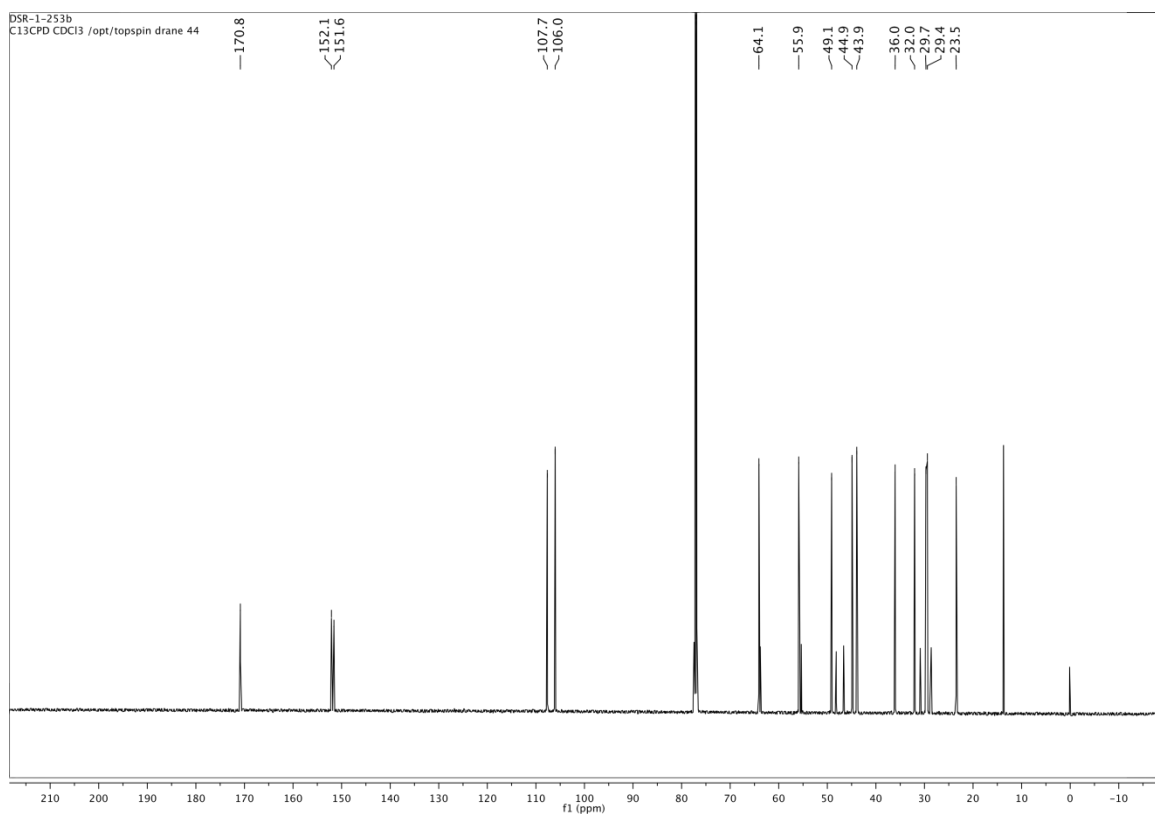



VI. Supplementary Note: X-ray crystallography data.

Structure of **3b** (Deposition number: CCDC 945414):

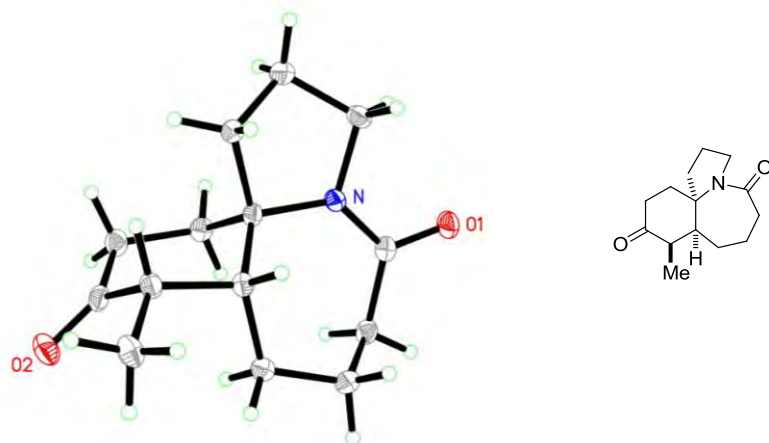

Structure of **3c** (Deposition number: CCDC 945415):

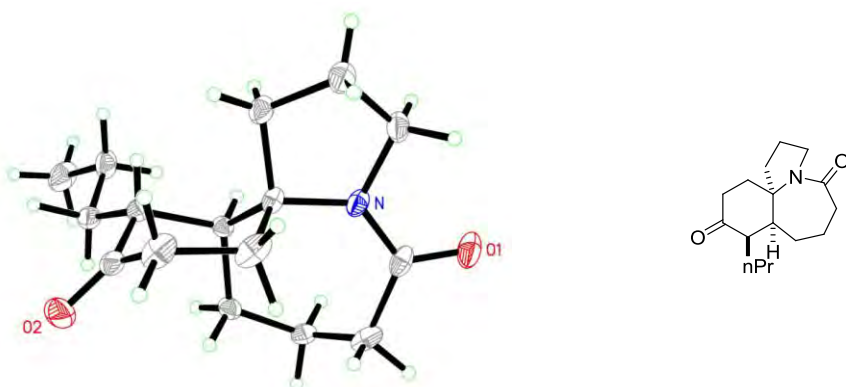

Structure of **3d** (Deposition number: CCDC 945419):

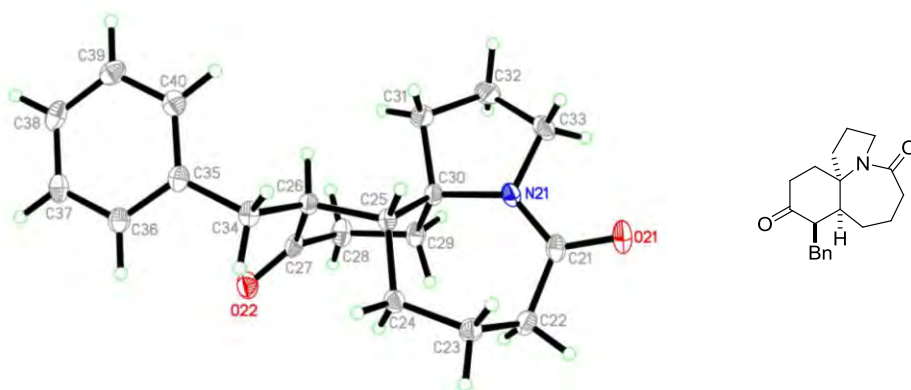

Structure of **S3b** (Deposition number: CCDC 945416):

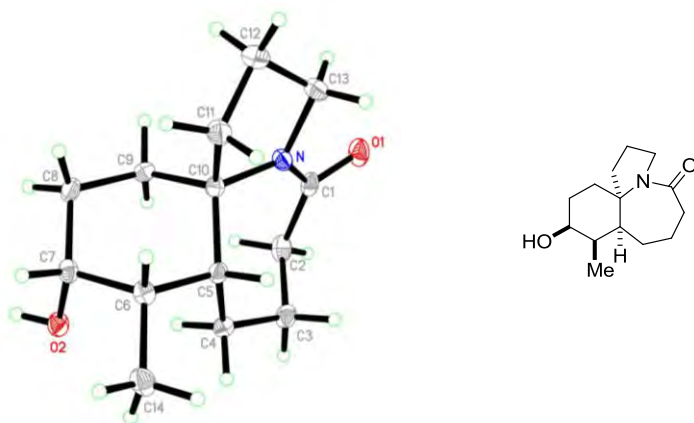

Structure of **S3c** (Deposition number: CCDC 945417):

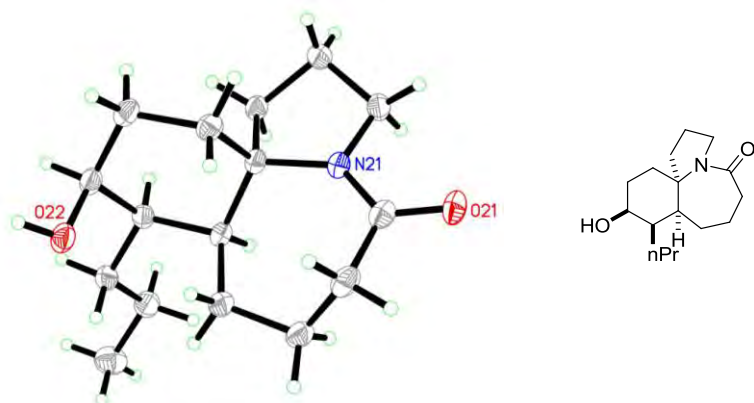

Structure of **S3d** (Deposition number: CCDC 945421):

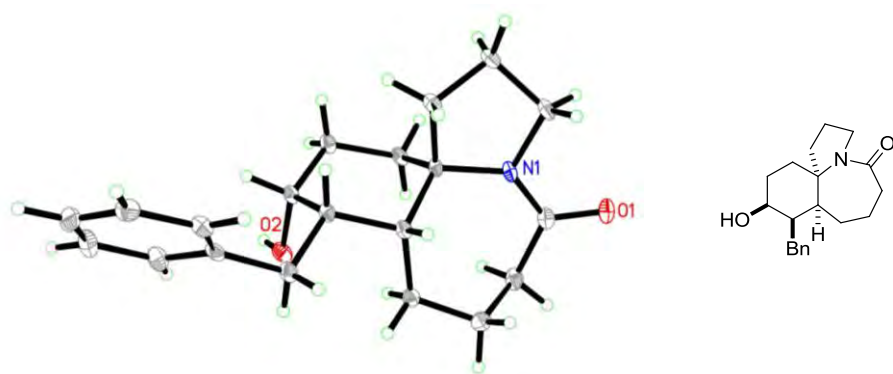

Structure of **29d**{2} (Deposition number: CCDC 945418):

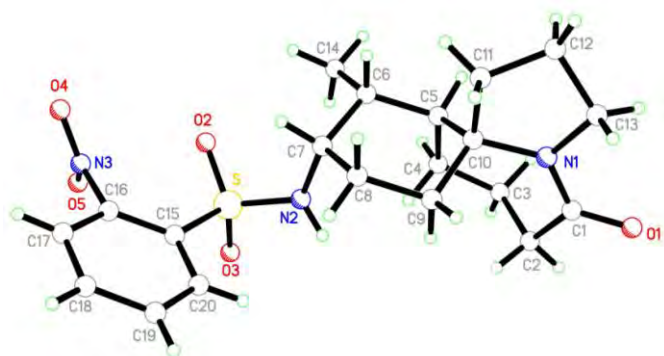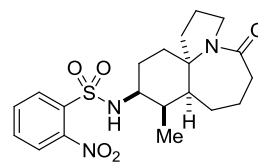

Structure of **29c**{8} (Deposition number: CCDC 945420):

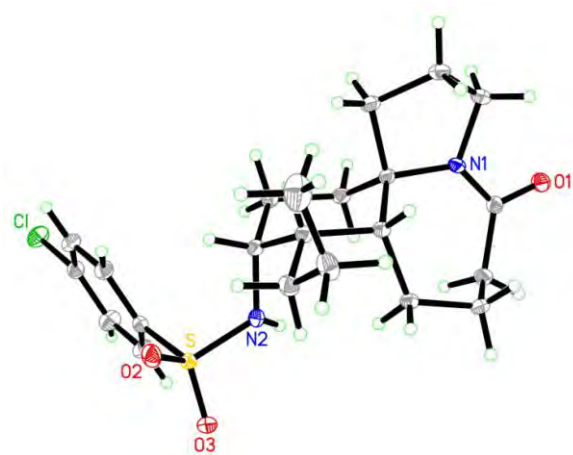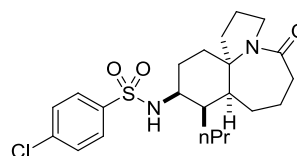

Structure of **S6** (Deposition number: CCDC 945413):

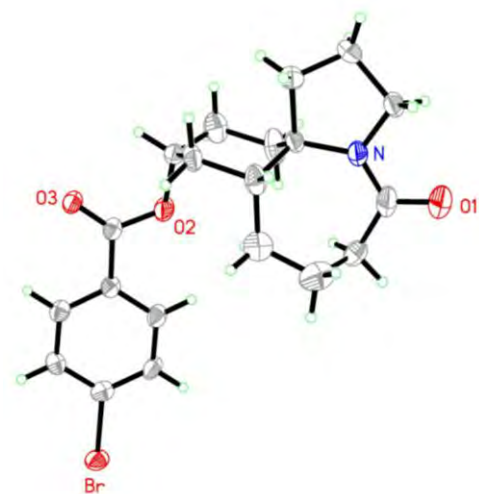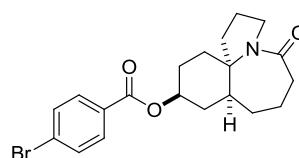

Structure of **S14** (Deposition number: CCDC 946099):

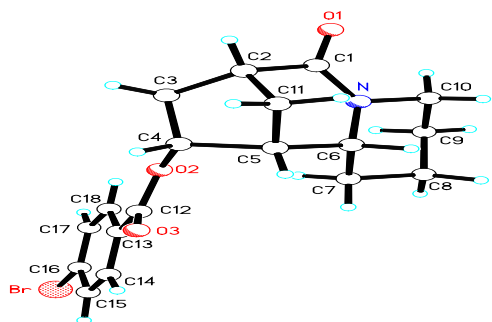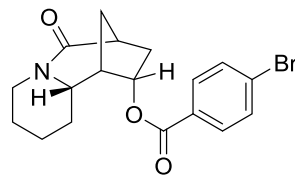

Structure of **42{13}** (Deposition number: CCDC 946100):

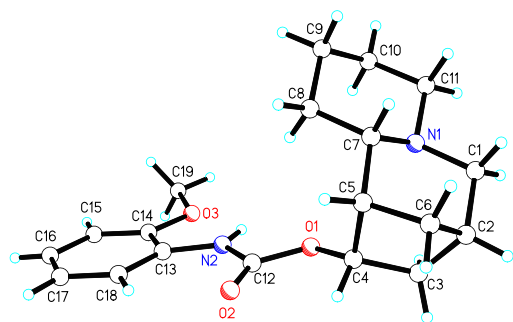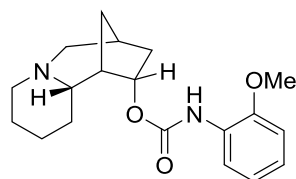

Structure of **43b{23}** (Deposition number: CCDC 946101):

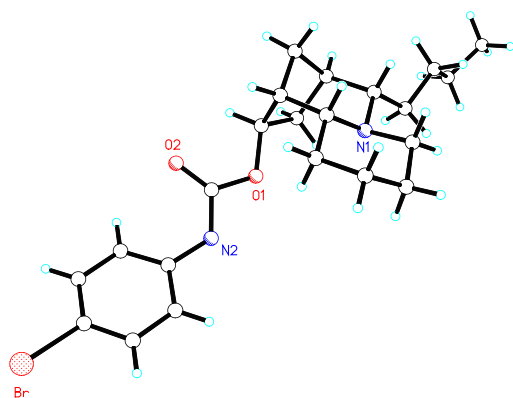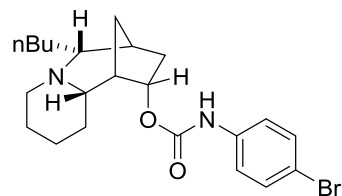

**Level A & B alerts encountered during IUCR's CheckCIF routine:**

| Compound name  | CCDC reference | A/B level alerts                                                                                                                                                 |
|----------------|----------------|------------------------------------------------------------------------------------------------------------------------------------------------------------------|
| <b>3b</b>      | 945414         | PLAT029_ALERT_3_B _diffn_measured_fraction_theta_full Low<br>..... 0.952                                                                                         |
| <b>3c</b>      | 945415         | PLAT222_ALERT_3_B Large Non-Solvent H Uiso(max)/Uiso(min) ..<br>8.6 Ratio                                                                                        |
| <b>3d</b>      | 945419         | PLAT029_ALERT_3_B _diffn_measured_fraction_theta_full Low<br>..... 0.952                                                                                         |
| <b>S3b</b>     | 945416         | None                                                                                                                                                             |
| <b>S3c</b>     | 945417         | PLAT089_ALERT_3_B Poor Data / Parameter Ratio (Zmax < 18)<br>..... 5.13                                                                                          |
| <b>S3d</b>     | 945421         | PLAT029_ALERT_3_B _diffn_measured_fraction_theta_full Low<br>..... 0.950<br><br>PLAT031_ALERT_4_B Refined Extinction Parameter within Range<br>..... 1.000 Sigma |
| <b>S6</b>      | 945413         | PLAT410_ALERT_2_B Short Intra H...H Contact H9B .. H11D ..<br>1.89 Ang.<br><br>PLAT431_ALERT_2_B Short Inter HL..A Contact Br .. O3 . 3.06<br>Ang.               |
| <b>29d{2}</b>  | 945418         | PLAT029_ALERT_3_B _diffn_measured_fraction_theta_full Low<br>..... 0.953                                                                                         |
| <b>29c{8}</b>  | 945420         | None                                                                                                                                                             |
| <b>S14</b>     | 946099         | PLAT431_ALERT_2_B Short Inter HL..A Contact Br .. O1 . 3.03<br>Ang.                                                                                              |
| <b>42{13}</b>  | 946100         | None                                                                                                                                                             |
| <b>43b{23}</b> | 946101         | None                                                                                                                                                             |

**Justification for alerts:**

- The checkCIF B-alerts for the crystal structures reported in this manuscript are principally due to the fact that Cu radiation, instead of the more traditional Mo radiation, was used to collect the diffraction data or that hydrogen atom parameters were actually refined instead of being fixed at idealized values. Most of the crystals (10 of 12) used in the present studies were too small to use with the in-house instrument that uses a Mo sealed-tube x-ray source. Since it is physically difficult to get close to full coverage at high diffraction angles with Cu radiation on a CCD diffractometer, four of the twelve structures (Compounds **3b**, **3d**, **S3d** and **29d{2}**; CCDC reference numbers 945414, 945419, 945421, and 945418) have PLAT029\_ALERT\_3\_B\_diffn\_measured\_fraction\_theta\_full\_Low alerts because their coverage was between 95% and 96% at a resolution of 0.844 Å. The alert B “threshold” value is 96% at this resolution.
- The PLAT222\_ALERT\_3\_B Large Non-Solvent H Uiso(max)/Uiso(min) alert for Compound **3c** (CCDC reference # 945415) is due to the fact that hydrogen atom thermal parameters were actually refined instead of being fixed at a multiplier of the nonhydrogen atom to which it is covalently bonded. The ability to actually refine hydrogen atom parameters to reasonable values is an indication of high quality data. Some of the hydrogen isotropic thermal parameters refined to low (but positive) values.

- The PLAT089\_ALERT\_3\_B Poor Data/Parameter Ratio alert for compound **S3c** (CCDC reference # 945417) is due to the facts that Cu radiation was used, hydrogen atom parameters were actually refined instead of being fixed at idealized values and the crystal utilized a noncentrosymmetric space group.
- The PLAT431\_ALERT\_2B Short Inter HL..A Contact Br..O alerts for Compounds **S6** and **S14** (CCDC Reference Nos. 945413 and 946099) are due to checkCIF's choice of van der Waals radii for Br and O. A contact of 3.03- 3.06 Å is not unreasonable.
- The PLATT410ALERT\_2\_B Short Intra H...H Contact for Compound **S6** (CCDC Reference # 945413) alert is caused by disorder.
- The PLAT031\_ALERT\_4\_B Refined Extinction Parameter with Range...1.000 Sigma for compound **S3d** (CCDC Reference 945421) just informs you that the s.u. of the extinction parameter is the nearly the same as its value.



## VII. Supplementary References:

- (1) Pilli, R. A.; Rosso, G. B.; de Oliveira, M. d. C. F. *Nat. Prod. Rep.* **2010**, *27*, 1908.
- (2) Pilli, R. A.; Rosso, G. B.; De, O. M. d. C. F. *Alkaloids (San Diego, CA, U. S.)* **2005**, *62*, 77.
- (3) Pilli, R. A.; Ferreira, d. O. M. d. C. *Nat. Prod. Rep.* **2000**, *17*, 117.
- (4) Yang, X.-Z.; Zhu, J.-Y.; Tang, C.-P.; Ke, C.-Q.; Lin, G.; Cheng, T.-Y.; Rudd, J. A.; Ye, Y. *Planta Med.* **2009**, *75*, 174.
- (5) Lin, L.-G.; Leung, H. P.-H.; Zhu, J.-Y.; Tang, C.-P.; Ke, C.-Q.; Rudd, J. A.; Lin, G.; Ye, Y. *Tetrahedron* **2008**, *64*, 10155.
- (6) Lin, L.-G.; Li, K. M.; Tang, C.-P.; Ke, C.-Q.; Rudd, J. A.; Lin, G.; Ye, Y. *J. Nat. Prod.* **2008**, *71*, 1107.
- (7) Lin, L.-G.; Zhong, Q.-X.; Cheng, T.-Y.; Tang, C.-P.; Ke, C.-Q.; Lin, G.; Ye, Y. *J. Nat. Prod.* **2006**, *69*, 1051.
- (8) Chung, H.-s.; Hon, P.-m.; Lin, G.; But, P. P.-h.; Dong, H. *Planta Med.* **2003**, *69*, 914.
- (9) Sakata, K.; Aoki, K.; Chang, C.-F.; Sakurai, A.; Tamura, S.; Murakoshi, S. *Agric. Biol. Chem.* **1978**, *42*, 457.
- (10) Ye, Y.; Qin, G.-W.; Xu, R.-S. *Phytochemistry* **1994**, *37*, 1205.
- (11) Brem, B.; Seger, C.; Pacher, T.; Hofer, O.; Vajrodaya, S.; Greger, H. *J. Agric. Food Chem.* **2002**, *50*, 6383.
- (12) Jiwajinda, S.; Hirai, N.; Watanabe, K.; Santisopasri, V.; Chuengsamarnyart, N.; Koshimizu, K.; Ohigashi, H. *Phytochemistry* **2001**, *56*, 693.
- (13) Kaltenecker, E.; Brem, B.; Mereiter, K.; Kalchauer, H.; Kahlig, H.; Hofer, O.; Vajrodaya, S.; Greger, H. *Phytochemistry* **2003**, *63*, 803.
- (14) Mungkornasawakul, P.; Chaiyong, S.; Sastraruji, T.; Jatisatienr, A.; Jatisatienr, C.; Pyne, S. G.; Ung, A. T.; Korth, J.; Lie, W. *J. Nat. Prod.* **2009**, *72*, 848.
- (15) Mungkornasawakul, P.; Pyne, S. G.; Jatisatienr, A.; Supyen, D.; Jatisatienr, C.; Lie, W.; Ung, A. T.; Skelton, B. W.; White, A. H. *J. Nat. Prod.* **2004**, *67*, 675.
- (16) Shinozaki, H.; Ishida, M. *Brain Res.* **1985**, *334*, 33.
- (17) Schild, H. *Ber. Dtsch. Chem. Ges.* **1936**, *69*, 74.
- (18) Sastraruji, T.; Chaiyong, S.; Jatisatienr, A.; Pyne, S. G.; Ung, A. T.; Lie, W. *J. Nat. Prod.* **2011**, *74*, 60.
- (19) Sastraruji, K.; Sastraruji, T.; Pyne, S. G.; Ung, A. T.; Jatisatienr, A.; Lie, W. *J. Nat. Prod.* **2010**, *73*, 935.
- (20) Wang, P.; Liu, A.-L.; An, Z.; Li, Z.-H.; Du, G.-H.; Qin, H.-L. *Chem. Biodiversity* **2007**, *4*, 523.
- (21) Chanmahasathien, W.; Ohnuma, S.; Ambudkar, S. V.; Limtrakul, P. *Planta Med.* **2011**, *77*, 1990.
- (22) Chanmahasathien, W.; Ampasavate, C.; Greger, H.; Limtrakul, P. *Phytomedicine* **2011**, *18*, 199.
- (23) Weinreb, S. M. *Chem. Rev.* **2006**, *106*, 2531.
- (24) Blackman, A. J.; Li, C.; Hockless, D. C. R.; Skelton, B. W.; White, A. H. *Tetrahedron* **1993**, *49*, 8645.
- (25) Dutta, S.; Abe, H.; Aoyagi, S.; Kibayashi, C.; Gates, K. S. *J. Am. Chem. Soc.* **2005**, *127*, 15004.
- (26) Patil, A. D.; Freyer, A. J.; Reichwein, R.; Carte, B.; Killmer, L. B.; Faucette, L.; Johnson, R. K. *Tetrahedron Lett.* **1997**, *38*, 363.
- (27) Biard, J. F.; Guyot, S.; Roussakis, C.; Verbist, J. F.; Vercauteren, J.; Weber, J. F.; Boukef, K. *Tetrahedron Lett.* **1994**, *35*, 2691.
- (28) Sauviat, M.-P.; Vercauteren, J.; Grimaud, N.; Juge, M.; Nabil, M.; Petit, J.-Y.; Biard, J.-F. *J. Nat. Prod.* **2006**, *69*, 558.
- (29) Juge, M.; Grimaud, N.; Biard, J.-F.; Sauviat, M.-P.; Nabil, M.; Verbist, J.-F.; Petit, J.-Y. *Toxicon* **2001**, *39*, 1231.

- (30) Gericke, N.; Viljoen, A. M. *Journal of Ethnopharmacology* **2008**, *119*, 653.
- (31) Gericke, N. P.; Van, W. B.-E.; Farmac Nederland B.V., Neth.; Dyer, Alison, Margaret; Gericke, Nigel Peter; Van Wyk, Ben-Erik . 1997, p 37 pp.
- (32) Harvey, A. L.; Young, L. C.; Viljoen, A. M.; Gericke, N. P. *J. Ethnopharmacol.* **2011**, *137*, 1124.
- (33) Napoletano, M.; Fraire, C.; Santangelo, F.; Moriggi, E. *Chemistry Preprint Archive*, 303.
- (34) Pagliosa, L. B.; Monteiro, S. C.; Silva, K. B.; de, A. J. P.; Dutilh, J.; Bastida, J.; Cammarota, M.; Zuanazzi, J. A. S. *Phytomedicine* **2010**, *17*, 698.
- (35) Furusawa, E.; Irie, H.; Combs, D.; Wildman, W. C. *Chemotherapy* **1980**, *26*, 28.
- (36) Weniger, B.; Italiano, L.; Beck, J. P.; Bastida, J.; Bergonon, S.; Codina, C.; Lobstein, A.; Anton, R. *Planta Med.* **1995**, *61*, 77.
- (37) Perez, E. G.; Mendez-Galvez, C.; Cassels, B. K. *Nat. Prod. Rep.* **2012**, *29*, 555.
- (38) Daly, J. W. *Cell. Mol. Neurobiol.* **2005**, *25*, 513.
- (39) Fuentes, J. J. *Pharmacol. Exp. Ther.* **1957**, *119*, 427.
- (40) Sakurai, Y.; Takano, Y.; Kohjimoto, Y.; Honda, K.; Kamiya, H.-o. *Brain Res.* **1982**, *242*, 99.
- (41) Haefely, W. *Naunyn-Schmiedeberg's Arch. Pharmacol.* **1974**, *281*, 93.
- (42) Zachowski, J. *Arch. Exp. Pathol. Pharmacol.* **1938**, *189*, 326.
- (43) Barlow, R. B.; McLeod, L. J. *Brit. J. Pharmacol.* **1969**, *35*, 161.
- (44) Dale, H. H.; Laidlaw, P. J. *Pharm. Exp. Therap.* **1912**, *3*, 205.
- (45) Pabreza, L. A.; Dhawan, S.; Kellar, K. J. *Mol. Pharmacol.* **1991**, *39*, 9.
- (46) Schwartz, R. D.; McGee, R., Jr.; Kellar, K. J. *Mol. Pharmacol.* **1982**, *22*, 56.
- (47) Bauer, R. A.; Wurst, J. M.; Tan, D. S. *Curr. Opin. Chem. Bio.* **2010**, *14*, 308.
- (48) Midland, M. M.; Koops, R. W. *J. Org. Chem.* **1990**, *55*, 5058.
- (49) Stetter, H.; Landscheidt, A. *Chem. Ber.* **1979**, *112*, 1410.
- (50) De, G. M.; Zard, S. Z. *Org. Lett.* **2007**, *9*, 1773.
- (51) Sugawara, Y.; Yamada, W.; Yoshida, S.; Ikeno, T.; Yamada, T. *J. Am. Chem. Soc.* **2007**, *129*, 12902.
- (52) Carreno, M. C.; Garcia, R. J. L.; Remor, C. Z.; Urbano, A. *Tetrahedron: Asymmetry* **2000**, *11*, 4279.
- (53) Huh, C. W.; Somal, G. K.; Katz, C. E.; Pei, H.; Zeng, Y.; Douglas, J. T.; Aube, J. *J. Org. Chem.* **2009**, *74*, 7618.
- (54) Zeng, Y.; Reddy, D. S.; Hirt, E.; Aube, J. *Org. Lett.* **2004**, *6*, 4993.
- (55) Guérot, C.; Tchitchanov, B. H.; Knust, H.; Carreira, E. M. *Org. Lett.* **2011**, *13*, 780.
- (56) Bogdanowicz, M. J.; Trost, B. M. *Org. Synth.* **1974**, *54*.
- (57) Yoshida, M.; Sugimoto, K.; Ihara, M. *Org. Lett.* **2004**, *6*, 1979.
- (58) Zhou, L.; Liu, X.; Ji, J.; Zhang, Y.; Hu, X.; Lin, L.; Feng, X. *J. Am. Chem. Soc.* **2012**, *134*, 17023.
- (59) Ekkati, A. R.; Mandiyan, V.; Ravindranathan, K. P.; Bae, J. H.; Schlessinger, J.; Jorgensen, W. L. *Tetrahedron Lett.* **2011**, *52*, 2228.
- (60) Roy, B. N.; Singh, G. P.; Lathi, P. S.; Agrawal, M. K.; Mitra, R.; Trivedi, A.; Lupin Limited, India . 2012, p 54pp.; Chemical Indexing Equivalent to 158:131489 (IN).
- (61) Bienaymé, H.; Guicher, N. *Tetrahedron Lett.* **1997**, *38*, 5511.
- (62) Weissfloch, A.; Azerad, R. *Bioorgan. Med. Chem.* **1994**, *2*, 493.
- (63) Smith, B. T.; Wendt, J. A.; Aube, J. *Org. Lett.* **2002**, *4*, 2577.
- (64) Hayashi, Y.; Yamaguchi, H.; Toyoshima, M.; Okado, K.; Toyo, T.; Shoji, M. *Org. Lett.* **2008**, *10*, 1405.
- (65) Gendrineau, T.; Demoulin, N.; Navarre, L.; Genet, J.-P.; Darses, S. *Chem. - Eur. J.* **2009**, *15*, 4710.
- (66) Li, X.; Danishefsky, S. J. *J. Am. Chem. Soc.* **2010**, *132*, 11004.

- (67) SYBYL-X 2.0, Tripos International, 1699 South Hanley Rd., St. Louis, Missouri, 63144, USA. <http://www.tripos.com/index.php>
- (68) VCCLAB, Virtual Computational Chemistry Laboratory, <http://www.vcclab.org>, 2005
- (69) Tetko, I. V.; Gasteiger, J.; Todeschini, R.; Mauri, A.; Livingstone, D.; Ertl, P.; Palyulin, V. A.; Radchenko, E. V.; Zefirov, N. S.; Makarenko, A. S.; Tanchuk, V. Y.; Prokopenko, V. V. *J. Comput.-Aided Mol. Des.* **2005**, *19*, 453.
- (70) The R Project for Statistical Computing; <http://www.r-project.org/>
- (71) Molecular Operating Environment (MOE), 2012.10; Chemical Computing Group Inc., 1010 Sherbooke St. West, Suite #910, Montreal, QC, Canada, H3A 2R7, 2012.
- (72) Chen, I. J.; Foloppe, N. *J. Chem. Inf. Model.* **2008**, *48*, 1773.
- (73) Kopp, F.; Stratton, C. F.; Akella, L. B.; Tan, D. S. *Nat. Chem. Biol.* **2012**, *8*, 358.
- (74) Sauer, W. H. B.; Schwarz, M. K. *J. Chem. Inf. Comp. Sci.* **2003**, *43*, 987.
